# Supplementary material for: Elevated apolipoprotein C3 heightens atherosclerosis risk by mediating arterial accumulation of free cholesterol and local inflammation in diabetes
Source: Research Square preprint supplement (doi:10.21203/rs.3.rs-6979508/v1), 2025-07-16
Supplement: Supplementary file 1 [file 3a9eaf86441d9ab35012c081.xlsx]

## Sheet: READ ME
1	2 different models of type 1 diabtes: STZ (beta cell toxin) and LCMV (transgenic model), all experiments run in triplicates
2	In the LCMV model, some diabetic mice were treated with an APOC3 antisense oligonucleotide (ASO) to reduce triglyceride-rich lipoproteins
3	DEG=differentially expressed gene
4	resimac=resident macrophages
5	Inflmac=inlammatory macrophages
6	Trem2hi=trem2high macropahges
7	EC=endothelial cells
8	SMC=Smooth muscle cells
9	_NDvD (STZ), positive log fold= increased in D
10	_NDvD (LCMV), positive log fold= increased in D
11	_cASOvAPOC3 (LCMV), postive log fold= increased in APOC3 ASO treated mice

## Sheet: DEC_resimac_NDvsD (LCMV)
Genes	D-1	D-2	D-3	ND-1	ND-2	ND-3	p_val	avg_log2FC	pct.1	pct.2	p_val_adj
Hspa1b	1.0557	1.16582	0.539	0	2.7687	3.04699	6.31939e-63	-3.60845	0.238	0.759	1.39886e-58
Hspa1a	1.48565	1.76364	1.29888	0.962458	2.71331	2.87059	7.4556e-42	-2.10774	0.541	0.804	1.65037e-37
Ifi27l2a	2.89952	2.09447	2.0162	1.76719	3.56436	3.05186	2.77498e-41	-1.70238	0.715	0.926	6.1427e-37
Hsp90ab1	2.52355	2.14867	2.08591	1.76719	2.7023	2.72987	2.10737e-25	-0.827643	0.91	0.971	4.66487e-21
Gpx3	1.54113	1.67073	1.36466	0	0.380607	0.779095	3.02954e-24	2.12165	0.519	0.164	6.70618e-20
Pla2g7	1.8494	1.70609	1.89141	1.44368	1.15302	1.30545	3.02242e-23	1.09865	0.822	0.54	6.69042e-19
Mgl2	0.501451	1.11998	1.30153	0.962458	1.95917	1.94386	7.9219e-22	-1.49309	0.421	0.688	1.75359e-17
Ucp2	2.51579	2.40252	2.61865	1.44368	2.00716	2.19696	6.16812e-19	0.687749	0.948	0.842	1.36537e-14
Hsp90aa1	2.04529	1.50122	1.56796	0	2.30669	2.27662	6.20975e-19	-1.0938	0.725	0.814	1.37459e-14
Ccl24	1.3682	1.16446	1.12931	0.962458	1.82528	2.19537	2.15012e-18	-1.52777	0.412	0.662	4.7595e-14
Hspa8	2.85143	2.75452	2.56126	3.09266	3.00999	3.10216	6.27338e-18	-0.572326	0.953	0.977	1.38867e-13
Arhgap15	1.83842	1.7387	1.94708	0.962458	1.28284	1.42656	3.52683e-15	0.918226	0.751	0.531	7.80699e-11
Slc40a1	0.699211	0.316905	0.293907	0	0.870348	1.08144	4.26782e-15	-1.84526	0.118	0.341	9.44724e-11
Hspa5	2.43473	2.15331	2.2273	2.51178	2.79649	2.65507	7.24184e-15	-0.773634	0.878	0.932	1.60305e-10
Ifitm3	2.25346	1.97639	1.75105	0.962458	2.78558	2.1988	8.59391e-15	-0.995096	0.742	0.82	1.90235e-10
mt-Co3	3.88876	3.56071	3.50552	3.90285	3.83385	3.94204	1.57463e-14	-0.432051	0.996	0.997	3.48559e-10
Hspb1	0.274094	0.208555	0.199214	0	1.05722	0.89467	4.45981e-14	-2.78639	0.073	0.264	9.87223e-10
Mafb	2.07309	2.56193	2.718	0.962458	2.04645	2.24283	4.75497e-14	0.699839	0.901	0.746	1.05256e-09
Ccl7	2.46064	2.77396	2.45726	3.72456	3.45228	3.11933	1.10202e-13	-1.10761	0.622	0.772	2.43943e-09
mt-Cytb	3.04779	2.76094	2.69086	2.7449	3.17091	3.03174	1.24965e-13	-0.494757	0.951	0.977	2.76622e-09
Ccl2	2.53901	2.93775	2.47795	2.20724	3.29944	3.18273	2.15511e-13	-0.868939	0.783	0.881	4.77055e-09
Pf4	3.26831	3.55198	3.51874	2.93382	3.93815	3.91777	4.0994e-13	-0.637823	0.968	0.977	9.07443e-09
Gm42418	5.36906	3.8861	3.90508	5.26557	3.75635	3.5151	4.81332e-13	0.977355	0.994	0.981	1.06548e-08
Nfkbiz	1.8875	2.55201	2.13832	2.51178	2.6517	2.70549	8.59333e-13	-0.638038	0.828	0.9	1.90222e-08
Tmsb4x	4.64193	4.88787	4.82032	4.94277	5.11495	4.93014	6.10612e-12	-0.306192	1	1	1.35165e-07
Apoe	4.6779	4.96468	5.11947	5.37625	4.57943	4.73944	1.60745e-11	0.498888	0.998	0.981	3.55824e-07
Klf6	1.80383	2.53432	2.18847	1.44368	2.75091	2.80354	1.78884e-11	-0.778861	0.856	0.887	3.95978e-07
Ifi203	1.39352	0.71662	0.684044	0.962458	1.64936	1.09356	3.64671e-11	-1.23177	0.384	0.556	8.07235e-07
Fosb	2.02472	2.37656	1.86147	2.63512	2.62548	2.67834	4.11402e-11	-0.885442	0.749	0.839	9.10679e-07
Dnajb1	0.903131	0.768925	0.791954	0	1.48582	1.44085	5.17551e-11	-1.42716	0.356	0.534	1.14565e-06
Folr2	2.04753	1.70033	1.77138	2.20724	2.2459	2.18417	5.24474e-11	-0.699215	0.717	0.833	1.16098e-06
Cbr2	2.55431	1.95078	2.02854	2.51178	2.4337	2.43524	6.18413e-11	-0.524426	0.807	0.91	1.36892e-06
mt-Nd4	3.00007	2.69269	2.63678	2.93382	3.05729	2.96652	6.54357e-11	-0.445979	0.923	0.965	1.44848e-06
Maml3	0.380732	0.59881	0.770536	0.962458	0.115846	0.312034	9.94145e-11	1.91024	0.273	0.084	2.20064e-06
Arl4c	0.854342	1.0131	0.975124	0.962458	0.616609	0.426081	1.31921e-10	1.22292	0.416	0.193	2.9202e-06
Ccr1	1.12763	1.0552	1.29762	1.44368	0.699742	0.767231	1.66873e-10	1.07309	0.491	0.26	3.6939e-06
Ifi207	2.05692	2.04801	1.87065	3.01639	2.43799	2.26088	1.71224e-10	-0.641122	0.811	0.865	3.79022e-06
Camk1d	2.59787	1.78606	2.01732	0	1.5612	1.61698	2.80163e-10	0.831305	0.807	0.666	6.2017e-06
Bst2	1.52038	1.00764	0.931523	0.962458	1.81237	1.48067	2.82787e-10	-1.14702	0.498	0.637	6.25978e-06
Ubc	1.68962	2.49442	2.32687	0.962458	2.61088	2.79352	4.48727e-10	-0.605039	0.867	0.913	9.93301e-06
Rpl41	3.08274	3.57218	3.55677	3.29175	3.65879	3.76727	7.70952e-10	-0.312842	0.991	0.994	1.70658e-05
Apobec1	0.928893	1.07431	1.04965	0.962458	0.629366	0.675364	8.82976e-10	0.986594	0.481	0.257	1.95456e-05
Clec4d	0.931119	0.867666	0.929463	0	0.531686	0.356429	9.14707e-10	1.37731	0.367	0.164	2.0248e-05
Ncf1	1.4329	1.00382	1.24626	2.20724	0.764211	0.88749	1.29478e-09	0.832733	0.586	0.334	2.86612e-05
Tslp	0.775432	0.441784	0.248248	0	0.855248	0.848141	1.32445e-09	-1.36601	0.17	0.338	2.93181e-05
Nr4a1	1.16795	1.42196	1.21991	2.20724	0.679595	0.991129	2.37487e-09	0.963673	0.496	0.267	5.25701e-05
Gm10076	2.37337	1.56437	1.26884	2.01123	1.14111	1.17558	2.75809e-09	0.907107	0.71	0.537	6.10531e-05
Hgsnat	1.36557	1.41995	1.22712	0	1.02016	0.843878	2.97034e-09	0.821394	0.547	0.325	6.57515e-05
Igkc	0.0384573	0.282377	0.639011	0	0	0	3.64609e-09	7.44973	0.105	0	8.07099e-05
Wnk1	2.16201	1.96866	2.04689	2.01123	1.7197	1.82641	4.99441e-09	0.451047	0.882	0.73	0.000110556
Nav1	1.43163	1.32117	1.4739	1.44368	1.00836	1.08448	6.31834e-09	0.752702	0.661	0.46	0.000139863
Mir142hg	1.30867	1.53967	1.60979	0.962458	1.11415	1.25355	6.35478e-09	0.697444	0.682	0.46	0.000140669
Malat1	4.41033	4.33865	4.57751	2.01123	4.15518	4.09923	6.66923e-09	0.508742	0.979	0.952	0.00014763
Abhd12	1.31714	1.20248	1.41981	0	1.06904	1.0417	6.86808e-09	0.576791	0.687	0.434	0.000152032
Cmss1	2.79631	1.26076	1.36034	0.962458	1.06305	1.21655	7.83821e-09	1.15862	0.631	0.447	0.000173507
Wfdc17	2.56086	2.92489	2.9037	2.84382	3.39279	3.20397	7.91564e-09	-0.666001	0.83	0.894	0.000175221
Rtp4	0.261397	0.155712	0.196621	0	0.701229	0.595562	8.92126e-09	-2.09321	0.077	0.212	0.000197481
Zdhhc14	1.55406	1.37174	1.3366	0.962458	1.05048	1.03274	9.6418e-09	0.708719	0.657	0.441	0.000213431
Dennd4c	0.942197	0.639456	0.840598	0.962458	0.492636	0.376152	1.0276e-08	1.12317	0.378	0.183	0.00022747
Hspe1	0.422059	0.880664	0.818642	0.962458	1.27627	1.30629	1.03763e-08	-1.13241	0.393	0.531	0.000229691
Tsc22d2	1.0649	0.824181	0.962742	0	0.477071	0.660049	1.27132e-08	1.00928	0.433	0.235	0.000281419
Pkm	1.11975	0.989014	0.910236	0	0.771666	0.590007	1.34557e-08	0.737908	0.5	0.283	0.000297855
AY036118	2.07081	1.42209	1.54616	0.962458	1.10956	0.956173	1.6924e-08	1.13716	0.515	0.302	0.000374629
Foxp1	1.57597	1.83753	1.87861	2.01123	1.43075	1.52552	2.26647e-08	0.609911	0.792	0.621	0.000501706
Zfp36	2.42099	3.44837	3.11224	3.35019	3.31504	3.6226	2.64921e-08	-0.455516	0.94	0.958	0.000586428
Cd209g	0.431735	0.40185	0.132893	0.962458	0.881632	0.809894	3.2531e-08	-2.01644	0.073	0.203	0.000720106
Lars2	2.14424	0.784353	0.764081	1.44368	0.595619	0.61211	3.57925e-08	1.37574	0.438	0.251	0.000792304
Mpeg1	1.46401	1.35028	1.28965	2.20724	1.20358	0.829645	3.59671e-08	0.607804	0.575	0.354	0.000796167
Dnaja1	1.76016	1.32631	1.14965	1.44368	1.85029	1.71127	3.65646e-08	-0.82774	0.562	0.666	0.000809394
S100a4	1.5527	1.76996	1.82128	0	1.40432	1.24542	3.75745e-08	0.802012	0.468	0.254	0.00083175
mt-Co2	3.89586	3.5868	3.46193	3.76285	3.86725	3.66582	3.83761e-08	-0.278523	0.991	0.997	0.000849494
mt-Co1	4.28849	4.01113	3.85637	4.10875	4.16929	4.14091	3.98217e-08	-0.241131	0.998	0.994	0.000881493
Hsp90b1	2.10896	2.02475	2.0186	1.44368	2.33751	2.35819	5.0995e-08	-0.503936	0.88	0.897	0.00112883
Eif4g3	0.993218	0.85464	0.888048	0	0.657008	0.614551	5.87371e-08	0.700666	0.47	0.264	0.0013002
Tuba1b	1.27406	1.28529	1.36764	0.962458	1.74579	1.71788	6.7995e-08	-0.749745	0.633	0.736	0.00150514
Grik1	0.749421	0.147471	0.365564	0	0.0339074	0.194398	7.59257e-08	1.86002	0.155	0.032	0.00168069
Ttc39c	0.0415907	0.183989	0.344354	0	0	0	7.9549e-08	6.45227	0.088	0	0.0017609
Ms4a4a	0.572656	0.460257	0.60844	0.962458	0.131103	0.416851	9.1901e-08	1.16717	0.258	0.1	0.00203432
Mef2a	1.8438	1.71981	2.04314	1.76719	1.4847	1.65614	9.37113e-08	0.590149	0.818	0.675	0.00207439
Lgals3	1.51505	1.33118	1.17965	0	0.879866	0.842429	9.3842e-08	0.954071	0.504	0.309	0.00207729
Cx3cr1	0.706068	1.19817	1.55004	0	0.684415	0.979322	1.00921e-07	1.09434	0.386	0.203	0.00223398
Hist1h1c	0.916133	0.904025	1.12689	1.76719	0.741957	0.485427	1.02889e-07	1.00579	0.369	0.183	0.00227754
Foxn3	1.41572	1.41128	1.49123	0	1.07265	1.16269	1.12338e-07	0.673338	0.68	0.479	0.00248671
Lrmda	1.37482	1.22876	1.31951	0	0.826167	0.976003	1.372e-07	0.865898	0.511	0.315	0.00303706
Otulinl	0.942609	0.887901	0.938379	0.962458	0.648656	0.631492	1.45763e-07	0.747581	0.466	0.257	0.00322661
Tgif1	0.753134	0.981207	0.844001	0	0.438905	0.680609	1.62026e-07	0.90282	0.391	0.203	0.0035866
Cd63	2.26327	2.19947	2.18629	2.20724	1.90629	1.98811	1.7141e-07	0.421847	0.899	0.82	0.00379434
Ctss	2.69345	2.5105	2.61519	3.01639	2.39339	2.37758	1.80413e-07	0.32154	0.957	0.904	0.00399363
Diaph2	1.72832	1.54666	1.65647	0	1.27364	1.33508	1.81537e-07	0.619486	0.727	0.553	0.00401849
Ccl8	2.54693	2.9435	3.04956	0	2.60484	2.22609	1.8445e-07	0.789903	0.648	0.479	0.00408299
Birc6	0.85088	0.671681	0.76769	0	0.546213	0.497713	2.04062e-07	0.69962	0.395	0.193	0.00451711
Jund	2.5276	3.2512	2.74228	3.8353	3.20637	3.18983	2.1391e-07	-0.417021	0.927	0.961	0.00473511
Tcf4	2.04946	2.12153	2.18255	1.44368	1.85025	1.92733	2.16681e-07	0.422821	0.906	0.756	0.00479646
Pla2g2d	0.669975	0.585787	0.372198	0	0.79804	1.09576	2.51446e-07	-1.28384	0.129	0.27	0.00556602
Rps6ka5	0.460799	0.363996	0.457706	0	0.102804	0.260464	2.93847e-07	1.39924	0.21	0.071	0.0065046
Rsrc1	0.753203	0.637558	0.791001	0	0.525096	0.430313	3.05705e-07	0.812318	0.35	0.17	0.00676708
Grn	2.94389	2.76293	2.80679	3.01639	3.05912	3.06877	3.18905e-07	-0.378735	0.981	0.987	0.00705927
Zeb2	2.60564	2.75966	2.85633	2.37106	2.42559	2.63157	3.32917e-07	0.397708	0.951	0.926	0.00736946
Eif1	2.66472	2.92653	2.77813	3.45771	3.02151	2.96622	3.47053e-07	-0.275841	0.957	0.965	0.00768237
Uba52	1.92685	1.62925	1.05806	1.44368	0.75732	1.36107	3.86114e-07	0.722597	0.618	0.444	0.00854701
Gm34084	0.170647	0.0603712	0.0563486	0	0.482392	0.319166	3.94977e-07	-2.61923	0.043	0.141	0.0087432
Itpkb	0.93623	0.71947	0.7315	0	0.452638	0.443424	3.96748e-07	1.0163	0.365	0.19	0.00878242
Bcas3	0.640072	0.529944	0.731525	0	0.361535	0.428884	4.1065e-07	0.920091	0.307	0.138	0.00909014
Serinc3	3.16511	3.08469	3.14163	3.01639	2.8853	2.9964	4.45665e-07	0.280406	0.983	0.958	0.00986525
Vim	1.94163	2.27307	1.90666	0.962458	2.62175	2.34156	4.80326e-07	-0.704984	0.749	0.765	0.0106325
Rpl3	2.09065	2.16149	2.1916	1.44368	1.95497	1.91393	5.51386e-07	0.383235	0.901	0.807	0.0122055
Immp2l	1.28292	1.31226	1.29379	0	0.93375	0.943479	5.58185e-07	0.778566	0.515	0.315	0.012356
Polr2a	1.39324	1.248	1.38023	0	0.924715	1.11327	6.58429e-07	0.667403	0.635	0.441	0.014575
Gphn	1.67986	1.0375	1.25427	1.76719	0.89897	0.934087	7.2212e-07	0.760316	0.569	0.367	0.0159849
Oas2	0.401079	0.22982	0.0881196	0	0.65835	0.430641	7.34736e-07	-1.7796	0.084	0.199	0.0162641
Hsph1	0.469229	0.110102	0.281534	0.962458	0.606461	0.72394	7.38342e-07	-1.67382	0.103	0.225	0.0163439
Tspan4	0.528601	0.587773	0.622541	0	0.362978	0.406682	7.54882e-07	0.796472	0.296	0.135	0.0167101
Fyb	1.69682	1.40326	1.41259	2.20724	1.17826	1.21609	7.61573e-07	0.505701	0.704	0.498	0.0168582
Dok2	0.380943	0.415419	0.413285	0	0.606617	0.832368	7.90271e-07	-1.06121	0.195	0.338	0.0174934
Elmo1	1.39846	1.33066	1.57352	0.962458	1.00781	1.35998	8.03638e-07	0.537619	0.665	0.479	0.0177893
Myadm	0.86591	0.897234	0.838607	1.44368	1.17178	1.26186	8.6502e-07	-0.79283	0.425	0.537	0.0191481
B2m	3.31064	3.06719	2.81473	4.05412	3.23774	3.18447	9.13137e-07	-0.328537	0.983	0.984	0.0202132
Snx10	0.881756	0.753219	0.675776	0	0.510038	0.444846	9.2107e-07	0.829826	0.365	0.199	0.0203888
Mir99ahg	1.4882	1.49804	1.38605	0	1.03347	1.22047	9.28439e-07	0.632462	0.633	0.479	0.0205519
Mdfic	1.48383	1.51171	1.36426	2.01123	1.07528	1.19365	1.13444e-06	0.594861	0.68	0.524	0.0251119
Gab2	1.95113	1.625	1.6849	1.44368	1.3125	1.43914	1.21201e-06	0.617757	0.742	0.579	0.026829
Mat2a	1.52654	1.62122	1.73195	0.962458	1.91383	2.01227	1.21296e-06	-0.512897	0.73	0.785	0.02685
Maml2	1.20321	0.993716	1.16183	0.962458	0.775262	0.793545	1.25541e-06	0.775901	0.498	0.325	0.0277898
Tns1	1.61231	1.29229	1.493	1.44368	1.12699	1.22804	1.30327e-06	0.533522	0.682	0.479	0.0288491
Mtm1	0.679341	0.458115	0.548374	0	0.341901	0.134138	1.32385e-06	1.34906	0.225	0.09	0.0293047
Nrg2	0.592438	0.519221	0.635883	0	0.265556	0.360364	1.42534e-06	1.12618	0.258	0.109	0.0315513
mt-Nd1	3.1357	2.59465	2.53481	3.09266	2.91471	2.86049	1.46973e-06	-0.327534	0.933	0.958	0.032534
S100a6	1.83963	2.13111	2.18151	0	1.85883	1.73874	1.48485e-06	0.531501	0.594	0.399	0.0328686
Zc3h6	0.046263	0.1648	0.161431	0	0.0140507	0	1.50615e-06	3.916	0.079	0.003	0.03334
Fcrls	1.40407	1.02397	1.37232	1.44368	1.6578	1.62158	1.52578e-06	-0.699065	0.521	0.637	0.0337746
Cfp	1.10084	0.991073	1.15058	0.962458	1.5489	1.36819	1.53063e-06	-0.752694	0.481	0.592	0.033882
Abca1	2.21287	2.22902	2.25671	2.01123	1.9974	1.98648	1.56469e-06	0.406655	0.899	0.794	0.0346359
Ncl	1.48406	1.29688	1.53125	1.76719	1.16962	1.1746	1.59903e-06	0.538731	0.67	0.486	0.0353962
Apc	0.709126	0.799519	0.680825	0	0.55344	0.424592	1.66977e-06	0.749544	0.371	0.196	0.036962
Marcksl1	1.80832	2.52999	2.0786	1.76719	2.49153	2.68959	1.8625e-06	-0.573827	0.824	0.894	0.0412283
Cadm1	0.0822808	0.159137	0.447875	0	0.0966602	0.0274102	1.86936e-06	2.36159	0.112	0.019	0.0413802
H2-D1	2.16542	2.44008	2.23432	2.20724	2.51736	2.53539	1.94378e-06	-0.354904	0.901	0.91	0.0430275
Camk2d	1.05342	0.940375	1.09615	1.44368	0.810626	0.700178	2.01795e-06	0.671076	0.491	0.309	0.0446693
Cd209f	0.794978	0.51946	0.427368	0	1.30277	0.976744	2.26043e-06	-1.64891	0.105	0.225	0.0500368
Lgmn	3.14823	3.22774	3.2666	2.7449	2.9098	3.07438	2.38179e-06	0.366707	0.987	0.971	0.0527232
Tbc1d22a	0.474528	0.573795	0.691417	0.962458	0.351781	0.335397	2.55557e-06	1.04145	0.303	0.148	0.0565702
1810037I17Rik	1.00554	1.18891	1.107	0.962458	1.3884	1.46605	2.68952e-06	-0.610824	0.579	0.656	0.0595353
Ciita	0.222547	0.277724	0.232925	0	0.0454541	0.0324413	2.77816e-06	2.71487	0.09	0.01	0.0614972
1700054A03Rik	0.657571	0.126518	0.270879	0	0.0663957	0.0867754	2.82087e-06	2.08878	0.116	0.023	0.0624428
Picalm	2.11728	2.02347	2.17293	2.20724	1.90693	1.90523	2.86377e-06	0.344287	0.899	0.785	0.0633924
Bcl2a1b	0.493121	0.835063	1.00037	2.37106	0.620997	0.59692	3.08158e-06	0.689364	0.384	0.206	0.0682138
Rhoq	0.740237	0.883239	0.841642	0	0.598829	0.638435	3.18556e-06	0.626182	0.421	0.238	0.0705156
Vcam1	1.29821	1.27371	1.11522	0	0.706261	0.766521	3.29019e-06	1.10173	0.298	0.158	0.0728316
Ncoa1	1.12785	0.801794	1.179	0	0.635006	0.816159	3.34426e-06	0.80807	0.496	0.325	0.0740285
Gda	1.32743	1.08156	1.28084	1.76719	0.971654	0.762676	3.47776e-06	0.762652	0.438	0.273	0.0769838
Ddx5	2.18291	2.45249	2.32309	2.01123	2.6164	2.48529	3.79355e-06	-0.321358	0.942	0.939	0.0839741
N4bp2l1	0.555026	0.534414	0.47102	0	0.210118	0.327339	3.8524e-06	1.09476	0.236	0.1	0.0852767
Msrb1	0.470457	0.649778	0.60975	0	0.430189	0.2347	4.03199e-06	1.02754	0.29	0.145	0.0892522
Cerk	1.03593	0.861615	0.785278	1.76719	0.675073	0.716355	4.08403e-06	0.410199	0.451	0.248	0.0904041
Atxn7l1	0.965791	0.671031	0.714963	0	0.556413	0.529636	4.26213e-06	0.615984	0.382	0.215	0.0943464
Fmn1	0.723664	0.661303	0.679603	0	0.397932	0.502325	4.33631e-06	0.778685	0.335	0.174	0.0959886
C6	0.213239	0.509032	0.402264	0	0.166198	0.0486896	4.37146e-06	2.09902	0.118	0.026	0.0967666
Kif16b	0.330122	0.269702	0.428444	0	0.139447	0.204365	4.45851e-06	1.19962	0.189	0.068	0.0986936
Specc1	0.81376	0.694487	0.662577	0.962458	0.476058	0.552685	4.8258e-06	0.58098	0.363	0.196	0.106824
Tgfbr1	0.876069	0.654137	0.794953	0	0.553615	0.343584	5.04354e-06	0.976996	0.337	0.186	0.111644
Mbnl1	2.1717	2.18983	2.24086	1.44368	1.87754	2.06406	5.28163e-06	0.397514	0.891	0.794	0.116914
Bbx	0.690398	0.672054	0.459965	0	0.285291	0.358552	5.37173e-06	1.03758	0.285	0.141	0.118909
Gdi2	1.80982	1.6299	1.75838	1.76719	1.45369	1.52478	5.48258e-06	0.422412	0.822	0.64	0.121362
Lnpep	0.949107	1.09638	1.16802	0	0.808847	0.904135	5.65882e-06	0.592346	0.539	0.373	0.125264
Alpk1	0.40801	0.443779	0.480471	0	0.289959	0.176189	5.66279e-06	1.10905	0.223	0.093	0.125351
Klf2	1.46845	2.20643	2.0185	0.962458	2.24722	2.56727	6.05008e-06	-0.629963	0.689	0.733	0.133925
Rnf180	0.492705	0.575875	0.780425	0	0.472734	0.312564	6.2787e-06	0.961959	0.326	0.177	0.138985
Dleu2	1.42102	1.48552	1.56401	2.01123	1.04006	1.28886	6.8596e-06	0.669978	0.65	0.489	0.151844
Rgs1	0.220648	0.844373	1.08456	0	0.40193	0.588809	7.15141e-06	1.18729	0.234	0.106	0.158304
Apoc2	0.218852	0.344599	0.267124	0	0.0855858	0.066635	7.30785e-06	2.02473	0.12	0.029	0.161766
Gm15564	1.19855	0.183778	0.163827	0	0.0527541	0.192453	7.6773e-06	1.98395	0.142	0.042	0.169945
Timd4	0.621918	0.35972	0.284483	1.44368	0.648136	0.771363	7.88584e-06	-1.20636	0.159	0.28	0.174561
Slc27a1	0.564343	0.762979	0.7818	0.962458	0.431711	0.404206	8.27633e-06	1.07037	0.318	0.167	0.183205
Hes1	0.474013	1.07812	1.338	0	0.644411	0.862126	8.45529e-06	0.935311	0.391	0.238	0.187166
Etv6	1.05434	1.15683	1.02711	1.76719	0.943361	0.793901	8.56927e-06	0.461963	0.554	0.373	0.189689
Eif3h	0.809548	0.875533	0.914398	0.962458	0.689253	0.642095	8.68881e-06	0.579822	0.468	0.283	0.192336
Ms4a6c	2.0817	2.03751	2.22977	0	1.9326	1.96607	8.97493e-06	0.326054	0.897	0.791	0.198669
Rps17	2.06267	2.01747	1.9338	2.63512	1.74032	1.7947	9.09907e-06	0.363149	0.876	0.762	0.201417
Rpl12	1.95166	1.88256	1.84039	1.76719	1.68666	1.61523	9.33214e-06	0.38358	0.82	0.714	0.206576
Usp3	0.411865	0.400844	0.525856	0	0.206058	0.32112	9.64336e-06	0.97219	0.23	0.103	0.213465
Tln1	1.59898	1.08105	1.0486	0.962458	1.01935	0.858802	9.85428e-06	0.495256	0.562	0.389	0.218134
Shtn1	0.910666	0.848345	0.802941	0.962458	0.688248	0.605247	9.94086e-06	0.512333	0.429	0.254	0.220051
Cask	0.885203	0.675582	0.871728	0	0.542952	0.639717	1.00525e-05	0.631789	0.397	0.219	0.222522
Snx24	1.20877	1.18494	1.25969	2.01123	0.913059	1.00559	1.04731e-05	0.56616	0.567	0.386	0.231833
Arnt	0.585226	0.702711	0.507181	0	0.374185	0.418373	1.10236e-05	0.73256	0.311	0.158	0.244019
Polr2l	0.437135	0.385041	0.471485	0	0.702799	0.882066	1.10315e-05	-1.13947	0.185	0.302	0.244192
Sik1	0.331387	0.57826	0.405031	0.962458	0.157347	0.23426	1.16526e-05	1.38579	0.2	0.084	0.257941
Sat1	2.06309	2.37495	2.06797	1.76719	2.44883	2.4674	1.16897e-05	-0.433082	0.884	0.887	0.258762
Abhd15	0.14903	0.111888	0.222976	0	0	0.0533326	1.19753e-05	2.69435	0.075	0.006	0.265085
Spag9	1.34529	1.44742	1.21556	0	1.00891	1.08078	1.2009e-05	0.583969	0.618	0.46	0.26583
Atrnl1	0.846215	0.916286	0.968887	0	0.703957	0.694364	1.21973e-05	0.60673	0.446	0.273	0.269999
Nr1d2	0.281866	0.388258	0.268131	0	0.0812515	0.157494	1.23446e-05	1.52335	0.146	0.045	0.273259
Trp53inp1	0.291011	0.317715	0.399796	0	0.153382	0.297563	1.27069e-05	0.743878	0.187	0.071	0.281281
Gm26532	0.142413	0.845193	0.753613	0	0.949376	1.18846	1.27078e-05	-0.878398	0.275	0.405	0.281299
Smg6	0.566242	0.549116	0.735555	0	0.318639	0.557888	1.28237e-05	0.714145	0.322	0.174	0.283866
4933406I18Rik	0.518058	0.560826	0.643241	0	0.330566	0.337131	1.29263e-05	1.03635	0.264	0.132	0.286136
Selenow	1.51741	1.37787	1.31364	1.44368	1.81344	1.57889	1.48706e-05	-0.616616	0.676	0.714	0.329175
Alg2	0.349676	0.216919	0.123323	0	0.0599743	0.040227	1.49923e-05	1.99078	0.094	0.016	0.331869
Rasgrp3	0.654083	0.853961	0.754926	0	0.533367	0.640256	1.50762e-05	0.557129	0.348	0.19	0.333726
Ankrd12	0.871034	0.776579	0.807028	0	0.636144	0.511733	1.52049e-05	0.667303	0.408	0.238	0.336576
Gabarap	2.0908	2.02606	2.10282	2.51178	2.20346	2.34724	1.57491e-05	-0.328576	0.903	0.913	0.348622
Fbxo11	1.20903	1.18421	1.12121	0	0.962127	0.892296	1.58071e-05	0.514134	0.554	0.37	0.349907
Cxcr4	0.928003	1.27109	0.848101	0.962458	0.711163	0.686937	1.61335e-05	0.820958	0.363	0.215	0.357132
Rbm26	0.537865	0.742861	0.967143	0	0.511269	0.749108	1.66634e-05	0.557854	0.429	0.251	0.368861
Aldh2	1.46938	1.15957	1.19646	2.20724	1.43382	1.6133	1.69842e-05	-0.569537	0.597	0.678	0.375962
Pan3	0.729694	0.997497	1.07936	0.962458	0.668845	0.772012	1.71119e-05	0.70396	0.496	0.328	0.378788
Mtdh	1.12666	1.1482	1.03698	0.962458	0.792119	0.931725	1.81302e-05	0.529728	0.532	0.354	0.401331
Ms4a6d	1.56347	1.22184	1.44283	0	1.24143	1.09777	1.83089e-05	0.439431	0.674	0.502	0.405286
Frs2	0.25884	0.291463	0.437173	0	0.218088	0.182086	1.83808e-05	0.957834	0.18	0.068	0.406878
Abr	0.469341	0.448413	0.515	0	0.308294	0.281981	1.86147e-05	0.855433	0.24	0.113	0.412055
Lrch1	0.530525	0.68864	0.843403	0	0.443472	0.642143	1.92401e-05	0.616002	0.378	0.212	0.425898
Neat1	2.6618	2.36998	2.12374	3.35019	1.89857	2.22076	2.07128e-05	0.388276	0.867	0.81	0.458498
Ythdf3	1.02206	0.886984	0.859143	1.44368	0.636148	0.771178	2.11657e-05	0.493978	0.485	0.302	0.468523
Bcap29	0.399632	0.326945	0.308896	0	0.147958	0.183103	2.14276e-05	1.11029	0.167	0.061	0.47432
Enox2	1.03424	0.862055	0.955054	0	0.650982	0.752593	2.16441e-05	0.612455	0.446	0.273	0.479115
Inpp5d	1.60177	1.21115	1.58591	0.962458	1.11857	1.33174	2.22651e-05	0.479518	0.721	0.511	0.49286
Angptl4	0.0651646	0.146899	0.322463	0	0.0582423	0.0382722	2.22847e-05	2.27057	0.097	0.019	0.493294
Tspo	1.17828	1.46558	1.33993	0	1.24479	1.13146	2.33038e-05	0.346537	0.657	0.486	0.515854
Gm48099	0.914292	0.103788	0.119206	0	0.0204707	0.0289329	2.37523e-05	3.60139	0.077	0.01	0.525781
Foxo3	0.748176	0.57273	0.707369	0	0.435314	0.56589	2.45687e-05	0.552843	0.352	0.196	0.543852
Cd83	1.81704	2.19729	1.69545	2.7449	2.20187	2.37916	2.64207e-05	-0.618362	0.745	0.791	0.58485
Dusp6	0.662335	1.0787	1.38102	0	0.652177	1.23926	2.68527e-05	0.467148	0.476	0.318	0.594411
Irgm1	0.49079	0.154153	0.169423	0.962458	0.624257	0.325079	2.70936e-05	-1.34512	0.094	0.193	0.599744
Pfkfb3	0.768841	0.708862	0.497352	0	0.503401	0.273204	2.71459e-05	0.813243	0.3	0.161	0.600901
Mpp7	0.588878	0.602059	0.502016	0.962458	0.304711	0.212443	2.80557e-05	1.27236	0.208	0.093	0.62104
Jaml	0.0400327	0.107506	0.185752	0	0.0119384	0	2.89419e-05	3.98392	0.062	0.003	0.640658
Gpcpd1	0.953777	1.05475	0.990053	0	0.755565	0.748211	2.90945e-05	0.635471	0.476	0.312	0.644037
Abcg1	0.544148	0.616816	0.715385	0	0.477753	0.396253	2.99839e-05	0.748656	0.268	0.135	0.663724
Eif3c	0.804599	0.682979	0.712634	0.962458	0.544321	0.53973	3.0751e-05	0.535445	0.391	0.228	0.680704
Sin3a	0.239948	0.290453	0.432871	0	0.136487	0.218758	3.0976e-05	1.12821	0.172	0.068	0.685686
Adipor2	0.74566	0.64944	0.701969	0	0.70388	0.344784	3.2806e-05	0.456477	0.363	0.209	0.726194
Actb	4.15555	4.3167	4.32039	4.23354	4.44114	4.44358	3.28225e-05	-0.214919	1	1	0.726558
Gtdc1	0.931455	0.673448	0.771605	0	0.518131	0.573132	3.31988e-05	0.669417	0.356	0.206	0.73489
Cd209d	0.464835	0.351801	0.260771	0	0.811132	0.659715	3.51962e-05	-1.49219	0.054	0.138	0.779103
Crybg3	0.554583	0.604665	0.591605	0	0.341717	0.503069	3.54311e-05	0.611538	0.303	0.161	0.784303
Dnajb9	0.978548	1.00354	1.007	0	0.832275	0.804457	3.55164e-05	0.444176	0.464	0.296	0.78619
Ogfrl1	0.937919	0.691761	0.878397	0	0.66148	0.566104	3.59882e-05	0.596215	0.397	0.232	0.796636
Soat1	0.960667	0.888954	0.733709	0	0.598184	0.662384	3.67674e-05	0.557538	0.438	0.26	0.813883
Elf2	1.17349	0.878287	0.958052	0.962458	0.810753	0.700283	3.67864e-05	0.522565	0.509	0.338	0.814305
Fxyd2	1.70635	2.21923	1.79033	2.84382	1.62384	1.67753	3.69347e-05	0.507047	0.736	0.588	0.817586
Mndal	1.07	0.759021	0.725293	0.962458	1.40417	0.966424	3.74889e-05	-0.952135	0.393	0.476	0.829854
Ston1	0.0575976	0.149002	0.22834	0	0.0807194	0	3.84822e-05	2.06048	0.082	0.013	0.851842
Chchd2	1.76131	1.99451	1.84512	0.962458	2.24261	2.05442	3.95779e-05	-0.442585	0.848	0.846	0.876097
Plin2	2.09484	1.90426	1.89263	0.962458	1.76302	1.60757	3.98111e-05	0.417858	0.809	0.733	0.881258
Snapin	0.484606	0.33505	0.531387	0	0.244924	0.250938	4.06907e-05	1.04477	0.227	0.109	0.900729
Ifit1	0.0659017	0.0388053	0.0411488	0	0.443824	0.10252	4.20527e-05	-2.85255	0.013	0.068	0.930878
Mertk	1.41532	1.10409	1.34138	0.962458	0.915996	1.16482	4.24037e-05	0.490853	0.614	0.434	0.938649
Scaf8	0.220904	0.439191	0.450964	0	0.158282	0.341238	4.33912e-05	0.838595	0.204	0.09	0.960507
Zfp608	0.404829	0.482671	0.482875	0	0.220719	0.335566	4.40287e-05	0.903497	0.208	0.093	0.974619
Macf1	1.27564	1.09797	1.30129	0	1.029	1.01931	4.46014e-05	0.443902	0.605	0.418	0.987297
Selenop	4.41276	3.97137	3.95386	4.55231	3.79765	3.90176	4.50297e-05	0.287237	1	0.99	0.996776
0610009B22Rik	0.146717	0.202291	0.129941	0	0.1288	0.180779	0.576307	0.036526	0.079	0.068	1
0610009E02Rik	0	0.0130597	0.0182149	0	0.00854852	0	0.241359	1.04765	0.011	0.003	1
0610009L18Rik	0.338986	0.226399	0.135683	0.962458	0.0929357	0.139533	0.0381353	0.792831	0.092	0.051	1
0610010F05Rik	0.3399	0.217335	0.206808	0	0.353912	0.26022	0.467649	-0.46613	0.129	0.141	1
0610010K14Rik	0.39803	0.491814	0.460131	0	0.505728	0.574805	0.463111	-0.28239	0.24	0.248	1
0610012G03Rik	0.732443	0.742522	0.570242	0.962458	0.748946	0.760202	0.376754	-0.27226	0.358	0.354	1
0610030E20Rik	0.157308	0.290697	0.22602	0	0.166164	0.260807	0.0431157	0.180049	0.127	0.077	1
0610040B10Rik	0.0704477	0.0744115	0.136183	0	0.108214	0.211109	0.68723	-0.641184	0.043	0.048	1
0610040J01Rik	0.143827	0.180394	0.241991	0	0.207673	0.217091	0.519296	-0.0522761	0.09	0.074	1
0610043K17Rik	0.107504	0.0369769	0.11872	0	0.0537297	0.0876336	0.271248	0.330351	0.041	0.026	1
1010001B22Rik	0.0170016	0.0100861	0.0120073	0	0	0.0518249	0.612348	-1.00846	0.006	0.01	1
1110002J07Rik	0.0151067	0.00796477	0.0286611	0	0.029083	0	0.535299	0.234757	0.011	0.006	1
1110002L01Rik	0.0566858	0.0665731	0.0374823	0	0.0342214	0.0347623	0.385031	0.506678	0.021	0.013	1
1110004F10Rik	0.560014	0.510223	0.644383	0.962458	0.807271	0.542602	0.640351	-0.316476	0.309	0.26	1
1110008P14Rik	0.283047	0.236327	0.289412	0	0.224656	0.217533	0.231522	0.320885	0.112	0.084	1
1110012L19Rik	0.219482	0.108632	0.0872171	0	0.127399	0.0572265	0.217604	0.312111	0.047	0.029	1
1110019D14Rik	0.0712387	0.0787122	0.171764	0	0.141829	0.122653	0.883126	-0.102808	0.058	0.055	1
1110020A21Rik	0	0.00506618	0.0111785	0	0.0863026	0.0116708	0.610839	-2.5481	0.006	0.01	1
1110032A03Rik	0.114324	0.174158	0.110266	0	0.162235	0.108972	0.53449	-0.0406709	0.082	0.068	1
1110035H17Rik	0.0313087	0.0198928	0.0294247	0	0	0.0323901	0.388167	0.597935	0.013	0.006	1
1110038B12Rik	0.244518	0.416626	0.517813	0	0.463219	0.387338	0.511769	0.0679512	0.202	0.174	1
1110038F14Rik	0.121499	0.185357	0.248001	0	0.342726	0.419909	0.0497244	-1.00244	0.103	0.145	1
1110046J04Rik	0.0635996	0.0785654	0.0448612	0	0.0517821	0.015199	0.0241222	0.747646	0.03	0.006	1
1110051M20Rik	0.1342	0.147549	0.291201	0.962458	0.135633	0.144207	0.47759	0.643	0.077	0.064	1
1110059E24Rik	0.177093	0.279856	0.175049	0	0.214788	0.172397	0.391396	0.143102	0.103	0.084	1
1110059G10Rik	0.349846	0.150904	0.243989	0	0.258322	0.200496	0.0762541	-0.00281294	0.131	0.084	1
1110065P20Rik	0.180825	0.163521	0.18128	0	0.134957	0.14192	0.0475053	0.356345	0.092	0.051	1
1190005I06Rik	0	0.0419326	0.0453788	0	0.0477858	0.00901354	0.384256	0.285696	0.021	0.013	1
1190007I07Rik	0.221799	0.238217	0.105488	0	0.185197	0.236325	0.325266	-0.313078	0.067	0.084	1
1200007C13Rik	0.0944488	0.0236638	0.129456	0	0.120185	0.0109662	0.77399	0.343174	0.026	0.023	1
1300002E11Rik	0.03618	0.109134	0.0539461	0	0.0555054	0.0861312	0.44311	-0.00749527	0.032	0.023	1
1500002C15Rik	0.0256264	0	0.156042	0	0.256551	0.0782598	0.641582	-1.11214	0.015	0.019	1
1500004A13Rik	0.0534781	0.0675431	0.106821	0	0.0352511	0	0.0013817	2.06528	0.047	0.006	1
1500009L16Rik	0	0	0.0182425	0	0.0110226	0.0179345	0.362602	-0.65674	0.004	0.01	1
1500011B03Rik	0.151795	0.255493	0.290281	0	0.29464	0.12952	0.102307	0.263428	0.122	0.084	1
1500015A07Rik	0.0461704	0.0691805	0.123584	0	0.140391	0.200941	0.720637	-0.920926	0.041	0.045	1
1500015L24Rik	0	0.0170152	0.0642878	0	0	0	0.0672115	3.66471	0.011	0	1
1600002D24Rik	0.126889	0.0373876	0.0334101	0	0.0092631	0.0550327	0.153714	0.604328	0.024	0.01	1
1600002K03Rik	0.15359	0.219552	0.205414	0	0.204616	0.243243	0.978413	-0.159094	0.103	0.1	1
1600010M07Rik	0.333391	0.280119	0.283634	0.962458	0.283677	0.385254	0.685521	-0.251591	0.139	0.122	1
1600012H06Rik	0.406644	0.178241	0.22024	0	0.142433	0.207464	0.108344	0.48922	0.103	0.068	1
1600014C10Rik	0.0964555	0.0914865	0.0604922	0	0.210197	0.109309	0.825519	-1.12177	0.043	0.045	1
1600020E01Rik	0.335755	0.311918	0.275611	0	0.189645	0.201058	0.0330042	0.680536	0.131	0.08	1
1600022D10Rik	0.0202167	0.0343068	0.0158345	0	0	0	0.0672115	2.98404	0.011	0	1
1700001L05Rik	0.0402915	0.0152674	0.0380474	0	0	0	0.030099	3.36433	0.015	0	1
1700003F12Rik	0.0471274	0.146893	0.0124256	0	0.0866104	0.0699809	0.429702	-0.248847	0.036	0.026	1
1700006J14Rik	0.0872452	0.0329833	0.0105128	0	0.0476057	0	0.522719	0.245348	0.015	0.01	1
1700007L15Rik	0	0.0464565	0.0309092	0	0	0	0.0137934	3.41115	0.019	0	1
1700008J07Rik	0.0619145	0.00893447	0.0260391	0	0.0345085	0.0808596	0.397864	-1.12444	0.017	0.026	1
1700010K24Rik	0.0342933	0.0373978	0.0652149	0	0.21245	0	0.395023	-1.20732	0.017	0.01	1
1700012D14Rik	0.109122	0.0857479	0.111494	0	0.0960539	0.0557089	0.0679427	0.407777	0.054	0.026	1
1700016G22Rik	0.0211667	0.0279069	0.0262565	0	0.012512	0.0419571	0.787684	-0.0904181	0.011	0.013	1
1700016P03Rik	0.188628	0.174228	0.132661	0	0.0542533	0	0.000317906	2.42581	0.062	0.01	1
1700017B05Rik	0.423692	0.570723	0.542165	0	0.418187	0.357856	0.00154516	0.568791	0.247	0.145	1
1700019L13Rik	0.0591958	0.0605332	0.041047	0	0.0889569	0.11487	0.643114	-1.01708	0.032	0.026	1
1700021F05Rik	0.0783934	0.132894	0.138418	0	0.0678053	0.138025	0.0211567	0.315617	0.077	0.035	1
1700023H06Rik	0	0.0574418	0.0618528	0	0	0.027298	0.0520712	1.70984	0.019	0.003	1
1700025G04Rik	0.117174	0.150158	0.166122	0	0.0919439	0.086222	0.0906286	0.799012	0.071	0.042	1
1700028E10Rik	0.0314003	0.0578982	0.110576	0	0.138834	0.060363	0.567853	-0.361207	0.041	0.032	1
1700030J22Rik	0.0224353	0.00633343	0.0327225	0	0	0	0.0448077	2.91892	0.013	0	1
1700030K09Rik	0.0543054	0.0238442	0.0686616	0	0	0.00990107	0.0164554	2.76225	0.026	0.003	1
1700030N03Rik	0	0.0282504	0.0322354	0	0	0	0.0672115	3.13606	0.011	0	1
1700034P13Rik	0.0202167	0.229636	0.0676618	0	0.626356	0.556913	0.108499	-2.63966	0.011	0.026	1
1700037C18Rik	0.0233341	0.0707874	0.0452499	0	0.105161	0.0161567	0.571897	-0.327134	0.026	0.019	1
1700037H04Rik	0.187476	0.124439	0.101847	0	0.101974	0.151474	0.162603	-0.0361588	0.067	0.042	1
1700045H11Rik	0.0531613	0.0522249	0.00507013	0	0	0	0.0137934	3.31801	0.019	0	1
1700052K11Rik	0.0173309	0.0247058	0.0193905	0	0.041115	0	0.386119	-0.09094	0.013	0.006	1
1700064H15Rik	0	0.090427	0.0357657	0	0.0928237	0.095744	0.81347	-0.936603	0.015	0.013	1
1700066B17Rik	0.0167612	0.0187745	0.0440396	0	0.0139838	0.0486705	0.908231	-0.0394441	0.017	0.016	1
1700066B19Rik	0	0.0673895	0.0578855	0	0	0	0.0203323	4.11758	0.017	0	1
1700066M21Rik	0.0445077	0.0486729	0.054494	0	0.0103594	0.0811248	0.379582	0.13956	0.026	0.016	1
1700084C06Rik	0.0703537	0.0036283	0.010285	0	0	0	0.0448077	2.64211	0.013	0	1
1700086O06Rik	0.0205518	0.0419731	0.0327035	0	0.0127131	0.0123634	0.195598	1.21897	0.017	0.006	1
1700094D03Rik	0.0268425	0.0264281	0.0310679	0	0.0331931	0.0934333	0.43321	-1.11359	0.015	0.023	1
1700096K18Rik	0.0869636	0.106454	0.12366	0	0.0745784	0.051185	0.0273931	0.81797	0.056	0.023	1
1700109H08Rik	0.0151067	0.0381316	0.0499999	0	0.0878057	0.0651345	0.629633	-0.935078	0.024	0.029	1
1700110K17Rik	0.0390646	0.020936	0.0474357	0	0	0	0.00938836	3.62768	0.021	0	1
1700113A16Rik	0.245367	0.0417776	0.111653	0	0.0484307	0.0811619	0.107621	0.778765	0.045	0.023	1
1700120C14Rik	0.0288427	0.0161549	0.0201402	0	0.0257027	0.106937	0.337831	-1.65967	0.009	0.016	1
1700123M08Rik	0	0.0237929	0.0393839	0	0.0169461	0.0597795	0.926876	-0.461023	0.017	0.016	1
1700123O20Rik	0.169332	0.217405	0.267937	0	0.194403	0.182848	0.123677	0.345916	0.12	0.084	1
1700126G02Rik	0.0813637	0.0099005	0.0607459	0	0.109312	0.0604949	0.85739	-0.894892	0.021	0.019	1
1810009A15Rik	0.0157898	0.0376807	0.0316113	0	0.0310023	0.0739691	0.759189	-0.736077	0.019	0.016	1
1810013L24Rik	1.00298	0.80037	0.785671	0.962458	0.72433	0.898561	0.361408	0.0386917	0.399	0.35	1
1810019D21Rik	0	0.049661	0.00851761	0	0.020219	0.0614934	0.195038	-0.875201	0.006	0.016	1
1810019N24Rik	0.0486897	0	0.00374582	0	0.0275109	0.0147615	0.610839	-1.05415	0.006	0.01	1
1810021B22Rik	0.0311356	0.0133963	0.0197615	0	0.0329049	0.0548236	0.193116	-1.13392	0.006	0.016	1
1810024B03Rik	0.0695657	0.0312074	0.097406	0	0.061414	0.0459873	0.13634	0.357496	0.039	0.019	1
1810026B05Rik	0.433109	0.548588	0.575832	0	0.618207	0.611676	0.740475	-0.226962	0.277	0.248	1
1810030O07Rik	0.416519	0.348716	0.378465	0.962458	0.286321	0.346908	0.0220341	0.267562	0.167	0.103	1
1810034E14Rik	0.0384932	0.0630962	0.0627443	0	0.0970209	0.0744504	0.970205	-0.560935	0.032	0.032	1
1810044D09Rik	0.0164791	0.0883276	0.0419066	0	0.0154965	0.105106	0.454046	-0.1549	0.028	0.019	1
1810055G02Rik	0.0374791	0.0490767	0.0172276	0	0.0318001	0.0158948	0.391488	0.317175	0.017	0.01	1
1810058I24Rik	0.729982	0.688325	0.68128	0	0.853961	0.647338	0.542449	-0.185668	0.371	0.315	1
1810062O18Rik	0.0444559	0.0212244	0.0635422	0	0.0392853	0.0565213	0.574454	-0.0791057	0.026	0.019	1
2010001A14Rik	0	0.0232369	0.0652495	0	0.0670437	0.0592029	0.904187	-0.65091	0.021	0.023	1
2010013B24Rik	0.116584	0.176043	0.276516	0	0.138028	0.140084	0.111411	0.693557	0.097	0.064	1
2010315B03Rik	0.0666517	0.128139	0.101712	0	0.086324	0.173252	0.344989	-0.311034	0.062	0.045	1
2010320M18Rik	0.109998	0.101607	0.0652213	0	0.0284444	0.0428306	0.0412105	1.21846	0.047	0.019	1
2200002D01Rik	0	0.0258835	0.0598423	0	0	0	0.0448077	3.6943	0.013	0	1
2210016F16Rik	0.28238	0.379789	0.276394	0	0.502182	0.44135	0.0607312	-0.704972	0.148	0.19	1
2210016L21Rik	0.301262	0.209726	0.182966	0	0.121995	0.200296	0.161201	0.429354	0.101	0.071	1
2210408F21Rik	0.300714	0.214638	0.267599	0	0.144759	0.191177	0.00765655	0.660612	0.122	0.061	1
2210408I21Rik	0.296928	0.353965	0.351746	0	0.24961	0.195323	0.00199898	0.705486	0.139	0.068	1
2300009A05Rik	0.217824	0.186714	0.239183	0	0.198426	0.194204	0.0797589	0.160731	0.107	0.068	1
2310001H17Rik	0.535704	0.488082	0.379432	0	0.63485	0.648608	0.0969559	-0.680108	0.204	0.244	1
2310009A05Rik	0.2882	0.364918	0.285336	0	0.347668	0.318334	0.315937	-0.0990385	0.165	0.132	1
2310009B15Rik	0.104178	0.119853	0.146302	0	0.15328	0.0946017	0.0857913	0.0544957	0.082	0.048	1
2310010J17Rik	0.140915	0.236772	0.166026	1.44368	0.230048	0.182073	0.68116	-0.221865	0.099	0.087	1
2310011J03Rik	0.242207	0.329081	0.37722	0.962458	0.474532	0.316734	0.987376	-0.297983	0.157	0.151	1
2310015A10Rik	0.178206	0.141133	0.118119	0	0.0798671	0.0906575	0.00459344	0.687295	0.079	0.029	1
2310022A10Rik	0.216835	0.129385	0.130583	0	0.197237	0.061062	0.465992	0.111444	0.069	0.055	1
2310022B05Rik	0.109601	0.128794	0.162068	0	0.215913	0.176042	0.822777	-0.504752	0.067	0.061	1
2310033P09Rik	0.272676	0.200558	0.217577	0	0.249792	0.194669	0.47825	-0.0218632	0.109	0.09	1
2310039H08Rik	0.104	0.144246	0.150618	0	0.125918	0.055694	0.0640616	0.621972	0.075	0.042	1
2310040G24Rik	0.0554615	0.0746855	0.0509596	0	0.0787398	0.0886666	0.907055	-0.49275	0.034	0.032	1
2310057M21Rik	0.0505673	0.0983939	0.0918737	0	0.117987	0.0300179	0.495288	0.188563	0.034	0.026	1
2310058D17Rik	0.175725	0.070509	0.0600254	0	0.0149766	0.0158948	0.00566084	2.24392	0.039	0.006	1
2310061I04Rik	0.107343	0.0735623	0.154226	0	0.0881241	0.0358425	0.12979	0.916911	0.052	0.029	1
2410002F23Rik	0.0543168	0.110003	0.12358	0	0.124587	0.17368	0.708759	-0.486344	0.056	0.061	1
2410004B18Rik	0.0997969	0.109856	0.129054	0	0.196457	0.290355	0.0292853	-1.12572	0.064	0.106	1
2410006H16Rik	1.04559	1.41044	1.47296	2.01123	1.5661	1.64584	0.00308648	-0.397184	0.603	0.646	1
2410022M11Rik	0	0.145905	0.0943337	0	0.0428391	0.0889666	0.0758326	0.582113	0.043	0.019	1
2410080I02Rik	0.0170123	0.0225603	0.0501233	0	0.0232331	0.00716361	0.0973219	1.02134	0.021	0.006	1
2410131K14Rik	0.0584602	0.0766955	0.0791856	0	0.0990772	0.0857886	0.990688	-0.320447	0.043	0.042	1
2500002B13Rik	0.0278672	0.0646377	0.0118104	0	0	0.071798	0.140722	-0.126763	0.019	0.006	1
2510002D24Rik	0.264138	0.0487132	0.136528	0	0.108635	0.118624	0.296607	0.181614	0.06	0.042	1
2510009E07Rik	0.369613	0.250635	0.384977	0	0.151152	0.257911	0.000194416	0.816948	0.157	0.064	1
2510039O18Rik	0.495201	0.334116	0.411449	0	0.564094	0.249172	0.0143598	-0.103854	0.24	0.148	1
2510046G10Rik	0.0446128	0.0336579	0.0383001	0	0.125064	0.00716361	0.908231	-0.891417	0.017	0.016	1
2610001J05Rik	0.602449	0.745103	0.651445	1.76719	0.716224	0.787434	0.458547	-0.224011	0.367	0.305	1
2610002M06Rik	0.149939	0.181493	0.15528	0	0.100442	0.21479	0.240622	0.0560322	0.086	0.061	1
2610008E11Rik	0.0794533	0.118509	0.148367	0	0.0644311	0.0754988	0.049605	0.873135	0.064	0.032	1
2610020C07Rik	0.0539361	0.0172987	0.0244938	0	0.0465645	0.0214575	0.900934	-0.38585	0.015	0.016	1
2610021A01Rik	0	0.011849	0.0577872	0	0.0136816	0.0998902	0.646249	-0.778268	0.017	0.013	1
2610035D17Rik	0.305259	0.205856	0.287705	0.962458	0.208179	0.362626	0.407074	-0.160874	0.116	0.093	1
2610037D02Rik	0.27333	0.275929	0.190223	0	0.320246	0.307803	0.623757	-0.480062	0.131	0.113	1
2610044O15Rik8	0.0360636	0.0254077	0.0332043	0	0.0241877	0.0636341	0.754881	-0.500787	0.019	0.016	1
2610203C22Rik	0.594836	0.604514	0.727456	0	0.532184	0.596014	0.0479846	0.322255	0.307	0.225	1
2610301B20Rik	0.0306516	0.105417	0.0845798	0	0.0302412	0.226538	0.691148	-0.664724	0.036	0.042	1
2610307P16Rik	0.0400327	0.00835186	0.0629254	0	0	0.0152372	0.241359	2.03351	0.011	0.003	1
2610507B11Rik	1.22289	0.939166	1.14422	0	0.930479	1.16267	0.13876	0.0946408	0.524	0.434	1
2610507I01Rik	0.0449974	0.0523475	0.0163171	0	0.0197048	0.0401798	0.90474	0.129066	0.017	0.016	1
2700038G22Rik	0.0440357	0.0396212	0.0689395	0	0.0646974	0.0440309	0.454046	-0.0197571	0.028	0.019	1
2700046G09Rik	0.0157898	0.0256279	0.0439633	0	0.0548634	0	0.519463	0.153167	0.015	0.01	1
2700049A03Rik	0.144635	0.151822	0.100232	0	0.0939775	0.0934988	0.200967	0.426841	0.06	0.039	1
2700062C07Rik	0.0713406	0.122349	0.0835684	0	0.0678249	0.0513339	0.0620037	0.659617	0.049	0.023	1
2700081O15Rik	0.0674657	0.0192182	0.0979449	0	0.0382686	0.0308366	0.28246	0.878623	0.028	0.016	1
2700097O09Rik	0.0430351	0.0953447	0.0719231	0	0.0915543	0.115857	0.638024	-0.468903	0.039	0.045	1
2810001G20Rik	0.17513	0.0305659	0.00690644	0	0.0317808	0.133261	0.249701	-0.920426	0.019	0.032	1
2810002D19Rik	0.0207379	0.0447083	0.0497196	0	0.0521247	0.0569061	0.558891	-0.342603	0.019	0.026	1
2810004N23Rik	0.254278	0.194208	0.320357	0	0.253994	0.158417	0.0542222	0.394786	0.116	0.071	1
2810006K23Rik	0.0311356	0.0587316	0.0452036	0	0.0459171	0	0.212782	0.898315	0.026	0.013	1
2810013P06Rik	0.48711	0.428738	0.536298	0	0.460611	0.570151	0.436582	-0.0815273	0.234	0.196	1
2810021J22Rik	0.0225251	0.0369908	0.00838352	0	0.0949889	0.0375349	0.701407	-1.65973	0.013	0.016	1
2810402E24Rik	0.038488	0.0380584	0.0708182	0	0.0189271	0.0790071	0.295388	0.138535	0.032	0.019	1
2810403D21Rik	0.197151	0.135592	0.20175	0	0.0507756	0.0904596	0.0481102	1.38319	0.06	0.029	1
2810408I11Rik	0.10311	0.0106328	0.0287237	0	0.0174652	0.0122206	0.283276	1.04033	0.019	0.01	1
2810454H06Rik	0.0303114	0.213755	0.0859174	0	0.200344	0.230459	0.486856	-0.849633	0.06	0.071	1
2900005J15Rik	0.112144	0.0315995	0.0413733	0	0.0734753	0.0685563	0.583016	-0.533159	0.026	0.019	1
2900009J06Rik	0	0.0102358	0.0502951	0	0	0.0182287	0.163811	1.36299	0.013	0.003	1
2900026A02Rik	0.059754	0.0961415	0.0477828	0	0.098323	0.0562105	0.355527	-0.241435	0.034	0.023	1
2900052L18Rik	0.0387081	0.0411035	0.0591495	0	0.0219231	0.0239838	0.286293	1.01041	0.024	0.013	1
2900060B14Rik	0.0157898	0.0652996	0.108106	0	0.1265	0.201924	0.131148	-1.09713	0.039	0.061	1
2900076A07Rik	0.0665704	0.0926916	0.177667	0	0.0719225	0.101122	0.132726	0.618096	0.056	0.032	1
2900089D17Rik	0.338189	0.266877	0.295824	0	0.195555	0.286415	0.106591	0.31914	0.142	0.096	1
2900093K20Rik	0.167183	0.135272	0.203107	0	0.171064	0.119598	0.281968	0.261603	0.071	0.051	1
2900097C17Rik	0.908809	0.792685	0.70855	0	0.869328	0.808569	0.712697	-0.173554	0.38	0.36	1
3110001I22Rik	0	0.0811313	0.0113053	0	0.0555865	0.0118513	0.503115	-0.0411191	0.019	0.013	1
3110009E18Rik	0.0947958	0.0530982	0.0257342	0	0.0887101	0.0888709	0.921176	-0.942751	0.034	0.032	1
3110040N11Rik	0.0488496	0.0989499	0.029091	0	0.131972	0.11214	0.250029	-1.12528	0.03	0.045	1
3110056K07Rik	0.157983	0.151645	0.288971	0	0.16665	0.0711645	0.0060657	0.927665	0.105	0.048	1
3110082I17Rik	0.335229	0.360963	0.409958	0	0.244073	0.315523	0.19412	0.524189	0.161	0.125	1
3222401L13Rik	0.0429673	0.0718567	0.0562285	0	0.10486	0.170341	0.543534	-1.23461	0.034	0.042	1
3300002A11Rik	0	0.0354883	0	0	0.0178768	0.0433465	0.610839	-1.1958	0.006	0.01	1
3300002I08Rik	0.084045	0.0745329	0.100955	0	0.0649261	0.0534649	0.255064	0.570131	0.045	0.029	1
3830403N18Rik	0.102649	0.0400435	0.0555857	0	0.0313783	0.047343	0.494725	0.520827	0.019	0.013	1
3830406C13Rik	0.214315	0.165237	0.210103	0.962458	0.416079	0.231849	0.257329	-0.875762	0.092	0.116	1
3830408C21Rik	0.0404293	0	0.0109512	0	0.00778311	0.0331928	0.872514	-0.736886	0.009	0.01	1
4430402I18Rik	0.0756479	0	0	0	0.0401763	0.0446649	0.181835	-1.66374	0.004	0.013	1
4632404H12Rik	0.0537801	0.0824031	0.0449867	0	0.0799889	0.0141565	0.169384	0.264284	0.032	0.016	1
4632427E13Rik	0.407354	0.435508	0.393865	0	0.230742	0.271475	0.00206904	0.828862	0.185	0.1	1
4732440D04Rik	0.0408721	0.071396	0.0357926	0.962458	0	0.0197226	0.0338691	1.54407	0.028	0.006	1
4732471J01Rik	0.281834	0.107675	0.226878	0	0.188513	0.199643	0.070042	0.0148662	0.105	0.064	1
4833408A19Rik	0	0.0456564	0.00550613	0	0.0289741	0	0.165021	0.209041	0.013	0.003	1
4833411C07Rik	0.121289	0.0348923	0.0487494	0	0.00854852	0.111264	0.226664	-0.111827	0.03	0.016	1
4833417C18Rik	0.0233341	0.0275625	0.0112214	0	0.0345041	0.0186729	0.892396	-0.517411	0.011	0.01	1
4833418N02Rik	0.083819	0.0703408	0.0950426	0	0.0646316	0	0.0139009	1.26882	0.045	0.013	1
4833419F23Rik	0.0728668	0.118184	0.0849187	0.962458	0.231054	0.0619686	0.63779	-0.767914	0.052	0.058	1
4833420G17Rik	0.153807	0.3582	0.281792	0.962458	0.230303	0.182709	0.0413076	0.508991	0.142	0.09	1
4833427F10Rik	0.0473524	0.0675078	0.0247243	0	0.0311086	0.0146415	0.139011	0.808967	0.019	0.006	1
4833438C02Rik	0.189115	0.129059	0.245206	0.962458	0.098318	0.169984	0.0380325	0.543214	0.109	0.064	1
4833439L19Rik	0.592055	0.34453	0.226615	0	0.185246	0.227374	0.000152164	0.789159	0.18	0.08	1
4833445I07Rik	0.168837	0.135293	0.263177	0	0.249549	0.347585	0.850012	-0.603884	0.097	0.096	1
4921511C10Rik	0	0.014425	0.0920333	0	0.0178633	0.039888	0.493797	0.765661	0.019	0.013	1
4921516A02Rik	0.110867	0.035375	0.0293416	0	0.0490439	0.0282824	0.225208	0.16142	0.026	0.013	1
4921524J17Rik	0.244934	0.175225	0.171325	0	0.151094	0.171543	0.167972	0.209017	0.097	0.068	1
4921531C22Rik	0	0.0267407	0.0160026	0	0.0444665	0.0406184	0.627976	-1.25303	0.015	0.019	1
4921536K21Rik	0	0.0198776	0.0174072	0	0.0326869	0.0333166	0.872514	-1.04212	0.009	0.01	1
4930402H24Rik	0.335568	0.294392	0.242477	0.962458	0.28037	0.186816	0.0686038	0.224199	0.146	0.096	1
4930404I05Rik	0.11337	0.109594	0.119019	0	0.0296818	0.0793649	0.0110243	1.08057	0.067	0.026	1
4930405A21Rik	0.0494337	0	0.0537557	0	0.00598704	0	0.0504755	2.56591	0.019	0.003	1
4930414N06Rik	0	0.0460483	0.0460428	0	0	0	0.0448077	3.69989	0.013	0	1
4930430E12Rik	0.385928	0.203836	0.315674	0	0.262598	0.200262	0.0313575	0.354743	0.137	0.084	1
4930430F08Rik	0.104106	0.0330053	0.0555829	0	0.0245662	0.0128297	0.0417187	1.41727	0.032	0.01	1
4930432B10Rik	0.20267	0.00517953	0.0252523	0	0.0386488	0.0308516	0.475954	0.435617	0.024	0.016	1
4930432K21Rik	0	0.0193499	0.0398642	0	0.0164944	0.0118345	0.533987	0.725879	0.011	0.006	1
4930444A19Rik	0.0157898	0.0342312	0.0202708	0	0.0408754	0.0109662	0.276666	-0.156369	0.015	0.006	1
4930445E18Rik	0	0	0.017731	0	0.0347677	0	0.362602	-0.969546	0.004	0.01	1
4930447K03Rik	0	0.00748839	0.0141194	0	0.0350195	0.0706847	0.0885058	-2.27362	0.004	0.016	1
4930453N24Rik	0.281868	0.235345	0.22083	0	0.152085	0.223637	0.0641286	0.362043	0.109	0.068	1
4930455G09Rik	0	0.073378	0.087094	0	0.0271785	0.0292823	0.015485	1.21219	0.039	0.01	1
4930469K13Rik	0.0808345	0.157096	0.106909	0	0.0848537	0.122632	0.558663	0.223995	0.052	0.042	1
4930477G07Rik	0.0708486	0.0112721	0.0104549	0	0	0.0163509	0.243961	1.03833	0.011	0.003	1
4930481A15Rik	0.114019	0.110854	0.0830316	0	0.0823117	0.124688	0.588662	-0.0871072	0.047	0.039	1
4930486L24Rik	0.174237	0.0493289	0.0237021	0	0.0854954	0.0246166	0.754881	0.0161771	0.019	0.016	1
4930503L19Rik	0.111252	0.106793	0.0862182	0	0.125129	0.0916771	0.88176	-0.176438	0.052	0.048	1
4930506C21Rik	0.0507224	0.0556067	0.0667898	0	0.0233984	0.0410145	0.219678	0.854585	0.026	0.013	1
4930509H03Rik	0.0449703	0.0354727	0.0181231	0	0	0	0.030099	3.27234	0.015	0	1
4930511M06Rik	0.279933	0.0701045	0.0653811	0	0.0134722	0.0147615	0.00564023	2.6898	0.039	0.006	1
4930522L14Rik	0.104549	0.0904992	0.0916277	0	0.133786	0.0793287	0.336484	-0.223526	0.043	0.029	1
4930522O17Rik	0.0170123	0.0370368	0.0853654	0	0.0286799	0	0.0985614	1.76636	0.021	0.006	1
4930523C07Rik	0.106086	0.0483864	0.0917628	0	0.0344043	0.0448752	0.070372	0.962348	0.039	0.016	1
4930526L06Rik	0.0866317	0.0125457	0.013217	0	0.0631472	0.0870303	0.18874	-1.55303	0.011	0.023	1
4930532G15Rik	0	0.0388829	0.054533	0	0	0.0208907	0.111276	1.70096	0.015	0.003	1
4930537H20Rik	0.0255634	0.0123894	0.0491111	0	0	0	0.0137934	3.45882	0.019	0	1
4930539J05Rik	0.0541706	0.0474961	0.0722171	0	0.0526897	0.0896454	0.168647	-0.235363	0.019	0.035	1
4930549G23Rik	0.0828855	0.0375548	0.141463	0	0	0.0331534	0.0677436	2.41599	0.024	0.006	1
4930555B11Rik	0.0151067	0.0125213	0.0104822	0	0.0507498	0.075616	0.330781	-2.2624	0.009	0.016	1
4930557K07Rik	0.0292485	0.0621696	0.0130244	0	0.0718254	0.0115235	0.391488	-0.398801	0.017	0.01	1
4930578M01Rik	0.0779443	0.0986195	0.0453009	0	0.0529478	0.0505659	0.289531	0.397713	0.032	0.019	1
4930579G24Rik	0.0237483	0.00694579	0.0263257	0	0	0.00870517	0.163209	1.53304	0.013	0.003	1
4930581F22Rik	0.0390733	0.0305928	0.0551143	0	0.0543029	0.0922038	0.495092	-0.734594	0.021	0.029	1
4930589L23Rik	0.0544768	0.0594106	0.0736654	0	0.0570578	0.0243678	0.281672	0.627477	0.032	0.019	1
4930590L20Rik	0.0173309	0.0102908	0.0162924	0	0	0	0.0672115	2.36915	0.011	0	1
4930593A02Rik	0.132338	0.0183266	0.046773	0	0.0557097	0.0391517	0.689819	0.0722477	0.024	0.019	1
4930595D18Rik	0	0.0174496	0	0	0.0206125	0.0297771	0.357656	-1.77964	0.004	0.01	1
4930599N23Rik	0.0969399	0.0131663	0.111843	0	0.225861	0.133024	0.0997106	-1.31806	0.034	0.058	1
4931406C07Rik	0.406686	0.34275	0.424708	0	0.3753	0.384999	0.163243	0.0633902	0.206	0.158	1
4931406P16Rik	0.295274	0.437932	0.462212	1.76719	0.419279	0.297454	0.0193481	0.244348	0.227	0.148	1
4931414P19Rik	0.0643809	0.0448835	0.018328	0	0.0502993	0.013306	0.806055	0.0637964	0.015	0.013	1
4932422M17Rik	0	0.0119413	0.0607968	0	0	0	0.0672115	3.53033	0.011	0	1
4932438A13Rik	0.525257	0.587308	0.586244	0	0.385474	0.433114	0.000150205	0.628404	0.275	0.148	1
4932438H23Rik	0.0151067	0.040566	0.0121499	0	0	0.0186729	0.243091	1.02549	0.011	0.003	1
4933404O12Rik	0.0263407	0.0437103	0.0106904	0	0.0148591	0.0208189	0.387142	0.373846	0.013	0.006	1
4933406P04Rik	0.0434246	0.0171974	0.0042323	0	0.0311101	0.015199	0.895347	-0.630862	0.011	0.01	1
4933407K13Rik	0.0307482	0	0.0549288	0	0.0720856	0.103909	0.364382	-1.4388	0.019	0.029	1
4933411E08Rik	0.030101	0.0216434	0	0	0.0482056	0.0201678	0.100889	-1.39189	0.006	0.019	1
4933412E12Rik	0.0602027	0.0232317	0.03445	0	0.100235	0.0161567	0.638432	-0.802571	0.015	0.019	1
4933421O10Rik	0.0801347	0.177479	0.206802	0	0.0306468	0.0586714	7.70017e-05	2.02027	0.077	0.013	1
4933423P22Rik	0.0151067	0.0188908	0.0358481	0	0	0	0.0203323	3.18137	0.017	0	1
4933427D06Rik	0	0.00993887	0.0346958	0	0	0	0.0448077	2.83786	0.013	0	1
4933429H19Rik	0.0119236	0.0306096	0.0179502	0	0.00703891	0.0276595	0.683641	0.225502	0.013	0.01	1
4933433G15Rik	0.407392	0.20089	0.233428	0	0.170598	0.145878	0.00332978	0.726647	0.124	0.058	1
4933434E20Rik	0.452779	0.525803	0.460782	0	0.439753	0.256883	0.00229076	0.538798	0.247	0.148	1
4933439C10Rik	0.138416	0.0552226	0.0564322	0	0.0988416	0.0444397	0.180653	-0.0845542	0.041	0.023	1
5031415H12Rik	0.0796498	0.0160871	0.0963626	0	0	0	0.00938836	4.45852	0.021	0	1
5031425E22Rik	0.75786	0.824918	0.842545	0	0.718936	0.809753	0.109514	0.159622	0.397	0.318	1
5031425F14Rik	0.0357661	0.0499962	0.0374711	0	0.116629	0.0955073	0.415692	-1.36815	0.026	0.035	1
5031434O11Rik	0.0370015	0	0.0251295	0	0.0593528	0.0532914	0.1933	-1.56534	0.009	0.019	1
5031439G07Rik	1.13392	0.709415	0.900238	0	1.01419	0.825029	0.952876	-0.107796	0.444	0.408	1
5033421B08Rik	0.905105	0.540108	0.671135	0.962458	0.461498	0.522472	0.00136644	0.577181	0.309	0.196	1
5330438D12Rik	0.0476718	0.0288858	0.0988584	0	0	0.0404783	0.034332	1.62181	0.028	0.006	1
5330439K02Rik	0.0815964	0.0152703	0.029343	0	0.0197231	0	0.192159	1.40539	0.017	0.006	1
5430402O13Rik	0.033719	0.0117447	0.0324858	0	0.0136936	0	0.242224	1.43898	0.011	0.003	1
5430403G16Rik	0.0647292	0.0369854	0.0689937	0	0.0531201	0.0278285	0.289812	0.443377	0.028	0.016	1
5430405H02Rik	0.0710251	0.155043	0.0735868	0	0.090983	0.0923511	0.30733	0.154001	0.052	0.035	1
5430416N02Rik	0.0132571	0.0259227	0.0502279	0	0.0542963	0.0538691	0.688233	-0.596565	0.021	0.026	1
5430427O19Rik	0.177918	0.141033	0.214513	0.962458	0.219609	0.260081	0.48329	-0.449347	0.077	0.09	1
5530601H04Rik	0.158814	0.0556301	0.106867	0	0.091707	0.060722	0.323174	0.341122	0.043	0.029	1
5730405O15Rik	0.015231	0.041463	0.0162894	0	0.0195609	0.0506685	0.875655	-0.485418	0.009	0.01	1
5730409E04Rik	0.0499123	0.0321247	0.149482	0.962458	0.0936178	0.150226	0.538701	-0.44185	0.036	0.045	1
5730455P16Rik	0.111323	0.156315	0.106135	0	0.0676245	0.0858355	0.00863432	0.712131	0.064	0.023	1
5730480H06Rik	0.0941322	0.0908295	0.106916	0	0.024575	0.0955248	0.0236309	0.727016	0.052	0.019	1
5830416I19Rik	0.519984	0.151572	0.149769	0	0.0263612	0.0129948	0.000648442	3.40872	0.058	0.01	1
5830444B04Rik	0.124818	0.0571268	0.0248248	0	0.0245471	0.0855962	0.841801	-0.0733634	0.021	0.019	1
5830448L01Rik	0.0211667	0.0100104	0.0150332	0	0.0386769	0.0293883	0.350874	-1.19881	0.006	0.013	1
5930403N24Rik	0.0453649	0.0424611	0.00725287	0	0.028774	0	0.112116	0.632398	0.015	0.003	1
6030442K20Rik	0.0691582	0.028744	0.0487662	0	0	0	0.00938836	3.9082	0.021	0	1
6030443J06Rik	0.234097	0.0294623	0.0331124	0	0	0.0295279	0.0484865	2.00726	0.026	0.006	1
6030458C11Rik	0.120324	0.122279	0.0979763	0	0.0550883	0.0849404	0.0514027	0.658188	0.06	0.029	1
6230400D17Rik	0.0343665	0.0335515	0.0829357	0	0.0743731	0.00870517	0.432384	0.397837	0.032	0.023	1
6330403L08Rik	0.0653312	0.0522032	0.016836	0	0.0754739	0.0118513	0.841801	-0.303126	0.021	0.019	1
6330408M09Rik	0	0.0264858	0.0294128	0	0	0	0.030099	3.02663	0.015	0	1
6330418K02Rik	0.0440774	0.015546	0.158448	0	0.101553	0.0460865	0.803582	0.292555	0.032	0.029	1
6330562C20Rik	0.0700166	0.0145472	0.0635184	0	0.0545594	0.0699291	0.983396	-0.393225	0.026	0.026	1
6430548M08Rik	0.190532	0.162188	0.21613	0	0.204001	0.206918	0.584291	-0.0963163	0.094	0.08	1
6430590A07Rik	0.0190832	0.0865382	0.0637328	0	0	0.0502342	0.0349464	1.30132	0.039	0.013	1
6530402F18Rik	0.0173398	0.051559	0.0513151	0	0.0417011	0.0152372	0.288101	0.600073	0.019	0.01	1
6720427I07Rik	0.285585	0.498101	0.401311	0	0.435708	0.430117	0.731009	-0.0548021	0.2	0.18	1
6720489N17Rik	0.0292485	0.0297567	0.00374582	0	0.0164881	0.0265654	0.567406	-0.361378	0.009	0.013	1
8030453O22Rik	0.167395	0.0909969	0.0921009	0	0.0449779	0.154254	0.889812	0.0590905	0.041	0.039	1
8030456M14Rik	0.152033	0.00826357	0.0242302	0	0.0439689	0.0161567	0.293781	0.336356	0.024	0.013	1
8030462N17Rik	0.295896	0.288401	0.312612	0	0.253428	0.288096	0.0507675	0.17964	0.15	0.096	1
8430429K09Rik	0.0783888	0.00609435	0.0185819	0	0.0409617	0.0208776	0.39237	-0.400049	0.017	0.01	1
9030025P20Rik	0.121881	0.0205406	0.0423955	0	0.0296204	0.0235855	0.220676	0.763905	0.026	0.013	1
9030407P20Rik	0	0.0200436	0.0482507	0	0	0	0.0448077	3.38194	0.013	0	1
9130221H12Rik	0.0273871	0.0257141	0.0187442	0	0.0462728	0.0251175	0.702589	-0.674673	0.013	0.016	1
9130230L23Rik	0.0481058	0.0711513	0.0317836	0	0.0134722	0.0310383	0.211706	1.02364	0.021	0.01	1
9130230N09Rik	0.0157898	0.0469672	0.0212034	0	0.00804458	0.0362593	0.684934	0.346889	0.013	0.01	1
9130401M01Rik	0.194247	0.09408	0.0778225	0	0.209016	0.142002	0.24797	-0.830187	0.049	0.068	1
9230111E07Rik	0.0586037	0.0242516	0.0371405	0	0.0190707	0.0608872	0.996724	-0.157508	0.019	0.019	1
9230114K14Rik	0.0195413	0.0106222	0.0680736	0	0.0594925	0.0564411	0.600583	-0.524373	0.021	0.016	1
9230116N13Rik	0	0.0151822	0.0124576	0	0	0.0997148	0.895347	-1.97766	0.011	0.01	1
9330020H09Rik	0.0190832	0.163004	0.0913617	0	0.0487878	0.15517	0.483314	0.0546881	0.054	0.042	1
9330136K24Rik	0.0332461	0.0845869	0.0775005	0	0.0801626	0.104906	0.673758	-0.351464	0.03	0.035	1
9330151L19Rik	0	0.034717	0.0357018	0	0	0	0.0448077	3.33131	0.013	0	1
9330159M07Rik	0.0370015	0.0254832	0.0228637	0	0.031068	0.0182287	0.683641	0.0102811	0.013	0.01	1
9330160F10Rik	0.0340284	0.056842	0.0695983	0	0.0140507	0.0379741	0.0307652	1.12311	0.034	0.01	1
9330175E14Rik	0.0151067	0.0231406	0.00813671	0	0.0626121	0.0217353	0.772825	-1.48877	0.011	0.013	1
9430015G10Rik	0.0313331	0.0322516	0.0631654	0	0.054891	0.0746201	0.710803	-0.457142	0.024	0.019	1
9430038I01Rik	0.16764	0.105279	0.185392	0	0.0802253	0.133137	0.0228354	0.565973	0.082	0.039	1
9430041J12Rik	0	0.035369	0.0290955	0	0	0	0.0672115	3.1852	0.011	0	1
9430060I03Rik	0.0165498	0.0137537	0.0680922	0	0	0	0.0137934	3.78315	0.019	0	1
9430091E24Rik	0.0370015	0.0145048	0.0176382	0	0.0229148	0.0129117	0.62448	0.0384661	0.006	0.01	1
9530026P05Rik	0.0151067	0.0333058	0.033119	0	0.0334795	0.0738783	0.710885	-0.808319	0.013	0.016	1
9530052E02Rik	0.0641273	0.131659	0.130346	0	0.128331	0.202883	0.833793	-0.483273	0.062	0.064	1
9530062K07Rik	0.143634	0.190929	0.101699	0	0.145261	0.266713	0.4623	-0.596102	0.069	0.08	1
9530068E07Rik	0.728171	0.666219	0.632032	0	0.70336	0.567496	0.0571073	0.0628896	0.341	0.248	1
9530082P21Rik	0	0.0109287	0.0163137	0	0	0.0380536	0.362602	-0.639596	0.004	0.01	1
9630028I04Rik	0.0640445	0.0247582	0.0216092	0	0.0224729	0	0.112116	1.10881	0.015	0.003	1
9930021J03Rik	0.429251	0.416962	0.500788	0	0.284286	0.430438	0.0273185	0.444534	0.215	0.145	1
9930022D16Rik	0.196506	0.0960972	0.0984278	0	0.0635541	0.0620151	0.0481602	0.85557	0.06	0.029	1
9930104L06Rik	0	0.0823825	0.0611286	0	0.117517	0.0894606	0.843393	-0.832956	0.03	0.032	1
9930111J21Rik1	0.0296334	0.0690217	0	0	0.0135071	0	0.162608	1.64414	0.013	0.003	1
9930111J21Rik2	0.483447	0.398008	0.466068	0.962458	0.449015	0.393424	0.211888	0.0819365	0.219	0.17	1
a	0.022015	0.0263385	0.0465429	0	0.109427	0.0176356	0.649543	-0.891508	0.017	0.013	1
A130010J15Rik	0.0326555	0.041057	0.0378674	0.962458	0.0437939	0.130757	0.110112	-1.26774	0.015	0.032	1
A130077B15Rik	0.0937535	0.0585148	0.0761412	0	0.151633	0.0804694	0.559466	-0.718457	0.034	0.042	1
A230028O05Rik	0.0458766	0	0.00365735	0	0	0.0489298	0.613859	-1.26508	0.006	0.01	1
A230056P14Rik	0.0487808	0.0277661	0.0578147	0	0.0107293	0.050671	0.498444	0.539619	0.019	0.013	1
A230059L01Rik	0.0173309	0.0153052	0.0858306	0	0	0.0734353	0.496583	0.443681	0.019	0.013	1
A230072C01Rik	0.0207922	0.0111512	0.014563	0	0.0255157	0.0824186	0.31519	-1.80239	0.011	0.019	1
A230083G16Rik	0.146104	0.0233112	0.010188	0	0.0153368	0.0560879	0.890921	0.051527	0.011	0.01	1
A230083N12Rik	0	0.00810792	0.067238	0	0	0	0.030099	3.60672	0.015	0	1
A330023F24Rik	0.219037	0.274633	0.274268	0	0.168835	0.17738	0.00139969	0.67966	0.127	0.055	1
A330040F15Rik	0	0.0223662	0.0396661	0	0.0564474	0.0107731	0.902143	-0.355758	0.015	0.016	1
A430005L14Rik	0.257882	0.338875	0.264363	0	0.233048	0.279588	0.202076	0.20489	0.135	0.103	1
A430018G15Rik	0.0611833	0.0148238	0.0810423	0	0.00598704	0	0.0504755	3.22307	0.019	0.003	1
A430033K04Rik	0.0190483	0	0.0402587	0	0.0552138	0.0833818	0.778219	-1.55044	0.011	0.013	1
A430035B10Rik	0	0.0225303	0.0382434	0	0.0396839	0.0183592	0.999333	-0.171943	0.013	0.013	1
A430073D23Rik	0	0.0324567	0.0271837	0	0.0308124	0.0122206	0.517299	0.109051	0.015	0.01	1
A430078I02Rik	0.015231	0	0.0438259	0	0.0377206	0.0456859	0.561102	-0.775723	0.009	0.013	1
A430093F15Rik	0.118789	0.0161549	0.00635838	0	0	0	0.0672115	3.26949	0.011	0	1
A4galt	0.330207	0.225242	0.326901	0	0.465182	0.250464	0.402356	-0.377748	0.122	0.141	1
A530013C23Rik	0.139706	0.108389	0.118772	0	0.0796172	0.0191064	0.00969974	1.21429	0.058	0.019	1
A530017D24Rik	0	0.026843	0.0542145	0	0.0243206	0.0271814	0.384256	0.420414	0.021	0.013	1
A530032D15Rik	0.0207379	0.0264729	0.0126216	0	0.092361	0	0.563619	-1.32872	0.009	0.013	1
A530040E14Rik	0	0.0331111	0	0	0.00598704	0.0371685	0.616886	-0.819521	0.006	0.01	1
A530041M06Rik	0	0.0177528	0.032603	0	0.0377706	0.0489287	0.50976	-0.934616	0.011	0.016	1
A530072M11Rik	0.0308022	0.058758	0.0849027	0.962458	0.0287914	0.0953095	0.589341	0.00301039	0.036	0.029	1
A530088E08Rik	0	0.024713	0.0300492	0	0.0240932	0.0279036	0.887973	-0.183939	0.011	0.01	1
A630001G21Rik	0.290749	0.385099	0.440711	0.962458	0.28845	0.312798	0.026923	0.461034	0.202	0.135	1
A630001O12Rik	0.124716	0.185858	0.16953	0	0.119996	0.179692	0.00922564	0.179699	0.094	0.042	1
A630072M18Rik	0.0972616	0.0686417	0.0381488	0	0.0182517	0.00716361	0.0785462	1.94756	0.028	0.01	1
A630089N07Rik	0.0795547	0.0356935	0.0714327	0	0.0313305	0.0883694	0.620196	0.00543354	0.032	0.026	1
A730017L22Rik	0.0463015	0	0.0241811	0	0	0.0241879	0.243961	0.530387	0.011	0.003	1
A730061H03Rik	0.0380436	0.011707	0.0218812	0	0.0551459	0.0246166	0.700225	-0.930725	0.013	0.016	1
A730063M14Rik	0.0165498	0.0036283	0.0297714	0	0.0571644	0.0173465	0.874084	-1.00297	0.009	0.01	1
A730071L15Rik	0	0	0.0474059	0	0.0251633	0.0208907	0.885025	-0.027714	0.011	0.01	1
A730081D07Rik	0.0513199	0.0449651	0.0540733	0	0.0712202	0.0484942	0.567647	-0.27368	0.026	0.019	1
A930001M01Rik	0	0.0148445	0.030929	0	0	0.0276449	0.279005	0.44702	0.015	0.006	1
A930005H10Rik	0.154848	0.151587	0.0507851	0	0.108125	0.156647	0.763158	-0.365319	0.058	0.051	1
A930006K02Rik	0.0718641	0.041115	0.107982	0	0.00778311	0.00952887	0.00374679	2.83699	0.041	0.006	1
A930007I19Rik	0.247734	0.317148	0.604479	0	0.345279	0.24824	0.00217787	0.736702	0.202	0.116	1
A930015D03Rik	0.235168	0.145316	0.201301	0	0.103083	0.135516	0.0258572	0.692091	0.092	0.048	1
A930033H14Rik	0.0896522	0.0258888	0.0368652	0	0	0	0.00438101	3.79616	0.026	0	1
A930037H05Rik	0	0.00679125	0.010591	0	0.035647	0	0.610839	-1.16477	0.006	0.01	1
AA386476	0.0132571	0.0422364	0.0805889	0	0.0678937	0.0669024	0.909288	-0.263286	0.021	0.023	1
AA388235	0	0.0381896	0.0246433	0	0.0472627	0.00716361	0.998	-0.172486	0.013	0.013	1
AA465934	0.0332461	0.0209416	0.0465762	0	0.0132861	0	0.11044	1.92525	0.015	0.003	1
Aaas	0.0531464	0.107893	0.0712974	0	0.0883985	0.0529337	0.340385	0.176146	0.039	0.026	1
Aacs	0.0821206	0.0333831	0	0	0.0254253	0.0490868	0.897307	-0.560839	0.015	0.016	1
Aagab	0.258548	0.257407	0.270661	0	0.232303	0.343267	0.714132	-0.139241	0.122	0.109	1
Aak1	0.538079	0.498879	0.408761	0	0.350031	0.477577	0.00113128	0.198037	0.232	0.125	1
Aamdc	0.113776	0.200983	0.248196	1.44368	0.245973	0.168188	0.736402	-0.0468792	0.099	0.09	1
Aamp	0.430109	0.71472	0.76263	0.962458	0.896686	0.767199	0.0890687	-0.370339	0.33	0.363	1
Aar2	0.148115	0.178798	0.0999981	0	0.133459	0.129314	0.304543	0.043735	0.071	0.051	1
Aars	0.241804	0.226831	0.290012	0	0.402502	0.297685	0.68528	-0.503969	0.124	0.129	1
Aars2	0.0119236	0.0768201	0.00851761	0	0.0335892	0.0098064	0.38885	0.502441	0.017	0.01	1
Aarsd1	0.0874132	0.146942	0.184166	0	0.235731	0.105407	0.612655	-0.17575	0.075	0.064	1
Aasdh	0	0.0375469	0.0564637	0	0.0440044	0.0593224	0.913371	-0.341296	0.021	0.023	1
Aasdhppt	0.400549	0.15408	0.205138	0	0.285765	0.121231	0.931226	0.0889677	0.077	0.074	1
Aatf	0.0979757	0.210404	0.276225	0	0.243298	0.166774	0.147787	0.143354	0.118	0.084	1
Aatk	0.046084	0.0536207	0.0614196	0	0.096195	0.023423	0.630425	-0.149666	0.032	0.026	1
AB124611	0.488673	0.221491	0.328831	0	0.356543	0.348472	0.599112	-0.159374	0.15	0.132	1
Abca2	0.10734	0.0639274	0.0506556	0	0.101771	0.0236606	0.530956	-0.0231663	0.03	0.023	1
Abca3	0.397556	0.322733	0.298699	0	0.252509	0.209228	0.0335955	0.544569	0.167	0.109	1
Abca5	0	0.0530253	0.0580661	0	0.0145606	0	0.191022	2.23253	0.017	0.006	1
Abca6	0.173404	0.0515548	0.137939	0	0.0806355	0.075773	0.0225403	0.548319	0.067	0.029	1
Abca7	0.12897	0.317803	0.209714	0	0.196027	0.157136	0.0536592	0.454426	0.107	0.064	1
Abca8a	0.015231	0.0555993	0.163016	0	0.116301	0.059758	0.459948	0.211586	0.028	0.019	1
Abca8b	0	0.0072891	0.0224801	0	0.0345179	0.0130584	0.615372	-0.798952	0.006	0.01	1
Abca9	1.42192	1.21677	1.35287	0.962458	1.17495	1.26137	0.0944333	0.204369	0.633	0.55	1
Abcb10	0.0711658	0.0576438	0.0395806	0	0.0840802	0.043871	0.597925	-0.361746	0.026	0.032	1
Abcb1b	0.792402	0.558241	0.787001	0.962458	1.00798	0.849223	0.0844927	-0.569507	0.352	0.37	1
Abcb4	0.100449	0.0722862	0.132697	0	0.170511	0.0688206	0.931659	-0.213708	0.047	0.048	1
Abcb6	0.0588895	0.0705815	0.0256673	0	0.0234013	0.0162473	0.0815182	1.10569	0.028	0.01	1
Abcb7	0.390393	0.30456	0.236067	0	0.218175	0.243695	0.00353836	0.348928	0.157	0.08	1
Abcb8	0.0288427	0.0548623	0.0560367	0	0.0381401	0.0198695	0.217692	0.737401	0.026	0.013	1
Abcc1	0.474537	0.553786	0.579841	0	0.570102	0.779989	0.473998	-0.381268	0.262	0.267	1
Abcc10	0	0.0565522	0.0635427	0	0.00904984	0.0586294	0.219678	0.564366	0.026	0.013	1
Abcc3	0.313298	0.461495	0.625996	0.962458	0.245801	0.445373	0.000801067	0.71489	0.26	0.154	1
Abcc4	0.0794167	0.0760485	0.0955349	0	0.0701899	0.0695527	0.257783	0.290467	0.049	0.032	1
Abcc5	0.246749	0.429161	0.435511	0	0.311473	0.342117	0.0178538	0.372472	0.208	0.135	1
Abcc9	0.0422901	0.0638272	0.0153823	0	0.0489096	0.0376212	0.899724	-0.259462	0.015	0.016	1
Abcd1	0.323946	0.356309	0.49542	0.962458	0.330659	0.411968	0.302717	0.211009	0.21	0.17	1
Abcd2	0.34553	0.151896	0.285381	0.962458	0.186504	0.179676	0.0507007	0.460536	0.131	0.084	1
Abcd3	0.254515	0.223188	0.283776	0	0.228383	0.285383	0.597673	0.0116222	0.129	0.113	1
Abcd4	0.208803	0.230133	0.191263	0	0.074376	0.17642	0.0206766	0.777459	0.094	0.048	1
Abce1	0.354983	0.387232	0.278797	0	0.352186	0.357171	0.860777	-0.12037	0.174	0.158	1
Abcf1	0.684095	0.593181	0.589755	0	0.471875	0.608171	0.0183674	0.22152	0.296	0.203	1
Abcf2	0.201202	0.248518	0.178564	0	0.0980059	0.211644	0.0158043	0.451463	0.116	0.061	1
Abcf3	0.168674	0.145655	0.141091	0	0.190328	0.153942	0.231022	-0.252384	0.079	0.055	1
Abcg2	0.121107	0.151446	0.154172	0	0.17693	0.0610377	0.0811319	0.280318	0.082	0.048	1
Abcg3	0	0.0264339	0.0427165	0	0.0157384	0.0869392	0.902143	-0.74349	0.015	0.016	1
Abhd10	0.0835852	0.0803412	0.106782	0	0.117184	0.0613597	0.260397	0.0426458	0.054	0.035	1
Abhd11	0.0534952	0.200599	0.126708	0	0.140178	0.103669	0.22513	0.216988	0.071	0.048	1
Abhd13	0.132231	0.156482	0.192821	0	0.278092	0.16092	0.30777	-0.422078	0.079	0.058	1
Abhd14a	0.0682442	0.0507259	0.0880752	0	0.150084	0.10424	0.213495	-0.861108	0.036	0.055	1
Abhd14b	0.100537	0.145142	0.19692	0	0.122599	0.209186	0.439025	-0.0159499	0.073	0.058	1
Abhd16a	0.21235	0.242989	0.205568	0	0.296936	0.346741	0.806174	-0.618922	0.131	0.129	1
Abhd17a	0.429582	0.429664	0.383047	0	0.420118	0.43954	0.630866	-0.0930399	0.197	0.177	1
Abhd17b	0.359666	0.337197	0.551546	0	0.370164	0.448402	0.397123	0.17724	0.202	0.174	1
Abhd17c	0.122586	0.082718	0.143747	0	0.0420551	0.126728	0.242627	0.511613	0.054	0.035	1
Abhd18	0.0505178	0.0475355	0.104898	0	0.0176736	0.026689	0.0631386	1.68446	0.034	0.013	1
Abhd2	0.310651	0.199108	0.19537	0	0.133164	0.292661	0.201719	0.0155873	0.105	0.074	1
Abhd3	0.0211667	0.00830775	0.00589487	0	0.0515473	0.0200488	0.610839	-1.82234	0.006	0.01	1
Abhd4	0.416788	0.269136	0.274659	0	0.410006	0.378278	0.311882	-0.482639	0.155	0.122	1
Abhd5	0.152009	0.211856	0.289877	0	0.201871	0.115274	0.00513703	0.639073	0.116	0.055	1
Abhd6	0.0540406	0.087387	0.135023	0	0.11236	0.105065	0.611546	-0.0483058	0.054	0.045	1
Abhd8	0.0383112	0.0211611	0.0336046	0	0.199558	0.0495415	0.0106552	-2.11521	0.015	0.045	1
Abi1	1.4684	1.2384	1.27869	2.01123	1.27577	1.16357	0.0325078	0.142046	0.639	0.521	1
Abi2	0.280777	0.260541	0.228189	0	0.179598	0.187986	0.0549778	0.474469	0.114	0.071	1
Abi3	0	0.0286379	0.03484	0	0	0.00735	0.162009	2.13397	0.013	0.003	1
Abi3bp	0	0.0574491	0.0455604	0	0.090778	0	0.519463	-0.188041	0.015	0.01	1
Abitram	0.0577316	0.0427202	0.0813238	0	0.0374869	0.0494159	0.638954	0.533923	0.028	0.023	1
Abl1	0.234121	0.394473	0.409544	0	0.391663	0.50301	0.598274	-0.291029	0.182	0.186	1
Abl2	1.03219	0.808068	0.856325	0	0.861888	0.769134	0.10682	0.135335	0.425	0.354	1
Ablim2	0	0	0.0175	0.962458	0	0.0351776	0.18254	-1.24716	0.004	0.013	1
Abracl	0.991643	0.982225	0.775414	0.962458	1.15232	1.12799	0.00041537	-0.573639	0.459	0.531	1
Abraxas1	0	0.0414923	0.0182242	0	0.0707847	0.010959	0.889447	-0.831327	0.011	0.01	1
Abraxas2	0.12458	0.248303	0.220767	0	0.248439	0.263336	0.376972	-0.271785	0.129	0.103	1
Abt1	0.0673388	0.0577934	0.0990607	0	0.0740204	0.0957497	0.479629	-0.0984294	0.039	0.029	1
Abtb1	0.0399352	0.148396	0.217616	0	0.0199607	0.04845	0.00272071	2.29385	0.06	0.016	1
Abtb2	0.356376	0.268939	0.113957	0	0.0854	0.0648111	0.0211033	1.54455	0.071	0.032	1
AC106834.1	0	0.0281995	0	0	0.0492286	0	0.360124	-1.2638	0.004	0.01	1
AC149090.1	0.717315	1.01325	1.03908	0	0.814851	1.10749	0.253218	0.0450674	0.489	0.392	1
AC154200.1	0	0.0117853	0.0181379	0	0	0.0332084	0.62448	-0.351242	0.006	0.01	1
AC160336.1	0.167714	0.178187	0.155678	0	0.307414	0.244789	0.155845	-0.822613	0.079	0.106	1
AC166172.1	0	0.035062	0.0416044	0	0.00879637	0.0496969	0.803588	0.134839	0.015	0.013	1
AC241534.1	0	0.00780269	0.0684766	0	0.038475	0	0.275115	0.76347	0.015	0.006	1
Acaa1a	0.415553	0.297722	0.385136	0	0.398144	0.334256	0.253156	-0.0330841	0.187	0.145	1
Acaa2	0.403996	0.409455	0.421915	0	0.326061	0.263404	0.00104779	0.573225	0.21	0.113	1
Acaca	0.101741	0.08817	0.198831	0	0.169683	0.113432	0.385213	0.0292789	0.064	0.048	1
Acad10	0.0435558	0.0529167	0.0296075	0	0.0394779	0.0198695	0.290882	0.355081	0.019	0.01	1
Acad11	0.149168	0.0709731	0.0946647	0	0	0.0629938	0.0110639	1.56373	0.052	0.016	1
Acad12	0.0190483	0.0121374	0.0589141	0	0.014308	0.0339659	0.517299	0.525712	0.015	0.01	1
Acad8	0.0983008	0.0906896	0.136096	0	0.145635	0.152283	0.529606	-0.403378	0.06	0.048	1
Acad9	0.125179	0.0702389	0.0799633	0	0.0389136	0.031194	0.0282178	1.2046	0.045	0.016	1
Acadl	0.78968	0.656973	0.6401	0	0.456829	0.405246	8.23252e-05	0.822462	0.333	0.203	1
Acadm	0.620631	0.564279	0.534321	0.962458	0.575616	0.449119	0.0460256	0.138575	0.292	0.209	1
Acads	0.197338	0.188126	0.271546	0	0.120409	0.212282	0.0470986	0.519633	0.107	0.064	1
Acadsb	0.17939	0.197244	0.225669	0	0.23149	0.268346	0.998759	-0.287745	0.103	0.1	1
Acadvl	0.446296	0.366136	0.380717	0	0.240947	0.413902	0.0840144	0.278379	0.17	0.119	1
Acap2	1.0394	0.849395	0.821593	0	0.71691	0.679307	0.00527238	0.455049	0.444	0.334	1
Acap3	0.256124	0.104994	0.12429	0	0.0973673	0.189254	0.0720636	-0.0379438	0.071	0.039	1
Acat1	0.586525	0.473568	0.547216	0	0.722918	0.604237	0.70342	-0.441865	0.27	0.27	1
Acat2	0.094621	0.0141884	0.0930216	0	0.0296532	0.103421	0.107088	-0.00898349	0.041	0.019	1
Acbd3	0.604889	0.444433	0.339106	0	0.476198	0.444941	0.684188	-0.152912	0.219	0.199	1
Acbd4	0.0267527	0.0398204	0.0801873	0	0.0111147	0.052095	0.629884	0.827693	0.017	0.013	1
Acbd5	0.938361	0.640486	0.569951	0.962458	0.55114	0.420326	0.000325963	0.558526	0.337	0.206	1
Acbd6	0.200648	0.270353	0.312448	0	0.298719	0.268018	0.283074	-0.0189776	0.142	0.109	1
Accs	0.0505012	0.0738172	0.107254	0	0.0786578	0.103503	0.409401	-0.0772899	0.041	0.029	1
Acd	0.135513	0.0924823	0.116933	0	0.0907209	0.0815596	0.167623	0.36733	0.054	0.032	1
Ace	0.113915	0.0145254	0.0182983	0	0.134372	0	0.471425	-1.12094	0.013	0.019	1
Acer2	0.0596552	0.00736081	0.0118843	0	0.0518031	0.0110682	0.991334	-0.819269	0.013	0.013	1
Acer3	1.05599	0.797536	0.928842	0	0.805958	0.64083	0.000334751	0.462281	0.438	0.293	1
Acin1	0.813189	0.609099	0.591086	0	0.555149	0.554625	0.0170649	0.262697	0.339	0.235	1
Ackr3	0	0.011849	0.068333	0	0.0209698	0.0491975	0.878798	0.0954515	0.009	0.01	1
Acly	0.673949	0.670352	0.525835	1.44368	0.399007	0.50685	0.00226353	0.504668	0.281	0.177	1
Aco1	0.190381	0.216951	0.308175	0	0.259657	0.282869	0.226555	-0.0749437	0.122	0.09	1
Aco2	0.348584	0.472276	0.390509	0.962458	0.449501	0.509064	0.882226	-0.27092	0.221	0.209	1
Acot13	0.224266	0.34116	0.303815	0	0.177044	0.293795	0.00509691	0.423018	0.17	0.093	1
Acot2	0.0877552	0.0971083	0.164987	0	0.100299	0.105357	0.242316	0.339272	0.058	0.039	1
Acot8	0.104762	0.142111	0.0748346	0	0.0862846	0.145913	0.426364	-0.17168	0.056	0.042	1
Acot9	0.360349	0.382263	0.268942	0	0.298049	0.353026	0.473102	-0.00191932	0.17	0.145	1
Acox1	0.580584	0.481093	0.482835	0	0.415382	0.37463	0.0162784	0.411646	0.273	0.186	1
Acox3	0.527027	0.21842	0.310897	0	0.212475	0.131204	0.000650684	0.968412	0.146	0.064	1
Acp1	0.415652	0.32334	0.215212	0	0.351941	0.362301	0.724648	-0.360746	0.139	0.145	1
Acp2	0.748087	0.646229	0.653397	0.962458	0.525141	0.624036	0.117214	0.280955	0.3	0.241	1
Acp5	0.0819594	0.0950779	0.0735783	0	0.14726	0.0244485	0.339855	-0.135185	0.039	0.026	1
Acp6	0.0374573	0.0933574	0.114092	0	0	0.12734	0.22642	0.567381	0.039	0.023	1
Acpp	0	0.0178711	0.010205	0	0.0306061	0.0176356	0.869375	-1.04208	0.009	0.01	1
Acrbp	0.024533	0.0251368	0.031311	0	0.0192876	0.0697441	0.897307	-0.650595	0.015	0.016	1
Acsf2	0.0504012	0.145598	0.205118	0	0.0652094	0.0604364	0.0339349	1.3821	0.062	0.029	1
Acsf3	0.038916	0.0777959	0.0187952	0	0.0546815	0.0407899	0.704102	-0.180545	0.024	0.019	1
Acsl1	0.259547	0.386567	0.386211	0	0.269207	0.223261	0.00797185	0.657036	0.165	0.096	1
Acsl3	0.331722	0.116473	0.212668	0	0.265005	0.252358	0.782844	-0.40898	0.088	0.08	1
Acsl4	1.26584	0.96542	0.933747	1.44368	0.733875	0.803817	0.000309941	0.572397	0.459	0.325	1
Acsl5	0.556742	0.430961	0.330747	1.44368	0.458501	0.359753	0.196072	-0.0569427	0.219	0.167	1
Acss1	0.201102	0.302805	0.323624	0	0.31178	0.448557	0.745661	-0.412284	0.133	0.119	1
Acss2	0	0.131665	0.115726	0	0.0648948	0.102485	0.214155	0.314967	0.043	0.026	1
Acta2	1.37203	0.941443	0.809443	0	1.49702	0.840052	0.366942	-0.572429	0.382	0.376	1
Actg1	2.81729	2.92116	2.79972	3.79973	3.01258	2.99019	0.00824973	-0.242658	0.957	0.939	1
Actg2	0.0359808	0.0255473	0.0397021	0	0.0196267	0.0104933	0.284649	0.996765	0.019	0.01	1
Actl6a	0.317792	0.243289	0.131488	0	0.250621	0.269877	0.967242	-0.398589	0.099	0.093	1
Actn1	0.286775	0.209364	0.225899	0	0.358118	0.148649	0.662746	-0.211358	0.109	0.096	1
Actn2	0.0150965	0	0	0	0.0370883	0	0.151841	-2.31224	0.002	0.01	1
Actn4	0.784612	0.734513	0.858916	0	0.735114	0.720514	0.00439332	0.210768	0.397	0.273	1
Actr10	0.351677	0.333902	0.303422	0	0.324951	0.35129	0.317778	-0.0801887	0.167	0.132	1
Actr1a	0.561261	0.43305	0.359336	0	0.384055	0.426541	0.042876	0.0650078	0.219	0.148	1
Actr1b	0.301213	0.244457	0.28083	0.962458	0.267332	0.289933	0.251231	-0.0635652	0.139	0.106	1
Actr2	1.83927	1.70721	1.61287	1.76719	1.61576	1.58965	0.0197723	0.145024	0.794	0.691	1
Actr3	1.59193	1.54346	1.61852	1.76719	1.69484	1.54164	0.834636	-0.0644318	0.747	0.685	1
Actr5	0.114138	0.015712	0.181383	0	0.0626032	0.124517	0.109394	0.311602	0.049	0.026	1
Actr6	0.0759417	0.202907	0.142939	0	0.0948796	0.190386	0.324896	0.118388	0.058	0.042	1
Actr8	0.178137	0.0816381	0.133237	0.962458	0.184949	0.078128	0.294926	-0.194956	0.069	0.048	1
Acvr1	0.117109	0.221397	0.351475	0	0.170288	0.31857	0.112248	0.174027	0.127	0.087	1
Acvr1b	0.0585902	0.169531	0.0849197	0	0.0658189	0.167535	0.984066	-0.0736437	0.045	0.045	1
Acvr2a	0.329725	0.289924	0.238662	0	0.308358	0.224108	0.102111	0.0188372	0.135	0.093	1
Acvr2b	0.0846308	0.124247	0.0602302	0	0.0235394	0.019834	0.0238737	1.88703	0.03	0.006	1
Acvrl1	0.429066	0.345717	0.299469	0	0.275989	0.290024	0.0338494	0.293612	0.165	0.106	1
Acy1	0.0434631	0.0432946	0	0	0.0285092	0.0393344	0.704956	-0.601573	0.013	0.016	1
Acyp1	0.0747684	0.21644	0.164528	0	0.0965908	0.145953	0.137221	0.510591	0.084	0.055	1
Acyp2	0.231471	0.165694	0.136211	0	0.135562	0.0843551	0.0965563	0.566584	0.071	0.042	1
Ada	0.0754391	0.0558019	0.111206	0	0.115052	0.0336231	0.10342	0.165594	0.041	0.019	1
Adal	0.0190832	0.0568914	0.0105852	0	0	0.109512	0.395909	-0.933436	0.017	0.01	1
Adam10	0.951152	0.657211	0.863729	0.962458	0.752441	0.579964	0.0011593	0.377888	0.401	0.264	1
Adam15	1.31368	1.2378	1.29916	1.44368	1.2116	1.33707	0.451962	0.010638	0.616	0.54	1
Adam17	0.845035	0.948266	0.807523	0	0.839541	0.85159	0.261965	0.0520843	0.431	0.36	1
Adam19	0.571616	0.691564	0.807105	0.962458	0.555331	0.654604	0.00782614	0.373438	0.354	0.248	1
Adam1a	0.0213743	0.0264669	0.00496352	0	0.00928374	0	0.242224	1.11878	0.011	0.003	1
Adam22	0.263675	0.247979	0.222094	0	0.0806941	0.187855	0.0127047	0.889523	0.099	0.048	1
Adam3	0.021483	0.176295	0.0295105	0	0.0212059	0.029666	0.119218	1.60907	0.03	0.013	1
Adam32	0	0.0174401	0.0460366	0	0	0.013306	0.163811	1.70065	0.013	0.003	1
Adam33	0.257713	0.298035	0.353567	0	0.265376	0.467967	0.518432	-0.24047	0.148	0.125	1
Adam8	0.0433079	0.0165208	0.0866778	0	0.0447358	0.0864512	0.369562	-0.240833	0.03	0.019	1
Adam9	1.27922	0.929711	0.947507	0	0.787517	0.7897	5.69804e-05	0.525379	0.5	0.331	1
Adamts1	0.0836409	0.131052	0.0212648	0	0.153686	0.0560685	0.46143	-0.624965	0.028	0.019	1
Adamts10	0.0979339	0.126514	0.183668	0	0.158012	0.162095	0.269197	-0.0966934	0.073	0.051	1
Adamts2	0	0.0324051	0.043922	0	0.0127731	0.03919	0.512984	0.295871	0.015	0.01	1
Adamts5	0.015231	0.0072891	0.0924569	0	0.0378798	0.0156046	0.798659	0.836208	0.015	0.013	1
Adamts6	0.0517699	0.0376069	0.131402	0	0.0512756	0.0270112	0.127955	1.09653	0.039	0.019	1
Adamtsl1	0.0516692	0	0.084483	0	0.243327	0.015199	0.139011	-1.4992	0.019	0.006	1
Adamtsl3	0	0.0072891	0.0148991	0	0.0258313	0.00716361	0.615372	-0.737679	0.006	0.01	1
Adamtsl4	0.0382203	0.0336139	0.0276877	0	0.0213988	0.087869	0.586376	-0.782719	0.017	0.023	1
Adamtsl5	0.416564	0.258676	0.289578	0	0.420048	0.562284	0.0196481	-0.850841	0.131	0.183	1
Adap1	0.13162	0.117627	0.217857	0	0.134303	0.0972322	0.141711	0.570712	0.079	0.051	1
Adap2	0.625955	0.645004	0.828409	0	0.640528	0.848354	0.318485	-0.0239249	0.376	0.312	1
Adap2os	0.07662	0.201273	0.41724	0	0.164504	0.201133	0.00495314	0.776782	0.137	0.071	1
Adar	0.348168	0.200955	0.202959	0	0.300559	0.385191	0.756882	-0.676294	0.112	0.113	1
Adarb1	0.224217	0.0517089	0.0481453	0	0.0836062	0.3112	0.468499	-1.40133	0.032	0.042	1
Adat1	0.0497338	0.0579781	0.0487203	0	0.0326324	0.023548	0.0898612	0.808766	0.032	0.013	1
Adat2	0.0588552	0.0308326	0.0450195	0	0.0217362	0.00716361	0.205857	1.3342	0.021	0.01	1
Adck1	0.149837	0.102366	0.144151	0	0.208553	0.0822602	0.34289	-0.209551	0.062	0.045	1
Adck2	0.113517	0.0403141	0.0469537	0	0.108037	0.0603542	0.920344	-0.633546	0.034	0.032	1
Adck5	0.0728055	0.0548266	0.0422362	0.962458	0.0551171	0.20952	0.105876	-1.44602	0.032	0.055	1
Adcy3	0.138423	0.0941679	0.134298	0	0.130274	0.172646	0.727728	-0.340081	0.062	0.055	1
Adcy5	0.0150965	0.133285	0.0846354	0	0.071545	0.0311552	0.090556	0.788648	0.032	0.013	1
Adcy6	0	0.062073	0.100093	0	0.122038	0.0125994	0.225503	0.00325196	0.034	0.019	1
Adcy7	0.52581	0.66874	0.614284	0.962458	0.581269	0.665687	0.489054	-0.0139191	0.32	0.28	1
Adcy9	0.57476	0.561806	0.650769	0	0.445564	0.489405	0.00245148	0.493453	0.275	0.177	1
Add1	0.732427	0.61983	0.661317	0.962458	0.711417	0.665922	0.441122	-0.0950415	0.343	0.289	1
Add3	0.697167	0.691088	0.748444	0	0.710458	0.575863	0.103535	0.215293	0.343	0.277	1
Adgb	0.123922	0.0730344	0.0620794	0	0.0259753	0.0390691	0.070891	1.17238	0.039	0.016	1
Adgra3	0.0484786	0.0846382	0.0333914	0	0.0327853	0.054787	0.739865	0.277772	0.019	0.016	1
Adgre1	1.89949	1.82579	1.75307	0.962458	1.91895	2.00998	0.00248708	-0.270407	0.818	0.855	1
Adgre4	0	0.0392395	0.0168343	0	0.119495	0.0411425	0.0186823	-1.85812	0.013	0.039	1
Adgre5	0.414701	0.511686	0.58888	0.962458	0.827373	0.817338	7.48123e-05	-0.847748	0.189	0.305	1
Adgrg1	0	0.0868662	0.0887929	0	0.0231699	0	0.00379437	2.38015	0.034	0.003	1
Adgrg6	0.666418	0.632999	0.543857	0.962458	0.746014	0.673653	0.876526	-0.352208	0.279	0.273	1
Adgrl1	0.0683606	0.00928846	0.0102034	0	0	0.042397	0.539243	-0.152563	0.011	0.006	1
Adgrl2	0.189145	0.177771	0.166227	0	0.196376	0.109989	0.360331	0.168732	0.069	0.051	1
Adgrv1	0	0.0582977	0.0343561	0	0.0214988	0.0280702	0.517299	0.519591	0.015	0.01	1
Adh5	0.621436	0.263695	0.281172	0	0.325362	0.126927	0.0254971	0.60142	0.133	0.08	1
Adhfe1	0.0582252	0.032736	0.0493096	0	0	0.0391089	0.212244	1.10056	0.021	0.01	1
Adi1	0.231697	0.221828	0.250893	0	0.198192	0.216201	0.122712	0.219382	0.114	0.077	1
Adipor1	1.10637	0.989989	1.03852	1.44368	0.883072	1.02509	0.0879413	0.174572	0.506	0.421	1
Adk	0.496111	0.418771	0.381938	0	0.377697	0.396857	0.260427	0.117833	0.195	0.158	1
Adm	0	0.0277052	0.0331393	0	0.0242257	0.052196	0.194396	-0.54667	0.006	0.016	1
Adnp	0.544703	0.445718	0.437717	0	0.422727	0.272108	0.000293552	0.458083	0.262	0.141	1
Adnp2	0.179906	0.254687	0.299871	0	0.144568	0.186027	0.0078386	0.754308	0.112	0.055	1
Ado	0.161267	0.149852	0.193231	1.44368	0.113189	0.197567	0.424192	0.0822901	0.086	0.068	1
Adpgk	0.193685	0.324561	0.220395	0	0.267586	0.344672	0.84238	-0.303328	0.122	0.113	1
Adprh	0.376696	0.283088	0.241944	0	0.253729	0.240432	0.195575	0.19464	0.148	0.109	1
Adprhl2	0.0856887	0.131904	0.201737	0	0.168768	0.0553868	0.1045	0.486617	0.062	0.035	1
Adprm	0.0893707	0.161084	0.12762	0	0.0802303	0.0725425	0.104736	0.814118	0.058	0.032	1
Adrb1	0.0317409	0.0319477	0.069302	0	0.114546	0.0853787	0.634379	-1.01159	0.032	0.026	1
Adrb2	0.71896	0.63149	0.797358	0	0.659831	0.955527	0.914138	-0.222043	0.315	0.286	1
Adrm1	0.321555	0.249	0.247059	0	0.283057	0.358809	0.663828	-0.344811	0.122	0.129	1
Adsl	0.0978864	0.138475	0.206513	0	0.0583807	0.155122	0.163874	0.670419	0.077	0.051	1
Adss	0.24086	0.219185	0.328552	0	0.198889	0.252153	0.179768	0.33912	0.135	0.1	1
Adssl1	0.144717	0.176206	0.204936	0	0.11414	0.231672	0.138986	0.108139	0.088	0.058	1
Aebp1	0.0372113	0.102982	0.180105	0	0.196386	0	0.281465	0.317086	0.036	0.023	1
Aebp2	0.444955	0.342236	0.339771	0	0.25665	0.334174	0.395294	0.326342	0.159	0.132	1
Aen	0.181306	0.102292	0.112935	0	0.12534	0.115641	0.425609	-0.00997635	0.052	0.039	1
Afap1	0.0541561	0.0357829	0.0824342	0	0.0359888	0.131165	0.685471	-0.443164	0.021	0.026	1
Afap1l1	0.664029	0.257019	0.321962	0	0.418285	0.487669	0.862117	-0.379149	0.176	0.17	1
Afdn	0.198744	0.129248	0.277252	0	0.136867	0.103818	0.171197	0.882557	0.084	0.058	1
Aff1	0.824685	0.845602	0.712906	0	0.783322	0.633852	0.0374167	0.182017	0.386	0.293	1
Aff2	0	0.0276737	0.0227451	0	0.0561989	0	0.875655	-0.502291	0.009	0.01	1
Aff3	0	0.0612025	0.112335	0	0.0516935	0.189026	0.452416	-0.663077	0.024	0.032	1
Aff4	1.02109	1.21922	1.07521	0	0.883262	1.10636	0.00321342	0.274376	0.545	0.408	1
Afg1l	0.0887894	0.0818937	0.125418	0	0.0986315	0.112506	0.522009	-0.0200528	0.056	0.045	1
Afg3l1	0.139628	0.264515	0.343892	0	0.276932	0.237829	0.0250352	0.168064	0.146	0.087	1
Afg3l2	0.270735	0.247585	0.256678	0	0.185978	0.364254	0.812941	-0.125722	0.129	0.119	1
Afmid	0	0.0524327	0.102163	0	0.0706062	0.0324413	0.168257	0.379491	0.036	0.019	1
Aftph	1.2042	1.09438	1.18865	0	1.10775	1.23637	0.608343	-0.0228837	0.567	0.508	1
Aga	0.126563	0.221821	0.187157	0	0.166963	0.176389	0.0325231	0.157194	0.105	0.058	1
Agap1	0.483871	0.369575	0.536346	0	0.336939	0.367111	0.00710021	0.518082	0.212	0.132	1
Agap3	0.233705	0.172825	0.324358	0	0.241976	0.297395	0.0823322	-0.061008	0.129	0.084	1
Agbl3	0.0692533	0.0520348	0.0547736	0	0.0238934	0.0655608	0.28637	0.309043	0.032	0.019	1
Agbl4	0.046371	0	0.00645042	0	0.0338887	0.0462296	0.612348	-1.7667	0.006	0.01	1
Agbl5	0.0753905	0.0201178	0.0285937	0	0.0516328	0.0280318	0.710803	-0.297947	0.024	0.019	1
Agfg1	0.792049	0.698043	0.652997	0	0.700397	0.701876	0.127854	-0.0229412	0.367	0.286	1
Agfg2	0.0780009	0.117569	0.114658	0	0.0597136	0.139113	0.249188	0.147581	0.054	0.035	1
Aggf1	0.461635	0.221476	0.32294	0	0.328732	0.26903	0.206829	0.0680089	0.159	0.122	1
Agk	0.0568812	0.070369	0.108002	0	0.0904648	0.170666	0.969835	-0.60756	0.043	0.042	1
Agl	0.0968069	0.141927	0.173797	0	0.0642303	0.237421	0.443044	-0.0146921	0.073	0.058	1
Agmo	1.52315	1.5521	1.41522	0.962458	1.24908	1.35004	0.00769244	0.352984	0.629	0.543	1
Ago1	0.253584	0.156555	0.200169	0	0.233242	0.29912	0.662964	-0.503907	0.09	0.096	1
Ago2	0.748297	0.450478	0.446812	0	0.410195	0.511897	0.105466	0.158946	0.262	0.196	1
Ago3	0.845428	0.731307	0.827108	0	0.620807	0.620355	0.00356816	0.506617	0.397	0.286	1
Ago4	0.338909	0.415915	0.309892	0	0.325183	0.315154	0.256814	0.16343	0.152	0.119	1
Agpat1	0.226667	0.198036	0.0923125	0	0.240061	0.22652	0.769188	-0.671256	0.077	0.08	1
Agpat2	0.332311	0.157248	0.226764	0	0.201751	0.201317	0.487345	0.14345	0.082	0.096	1
Agpat3	0.628147	0.491097	0.517751	0	0.449108	0.561314	0.205973	0.0810245	0.247	0.196	1
Agpat4	0.214748	0.145389	0.217415	0	0.221568	0.0936109	0.157183	0.266324	0.092	0.061	1
Agpat5	0.309742	0.334757	0.376148	0	0.404944	0.297669	0.0760642	-0.0135248	0.165	0.113	1
Agps	0.684955	0.629508	0.68619	0.962458	0.528355	0.631692	0.0165023	0.262962	0.352	0.248	1
Agrn	0.118956	0.0521921	0.0791062	0	0.06016	0.0211962	0.0496833	0.840794	0.036	0.013	1
Agtpbp1	0.178563	0.214819	0.232394	0	0.118762	0.225441	0.0772118	0.369736	0.107	0.068	1
Agtrap	0.554841	0.560863	0.482753	0	0.602412	0.607284	0.536492	-0.273179	0.236	0.241	1
Ahctf1	0.206831	0.307491	0.327037	0	0.283963	0.25205	0.0227915	0.192239	0.15	0.09	1
Ahcyl1	0.466713	0.387271	0.368351	0	0.353904	0.357622	0.0771138	0.164591	0.2	0.141	1
Ahcyl2	0.739938	0.588576	0.532368	0	0.389541	0.43149	0.000411072	0.657251	0.296	0.174	1
Ahdc1	0.209456	0.0653406	0.165618	0	0.0714162	0.0885213	0.0495282	0.815782	0.06	0.029	1
Ahi1	0.119024	0.17429	0.0683059	0	0.0697008	0.0890527	0.107605	0.534965	0.058	0.032	1
Ahnak	2.63399	2.22781	2.19139	1.76719	2.3527	2.15929	0.484625	0.0407276	0.88	0.859	1
Ahnak2	0.0119236	0.0402844	0.0300555	0	0.00401175	0.0432217	0.288101	0.330127	0.019	0.01	1
Ahr	0.143268	0.307161	0.273368	0	0.100382	0.27151	0.0912594	0.561075	0.116	0.077	1
Ahrr	0.0748694	0.0328921	0.0401636	0	0.0172338	0.0353928	0.801122	0.649433	0.015	0.013	1
Ahsa1	0.520892	0.414009	0.421376	0	0.437045	0.479661	0.647013	-0.0880749	0.212	0.186	1
Ahsa2	0.154021	0.172768	0.0923354	0	0.173603	0.185172	0.682853	-0.484982	0.071	0.061	1
AI314278	0.283929	0	0.00991084	0	0	0	0.0672115	4.20202	0.011	0	1
AI413582	0.461408	0.463073	0.399702	1.44368	0.470201	0.609962	0.344927	-0.42328	0.221	0.235	1
AI427809	0.0398197	0.116303	0.129137	0	0.101864	0.0254875	0.0824925	0.754219	0.052	0.026	1
AI467606	0.111578	0.285915	0.302026	0.962458	0.334047	0.387604	0.249775	-0.508204	0.12	0.145	1
AI480526	0.0529931	0.0288846	0.098088	0	0.0195486	0.0213319	0.0410945	1.59247	0.032	0.01	1
AI504432	0.154294	0.143133	0.0987241	0	0.152271	0.0903684	0.202514	6.44329e-05	0.056	0.035	1
AI506816	0.0626296	0.0756917	0.153151	0	0.0250951	0.0311156	0.00761494	1.94297	0.054	0.016	1
AI597479	0.0885972	0.10571	0.0370823	0	0.1305	0.00870517	0.42041	-0.0888114	0.036	0.026	1
AI662270	0.525808	0.64111	0.717658	0	0.696529	0.582163	0.0312621	0.0625415	0.311	0.222	1
AI837181	0.200663	0.277652	0.211742	0	0.174763	0.151841	0.179698	0.555045	0.107	0.077	1
AI838599	0	0.0133393	0.0109322	0	0.00800747	0.0495425	0.612348	-1.37905	0.006	0.01	1
AI839979	0.11569	0.0557383	0.119104	0	0.031234	0.108542	0.137001	0.472415	0.047	0.026	1
AI987944	0.102626	0.0411246	0.172903	0	0.068806	0.243639	0.933145	-0.448164	0.058	0.055	1
Aida	0.504765	0.429285	0.291044	0	0.41211	0.279697	0.414626	0.126839	0.165	0.138	1
Aif1	1.65301	1.3939	1.20807	0.962458	1.50807	1.33109	0.840837	-0.131548	0.633	0.601	1
Aifm1	0.12245	0.129334	0.149334	0	0.0911483	0.0781392	0.080427	0.715575	0.069	0.039	1
Aifm2	0.0870996	0.038709	0.0153527	0	0.0553615	0	0.496583	0.225751	0.019	0.013	1
Aig1	0.351706	0.465086	0.378026	0	0.531289	0.30605	0.133302	-0.0963134	0.197	0.148	1
Aim2	0.484977	0.512325	0.525121	1.44368	0.464776	0.466484	0.00447472	0.158108	0.264	0.164	1
Aimp1	0.34943	0.479669	0.492676	0	0.43837	0.410179	0.139254	0.16885	0.227	0.174	1
Aimp2	0.100643	0.0850909	0.0364799	0	0.104433	0.155748	0.330018	-1.04744	0.041	0.055	1
Aip	0.274348	0.336981	0.267272	0.962458	0.495409	0.352107	0.765642	-0.659652	0.161	0.158	1
Airn	0.127898	0.0531531	0.0755689	0	0.0701425	0.0550003	0.923133	0.263752	0.036	0.035	1
Ajuba	0.0140248	0.034985	0.0194881	0	0.00401175	0.089978	0.519463	-0.935089	0.015	0.01	1
Ak1	0.0507344	0.0117447	0.0139792	0	0.0222391	0.0279036	0.56867	-0.40587	0.009	0.013	1
Ak2	0.279279	0.311797	0.281784	0	0.212994	0.275076	0.0692078	0.29541	0.146	0.096	1
Ak3	0.38585	0.317104	0.388238	0.962458	0.221052	0.283069	0.0357988	0.58595	0.18	0.122	1
Ak6	0.283656	0.160896	0.198119	0	0.155049	0.180302	0.0727997	0.270861	0.103	0.064	1
Akap1	0.0910989	0.118516	0.136452	0	0.150115	0.0950036	0.372814	-0.015771	0.06	0.045	1
Akap10	0.278458	0.383413	0.471989	0	0.212239	0.358011	0.0135042	0.625655	0.195	0.125	1
Akap11	0.23855	0.284835	0.143637	0	0.310772	0.278432	0.655258	-0.549598	0.122	0.106	1
Akap12	0.0167612	0.0221279	0.0038546	0	0.00401175	0.0663252	0.877227	-1.39809	0.009	0.01	1
Akap13	1.44832	1.52513	1.61681	2.51178	1.41745	1.49261	0.0375504	0.18353	0.74	0.605	1
Akap17b	0.0167612	0.0199246	0.0822629	0	0.0261724	0.0560844	0.47842	0.27339	0.024	0.016	1
Akap6	0.0929297	0.0421795	0.019912	0	0.0746601	0.0298931	0.80976	-0.439762	0.015	0.013	1
Akap7	0.357607	0.292589	0.368619	0.962458	0.215537	0.315169	0.0390904	0.393541	0.146	0.093	1
Akap8	0.298481	0.263057	0.29254	0.962458	0.246993	0.253245	0.0585028	0.177031	0.157	0.103	1
Akap8l	0.286301	0.338959	0.302297	0	0.337639	0.569711	0.527109	-0.651339	0.157	0.167	1
Akap9	0.570581	0.307464	0.374074	0.962458	0.248577	0.271472	0.00929773	0.638071	0.191	0.119	1
Akip1	0.0975089	0.0559936	0.122889	0	0.0315111	0.1181	0.048741	0.35929	0.052	0.023	1
Akirin1	0.820864	0.547749	0.571472	0.962458	0.370215	0.65325	0.0553224	0.29424	0.285	0.219	1
Akirin2	0.365806	0.491772	0.635937	0	0.492742	0.416668	0.00262019	0.333947	0.277	0.17	1
Akna	0.173869	0.24833	0.279414	0	0.250324	0.316467	0.47022	-0.185922	0.122	0.103	1
Akr1a1	1.81581	1.61645	1.55074	1.76719	1.76188	1.63399	0.593819	-0.146378	0.775	0.74	1
Akr1b10	0.203911	0.0764535	0.149323	0	0.211889	0.187875	0.304871	-0.62955	0.069	0.087	1
Akr1b3	0.881237	0.800663	0.837588	0.962458	0.925351	0.742387	0.591931	-0.0251147	0.423	0.383	1
Akr1b8	0.123712	0.163748	0.10959	0	0.170922	0.0842173	0.436928	0.00728866	0.062	0.048	1
Akr1c12	0	0.0420085	0.0276313	0	0.00778311	0.0277282	0.880607	0.572261	0.011	0.01	1
Akr1c13	0.0782571	0.240549	0.160424	0	0.355466	0.111305	0.738796	-0.514674	0.064	0.058	1
Akr1e1	0.137985	0.117078	0.177302	0.962458	0.0573762	0.208926	0.103019	0.124084	0.084	0.051	1
Akr7a5	0.0957013	0.167368	0.178266	0	0.20297	0.1456	0.410612	-0.130804	0.09	0.071	1
Akt1	0.905407	0.617532	0.554435	1.44368	0.6664	0.665731	0.798256	-0.0904396	0.318	0.289	1
Akt1s1	0.399221	0.290067	0.321749	0	0.192614	0.373114	0.137995	0.216983	0.144	0.103	1
Akt2	0.581168	0.558952	0.581782	0	0.464643	0.661638	0.0104449	0.0322512	0.309	0.199	1
Akt3	0.378188	0.456243	0.409278	0	0.346389	0.371946	0.259714	0.27874	0.152	0.122	1
Aktip	0.221176	0.15694	0.151683	0	0.165999	0.174323	0.340131	-0.0514436	0.092	0.071	1
Alad	0.0702676	0.0603094	0.0845154	0	0.0421129	0.0584924	0.267238	0.534446	0.041	0.026	1
Alas1	0.0951253	0.231111	0.331658	0	0.0880127	0.140948	0.000387019	1.29037	0.12	0.045	1
Alcam	0.359186	0.604394	0.45394	0	0.418441	0.339054	0.343084	0.468008	0.157	0.132	1
Aldh16a1	0.379852	0.251287	0.279379	1.44368	0.217804	0.225368	0.0450007	0.356551	0.144	0.09	1
Aldh18a1	0	0.0167882	0.0135207	0	0.043543	0.0235247	0.336059	-1.34903	0.009	0.016	1
Aldh1a1	0.0365388	0.0400353	0.0648657	0	0.126471	0.023423	0.911723	-0.60382	0.017	0.016	1
Aldh3a2	0.542685	0.175687	0.209695	0	0.226078	0.238914	0.98827	0.177384	0.101	0.1	1
Aldh3b1	0.208975	0.197557	0.300252	0	0.310064	0.207984	0.232158	-0.0695021	0.139	0.103	1
Aldh4a1	0.048814	0.0508263	0.0456617	0	0.0105983	0.0674146	0.2944	0.276802	0.028	0.016	1
Aldh6a1	0.105523	0.118218	0.213612	0	0.135988	0.163949	0.287025	0.139481	0.079	0.058	1
Aldh7a1	0.28966	0.272225	0.239446	0	0.377825	0.337572	0.346829	-0.539862	0.127	0.145	1
Aldh9a1	0.724712	0.655175	0.611526	0.962458	0.445192	0.48851	0.000201625	0.597927	0.324	0.186	1
Aldoa	1.06428	1.07212	1.18757	0.962458	1.07839	0.887792	0.000104791	0.305316	0.594	0.392	1
Alg1	0.0773083	0.167975	0.105289	0	0.157201	0.247026	0.208281	-0.759666	0.064	0.087	1
Alg10b	0.170075	0.212434	0.300482	0	0.103313	0.16765	0.00197496	0.960944	0.114	0.048	1
Alg11	0.142613	0.144687	0.0910487	0	0.128737	0.123886	0.404637	-0.105827	0.056	0.042	1
Alg12	0.059126	0.0710679	0.0530091	0	0.0130312	0.112935	0.739385	-0.0720618	0.03	0.026	1
Alg13	0.0538351	0.198481	0.112377	0	0.0911464	0.172376	0.23872	0.0311731	0.067	0.045	1
Alg14	0.192092	0.0981903	0.168866	0	0.210821	0.200474	0.46422	-0.509668	0.077	0.061	1
Alg3	0.0132571	0.0668764	0.0988884	0	0.0285972	0	0.033072	2.13243	0.028	0.006	1
Alg5	0.389624	0.307037	0.325824	0	0.172552	0.368964	0.0168939	0.316882	0.17	0.103	1
Alg6	0.0132571	0.0650938	0.148094	0	0.0125262	0.203937	0.371196	-0.161432	0.049	0.035	1
Alg8	0.0631036	0.0688194	0.0339955	0	0.128593	0.0919482	0.481967	-1.14448	0.03	0.039	1
Alg9	0.109115	0.159016	0.196445	0.962458	0.127916	0.110263	0.15803	0.474908	0.075	0.048	1
Alkbh1	0.276213	0.12623	0.113723	0	0.155158	0.117583	0.265557	0.0857156	0.073	0.051	1
Alkbh2	0.0183151	0.0860585	0.165245	0	0.0385454	0.0947198	0.0429465	0.806777	0.047	0.019	1
Alkbh3	0.089088	0.0982277	0.145103	0	0.0962412	0.146211	0.276403	-0.014841	0.069	0.048	1
Alkbh4	0	0	0.0179164	0	0.0903719	0.0338953	0.179035	-2.63478	0.004	0.013	1
Alkbh5	0.655081	0.732028	0.696287	0	0.658313	0.57016	0.0153202	0.259279	0.335	0.235	1
Alkbh6	0.268341	0.187376	0.0914983	0	0.134626	0.112606	0.0823413	0.335885	0.086	0.051	1
Alkbh7	0.0427709	0.0214771	0.080765	0	0.058464	0.0541033	0.782686	-0.0724735	0.026	0.029	1
Alkbh8	0.0913047	0.125079	0.114998	0	0.0531772	0.0678362	0.157572	0.926034	0.049	0.029	1
Alms1	0.0337247	0.104096	0.0988954	0	0.0969179	0.0611833	0.267088	0.17432	0.045	0.029	1
Alox5	0.938141	0.738896	0.916167	0.962458	0.854644	0.790597	0.122134	0.0917624	0.442	0.36	1
Alox5ap	1.66391	1.67491	1.77719	2.01123	1.85242	1.79213	0.0814595	-0.173159	0.783	0.791	1
Als2	0.31469	0.231971	0.26805	0	0.123041	0.250102	0.0156461	0.54658	0.131	0.074	1
Alyref	0.615306	0.731587	0.783172	0	0.751754	0.729391	0.55372	0.000857803	0.373	0.328	1
Alyref2	0.0653589	0.0652478	0.106119	0	0.0979043	0.0652072	0.774997	0.0455112	0.036	0.032	1
Amacr	0	0.0818314	0.015492	0	0.0129663	0.10732	0.754881	-0.703738	0.019	0.016	1
Ambra1	0.445435	0.545418	0.639121	0	0.355067	0.433302	0.000108147	0.696821	0.296	0.167	1
Amd1	0.136966	0.207678	0.196708	0	0.13287	0.220178	0.375291	0.12666	0.086	0.068	1
Amdhd2	0.298016	0.369258	0.309524	0	0.326781	0.379868	0.181495	-0.117156	0.17	0.125	1
Amfr	0.60513	0.746767	0.648209	0	0.721653	0.693071	0.282011	-0.0850492	0.341	0.28	1
Amigo1	0.0902967	0.0543514	0.0656964	0	0.126682	0.0252113	0.543972	-0.279113	0.028	0.035	1
Amigo3	0	0	0.00895425	0	0.0245662	0.0191064	0.152595	-1.94688	0.002	0.01	1
Ammecr1	0.0991434	0.118126	0.098897	0	0.138938	0.118659	0.344963	-0.307794	0.058	0.042	1
Ammecr1l	0.224783	0.172846	0.372855	0	0.142344	0.250633	0.0151752	0.590575	0.144	0.084	1
Amn1	0.367123	0.244839	0.205088	0	0.191287	0.263468	0.0336108	0.130968	0.135	0.08	1
Amot	0	0.0258273	0.055697	0	0.0397176	0	0.511908	0.713183	0.015	0.01	1
Amotl1	0.0151067	0.00597389	0.0157171	0	0.0244331	0	0.540562	-0.14226	0.011	0.006	1
Amotl2	0.0394968	0.0121518	0.0485023	0	0.0682133	0.0128297	0.909395	-0.297196	0.017	0.016	1
Ampd2	0.191166	0.104404	0.0983652	0	0.181789	0.0673311	0.508737	-0.158329	0.064	0.051	1
Ampd3	0.430006	0.153107	0.313686	0	0.34287	0.500391	0.63308	-0.690674	0.15	0.151	1
Amy1	0.0170016	0.0670201	0.0985448	0	0.0261713	0.0354229	0.11833	1.22409	0.03	0.013	1
Amz1	0	0.0264863	0.0772945	0	0.0692737	0.0852688	0.569345	-0.702769	0.026	0.019	1
Amz2	0.161722	0.252953	0.239905	0	0.211199	0.320948	0.799524	-0.216757	0.109	0.113	1
Anapc1	0.127011	0.245661	0.246955	0	0.432686	0.255658	0.262247	-0.706751	0.12	0.141	1
Anapc10	0.320499	0.225058	0.266202	0	0.316351	0.190529	0.132244	0.0213874	0.142	0.1	1
Anapc11	0.571232	0.529667	0.625039	0	0.756239	0.658366	0.499542	-0.378396	0.313	0.302	1
Anapc13	0.468496	0.604405	0.609359	0	0.845843	0.769547	0.0184354	-0.639898	0.318	0.36	1
Anapc15	0.468867	0.302541	0.196225	0.962458	0.281666	0.261949	0.341257	0.0313026	0.148	0.119	1
Anapc16	0.410288	0.398275	0.549499	0.962458	0.260886	0.299758	9.67187e-05	0.893598	0.251	0.129	1
Anapc2	0.469501	0.232349	0.192297	0	0.28395	0.247597	0.497249	-0.0704886	0.127	0.106	1
Anapc4	0.185098	0.192222	0.247345	0	0.189053	0.181522	0.320143	0.256812	0.086	0.064	1
Anapc5	0.697706	0.484624	0.474832	0	0.515901	0.514505	0.207702	0.00873517	0.258	0.203	1
Anapc7	0.20235	0.169817	0.157198	0	0.151453	0.242559	0.332187	-0.239312	0.09	0.068	1
Ang	0.517515	0.560698	0.680611	0.962458	0.502602	0.549189	0.0229327	0.288891	0.311	0.225	1
Angel1	0	0.122183	0.013883	0	0.0335193	0.0413911	0.512984	0.405215	0.011	0.016	1
Angel2	0.446283	0.30865	0.285027	0	0.33688	0.264538	0.147007	0.0967877	0.159	0.116	1
Angptl2	0.0198689	0.0124401	0.02561	0	0.00703891	0	0.240495	1.71321	0.011	0.003	1
Ank	0.531986	0.421442	0.557204	0	0.450462	0.304468	0.00448353	0.504753	0.245	0.151	1
Ank1	0.0400743	0.0032136	0	0	0	0.0418648	0.181835	-1.28749	0.004	0.013	1
Ank2	0.689027	0.541285	0.735966	0.962458	0.554858	0.557921	0.111992	0.333256	0.279	0.219	1
Ankfy1	0.803126	0.643409	0.641345	1.44368	0.726318	0.769222	0.40543	-0.230907	0.345	0.289	1
Ankhd1	1.07085	1.17196	1.08399	1.76719	1.0434	0.932815	0.00879509	0.261241	0.545	0.415	1
Ankib1	0.514084	0.351298	0.346762	0	0.421569	0.359764	0.501287	-0.067522	0.18	0.154	1
Ankle2	0.311096	0.311474	0.25353	0.962458	0.324352	0.311977	0.167934	-0.212748	0.133	0.096	1
Ankmy2	0.025607	0.118476	0.0895087	0	0.0167708	0.0995578	0.167629	0.625482	0.045	0.026	1
Ankra2	0.329026	0.269712	0.311847	0	0.0963023	0.291221	0.0129544	0.689982	0.142	0.08	1
Ankrd10	0.37539	0.223263	0.145702	0.962458	0.222706	0.213007	0.887311	-0.0717289	0.094	0.09	1
Ankrd11	1.12957	1.10394	1.16466	1.76719	0.940456	0.963389	9.41223e-05	0.405049	0.562	0.392	1
Ankrd13a	0.549966	0.493178	0.447974	0	0.5174	0.434691	0.0844588	0.0112771	0.253	0.186	1
Ankrd13b	0.0157898	0	0.0136174	0	0.0300834	0.0410735	0.358889	-1.77863	0.004	0.01	1
Ankrd13c	0.431459	0.31543	0.340846	1.44368	0.491245	0.472888	0.33181	-0.598541	0.167	0.186	1
Ankrd13d	0.035219	0.0749702	0.0364688	0	0.0328415	0.0127732	0.0340999	1.00373	0.028	0.006	1
Ankrd16	0.0903029	0.100909	0.183734	0	0.108278	0.202267	0.289513	-0.149609	0.064	0.045	1
Ankrd17	0.865904	0.745082	0.78264	0	0.889471	0.676634	0.605815	-0.0193162	0.393	0.341	1
Ankrd24	0.0140248	0.0517618	0.0558078	0	0.0578649	0.0417039	0.852187	-0.0882324	0.021	0.019	1
Ankrd26	0.0778385	0.0706837	0.151886	0	0.0219231	0.0586666	0.0149569	1.46997	0.049	0.016	1
Ankrd27	0.203126	0.204709	0.221191	0	0.244777	0.218377	0.517433	-0.141223	0.092	0.077	1
Ankrd28	0.0843432	0.0374045	0.027713	0	0.0307676	0.0127732	0.157007	0.763095	0.024	0.01	1
Ankrd33b	0.147038	0.117903	0.157693	0	0.170414	0.0910522	0.0730898	0.0984838	0.071	0.039	1
Ankrd39	0.0355368	0.0869699	0.0882276	0	0.037417	0.025557	0.00980229	1.26717	0.047	0.013	1
Ankrd40	0.565968	0.351062	0.389536	0	0.463188	0.283392	0.0782536	0.118822	0.215	0.154	1
Ankrd42	0	0.00905313	0.0126324	0.962458	0	0.075709	0.351904	-2.00173	0.006	0.013	1
Ankrd44	1.00647	1.01065	0.958705	0.962458	0.834972	0.934137	0.00263731	0.237105	0.511	0.363	1
Ankrd46	0.17057	0.172786	0.210962	0	0.192154	0.344069	0.52881	-0.542268	0.079	0.09	1
Ankrd49	0.302904	0.163737	0.137527	0	0.0867202	0.208026	0.261571	0.258406	0.088	0.064	1
Ankrd50	0.215315	0.0880494	0.159236	0	0.0847857	0.118111	0.0431059	0.526648	0.071	0.035	1
Ankrd52	0.133696	0.210037	0.182685	0	0.136518	0.15571	0.324359	0.360743	0.088	0.068	1
Ankrd54	0.134233	0.0439207	0.0425317	0.962458	0.101492	0.0871126	0.06479	-0.790604	0.019	0.042	1
Ankrd55	0.0949635	0.00876345	0	0	0.00974401	0.0309521	0.877227	-0.154025	0.009	0.01	1
Ankrd66	0	0.0443303	0.0322965	0	0.0338724	0	0.387974	0.704804	0.017	0.01	1
Ankrd9	0.0313087	0.0487556	0.0349214	0	0	0	0.030099	3.712	0.015	0	1
Anks1	0.583138	0.533175	0.775294	0	0.644084	0.823787	0.837331	-0.192494	0.315	0.305	1
Anks1b	0.0402884	0.0494176	0.0941712	0	0.0738223	0.0162473	0.0914891	0.568159	0.032	0.013	1
Anks3	0.159429	0.131125	0.17183	0	0.157073	0.219505	0.793022	-0.292519	0.071	0.064	1
Anks6	0.104022	0.0350576	0.0437636	0	0.0437155	0.0133567	0.59583	0.724595	0.021	0.016	1
Ankzf1	0.0813754	0.0115262	0.0512453	0	0.0675475	0.0849544	0.953576	-0.848486	0.024	0.023	1
Anln	0.118599	0.125585	0.0914617	0	0.155527	0.047843	0.369721	0.0325617	0.049	0.035	1
Ano1	0	0	0.0137655	0	0.021925	0.0745984	0.0133696	-2.5367	0.002	0.019	1
Ano10	0.174325	0.150758	0.159138	0	0.226854	0.178926	0.650811	-0.393924	0.079	0.087	1
Ano6	0.863421	0.612081	0.672934	0	0.449978	0.594994	0.00102119	0.521194	0.35	0.228	1
Ano8	0.0387972	0.0677063	0.0246934	0	0.0862671	0.0701011	0.460139	-0.903669	0.024	0.032	1
Anp32a	0.997248	0.98164	1.01079	1.44368	1.05258	1.03394	0.871295	-0.105879	0.509	0.45	1
Anp32b	0.872328	0.67356	0.766673	0.962458	0.758606	0.824841	0.57589	-0.104647	0.382	0.334	1
Anp32e	0.45989	0.513856	0.512746	0.962458	0.530915	0.475369	0.191183	-0.00726179	0.245	0.193	1
Anpep	0.0464465	0.0996613	0.0484771	0	0.0137239	0.0195663	0.0558164	1.83348	0.03	0.01	1
Antxr1	0.0183798	0.0197201	0.0640273	0	0.0576958	0	0.197335	0.399668	0.017	0.006	1
Antxr2	0.504283	0.775415	0.534342	1.76719	0.913515	0.865033	0.00168717	-0.748547	0.309	0.379	1
Anxa1	0.432675	0.729847	0.530173	0.962458	0.877991	0.887285	0.0957792	-0.814873	0.249	0.28	1
Anxa11	0.729836	0.653642	0.553384	0.962458	0.644716	0.620734	0.360348	-0.0502779	0.311	0.26	1
Anxa11os	0.0666669	0.0344319	0.0511995	0	0.0104739	0.0289329	0.0586804	1.16663	0.03	0.01	1
Anxa2	0.882216	0.741195	0.75544	0	0.757076	0.997256	0.522364	-0.275104	0.313	0.312	1
Anxa3	0.864095	0.618371	0.66646	0	0.648638	0.926197	0.701726	-0.294762	0.328	0.309	1
Anxa4	0.927076	0.711679	0.713255	1.76719	0.81669	0.777032	0.654525	-0.142809	0.363	0.318	1
Anxa5	2.02526	1.96921	1.78537	1.76719	2.02997	1.9063	0.211146	-0.132521	0.843	0.81	1
Anxa6	0.558146	0.464006	0.378273	0.962458	0.519213	0.596438	0.214884	-0.442713	0.219	0.241	1
Anxa7	0.694944	0.637518	0.549174	0.962458	0.771966	0.659654	0.877976	-0.344563	0.27	0.257	1
Aoah	1.31319	1.28078	1.27869	0.962458	1.09765	1.09898	0.000662637	0.387011	0.607	0.466	1
Aoc3	0.0724458	0.0193532	0.0115563	0	0.0682421	0	0.683641	-0.570911	0.013	0.01	1
Aopep	0.971333	0.98016	1.064	0	0.776069	0.857615	0.00197106	0.495092	0.436	0.318	1
Ap1ar	0.0888766	0.140605	0.127169	0	0.286273	0.210179	0.176692	-1.07145	0.067	0.09	1
Ap1b1	1.22389	1.39145	1.46679	0.962458	1.33465	1.28406	0.0265103	0.185351	0.678	0.572	1
Ap1g1	0.558889	0.451746	0.500484	0	0.46195	0.464294	0.424019	0.116589	0.249	0.212	1
Ap1g2	0.108208	0.199725	0.160295	0	0.216653	0.139953	0.386979	-0.128626	0.064	0.048	1
Ap1m1	0.458293	0.14497	0.221935	0	0.231744	0.233331	0.286123	0.037776	0.118	0.09	1
Ap1s1	0.264558	0.461701	0.323231	0	0.27948	0.382327	0.162149	0.170165	0.176	0.132	1
Ap1s2	1.18469	0.997728	1.03901	0	0.940146	0.881752	0.000741596	0.320632	0.545	0.373	1
Ap2a1	0.27359	0.285025	0.335039	0	0.157364	0.321266	0.0199841	0.407973	0.167	0.103	1
Ap2a2	1.59624	1.72656	1.75331	0	1.57759	1.74329	0.33482	0.109065	0.796	0.733	1
Ap2b1	0.921301	0.790958	0.76082	0.962458	0.729004	0.627933	0.0665653	0.318283	0.406	0.322	1
Ap2m1	1.19459	0.988665	0.969915	0	1.03391	1.05891	0.528948	-0.0647433	0.496	0.424	1
Ap2s1	1.02974	1.14463	1.07324	0.962458	1.14253	1.10843	0.192079	-0.072806	0.573	0.46	1
Ap3b1	0.728325	0.712503	0.730114	0	0.624686	0.802467	0.22674	0.0285521	0.367	0.299	1
Ap3d1	0.424348	0.437029	0.423628	0.962458	0.343969	0.292398	0.00630248	0.48599	0.208	0.125	1
Ap3m1	0.391444	0.438592	0.370865	0	0.41234	0.4094	0.274384	-0.0528892	0.197	0.158	1
Ap3m2	0.162244	0.0263912	0.0951105	0	0.167934	0.0745137	0.788497	-0.60486	0.045	0.048	1
Ap3s1	0.65903	0.65727	0.670026	0	0.773853	0.664876	0.339316	-0.16608	0.361	0.289	1
Ap3s2	0.111982	0.146912	0.109593	0	0.104614	0.0912017	0.135678	0.329786	0.069	0.042	1
Ap4b1	0.0999441	0.0183759	0.0421799	0	0.0775452	0.0241879	0.296712	-0.281319	0.028	0.016	1
Ap4e1	0.122202	0.099432	0.162321	0	0.088449	0.0526823	0.061018	0.924834	0.058	0.029	1
Ap4m1	0.222525	0.139296	0.12697	0	0.028259	0.0812096	0.00850602	1.44986	0.069	0.026	1
Ap4s1	0.207275	0.376753	0.224866	0	0.28322	0.302612	0.969967	-0.0843186	0.114	0.113	1
Ap5b1	0.0170016	0.0366536	0.0536284	0	0	0.0397447	0.383607	0.982761	0.017	0.01	1
Ap5m1	0.219574	0.276729	0.242518	0.962458	0.0889582	0.143791	0.000522839	1.13557	0.129	0.051	1
Ap5s1	0.0640613	0.25443	0.131154	0	0.0594975	0.210769	0.226734	0.30596	0.067	0.045	1
Ap5z1	0.141732	0.188998	0.102954	0	0.144347	0.0979978	0.453301	0.198849	0.069	0.055	1
Apaf1	0.705725	0.494864	0.562261	0	0.820582	0.533403	0.133467	-0.392665	0.249	0.286	1
Apba1	0.607196	0.563549	0.617831	0	0.582037	0.670277	0.798323	-0.085984	0.255	0.235	1
Apba3	0.0842474	0.0794273	0.100821	0	0.122075	0.0931144	0.990597	-0.269243	0.049	0.048	1
Apbb1	0.0572474	0.0895103	0.0312311	0	0.0930377	0.11417	0.150938	-0.90046	0.024	0.042	1
Apbb1ip	0.854774	0.679979	0.836515	0	0.548761	0.674732	8.5356e-05	0.507873	0.382	0.235	1
Apbb2	0.0311356	0.0514298	0.0420355	0	0.0704098	0.0427093	0.788969	-0.403181	0.026	0.023	1
Apbb3	0.147863	0.0763599	0.086431	0	0.0142396	0	0.00123524	3.23251	0.041	0.003	1
Apeh	0.136209	0.186459	0.0855122	0	0.137887	0.170857	0.810046	-0.263715	0.071	0.064	1
Apex1	0.130789	0.116445	0.228561	0	0.107851	0.14486	0.221126	0.499959	0.082	0.058	1
Apex2	0.0764432	0.0409374	0.128034	0	0.0506819	0.0972666	0.270473	0.284452	0.045	0.029	1
Aph1a	0.427592	0.666461	0.622049	0	0.694303	0.707382	0.755589	-0.269267	0.298	0.264	1
Aph1b	0.21637	0.190021	0.307697	0	0.274847	0.430484	0.348584	-0.549145	0.12	0.138	1
Aph1c	0.28681	0.368682	0.339238	0	0.32017	0.264123	0.154706	0.254337	0.142	0.103	1
Api5	0.475688	0.453521	0.505014	0.962458	0.612076	0.517761	0.898752	-0.306689	0.242	0.222	1
Apip	0.309372	0.179398	0.222395	0.962458	0.134428	0.096103	0.00576899	0.936211	0.105	0.048	1
Aplf	0.0213743	0.0603693	0.0491642	0	0.00928374	0	0.0238356	2.70091	0.024	0.003	1
Aplp2	1.84279	1.34839	1.40127	2.20724	1.47722	1.53169	0.614035	-0.0715316	0.672	0.614	1
Apmap	0.171914	0.245203	0.162224	0	0.157339	0.272648	0.391261	-0.166423	0.105	0.084	1
Apobec3	0.764434	0.769042	0.577909	1.44368	0.752334	0.785518	0.45144	-0.260486	0.313	0.315	1
Apobr	0.175444	0.220223	0.160938	0.962458	0.0599705	0.0570596	0.000405593	1.57771	0.09	0.026	1
Apoc1	0.03618	0.138856	0.0367825	0	0.0127002	0.0161567	0.0233024	2.1535	0.03	0.006	1
Apoc4	0.0384932	0.0566212	0.0213404	0	0	0	0.0203323	3.61343	0.017	0	1
Apold1	0.063244	0.14812	0.0295469	0	0.114633	0.23738	0.0858629	-1.23013	0.026	0.048	1
Apoo	0.0490921	0.0632372	0.023276	0	0.063651	0	0.166365	0.266618	0.028	0.013	1
Apool	0.0179382	0.0834782	0.12215	0	0.0684545	0.238985	0.544885	-0.774296	0.049	0.058	1
Apopt1	0.367204	0.331777	0.339936	0	0.435355	0.443953	0.83513	-0.435622	0.18	0.174	1
App	1.93908	1.87423	1.83389	2.63512	2.13016	2.0551	6.76722e-05	-0.387583	0.833	0.833	1
Appbp2	0.391365	0.499707	0.373257	0	0.505631	0.343695	0.0783993	-0.0331957	0.206	0.145	1
Appl1	0.534852	0.484066	0.299804	0	0.447756	0.390492	0.431969	-0.0565534	0.204	0.17	1
Appl2	0.635381	0.311695	0.296461	0	0.175017	0.28135	0.0049054	0.770362	0.172	0.096	1
Aprt	0.42351	0.501745	0.574651	0.962458	0.548582	0.476579	0.561669	0.0346894	0.255	0.222	1
Aptx	0.0789713	0.0681489	0.111901	0.962458	0.0848314	0.0724642	0.333	0.120137	0.043	0.029	1
Aqp1	0.0425946	0.164614	0.0865024	0	0.0552475	0.188065	0.767592	-0.188391	0.034	0.039	1
Aqp9	0	0.163451	0.123291	0	0.00974401	0.0339568	0.280544	2.36951	0.019	0.01	1
Aqr	0.427376	0.337205	0.306197	0	0.329816	0.298328	0.0195532	0.116463	0.178	0.109	1
Ar	0.0167612	0.0275106	0.0117676	0	0.0625026	0.0451504	0.507616	-1.52389	0.011	0.016	1
Araf	0.533249	0.328288	0.371341	0.962458	0.472372	0.388342	0.767016	-0.218516	0.193	0.174	1
Arap1	1.03499	0.995179	0.984646	1.44368	1.09334	0.994163	0.793037	-0.117129	0.472	0.441	1
Arap2	0.127465	0.095513	0.192492	0	0.124293	0.0973061	0.134534	0.43559	0.064	0.039	1
Arap3	0.184304	0.108517	0.139658	0.962458	0.0611435	0.193288	0.438852	0.0428259	0.062	0.048	1
Arcn1	0.766287	0.592921	0.594846	0	0.710311	0.508539	0.329355	0.0206152	0.309	0.257	1
Areg	0.129295	0.0417705	0.0700398	0	0.0739272	0.0887475	0.994539	-0.228584	0.019	0.019	1
Arel1	0.273529	0.181244	0.137932	0	0.120196	0.0597181	0.0490329	0.978492	0.082	0.045	1
Arf1	1.50798	1.20618	1.0925	1.76719	1.14028	1.14707	0.0277498	0.130424	0.614	0.492	1
Arf2	0.492318	0.536473	0.457089	0	0.670421	0.605861	0.904469	-0.4943	0.255	0.232	1
Arf3	0.623475	0.733447	0.720226	0	0.58411	0.647077	0.0119278	0.285743	0.371	0.254	1
Arf4	1.35432	1.3681	1.43167	0.962458	1.3387	1.74252	0.15411	-0.29073	0.665	0.643	1
Arf5	1.36384	1.53275	1.33667	1.44368	1.50647	1.33359	0.437093	-0.0248726	0.7	0.611	1
Arf6	0.342001	0.747503	0.742316	0	0.856274	0.804446	0.436331	-0.378684	0.341	0.341	1
Arfgap1	0.0781598	0.201006	0.148936	0	0.191316	0.238061	0.637813	-0.489839	0.075	0.084	1
Arfgap2	0.295358	0.278459	0.321434	0	0.216461	0.32795	0.449688	0.174938	0.146	0.122	1
Arfgap3	0.166202	0.206664	0.17558	0	0.184659	0.0687564	0.0288262	0.534292	0.101	0.055	1
Arfgef1	0.700979	0.626853	0.623595	0	0.52578	0.655959	0.0718886	0.148682	0.337	0.251	1
Arfgef2	0.742504	0.831846	0.754495	0.962458	0.642667	0.704309	0.0103679	0.295084	0.403	0.286	1
Arfip1	0.130752	0.222702	0.145336	0	0.23621	0.210955	0.777666	-0.428162	0.084	0.087	1
Arfip2	0.239294	0.278642	0.105624	0	0.174679	0.0542385	0.10065	0.726143	0.067	0.039	1
Arfrp1	0.250514	0.262526	0.288601	0	0.370408	0.229006	0.353266	-0.176477	0.135	0.106	1
Arg2	0.0292485	0.0128223	0.038131	0	0	0.0252986	0.112116	0.968491	0.015	0.003	1
Arglu1	0.599313	0.590708	0.666063	0	0.594216	0.530262	0.0105471	0.214035	0.326	0.225	1
Arhgap1	0.229431	0.328766	0.330257	0	0.406252	0.260075	0.351067	-0.12191	0.17	0.138	1
Arhgap10	0.967694	0.644845	0.501895	0	0.521627	0.434231	0.00112349	0.540287	0.324	0.203	1
Arhgap11a	0.175213	0.260124	0.216907	0.962458	0.217529	0.365518	0.141344	-0.438492	0.084	0.116	1
Arhgap12	0.514182	0.528896	0.511928	0	0.415786	0.618867	0.0748441	-0.00101298	0.264	0.193	1
Arhgap17	0.840719	0.86765	0.991524	0	0.805783	0.887249	0.0643361	0.200698	0.466	0.36	1
Arhgap18	1.12695	1.14735	1.03353	0.962458	0.879059	1.14492	0.0440911	0.161359	0.521	0.415	1
Arhgap19	0.811469	0.494847	0.577347	0.962458	0.424141	0.597599	0.0554318	0.261602	0.258	0.186	1
Arhgap21	0.447014	0.397962	0.18997	0	0.269522	0.21368	0.0575221	0.39836	0.152	0.103	1
Arhgap22	0.768745	0.576731	0.698568	0	0.571314	0.614416	0.0426086	0.240291	0.307	0.232	1
Arhgap23	0.262484	0.229361	0.400699	0	0.398624	0.306434	0.978277	-0.163783	0.139	0.135	1
Arhgap24	0.0585365	0.0859235	0.214144	0	0.00401175	0	0.000260969	4.92451	0.049	0.003	1
Arhgap25	0.225054	0.388224	0.435379	0	0.203002	0.306175	0.00184988	0.706788	0.193	0.106	1
Arhgap26	0.530783	0.398082	0.492067	0	0.318702	0.60266	0.153606	0.00385315	0.215	0.164	1
Arhgap27	0.0358486	0.00921772	0.0514557	0	0.0240466	0.026569	0.198499	0.370342	0.017	0.006	1
Arhgap27os2	0	0.00921772	0.0227172	0	0.0239061	0.0297597	0.362602	-0.85826	0.004	0.01	1
Arhgap29	0	0.0429944	0.0383927	0	0.0656408	0.0326121	0.646848	-0.558219	0.015	0.019	1
Arhgap30	0.984565	0.906048	0.921768	1.44368	0.927971	0.952761	0.0819313	-0.0378902	0.487	0.386	1
Arhgap31	0.921451	0.860956	0.864669	0	0.80939	0.822988	0.271092	0.146506	0.408	0.347	1
Arhgap32	0.024533	0.0072891	0.0344333	0	0.0283885	0	0.384077	0.520603	0.013	0.006	1
Arhgap35	0.194322	0.0858953	0.175869	0	0.0278809	0.107565	0.00549224	1.15987	0.082	0.032	1
Arhgap39	0.198195	0.287063	0.349418	0	0.206528	0.260326	0.018656	0.43904	0.157	0.093	1
Arhgap4	0.11152	0.121021	0.170253	0	0.18903	0.133759	0.701979	-0.190733	0.069	0.074	1
Arhgap45	0.638222	0.783699	0.884773	1.76719	0.741579	0.914622	0.713123	-0.052596	0.393	0.379	1
Arhgap5	0.415805	0.581343	0.674728	0.962458	0.48767	0.43046	0.0115621	0.495066	0.283	0.193	1
Arhgap6	0.362347	0.404413	0.407167	0	0.336578	0.418092	0.104368	0.10115	0.174	0.125	1
Arhgap9	0.548726	0.539574	0.631999	0.962458	0.58546	0.536524	0.384014	0.0761959	0.273	0.235	1
Arhgdia	1.4841	1.595	1.628	2.20724	1.58666	1.4734	0.168382	0.105807	0.762	0.64	1
Arhgdib	1.75169	1.47058	1.47736	1.44368	1.44738	1.31751	0.00503825	0.257555	0.749	0.598	1
Arhgef1	0.508207	0.59206	0.478739	0	0.503101	0.662105	0.808649	-0.196358	0.268	0.257	1
Arhgef10	0.113078	0.129369	0.129485	0	0.0152396	0.0541907	0.000574511	1.85531	0.071	0.016	1
Arhgef10l	0.267038	0.416482	0.313636	0	0.401165	0.481107	0.937974	-0.4285	0.157	0.151	1
Arhgef11	0.389204	0.38957	0.392817	0	0.221703	0.275907	0.00401558	0.758674	0.195	0.113	1
Arhgef12	0.942384	0.638282	0.743463	0	0.573475	0.771411	0.0448445	0.199759	0.371	0.283	1
Arhgef17	0.0211667	0.00738029	0.0479464	0	0.0408754	0.0171413	0.277444	-0.0331205	0.015	0.006	1
Arhgef18	0.0772513	0.0639805	0.0764789	0	0.045254	0.0981107	0.278075	0.00593595	0.036	0.023	1
Arhgef2	0.478583	0.758812	0.757212	0	0.70484	0.607232	0.0547528	0.175481	0.365	0.277	1
Arhgef25	0	0.00810792	0.0038546	0	0.0685434	0.010959	0.0420706	-2.70804	0.004	0.019	1
Arhgef3	1.40237	1.24869	1.41616	0.962458	0.939593	1.37347	0.018327	0.373287	0.597	0.498	1
Arhgef37	0	0.00653029	0.0348345	0	0.00854852	0	0.241359	1.51795	0.011	0.003	1
Arhgef4	0.0435347	0.0459612	0.0141194	0	0	0.0790374	0.878798	-0.393278	0.009	0.01	1
Arhgef40	0.0719451	0.0298021	0.0399718	0	0.0265898	0.11846	0.692667	-0.801091	0.024	0.019	1
Arhgef5	0.153776	0.208272	0.0649604	0	0.154856	0.0511376	0.949536	0.313397	0.049	0.048	1
Arhgef6	1.26747	0.989903	0.94259	1.44368	0.860179	1.04809	0.0119619	0.136999	0.524	0.395	1
Arhgef7	0.162494	0.216352	0.126093	0	0.089453	0.0706465	0.0131584	1.06003	0.088	0.042	1
Arid1a	0.640829	0.781933	0.841704	0	0.715128	0.888416	0.605785	-0.0266851	0.384	0.341	1
Arid1b	0.73146	0.846502	0.866818	0	0.628917	0.689289	0.000149167	0.498324	0.444	0.283	1
Arid2	0.485832	0.450813	0.530298	0	0.319783	0.443983	0.000340304	0.465677	0.253	0.135	1
Arid3a	0.0810169	0.2219	0.372085	0	0.204074	0.224219	0.0589602	0.427298	0.114	0.071	1
Arid3b	0.0719354	0.0891446	0.144151	0	0.0425633	0.112657	0.13398	0.563403	0.052	0.029	1
Arid4a	0.514267	0.569846	0.630013	0	0.618067	0.54506	0.531846	0.0288983	0.285	0.254	1
Arid4b	0.50233	0.520117	0.783348	0	0.465946	0.563967	0.00438217	0.462342	0.326	0.222	1
Arid5a	0.69897	0.864728	0.552489	0	0.842212	0.694862	0.718384	-0.214265	0.324	0.312	1
Arid5b	0.759222	0.771043	0.791	0	0.672034	0.676457	0.0115398	0.295763	0.376	0.273	1
Arih1	1.20083	1.17177	1.21241	0	1.07846	1.25458	0.185194	0.0641717	0.584	0.486	1
Arih2	0.560403	0.719888	0.731984	0	0.680681	0.679119	0.0195165	0.0676214	0.354	0.248	1
Arl1	0.700596	0.406767	0.329587	0	0.460112	0.371243	0.194144	0.0277968	0.225	0.17	1
Arl10	0.112707	0.0235435	0.0923558	0	0.0325472	0.0191064	0.0256685	1.38168	0.041	0.013	1
Arl11	0.33179	0.209787	0.430892	0	0.181869	0.239513	0.000436547	0.79803	0.174	0.08	1
Arl13b	0.315063	0.26206	0.305767	1.44368	0.218617	0.232138	0.0626613	0.364001	0.15	0.1	1
Arl14ep	0.0564909	0.0887963	0.190169	0	0.0835537	0.048375	0.0254295	1.02856	0.056	0.023	1
Arl15	0.60906	0.659845	0.756827	0	0.469125	0.669342	0.0308403	0.401657	0.309	0.232	1
Arl16	0.118478	0.0454577	0.0247354	0	0.0341304	0.0247402	0.224331	0.612418	0.03	0.016	1
Arl2	0.328424	0.276549	0.280787	0	0.21423	0.275967	0.215976	0.26014	0.139	0.106	1
Arl2bp	0.182545	0.15437	0.119847	0.962458	0.120461	0.0929753	0.311192	0.35312	0.077	0.058	1
Arl3	0.235369	0.301369	0.346031	0	0.244689	0.381221	0.761679	0.00318381	0.146	0.135	1
Arl4a	0.339531	0.32699	0.418311	0.962458	0.260411	0.295564	0.0687383	0.481128	0.174	0.125	1
Arl4d	0.110554	0.193273	0.296872	0.962458	0.0643598	0.127655	0.0335786	1.29186	0.088	0.048	1
Arl5a	0.314341	0.31075	0.294262	0	0.347057	0.473398	0.324658	-0.513225	0.159	0.177	1
Arl5b	0.386974	0.457838	0.508004	0	0.31716	0.292017	0.000120339	0.755187	0.225	0.109	1
Arl5c	0.0167612	0.0920448	0.080666	0.962458	0.0275564	0.0687692	0.277112	0.482869	0.036	0.023	1
Arl6	0.0394536	0.0577251	0.0321568	0	0.0679642	0	0.225208	0.204023	0.026	0.013	1
Arl6ip1	1.52767	1.20792	1.38408	1.44368	1.37586	1.50924	0.774217	-0.174893	0.665	0.601	1
Arl6ip4	0.27875	0.393177	0.38204	0	0.276547	0.289648	0.0113011	0.452226	0.182	0.109	1
Arl6ip5	0.201416	0.13164	0.178833	0	0.169054	0.117653	0.169978	0.210357	0.094	0.064	1
Arl6ip6	0.314894	0.347291	0.277956	0	0.291108	0.303691	0.109777	0.0624956	0.148	0.103	1
Arl8a	0.985609	1.1022	0.84756	0	1.07764	1.07106	0.392971	-0.242344	0.485	0.473	1
Arl8b	0.830793	0.629179	0.757282	0	0.661991	0.60701	0.119417	0.268669	0.348	0.277	1
Armc1	0.233371	0.345238	0.279521	0	0.342969	0.324421	0.866135	-0.201472	0.155	0.145	1
Armc10	0.0856877	0.104325	0.179597	0	0.137016	0.0748542	0.0570256	0.382004	0.069	0.035	1
Armc2	0.062542	0.0326526	0.083652	0	0.0693708	0.0695939	0.97446	-0.164014	0.032	0.032	1
Armc3	0.0704598	0.123324	0.0490067	0	0.160472	0.107622	0.445722	-0.80728	0.041	0.051	1
Armc5	0.0925347	0.134155	0.0961578	0	0.146724	0.13383	0.979455	-0.388098	0.049	0.048	1
Armc6	0.0237483	0.0131663	0.0861611	0	0	0.0148503	0.0352708	2.39368	0.021	0.003	1
Armc7	0.0605331	0.214627	0.176701	0	0.0917074	0.180554	0.264408	0.36559	0.079	0.058	1
Armc8	0.321614	0.303326	0.408154	0	0.469942	0.431461	0.681179	-0.398376	0.176	0.177	1
Armc9	0.0504174	0.0678289	0.0742865	0	0.117562	0.107608	0.774707	-0.747104	0.039	0.042	1
Armcx1	0.0512433	0	0.0108585	0	0.0276169	0.0263413	0.872514	-0.943141	0.009	0.01	1
Armcx2	0.0586146	0.0609892	0	0	0.0641208	0.0169452	0.478032	-0.432721	0.013	0.019	1
Armcx3	0.582797	0.529184	0.397912	0	0.524004	0.520764	0.670676	-0.167276	0.217	0.19	1
Armcx5	0.0332035	0.109078	0.0444503	0	0.0471081	0	0.0873504	1.32354	0.032	0.013	1
Armcx6	0	0.0462788	0.0237842	0	0.0421955	0.0720224	0.701407	-1.00761	0.013	0.016	1
Armh3	0.175197	0.227545	0.338949	0	0.133042	0.164473	0.0201021	0.977223	0.118	0.068	1
Armh4	0.0288427	0.0072891	0.0148919	0	0.0127731	0.03919	0.880371	-0.79935	0.009	0.01	1
Armt1	0.0862079	0.0249681	0.0585602	0	0	0.0278991	0.0340999	1.70372	0.028	0.006	1
Arntl	0.355298	0.329267	0.501473	0	0.246594	0.4304	0.0170095	0.372508	0.202	0.125	1
Arntl2	0	0	0	0	0.0230754	0	0.0338884	-2.82678	0	0.01	1
Arpc1a	0.550688	0.657241	0.634894	0.962458	0.677144	0.473013	0.0861907	0.140115	0.311	0.241	1
Arpc1b	1.90367	1.70312	1.77155	1.44368	1.60015	1.61919	0.000986233	0.286056	0.818	0.717	1
Arpc2	2.26392	2.21209	2.2954	2.20724	2.24065	2.33197	0.641676	-0.0382316	0.927	0.894	1
Arpc3	1.76477	1.64786	1.7226	2.01123	1.66396	1.50769	0.0194499	0.19784	0.788	0.695	1
Arpc4	0.869269	1.08433	1.13141	0	1.14605	1.3844	0.149419	-0.395576	0.541	0.524	1
Arpc5	1.88118	1.58866	1.64465	1.76719	1.56621	1.41682	0.000333556	0.308206	0.788	0.63	1
Arpc5l	0.339461	0.251483	0.364269	0	0.365585	0.307582	0.469714	-0.0795579	0.17	0.141	1
Arpin	0.0295964	0.0721873	0.0933684	0	0.101917	0.0592053	0.424732	-0.113391	0.036	0.026	1
Arpp19	1.00168	0.991502	0.911266	0.962458	0.902043	1.01564	0.573272	-0.0104847	0.491	0.424	1
Arrb1	0.395819	0.523046	0.443838	0.962458	0.481286	0.702335	0.569949	-0.460646	0.251	0.248	1
Arrb2	1.11271	1.06399	1.11404	0	1.03648	1.02495	0.0456784	0.148357	0.545	0.434	1
Arrdc1	0.265764	0.453566	0.506259	0.962458	0.26468	0.263798	0.000165698	0.892031	0.212	0.103	1
Arrdc2	0.0781255	0.152704	0.159038	0	0.12602	0.100359	0.130271	0.353737	0.069	0.042	1
Arrdc3	0.433595	0.818495	0.843407	0.962458	0.59457	0.495697	0.000187631	0.684288	0.29	0.167	1
Arrdc4	0.357923	0.354727	0.333258	0	0.333074	0.449981	0.715505	-0.216125	0.174	0.154	1
Arsa	0.164536	0.192166	0.220797	0	0.270852	0.210117	0.706577	-0.28807	0.109	0.096	1
Arsb	0.733208	0.679978	0.861524	1.76719	0.932975	0.903014	0.0903199	-0.357464	0.333	0.37	1
Arsg	0.121345	0.0879346	0.137076	0	0.0454847	0.0123634	0.00180807	1.93726	0.058	0.013	1
Arsk	0.381622	0.341498	0.27521	0.962458	0.279045	0.376645	0.202347	-0.077409	0.167	0.125	1
Art3	0.193407	0.110571	0.0543811	0	0.0604216	0.0207864	0.0538288	1.20154	0.041	0.016	1
Art4	0	0	0.0251022	0	0.0650828	0	0.361362	-1.36916	0.004	0.01	1
Arv1	0	0.0125218	0.0273191	0	0.0241861	0.0421685	0.892396	-0.85945	0.011	0.01	1
Arvcf	0.0210644	0.0529971	0.0610903	0	0.111893	0.027741	0.227603	-0.484743	0.03	0.016	1
As3mt	0.418967	0.195825	0.215014	0	0.286054	0.234752	0.378759	-0.11398	0.12	0.096	1
Asah1	1.58097	1.31021	1.39605	1.44368	1.2945	1.3233	0.0470181	0.175361	0.674	0.592	1
Asah2	0.13285	0.135137	0.121302	0	0.0522789	0.117317	0.039257	0.610146	0.062	0.029	1
Asap1	0.970985	0.657818	0.701272	0	0.635777	0.860313	0.453479	-0.0399633	0.382	0.331	1
Asap2	0	0.0343983	0.0276591	0	0.0457368	0.0556441	0.17892	-0.962448	0.015	0.029	1
Asap3	0	0.0209436	0.0346108	0	0	0	0.0672115	3.06211	0.011	0	1
Asb1	0.0429017	0.0420232	0.0786529	0	0.0092631	0.015485	0.0234644	2.05047	0.03	0.006	1
Asb10	0.205957	0.128081	0.13644	0	0.112756	0.256954	0.28375	-0.38136	0.073	0.051	1
Asb13	0.406786	0.146646	0.0768228	0	0.164439	0.0585406	0.3572	0.505219	0.064	0.048	1
Asb2	0.0695824	0.0388224	0.030279	0	0.0437331	0	0.114673	0.698575	0.026	0.01	1
Asb3	0.319321	0.188924	0.221496	0	0.102202	0.114831	0.00112286	1.12898	0.118	0.048	1
Asb4	0	0.0401426	0.0946239	0	0	0.0486213	0.0693045	1.25981	0.024	0.006	1
Asb5	0	0.00876345	0.00543757	0	0.0104389	0.0346996	0.357656	-1.69795	0.004	0.01	1
Asb6	0.0167612	0.0304436	0.0618574	0	0.140709	0.107776	0.0584521	-1.5311	0.021	0.045	1
Asb7	0.065433	0.120146	0.14683	0	0.0252683	0.0878205	0.00839074	1.15706	0.064	0.023	1
Asb8	0.110902	0.159726	0.213519	0	0.226807	0.119478	0.709208	0.0213788	0.075	0.068	1
Ascc1	0.202734	0.221959	0.240581	0	0.173232	0.121611	0.00858805	0.665806	0.12	0.061	1
Ascc2	0.084948	0.293806	0.253155	0	0.1775	0.129492	0.13047	0.707195	0.088	0.058	1
Ascc3	0.766505	0.665672	0.658181	0	0.768064	0.530654	0.0477743	0.0577717	0.35	0.26	1
Asf1a	0.0944426	0.0606754	0.144747	0	0.128451	0.130565	0.599649	-0.277964	0.058	0.048	1
Asf1b	0.0797921	0.0786295	0.0563154	0	0.0165249	0.048219	0.733459	1.0239	0.019	0.016	1
Asgr2	0.0595306	0.0740338	0.106413	0	0.190084	0.125261	0.616522	-0.899847	0.039	0.045	1
Ash1l	0.606113	0.882188	0.960369	0	0.763651	0.817003	0.0127121	0.242385	0.448	0.334	1
Ash2l	0.29961	0.180964	0.306675	0.962458	0.382846	0.190423	0.376344	-0.204455	0.129	0.103	1
Asl	0.0508694	0.150668	0.187921	0	0.148404	0.18704	0.844018	-0.129126	0.075	0.077	1
Asmt	0	0.0356424	0.0741257	0	0.0103594	0.0586202	0.21918	0.482167	0.026	0.013	1
Asna1	0.373945	0.166881	0.285907	0	0.292937	0.314069	0.776085	-0.246517	0.124	0.113	1
Asns	0.243102	0	0	0	0.0224505	0.0177668	0.569936	0.961597	0.009	0.013	1
Asnsd1	0.311443	0.210962	0.270877	0	0.209247	0.152979	0.0287366	0.542495	0.124	0.074	1
Aspa	0.0728441	0.282207	0.227055	0	0.212084	0.283795	0.430076	-0.15926	0.092	0.074	1
Asph	0.335523	0.313361	0.351233	0	0.372232	0.205592	0.132077	0.21561	0.146	0.106	1
Aspn	0	0.0379821	0.0636708	0	0.0261603	0.0769018	0.540562	-0.207207	0.011	0.006	1
Aspscr1	0.106641	0.227475	0.14897	0	0.123641	0.179215	0.168096	0.1854	0.09	0.061	1
Asrgl1	0.0411676	0.0403355	0.0649249	0	0.025727	0.0125994	0.153714	1.30495	0.024	0.01	1
Aste1	0.0784802	0.14014	0.131111	0	0.241467	0.120186	0.28896	-0.588177	0.054	0.071	1
Asxl1	0.368726	0.418233	0.627216	0	0.351488	0.482678	0.0198746	0.396404	0.255	0.174	1
Asxl2	0.389819	0.49693	0.496984	0	0.445108	0.502111	0.123176	0.0308886	0.258	0.193	1
Asxl3	0.0255634	0	0.031006	0	0	0	0.0672115	2.75681	0.011	0	1
Atad1	0.369065	0.358047	0.304462	0.962458	0.30172	0.352094	0.141871	0.0195145	0.18	0.132	1
Atad2	0.253458	0.221496	0.128223	0	0.0637551	0.190671	0.11772	0.544877	0.077	0.048	1
Atad2b	0.558424	0.537168	0.480703	0.962458	0.307986	0.396441	0.00160536	0.650794	0.227	0.132	1
Atad3a	0.0850622	0.0331369	0.384151	0	0.0426414	0.0291761	0.0120864	2.69374	0.056	0.019	1
Atad5	0.100602	0.0179238	0.029798	0	0.0738222	0.0722552	0.387311	-0.972551	0.026	0.016	1
Atat1	0.0636549	0.0737	0.0619154	0	0.0576745	0.0720371	0.920863	0.0192518	0.028	0.029	1
Ate1	0.281573	0.28149	0.282895	0	0.290647	0.222792	0.0201046	0.143502	0.146	0.084	1
Atf1	0.468164	0.324404	0.374732	0	0.515055	0.35357	0.996022	-0.286974	0.197	0.183	1
Atf2	0.571719	0.653118	0.40428	0.962458	0.3567	0.45741	0.00764925	0.443664	0.26	0.167	1
Atf3	1.6324	2.03093	1.81098	2.20724	2.05194	2.24637	0.00136567	-0.469478	0.708	0.743	1
Atf4	1.37318	1.45168	1.49728	0.962458	1.44733	1.47598	0.860113	0.0042755	0.667	0.637	1
Atf5	0.119962	0.093151	0.180686	0	0.271776	0.0797758	0.711013	-0.406544	0.058	0.051	1
Atf6	0.782626	0.688898	0.808979	0.962458	0.821834	0.720286	0.533504	-0.0291226	0.365	0.322	1
Atf6b	0.23481	0.257314	0.234941	0	0.19703	0.3581	0.654286	-0.221599	0.112	0.096	1
Atf7	0.598821	0.537558	0.680217	0.962458	0.426419	0.662083	0.000300241	0.227196	0.335	0.186	1
Atf7ip	0.576989	0.634705	0.628328	0.962458	0.471788	0.597293	0.023663	0.280905	0.294	0.212	1
Atg10	0.507741	0.576651	0.596501	0	0.348254	0.55822	0.0199331	0.433872	0.264	0.186	1
Atg101	0.175774	0.197208	0.240126	0	0.101636	0.214907	0.030979	0.478578	0.118	0.068	1
Atg12	0.261156	0.259065	0.373779	0	0.237406	0.203737	0.0166685	0.587264	0.146	0.087	1
Atg13	0.399173	0.161993	0.131082	0	0.152289	0.149809	0.108235	0.343692	0.084	0.051	1
Atg14	0.185866	0.138565	0.11065	0.962458	0.150134	0.166823	0.496356	-0.315797	0.069	0.055	1
Atg16l1	0.222121	0.304323	0.27503	0	0.289695	0.338911	0.493388	-0.204698	0.127	0.106	1
Atg16l2	0.091984	0.203769	0.145999	0	0.29884	0.145186	0.921238	-0.569041	0.075	0.071	1
Atg2a	0.197342	0.453947	0.529384	0.962458	0.379765	0.45918	0.0931059	0.139565	0.234	0.174	1
Atg2b	0.139321	0.145222	0.152727	0	0.182116	0.119523	0.166088	-0.0489074	0.075	0.048	1
Atg3	0.72003	0.614893	0.577031	0	0.500968	0.680456	0.0387253	0.0738975	0.324	0.235	1
Atg4a	0	0.117969	0.200374	0	0.0220069	0.18205	0.04943	0.481818	0.069	0.035	1
Atg4b	0.435564	0.152083	0.22691	0	0.2585	0.331593	0.823508	-0.344303	0.112	0.103	1
Atg4c	0.248087	0.128209	0.333731	0	0.220426	0.117238	0.0549322	0.606399	0.105	0.064	1
Atg4d	0.015231	0.08936	0.135296	0	0.0751512	0.159455	0.506207	-0.224611	0.054	0.042	1
Atg5	0.452084	0.408903	0.35364	0	0.485053	0.325518	0.117818	-0.0930636	0.206	0.151	1
Atg7	0.482991	0.453152	0.561398	0	0.389925	0.36037	0.000858311	0.552347	0.258	0.148	1
Atg9a	0.0498959	0.0952608	0.190709	0	0.139064	0.0960192	0.371258	0.207589	0.064	0.048	1
Atic	0.0363015	0.179342	0.169635	0	0.178007	0.106068	0.281744	0.090165	0.079	0.058	1
Atl2	0.245464	0.170823	0.261828	0	0.265958	0.21651	0.394355	-0.0970413	0.109	0.087	1
Atl3	0.723785	0.645351	0.701065	1.44368	0.549195	0.814833	0.0446459	-0.0146682	0.348	0.257	1
Atm	0.144436	0.106787	0.108588	0	0.114652	0.124494	0.293888	-0.0806556	0.06	0.042	1
Atmin	0.266866	0.334779	0.22182	0	0.19949	0.26447	0.0254137	0.246771	0.133	0.077	1
Atn1	0.266272	0.20233	0.174638	0.962458	0.183159	0.225539	0.533478	-0.0698382	0.103	0.087	1
Atox1	1.35787	1.62625	1.46026	0.962458	1.62646	1.39287	0.411974	-0.0225793	0.71	0.614	1
Atp10a	0	0.0254485	0.0656502	0	0.00800747	0	0.0512681	2.59787	0.019	0.003	1
Atp11a	0.116057	0.114057	0.177659	0	0.151051	0.0911131	0.134155	0.260802	0.077	0.048	1
Atp11b	0.511703	0.295395	0.306644	0	0.385641	0.231521	0.116782	0.125966	0.187	0.138	1
Atp11c	0.696924	0.660853	0.597101	0.962458	0.416747	0.468198	0.0119165	0.663994	0.281	0.203	1
Atp13a1	0.322566	0.151186	0.140193	0	0.283808	0.220137	0.722066	-0.586754	0.094	0.084	1
Atp13a2	0.551064	0.67056	0.662983	0	0.490965	0.73045	0.0347947	0.109573	0.337	0.241	1
Atp13a3	0.848197	0.832231	0.694099	1.44368	0.653612	0.677684	0.00758574	0.280383	0.388	0.27	1
Atp1a1	1.38519	1.43154	1.50975	2.20724	1.38377	1.3646	0.0584056	0.161215	0.71	0.595	1
Atp1a2	0.0542937	0.0150765	0.0362024	0	0.100334	0.0440309	0.808137	-1.20202	0.017	0.019	1
Atp1b1	0.0311356	0.0537255	0.0932311	0	0.0249451	0.0621808	0.370572	0.659757	0.026	0.016	1
Atp1b3	1.56971	1.45061	1.29529	1.44368	1.19579	1.41726	0.0310353	0.172679	0.67	0.553	1
Atp23	0	0.0314607	0.0485588	0	0.0164944	0.0342814	0.517299	0.401849	0.015	0.01	1
Atp2a2	1.03582	0.845502	0.809037	0	0.950959	0.930074	0.794417	-0.190103	0.453	0.399	1
Atp2a3	0	0.103554	0.0377791	0	0.0361241	0.05418	0.930663	0.273764	0.024	0.023	1
Atp2b1	2.05006	2.0769	1.88643	2.37106	2.00218	2.10089	0.313522	-0.115274	0.873	0.836	1
Atp2b4	0.069276	0.0347069	0.0619571	0	0.164358	0.0285339	0.54759	-0.928773	0.028	0.035	1
Atp2c1	0.617761	0.555309	0.653944	0	0.620561	0.505862	0.0457034	0.15746	0.315	0.232	1
Atp5a1	1.4424	1.25029	1.39483	1.44368	1.43913	1.25793	0.362635	-0.00274241	0.678	0.608	1
Atp5b	1.19533	1.07672	0.992444	1.44368	1.13297	0.969376	0.195102	-0.00492527	0.552	0.469	1
Atp5c1	1.07483	0.795045	1.00525	0	0.797438	0.922309	0.0592778	0.21906	0.494	0.395	1
Atp5d	0.638369	0.965128	0.889964	0	1.00298	1.01965	0.427896	-0.300668	0.47	0.447	1
Atp5e	1.74718	2.05451	1.9092	2.51178	2.11927	2.10605	0.000453672	-0.29061	0.833	0.836	1
Atp5f1	1.13342	1.05778	1.02581	0	1.04237	0.896735	0.0907975	0.185149	0.543	0.447	1
Atp5g1	0.753913	0.887813	0.839446	0.962458	0.876796	0.788507	0.192449	0.0197823	0.429	0.354	1
Atp5g2	1.14245	1.52498	1.52478	1.76719	1.73079	1.58317	0.00105461	-0.345504	0.71	0.752	1
Atp5g3	0.879532	1.0386	1.09872	0	1.19771	1.17846	0.180816	-0.302128	0.502	0.492	1
Atp5h	1.22613	1.57356	1.50188	1.44368	1.57959	1.53067	0.270514	-0.122771	0.71	0.695	1
Atp5j	1.34064	1.15427	1.04579	0.962458	1.18189	1.18892	0.549386	-0.102574	0.567	0.534	1
Atp5j2	1.12154	1.34918	1.41345	0.962458	1.48055	1.50356	0.0302585	-0.268566	0.678	0.678	1
Atp5k	1.00985	1.09245	1.15159	2.01123	1.10568	1.26547	0.384397	-0.170813	0.562	0.531	1
Atp5l	1.48564	1.76946	1.6867	0.962458	1.84895	1.78381	0.0251547	-0.22392	0.796	0.781	1
Atp5md	0.901813	1.11811	1.22914	0.962458	1.25052	1.19225	0.57201	-0.161563	0.564	0.55	1
Atp5mpl	1.10406	1.36381	1.18579	0.962458	1.43648	1.26979	0.177547	-0.235009	0.637	0.633	1
Atp5o	0.770481	0.721217	0.77357	0	0.65952	0.811967	0.205099	0.0549477	0.371	0.302	1
Atp6ap1	1.25501	1.01706	0.935949	1.44368	1.04247	1.04485	0.779562	-0.054013	0.517	0.489	1
Atp6ap2	1.16874	1.26846	1.03489	0.962458	1.26399	1.26228	0.902213	-0.245425	0.594	0.514	1
Atp6v0a1	1.74036	1.19071	1.22617	0	1.06409	1.41215	0.12548	0.141532	0.594	0.514	1
Atp6v0a2	0.21774	0.170502	0.160522	0.962458	0.215734	0.188224	0.738859	-0.278877	0.094	0.084	1
Atp6v0b	1.71345	1.76253	1.74633	0.962458	1.82588	1.92069	0.051416	-0.214257	0.822	0.791	1
Atp6v0c	2.02219	2.07977	2.06401	2.63512	2.15921	2.26659	0.0259245	-0.247482	0.869	0.865	1
Atp6v0d1	1.23299	1.24384	1.22142	1.44368	1.11669	1.36615	0.395651	-0.030517	0.633	0.524	1
Atp6v0d2	0.0954183	0.168008	0.122633	0	0.162324	0.078692	0.998551	0.13199	0.045	0.045	1
Atp6v0e	1.25257	1.16879	1.23212	0	1.3889	1.26345	0.253271	-0.22912	0.622	0.592	1
Atp6v1a	1.94	1.55785	1.64304	1.44368	1.63073	1.58676	0.0422056	0.106689	0.764	0.65	1
Atp6v1b2	0.92861	0.861897	0.81083	0.962458	1.0174	0.856316	0.92815	-0.231124	0.416	0.379	1
Atp6v1c1	0.924739	0.697519	0.542762	0	0.640147	0.612457	0.0391111	0.124563	0.35	0.257	1
Atp6v1d	0.852089	0.807599	0.587424	0	0.729512	0.532278	0.00315362	0.221274	0.358	0.235	1
Atp6v1e1	1.12521	1.01823	1.21218	0.962458	1.13625	1.09943	0.513051	0.033789	0.556	0.482	1
Atp6v1f	1.15403	1.34124	1.38273	1.44368	1.18157	1.36236	0.069018	0.120478	0.7	0.556	1
Atp6v1g1	1.45388	1.49445	1.39731	0	1.52194	1.44402	0.50345	-0.0778751	0.695	0.669	1
Atp6v1g2	0.0547075	0.0504568	0.0870132	0	0.081608	0.111189	0.909545	-0.489476	0.034	0.032	1
Atp6v1h	0.701746	0.886346	0.731301	0	0.656415	0.659176	0.00126955	0.357292	0.388	0.251	1
Atp7a	0.561349	0.296359	0.482444	0.962458	0.321168	0.635021	0.00609023	-0.206143	0.236	0.141	1
Atp8a1	0.601138	0.735489	0.670628	0	0.554263	0.597915	0.00908037	0.335071	0.345	0.248	1
Atp8a2	0.0435347	0	0	0	0.0432109	0	0.15411	-1.49325	0.002	0.01	1
Atp8b1	0.0157898	0.045845	0.0431254	0.962458	0.0104739	0.122561	0.288775	-0.844125	0.015	0.026	1
Atp8b2	0	0.0230709	0.0296996	0	0.101531	0.133535	0.0355378	-2.33884	0.015	0.039	1
Atp8b4	0.140416	0.254788	0.428557	0	0.233671	0.25784	0.192123	0.477367	0.135	0.103	1
Atp9b	0.635122	0.524213	0.507343	0	0.416767	0.540102	0.0422607	0.205724	0.268	0.196	1
Atpaf1	0.0921619	0.065288	0.0972262	1.44368	0.130427	0.0444766	0.174777	-0.23276	0.045	0.026	1
Atpaf2	0.113184	0.138834	0.0778148	0	0.0729044	0.0871379	0.172141	0.393767	0.054	0.032	1
Atpif1	1.18016	1.41638	1.54616	0.962458	1.59551	1.55972	0.138035	-0.234137	0.685	0.666	1
Atpsckmt	0.133127	0.117565	0.134171	0	0.0934963	0.112184	0.271725	0.325426	0.064	0.045	1
Atr	0.278775	0.0655168	0.214875	0	0.142262	0.110363	0.858757	0.494931	0.058	0.055	1
Atraid	0.510127	0.57894	0.5446	0	0.630417	0.444795	0.251363	0.0247575	0.29	0.235	1
Atrip	0.0935307	0.0463506	0.0608647	0	0.0431907	0.0156265	0.28246	0.958767	0.028	0.016	1
Atrn	0.125719	0.0916083	0.194174	0	0.080363	0.115187	0.0862791	0.626141	0.073	0.042	1
Atrx	1.23609	0.971911	0.96288	0.962458	0.973978	0.88258	0.0274833	0.19294	0.496	0.383	1
Atxn1	0.751633	0.780669	1.00014	0	0.798934	0.885923	0.125992	0.124056	0.431	0.338	1
Atxn10	0.212456	0.341192	0.266526	0	0.260443	0.284959	0.139487	0.0747176	0.15	0.109	1
Atxn1l	0.216557	0.233863	0.156274	0	0.146612	0.174315	0.261931	0.29181	0.092	0.068	1
Atxn2	0.60436	0.408567	0.488116	0.962458	0.65296	0.435095	0.830949	-0.266186	0.255	0.232	1
Atxn2l	0.74544	0.610043	0.603503	0	0.744247	0.698249	0.958343	-0.268378	0.318	0.286	1
Atxn3	0.286008	0.330782	0.345404	0	0.231876	0.421639	0.19941	0.015335	0.159	0.119	1
Atxn7	0.615271	0.562551	0.739874	0	0.608654	0.637925	0.2303	0.119848	0.309	0.254	1
Atxn7l2	0.0207379	0.0108552	0.0258764	0	0.00598704	0.0207864	0.535299	0.432012	0.011	0.006	1
Atxn7l3	0.307361	0.139734	0.243969	0	0.175842	0.197494	0.0662015	0.254917	0.118	0.074	1
Atxn7l3b	0.62217	0.735142	0.623483	0.962458	0.810374	0.776637	0.49076	-0.366289	0.341	0.334	1
AU019990	0.0300472	0.165224	0.0713322	0	0.0616525	0.00931452	0.070372	1.39227	0.039	0.016	1
AU020206	0.346383	0.393237	0.424413	0.962458	0.222071	0.293054	0.000962169	0.723173	0.189	0.096	1
AU022252	0.0150965	0.139776	0.105183	0	0.128184	0.0777357	0.11411	-0.0131892	0.054	0.029	1
AU022793	0.0179382	0.0415178	0.036127	0	0.0840293	0.0523877	0.17217	-0.969297	0.017	0.032	1
AU040320	0.170699	0.145229	0.196166	0	0.193432	0.291026	0.368012	-0.516608	0.097	0.074	1
AU041133	0.0256264	0.0135374	0.0410072	0	0.0107293	0.0422204	0.640774	0.0963236	0.017	0.013	1
Auh	0.352831	0.310205	0.319382	0	0.321774	0.279984	0.250274	0.106416	0.152	0.119	1
Aup1	0.723613	0.51564	0.602851	0	0.647476	0.529441	0.300242	0.00878038	0.315	0.27	1
Aurkaip1	0.171255	0.475883	0.441452	0	0.447444	0.349733	0.300614	0.0632982	0.221	0.183	1
Aurkb	0.0408304	0.0572698	0.0199374	0	0.0349106	0.0563273	0.992355	-0.332014	0.019	0.019	1
Auts2	0.50849	0.351471	0.293847	0	0.525131	0.643773	0.000417827	-0.910679	0.107	0.196	1
AV099323	0.0790939	0.0455511	0.0450278	0.962458	0	0.082128	0.376101	0.123673	0.026	0.016	1
AV356131	0	0.0278542	0.0684074	0	0.0669076	0.0125994	0.999333	0.0594003	0.013	0.013	1
Aven	0.110503	0.101538	0.0724234	0	0.0917091	0.0636896	0.408641	0.171496	0.052	0.039	1
Avl9	0.310346	0.20053	0.301796	0	0.310074	0.315121	0.438913	-0.24761	0.137	0.113	1
Avpi1	0.182126	0.170063	0.16255	0	0.154889	0.0722376	0.0967077	0.562952	0.079	0.048	1
AW011738	0.0306615	0.0211364	0	0	0.0410468	0.0195663	0.613859	-1.23607	0.006	0.01	1
AW046200	0.0361693	0.0236099	0.0604394	0	0.01093	0.0483809	0.155766	0.518957	0.024	0.01	1
AW112010	0.258987	0.441812	0.290911	0	0.431663	0.209931	0.17639	0.0565275	0.15	0.113	1
AW146154	0.0150965	0.0610115	0.0724828	0	0.0268373	0.0118513	0.0581663	1.46787	0.03	0.01	1
AW209491	0.0338621	0.022582	0.0930764	0	0.0553383	0.0825139	0.990037	-0.219356	0.026	0.026	1
AW549877	0.336276	0.310964	0.294984	0	0.354625	0.422584	0.517182	-0.395265	0.15	0.161	1
AW554918	0.328245	0.445365	0.476022	0	0.143958	0.390865	0.000100558	0.835953	0.208	0.096	1
Axin1	0.313329	0.291204	0.307544	0	0.30677	0.224979	0.298023	0.200487	0.157	0.125	1
Axl	0.388318	0.428684	0.514643	0.962458	0.394414	0.304262	0.000467118	0.474046	0.197	0.1	1
Azi2	0.457544	0.524776	0.510337	0	0.637484	0.564816	0.695505	-0.321103	0.264	0.232	1
Azin1	0.927116	0.854734	0.802097	0.962458	0.821525	0.824084	0.196231	0.0449967	0.412	0.341	1
Azin2	0	0.0253472	0.0457398	0	0.0514015	0.0544215	0.856349	-0.748404	0.021	0.019	1
B020010K11Rik	0.0553042	0.00876345	0	0	0.0148379	0.0443533	0.554832	-1.20141	0.009	0.013	1
B130055M24Rik	0.060964	0.0218671	0.0507555	0	0.0695439	0.0524369	0.798371	-0.543365	0.026	0.023	1
B230118H07Rik	0.152316	0.0990859	0.153031	0	0.0806022	0.100657	0.238677	0.582539	0.054	0.035	1
B230216N24Rik	0.0628815	0.0505136	0	0	0.0236677	0.012597	0.516218	0.497899	0.015	0.01	1
B230217O12Rik	0.0517304	0.0124679	0.07866	0	0	0.0266856	0.19159	1.76288	0.017	0.006	1
B230219D22Rik	0.813497	0.6812	0.676352	0	0.731923	0.807252	0.876307	-0.184872	0.361	0.325	1
B230307C23Rik	0.0465997	0.152987	0.170394	0	0.176808	0.152681	0.480321	-0.198579	0.069	0.055	1
B230354K17Rik	0.218156	0.0377391	0.087146	0	0.0379463	0	0.0210792	2.09957	0.036	0.01	1
B230369F24Rik	0.0739978	0.0460059	0.0253933	0	0.0310317	0.0491969	0.697423	-0.0100397	0.024	0.019	1
B3galnt1	0.584525	0.431129	0.537271	0.962458	0.442849	0.599867	0.912496	-0.0533595	0.258	0.238	1
B3galnt2	0.159513	0.221898	0.133602	0	0.124715	0.101053	0.0685642	0.604384	0.071	0.039	1
B3galt1	0.0173309	0.0394957	0.0948669	0	0.0953743	0.0593414	0.642634	-0.309841	0.015	0.019	1
B3galt4	0.0204988	0.00686266	0.029388	0	0.03261	0	0.885025	0.150627	0.011	0.01	1
B3galt6	0.0416988	0.0462503	0.0708405	0	0.0791205	0.0373172	0.842838	-0.0545788	0.021	0.019	1
B3gat3	0.368094	0.28851	0.303732	0	0.295291	0.291282	0.354537	0.0863545	0.159	0.129	1
B3glct	0.210767	0.230757	0.30841	0	0.182374	0.149248	0.0324659	0.743674	0.122	0.074	1
B3gnt2	0.579682	0.662493	0.650169	0.962458	0.608486	0.622454	0.0626473	0.0815561	0.307	0.235	1
B3gnt3	0.108789	0.0450099	0.102559	0	0.0893991	0.11153	0.881825	-0.273006	0.045	0.042	1
B3gnt5	0	0.0150334	0.0211355	0	0	0	0.0672115	2.48017	0.011	0	1
B3gnt8	0.0325435	0.108172	0.189711	0	0.099575	0.0872341	0.0381879	0.570112	0.062	0.029	1
B3gnt9	0.0278672	0.0099053	0.0068825	0	0.0155277	0.00990107	0.62448	-0.250021	0.006	0.01	1
B3gntl1	0.0546694	0.0267948	0.0610017	0	0.0660574	0	0.218683	0.424839	0.026	0.013	1
B430305J03Rik	0.0724964	0.00517953	0.00798641	0	0	0	0.0448077	2.62551	0.013	0	1
B430306N03Rik	0.0442122	0	0.0708978	0	0.0166614	0.0506181	0.210099	0.299952	0.021	0.01	1
B4galnt1	0	0.0817305	0.118263	0	0.0451035	0.0281115	0.0072155	1.20182	0.049	0.013	1
B4galt1	1.13949	0.995612	0.991316	0	0.846895	1.03826	0.034804	0.173752	0.487	0.386	1
B4galt3	0.273443	0.230925	0.356529	0.962458	0.41544	0.342425	0.328959	-0.412212	0.116	0.135	1
B4galt5	0.638951	0.556444	0.484059	0	0.742527	0.413042	0.656837	-0.200352	0.262	0.232	1
B4galt6	0.776547	1.02384	0.977779	0	1.10713	1.05663	0.309318	-0.261116	0.479	0.476	1
B4galt7	0.155997	0.104884	0.106293	0	0.167091	0.146703	0.616089	-0.494997	0.047	0.055	1
B4gat1	0.142449	0.17195	0.276555	0	0.181976	0.153304	0.170481	0.420253	0.086	0.058	1
B930036N10Rik	0.340436	0.183518	0.154589	0.962458	0.272826	0.13313	0.470606	-0.121836	0.094	0.077	1
B930059L03Rik	0.0351451	0.0125213	0.0683114	0	0.0431727	0.131595	0.683631	-0.996881	0.021	0.026	1
B9d2	0.101816	0.14907	0.0839619	0	0.154621	0.280417	0.370854	-1.05077	0.06	0.074	1
Babam1	0.358657	0.299742	0.329463	0.962458	0.189271	0.29206	0.0227484	0.462254	0.18	0.113	1
Babam2	0.662839	0.607085	0.864833	0.962458	0.436309	0.547766	0.000287971	0.802503	0.354	0.222	1
Bace1	0	0.0256475	0.00598865	0	0.0682322	0.00952887	0.19159	-1.63846	0.009	0.019	1
Bach1	1.07324	1.11706	0.832819	2.20724	0.914561	0.796563	0.019765	0.265027	0.468	0.36	1
Bach2	0.18741	0.433325	0.648686	0.962458	0.286171	0.363631	0.000722868	0.786274	0.238	0.135	1
Bach2os	0.124613	0.108554	0.222226	0	0.0392666	0.0370529	0.000917838	2.14302	0.073	0.019	1
Bad	0.308966	0.218283	0.396416	0	0.403421	0.358075	0.488182	-0.28081	0.178	0.148	1
Bag1	0.941756	0.881941	0.843678	0.962458	0.956526	0.831446	0.620873	-0.0621641	0.457	0.392	1
Bag2	0	0	0.00365735	0	0.0152704	0.0426175	0.0672115	-3.02533	0.002	0.013	1
Bag3	0.612872	0.289991	0.258677	0	0.697261	0.607969	0.000566953	-1.21312	0.155	0.238	1
Bag4	0.254362	0.0498148	0.149459	0	0.0615035	0.189402	0.625524	0.0901732	0.054	0.045	1
Bag5	0.126042	0.156888	0.166086	0	0.185436	0.19619	0.586301	-0.308291	0.084	0.071	1
Bag6	0.272933	0.437994	0.470529	0.962458	0.329505	0.457512	0.0674345	0.1417	0.208	0.148	1
Bahcc1	0.0918218	0.0595921	0.0805004	0	0.0261547	0.0797168	0.269015	0.49393	0.041	0.026	1
Bahd1	0.173635	0.126881	0.140572	0	0.158186	0.288223	0.677754	-0.715757	0.077	0.084	1
Baiap2	0.157723	0.174255	0.0579036	0	0.136083	0.219619	0.835609	-0.652065	0.06	0.055	1
Bak1	0.256293	0.207353	0.410576	0	0.204556	0.227155	0.0657702	0.639834	0.139	0.093	1
Bambi	0.0690826	0.134377	0.0491512	0	0	0.0259694	0.0197877	2.47732	0.036	0.01	1
Banf1	0.406445	0.575026	0.436891	0.962458	0.505057	0.515467	0.492564	-0.109003	0.234	0.199	1
Bank1	1.07181	0.945642	0.787638	0	1.05388	1.23546	0.000498747	-0.565846	0.384	0.482	1
Banp	0.316754	0.151426	0.33035	0.962458	0.170384	0.332034	0.141344	0.0809183	0.116	0.08	1
Bap1	0.0829253	0.141764	0.145021	0	0.141433	0.273271	0.546392	-0.675586	0.071	0.08	1
Barx2	0	0.218957	0.0896299	0	0.194994	0.258225	0.173814	-0.936063	0.052	0.074	1
Basp1	0.710314	0.648542	0.786333	0	0.695342	0.508831	0.00101019	0.353537	0.324	0.203	1
Batf	0.724055	0.437908	0.446546	0	0.597136	0.542243	0.66139	-0.268689	0.245	0.215	1
Batf2	0.242693	0.113669	0.132501	0	0.161776	0.203744	0.841027	-0.362971	0.067	0.061	1
Batf3	0.104891	0.230657	0.188533	0	0.327699	0.268623	0.0584385	-0.726034	0.084	0.122	1
Bax	0.765535	0.750478	0.673993	0	0.911663	0.561808	0.599953	-0.111107	0.363	0.315	1
Baz1a	0.931986	0.782685	0.82736	0	0.796691	0.671242	0.154542	0.246306	0.382	0.315	1
Baz1b	0.349351	0.500808	0.462663	0.962458	0.421703	0.362066	0.29916	0.259498	0.206	0.17	1
Baz2a	0.239227	0.462802	0.390255	0.962458	0.340844	0.281083	0.0195669	0.376804	0.2	0.129	1
Baz2b	1.11662	1.02726	1.05305	1.76719	0.898664	0.920784	0.00153884	0.323211	0.519	0.367	1
Bbc3	0.075429	0.184918	0.137503	0	0.187005	0.261461	0.26055	-0.679322	0.067	0.087	1
Bbip1	0.382745	0.557721	0.540737	0.962458	0.563544	0.554257	0.695424	-0.130262	0.238	0.212	1
Bbof1	0	0.0358039	0.100062	0	0	0	0.030099	4.37271	0.015	0	1
Bbs1	0.0165498	0.0462957	0.0292012	0	0.020219	0	0.0761527	1.38862	0.017	0.003	1
Bbs2	0.0183151	0.0124401	0.0499142	0	0.012765	0.117831	0.183435	-1.01902	0.013	0.026	1
Bbs4	0.0200249	0.0399537	0.0336465	0	0.0129663	0.0162473	0.384077	1.03089	0.013	0.006	1
Bbs5	0.025607	0.0665197	0.09603	0	0.0561452	0.0726474	0.657767	0.205151	0.028	0.023	1
Bbs7	0.0764082	0.128657	0.116392	0	0.0554612	0.115953	0.0871632	0.42642	0.06	0.032	1
Bbs9	0.226819	0.225859	0.22926	0	0.188499	0.258012	0.637015	0.0335575	0.112	0.1	1
BC002059	0.164679	0.126233	0.147493	0	0.098124	0.0580952	0.12945	0.87173	0.06	0.035	1
BC003965	0.123932	0.233648	0.170056	0	0.287375	0.164417	0.34983	-0.337886	0.105	0.08	1
BC004004	0.564748	0.481809	0.401837	0	0.365312	0.294282	0.00394169	0.559343	0.223	0.135	1
BC005537	1.85895	1.93795	1.87308	1.76719	1.86882	1.89311	0.767324	0.0231294	0.815	0.81	1
BC005561	0.158128	0.195092	0.246419	0	0.230928	0.102895	0.0781708	0.355763	0.099	0.061	1
BC005624	0.395396	0.420078	0.262779	0.962458	0.440187	0.575524	0.522015	-0.70652	0.193	0.196	1
BC017158	0.0567463	0.0318678	0.0721121	0	0.0663407	0	0.0824508	0.627671	0.028	0.01	1
BC024978	0.148473	0.099586	0.0962261	0	0.123973	0.0676372	0.682568	0.118266	0.045	0.039	1
BC028528	0.50539	0.365878	0.394153	0	0.215898	0.231136	0.00351661	0.980762	0.17	0.093	1
BC029722	0.216811	0.169028	0.157403	0	0.216158	0.216977	0.980353	-0.371549	0.086	0.084	1
BC031181	0.483587	0.475688	0.511132	0	0.436545	0.485187	0.202769	0.131259	0.24	0.19	1
BC035044	0	0.107215	0.185942	0	0.0954232	0.140219	0.870217	0.158923	0.045	0.042	1
BC037032	0.0384932	0.0182156	0.0413588	0	0.00598704	0.0120986	0.27203	1.54619	0.015	0.006	1
BC037704	0.0791589	0.00810792	0.0114231	0	0.0625163	0.0129117	0.514061	-0.847186	0.011	0.016	1
BC049352	0.216881	0.14013	0.164305	0	0.12733	0.203441	0.730986	-0.00728648	0.075	0.068	1
BC049715	0.109456	0.0749702	0.0328427	0	0.025667	0.0435088	0.129483	0.754025	0.034	0.016	1
BC051142	0	0.00653029	0.065525	0	0	0	0.0203323	3.55209	0.017	0	1
BC051226	0.0708505	0.0551609	0.0482099	0	0.0943622	0.0819014	0.902856	-0.718455	0.028	0.029	1
BC052040	0.0602304	0.118161	0.177935	0	0.0678639	0.125716	0.371921	0.544145	0.06	0.045	1
BC106179	0.0211667	0	0.0746126	0	0.0139941	0	0.241359	2.05905	0.011	0.003	1
BC147527	0	0.0099005	0.00663769	0	0.0529894	0	0.360124	-1.81041	0.004	0.01	1
Bcam	0.040974	0.0473615	0.0303038	0	0.0261603	0.0668511	0.298845	-0.296482	0.024	0.013	1
Bcap31	0.643969	0.611801	0.596069	0.962458	0.581636	0.71911	0.426863	-0.132109	0.313	0.264	1
Bcar3	0.179331	0.148101	0.0885492	0	0.103928	0.228814	0.593074	-0.446864	0.056	0.064	1
Bcas2	0.61021	0.595918	0.611549	1.44368	0.548667	0.608402	0.131546	0.0734236	0.313	0.241	1
Bcas3os1	0.0378775	0.0236922	0.0337731	0	0	0	0.030099	3.3829	0.015	0	1
Bcat2	0.158438	0.221302	0.20692	0	0.192479	0.110995	0.0811001	0.438181	0.105	0.068	1
Bccip	0.34798	0.207519	0.356743	0	0.294318	0.389688	0.59531	-0.186233	0.142	0.122	1
Bcdin3d	0.0195413	0.0467961	0.0415976	0	0.0311086	0.0340626	0.214404	0.245992	0.021	0.01	1
Bckdha	0.186715	0.139462	0.210691	0	0.218242	0.291347	0.51605	-0.528277	0.092	0.103	1
Bckdhb	0.130166	0.150806	0.152842	0	0.11455	0.186878	0.603107	-0.0216358	0.064	0.055	1
Bckdk	0.417712	0.273028	0.300577	0	0.355156	0.248357	0.124571	0.0319945	0.137	0.096	1
Bcl10	0.905805	0.921115	0.860045	2.01123	1.04761	0.938613	0.637413	-0.267101	0.442	0.412	1
Bcl2	0.49546	0.293144	0.531986	0	0.420578	0.339012	0.306681	0.283588	0.191	0.161	1
Bcl2a1a	0.0132571	0.0094798	0.034089	0	0.0130255	0	0.530062	1.30656	0.011	0.006	1
Bcl2a1d	0.0801566	0.093992	0.0791452	0	0.034985	0.0825807	0.403986	0.518857	0.036	0.026	1
Bcl2l1	0.954887	0.70973	0.754738	0	0.731203	0.595014	0.00165784	0.302498	0.363	0.238	1
Bcl2l11	0.416371	0.455502	0.59535	0	0.308189	0.418178	0.000358427	0.642519	0.242	0.129	1
Bcl2l12	0.0372104	0.139473	0.122102	0	0.116526	0.0993064	0.0705045	0.085865	0.067	0.035	1
Bcl2l13	0.145692	0.1375	0.184334	0	0.193902	0.0979456	0.0582505	0.128269	0.086	0.048	1
Bcl2l2	0.202472	0.213644	0.192911	0	0.252117	0.247936	0.945884	-0.344152	0.101	0.1	1
Bcl3	0.417634	0.556358	0.467003	0	0.524598	0.46218	0.329371	-0.00938243	0.23	0.19	1
Bcl6	1.17028	1.09025	1.08081	1.44368	0.905161	1.15884	0.344147	0.133682	0.485	0.428	1
Bcl6b	0.0957027	0.0112721	0	0	0.0489424	0.0223576	0.194396	-0.855933	0.006	0.016	1
Bcl7a	0.0529948	0.0322906	0.0550641	0	0.0532297	0.104333	0.769338	-0.752548	0.026	0.029	1
Bcl7b	0.545493	0.439946	0.548304	0.962458	0.516229	0.4854	0.260905	0.0263788	0.242	0.196	1
Bcl7c	0.293527	0.488581	0.492692	0.962458	0.511235	0.502591	0.468006	-0.177354	0.242	0.209	1
Bcl9	0.178354	0.19949	0.325638	0	0.326643	0.336498	0.615417	-0.398797	0.118	0.103	1
Bcl9l	0.129873	0.236126	0.217048	0	0.280169	0.147831	0.118185	-0.0595382	0.094	0.061	1
Bclaf1	0.969343	0.773558	0.838609	0.962458	0.645735	0.687267	0.00937894	0.466877	0.403	0.296	1
Bclaf3	0.178517	0.234775	0.114939	0	0.092045	0.0743986	0.00465098	1.04309	0.088	0.035	1
Bco2	0.11736	0.0266243	0.0480393	0	0.194277	0.213962	0.0171893	-2.0412	0.03	0.064	1
Bcor	0.6177	0.484253	0.517161	0	0.43999	0.592882	0.360944	0.0226753	0.275	0.228	1
Bcorl1	0.253132	0.0660729	0.102346	0	0.0958362	0.0128297	0.132415	1.02759	0.047	0.026	1
Bcr	0.107215	0.101784	0.0313777	0	0.0944887	0.0098064	0.791817	0.313502	0.032	0.029	1
Bcs1l	0.0200249	0.086767	0.0778828	0	0.0579553	0	0.0878026	1.18053	0.032	0.013	1
Bdp1	0.364474	0.307152	0.367947	0	0.444288	0.381854	0.764451	-0.307692	0.17	0.167	1
BE692007	0.0880401	0.0377901	0.0938581	0	0.0229834	0.0706755	0.0545091	0.638102	0.041	0.016	1
Becn1	0.487481	0.522283	0.517969	0.962458	0.601703	0.449331	0.511848	-0.0653159	0.26	0.222	1
Bend3	0.0705549	0.0662104	0.0300266	0	0.0179178	0.035355	0.154532	0.818294	0.024	0.01	1
Bend4	0.0538523	0.0955776	0.137553	0	0.206473	0.151706	0.37638	-0.756903	0.047	0.061	1
Bend6	0.362899	0.282878	0.14893	0	0.365761	0.17104	0.787287	-0.274363	0.109	0.113	1
Bet1	0.572287	0.424444	0.408813	0.962458	0.412648	0.336627	0.00321886	0.26515	0.215	0.125	1
Bet1l	0.211906	0.229858	0.13857	0	0.164021	0.164802	0.192239	0.163315	0.092	0.064	1
Bex3	0.354948	0.476159	0.370617	0	0.314689	0.531003	0.727334	-0.0775486	0.185	0.167	1
Bfar	0.326221	0.312127	0.284174	0	0.259042	0.286966	0.368206	0.16153	0.146	0.119	1
Bgn	0.425032	0.360765	0.358272	0	0.541892	0.362725	0.328116	-0.37659	0.116	0.09	1
Bhlhb9	0.0211667	0.00881635	0.0211589	0	0.0353892	0.0162236	0.56488	-0.630114	0.009	0.013	1
Bhlhe40	0	0.0318612	0.0224371	0	0.147744	0.0397928	0.63215	-2.08842	0.015	0.019	1
Bhlhe41	0.0906835	0.208256	0.2329	0	0.1688	0.240367	0.401162	-0.0113254	0.101	0.08	1
Bicc1	0.149259	0.0359255	0.0826014	0	0.0246091	0.0130738	0.207441	1.88772	0.021	0.01	1
Bicd1	0	0.0324189	0.0492535	0	0.0555918	0	0.535299	0.238153	0.011	0.006	1
Bicd2	0.234087	0.240667	0.30826	0	0.268178	0.354346	0.306761	-0.211235	0.144	0.113	1
Bicra	0.278433	0.318107	0.158486	0	0.271303	0.324375	0.477804	-0.375551	0.127	0.103	1
Bicral	0.597527	0.724763	0.666481	0.962458	0.597167	0.632353	0.183332	0.183206	0.313	0.257	1
Bid	0.198012	0.255501	0.316514	0	0.197277	0.21363	0.02195	0.482391	0.129	0.074	1
Bik	0.108009	0.065369	0.0723949	0	0.104069	0.0525347	0.817083	-0.0845177	0.032	0.029	1
Bin1	1.11748	1.09978	1.14711	0.962458	1.15391	1.23359	0.907499	-0.140372	0.571	0.518	1
Bin2	0.135003	0.15696	0.19606	1.44368	0.166261	0.126005	0.128165	0.155683	0.09	0.058	1
Bin3	0.231745	0.373975	0.305599	0	0.338198	0.326718	0.158898	-0.06998	0.17	0.125	1
Birc2	0.257302	0.3917	0.463436	0.962458	0.344145	0.306687	0.12068	0.36558	0.172	0.129	1
Birc3	1.28744	1.25425	0.951304	1.44368	1.26746	1.19475	0.499967	-0.231405	0.521	0.502	1
Bivm	0.0555711	0.0178622	0.0503468	0	0.048148	0.0412775	0.297574	-0.189404	0.024	0.013	1
Blcap	0.290726	0.24815	0.169449	0	0.189384	0.0951147	0.014892	0.627174	0.105	0.055	1
Blm	0.0132571	0.0227905	0.069674	0	0.0486331	0.0608684	0.984711	-0.307075	0.019	0.019	1
Blmh	0.237449	0.303502	0.283701	0	0.261393	0.390129	0.326046	-0.230331	0.139	0.109	1
Blnk	0.921821	0.930251	0.760636	1.76719	0.887506	0.894297	0.594976	-0.115571	0.427	0.376	1
Bloc1s1	0.480825	0.347966	0.230338	0	0.21947	0.324433	0.0135949	0.247149	0.182	0.106	1
Bloc1s2	0.153604	0.158585	0.169492	0	0.147455	0.160937	0.337599	0.0845919	0.084	0.064	1
Bloc1s3	0.0276716	0.0194951	0.0554221	0	0.0683695	0.0394571	0.504389	-0.508649	0.021	0.029	1
Bloc1s4	0.110745	0.246643	0.191855	0	0.214874	0.347438	0.843196	-0.554968	0.105	0.096	1
Bloc1s5	0.125873	0.0975922	0.139238	0	0.0529434	0.0974212	0.330814	0.72062	0.049	0.035	1
Bloc1s6	0.055968	0.138428	0.127101	0	0.0893293	0.170658	0.626977	-0.119576	0.064	0.055	1
Blvra	0.721045	0.581984	0.59389	1.44368	0.556973	0.514447	0.0213234	0.227263	0.328	0.235	1
Blvrb	1.46022	1.39248	1.46294	0.962458	1.61887	1.56382	0.0813601	-0.282708	0.663	0.63	1
Blzf1	0.137068	0.150323	0.0678062	0	0.0560497	0.093626	0.298364	0.54076	0.047	0.032	1
Bmf	0.0737867	0.183245	0.132141	0	0.0816226	0.0733431	0.00942161	0.880781	0.069	0.026	1
Bmi1	0.340941	0.296928	0.184178	0	0.317398	0.241826	0.647138	-0.189916	0.127	0.109	1
Bmp1	0	0.0384385	0.0229123	0	0.0164944	0.0183542	0.0994992	0.395807	0.021	0.006	1
Bmp2	0.644575	0.465843	0.488671	0	0.721335	0.658996	0.400452	-0.58841	0.174	0.186	1
Bmp2k	1.33346	1.15506	1.19471	1.76719	1.03952	1.21884	0.0393184	0.148873	0.603	0.508	1
Bmpr1a	0.378992	0.364436	0.238505	0	0.354371	0.31493	0.852833	-0.148027	0.137	0.129	1
Bmpr1b	0	0.0142853	0.0374795	0	0.0894052	0.0241379	0.108574	-1.28245	0.009	0.023	1
Bmpr2	1.08896	0.684529	0.709486	0	0.809679	0.765018	0.36397	-0.0396397	0.382	0.325	1
Bms1	0.264993	0.341166	0.236324	1.44368	0.273009	0.219195	0.0868301	0.141506	0.129	0.087	1
Bmt2	0.360939	0.287727	0.508312	0	0.430141	0.316469	0.897309	0.160538	0.172	0.164	1
Bmyc	0.265386	0.476549	0.461532	0.962458	0.641468	0.356476	0.560144	-0.295381	0.23	0.196	1
Bnc2	0	0.0160871	0.0258301	0	0.085904	0.0191064	0.612348	-1.50454	0.006	0.01	1
Bnip1	0	0.0414611	0.0644868	0	0.0457619	0.0362938	0.836618	0.13872	0.021	0.019	1
Bnip2	1.32734	0.959919	1.07197	1.44368	0.874662	0.971959	0.00634683	0.35425	0.534	0.412	1
Bnip3	0.277851	0.255222	0.256752	0	0.141427	0.255287	0.0383908	0.429758	0.127	0.077	1
Bnip3l	0.87538	0.891945	0.848967	0	0.744957	0.965138	0.142768	0.0305027	0.461	0.376	1
Boc	0	0.00609435	0.0301495	0	0.0301089	0.0556398	0.35242	-1.26788	0.006	0.013	1
Bod1	0.0670348	0.0831517	0.119502	0	0.10696	0.111898	0.975377	-0.161462	0.045	0.045	1
Bod1l	0.709656	0.450886	0.496065	0	0.402349	0.325941	0.0011944	0.617658	0.251	0.148	1
Bola1	0.140075	0.21415	0.258717	0	0.234556	0.243283	0.525872	-0.0953797	0.109	0.093	1
Bola2	0.704872	1.01983	0.826628	0.962458	0.903405	0.940872	0.875354	-0.0989912	0.464	0.424	1
Bola3	0.249127	0.120068	0.283233	0	0.353361	0.321821	0.270414	-0.678894	0.109	0.132	1
Bop1	0.275265	0.181	0.218817	0	0.151038	0.174724	0.0466901	0.434044	0.105	0.061	1
Bora	0.0481432	0	0.0133196	0	0	0.0267468	0.536612	0.0243599	0.011	0.006	1
Borcs5	0.162561	0.0774943	0.154748	0.962458	0.0480925	0.0442183	0.00427558	1.33926	0.069	0.023	1
Borcs6	0.533091	0.449734	0.550551	0	0.400993	0.548774	0.108328	0.143532	0.236	0.174	1
Borcs7	0.141534	0.227065	0.321208	0	0.225684	0.105497	0.0768304	0.68857	0.118	0.077	1
Borcs8	0.0410197	0.126924	0.168562	0	0.12063	0.114635	0.310898	0.19607	0.067	0.048	1
Bpgm	0	0.0383274	0.046694	0	0.0574152	0.0401787	0.854267	-0.441978	0.021	0.019	1
Bphl	0.123784	0.115287	0.126535	0	0.0999712	0.208179	0.554743	-0.354801	0.058	0.068	1
Bpnt1	0.107302	0.253388	0.162648	0	0.150414	0.182734	0.106292	0.180017	0.079	0.048	1
Bptf	0.733996	0.652258	0.699724	0	0.753459	0.696001	0.716057	-0.102094	0.363	0.325	1
Braf	0.524439	0.490458	0.52369	0	0.38649	0.589668	0.0199213	0.0837493	0.266	0.177	1
Brap	0.293907	0.256571	0.26006	0	0.164837	0.256841	0.135654	0.364465	0.127	0.09	1
Brat1	0.0355368	0.116809	0.0866088	0	0.0434333	0.0300395	0.0705447	1.23115	0.039	0.016	1
Brca2	0.0132571	0.0551666	0.0383944	0	0.0353432	0.1674	0.583554	-1.33872	0.017	0.023	1
Brcc3	0.190246	0.174954	0.143249	0.962458	0.0870062	0.138535	0.00810649	0.488598	0.094	0.042	1
Brd1	0.417408	0.466484	0.629331	0	0.35256	0.48521	0.000848669	0.470164	0.303	0.18	1
Brd2	1.11901	1.27556	1.37589	0.962458	1.13096	1.18223	0.00303625	0.301941	0.594	0.476	1
Brd3	0.354362	0.333294	0.284612	0	0.309481	0.313897	0.320916	0.00845201	0.146	0.116	1
Brd4	0.778546	0.954768	0.923109	0.962458	0.72586	0.89721	0.00392168	0.248069	0.489	0.347	1
Brd7	0.431682	0.524345	0.617965	0.962458	0.52471	0.450029	0.104235	0.232957	0.27	0.206	1
Brd8	0.337379	0.17178	0.266627	0.962458	0.227761	0.252661	0.23743	0.015065	0.112	0.084	1
Brd9	0.337376	0.366541	0.308777	1.44368	0.438753	0.294162	0.920589	-0.21308	0.161	0.151	1
Brdt	0.0346706	0.0560069	0.120138	0	0.0529522	0	0.0108933	1.53879	0.041	0.01	1
Brf1	0.178644	0.174566	0.161567	0	0.173224	0.100557	0.083103	0.296303	0.082	0.048	1
Brf2	0	0.035226	0.0172454	0	0	0.0128223	0.163811	1.29951	0.013	0.003	1
Bri3	1.74619	1.83129	1.56266	1.44368	1.72105	1.62509	0.534845	0.0322127	0.783	0.707	1
Bri3bp	0.0360893	0.061292	0.0491856	0	0.0127002	0.0902388	0.464403	-0.0123724	0.028	0.019	1
Brip1	0	0.0305191	0.0241441	0	0.00854852	0.00990107	0.532677	1.00764	0.011	0.006	1
Brip1os	0.518091	0.260352	0.445103	0	0.219224	0.266798	0.00552047	0.822407	0.18	0.106	1
Brix1	0.250215	0.163055	0.240649	0	0.276329	0.0959969	0.00958002	0.172535	0.116	0.058	1
Brk1	1.3351	1.27491	1.22457	1.76719	1.24984	1.21285	0.551506	0.0522426	0.637	0.572	1
Brms1	0.0564802	0.178137	0.271052	0	0.260331	0.254839	0.779065	-0.348825	0.101	0.103	1
Brms1l	0.0626344	0.122567	0.174448	0	0.124436	0.0942837	0.281293	0.349157	0.06	0.042	1
Brox	0.447618	0.348326	0.379247	0	0.404654	0.327397	0.0828248	0.0555601	0.189	0.135	1
Brpf1	0.231173	0.258377	0.276458	0	0.131272	0.197984	0.0207735	0.743766	0.112	0.061	1
Brpf3	0.0951439	0.128114	0.0976812	0	0.163192	0.112859	0.717774	-0.387412	0.056	0.061	1
Brwd1	0.286978	0.315507	0.330491	0	0.311138	0.178112	0.172903	0.404082	0.15	0.113	1
Brwd3	0.146102	0.180678	0.186054	0	0.201773	0.152383	0.151305	-0.00544396	0.097	0.064	1
Bscl2	0.544755	0.415773	0.241529	0	0.48286	0.429385	0.833174	-0.428965	0.191	0.183	1
Bsdc1	0.337294	0.311556	0.323041	0	0.31001	0.414091	0.343753	-0.199507	0.15	0.119	1
Bsg	1.17343	1.18373	1.25489	1.76719	1.15747	1.23813	0.469701	0.0362881	0.624	0.55	1
Bst1	0.412861	0.483272	0.372793	0	0.598501	0.352863	0.445627	-0.266807	0.18	0.154	1
Btaf1	0.839705	0.843651	0.89091	0.962458	0.700653	0.696536	0.00261962	0.442297	0.438	0.312	1
Btbd1	0.387094	0.407621	0.367713	0	0.424062	0.420102	0.308575	-0.159484	0.204	0.164	1
Btbd10	0.195975	0.277006	0.313297	0	0.209065	0.286424	0.201954	0.218159	0.129	0.096	1
Btbd11	0.189142	0.105853	0.128638	0	0	0.0411496	9.43603e-05	2.59383	0.056	0.003	1
Btbd19	0.0396621	0.0355191	0.0416265	0	0.0473457	0.028768	0.602489	-0.00445173	0.021	0.016	1
Btbd2	0.123379	0.0852348	0.0601701	0	0.085079	0.170905	0.787801	-0.714299	0.047	0.042	1
Btbd3	0.0953296	0.242663	0.0939228	0	0.120139	0.188068	0.421061	-0.0540428	0.067	0.051	1
Btbd7	0.569296	0.496131	0.53974	0	0.462339	0.564129	0.12966	0.0612467	0.273	0.209	1
Btbd8	0.0313407	0.0345296	0.0710768	0	0.0504485	0.0568673	0.991263	-0.0600847	0.019	0.019	1
Btbd9	0.978366	0.862849	0.888526	0.962458	0.76048	0.721267	0.0188468	0.391247	0.423	0.331	1
Btd	0.0987224	0.0234333	0.0366125	0	0.040919	0.0528613	0.848029	-0.169598	0.021	0.019	1
Btf3	1.23121	1.52989	1.61319	1.76719	1.62765	1.61558	0.0661198	-0.165328	0.727	0.723	1
Btf3l4	0.124168	0.140944	0.186098	0.962458	0.0724594	0.0356768	0.00264951	1.4509	0.077	0.026	1
Btg1	1.45363	1.95603	2.03267	0	1.83205	1.85632	0.0108917	0.154442	0.813	0.682	1
Btg2	2.10096	2.67036	2.44646	1.76719	2.44008	2.69245	0.298794	-0.127672	0.882	0.871	1
Btg3	0.313525	0.407135	0.364923	0	0.224454	0.31619	0.00857893	0.537159	0.185	0.109	1
Btk	0.542635	0.555522	0.469918	0	0.515164	0.340098	0.0160534	0.299657	0.262	0.174	1
Btnl2	0.0627672	0.0276366	0.0181952	0	0.0550314	0.0880774	0.235931	-1.29556	0.019	0.032	1
Btrc	0.272182	0.202377	0.271071	0	0.156654	0.185667	0.0101716	0.584928	0.124	0.064	1
Bub1b	0.0132571	0.0285208	0.0951742	0	0.0135013	0.0341225	0.287532	1.23539	0.024	0.013	1
Bub3	0.395196	0.535688	0.360648	0	0.353876	0.396877	0.0414548	0.24298	0.21	0.141	1
Bud13	0.0857946	0.100418	0.120733	0	0.0798149	0.0676399	0.428762	0.545959	0.047	0.035	1
Bud23	0.173213	0.0969037	0.124373	0	0.127387	0.0595618	0.246158	0.371246	0.058	0.039	1
Bud31	0.538783	0.366251	0.44145	0	0.533659	0.473084	0.704124	-0.276766	0.219	0.196	1
Bvht	0	0	0	0	0.0610824	0	0.0142224	-4.05302	0	0.013	1
Bysl	0.0590554	0.0611104	0.0777032	0	0.144623	0.0869352	0.457415	-0.788778	0.032	0.042	1
Bzw1	1.23038	1.06932	1.0512	0.962458	1.02954	1.08081	0.411027	0.0729935	0.511	0.453	1
Bzw2	0.0613227	0.111926	0.188588	0	0.112167	0.128523	0.503002	0.254591	0.06	0.048	1
C030005K06Rik	0.021483	0.0294883	0	0	0.0471625	0.0104933	0.337831	-1.04523	0.009	0.016	1
C030006K11Rik	0.0800281	0.0491808	0.0346349	0	0.00778311	0.0384724	0.209033	0.944399	0.021	0.01	1
C030034I22Rik	0.0132571	0.0499303	0.058447	0	0.0612658	0	0.0436396	0.534844	0.032	0.01	1
C030034L19Rik	0.20648	0.0843407	0.289634	0	0.124709	0.123018	0.0368336	0.79959	0.092	0.051	1
C030037D09Rik	0.0362492	0.0149466	0.0071239	0	0.0470154	0	0.874084	-0.736977	0.009	0.01	1
C130013H08Rik	0.0370151	0.0160829	0.0196447	0	0.0189271	0.019834	0.541881	0.0528285	0.011	0.006	1
C130026I21Rik	0.0835516	0.135551	0.185732	1.44368	0.121126	0.0769905	0.175772	0.495855	0.073	0.048	1
C130036L24Rik	0.121997	0.0100861	0	0	0.0251908	0.0442311	0.10273	-0.536927	0.006	0.019	1
C130046K22Rik	0.0224353	0.00921772	0.0379773	0	0.0314874	0.0221334	0.995334	-0.121317	0.013	0.013	1
C130050O18Rik	0.0399573	0.0427995	0.030318	0	0.0406366	0	0.139437	0.669173	0.019	0.006	1
C1d	0.361235	0.341116	0.465956	0	0.358855	0.53227	0.681395	-0.159811	0.204	0.183	1
C1galt1	0.48032	0.532549	0.416848	0	0.549428	0.479807	0.363203	-0.173571	0.232	0.193	1
C1galt1c1	0.112163	0.141154	0.203999	0	0.256432	0.21169	0.574456	-0.529225	0.082	0.068	1
C1qa	3.70113	3.69027	3.83023	3.22969	3.72105	3.69576	0.142801	0.0818929	0.996	0.997	1
C1qb	3.18042	3.31539	3.40919	3.35019	3.34715	3.27397	0.726055	0.0459417	0.979	0.961	1
C1qbp	0.61075	0.397971	0.383698	0	0.46616	0.357774	0.0596121	0.0560034	0.221	0.154	1
C1qc	3.34934	3.31566	3.43681	3.4054	3.34318	3.31185	0.268474	0.0802648	0.989	0.977	1
C1qtnf1	0.118234	0.144484	0.142745	0.962458	0.133488	0.0625785	0.0841609	0.425856	0.069	0.039	1
C1qtnf12	0.106549	0.101341	0.0639598	0	0.122868	0.188062	0.716167	-0.923612	0.047	0.051	1
C1qtnf6	0	0.00979616	0.0329727	0	0	0	0.0672115	2.77853	0.011	0	1
C1ra	0.0337247	0.102641	0.0220933	0	0.0959921	0.0438232	0.970583	-0.443194	0.036	0.035	1
C1rl	0.0580725	0.0260558	0.0585335	0	0.00778311	0	0.0239306	2.8031	0.024	0.003	1
C1s1	0.0198689	0.0072891	0.0571408	0	0	0.068874	0.112116	-0.0316439	0.015	0.003	1
C2	0.471315	0.106463	0.202922	0	0.197079	0.0926176	0.0401499	0.611248	0.079	0.042	1
C2cd2	0.160154	0.0803536	0.137857	0	0.179514	0.115609	0.597914	-0.312695	0.058	0.048	1
C2cd2l	0.326185	0.21102	0.201057	0	0.0840956	0.179113	0.00593431	0.834904	0.109	0.051	1
C2cd3	0.183598	0.127477	0.211649	0	0.162687	0.109406	0.0663981	0.398439	0.079	0.045	1
C2cd5	0.185177	0.125259	0.194851	0	0.128913	0.262008	0.0620293	-0.225616	0.09	0.051	1
C3	0.56227	0.404357	0.13475	0	0.104004	0.0837096	0.00234985	1.85195	0.056	0.013	1
C330007P06Rik	0.197434	0.39559	0.472995	1.76719	0.47246	0.496659	0.812315	-0.344838	0.195	0.177	1
C330011M18Rik	0.0793573	0.0142853	0.0522475	0	0.0244735	0.0118345	0.381002	1.104	0.017	0.01	1
C330018D20Rik	0.0355302	0.0564433	0.0657732	0	0	0.145146	0.443785	-0.350605	0.032	0.023	1
C3ar1	1.99019	1.94021	1.85912	2.20724	1.89915	1.93034	0.947774	-0.010162	0.807	0.794	1
C430049B03Rik	0.054248	0.0226068	0.036087	0	0.0520007	0.00901354	0.515139	0.0804852	0.015	0.01	1
C4b	1.78973	1.80071	1.76872	2.20724	1.53424	1.75066	0.00360651	0.239038	0.687	0.54	1
C530008M17Rik	0	0	0.0172276	0	0.0254003	0.0345622	0.0679186	-1.64474	0.002	0.013	1
C5ar1	2.18543	1.97122	2.04511	1.76719	2.18454	2.26109	0.00998608	-0.2899	0.858	0.849	1
C5ar2	0.25466	0.17841	0.2789	0.962458	0.253125	0.407962	0.879377	-0.541155	0.116	0.116	1
C730034F03Rik	0.0150965	0.045761	0.0648644	0	0.0130312	0.0615951	0.291897	0.407845	0.024	0.013	1
C79798	0	0	0.00594463	0	0.015535	0.0516378	0.151841	-2.85914	0.002	0.01	1
C87436	0.164724	0.214273	0.250521	0.962458	0.255953	0.161815	0.151454	0.0630852	0.116	0.08	1
C920021L13Rik	0.203302	0.0549108	0.0953616	0	0.0189271	0.120697	0.132509	0.512323	0.043	0.023	1
C9orf72	0.266291	0.378671	0.454242	0	0.307555	0.443481	0.216372	0.110727	0.2	0.154	1
CAAA01118383.1	0.47413	0.535382	0.487944	0	0.479615	0.562343	0.839448	-0.061735	0.217	0.199	1
CAAA01147332.1	0.0372093	0.0446021	0.0608772	0	0.0338536	0.0216224	0.121912	0.804437	0.03	0.013	1
Caap1	0.165495	0.102679	0.199479	0	0.0833352	0.131253	0.0336904	0.61525	0.082	0.042	1
Cab39	1.074	0.757825	0.889626	0	0.88446	0.870917	0.175014	0.00500041	0.464	0.376	1
Cab39l	0.657999	0.523285	0.500242	0.962458	0.437957	0.47094	0.19344	0.287566	0.255	0.212	1
Cabin1	0.235324	0.339034	0.314825	0	0.302694	0.273098	0.351047	0.1261	0.152	0.122	1
Cables1	0.285924	0.319808	0.296448	1.44368	0.282663	0.313963	0.479549	-0.0139953	0.137	0.116	1
Cables2	0.0150965	0.0797758	0.0947278	0	0.118282	0.0512537	0.407465	-0.176712	0.045	0.032	1
Cabyr	0.13686	0.0829828	0.0708066	0	0.0399746	0.0198695	0.00563142	1.43753	0.045	0.01	1
Cacfd1	0.0550224	0.114848	0.0886521	0	0.10481	0.0490342	0.729775	0.235507	0.047	0.042	1
Cacna1a	0.225712	0.090129	0.155607	0	0.411613	0.226852	0.00642083	-1.29547	0.06	0.113	1
Cacna1c	0	0.0280237	0.0511008	0	0.00703891	0.0396991	0.38535	0.520783	0.017	0.01	1
Cacna1d	0.561847	0.546768	0.612805	1.44368	0.353464	0.435444	4.97219e-05	0.678161	0.277	0.145	1
Cacna1f	0	0.0207832	0.045822	0	0.0914349	0	0.515139	-0.689677	0.011	0.016	1
Cacna2d1	0	0.0350569	0.0254958	0	0.0905385	0	0.812233	-0.927894	0.015	0.013	1
Cacnb1	0.0224353	0.0179921	0.0196809	0	0	0	0.0672115	2.76564	0.011	0	1
Cacnb2	0.095353	0.016957	0.140772	0	0.114093	0.0413282	0.910559	0.197152	0.017	0.016	1
Cactin	0.0157898	0.125966	0.0464795	0	0.0871325	0.15734	0.527953	-0.817978	0.036	0.045	1
Cacul1	0.654423	0.505516	0.531107	0.962458	0.668768	0.569586	0.468199	-0.26345	0.273	0.228	1
Cacybp	0.614765	0.401433	0.314996	0	0.584474	0.525893	0.066708	-0.60029	0.197	0.241	1
Cad	0	0.00736081	0.040633	0	0.0727527	0.0128223	0.320597	-0.942735	0.011	0.019	1
Cadps2	0	0	0	0	0	0.0230421	0.0338884	-2.7522	0	0.01	1
Calcoco1	0.257693	0.25764	0.225509	0	0.156902	0.0441623	0.00015008	1.29574	0.107	0.032	1
Calcrl	0.507373	0.181077	0.348019	0	0.345215	0.256771	0.148511	0.0961313	0.148	0.106	1
Cald1	0.267913	0.155474	0.313282	0	0.474471	0.129618	0.974983	-0.395952	0.082	0.08	1
Calhm2	0.283767	0.272949	0.333806	0.962458	0.130769	0.270942	0.0372115	0.638951	0.127	0.077	1
Calhm6	0.152098	0.0520938	0.0256226	0	0.129359	0.026569	0.23521	-0.547634	0.034	0.019	1
Calm1	2.56785	2.15408	2.12172	2.51178	2.34503	2.13801	0.815938	-0.0541428	0.895	0.875	1
Calm2	1.96479	2.01341	2.2149	2.01123	2.00879	2.03615	0.145459	0.14608	0.888	0.814	1
Calm3	0.864846	0.998794	0.862372	1.44368	1.01546	0.98177	0.326512	-0.207987	0.459	0.457	1
Calml4	0.0946291	0.142558	0.0961289	0	0.211174	0.115974	0.880749	-0.599676	0.062	0.058	1
Calr	1.66718	1.49031	1.75782	2.37106	1.74306	1.75621	0.133485	-0.168066	0.738	0.72	1
Calu	0.547995	0.722953	0.514966	0.962458	0.692623	0.519963	0.556073	-0.0540044	0.292	0.257	1
Camk1	1.07008	0.999874	0.950254	0.962458	0.984438	0.963483	0.429967	0.0295959	0.494	0.441	1
Camk2a	0.250541	0.0339307	0.0736084	0	0.00778311	0	0.0111478	3.7444	0.028	0.003	1
Camk2b	0.0405231	0.00868775	0.0144911	0	0.00871541	0.00716361	0.531369	0.759556	0.011	0.006	1
Camk2g	0.192921	0.18982	0.27138	0	0.166736	0.158652	0.0172812	0.547139	0.118	0.064	1
Camk2n1	0.0406235	0.0442276	0.0315318	0	0.0354867	0.0597953	0.548547	-0.354739	0.019	0.026	1
Camkk2	0.565835	0.471939	0.48294	1.44368	0.553158	0.556673	0.689731	-0.236661	0.262	0.225	1
Camkmt	0.446882	0.266095	0.442962	0	0.236451	0.34563	0.0386099	0.475395	0.172	0.116	1
Caml	0.248892	0.218617	0.297406	0	0.128614	0.275547	0.0109749	0.416211	0.142	0.077	1
Camsap1	0.100625	0.226741	0.120684	0	0.0744267	0.111415	0.126696	0.776813	0.064	0.039	1
Camsap2	0.264926	0.342227	0.28896	0	0.317606	0.310753	0.253165	-0.0539299	0.159	0.122	1
Camta1	0.182238	0.338648	0.314767	0	0.325941	0.295022	0.983368	-0.0410822	0.133	0.129	1
Camta2	0.408901	0.448487	0.463867	0	0.358216	0.473563	0.0714915	0.141782	0.212	0.151	1
Cand1	0.228027	0.34397	0.343675	0	0.308644	0.431973	0.750726	-0.213479	0.146	0.151	1
Cant1	0.205352	0.295938	0.307892	0	0.357275	0.285245	0.50895	-0.190249	0.133	0.113	1
Canx	2.02485	1.65493	1.69085	2.7449	1.95533	1.72532	0.0585217	-0.199095	0.788	0.788	1
Cap1	1.44595	1.17466	1.1612	1.76719	1.11855	1.10799	0.0501867	0.209202	0.59	0.469	1
Cap2	0	0.0152563	0.00365735	0	0.0598158	0.0104933	0.191208	-2.10156	0.006	0.016	1
Capg	0.955709	0.844491	0.767701	0	0.655832	0.82519	0.0117378	0.229504	0.384	0.27	1
Capn1	0.241849	0.244889	0.323854	0	0.280415	0.287919	0.485195	-0.00030803	0.133	0.113	1
Capn10	0.173424	0.0378856	0.0143845	0	0.0248094	0.0506181	0.212244	0.359747	0.021	0.01	1
Capn15	0.111278	0.0620276	0.102915	0	0.160432	0.156682	0.949671	-0.855242	0.058	0.055	1
Capn2	0.499436	0.390778	0.418503	0.962458	0.341817	0.410011	0.132473	0.190035	0.225	0.17	1
Capn7	0.298173	0.109831	0.185921	0	0.249542	0.386345	0.342934	-0.92473	0.09	0.106	1
Capns1	0.964606	0.869266	0.930098	1.44368	0.862139	0.932761	0.120032	0.0367384	0.483	0.383	1
Caprin1	0.97478	1.00533	0.936955	0.962458	1.02812	0.927361	0.668056	-0.0315127	0.479	0.434	1
Caprin2	0.120558	0.0715004	0.0440157	0	0.0345041	0.0644668	0.169015	0.401577	0.032	0.016	1
Capza1	1.00016	0.764731	0.954629	0	1.00129	0.899694	0.925795	-0.123579	0.483	0.434	1
Capza2	1.77156	1.66021	1.62387	1.44368	1.81134	1.75697	0.181294	-0.216443	0.779	0.756	1
Capzb	1.74566	1.43767	1.43976	2.20724	1.5165	1.61749	0.547159	-0.138714	0.753	0.682	1
Car11	0.0505178	0.0112535	0.025238	0	0.0310327	0	0.388167	0.468855	0.013	0.006	1
Car13	0.312364	0.112631	0.0356746	0	0.172635	0.0756541	0.798164	-0.203274	0.045	0.048	1
Car15	0	0.0326881	0	0	0.028634	0.0314613	0.181835	-1.286	0.004	0.013	1
Car5b	0.0215241	0.0277643	0.051292	0	0.00879637	0	0.0747068	2.41227	0.017	0.003	1
Car7	0	0.0234151	0.017311	0	0.0888901	0	0.890921	-1.4246	0.011	0.01	1
Car9	0	0.0173136	0.0406519	0	0.0164944	0.0349197	0.388167	-0.0134453	0.013	0.006	1
Card11	0	0.00517953	0.0371257	0	0.0208254	0	0.243091	0.68336	0.011	0.003	1
Card19	1.10048	0.98134	1.14754	1.76719	1.09967	0.88479	0.0512529	0.176144	0.526	0.421	1
Card6	0.0497213	0.0849431	0.0717582	0	0.0882053	0.121983	0.907885	-0.541205	0.034	0.032	1
Card9	0.123833	0.17224	0.168355	0	0.278431	0.286792	0.998583	-0.876881	0.077	0.074	1
Carf	0.0610411	0.059508	0.0691357	0.962458	0.0244382	0.112477	0.426592	-0.192212	0.036	0.026	1
Carhsp1	0.37275	0.248684	0.227387	0.962458	0.338432	0.306921	0.619949	-0.383532	0.139	0.148	1
Carm1	0.13793	0.224789	0.171817	0.962458	0.182054	0.0939877	0.291361	0.375981	0.092	0.071	1
Carmil1	0.0701434	0.0415156	0.0684777	0	0.0780518	0.0191064	0.283753	0.222647	0.032	0.019	1
Carnmt1	0.187946	0.165188	0.15466	0	0.22185	0.0707816	0.390547	0.113552	0.086	0.068	1
Cars	0.140384	0.103762	0.128422	0	0.0386208	0.105108	0.0838293	0.775268	0.06	0.032	1
Cars2	0.132608	0.0285791	0.108945	0	0.0629504	0.165274	0.362836	-0.432689	0.032	0.045	1
Casc3	0.239285	0.367672	0.423882	0	0.440847	0.296451	0.405288	0.0165274	0.176	0.145	1
Casd1	0.18515	0.300066	0.307446	1.44368	0.242315	0.209565	0.068749	0.321142	0.144	0.096	1
Casp1	0.429187	0.319918	0.341963	0	0.543867	0.356795	0.447676	-0.471852	0.174	0.183	1
Casp12	0.0233341	0.062492	0.0366977	0	0.0703037	0.0122206	0.497513	0.00627954	0.019	0.013	1
Casp2	0.0627197	0.084332	0.176656	0	0.0152099	0.226693	0.375691	0.0459521	0.054	0.039	1
Casp3	0.192494	0.167403	0.24834	0	0.184158	0.313728	0.738601	-0.259175	0.101	0.106	1
Casp4	1.20557	1.47304	1.05507	2.01123	1.64924	1.37329	0.000121653	-0.547015	0.53	0.614	1
Casp6	0.148375	0.194703	0.179144	0	0.190349	0.182757	0.787029	-0.0613841	0.084	0.077	1
Casp7	0.132201	0.16346	0.145086	0	0.123614	0.0807082	0.0349269	0.552313	0.09	0.048	1
Casp8	0.692725	0.525171	0.80679	0	0.696931	0.755205	0.435762	-0.0743594	0.365	0.305	1
Casp8ap2	0.18074	0.133456	0.237121	0.962458	0.138662	0.198278	0.0570771	0.173249	0.103	0.061	1
Casp9	0.123864	0.126892	0.166488	0	0.0967123	0.0938821	0.360462	0.631242	0.049	0.035	1
Cass4	0.396081	0.396509	0.396667	0	0.537835	0.533455	0.87853	-0.537826	0.189	0.18	1
Cast	0.875005	0.823314	0.794214	0	0.899102	0.78235	0.10735	-0.0646191	0.399	0.299	1
Castor1	0.107051	0.054518	0.0742972	0	0.0135013	0.0297597	0.0117498	1.6468	0.034	0.006	1
Castor2	0.169958	0.199202	0.200462	0	0.121498	0.239604	0.517655	0.120748	0.088	0.074	1
Casz1	0	0.0386027	0.00771548	0	0.0357742	0.0467529	0.557336	-1.19159	0.009	0.013	1
Cat	0.824723	0.674233	0.772832	0	0.640261	0.680288	0.044492	0.254797	0.348	0.26	1
Catip	0.0602592	0.0209493	0.0349587	0	0.0679282	0.0333475	0.608223	-0.594987	0.021	0.016	1
Catsper2	0.0688756	0.0552498	0.0248424	0	0	0.056816	0.213863	0.540843	0.021	0.01	1
Catspere2	0.0268425	0.0271962	0.0796383	0	0.0819277	0	0.0491353	0.270115	0.026	0.006	1
Catsperg1	0.0696529	0.0297354	0.0467607	0	0.0404023	0.047895	0.604397	-0.0122482	0.021	0.016	1
Cav1	0.0311356	0.0621601	0.0286065	0	0.0537244	0.0835248	0.586376	-0.747273	0.017	0.023	1
Cav2	0.237325	0.23526	0.238074	0	0.276077	0.252841	0.143928	-0.180813	0.118	0.08	1
Cavin1	0.233178	0.239819	0.100372	0	0.276943	0.281511	0.656627	-0.766831	0.071	0.077	1
Cavin3	0.0132571	0.0670391	0.0451394	0	0.182554	0.115262	0.183011	-1.68954	0.028	0.045	1
Cbarp	0.0819302	0.0456692	0.0309176	0	0	0.0297597	0.0358293	1.41667	0.021	0.003	1
Cbfa2t2	0.250209	0.204089	0.263209	0.962458	0.172874	0.0958705	0.0462729	0.833279	0.099	0.058	1
Cbfa2t3	0.196379	0.341637	0.497394	0	0.352535	0.376565	0.00921642	0.168097	0.191	0.113	1
Cbfb	0.738684	0.622104	0.615266	0.962458	0.506418	0.595064	0.0228778	0.27524	0.322	0.228	1
Cbl	0.938369	0.981956	1.10249	0	0.983511	1.04867	0.123062	0.0510144	0.545	0.444	1
Cblb	0.288032	0.188395	0.253667	0	0.120736	0.175053	0.00320137	0.739012	0.12	0.055	1
Cbll1	0.172771	0.163514	0.163058	0	0.205036	0.062631	0.126717	0.259083	0.077	0.048	1
Cbr1	0.176378	0.116091	0.209039	0	0.178415	0.0994161	0.291203	0.302623	0.086	0.064	1
Cbr3	0.0610407	0.0537782	0.199173	0	0.140095	0.0943657	0.623083	0.123397	0.054	0.045	1
Cbr4	0.0808172	0.023896	0.125964	0	0.024123	0.0212978	0.0106826	1.78164	0.041	0.01	1
Cbwd1	0.0880357	0.0649264	0.0763307	0	0.148791	0.132054	0.773971	-0.957818	0.039	0.042	1
Cbx1	0.540361	0.410996	0.439677	0	0.547878	0.419972	0.095193	-0.157483	0.258	0.186	1
Cbx3	0.718685	0.783315	0.658806	0	0.717718	0.829089	0.282489	-0.160637	0.369	0.305	1
Cbx4	0.487015	0.507346	0.523904	0	0.279449	0.456307	0.0166164	0.58364	0.221	0.148	1
Cbx5	0.194509	0.223857	0.254242	0	0.248575	0.17448	0.252395	0.147752	0.118	0.09	1
Cbx6	0.250539	0.228079	0.230685	0	0.118626	0.161213	0.00663792	0.795389	0.112	0.055	1
Cbx7	0.202677	0.242922	0.178628	0	0.0848179	0.176619	0.0113869	0.697195	0.107	0.055	1
Cbx8	0.0384486	0.0459227	0.0561107	0	0.0583109	0.0218966	0.599631	0.247627	0.021	0.016	1
Cby1	0.0665871	0.0557577	0.0291392	0	0.0450997	0.0496729	0.476775	-0.111913	0.024	0.016	1
Cc2d1a	0.129028	0.140372	0.0967895	0	0.143787	0.0838337	0.445647	0.0197394	0.052	0.039	1
Cc2d1b	0.315154	0.377837	0.360419	0	0.37927	0.479181	0.254193	-0.304535	0.187	0.145	1
Cc2d2a	0.0399352	0.0391134	0.118113	0	0.0189903	0.117567	0.480068	0.200595	0.024	0.016	1
Ccar1	0.572119	0.607302	0.53495	0	0.499849	0.578301	0.0177551	0.0977668	0.294	0.199	1
Ccar2	0.197317	0.186283	0.201671	0	0.126912	0.0457997	0.0022245	1.19313	0.084	0.029	1
Ccdc102a	0.0211667	0.0036283	0.0142484	0	0.0234338	0	0.619919	-0.152627	0.006	0.01	1
Ccdc106	0.0896954	0.176497	0.262266	0	0.363206	0.269045	0.287693	-0.702468	0.092	0.113	1
Ccdc107	0.161696	0.269495	0.374204	0	0.150155	0.232959	0.00789654	0.761426	0.146	0.08	1
Ccdc112	0.177987	0.0683297	0.116012	0	0.0426206	0.155758	0.164845	0.145675	0.054	0.032	1
Ccdc114	0.0477528	0.0789178	0.0251966	0	0.0245471	0.0577434	0.294411	0.196108	0.024	0.013	1
Ccdc115	0.33223	0.368817	0.423036	0	0.321407	0.48001	0.491226	-0.0469802	0.187	0.161	1
Ccdc117	0.173702	0.118671	0.194435	0	0.167712	0.430409	0.0819057	-0.971797	0.079	0.113	1
Ccdc12	0.547791	0.61565	0.482048	2.01123	0.626532	0.625945	0.328786	-0.308789	0.268	0.28	1
Ccdc122	0.268176	0.171709	0.166927	0.962458	0.0870422	0.0602391	0.00434309	1.27304	0.088	0.035	1
Ccdc124	0.391433	0.458105	0.280135	0.962458	0.348748	0.297045	0.166426	0.175481	0.197	0.151	1
Ccdc126	0.118993	0.181454	0.115245	0	0.191552	0.219499	0.678988	-0.600545	0.064	0.071	1
Ccdc127	0.267226	0.168129	0.165349	0	0.189029	0.222613	0.777149	-0.182062	0.088	0.08	1
Ccdc130	0.0636802	0.0418245	0.0107377	0	0.0339892	0.0543448	0.478032	-0.546093	0.013	0.019	1
Ccdc134	0.1192	0.189803	0.235749	0	0.227493	0.368172	0.641933	-0.62816	0.097	0.103	1
Ccdc137	0.131314	0.0523515	0.0436831	0	0	0.032134	0.0481648	1.78083	0.026	0.006	1
Ccdc138	0.0746231	0.0917355	0.0207994	0	0.141901	0.033111	0.988139	-0.745614	0.026	0.026	1
Ccdc14	0.0132571	0.00912042	0.0437703	0	0.0643694	0.027741	0.988668	-0.791539	0.013	0.013	1
Ccdc141	0.048434	0.0412056	0.0526416	0	0.020667	0.118576	0.976755	-0.541664	0.026	0.026	1
Ccdc146	0.0132571	0.0243566	0.0139523	0	0	0.0422113	0.390222	-0.27861	0.013	0.006	1
Ccdc148	0	0.0232556	0.0408378	0	0	0	0.030099	3.26263	0.015	0	1
Ccdc15	0.0789202	0.035435	0.0640647	0	0.0613364	0.0431336	0.443447	0.0811149	0.032	0.023	1
Ccdc152	0.102521	0.31524	0.375653	0	0.245001	0.174468	0.00484228	0.648239	0.15	0.08	1
Ccdc157	0.0151067	0.0207103	0.0120046	0	0	0.0319108	0.243961	-0.081627	0.011	0.003	1
Ccdc163	0.146242	0.118205	0.136245	0	0.270542	0.223235	0.710169	-0.990578	0.062	0.068	1
Ccdc167	0.131276	0.0719521	0.098588	0	0.0875291	0.124869	0.605908	-0.173844	0.047	0.039	1
Ccdc17	0	0.0253243	0.0177883	0	0	0.0420007	0.875655	-0.261848	0.009	0.01	1
Ccdc171	0.0833858	0.119057	0.150439	0	0.143691	0.157474	0.399935	-0.237238	0.064	0.048	1
Ccdc173	0.0770986	0.103337	0.0454393	0	0.0245823	0.113126	0.417479	0.0387763	0.041	0.029	1
Ccdc174	0.264566	0.232787	0.211993	0	0.252376	0.291966	0.600508	-0.285612	0.122	0.106	1
Ccdc18	0.0225251	0.0193171	0.0351512	0	0.0321831	0.0312525	0.687523	-0.228884	0.013	0.01	1
Ccdc180	0.0195413	0.00868775	0.0418396	0	0.00904984	0	0.240495	1.89376	0.011	0.003	1
Ccdc181	0.0400673	0.0920892	0.0147442	0.962458	0.033021	0.103343	0.492014	-0.65457	0.021	0.029	1
Ccdc186	0.315351	0.227452	0.339975	0	0.259361	0.406895	0.23459	-0.187233	0.157	0.119	1
Ccdc189	0.0594463	0	0.0246347	0	0	0	0.0448077	2.90764	0.013	0	1
Ccdc191	0.099322	0.079875	0.0906304	0	0.0190989	0.0992815	0.10306	0.572996	0.045	0.023	1
Ccdc22	0.274724	0.264395	0.2588	0	0.223191	0.177074	0.514887	0.429223	0.105	0.09	1
Ccdc25	0.149649	0.20758	0.201615	0	0.264307	0.200776	0.485	-0.286021	0.077	0.09	1
Ccdc28a	0.0636649	0.0342478	0.0955776	0	0.0455318	0.142343	0.771062	-0.447099	0.036	0.032	1
Ccdc28b	0.0917698	0.219047	0.216444	0	0.111329	0.153933	0.0910344	0.62268	0.088	0.055	1
Ccdc3	0.0167612	0.0121518	0	0	0.0614344	0	0.358889	-1.97551	0.004	0.01	1
Ccdc32	0.251596	0.126817	0.251625	0	0.132424	0.195419	0.339622	0.38631	0.073	0.055	1
Ccdc34	0.227915	0.296098	0.195308	0	0.331468	0.271204	0.849143	-0.401199	0.116	0.116	1
Ccdc43	0.0900841	0.0801876	0.129755	0	0.0742224	0.145207	0.150618	-0.0474433	0.064	0.039	1
Ccdc47	0.688124	0.50522	0.415438	0.962458	0.581328	0.48719	0.523798	-0.15814	0.262	0.225	1
Ccdc50	1.23103	1.13273	1.0882	1.44368	1.00621	0.99475	0.0231672	0.274731	0.575	0.46	1
Ccdc51	0	0.0473371	0.0275738	0	0.0385855	0	0.287408	0.485622	0.019	0.01	1
Ccdc57	0.0474788	0.0732442	0.0316352	0	0.0234057	0.0519853	0.43305	0.344863	0.032	0.023	1
Ccdc58	0.0508638	0.191794	0.193738	0	0.144115	0.0517123	0.112636	0.803167	0.077	0.048	1
Ccdc59	0.41714	0.360814	0.295575	0.962458	0.359009	0.339724	0.318225	-0.0709361	0.182	0.145	1
Ccdc6	0.381489	0.158629	0.36577	0.962458	0.202545	0.283001	0.120515	0.325758	0.135	0.096	1
Ccdc61	0.0309612	0.0142306	0.0985964	0	0.0316296	0.0487908	0.448186	0.523996	0.028	0.019	1
Ccdc62	0.100137	0.0491622	0.110446	0	0.0456792	0.120369	0.941097	0.0777783	0.03	0.029	1
Ccdc63	0.0499234	0.0291347	0.0457038	0	0.0650448	0.0296934	0.646797	-0.263363	0.017	0.013	1
Ccdc66	0.0324718	0.0616944	0.0367664	0	0.0415486	0.0932182	0.847653	-0.586735	0.032	0.029	1
Ccdc69	0.0562314	0.0197134	0.00817785	0	0.0740361	0.0813107	0.192159	-1.90461	0.009	0.019	1
Ccdc71	0.0820392	0.124037	0.114169	0	0.0840523	0.171294	0.303282	-0.190148	0.06	0.042	1
Ccdc71l	0.391627	0.308306	0.343389	0	0.274249	0.170556	0.00286146	0.669334	0.157	0.08	1
Ccdc73	0.193417	0.0697487	0.0254045	0	0.0661221	0.115441	0.379129	-0.397539	0.019	0.029	1
Ccdc77	0.0759981	0.0224379	0.0486675	0	0.0625875	0.10219	0.977704	-0.906403	0.026	0.026	1
Ccdc80	0.0697558	0.0359862	0.0986323	0	0.123522	0	0.698376	0.127009	0.024	0.019	1
Ccdc82	0.496098	0.337779	0.350437	0	0.212766	0.366428	0.0168602	0.413121	0.185	0.113	1
Ccdc84	0.094741	0.056116	0.0303094	0	0.0413526	0.0478709	0.293824	0.131919	0.028	0.016	1
Ccdc85b	0.160339	0.272254	0.307255	0	0.457613	0.348731	0.156416	-0.670798	0.135	0.164	1
Ccdc86	0.085196	0.0975639	0.166682	0	0.17058	0.308255	0.194622	-0.950905	0.067	0.09	1
Ccdc88a	0.738084	0.517963	0.5936	1.44368	0.67698	0.665971	0.779121	-0.255018	0.283	0.273	1
Ccdc88b	0.174536	0.204523	0.268504	0	0.178241	0.205834	0.150339	0.299528	0.109	0.077	1
Ccdc9	0.178616	0.216671	0.352122	0	0.245522	0.240589	0.520639	0.228646	0.109	0.093	1
Ccdc90b	0.196108	0.266817	0.294931	0	0.403311	0.429534	0.477384	-0.729807	0.129	0.138	1
Ccdc91	0.123772	0.0426018	0.112257	0	0.119573	0.0546211	0.71873	0.0155205	0.041	0.035	1
Ccdc93	0.159118	0.270839	0.211685	0	0.188574	0.283058	0.555039	-0.0751398	0.114	0.096	1
Ccdc97	0.157809	0.198182	0.142358	0	0.254707	0.229222	0.412911	-0.61126	0.075	0.09	1
Cchcr1	0.0567332	0.0165828	0.0690889	0	0.0167913	0.00952887	0.27203	1.66362	0.015	0.006	1
Ccl12	1.84208	1.6969	1.97473	0	2.64514	2.28782	6.63231e-05	-1.013	0.483	0.569	1
Ccl19	0	0.0170318	0.0388469	0	0.036781	0.0197226	0.686228	-0.216739	0.013	0.01	1
Ccl25	0.166779	0.182084	0.0993481	0	0.0621245	0.168058	0.0280398	0.28988	0.079	0.039	1
Ccl26	0.282987	0.0454798	0.0174209	0	0.151463	0	0.171982	-0.144973	0.032	0.016	1
Ccl27a	0.0505178	0.0473918	0.0235386	0	0.0659899	0.0603078	0.174145	-0.806238	0.017	0.032	1
Ccl3	1.85555	1.70022	1.70845	3.09266	1.87218	1.78211	0.363749	-0.186153	0.464	0.476	1
Ccl4	1.89603	2.32719	1.99221	2.84382	2.49256	2.412	0.0125204	-0.556696	0.406	0.492	1
Ccl6	2.62095	2.75206	2.87843	2.51178	2.60433	2.70641	0.0148536	0.220761	0.85	0.772	1
Ccl9	1.95625	2.21413	2.21867	2.37106	2.14494	2.14867	0.0801151	0.0521546	0.807	0.695	1
Ccm2	0.368905	0.386369	0.531958	0	0.337447	0.418788	0.00643679	0.340248	0.24	0.148	1
Ccn1	0.467366	0.988841	1.01958	0	0.4984	1.36212	0.540236	-0.156424	0.277	0.251	1
Ccn2	0.104435	0.120859	0.243144	0	0.697827	0.168257	0.00155973	-1.61217	0.06	0.122	1
Ccn3	0.102817	0.242305	0.06323	0	0.350521	0.125602	0.286703	-0.945597	0.045	0.061	1
Ccnb1ip1	0.046263	0.0390007	0.0367233	0	0.0784465	0.0351915	0.985803	-0.574313	0.019	0.019	1
Ccnc	0.183272	0.147368	0.254807	0	0.266774	0.259264	0.34983	-0.384959	0.105	0.08	1
Ccnd1	0.955277	0.626589	0.924717	0	1.11642	0.917758	0.0243221	-0.448243	0.281	0.338	1
Ccnd2	0.135832	0.11614	0.326083	0	0.311031	0.294382	0.821154	-0.465744	0.084	0.077	1
Ccnd3	1.34531	0.870097	0.887091	0	0.71779	1.212	0.673285	-0.0362255	0.451	0.415	1
Ccndbp1	0.32147	0.307667	0.283079	0.962458	0.179338	0.250419	0.0283911	0.501002	0.137	0.084	1
Ccnf	0.0441839	0.00948859	0.00953077	0	0.0092631	0.0364654	0.886499	-0.578028	0.011	0.01	1
[truncated: 10,043 more rows]

## Sheet: DEC_resimac_NDvsD (STZ)
Genes	RNA.D1	RNA.D2	RNA.D3	RNA.ND1	RNA.ND2	RNA.ND3	p_val	avg_log2FC	pct.1	pct.2	p_val_adj
Uba52	1.93391	3.16821	1.58082	22.7586	24.475	16.7187	7.67652e-166	-2.78852	0.593	0.978	1.60317e-161
Gm10076	2.52063	6.52379	2.29746	21.6852	26.0029	20.599	4.31774e-162	-2.30249	0.744	0.992	9.01717e-158
Rpl35	10.3541	11.5047	11.3325	19.345	22.6772	21.9577	8.64832e-82	-0.915044	0.975	0.986	1.80612e-77
Rpl41	35.4534	32.0338	36.3459	24.0914	24.3155	23.2848	3.08156e-46	0.506477	0.998	0.992	6.43552e-42
Fxyd2	6.52843	9.62483	10.1499	4.40872	3.10967	3.25337	3.66061e-35	1.16305	0.825	0.546	7.64482e-31
Wdr89	0.28261	0.307621	0.171965	1.64165	1.30252	0.66342	1.97616e-31	-0.785825	0.098	0.391	4.12701e-27
Serinc3	18.287	20.2284	18.954	13.6849	13.982	13.3436	5.6895e-30	0.458492	0.988	0.988	1.18819e-25
Fth1	111.201	92.4064	107.846	79.8999	76.8434	83.0112	8.24706e-29	0.37236	1	1	1.72232e-24
Rpl38	20.596	26.8899	20.9669	25.7149	32.8763	31.7514	1.96774e-28	-0.416645	0.99	0.998	4.10942e-24
Rps27	25.7402	31.3161	28.3612	31.0145	39.0083	40.7053	2.46498e-28	-0.394472	0.993	0.998	5.14786e-24
Rpl39	26.8154	25.2799	26.9462	27.8087	38.8204	37.0678	3.08017e-28	-0.446951	0.993	0.994	6.43262e-24
mt-Nd4l	3.70785	4.72	4.63898	5.42239	8.28232	7.18189	7.0954e-28	-0.639759	0.797	0.916	1.4818e-23
mt-Nd3	1.26645	2.38255	1.51605	3.01073	4.41211	3.1531	1.68079e-27	-0.779378	0.517	0.759	3.51017e-23
Bloc1s1	0.281702	0.270436	0.253827	1.36515	1.12741	0.928583	3.76812e-27	-0.734261	0.106	0.376	7.86934e-23
Ly6e	6.12437	5.86719	3.9986	10.6556	11.8219	7.02594	6.73952e-27	-0.805829	0.732	0.877	1.40748e-22
Rps29	88.5279	128.576	96.5797	113.108	139.795	134.049	7.31373e-27	-0.320431	0.993	1	1.5274e-22
Ninj1	12.6326	12.4284	13.9136	9.11601	6.99662	8.81466	2.30244e-26	0.638819	0.942	0.869	4.80842e-22
S100a4	4.76616	6.98012	8.19054	1.66261	2.81699	2.02383	2.47009e-26	1.20027	0.574	0.272	5.15853e-22
Gm2000	1.29126	0.879339	0.871202	0.168998	0.205188	0.255391	1.19533e-24	0.721154	0.344	0.09	2.49633e-20
S100a6	7.88016	10.1807	9.19458	4.16207	4.39381	3.59369	2.03169e-24	0.995988	0.729	0.47	4.24298e-20
Malat1	148.899	261.103	167.481	242.126	281.724	252.382	3.28853e-24	-0.423868	0.992	0.994	6.86777e-20
Cst3	84.4054	68.8056	75.7706	59.3525	52.471	68.4296	5.02129e-24	0.360573	0.998	0.996	1.04865e-19
Selenop	46.9893	55.5032	57.1786	43.0644	37.1973	38.1229	3.1752e-23	0.459729	0.995	0.99	6.63109e-19
Rps21	26.0165	29.2321	27.3479	34.1365	37.5497	32.4007	8.54019e-23	-0.3406	0.993	0.994	1.78353e-18
Rps28	32.5123	45.1591	32.7863	37.2692	49.2043	49.2402	1.5958e-21	-0.320925	0.995	0.994	3.33267e-17
Rps18	17.9322	14.9439	17.5742	10.4972	11.5394	14.2305	1.61192e-21	0.423874	0.98	0.969	3.36633e-17
Tagln	2.78793	2.92615	2.51951	0.645053	1.94094	1.13772	7.67834e-21	0.619745	0.676	0.419	1.60355e-16
Lst1	2.28967	2.567	2.60186	3.6515	5.11794	4.02547	1.62074e-20	-0.653802	0.512	0.748	3.38476e-16
Mgl2	7.14455	6.1326	6.23556	12.8567	10.4117	10.0891	5.78265e-20	-0.656228	0.722	0.865	1.20765e-15
Lgmn	11.8727	9.59789	10.8319	6.04837	6.87386	9.50776	9.82674e-19	0.451374	0.972	0.9	2.05222e-14
Ftl1	96.4888	82.3221	87.1087	86.0149	70.5157	72.5368	2.51264e-17	0.247345	0.998	0.996	5.24739e-13
Rpl11	18.8716	14.8664	18.3374	13.2441	12.2872	15.3634	2.64833e-17	0.333491	0.988	0.977	5.53076e-13
Pid1	11.6635	10.3606	8.70851	17.2021	14.1322	13.5814	1.21182e-16	-0.469157	0.931	0.965	2.53077e-12
Card19	3.61732	2.9158	3.42204	1.65325	1.68549	2.15193	4.03235e-16	0.60234	0.707	0.509	8.42116e-12
Hpgd	4.57828	6.67609	5.3849	2.79378	3.311	3.9052	5.83062e-16	0.591798	0.808	0.683	1.21767e-11
Rps27rt	0.791882	0.535366	0.581384	0.258469	0.081509	0.160659	6.25076e-16	0.513893	0.226	0.055	1.30541e-11
Bri3	7.14726	6.15478	6.42737	4.21899	4.52213	4.9342	6.9003e-16	0.431157	0.893	0.822	1.44106e-11
H2-K1	8.62783	9.27286	7.72021	11.7892	14.3752	10.6218	7.66171e-16	-0.516669	0.937	0.967	1.60007e-11
mt-Co3	25.0125	30.1794	27.5329	39.9266	35.5135	28.9639	8.1073e-16	-0.295006	0.997	0.998	1.69313e-11
Tns1	1.92566	2.75585	2.22404	1.25389	0.809164	1.53584	8.05067e-15	0.6529	0.536	0.337	1.6813e-10
Ttc39c	0.192193	0.429472	0.870752	0.0203219	0.0387105	0.0674216	2.42334e-14	0.521081	0.15	0.02	5.0609e-10
Rps7	17.3063	13.0459	17.2469	11.0021	11.186	15.0776	3.01254e-14	0.318709	0.975	0.955	6.29139e-10
Fcna	3.10442	4.12366	4.44341	1.14061	1.913	2.46504	3.05373e-14	0.742446	0.531	0.323	6.3774e-10
Srsf9	1.79718	1.29063	1.40833	0.804701	0.774997	0.783414	3.98465e-14	0.476627	0.486	0.262	8.32154e-10
Hint1	5.83807	5.1554	5.95557	3.65477	3.9784	3.99247	4.05756e-14	0.42715	0.871	0.775	8.4738e-10
Lyz2	125.263	145.215	141.532	108.461	109.382	114.066	9.50771e-14	0.315851	0.998	0.996	1.98559e-09
Cd36	6.12786	5.8391	5.33233	3.56936	3.12184	4.84814	1.02449e-13	0.510932	0.783	0.626	2.13954e-09
Rpl9	19.0135	10.6796	17.2179	10.5589	11.0906	13.3063	1.08184e-13	0.360709	0.974	0.969	2.25931e-09
Ppia	21.9689	15.7894	20.1658	13.1332	14.1455	18.0917	1.21415e-13	0.308932	0.995	0.984	2.53564e-09
Pfn1	15.0929	8.11428	11.9452	6.3413	7.16076	12.1662	1.6565e-13	0.378867	0.945	0.906	3.45944e-09
Gpx3	1.19761	1.15381	1.65008	0.338018	0.339148	0.513285	2.15273e-13	0.738793	0.304	0.127	4.49575e-09
Vsig4	2.11856	2.38602	3.62341	0.525267	1.58776	0.878883	2.47365e-13	0.773691	0.345	0.155	5.16597e-09
Cd52	2.46656	2.12011	1.55727	3.63336	4.44656	3.9711	2.49648e-13	-0.756091	0.41	0.579	5.21364e-09
Hist2h2aa1	0.0868846	0.172831	0.0694727	0.530202	0.642031	0.274859	2.50576e-13	-0.434995	0.043	0.176	5.23303e-09
Fgfr1	0.911487	1.36444	1.68186	0.788055	0.5241	0.685068	2.67612e-13	0.51943	0.395	0.194	5.58882e-09
Lgals3	1.85218	2.1669	2.391	0.967664	0.924162	0.542896	4.72607e-13	0.793819	0.382	0.194	9.86992e-09
Rpl29	10.0947	9.6459	10.424	7.7638	7.68386	7.76129	6.42778e-13	0.338475	0.954	0.91	1.34238e-08
App	5.26218	5.58556	4.51941	7.17865	7.85532	7.74224	8.35049e-13	-0.499568		0.902	1.74392e-08
Rbm3	3.45013	1.84297	3.48191	1.561	1.51838	2.01896	9.67399e-13	0.521624	0.666	0.493	2.02032e-08
Trem2	3.64743	3.75194	3.85252	2.86858	2.10959	2.18623	9.85069e-13	0.535994	0.691	0.521	2.05722e-08
S100a10	4.85501	5.98381	6.21326	3.24974	3.20447	3.89562	1.16383e-12	0.600375	0.754	0.605	2.43054e-08
Ndufb1-ps	2.42352	3.65998	2.15927	2.90624	4.38592	4.55867	2.74307e-12	-0.438384	0.699	0.802	5.72862e-08
mt-Atp8	1.04477	2.56468	1.04482	1.5262	2.80493	2.99886	4.23262e-12	-0.467534	0.441	0.626	8.8394e-08
Nupr1	2.09943	2.87116	2.42243	1.26517	1.61364	1.51216	5.01875e-12	0.474146	0.572	0.36	1.04812e-07
Cd63	10.1514	9.20682	9.90857	8.58402	6.75769	7.59954	5.56577e-12	0.356872	0.942	0.916	1.16235e-07
Bank1	2.13629	1.86654	2.25075	3.76365	3.82094	2.83058	5.73464e-12	-0.551348	0.499	0.656	1.19762e-07
Rpl19	19.4229	16.3519	18.7644	13.8928	14.379	16.488	9.52499e-12	0.256532	0.983	0.98	1.9892e-07
Mef2c	6.99631	7.07367	6.82422	10.027	9.26696	9.12714	1.50153e-11	-0.379284	0.898	0.932	3.1358e-07
Lpl	0.564762	0.245581	1.12898	0.206207	0.0750786	0.0828048	2.30924e-11	0.558864	0.155	0.035	4.82263e-07
Slc6a6	3.51647	3.94295	3.5291	2.06653	2.03069	3.07017	2.65626e-11	0.477367	0.724	0.605	5.54733e-07
Rpl8	16.5965	16.3715	17.3035	14.0895	13.32	14.6175	2.78206e-11	0.254122	0.983	0.977	5.81005e-07
Rplp2	13.6984	13.524	13.6054	15.6628	17.8296	15.6372	2.9486e-11	-0.280104	0.975	0.977	6.15786e-07
Acta2	6.0777	6.25275	4.93047	3.27172	5.39337	3.65111	3.89727e-11	0.315896	0.899	0.796	8.13905e-07
Timp2	10.2493	11.7963	11.255	8.45444	8.40947	8.31018	4.3169e-11	0.372911	0.972	0.928	9.01541e-07
H2-Q7	0.181381	0.289859	0.23149	0.435003	0.957093	0.574241	5.72277e-11	-0.489013	0.079	0.215	1.19514e-06
Fyb	2.49146	2.94246	2.66085	3.51039	4.97886	3.51335	8.7799e-11	-0.496077	0.646	0.742	1.83359e-06
mt-Nd2	6.16956	8.01776	6.30768	9.07408	9.9387	7.98661	9.76527e-11	-0.361046	0.902	0.941	2.03938e-06
Rpl36a	6.45296	5.3578	6.71031	7.44287	8.94147	7.75949	1.08067e-10	-0.383215	0.876	0.91	2.25688e-06
H2-Aa	8.54024	10.3925	15.6002	18.1639	31.322	16.7152	1.29226e-10	-1.01515	0.379	0.542	2.69877e-06
Jdp2	2.13132	1.72645	1.55736	1.26281	0.883381	1.13126	1.30309e-10	0.459209	0.494	0.297	2.72137e-06
Ltc4s	7.66882	5.86808	8.58754	5.07836	4.70985	5.73595	1.61811e-10	0.440617	0.843	0.722	3.37926e-06
Fkbp5	2.06728	2.58179	2.68911	0.549572	0.934538	2.21928	1.86303e-10	0.612234	0.526	0.354	3.89075e-06
Rps3	16.3412	14.3131	16.1795	11.8428	12.3656	14.6319	2.23013e-10	0.241435	0.979	0.978	4.6574e-06
Hsp90b1	6.49343	7.81651	6.39069	8.5405	9.59873	8.38258	3.00957e-10	-0.331354	0.881	0.896	6.2852e-06
Runx1	3.98835	4.27284	3.85991	8.52861	5.59153	5.40805	3.44119e-10	-0.488385	0.744	0.812	7.18658e-06
Capg	1.50971	2.82272	2.12818	1.47244	1.45187	1.21706	4.00594e-10	0.427545	0.489	0.297	8.36601e-06
mt-Cytb	13.6563	14.4172	15.3145	18.5708	18.9303	15.5284	4.23998e-10	-0.280715	0.992	0.99	8.85478e-06
Rps2	14.947	12.694	14.0978	11.4995	10.6062	12.0866	4.38052e-10	0.27635	0.972	0.959	9.14827e-06
Cd74	35.7154	33.1237	54.8999	63.0702	84.0697	52.231	4.93634e-10	-0.764761	0.602	0.746	1.0309e-05
Rps10	23.2649	17.8455	21.6438	18.1247	16.9849	17.8784	5.90241e-10	0.231415	0.993	0.98	1.23266e-05
Zfp36l2	4.35726	4.37675	5.74416	3.60977	3.67596	3.37872	6.06871e-10	0.345513	0.82	0.683	1.26739e-05
H3f3a	13.1299	9.92414	11.0356	8.49806	8.79257	9.87151	6.99329e-10	0.281884	0.962	0.949	1.46048e-05
Rpl37	30.4109	32.7812	28.8542	32.1918	38.9018	35.7501	7.6423e-10	-0.242765	0.995	1	1.59602e-05
Slc15a3	0.931966	1.56471	0.64306	1.66399	2.14225	1.75107	7.9876e-10	-0.494298	0.312	0.477	1.66813e-05
H2-Ab1	8.52097	11.7096	16.4685	18.8208	30.6423	17.1915	8.69621e-10	-0.925231	0.42	0.579	1.81612e-05
Tanc2	2.52929	2.16332	2.53806	4.06453	3.14733	3.43107	1.0591e-09	-0.378067	0.552	0.693	2.21182e-05
Prdx1	8.46539	7.74118	8.10076	5.73031	5.81909	8.52137	1.49764e-09	0.246741	0.912	0.853	3.12767e-05
Rpl37a	41.4377	41.9693	41.2863	43.0983	50.0916	47.2469	1.66349e-09	-0.198513	0.993	0.994	3.47404e-05
Ptms	3.98345	3.69698	3.94464	2.773	2.80498	2.30696	1.7709e-09	0.416625	0.732	0.603	3.69834e-05
Rplp1	39.274	37.2911	42.679	48.4704	47.6951	41.0181	2.16427e-09	-0.203192	0.995	0.996	4.51986e-05
Ext1	2.59667	2.87089	2.53207	4.92449	4.54649	4.19391	2.42636e-09	-0.581838	0.583	0.677	5.0672e-05
Son	3.01483	3.06381	2.5654	4.03061	4.23333	4.08799	2.66908e-09	-0.40462	0.699	0.798	5.57411e-05
Ddx5	6.98432	7.97688	7.621	10.2055	10.28	8.50344	2.74369e-09	-0.322695	0.942	0.947	5.72991e-05
H2-Eb1	10.3879	11.6846	17.2798	18.4424	32.0141	19.9152	2.90132e-09	-0.920741	0.387	0.542	6.05911e-05
Rps8	22.7929	24.2365	24.7389	29.5144	29.3922	25.2601	2.97677e-09	-0.222466	0.988	0.988	6.21668e-05
Ctsh	5.78864	5.44606	5.65408	7.99202	7.22293	6.83969	3.37874e-09	-0.318238	0.861	0.89	7.05616e-05
Fam174a	1.71203	1.84241	1.71054	0.663277	1.02092	1.35863	3.55071e-09	0.423356	0.514	0.35	7.4153e-05
Csrp2	1.15159	1.72082	1.20682	0.473293	0.98092	0.526927	3.68628e-09	0.452705	0.43	0.256	7.69842e-05
Plekha3	0.482166	0.518739	0.426967	0.295581	0.170332	0.180351	4.06207e-09	0.304319	0.2	0.074	8.48323e-05
Lifr	2.32435	3.82951	3.41208	1.51422	1.86224	2.67588	4.47864e-09	0.475175	0.651	0.497	9.35318e-05
Pkm	2.31552	2.61448	2.27033	1.86854	1.53886	1.50528	5.08296e-09	0.398106	0.613	0.44	0.000106153
Marcks	6.43491	6.01611	6.38909	7.25169	7.76942	8.5674	5.15018e-09	-0.296884	0.86	0.91	0.000107556
Fcrls	5.34088	5.01783	4.95731	9.44688	7.05114	6.27312	6.87007e-09	-0.438624	0.77	0.84	0.000143475
Maf	16.7477	22.3859	16.1452	12.3107	14.6619	18.5652	6.95565e-09	0.26042	0.977	0.947	0.000145262
Hprt	1.63263	1.75716	1.97325	0.948687	0.974762	1.47254	7.71723e-09	0.391531	0.527	0.38	0.000161167
Klf9	1.31217	1.95046	1.42636	0.516278	0.62224	1.36603	7.98918e-09	0.49727	0.415	0.256	0.000166846
Asah1	2.9924	3.3087	2.85922	2.13328	2.17393	2.05525	9.99195e-09	0.379175	0.704	0.554	0.000208672
Rasgrp3	0.766169	1.25602	0.778532	0.331245	0.519852	0.652616	1.34353e-08	0.358163	0.319	0.168	0.000280582
Cdk14	1.24879	1.47109	1.22165	1.93442	2.28233	2.15636	1.3901e-08	-0.450813	0.403	0.54	0.000290309
Lgals1	11.9866	10.1831	10.3714	9.71761	8.46503	8.16448	1.46027e-08	0.29499	0.945	0.873	0.000304963
Hnrnpk	3.25023	3.16032	3.55239	2.15187	2.20605	2.72649	1.59736e-08	0.360642	0.736	0.62	0.000333592
Atp5g2	4.51939	3.52403	4.35107	2.36641	2.65734	3.90421	1.63812e-08	0.350063	0.793	0.677	0.000342106
Cebpa	1.0268	0.757047	0.869101	0.503979	0.375973	0.391595	1.74604e-08	0.415681	0.304	0.164	0.000364644
Myo5a	3.56934	3.84412	4.02742	2.76068	2.50532	2.93587	1.80545e-08	0.385802	0.757	0.622	0.000377051
Gm15726	0.668704	0.549295	1.32468	1.19959	1.64537	1.35454	1.99749e-08	-0.430307	0.261	0.411	0.000417156
Cd300ld	1.98053	1.78499	1.57377	2.84456	2.68828	2.55366	2.05171e-08	-0.404654	0.489	0.628	0.000428479
Gm11808	0.743662	0.303736	0.493805	0.107882	0.197439	0.217317	2.0558e-08	0.335586	0.193	0.076	0.000429333
Pde7b	1.2281	1.0703	0.634401	1.67122	1.595	1.5703	2.10271e-08	-0.394722	0.228	0.387	0.000439131
Hmox1	3.3025	3.29733	3.37182	2.84021	2.19095	2.3512	2.2124e-08	0.361582	0.696	0.566	0.000462038
Relb	0.505974	0.472243	0.398883	0.726643	0.848869	1.01962	2.24767e-08	-0.365044	0.167	0.305	0.000469404
Apoe	280.48	320.078	305.753	237.339	258.503	250.842	2.6499e-08	0.266955	0.993	0.986	0.000553406
Tcn2	3.21724	3.90421	2.98455	1.95035	2.54888	2.36352	2.70555e-08	0.38266	0.704	0.579	0.000565026
Slc8a1	5.45935	4.43371	5.09447	7.39862	7.43208	6.19339	2.81227e-08	-0.432778	0.737	0.81	0.000587314
Vapa	1.81395	2.19456	2.19196	1.44897	1.21048	1.59411	2.90221e-08	0.373821	0.597	0.442	0.000606098
Gas6	5.96508	5.42595	6.3528	4.56586	4.41696	4.83869	3.07201e-08	0.303833	0.86	0.773	0.000641558
Vat1	0.78473	1.03109	0.845606	0.559923	0.403649	0.327499	3.2219e-08	0.428871	0.298	0.159	0.000672862
Nr1d2	0.354536	0.250298	0.416823	0.0727817	0.0649269	0.180827	3.28219e-08	0.275736	0.136	0.039	0.000685452
Mtdh	1.68852	2.36223	3.00385	1.47442	1.10002	1.86557	3.85316e-08	0.480297	0.55	0.423	0.000804695
Gm20513	0.413365	0.663101	0.58808	0.755181	1.33565	1.09047	4.30752e-08	-0.458563	0.142	0.276	0.000899583
Plxna4	0.647577	0.821577	0.888696	1.81744	1.33892	1.11655	4.64742e-08	-0.398616	0.235	0.384	0.000970568
Hgsnat	1.35679	2.62651	1.7437	0.837886	1.08418	1.10704	4.7859e-08	0.53419	0.448	0.301	0.000999488
Sgk1	0.370642	0.794231	0.896154	0.237428	0.269508	0.29772	5.32365e-08	0.416977	0.223	0.102	0.00111179
mt-Atp6	35.6243	34.3029	35.4856	43.7072	42.0827	35.4137	6.43568e-08	-0.19505	0.998	0.998	0.00134403
Pkib	0.204954	0.440916	0.505433	0.0451803	0.105893	0.183367	6.65994e-08	0.313485	0.152	0.053	0.00139086
Cox7c	5.68202	4.67674	5.57894	5.05537	7.23405	6.59024	7.39328e-08	-0.281433	0.866	0.92	0.00154401
Atp5h	5.0567	4.14653	4.69551	3.11086	3.51707	4.09488	9.12492e-08	0.276478	0.851	0.748	0.00190565
Rhoa	5.74503	6.06534	6.45738	5.40273	4.61244	4.96686	1.01659e-07	0.272299	0.896	0.834	0.00212305
Oas1a	0.17354	0.243549	0.192524	0.423925	0.499667	0.568263	1.04483e-07	-0.321113	0.083	0.192	0.00218201
H2-DMa	1.8734	1.7924	2.27888	2.5307	3.00603	2.93604	1.21194e-07	-0.389733	0.382	0.544	0.00253101
Grn	10.7167	13.0321	10.5794	11.0018	9.24513	8.48327	1.21969e-07	0.279365	0.95	0.92	0.00254721
Selenom	1.84045	2.01553	2.2407	0.966435	1.27571	1.63678	1.22272e-07	0.381049	0.554	0.419	0.00255354
Tpm2	1.29764	1.29387	1.15122	0.353435	1.0011	0.684628	1.31781e-07	0.338484	0.41	0.25	0.00275211
Ndufb10	2.37557	1.80564	2.21671	1.51047	1.31813	1.70532	1.32932e-07	0.328589	0.62	0.452	0.00277615
Cox4i1	6.85798	6.59541	6.95739	6.17012	5.26485	5.33573	1.44463e-07	0.270395	0.919	0.875	0.00301696
Eif4g2	2.93918	2.64743	3.00799	2.01352	1.97843	2.12207	1.63158e-07	0.34577	0.688	0.558	0.00340739
Sdcbp	3.77937	3.556	3.53199	2.23904	2.89882	2.85961	1.75908e-07	0.295383	0.765	0.646	0.00367365
Tlr7	1.82717	2.24614	1.69569	0.937608	1.40782	1.59634	1.81791e-07	0.308186	0.554	0.393	0.00379653
Lrmda	1.94988	2.27789	2.23297	4.18826	3.60855	2.75167	2.30721e-07	-0.491995	0.44	0.556	0.00481838
Rpl3	11.108	9.70868	11.8684	9.73587	8.38124	9.77158	2.41422e-07	0.230747	0.945	0.924	0.00504185
Dleu2	2.02978	2.31463	2.70654	3.56971	3.42612	3.42976	2.49345e-07	-0.409607	0.582	0.677	0.00520732
Atp5k	1.87169	3.36105	2.24557	3.26543	3.77059	3.05568	2.56493e-07	-0.324353	0.65	0.74	0.00535659
Tgfbi	6.90025	5.65233	7.29254	5.45713	4.96897	5.48581	2.60907e-07	0.279341	0.906	0.802	0.00544878
Mir142hg	2.54706	2.59713	2.76997	3.86482	3.77678	3.74359	2.65888e-07	-0.395149	0.598	0.695	0.0055528
Cd163	8.58874	12.4713	11.4677	5.62473	7.58647	10.3119	3.043e-07	0.401469	0.798	0.72	0.006355
Hspa1a	0.829142	1.09458	0.461715	2.65016	1.81428	0.86517	3.12568e-07	-0.562055	0.197	0.325	0.00652768
Serpinb6a	3.92653	5.31679	4.71809	3.3219	3.4507	3.53629	3.1268e-07	0.357503	0.787	0.677	0.00653001
Tsc22d3	5.55025	6.42275	7.78201	3.84186	3.73655	6.90313	3.1526e-07	0.401497	0.807	0.732	0.00658389
Pla2g7	4.31462	4.84973	4.83629	2.17711	3.1062	4.77497	3.29534e-07	0.352235	0.788	0.705	0.00688199
Creb5	1.40674	1.87702	1.29111	3.08117	2.57732	2.2996	3.83747e-07	-0.493091	0.37	0.499	0.00801418
Zeb2	10.3591	10.7042	9.25277	13.525	13.0618	11.8232	3.86876e-07	-0.305346	0.916	0.947	0.00807952
Jun	3.19493	4.11045	3.89514	5.95178	5.48728	5.02269	3.90171e-07	-0.432388	0.698	0.759	0.00814833
Srgap2	4.15489	3.5462	3.50213	2.74319	2.58069	2.88372	4.697e-07	0.347616	0.722	0.638	0.00980921
Maml2	2.35554	1.73474	1.85036	3.50757	3.10097	2.85899	5.19256e-07	-0.471157	0.473	0.577	0.0108441
0610012G03Rik	1.73525	1.42389	1.77897	1.19866	1.04569	1.15581	5.61036e-07	0.319099	0.519	0.376	0.0117167
Egr1	1.0926	2.343	1.65435	2.36885	2.94221	2.5636	6.8072e-07	-0.436438	0.402	0.524	0.0142162
Btg2	3.94952	3.9343	4.26162	6.25497	5.23311	6.13181	7.38727e-07	-0.411611	0.731	0.783	0.0154276
Atp6v1f	4.15976	3.63246	3.99109	2.82975	3.10251	3.24393	8.84372e-07	0.260786	0.812	0.697	0.0184692
Fcgrt	9.03884	8.93113	10.2879	7.2648	7.85546	7.19923	8.96442e-07	0.284154	0.921	0.871	0.0187213
Ncf1	2.23567	2.23115	2.46384	1.57886	1.4398	1.8164	9.20493e-07	0.355744	0.595	0.462	0.0192236
Nptn	1.6401	1.86494	2.09817	1.59241	1.33541	1.13347	9.42212e-07	0.306995	0.547	0.397	0.0196772
Chchd2	6.78542	6.05709	6.67806	4.70458	4.93876	5.9888	9.44279e-07	0.264538	0.898	0.853	0.0197203
Fkbp1a	3.42546	3.16108	3.33612	2.47626	2.51493	2.25138	1.03371e-06	0.327158	0.732	0.607	0.021588
Rps3a1	22.5909	18.5156	22.4439	18.2162	16.7414	20.7557	1.05579e-06	0.190622	0.993	0.988	0.0220492
Gm4951	0.822476	1.13374	0.577087	1.29689	1.49647	1.74738	1.14623e-06	-0.446344	0.281	0.401	0.0239378
Cstb	2.58744	3.129	2.92969	1.68118	2.08267	2.718	1.16136e-06	0.283572	0.678	0.519	0.0242538
Taco1	0.305956	0.310716	0.146667	0.0484617	0.084408	0.0453928	1.24981e-06	0.238567	0.109	0.033	0.0261009
Phb2	0.873143	0.899127	0.999431	0.511229	0.539248	0.692645	1.26414e-06	0.281845	0.359	0.221	0.0264004
Pmp22	4.9733	4.4784	4.23574	4.70893	3.60965	3.0763	1.47284e-06	0.255027	0.815	0.706	0.0307588
Rnf150	3.43975	2.53073	2.94273	5.21389	3.70377	4.31742	1.52004e-06	-0.396525	0.648	0.716	0.0317446
Akr1a1	5.84246	5.63608	4.87096	4.38099	4.15891	4.61772	1.57552e-06	0.272174	0.878	0.761	0.0329032
Nlrp1b	0.273414	0.232319	0.267617	0.868784	0.56095	0.472953	1.60169e-06	-0.341839	0.101	0.2	0.0334498
Rnaset2b	0.899293	0.623439	0.471558	0.357455	0.28917	0.514927	1.90657e-06	0.272675	0.251	0.137	0.0398167
Srp9	1.88998	1.21648	1.83805	1.29548	0.914082	1.39257	1.91617e-06	0.293617	0.512	0.37	0.0400173
Rabac1	4.33644	4.50404	4.59964	3.58258	3.39877	3.87332	2.09634e-06	0.259131	0.84	0.748	0.04378
Taok3	1.15647	1.02918	0.954476	1.92745	1.57299	1.49198	2.37384e-06	-0.355468	0.362	0.479	0.0495753
Capza2	4.70412	3.8276	4.22002	2.65709	3.24068	4.12265	2.41377e-06	0.243986	0.826	0.724	0.0504092
Ctsc	14.8976	12.8645	13.6772	18.7281	15.1411	15.603	2.67046e-06	-0.203085	0.975	0.973	0.05577
Slc9a9	8.38792	8.31306	7.79207	12.2092	10.3577	8.89355	2.67686e-06	-0.295102	0.912	0.894	0.0559035
Ndfip1	5.37166	5.01142	5.24457	4.95872	3.81546	4.45815	2.69608e-06	0.243215	0.858	0.773	0.0563049
Slfn8	0.186229	0.200307	0.143459	0.465712	0.495181	0.593785	2.85662e-06	-0.368275	0.078	0.164	0.0596577
Ccnd2	0.22485	0.318024	0.135458	0.590785	0.694857	0.46062	2.87128e-06	-0.379123	0.073	0.16	0.0599637
Cx3cr1	1.62264	1.84606	1.55718	2.48849	2.35732	3.17857	3.06186e-06	-0.438049	0.314	0.448	0.063944
Aoah	1.49744	1.44279	1.41619	2.026	2.46877	1.98275	3.15866e-06	-0.399396	0.431	0.542	0.0659655
Emp1	0.671671	1.05942	1.0662	0.678611	0.552212	0.484589	3.27999e-06	0.322305	0.268	0.155	0.0684994
Calr	3.34873	4.9229	3.57857	6.56725	5.60482	4.14979	3.32275e-06	-0.335563	0.749	0.796	0.0693923
Rpl15	13.0522	10.6098	12.0011	10.4171	9.48824	10.8592	3.39596e-06	0.205535	0.965	0.951	0.0709212
Nfkbiz	2.27338	2.40359	1.98346	3.27484	3.05054	3.71491	3.41556e-06	-0.413106	0.557	0.644	0.0713305
Smim14	1.79993	1.51535	1.81012	0.970744	1.16356	1.39221	3.44984e-06	0.293978	0.529	0.393	0.0720464
Rpl6	14.096	18.4401	14.6035	18.8562	18.6068	17.6242	3.72062e-06	-0.194858	0.982	0.982	0.0777013
Aif1	4.66808	2.85102	3.23997	5.25786	4.79101	4.31191	3.78698e-06	-0.34061	0.699	0.763	0.0790874
Ifitm3	12.9659	12.9225	11.7125	14.9179	16.7691	15.1486	3.99622e-06	-0.319645	0.939	0.953	0.0834571
Sept7	2.25642	2.52463	2.67185	1.9104	1.97043	1.74701	4.21933e-06	0.272809	0.655	0.519	0.0881164
Prkcb	2.64775	2.74991	2.41243	3.75641	3.48134	3.10769	5.94177e-06	-0.290386	0.598	0.699	0.124088
Cd83	2.56483	2.52661	2.36967	4.11418	3.55902	3.41008	5.95859e-06	-0.404753	0.55	0.644	0.124439
Taf1d	0.438172	0.811421	0.529909	1.13667	1.14644	0.872511	5.99578e-06	-0.355903	0.213	0.329	0.125216
Tomm7	3.95813	3.32011	3.59676	3.11171	4.75798	5.11353	6.36923e-06	-0.272198	0.769	0.806	0.133015
Otulinl	1.36436	1.20778	1.09349	0.937185	0.851296	0.757615	6.49114e-06	0.271356	0.4	0.262	0.135561
Tra2a	1.60114	1.91201	1.81236	2.78509	2.42561	2.13239	6.70687e-06	-0.288105	0.473	0.577	0.140066
Rpl18	14.3508	11.3059	12.9907	12.2743	10.6203	11.3228	6.80817e-06	0.179481	0.972	0.969	0.142182
Tmem176a	3.88249	3.26095	3.13022	5.5754	5.41793	3.71169	6.99872e-06	-0.424153	0.674	0.742	0.146161
4933406I18Rik	0.834583	0.672413	0.709748	1.66106	1.29323	1.01063	7.10327e-06	-0.392007	0.223	0.335	0.148345
Rin2	2.04761	3.10012	2.68618	1.69423	1.71919	1.91579	7.17749e-06	0.394768	0.595	0.499	0.149895
Trim30d	0.389027	0.526971	0.425835	0.850132	0.813924	0.873081	7.19499e-06	-0.340155	0.162	0.274	0.15026
H2-D1	10.6402	10.1748	9.2221	8.70909	13.429	10.9925	7.26169e-06	-0.213744	0.94	0.947	0.151653
Oasl2	0.509544	0.36698	0.230395	0.824682	0.695636	0.75677	7.33468e-06	-0.347967	0.131	0.229	0.153177
Fgl2	0.203952	0.195434	0.142355	0.645706	0.577632	0.289247	8.05633e-06	-0.345106	0.081	0.164	0.168248
Etv6	1.61396	1.29387	1.35786	2.26608	2.30227	1.68911	8.22557e-06	-0.364161	0.403	0.511	0.171783
Uqcrfs1	0.851766	0.734481	0.758467	0.564323	0.385213	0.664565	8.55701e-06	0.238564	0.314	0.192	0.178705
Birc3	0.758875	0.765858	0.668345	1.31107	1.18966	1.25672	8.93855e-06	-0.366467	0.261	0.37	0.186673
Tnpo2	0.222802	0.179722	0.342742	0.0714102	0.0933106	0.119121	9.10289e-06	0.181992	0.112	0.039	0.190105
Dennd4c	0.711897	0.68998	0.593761	0.434804	0.312808	0.433529	9.41179e-06	0.27818	0.251	0.141	0.196556
Sh3bp5	1.31913	1.75484	1.08629	0.922349	1.01996	0.963475	1.06329e-05	0.280671	0.464	0.327	0.222058
Cxcl16	1.84919	1.87727	1.31991	2.27799	2.40281	2.33689	1.16885e-05	-0.319679	0.473	0.573	0.244102
Higd2a	2.73897	2.00937	2.28086	1.79271	1.61648	1.6004	1.20171e-05	0.326521	0.598	0.499	0.250966
Camk1d	3.97056	3.71288	3.30777	6.52569	4.81405	3.82199	1.22623e-05	-0.322261	0.722	0.779	0.256086
Nme1	1.63696	1.04241	1.17719	0.692899	0.934581	0.971192	1.25651e-05	0.253539	0.445	0.315	0.26241
Hypk	0.954874	0.632848	0.539041	0.311108	0.324926	0.54936	1.25826e-05	0.288058	0.268	0.16	0.262774
Ppp1r14b	1.96561	1.57556	1.73609	1.06903	1.24293	1.36088	1.31701e-05	0.288773	0.526	0.399	0.275044
Marcksl1	3.18267	2.59285	3.13701	4.73461	3.94529	3.64042	1.36109e-05	-0.341862	0.635	0.722	0.284251
Pde4b	0.688703	0.640737	0.53558	0.956352	1.13252	1.14436	1.45469e-05	-0.374795	0.195	0.301	0.303798
Rps15	3.59253	3.9249	3.89875	5.49435	5.4616	3.61965	1.50474e-05	-0.29069	0.774	0.798	0.31425
Dlc1	0.630731	0.388335	0.702748	1.35334	0.869419	1.21785	1.52042e-05	-0.406541	0.172	0.272	0.317524
Trps1	4.52313	3.99899	4.22205	6.04456	5.48806	5.27788	1.62023e-05	-0.320168	0.742	0.796	0.338368
Fos	4.00258	4.58271	5.33459	6.23163	5.99623	7.35554	1.66817e-05	-0.40293	0.707	0.798	0.34838
Ppp1r14a	0.359844	0.301951	0.36838	0.107291	0.180211	0.186221	1.70577e-05	0.198586	0.149	0.067	0.356233
Sat1	6.72763	8.41245	6.04789	5.41302	5.39391	7.73896	1.73009e-05	0.192271	0.902	0.843	0.361312
Ifi27l2a	24.3805	21.7117	18.8531	26.4857	31.9987	24.6592	1.76842e-05	-0.39146	0.942	0.953	0.369317
Hspa5	4.92838	7.42087	4.64562	7.48493	6.43168	7.14255	1.83207e-05	-0.211834	0.802	0.875	0.382609
Slfn5	0.64563	0.810919	0.607458	0.870617	1.06299	1.46413	1.93268e-05	-0.343578	0.221	0.325	0.403621
H2-DMb1	1.18082	1.28517	1.60377	1.66775	2.32591	1.64132	2.09523e-05	-0.342637	0.283	0.405	0.437567
Anapc13	1.16783	1.16464	1.31036	1.72789	1.75674	1.45736	2.10834e-05	-0.264671	0.393	0.505	0.440305
Pf4	69.267	52.0005	67.998	57.7294	49.0175	61.2486	2.2929e-05	0.190298	0.998	0.992	0.478849
Tmed2	2.25477	2.01482	2.19688	1.23757	1.44237	1.8613	2.30539e-05	0.311486	0.582	0.45	0.481457
Rpl7	14.1891	11.8194	14.4948	12.2444	10.7889	12.9476	2.37625e-05	0.175541	0.972	0.961	0.496256
Rnase4	3.67279	4.1471	4.67271	3.39781	2.70968	4.31906	2.41562e-05	0.251431	0.757	0.644	0.504478
Snrpb	2.44653	2.15645	2.59084	1.81085	1.72109	2.16024	2.50528e-05	0.234324	0.655	0.532	0.523203
Stom	0.987143	1.30737	1.21294	0.722862	0.895725	0.701017	2.64637e-05	0.275025	0.393	0.276	0.552668
Atf3	1.6629	2.58646	2.53079	4.12438	3.32358	2.71418	2.91478e-05	-0.381423	0.501	0.591	0.608723
Dbp	0.348075	0.184744	0.343346	0.0900562	0.0854053	0.0961668	2.94018e-05	0.237605	0.107	0.041	0.614028
9130401M01Rik	0.246499	0.288789	0.304106	0.188873	0.124775	0.0815007	2.97774e-05	0.189277	0.124	0.051	0.621872
Nxpe5	0.1842	0.133843	0.120337	0.230454	0.555713	0.15627	3.04616e-05	-0.257965	0.058	0.131	0.636161
Atp5md	2.1942	1.7503	1.75322	2.40229	2.47428	2.67639	3.22811e-05	-0.28835	0.575	0.642	0.674159
Ctss	10.3624	12.6857	9.75867	9.65882	13.1657	14.0214	3.30039e-05	-0.19238	0.97	0.961	0.689253
Gtf2i	0.48444	0.447948	0.621081	0.33074	0.291716	0.221388	3.31998e-05	0.245696	0.208	0.115	0.693345
Dgcr6	0.447789	0.409187	0.486155	0.273865	0.228698	0.232601	3.35892e-05	0.222899	0.19	0.1	0.701476
Dock2	2.71693	2.77032	2.68178	3.79241	3.64247	3.50323	3.36805e-05	-0.312581	0.623	0.705	0.703383
Gpr34	1.98703	2.78967	2.53657	1.59615	1.58187	2.14918	3.56959e-05	0.327509	0.569	0.47	0.745472
Dctn6	0.545314	0.398187	0.461793	0.241725	0.335364	0.125281	3.59386e-05	0.224895	0.19	0.1	0.750541
Smdt1	3.80481	3.07547	3.53374	2.92777	2.80309	2.70957	3.72383e-05	0.226258	0.764	0.648	0.777684
Ms4a6b	5.29674	7.72847	7.75878	5.064	5.2896	6.3474	3.83874e-05	0.282822	0.876	0.812	0.801683
Ddit4	0.154661	0.451426	0.401362	0.0160706	0.073209	0.297283	3.96704e-05	0.248806	0.124	0.053	0.828478
Rps11	27.3499	23.6139	27.389	22.0314	23.6256	23.3215	4.00252e-05	0.153532	0.987	0.984	0.835886
Mndal	1.50676	1.84448	1.58689	2.14038	1.97965	2.55313	4.02911e-05	-0.261919	0.445	0.55	0.841439
Grk4	0.200537	0.270862	0.327959	0	0.123027	0.155126	4.09653e-05	0.192131	0.104	0.039	0.85552
Coro1c	1.23269	1.39388	1.00162	0.948726	0.792937	0.723528	4.17044e-05	0.301933	0.4	0.29	0.870954
P3h2	0.653837	0.896518	1.17779	2.22024	1.34241	1.51461	4.18324e-05	-0.422095	0.279	0.378	0.873628
Hist1h1c	1.10844	1.22506	1.49727	1.15475	0.77542	0.600042	4.1869e-05	0.344911	0.319	0.207	0.874392
Aldoa	2.81632	3.57149	2.89059	2.4254	2.2993	2.64467	4.29467e-05	0.265907	0.689	0.622	0.896898
Kdm6b	0.420063	0.487462	0.518706	0.900281	0.754974	0.706891	4.33483e-05	-0.259	0.179	0.28	0.905287
Mrc1	16.8218	17.1157	17.7224	13.8262	15.2579	15.7076	4.46054e-05	0.176078	0.979	0.955	0.93154
Camk1	2.22782	2.61834	2.18855	2.20406	1.72148	1.70875	4.65474e-05	0.259688	0.64	0.523	0.972095
Ccl8	2.08343	2.30685	2.29101	1.80741	10.6262	1.0229	0.017019	-1.10261	0.251	0.301	1
Cxcl2	4.58197	5.25072	4.18359	14.6225	7.72204	7.33982	0.000236645	-0.79622	0.481	0.542	1
Rad51b	1.08101	1.45199	1.42965	2.32545	2.26761	2.20313	5.57812e-05	-0.482193	0.319	0.427	1
Ccl7	5.37886	3.22482	3.20628	4.96899	6.39579	5.10993	0.000469035	-0.464904	0.428	0.515	1
B930036N10Rik	0.956884	0.925108	0.663293	0.989698	1.64283	1.6965	0.000166076	-0.453897	0.256	0.342	1
Gpr65	0.934164	1.00322	0.607135	0.808263	1.67768	1.67083	4.81809e-05	-0.435795	0.281	0.376	1
Ccl12	5.321	2.99677	2.0778	2.47426	5.06805	6.28648	0.0236059	-0.434952	0.367	0.425	1
Auts2	0.480807	0.474239	0.335017	1.29113	0.909557	0.674461	0.00359453	-0.414504	0.124	0.18	1
Vcam1	0.524312	0.935896	0.509083	1.33105	1.00599	1.47196	0.00380927	-0.402019	0.165	0.225	1
Tbc1d4	0.98487	1.1393	1.03985	2.55259	1.45223	1.44472	0.000588555	-0.367502	0.319	0.395	1
Pde3b	1.87089	1.17074	1.35466	2.50831	1.93521	2.17401	0.000218688	-0.35339	0.408	0.483	1
Hmgb2	1.7884	2.24157	2.49635	2.79749	2.89262	3.48274	8.38925e-05	-0.349601	0.504	0.597	1
Lgals3bp	0.876184	1.21419	0.641845	1.30346	1.65996	1.22113	4.7962e-05	-0.347528	0.293	0.389	1
Ddit3	0.297842	0.661171	0.364773	1.12013	0.766926	0.807608	6.46377e-05	-0.342236	0.183	0.272	1
Bcl2a1b	1.1558	1.11711	0.792322	0.636479	1.73737	1.84625	0.00476059	-0.339476	0.302	0.368	1
Lacc1	0.75134	0.724006	0.759715	1.19326	1.06024	1.42315	0.0001467	-0.334805	0.26	0.352	1
Hsp90aa1	3.62001	4.20842	2.90836	6.0222	4.76464	4.154	0.000205172	-0.332521	0.706	0.753	1
Neurl3	0.766239	0.963232	0.975423	1.82486	1.36309	1.19338	4.80477e-05	-0.329887	0.291	0.401	1
Dclre1c	1.58452	1.70911	1.44299	2.89544	2.12778	2.02237	0.000297735	-0.325197	0.478	0.55	1
Casp4	1.11894	1.6081	1.10802	1.57077	1.78771	2.19554	0.000253701	-0.321158	0.412	0.505	1
Trim30a	0.735685	0.965242	0.875008	1.53552	1.21979	1.35104	0.000226974	-0.313898	0.314	0.397	1
Ccl4	2.42855	2.91414	1.12172	3.73242	2.57155	3.14299	0.219868	-0.313418	0.263	0.295	1
Gtf2b	1.07746	0.929277	1.03099	1.12828	1.50508	1.68635	0.000103984	-0.311613	0.321	0.413	1
Cmip	1.03229	1.09398	1.37111	2.31767	1.54684	1.51471	0.00095098	-0.310383	0.393	0.472	1
Atxn7l1	0.673961	0.907582	0.767932	1.7648	1.23432	0.875	0.000701958	-0.310323	0.271	0.358	1
Prkce	0.481571	0.308294	0.457144	0.863752	0.787643	0.604416	0.000235622	-0.309152	0.15	0.229	1
Mt1	17.8451	17.046	16.084	23.3212	21.434	19.4952	0.00187696	-0.303137	0.955	0.955	1
Susd6	1.36417	1.33468	1.2302	2.17482	1.67963	1.91317	6.98724e-05	-0.301258	0.383	0.487	1
Tank	1.8865	2.2227	1.68648	2.6018	2.74641	2.47484	0.00163042	-0.300841	0.509	0.581	1
Rbpj	14.4167	15.3677	14.9525	20.9017	20.3676	14.5094	5.6031e-05	-0.300074	0.937	0.951	1
Rasgef1b	0.736061	0.911362	0.616402	1.01955	1.26612	1.11367	6.16925e-05	-0.299696	0.24	0.341	1
Ubc	3.03458	3.26521	2.89575	5.08922	3.87927	3.57284	0.00167454	-0.297958	0.635	0.693	1
Skil	0.86619	0.993094	0.70785	1.45966	1.34089	1.10593	0.00311756	-0.297085	0.289	0.368	1
Mpeg1	0.566425	0.815345	0.507125	0.667184	1.15197	1.01422	0.00055671	-0.296863	0.202	0.288	1
Mid1	0.420082	0.512024	0.887178	1.11477	0.813412	1.13013	0.00371679	-0.296462	0.22	0.28	1
Fam129a	1.02323	1.01358	0.952096	1.29053	1.69438	1.1612	0.00224925	-0.295487	0.347	0.421	1
Trim25	0.609603	0.480288	0.498212	1.16951	0.755628	0.869252	0.000204677	-0.293937	0.202	0.286	1
G530011O06Rik	0.72295	0.781002	0.929867	1.14949	1.25118	1.20703	0.00157076	-0.292562	0.268	0.342	1
Tle4	1.41217	2.5558	1.7601	2.21161	2.63864	2.8363	0.00026864	-0.292113	0.536	0.626	1
Pim1	0.196206	0.420019	0.363523	0.496502	0.727329	0.561389	0.000125502	-0.290167	0.116	0.196	1
Apobec3	0.686202	0.626041	0.514052	1.02965	1.04723	0.791948	0.000860518	-0.288037	0.218	0.295	1
Polr2a	2.28862	2.90889	1.90454	3.09612	3.02824	3.37767	0.000365272	-0.28739	0.575	0.652	1
Btbd9	1.5829	1.40045	1.31826	2.72958	1.87979	1.62747	0.000277934	-0.286007	0.407	0.503	1
Tmcc3	1.01374	1.94198	1.59416	2.32818	1.99829	2.15093	0.000359113	-0.285676	0.379	0.468	1
Igf1r	0.822407	1.12394	1.04947	1.38306	1.54971	1.31936	9.45857e-05	-0.283936	0.286	0.391	1
Batf	0.380579	0.640682	0.40552	1.09304	0.732457	0.755554	0.0081477	-0.282111	0.17	0.229	1
Ntpcr	1.72039	0.956302	1.26023	1.49719	1.64718	2.1503	0.000429519	-0.281332	0.403	0.483	1
Exoc4	2.16967	2.26628	2.3983	3.48158	3.27104	2.22081	0.00313839	-0.280221	0.56	0.609	1
Kmo	0.123596	0.156133	0.255698	0.467798	0.453323	0.364891	9.10757e-05	-0.277976	0.076	0.147	1
AW112010	0.366228	0.339707	0.277734	0.347153	0.776294	0.503	6.18824e-05	-0.277188	0.112	0.2	1
Hmgn2	0.347557	0.206344	0.352178	0.611522	0.493725	0.665104	0.000401607	-0.276933	0.117	0.192	1
Micu1	0.7842	0.855909	0.767222	1.38052	1.25863	0.941611	0.0105928	-0.273246	0.298	0.354	1
Ppp1r9a	0.703671	0.618903	0.485754	1.07247	0.952474	0.817755	0.00455066	-0.270958	0.208	0.274	1
Rreb1	2.85416	2.48207	2.52671	3.86182	3.46822	2.86441	0.000585468	-0.270758	0.62	0.659	1
Parp8	0.934627	0.562467	0.726993	1.96109	0.918667	0.812367	0.00247488	-0.270138	0.238	0.311	1
Tnrc18	0.513163	0.454383	0.518523	0.570891	0.776019	0.975206	0.000202701	-0.269704	0.202	0.29	1
Tnrc6b	0.683355	0.923138	0.883612	1.22165	1.10996	1.37886	0.000461613	-0.269404	0.319	0.397	1
Gm26740	1.80281	1.63247	1.86425	2.33065	2.50414	2.02606	0.000118254	-0.268253	0.479	0.568	1
Plekho2	1.04954	1.19471	0.937419	1.53067	1.5639	1.34897	0.00117411	-0.267576	0.36	0.448	1
Hexim1	0.736266	1.17268	0.730348	1.44059	1.30933	1.1567	0.000242075	-0.267445	0.293	0.391	1
Polr2l	0.548007	0.53023	0.417066	0.750367	0.783078	0.87107	0.00146944	-0.267047	0.18	0.249	1
Dip2c	1.04446	0.847283	0.909627	1.62347	1.31611	1.13443	0.0290672	-0.266397	0.312	0.354	1
Cxcl1	0.431858	0.496245	0.175179	0.324859	0.55923	0.980103	0.105763	-0.260675	0.112	0.141	1
Errfi1	0.701934	1.05956	1.06807	1.15319	1.62443	0.993401	0.0078201	-0.2584	0.298	0.362	1
Gtdc1	0.904658	0.737619	0.722787	1.20693	0.954	1.3708	0.0280822	-0.257916	0.235	0.284	1
Cd86	4.1202	4.54779	4.61548	6.45718	5.18761	5.42638	0.00180646	-0.257568	0.78	0.798	1
Cebpz	0.429569	0.659343	0.689637	0.771632	0.74458	1.2606	0.00207847	-0.256919	0.228	0.307	1
Lars2	0.588931	0.633309	0.365542	1.41993	0.637742	0.788216	0.0329896	-0.256735	0.195	0.243	1
Nfkbib	0.484056	0.339417	0.396219	0.576343	0.663202	0.748641	0.00108731	-0.256087	0.164	0.237	1
Pdia6	1.48157	1.88837	1.42806	2.42706	2.273	1.71314	0.000307919	-0.256025	0.461	0.556	1
Pag1	0.268167	0.377847	0.213963	0.752311	0.461024	0.54619	0.000277269	-0.255681	0.116	0.19	1
Rab20	0.228354	0.20919	0.21642	0.45886	0.570909	0.262184	0.000540217	-0.255332	0.093	0.159	1
Hspa1b	0.435657	0.564169	0.193875	1.32958	0.699783	0.253499	0.00129013	-0.255318	0.121	0.188	1
Ctnnd2	0.205281	0.234041	0.192269	0.548964	0.420904	0.424178	0.000417373	-0.254896	0.073	0.137	1
Irf7	0.202675	0.193889	0.148544	0.433146	0.477814	0.289847	0.0115825	-0.254858	0.074	0.117	1
Simc1	0.246768	0.304656	0.234005	0.697228	0.387492	0.587476	0.00158755	-0.254812	0.109	0.17	1
Prkg1	0.642365	0.902271	0.520494	1.11993	0.87824	1.21757	0.201514	-0.254623	0.198	0.221	1
C9orf72	0.254474	0.450461	0.333022	0.542625	0.564711	0.738365	0.00341823	-0.254513	0.149	0.211	1
Supt3	0.395761	0.614909	0.78052	0.840379	0.84689	1.052	0.000938382	-0.254097	0.205	0.288	1
Atrnl1	1.13328	0.878599	1.15996	1.60479	1.49492	1.25011	0.0263606	-0.253985	0.336	0.38	1
Hmg20a	0.478452	0.305166	0.325749	0.479985	0.647345	0.681972	0.00212545	-0.253698	0.137	0.204	1
Kansl1	1.57082	1.57297	1.25319	1.80198	2.06623	1.83418	0.00299307	-0.252798	0.426	0.501	1
Dnajb1	0.808271	0.751092	0.929464	1.58363	1.08012	1.07471	0.0223074	-0.252231	0.283	0.329	1
Syk	1.4866	1.51585	1.13604	2.13098	1.874	1.61082	0.0026167	-0.251584	0.448	0.503	1
Fcgr4	0.13468	0.190412	0.0794099	0.219558	0.486133	0.224136	0.000252756	-0.250008	0.051	0.11	1
Upp2	0.282141	0.292409	0.295461	0.563839	0.634012	0.356969	0.0147065	-0.249567	0.112	0.159	1
Cops9	2.00993	1.82612	1.54637	2.4781	2.5078	1.91736	0.000581983	-0.248457	0.526	0.593	1
Tbc1d5	1.43747	2.14854	2.23237	2.62675	2.33353	2.72888	0.0065972	-0.246999	0.504	0.556	1
Trafd1	0.899507	0.923196	0.783728	1.49124	1.19905	1.09183	0.0037936	-0.246948	0.311	0.389	1
Fcgr1	1.416	1.13438	1.14179	1.29051	1.83252	1.52779	0.00366454	-0.245563	0.375	0.448	1
Foxp1	4.1584	3.72118	4.36162	5.72266	4.75152	4.93494	0.000414833	-0.244859	0.762	0.798	1
Pet100	1.1116	1.54613	0.956022	1.63971	1.55513	1.76618	0.002398	-0.244303	0.421	0.491	1
Psmb8	2.02054	1.94063	1.53962	2.63684	2.1687	2.49389	0.00679127	-0.243894	0.509	0.562	1
Lyn	2.9154	3.65956	2.6417	3.39038	4.01482	3.90212	0.00321086	-0.242197	0.701	0.703	1
Phf21a	1.26247	1.09003	1.32205	1.65012	1.55741	1.69839	0.00639579	-0.241006	0.38	0.44	1
Ccr5	0.68269	0.795532	0.650957	0.692512	1.2271	0.912356	0.00751039	-0.240956	0.215	0.28	1
Entpd1	1.37955	1.61085	1.49903	2.11511	1.78432	2.14427	0.00065598	-0.240573	0.451	0.528	1
Oas2	0.553152	0.264336	0.249231	0.580488	0.558361	0.649987	0.00679436	-0.240541	0.132	0.19	1
Sipa1l1	0.557961	0.410975	0.339882	0.8536	0.761725	0.485477	0.00334495	-0.240506	0.169	0.231	1
Slc16a7	0.816563	0.705275	1.04709	1.33687	1.0617	1.28283	0.00514001	-0.240478	0.294	0.366	1
Immp2l	3.87744	3.41419	4.50949	6.52556	4.48799	4.22665	0.0240526	-0.240417	0.615	0.648	1
Trak1	0.719472	0.670865	0.812777	1.03977	1.06474	1.01523	0.0252681	-0.240274	0.26	0.309	1
Slamf9	0.8562	0.952502	0.816372	1.55438	1.24705	0.975963	0.00247834	-0.240199	0.255	0.331	1
Selplg	0.58232	0.453441	0.60743	1.09802	0.771973	0.730157	0.000889238	-0.240169	0.217	0.297	1
Cabyr	0.376768	0.340015	0.269497	0.407536	0.587142	0.635613	0.0262775	-0.239187	0.121	0.162	1
Aig1	0.262013	0.240868	0.373908	0.476597	0.519588	0.551046	0.00419805	-0.238242	0.112	0.168	1
Tmed5	0.741159	0.644953	0.748833	0.896531	1.04398	1.0363	0.089078	-0.238141	0.279	0.309	1
Slirp	0.534433	0.359271	0.663165	0.814787	0.745987	0.809945	0.000170248	-0.237343	0.212	0.303	1
Zcchc7	1.14759	1.42449	1.54696	1.99889	1.74855	1.77744	0.00649587	-0.23722	0.413	0.466	1
Cfp	2.81619	2.80451	2.32262	3.32489	3.51691	2.95726	0.00857751	-0.236487	0.562	0.611	1
Dennd1a	2.82341	2.82194	2.64138	3.8797	3.49954	3.06006	0.00943865	-0.236073	0.676	0.679	1
Fgd2	0.658935	0.465515	0.545763	0.794202	0.984392	0.587535	0.0115794	-0.235214	0.217	0.274	1
Rabgef1	0.415223	0.37644	0.248278	0.608533	0.520796	0.674965	0.000708908	-0.235084	0.136	0.209	1
Nlrp3	0.721334	0.498593	0.548418	0.545845	0.903594	0.985283	0.000605142	-0.234658	0.195	0.282	1
Cd300ld3	0.252379	0.400654	0.142439	0.419405	0.644064	0.314253	0.000312488	-0.234462	0.109	0.184	1
Fcgr2b	4.20352	4.5255	4.80122	3.87263	6.25371	5.24765	0.00152852	-0.233849	0.795	0.83	1
Ppp1r15a	0.729618	1.13518	0.988553	1.48515	1.31224	1.20119	0.00458164	-0.233008	0.306	0.374	1
Atox1	6.93395	5.54737	5.39421	7.68559	7.19594	6.68552	0.000438188	-0.232751	0.863	0.896	1
Cfap299	0.198141	0.278063	0.459494	0.423436	0.677784	0.395819	0.0781391	-0.232559	0.093	0.123	1
Ndel1	0.717209	0.773036	0.799416	0.942345	0.995226	1.27269	0.0115054	-0.231758	0.284	0.339	1
Cox17	1.19178	1.14573	1.01044	1.11289	1.39851	1.84467	0.00309058	-0.230978	0.379	0.452	1
Arhgap31	1.35499	1.09604	1.39555	2.17278	1.7027	1.29182	0.16734	-0.230566	0.41	0.413	1
Stat3	1.64705	1.51464	1.60154	2.42878	1.99626	1.84081	0.0282949	-0.23045	0.486	0.519	1
Nadk	0.757359	0.882816	0.743448	0.832919	1.21267	1.12172	0.0102017	-0.230358	0.293	0.358	1
Klf6	3.11746	3.87291	2.89047	4.69735	3.70988	4.28408	0.0289697	-0.22931	0.679	0.703	1
Gm35154	0.454233	0.374343	0.279291	0.70486	0.543021	0.63724	0.00181846	-0.228729	0.119	0.186	1
Retreg1	0.709558	0.868286	0.481434	1.18616	0.889386	1.02417	0.00871394	-0.228389	0.253	0.311	1
Gm5086	0.48669	0.419053	0.356005	1.07116	0.630115	0.467007	0.0320081	-0.228304	0.157	0.2	1
Srsf7	0.927957	1.03589	1.06426	1.83781	1.29981	1.15265	0.0759767	-0.227413	0.354	0.384	1
Map3k5	0.787068	0.656718	0.839574	1.1567	1.02291	1.03224	0.0044557	-0.225445	0.269	0.337	1
Cpe	0.427456	0.570672	0.484446	0.286613	0.84504	0.891234	0.0521556	-0.225425	0.187	0.229	1
0610040B10Rik	0.107962	0.136426	0.108008	0.354767	0.237534	0.390643	9.20992e-05	-0.225174	0.051	0.114	1
Sdc3	1.02541	0.941391	0.97868	1.51957	1.33151	1.15448	0.00512093	-0.224449	0.321	0.391	1
Cyth1	0.713116	0.77273	0.803509	1.30262	0.906271	1.16144	0.0186	-0.224354	0.278	0.325	1
Psme1	2.14521	1.92355	1.91842	2.48221	2.39347	2.64844	0.00461775	-0.223645	0.555	0.597	1
Baz2b	1.06069	1.23356	1.34903	1.83332	1.54127	1.51635	0.0119572	-0.223013	0.395	0.44	1
Inpp4b	1.08171	0.814901	0.722947	1.57223	1.05726	1.13097	0.0508407	-0.222907	0.276	0.319	1
Ccrl2	0.341843	0.345784	0.20322	0.622478	0.491091	0.487888	0.00314144	-0.221818	0.107	0.166	1
Fto	0.634703	0.441026	0.655467	1.31249	0.748801	0.658408	0.0415846	-0.22093	0.22	0.266	1
Jpt1	2.29407	1.61167	2.06191	2.63471	2.59096	2.11452	0.000223178	-0.2202	0.564	0.624	1
Stat2	0.235579	0.318722	0.178721	0.477184	0.460735	0.43143	0.00734408	-0.220032	0.106	0.159	1
Dock4	1.51126	1.24632	1.15436	2.22038	1.43449	1.72786	0.0135751	-0.219998	0.357	0.432	1
Tec	0.601529	0.673501	0.564749	1.156	0.8016	0.847633	0.0230071	-0.219899	0.245	0.294	1
Hk2	0.298236	0.637716	0.485493	0.727025	0.85032	0.542239	0.029643	-0.219259	0.179	0.227	1
Dpysl3	0.149714	0.227581	0.111896	0.431104	0.471847	0.132621	0.00984872	-0.218417	0.066	0.108	1
Nrg2	0.593915	0.967934	0.832079	1.23884	0.962811	1.25632	0.317134	-0.21811	0.268	0.274	1
Mbnl2	2.52038	2.48964	2.45304	3.63923	2.80261	3.09537	0.0113367	-0.216926	0.613	0.658	1
Cd300c2	1.1373	0.955376	0.699604	0.832045	1.34162	1.33111	0.0334432	-0.216817	0.279	0.333	1
Adar	0.17474	0.196262	0.154649	0.403245	0.423031	0.256196	0.000272084	-0.216579	0.068	0.133	1
Ikzf1	0.939116	0.716316	0.802302	1.1453	1.1883	0.946576	0.0163958	-0.216549	0.294	0.352	1
Dennd4a	1.34887	1.20464	1.29325	2.42722	1.33454	1.65928	0.030398	-0.215687	0.395	0.442	1
Cpne8	0.804851	0.504094	0.528975	1.22341	0.700785	0.894899	0.0145328	-0.215123	0.21	0.266	1
Syngr2	0.747204	0.755743	0.753107	1.47014	0.911174	0.964769	0.0389654	-0.215097	0.286	0.331	1
Rgl1	1.31161	2.22879	1.79037	2.07154	2.5652	1.89881	0.00445789	-0.214786	0.456	0.53	1
Hsp90ab1	9.15564	12.7008	9.27244	15.2802	12.8927	9.82641	8.07368e-05	-0.214713	0.959	0.961	1
Adgre1	5.0409	5.00961	4.20347	5.79962	5.58182	5.78419	0.00412861	-0.21471	0.83	0.84	1
Alcam	0.382068	0.461058	0.227199	0.660921	0.548511	0.584433	0.0993051	-0.214604	0.109	0.139	1
Btk	0.515283	0.571411	0.406319	0.424189	0.826057	0.80276	0.517873	-0.214479	0.207	0.217	1
Lrif1	0.215859	0.29827	0.214918	0.364807	0.368561	0.620016	0.00394808	-0.214473	0.098	0.153	1
Mfhas1	0.794557	0.622066	0.536613	0.897842	0.798743	1.09467	0.0109846	-0.21391	0.24	0.294	1
Kpna4	1.60176	1.70707	1.82317	2.60014	2.15014	1.86215	0.0159437	-0.213748	0.504	0.546	1
Cnpy3	0.692841	0.774525	0.634333	1.24774	0.886885	0.956757	0.0459732	-0.213651	0.268	0.307	1
Tra2b	0.767773	0.848371	0.803347	1.12135	1.13982	1.01876	0.0209191	-0.213602	0.296	0.354	1
Naa38	0.891313	0.777783	0.957964	1.1151	1.4028	0.826903	0.0253081	-0.213544	0.332	0.378	1
Smim27	0.781521	0.800004	0.591828	0.910224	1.04777	0.988898	0.00291107	-0.213221	0.269	0.337	1
Hivep2	1.75377	2.12146	1.55869	2.26525	2.31679	2.23397	0.0152452	-0.213002	0.469	0.526	1
Skap2	2.17386	2.17745	1.63481	2.46301	2.5454	2.38461	0.0149536	-0.212315	0.588	0.62	1
Atp8a1	0.588462	0.526048	0.463121	0.847635	0.830011	0.615721	0.00250296	-0.212028	0.197	0.272	1
Pnp	2.10406	2.07466	2.08857	2.26893	2.75975	2.46968	0.00535713	-0.211579	0.569	0.618	1
Hcls1	1.92	1.90113	1.65376	2.31077	2.42374	2.01472	0.020946	-0.21141	0.544	0.571	1
Ubap2l	1.1767	1.199	1.10804	1.30296	1.68126	1.34291	0.0192878	-0.210761	0.398	0.456	1
Acvrl1	0.285247	0.271175	0.458561	0.379423	0.587582	0.575068	0.00353884	-0.209747	0.147	0.209	1
Arrdc3	0.363664	0.565145	0.402916	0.521247	0.598077	0.905187	0.0037878	-0.209675	0.165	0.231	1
Ston2	0.243495	0.201422	0.210253	0.573173	0.358462	0.383865	0.0122994	-0.209512	0.093	0.137	1
Klf7	0.636058	0.605804	0.562519	0.815799	0.896865	0.798748	0.0344007	-0.209009	0.236	0.284	1
Ier5	1.22144	1.41028	1.47145	1.98624	1.59993	1.82111	0.0146796	-0.208988	0.405	0.464	1
Ndufa3	2.04019	2.54579	1.69212	2.31813	2.60923	2.77825	0.000983848	-0.208968	0.582	0.656	1
Rtf1	0.903594	0.971976	1.03651	1.089	1.34936	1.28282	0.0873232	-0.208895	0.337	0.376	1
Ints6	0.565218	0.730356	0.695956	1.17663	0.90328	0.82114	0.0155622	-0.208833	0.231	0.29	1
Adgre5	0.8109	1.21394	0.738731	1.12871	1.42134	1.02597	0.414335	-0.208403	0.266	0.272	1
Lcp1	5.34444	5.95684	5.04508	6.33859	6.23792	6.97305	0.00951892	-0.208268	0.86	0.869	1
Gpatch2	0.399753	0.229917	0.359131	0.753986	0.528834	0.388263	0.0172747	-0.20795	0.136	0.184	1
Gm10382	0.183975	0.236563	0.194128	0.283922	0.379929	0.481995	0.003053	-0.207313	0.088	0.141	1
Fbxw11	0.521393	0.500981	0.586385	0.769843	0.773761	0.767944	0.0113684	-0.207049	0.21	0.274	1
Sec61g	4.73591	4.95248	4.53679	4.84631	6.22458	5.20047	0.000935508	-0.207025	0.853	0.863	1
Ier3	3.39939	3.41152	3.47461	5.21514	3.96868	3.66183	0.141867	-0.206452	0.605	0.626	1
Zfp36l1	5.10472	6.15812	5.82455	5.75137	6.57121	7.69621	0.0166416	-0.206246	0.812	0.841	1
Pea15a	1.97114	2.22665	2.10246	2.95062	2.67893	2.22202	0.00688529	-0.206157	0.574	0.622	1
Maml3	0.690887	0.754323	1.37013	1.31304	1.12286	1.34322	0.0441861	-0.205941	0.248	0.299	1
Parp14	0.725031	0.421415	0.546649	1.20129	0.70641	0.676948	0.00485336	-0.205619	0.2	0.27	1
Samd4	0.682999	1.07494	0.894207	1.57595	1.07522	1.13509	0.113783	-0.205247	0.286	0.325	1
Ets2	0.553053	0.629799	0.619393	1.14944	0.718998	0.870551	0.00687224	-0.205076	0.21	0.28	1
Sertad1	0.841452	0.802225	0.714851	1.15079	0.852974	1.33006	0.0746758	-0.204958	0.271	0.295	1
Tsc22d4	1.46908	1.63844	1.78348	1.64296	2.28633	1.87523	0.0361754	-0.204956	0.506	0.552	1
Phlda1	0.277702	0.413312	0.333713	0.644101	0.522211	0.544798	0.030333	-0.204877	0.116	0.157	1
Neat1	8.07858	10.715	9.48355	12.4955	10.4308	11.4073	0.00131379	-0.204621	0.914	0.924	1
Rapgef2	1.01118	0.851691	1.00537	1.03638	1.37348	1.16939	0.00190097	-0.204392	0.304	0.382	1
Gm34084	0.416993	0.212786	0.217736	0.258411	0.578322	0.426504	0.000120155	-0.204095	0.091	0.168	1
Blnk	1.05725	1.0064	0.757306	1.182	1.19686	1.33417	0.0318847	-0.203809	0.329	0.37	1
Vmp1	1.82716	1.82402	1.70694	2.18242	2.21614	2.21775	0.00601383	-0.203648	0.471	0.534	1
Ifi213	0.369697	0.310815	0.261729	0.493219	0.500078	0.542346	0.000615254	-0.203638	0.091	0.159	1
Tmem256	3.8578	3.03157	2.98064	3.60652	4.24891	3.56019	0.00040063	-0.203484	0.726	0.781	1
Samsn1	0.326732	0.427861	0.209826	0.416792	0.650266	0.403637	0.0239871	-0.203381	0.119	0.164	1
Maoa	0.434964	0.475378	0.519706	1.01171	0.66909	0.561888	0.00970121	-0.203054	0.193	0.252	1
E230029C05Rik	0.530398	1.07084	0.644515	1.12987	0.957636	1.11006	0.0874245	-0.20233	0.243	0.276	1
Adcy9	0.667812	0.735085	0.515024	0.955697	0.864009	0.897255	0.00876948	-0.202098	0.228	0.295	1
Rbis	0.460097	0.426564	0.440979	0.616904	0.648097	0.697592	0.00529318	-0.201783	0.18	0.241	1
Esr1	0.200221	0.182614	0.269176	0.359427	0.341826	0.510581	0.0454036	-0.201757	0.086	0.119	1
Gab2	3.67457	4.04956	2.85482	4.06697	4.14831	4.48297	0.0047449	-0.20147	0.691	0.712	1
Antxr2	0.782214	0.67347	0.566067	1.10963	1.03666	0.623199	0.0262293	-0.200235	0.246	0.297	1
Snhg8	1.85013	1.55815	1.65989	1.75815	2.03341	2.33853	0.00509054	-0.199729	0.474	0.55	1
Hspa8	9.39519	10.7309	8.63294	13.3586	10.7197	10.7761	0.0006555	-0.199519	0.955	0.967	1
Ier2	1.40841	1.70978	2.06633	2.37782	2.0454	2.13809	0.0070954	-0.199479	0.436	0.503	1
Sptan1	0.587462	0.793359	0.560013	0.815983	0.910949	0.939018	0.0502652	-0.199038	0.246	0.29	1
Glipr1	0.253637	0.36223	0.242438	0.861547	0.337315	0.482113	0.129894	-0.199028	0.104	0.131	1
Ptpre	0.676445	0.839466	0.996714	1.36013	1.03465	1.08554	0.0110586	-0.198904	0.299	0.364	1
Rac2	1.56828	1.51558	1.33626	1.95546	1.95625	1.58537	0.0851882	-0.198847	0.488	0.511	1
mt-Nd5	2.09349	2.16996	2.47446	2.43381	2.96733	2.51067	0.00370518	-0.198733	0.6	0.646	1
Pgghg	0.372175	0.312875	0.334665	0.48111	0.500528	0.622062	0.0167613	-0.198318	0.136	0.186	1
Nabp1	0.52886	0.504644	0.738471	0.567068	0.920158	0.81507	0.00180128	-0.198216	0.2	0.284	1
Hck	0.49292	0.552999	0.639114	0.595714	0.852042	0.81449	0.00430298	-0.1976	0.218	0.286	1
Chd2	1.47632	1.6147	1.36875	2.00977	1.6483	2.10459	0.0482346	-0.197224	0.428	0.46	1
Luc7l3	1.213	0.793701	1.06415	1.07557	1.33004	1.39077	0.00992146	-0.197204	0.339	0.403	1
Ubb	17.5388	11.5905	16.6094	21.769	16.3174	16.2358	4.81239e-05	-0.1967	0.979	0.988	1
Specc1l	0.44623	0.600341	0.502762	0.71675	0.785217	0.696242	0.0789071	-0.196165	0.21	0.245	1
Ifrd1	0.631485	0.690969	0.595056	0.918778	0.852087	0.904533	0.0212226	-0.195841	0.235	0.284	1
Lbh	0.576602	0.537487	0.53858	0.767395	0.844782	0.668531	0.0292649	-0.195784	0.21	0.26	1
2610035D17Rik	0.184216	0.255238	0.379927	0.283264	0.462519	0.556232	0.0134453	-0.194992	0.111	0.159	1
Mpp7	0.259007	0.47449	0.521544	0.712803	0.613219	0.605763	0.00175453	-0.194409	0.14	0.207	1
Rnf19b	0.951424	0.890454	0.756128	1.22741	1.05946	1.19847	0.0444488	-0.194163	0.301	0.341	1
Tmem164	1.14874	0.993119	1.13634	1.79182	1.32445	1.23781	0.0750178	-0.193961	0.355	0.391	1
Ascc3	0.582448	0.741439	0.6834	0.614869	0.971592	1.0097	0.00992188	-0.193938	0.243	0.309	1
Gadd45b	0.5338	0.692248	0.947311	1.09101	1.05461	0.774562	0.0602177	-0.193827	0.25	0.286	1
mt-Nd1	7.75315	9.58733	8.42538	8.55899	11.1816	9.15942	0.00056311	-0.193755	0.944	0.953	1
Ttc28	0.632554	0.691401	0.682181	0.736733	0.967206	0.926397	0.0282545	-0.193667	0.245	0.295	1
Gab1	0.649257	0.375851	0.449882	0.921155	0.697108	0.554743	0.0179243	-0.19363	0.19	0.237	1
Cpq	0.661803	0.551434	0.751186	0.831529	0.9497	0.8153	0.0417294	-0.193517	0.212	0.258	1
Ctbp2	0.171238	0.167617	0.218546	0.353904	0.363499	0.342018	0.00193037	-0.193404	0.081	0.137	1
Enox2	1.31506	1.8957	1.49338	1.72062	2.08151	1.92081	0.0107447	-0.192993	0.435	0.489	1
Cdk19	0.426443	0.377955	0.515679	0.389592	0.718451	0.673442	0.0811699	-0.19278	0.182	0.213	1
Peak1	3.07176	2.36262	2.29899	3.32814	2.89272	3.17651	0.0173886	-0.192394	0.605	0.646	1
Irf1	0.891927	0.945617	0.784408	1.58323	1.04159	1.04572	0.0116977	-0.192291	0.288	0.35	1
Nrros	1.85495	1.5893	1.76053	2.14759	2.04156	2.2032	0.00493353	-0.192109	0.483	0.548	1
Myo9a	0.568385	0.358949	0.552334	1.06558	0.585417	0.643018	0.0286672	-0.191463	0.185	0.235	1
Nfkb2	0.204127	0.403094	0.359218	0.594306	0.584053	0.36406	0.0034151	-0.191085	0.129	0.192	1
Mctp1	10.8027	9.7225	11.0182	14.0934	11.8016	11.3132	0.134442	-0.190839	0.921	0.894	1
Osbpl1a	0.204477	0.138205	0.189046	0.450575	0.324227	0.299788	0.00341265	-0.190825	0.079	0.131	1
Rpl31	4.3484	3.49163	4.27805	5.00469	4.83588	4.32677	0.00628946	-0.190709	0.792	0.82	1
Tap1	0.170008	0.261914	0.136016	0.374965	0.44535	0.222988	0.000579189	-0.190369	0.076	0.139	1
Gbf1	0.522474	0.304419	0.426893	0.646777	0.683255	0.465626	0.0310576	-0.190308	0.154	0.2	1
Foxo3	0.784556	0.708902	0.75796	1.42913	0.993501	0.730464	0.0494144	-0.190306	0.268	0.311	1
Ddx1	0.305757	0.218509	0.266285	0.521657	0.455364	0.358633	0.00288445	-0.190138	0.119	0.18	1
Mvb12b	0.221051	0.269635	0.339322	0.458496	0.551073	0.30654	0.0200716	-0.189984	0.112	0.157	1
Gm46224	0.347978	0.479039	0.378083	0.772837	0.595586	0.51634	0.00554395	-0.189235	0.139	0.198	1
Atp5e	7.62503	6.28305	6.47165	7.16713	8.42557	7.30043	5.62513e-05	-0.189095	0.921	0.892	1
Atp5j2	4.48115	4.32976	4.26377	4.77516	5.33201	4.94065	0.000741358	-0.188948	0.845	0.849	1
Rab11b	1.49482	1.32307	1.43386	2.06553	1.77238	1.51441	0.0584073	-0.188742	0.443	0.491	1
Pitpnc1	2.46528	1.39068	2.38528	3.00118	2.44012	2.14945	0.0107165	-0.18819	0.491	0.54	1
Arih1	1.00291	1.17301	0.942444	1.57555	1.31272	1.21808	0.0495608	-0.187953	0.352	0.399	1
Ptpn6	0.963635	1.15192	0.840253	1.4096	1.16944	1.35175	0.069543	-0.187251	0.349	0.387	1
Dock8	1.23109	1.30611	1.06879	1.97998	1.44397	1.34095	0.00963475	-0.187124	0.374	0.438	1
4833419F23Rik	0.1629	0.198298	0.0973839	0.137896	0.27808	0.481205	0.0126293	-0.18675	0.068	0.108	1
Ciita	0.118114	0.205214	0.207012	0.456278	0.445949	0.109035	0.00103819	-0.18673	0.056	0.11	1
Lpin2	0.667174	0.499409	0.536058	0.953262	0.803914	0.628916	0.125374	-0.186573	0.213	0.243	1
Mob3c	0.386049	0.330286	0.464154	0.759378	0.46054	0.666443	0.00235188	-0.186572	0.149	0.219	1
Ifi203	2.21599	3.00233	2.35647	2.55326	2.91799	3.5561	0.0354154	-0.186162	0.607	0.624	1
Rbm39	3.29425	2.67035	3.25933	3.87809	3.12779	4.19483	0.0108726	-0.18615	0.702	0.732	1
4632427E13Rik	0.341702	0.311775	0.280732	0.438989	0.533805	0.45559	0.0108196	-0.186003	0.121	0.172	1
Wsb1	2.41287	1.94347	2.21644	3.29608	2.46284	2.42015	0.00229743	-0.185423	0.554	0.609	1
Atpif1	5.29565	3.76955	4.4361	5.05011	4.95972	5.64015	0.0014763	-0.18531	0.812	0.857	1
Clec4a3	1.97697	2.1221	2.19516	2.44144	2.64013	2.39654	0.0710022	-0.18512	0.557	0.587	1
Gm26885	0.320381	0.571309	0.279091	0.43312	0.630708	0.633703	0.00365157	-0.185097	0.142	0.207	1
Lpp	1.93208	1.95425	1.7336	2.6517	2.10939	2.29382	0.157805	-0.184683	0.537	0.538	1
Naaa	0.206146	0.24745	0.362353	0.295954	0.559342	0.352595	0.0219837	-0.184022	0.117	0.162	1
Fblim1	0.407937	0.561873	0.390229	0.519694	0.812221	0.500682	0.0682206	-0.183924	0.177	0.215	1
Irf9	0.482389	0.417467	0.417588	0.627292	0.588687	0.703909	0.0016297	-0.183519	0.157	0.229	1
Ing4	0.568937	0.564728	0.512405	0.755327	0.79423	0.705427	0.159813	-0.183163	0.225	0.249	1
Peli2	0.324364	0.360279	0.392285	0.50013	0.476951	0.67578	0.0692591	-0.183096	0.155	0.19	1
Man2a1	2.25136	2.16823	2.48914	1.92268	2.5369	3.56221	0.298978	-0.18295	0.58	0.585	1
Ppard	0.227899	0.26199	0.263126	0.398076	0.425784	0.427773	0.00108744	-0.182775	0.093	0.159	1
Rab43	0.695653	0.880608	0.625061	1.13294	0.975162	0.888249	0.0213999	-0.182279	0.263	0.313	1
Mmp9	0.969657	0.567894	1.09933	1.35638	1.14502	0.902574	0.0463282	-0.182226	0.155	0.198	1
Ptpn2	0.260905	0.27469	0.301384	0.337243	0.383558	0.627225	0.00635206	-0.182052	0.107	0.162	1
Ccnl1	1.13901	1.25145	0.959205	1.55921	1.28297	1.52054	0.013762	-0.181982	0.336	0.397	1
Tcf7l2	0.47232	0.594447	0.565324	0.517955	0.7539	0.901392	0.0266935	-0.181106	0.195	0.247	1
Tmem176b	8.51175	7.33924	7.09272	10.1473	8.47021	8.39678	0.00564726	-0.18081	0.893	0.898	1
Mrps15	0.592985	0.665248	0.464483	0.871275	0.841845	0.655319	0.0834565	-0.17985	0.238	0.272	1
5033421B08Rik	1.00945	1.36736	0.755802	1.61854	1.15475	1.45851	0.0439488	-0.179766	0.329	0.38	1
Pdia3	2.67926	3.1578	2.78752	3.75751	3.56558	2.95594	0.0344657	-0.179551	0.686	0.706	1
Ebi3	0.19281	0.293188	0.247424	0.466164	0.401832	0.400095	0.00428775	-0.179392	0.099	0.155	1
Bicral	0.360226	0.508155	0.519342	0.738676	0.701496	0.54962	0.0531323	-0.179204	0.193	0.235	1
Epsti1	2.05346	1.96391	2.42463	3.23421	2.2847	2.56391	0.0232282	-0.178946	0.547	0.591	1
Tnfaip3	0.273733	0.431828	0.2046	0.358683	0.539378	0.473907	0.00602351	-0.178814	0.111	0.164	1
Klf10	1.04832	1.12474	1.02122	1.47067	1.38652	1.19101	0.0382083	-0.17864	0.322	0.372	1
Pold4	0.705735	0.998292	0.935259	1.00383	1.18292	1.15027	0.0392667	-0.178586	0.293	0.346	1
Bcor	0.668834	0.424439	0.528283	0.984784	0.660652	0.695957	0.0147691	-0.178531	0.19	0.249	1
Irak2	0.514901	0.580529	0.495213	0.696781	0.766387	0.709676	0.026507	-0.178491	0.197	0.249	1
Zfp704	0.637194	0.616927	0.620642	0.881756	0.773787	0.91363	0.0973204	-0.178424	0.23	0.264	1
Il10ra	1.09623	0.976299	0.677995	1.22176	0.940936	1.50099	0.0135395	-0.178269	0.291	0.354	1
Akap13	2.23904	2.8576	2.13605	3.05666	2.94761	2.70027	0.026044	-0.177549	0.626	0.656	1
P4ha1	0.601051	0.974628	0.724107	0.99739	0.92093	1.17476	0.112177	-0.177461	0.283	0.317	1
Hdac1	0.492451	0.444908	0.336106	0.517694	0.534825	0.788535	0.028361	-0.177431	0.174	0.223	1
Sec62	1.57112	1.65375	1.45134	1.49523	1.96184	2.04594	0.0347365	-0.177356	0.491	0.528	1
Dnajc1	0.708312	0.775512	0.648615	0.991235	1.007	0.796177	0.0455167	-0.176605	0.268	0.307	1
Pnrc1	1.56486	1.90454	2.04103	2.39473	2.09544	2.29828	0.0190224	-0.176562	0.536	0.589	1
March3	0.84651	0.579864	0.675067	1.13505	0.792099	0.962706	0.218086	-0.176257	0.228	0.252	1
Ppp1r11	1.0072	1.33374	1.31865	1.51752	1.46788	1.60206	0.107013	-0.175889	0.417	0.432	1
Btaf1	1.15004	0.857289	0.766713	1.50831	1.07315	1.10381	0.0193462	-0.175791	0.314	0.37	1
Mcl1	3.76921	3.73231	3.41517	4.25926	4.41277	3.95959	0.0136387	-0.175204	0.734	0.783	1
Ndufc1	1.5139	1.56481	1.35888	1.39454	1.84834	1.9825	0.028981	-0.175091	0.484	0.511	1
Cstf3	0.412959	0.301053	0.391718	0.63006	0.478584	0.582038	0.0119838	-0.175019	0.144	0.2	1
Ly86	1.59343	1.86501	1.76494	1.80177	2.17843	2.17429	0.0102559	-0.174963	0.468	0.526	1
Psmb10	1.0385	0.670162	1.04194	0.922089	1.18538	1.21633	0.0289082	-0.174906	0.339	0.387	1
Samd9l	0.921799	0.869772	0.773946	1.19567	0.908513	1.32685	0.0218481	-0.174896	0.288	0.35	1
Rtp4	0.602838	0.198209	0.288739	0.396155	0.368228	0.846882	0.00505325	-0.174891	0.119	0.18	1
Add1	0.709985	0.620129	0.70892	0.761786	0.933518	0.901661	0.043181	-0.1744	0.26	0.305	1
Zup1	0.383099	0.401373	0.34675	0.61039	0.549151	0.531776	0.012146	-0.17421	0.142	0.198	1
2810013P06Rik	0.605647	0.851041	0.804169	1.34204	0.890605	0.924784	0.0722178	-0.17349	0.256	0.299	1
Ifi211	0.253718	0.49036	0.288846	0.491269	0.559172	0.499102	0.039049	-0.173391	0.136	0.178	1
Siglec1	0.231358	0.316613	0.218952	0.397985	0.468311	0.356041	0.00367837	-0.17265	0.101	0.159	1
A330023F24Rik	0.208567	0.392202	0.252523	0.280209	0.464922	0.549358	0.0112641	-0.172589	0.111	0.162	1
Faf2	0.305006	0.291163	0.257487	0.656652	0.394974	0.403252	0.00932449	-0.171975	0.119	0.17	1
AC149090.1	1.90473	3.51487	2.1151	2.87974	3.44827	2.46964	0.026784	-0.171703	0.592	0.654	1
Gm14963	0.353252	0.349603	0.204607	0.28521	0.41791	0.662393	0.0340724	-0.171657	0.119	0.162	1
Nfe2l2	2.84636	2.87927	2.12952	3.18962	3.10432	3.00242	0.0212859	-0.171586	0.63	0.663	1
Actg1	12.5031	8.33803	10.1091	12.2692	11.039	11.9865	0.0359773	-0.171184	0.937	0.928	1
Ubxn2a	0.066098	0.194995	0.213731	0.250663	0.375028	0.236025	0.00989996	-0.17066	0.069	0.114	1
Atp7a	0.513048	0.614559	0.402071	0.655145	0.834522	0.532754	0.0180145	-0.17027	0.182	0.239	1
Tmem258	2.08964	1.8635	1.50283	2.02783	2.21802	2.17819	0.013721	-0.170151	0.532	0.591	1
Ppfibp2	0.199084	0.22932	0.144365	0.313573	0.325196	0.386891	0.0117776	-0.170032	0.084	0.129	1
Ppm1h	1.05601	1.13794	0.927612	1.3076	1.4384	1.08091	0.120532	-0.16981	0.347	0.38	1
Nckap1l	1.1266	1.46946	1.29204	1.73263	1.65877	1.41738	0.0331572	-0.1696	0.428	0.479	1
A530072M11Rik	0.1634	0.360521	0.12882	0.399098	0.374113	0.377614	0.000494663	-0.169505	0.086	0.153	1
Lilra5	0.80131	1.00053	1.1001	1.34561	1.10771	1.3144	0.0118874	-0.169305	0.299	0.37	1
Cox6c	5.54576	4.59248	4.6167	4.83853	6.01003	5.47618	0.00795301	-0.169025	0.848	0.857	1
Ssbp2	0.336613	0.303097	0.355537	0.590387	0.492215	0.44233	0.00119909	-0.168981	0.119	0.188	1
Acsl3	0.301272	0.151582	0.100311	0.246538	0.401048	0.258373	0.000392185	-0.168814	0.066	0.129	1
Ccng1	0.344475	0.375669	0.232889	0.410613	0.384276	0.68762	0.0499085	-0.168453	0.129	0.168	1
Vsir	2.26573	2.11327	2.30993	2.83026	2.5154	2.66226	0.0155473	-0.168439	0.608	0.648	1
Slc16a10	0.917773	0.499614	0.554487	0.960966	0.922761	0.65811	0.0325602	-0.168437	0.22	0.268	1
Znfx1	0.278857	0.292131	0.228927	0.302742	0.474767	0.418218	0.0267586	-0.167859	0.119	0.162	1
Impact	0.686686	0.563667	0.658882	0.587704	0.782423	1.05957	0.0759353	-0.167629	0.25	0.284	1
Rnd3	0.209491	0.309563	0.169852	0.335443	0.396876	0.400522	0.0575823	-0.167109	0.099	0.133	1
4833445I07Rik	0.358304	0.218238	0.425489	0.575915	0.433886	0.525792	0.0129817	-0.167083	0.114	0.164	1
Ccl2	4.06909	2.26556	2.58843	1.86111	2.95178	5.02448	0.229763	-0.16677	0.479	0.511	1
Nagpa	0.238549	0.262054	0.207365	0.332346	0.413968	0.383894	0.00100108	-0.16668	0.106	0.174	1
Casc3	0.327587	0.433656	0.20487	0.573277	0.499765	0.426499	0.0252649	-0.166173	0.131	0.178	1
Mtf2	0.167111	0.119724	0.129519	0.218235	0.281063	0.302992	0.0383161	-0.166168	0.068	0.1	1
Clcc1	0.26723	0.514908	0.36157	0.731781	0.534905	0.498509	0.0206291	-0.166161	0.164	0.213	1
Pdlim4	0.470294	0.554582	0.629355	0.893453	0.794205	0.568461	0.0623189	-0.166042	0.226	0.264	1
Dapp1	0.621694	0.389074	0.568181	0.678005	0.705516	0.708324	0.0164725	-0.165715	0.185	0.241	1
Pik3cd	0.62729	0.51609	0.478076	0.789924	0.808722	0.551862	0.0465058	-0.16569	0.21	0.252	1
Nfkbia	1.83396	1.99159	2.04991	2.74626	1.88751	2.75778	0.673685	-0.16567	0.522	0.493	1
Phf11b	0.220466	0.271879	0.198749	0.545497	0.306271	0.405825	0.0578931	-0.165477	0.099	0.133	1
Aimp1	0.63642	0.530203	0.577456	0.564725	0.828072	0.798689	0.0413357	-0.165285	0.228	0.274	1
Actr3	3.33263	3.40513	2.87575	2.75087	3.92662	3.99797	0.0358324	-0.165251	0.701	0.732	1
Aff1	0.704387	0.689685	0.94188	1.08485	0.837645	1.17327	0.228634	-0.165039	0.289	0.311	1
Dzip3	0.153974	0.114433	0.107605	0.386957	0.232582	0.22733	0.00095857	-0.164783	0.055	0.108	1
Map2k6	0.144853	0.256107	0.261956	0.253105	0.430483	0.351916	0.0742566	-0.164522	0.094	0.125	1
Icam1	0.393948	0.55925	0.514689	0.934553	0.625731	0.596343	0.0856198	-0.164113	0.165	0.204	1
St13	2.15995	2.58963	1.82651	2.55401	2.78452	2.34355	0.0274974	-0.163708	0.603	0.63	1
C4b	2.72948	1.86979	3.29746	2.32221	3.56182	2.56977	0.293517	-0.163639	0.499	0.497	1
Psmd1	0.667555	0.509964	0.52254	0.636148	0.852774	0.652858	0.0344909	-0.163512	0.226	0.276	1
Utrn	0.5182	0.843629	0.604902	1.04785	0.892625	0.722384	0.0584407	-0.163085	0.223	0.274	1
Etv3	0.212844	0.277807	0.166176	0.455328	0.376915	0.302676	0.0376295	-0.162764	0.099	0.137	1
Dguok	0.803958	0.87418	0.815868	0.926215	1.08105	1.08622	0.068615	-0.162669	0.298	0.342	1
Lair1	0.917964	1.11448	0.891292	1.14302	1.36498	1.03765	0.0278269	-0.162495	0.326	0.387	1
Sgpl1	1.74316	1.56699	1.15665	1.77036	1.72748	1.88855	0.0342064	-0.162439	0.451	0.511	1
AW554918	0.365714	0.425732	0.574063	0.460094	0.661458	0.677548	0.235583	-0.162426	0.175	0.2	1
Tial1	0.461792	0.437429	0.474175	0.714111	0.610515	0.609663	0.151	-0.162269	0.182	0.211	1
Isg15	0.141793	0.378036	0.221562	0.506245	0.394079	0.364785	0.113871	-0.162205	0.076	0.102	1
Zfp451	0.248248	0.26195	0.279205	0.39129	0.330714	0.558342	0.0658586	-0.162049	0.116	0.153	1
Sdccag8	0.336803	0.370386	0.350331	0.789144	0.440634	0.465228	0.0200938	-0.161785	0.139	0.188	1
Parp12	0.234105	0.289124	0.337588	0.524413	0.466255	0.349631	0.066019	-0.161781	0.124	0.16	1
Bod1l	0.414874	0.81632	0.675538	0.943139	0.789215	0.87615	0.0519511	-0.161683	0.251	0.297	1
Itga4	0.616706	0.694555	0.3419	0.821045	0.795605	0.612475	0.0362165	-0.161486	0.215	0.264	1
Mesd	0.416125	0.593161	0.519676	0.585351	0.667212	0.806797	0.113203	-0.161177	0.212	0.245	1
Clec2d	1.34579	0.865673	0.737634	1.23352	1.19618	1.19412	0.0227121	-0.160988	0.304	0.362	1
Pstpip2	0.435377	0.540981	0.552807	1.29764	0.640222	0.404288	0.0923038	-0.160767	0.193	0.231	1
Epb41l2	1.17873	1.19035	0.885996	1.25717	1.26698	1.49298	0.0557266	-0.16064	0.352	0.405	1
Chd3	0.340594	0.377117	0.444889	0.72651	0.511533	0.507283	0.00566171	-0.160524	0.154	0.215	1
Bst2	2.93048	2.52038	2.4323	2.92035	3.02685	3.13594	0.262351	-0.160112	0.615	0.609	1
Gm20492	0.156459	0.111207	0.111705	0.122545	0.288906	0.287563	0.00243182	-0.159883	0.056	0.104	1
Supt6	0.482953	0.45261	0.323429	0.448038	0.721153	0.457716	0.0171434	-0.159664	0.165	0.221	1
Fnbp1	2.98994	2.52244	1.91253	3.28506	2.91486	2.56034	0.0383743	-0.159233	0.602	0.638	1
Stap1	0.347496	0.766339	0.256551	0.527278	0.494725	0.968711	0.123124	-0.159176	0.15	0.182	1
Rrbp1	3.96553	4.64403	3.9925	5.30758	5.20389	3.9818	0.0490938	-0.159122	0.795	0.798	1
H3f3b	19.397	19.2365	21.6992	21.6666	20.9362	25.5629	0.0162422	-0.158867	0.982	0.982	1
Myo1f	1.07518	1.23963	0.744973	1.57767	1.29783	1.0347	0.0510381	-0.158815	0.34	0.384	1
U2surp	0.590322	0.759212	0.642332	0.944034	0.822619	0.885082	0.122154	-0.158775	0.256	0.292	1
Itga6	0.192427	0.18618	0.184634	0.308313	0.325588	0.333685	0.0197642	-0.157802	0.078	0.117	1
Gripap1	0.356366	0.542075	0.476842	0.640388	0.567239	0.735889	0.115542	-0.157355	0.193	0.227	1
Zmynd11	0.658627	0.621454	0.708325	1.09844	0.723049	0.904527	0.072255	-0.156867	0.251	0.29	1
Plek	3.91079	4.33351	3.98531	4.88276	4.62432	4.64394	0.0145506	-0.156809	0.779	0.787	1
Lncpint	0.980261	1.22604	1.03642	1.41293	1.3012	1.32955	0.116101	-0.15679	0.357	0.395	1
Dusp16	0.939729	1.02619	0.840211	1.34792	1.19238	1.00458	0.0806504	-0.15652	0.304	0.342	1
Id2	0.373423	0.727375	0.363997	0.706352	0.674332	0.66215	0.120231	-0.156355	0.155	0.19	1
Ophn1	2.89982	2.64919	2.65022	3.16812	3.21342	3.04347	0.1682	-0.156303	0.64	0.654	1
Srek1ip1	0.315809	0.466582	0.327867	0.416773	0.495748	0.666257	0.00824096	-0.156194	0.15	0.211	1
Dnaja1	2.17927	1.92314	1.80105	3.21494	1.99326	2.23293	0.315349	-0.156147	0.549	0.542	1
Phf11d	0.141576	0.153124	0.127927	0.26913	0.317923	0.200785	0.0166413	-0.156032	0.061	0.1	1
Ttc39b	0.46659	0.359563	0.366738	0.918532	0.492742	0.428441	0.0851561	-0.155997	0.169	0.202	1
Sik3	0.784776	0.714873	0.832326	1.3237	0.878496	0.919707	0.386738	-0.15593	0.264	0.276	1
Casp8	0.794029	0.734124	0.773869	0.979114	1.09172	0.75821	0.0856902	-0.155599	0.291	0.329	1
Ifnar2	2.10852	1.76018	2.06371	2.18545	2.37234	2.25355	0.0860117	-0.155566	0.56	0.577	1
Gna12	1.48666	1.30625	1.17175	2.00319	1.37228	1.65721	0.0242367	-0.155245	0.423	0.483	1
Slc9a1	0.233545	0.273381	0.315914	0.31812	0.421491	0.47651	0.113003	-0.154588	0.126	0.155	1
Zfp608	0.301376	0.323895	0.277593	0.508828	0.498956	0.33467	0.0154126	-0.15437	0.106	0.155	1
9530062K07Rik	0.351195	0.37241	0.310422	0.404705	0.44183	0.643911	0.109323	-0.15418	0.134	0.166	1
Isy1	0.264156	0.179317	0.223255	0.277981	0.457102	0.244327	0.0562062	-0.154173	0.094	0.129	1
Tmem50b	0.240871	0.18346	0.1995	0.508924	0.358182	0.214441	0.0112259	-0.153997	0.086	0.133	1
Mtif2	0.126689	0.167752	0.161182	0.466689	0.277944	0.17977	0.0324708	-0.153871	0.071	0.106	1
Anks1	0.775954	0.939428	0.768734	1.42588	0.895836	1.04164	0.170774	-0.153861	0.306	0.329	1
Nsun6	0.540604	0.545398	0.544569	0.597527	0.780396	0.687944	0.180121	-0.15329	0.198	0.227	1
Ier3ip1	1.23031	1.27145	1.36249	1.58863	1.458	1.65435	0.0116472	-0.15314	0.423	0.487	1
Slc1a5	0.204059	0.149311	0.185585	0.312828	0.255996	0.391421	0.0500565	-0.153015	0.079	0.112	1
Pdxdc1	0.367947	0.46347	0.329138	0.667052	0.570644	0.437684	0.182999	-0.152892	0.169	0.192	1
Bcat2	0.215114	0.249072	0.150248	0.399799	0.351785	0.292134	0.171593	-0.152869	0.099	0.121	1
Myd88	0.337657	0.284678	0.274304	0.619081	0.422652	0.366576	0.0503401	-0.152836	0.126	0.164	1
Rnf34	0.481336	0.360433	0.491878	0.563423	0.534439	0.723635	0.131489	-0.15233	0.185	0.211	1
Atp11c	0.682465	0.590038	0.636267	0.908441	0.79522	0.787374	0.301521	-0.15208	0.233	0.25	1
Ssh2	2.83273	3.84785	2.3164	2.57754	3.64008	3.84306	0.0623247	-0.151824	0.638	0.656	1
Ccnyl1	0.240481	0.315687	0.258135	0.538432	0.19848	0.686449	0.0480383	-0.151596	0.098	0.135	1
Vti1a	1.08735	0.948752	1.12553	1.42029	1.12435	1.42229	0.176062	-0.151554	0.321	0.348	1
Rpl23a	3.53487	3.83815	3.20715	4.0748	4.42291	3.43827	0.0138644	-0.151545	0.737	0.757	1
Taf13	0.843124	0.637298	0.902687	1.13341	0.966417	0.913878	0.260451	-0.151423	0.281	0.299	1
Brd2	1.15154	1.04498	0.990835	1.58045	1.19958	1.2507	0.222821	-0.151415	0.359	0.38	1
Rps17	5.00049	4.73234	4.67408	5.14349	5.81099	5.0072	0.00881069	-0.150628	0.848	0.855	1
Pmaip1	0.193248	0.23011	0.28215	0.32702	0.396783	0.358337	0.0160473	-0.150591	0.089	0.135	1
Smarca2	0.679521	0.554251	0.599609	0.976949	0.692577	0.809785	0.122743	-0.150493	0.236	0.27	1
Ankrd44	1.74372	1.70273	1.7206	2.5119	1.82264	2.03444	0.135126	-0.150405	0.501	0.526	1
Gm37233	0.137251	0.125753	0.172509	0.284778	0.288723	0.229911	0.00415133	-0.150056	0.061	0.108	1
Fars2	0.403241	0.545688	0.563961	0.713115	0.667649	0.659234	0.0854003	-0.149946	0.205	0.245	1
Il4ra	0.821937	0.504343	0.946946	0.712197	1.02223	0.923135	0.147773	-0.14994	0.266	0.294	1
Rbks	0.364519	0.213904	0.323505	0.454311	0.511094	0.304652	0.18232	-0.149418	0.112	0.137	1
Ptpn1	1.2781	1.68332	1.54814	2.38989	1.71203	1.55292	0.0897536	-0.148659	0.474	0.497	1
Ankrd11	2.06946	2.09407	2.03426	3.06282	2.30548	2.14977	0.149542	-0.148656	0.547	0.562	1
Lgals9	0.773298	0.748755	0.629644	0.91672	0.924306	0.864776	0.153802	-0.148323	0.283	0.301	1
Lilrb4a	2.024	2.68889	2.14331	2.63949	2.53184	2.91539	0.0188838	-0.148256	0.569	0.628	1
Dpm3	2.2347	2.10876	2.12992	2.93376	2.51274	2.20034	0.00694283	-0.148227	0.598	0.646	1
Pgrmc1	0.636205	0.456393	0.722146	0.704686	0.788649	0.773599	0.215514	-0.148054	0.233	0.25	1
Alpk1	0.317456	0.299318	0.273452	0.38577	0.415325	0.501251	0.0134861	-0.147996	0.116	0.164	1
Acadm	0.671719	0.487513	0.581159	0.903747	0.707176	0.70177	0.0512574	-0.147789	0.221	0.268	1
Mrpl52	2.27894	1.57287	1.95726	1.80462	2.20073	2.50703	0.137188	-0.147151	0.555	0.568	1
Nrp1	2.61437	2.46114	2.52292	2.54258	3.28666	2.51664	0.155227	-0.146546	0.625	0.626	1
Cwf19l2	0.475968	0.669407	0.393033	0.642941	0.54954	0.92603	0.0212876	-0.146219	0.188	0.247	1
Rasgrp4	0.614941	0.538724	0.518373	0.931176	0.774595	0.508924	0.0513031	-0.146179	0.213	0.264	1
Rptor	0.360428	0.366284	0.177701	0.643509	0.464676	0.287757	0.270911	-0.145964	0.139	0.159	1
Ppp2r3d	0.138711	0.278607	0.204731	0.4457	0.277412	0.381009	0.0150685	-0.145912	0.086	0.131	1
Auh	0.189914	0.223388	0.200901	0.230723	0.42139	0.259182	0.0797408	-0.145863	0.093	0.123	1
Bcl3	0.232464	0.315869	0.292538	0.471973	0.459282	0.32478	0.0900642	-0.145718	0.116	0.147	1
Ppp3ca	4.2031	4.54754	4.82466	5.68866	5.05645	4.87504	0.0532069	-0.145712	0.783	0.812	1
Man1a	2.51859	2.36513	1.72567	2.88941	2.68011	2.13245	0.112019	-0.145679	0.572	0.599	1
Acp2	0.552055	0.596154	0.49291	0.851639	0.76267	0.554976	0.129975	-0.145655	0.223	0.25	1
Pld1	0.179543	0.144196	0.265647	0.494337	0.267708	0.298542	0.0596811	-0.145598	0.083	0.115	1
Trim14	0.240107	0.14619	0.260574	0.326558	0.352911	0.326625	0.0174466	-0.145583	0.089	0.133	1
Btbd1	0.474003	0.576458	0.748747	0.782563	0.861727	0.615551	0.0880016	-0.14498	0.235	0.266	1
Fam172a	2.06072	1.62051	1.94781	2.00554	2.08146	2.37835	0.462781	-0.144882	0.506	0.524	1
Zkscan3	0.367238	0.333322	0.344144	0.547686	0.475845	0.474385	0.0317883	-0.144583	0.132	0.178	1
Rbbp8	0.44803	0.599673	0.56935	0.863849	0.67368	0.663834	0.0244717	-0.144411	0.202	0.254	1
Ccnd1	1.59864	1.39691	0.929777	1.11983	1.68176	1.60788	0.0447761	-0.144393	0.324	0.378	1
Tmco1	1.27771	1.99476	1.86607	1.8852	2.15332	1.90324	0.0191514	-0.14402	0.514	0.558	1
Ifi204	1.17267	1.2502	1.22861	1.10318	1.44822	1.6723	0.0664058	-0.144008	0.385	0.436	1
Csf3r	0.226745	0.198284	0.192668	0.436593	0.330244	0.269286	0.0832766	-0.14373	0.088	0.115	1
Sdf2l1	0.774422	1.08641	0.92321	0.767969	1.30321	1.11607	0.0590515	-0.143601	0.321	0.372	1
Pdcd2l	0.645115	0.516189	0.542927	0.539905	0.778164	0.758076	0.161207	-0.142994	0.226	0.252	1
Hnrnpc	0.98809	1.69154	1.47772	1.87249	1.6055	1.62219	0.0581073	-0.142827	0.451	0.495	1
Rpl34	24.0959	21.3789	25.16	24.2867	26.8012	25.5898	0.000435753	-0.142706	0.988	0.992	1
Csf2ra	1.74054	1.61938	1.79219	2.09086	1.91117	2.06281	0.123131	-0.142567	0.488	0.517	1
Slc29a3	0.513784	0.427979	0.349097	0.766526	0.576402	0.463563	0.0290045	-0.142557	0.17	0.219	1
Ildr1	0.359561	0.321519	0.231168	0.328303	0.504736	0.403811	0.094021	-0.142544	0.107	0.141	1
Bsg	2.33544	2.23593	2.27833	2.97013	2.34176	2.84931	0.00720624	-0.142472	0.6	0.675	1
Cspp1	0.290942	0.483732	0.216695	0.459317	0.502018	0.454159	0.0703647	-0.14207	0.14	0.178	1
4930402H24Rik	0.180658	0.220908	0.178485	0.221586	0.270215	0.455081	0.0476925	-0.142048	0.084	0.119	1
Nub1	0.313397	0.549257	0.398842	0.523026	0.637056	0.516891	0.0302318	-0.141956	0.17	0.219	1
March5	0.478883	0.387522	0.38635	0.679661	0.564342	0.483505	0.0298147	-0.141817	0.167	0.215	1
Tbc1d9	0.476377	0.374454	0.39101	0.924775	0.455063	0.492845	0.0900833	-0.141621	0.162	0.198	1
Gm12979	0.46071	0.419505	0.429415	0.496102	0.47162	0.812948	0.0860929	-0.141608	0.164	0.202	1
Ppp1r10	1.72996	1.90353	1.92205	2.04337	2.10353	2.2932	0.0325894	-0.141567	0.502	0.552	1
Mlec	0.672398	0.497334	0.42206	0.758527	0.593376	0.781151	0.128441	-0.141467	0.208	0.241	1
Gls	1.48733	1.74792	1.84153	2.57418	1.90093	1.73565	0.226171	-0.141445	0.488	0.503	1
B2m	10.4111	10.8716	9.38085	6.29648	12.4809	12.8282	0.00350142	-0.141376	0.957	0.957	1
Rps12	19.962	20.6824	22.4657	25.647	25.1805	18.8925	0.00032014	-0.141279	0.982	0.98	1
Ptprc	2.58908	2.84146	2.60298	2.93684	3.33337	2.72781	0.0484119	-0.141248	0.65	0.697	1
Itgb5	1.35975	1.47318	1.34269	1.53053	1.56246	1.84023	0.0352534	-0.141003	0.415	0.477	1
4933433G15Rik	0.486396	0.350309	0.480418	0.481003	0.497202	0.771091	0.21751	-0.140802	0.169	0.194	1
Anp32e	0.74944	0.584952	0.503832	0.710231	0.815008	0.746647	0.317415	-0.140763	0.231	0.249	1
Arap1	1.2204	0.925864	0.91644	1.2753	1.08379	1.39618	0.0449637	-0.140637	0.327	0.38	1
Sdhaf2	0.23352	0.251195	0.156585	0.223813	0.381834	0.343462	0.0139196	-0.140294	0.093	0.137	1
Grb2	1.94702	1.80393	2.06705	2.2259	2.27326	2.16377	0.151751	-0.14006	0.564	0.575	1
Fndc3a	1.53347	1.80001	1.64637	2.47568	1.97368	1.56917	0.22271	-0.139909	0.498	0.511	1
Fmnl2	0.722224	0.459531	0.712671	0.875108	0.836957	0.646475	0.323306	-0.1398	0.213	0.231	1
Kifap3	0.309587	0.305287	0.210141	0.404354	0.487864	0.276435	0.238679	-0.139508	0.124	0.145	1
Zfp407	0.689486	0.681422	0.525367	1.09848	0.703699	0.771861	0.499874	-0.139505	0.236	0.249	1
Atxn1	1.21837	1.06289	1.21134	1.80373	1.50887	0.905713	0.102146	-0.139315	0.342	0.387	1
Peli1	0.877847	0.91454	0.757423	0.890112	1.02978	1.15016	0.0800938	-0.139136	0.299	0.339	1
Trim12a	0.432856	0.30802	0.288887	0.499318	0.496549	0.426849	0.163046	-0.139075	0.14	0.166	1
Cbx1	0.6239	0.71099	0.60373	0.946587	0.760898	0.82889	0.183461	-0.139062	0.256	0.286	1
Egr2	0.590174	0.926635	1.00532	0.982333	0.931552	1.23753	0.0744451	-0.138948	0.276	0.317	1
Ankhd1	0.843417	1.17243	0.850835	1.45171	0.939037	1.36432	0.128518	-0.138943	0.337	0.37	1
Azin1	0.672831	0.451921	0.559432	0.641768	0.727321	0.721758	0.181843	-0.138345	0.208	0.235	1
Arhgap25	0.361946	0.455784	0.207663	0.361387	0.42864	0.645101	0.140361	-0.138066	0.134	0.164	1
2810454H06Rik	0.252761	0.269331	0.280494	0.389627	0.358807	0.455984	0.0505163	-0.137935	0.104	0.141	1
Asap1	1.14658	1.04509	1.05387	1.2911	1.29153	1.27682	0.535152	-0.137756	0.365	0.37	1
Ufsp2	0.345955	0.273804	0.273005	0.359487	0.42605	0.4631	0.0259381	-0.13761	0.121	0.164	1
Rabgap1l	0.852425	0.690614	0.77028	0.849023	1.01227	0.883979	0.610352	-0.137238	0.243	0.25	1
Taf3	0.288835	0.390299	0.326559	0.562465	0.467918	0.426391	0.125091	-0.137171	0.14	0.17	1
Morf4l2	0.842545	1.01156	0.781671	1.22622	0.961477	1.16458	0.337191	-0.137168	0.309	0.331	1
Mrtfb	0.202072	0.225864	0.178512	0.305446	0.273725	0.413559	0.0527348	-0.137081	0.089	0.123	1
Rtn1	0.113678	0.24244	0.211076	0.323882	0.252545	0.400455	0.274543	-0.137023	0.086	0.102	1
Snx24	1.63477	1.71441	1.04387	1.46521	1.76864	1.80606	0.0407763	-0.136817	0.402	0.464	1
Gigyf1	0.329943	0.207479	0.253125	0.253446	0.380513	0.469169	0.103777	-0.136628	0.109	0.139	1
Hsd17b11	0.606916	0.622896	0.580772	0.621166	0.793685	0.802487	0.0268947	-0.136364	0.22	0.28	1
Stau1	0.491683	0.543936	0.481797	0.601358	0.686678	0.645935	0.0559004	-0.136274	0.192	0.235	1
Pdss2	0.252169	0.196062	0.160831	0.258409	0.35434	0.305024	0.0274579	-0.1361	0.079	0.117	1
Nrbf2	0.344562	0.363378	0.285463	0.381982	0.409788	0.601598	0.0669305	-0.135981	0.136	0.172	1
5031425E22Rik	0.935841	1.36436	0.961162	1.55441	1.28638	1.21277	0.147141	-0.135933	0.352	0.387	1
Bcl6	0.992006	0.790812	0.795202	1.44149	0.942059	0.939782	0.0318673	-0.135926	0.268	0.323	1
Galnt2	0.526636	0.479222	0.635007	0.606688	0.715085	0.718976	0.166977	-0.135922	0.221	0.25	1
Chmp2a	1.72142	1.63119	1.60284	1.93934	1.83937	2.008	0.0540957	-0.1359	0.493	0.538	1
Elmsan1	0.144339	0.2855	0.239187	0.434765	0.365066	0.272263	0.0701641	-0.135803	0.096	0.127	1
Kdm7a	0.874997	0.915321	1.09986	1.39799	1.10473	1.08953	0.163945	-0.135796	0.332	0.354	1
Sh3pxd2a	0.858207	0.791161	0.818794	1.05186	0.985793	0.990363	0.120534	-0.135688	0.306	0.344	1
Atxn7	0.596131	0.594279	0.629076	0.967703	0.733983	0.688627	0.283976	-0.135553	0.235	0.256	1
Cers6	0.274643	0.369142	0.257982	0.241245	0.504605	0.436975	0.0628521	-0.135322	0.124	0.162	1
H2-Q4	0.175062	0.217963	0.204961	0.451501	0.346241	0.194905	0.0595518	-0.135224	0.086	0.119	1
Tmem173	0.480397	0.422785	0.410695	0.545119	0.619068	0.530823	0.14993	-0.135137	0.18	0.209	1
Dock1	0.855891	0.970009	0.956086	1.29969	1.17266	0.929458	0.130353	-0.135104	0.324	0.362	1
Plekhm2	0.561697	0.650682	0.646896	0.949874	0.765164	0.706141	0.638176	-0.135022	0.246	0.249	1
Tex14	1.50463	1.01397	1.37511	1.0974	1.42239	1.86964	0.422074	-0.134843	0.362	0.376	1
Map3k3	0.470557	0.614387	0.47171	0.651824	0.708043	0.63598	0.180054	-0.13484	0.212	0.239	1
Fam120b	0.22512	0.272577	0.180164	0.565583	0.299334	0.296864	0.0931543	-0.134816	0.102	0.133	1
Zfp869	0.335471	0.439985	0.314695	0.583994	0.428214	0.570752	0.186454	-0.13479	0.144	0.17	1
Junb	2.65895	2.84599	2.90345	3.01178	2.82576	3.84584	0.0752556	-0.134729	0.623	0.65	1
4833438C02Rik	0.29306	0.32311	0.326276	0.507955	0.402795	0.469801	0.0444423	-0.134712	0.119	0.16	1
Rbm28	0.336472	0.42906	0.366219	0.480291	0.565328	0.459648	0.0402635	-0.13464	0.157	0.2	1
Kdm3b	0.416186	0.329636	0.2082	0.531693	0.454048	0.380497	0.157602	-0.134486	0.134	0.16	1
Nr3c2	0.441482	0.583293	0.672256	0.81845	0.784673	0.564132	0.381131	-0.13447	0.18	0.196	1
Diaph2	3.0559	2.99995	3.41722	3.02496	3.90185	3.32651	0.219057	-0.134423	0.633	0.658	1
Krtcap2	1.64802	1.37375	1.82765	1.50273	1.86996	2.04609	0.251026	-0.134344	0.489	0.501	1
Pou2f2	1.06677	1.47396	0.847866	1.49781	1.57583	0.936776	0.0804598	-0.134301	0.337	0.378	1
Gm47819	0.154467	0.214465	0.153818	0.0942156	0.310695	0.381486	0.00954409	-0.134269	0.073	0.117	1
Med15	0.384087	0.420934	0.448472	0.522455	0.62424	0.469115	0.140914	-0.133723	0.169	0.2	1
Cc2d1b	0.249336	0.353505	0.207835	0.393488	0.36746	0.453505	0.0877738	-0.133657	0.119	0.153	1
Pde4d	2.92719	2.18133	1.51165	3.32413	2.66824	1.74376	0.0243509	-0.133656	0.412	0.456	1
Galnt10	0.324739	0.345946	0.373596	0.520901	0.452798	0.494656	0.0132687	-0.133261	0.119	0.17	1
B4galt5	0.274223	0.319221	0.237891	0.379785	0.460425	0.327374	0.0205062	-0.133219	0.114	0.162	1
Lcmt1	0.276151	0.293055	0.288151	0.531574	0.433639	0.301379	0.0990286	-0.133217	0.119	0.151	1
Abca1	4.14571	3.27475	2.5074	4.4474	3.44301	3.68243	0.0763426	-0.133185	0.691	0.71	1
Srpk2	0.824965	0.660665	0.791737	0.785603	0.943962	0.967747	0.0729843	-0.132972	0.26	0.311	1
Tbc1d22a	0.540801	0.521351	0.669105	0.870512	0.753655	0.595543	0.0913412	-0.132935	0.218	0.254	1
Aftph	1.34638	1.14991	0.898392	1.50946	1.23995	1.37869	0.294024	-0.132902	0.382	0.391	1
Ank2	0.65802	0.459886	0.69251	0.861145	0.797065	0.600699	0.312676	-0.132819	0.2	0.221	1
Smyd3	1.09997	1.00405	1.12892	1.54523	1.31515	1.04037	0.61758	-0.132816	0.339	0.333	1
Nfya	0.211987	0.261209	0.308594	0.598112	0.337925	0.32432	0.0339228	-0.132791	0.099	0.141	1
Ptpn23	0.210264	0.152746	0.105377	0.268785	0.305144	0.203312	0.0265841	-0.132751	0.064	0.1	1
Synj1	1.05687	0.984748	0.918586	1.23117	1.13369	1.21089	0.196366	-0.132448	0.34	0.37	1
Coq8b	0.141797	0.141604	0.151854	0.249686	0.250692	0.265065	0.00648496	-0.132427	0.063	0.108	1
Gsap	0.318989	0.297909	0.253968	0.423292	0.410329	0.415057	0.192845	-0.132388	0.127	0.155	1
Pspc1	0.28091	0.340013	0.286824	0.404316	0.4418	0.428478	0.0913529	-0.132298	0.129	0.162	1
Romo1	2.24151	2.11825	2.16053	2.33731	2.59114	2.36774	0.0553805	-0.132147	0.635	0.64	1
Abr	0.524973	0.493743	0.279151	0.767731	0.56979	0.457171	0.068353	-0.131912	0.157	0.196	1
Fam102b	0.625797	0.450314	0.593287	0.752447	0.731279	0.609276	0.420588	-0.131728	0.218	0.231	1
Micu2	0.23502	0.391801	0.208481	0.488655	0.433613	0.321072	0.187791	-0.131716	0.131	0.155	1
Il13ra1	0.747504	0.506401	0.592342	0.707349	0.624133	1.00868	0.0373614	-0.13171	0.217	0.266	1
Pbdc1	0.36127	0.32185	0.315394	0.312184	0.511577	0.464252	0.0271983	-0.131606	0.131	0.176	1
Myh10	0.160399	0.147666	0.116069	0.166656	0.331508	0.172531	0.00482853	-0.131581	0.055	0.1	1
Baz1a	0.592356	0.662623	0.662825	0.648499	0.811654	0.86623	0.248987	-0.131254	0.248	0.272	1
Osbpl8	0.748716	0.878576	0.872204	1.32211	1.03696	0.784103	0.607436	-0.131011	0.301	0.301	1
Efhd2	2.25973	1.98174	1.71616	2.31363	2.32373	2.13862	0.184168	-0.130728	0.564	0.568	1
Srsf3	2.80265	1.78659	2.13685	3.05549	2.25726	2.57623	0.0286959	-0.130297	0.565	0.611	1
Rnpep	1.06443	1.01772	1.20114	1.42904	1.33277	1.13007	0.134719	-0.13007	0.397	0.419	1
Chd9	1.09838	1.27562	1.08749	1.40171	1.3899	1.30595	0.0399281	-0.130003	0.365	0.423	1
P2rx7	1.1235	1.47309	1.42678	1.54216	1.53134	1.66116	0.839529	-0.129797	0.405	0.391	1
Limd2	0.96264	0.554698	0.641309	1.29077	0.703086	0.867493	0.151394	-0.12966	0.246	0.282	1
Mnat1	0.223974	0.178146	0.244632	0.205166	0.317746	0.41646	0.00546388	-0.129639	0.088	0.141	1
Emc10	1.01394	0.862101	0.890352	1.42474	0.933347	1.15899	0.816028	-0.129634	0.342	0.331	1
Mepce	0.686947	0.709691	0.681749	0.614016	0.668331	1.29094	0.0767219	-0.129491	0.225	0.27	1
Eefsec	0.133427	0.148839	0.162529	0.260825	0.259447	0.248862	0.0376082	-0.129482	0.066	0.1	1
Metap2	1.33285	1.79177	1.29992	1.99115	1.81224	1.44237	0.172498	-0.129459	0.478	0.497	1
Mbd6	0.190484	0.292798	0.191405	0.306285	0.421545	0.24592	0.0621571	-0.12918	0.099	0.135	1
Mill2	0.548553	0.690427	0.757789	1.10628	0.772581	0.738727	0.143419	-0.129167	0.233	0.264	1
Tor1b	0.248904	0.195979	0.258757	0.365271	0.328604	0.365996	0.0351109	-0.129022	0.104	0.143	1
AB124611	0.444784	0.423003	0.555788	0.574365	0.61562	0.621282	0.0692044	-0.128938	0.18	0.223	1
Gt(ROSA)26Sor	0.738945	0.872446	0.82397	0.885801	0.902326	1.18039	0.635439	-0.128809	0.288	0.286	1
Aim2	0.547287	0.529505	0.608933	1.06145	0.52767	0.773075	0.124189	-0.128726	0.212	0.247	1
Zc3h13	0.595426	0.653249	0.493605	0.597896	0.836667	0.649491	0.132955	-0.128722	0.195	0.233	1
Ddost	1.14934	1.03201	1.35079	1.34979	1.44086	1.27352	0.229232	-0.128443	0.402	0.421	1
Trim56	0.317375	0.16107	0.166435	0.223293	0.389053	0.277566	0.0986769	-0.128385	0.098	0.127	1
Nsa2	3.1976	6.14121	3.58102	3.88588	5.16071	5.22727	0.0678279	-0.128312	0.783	0.798	1
Dctn4	0.502841	0.841674	0.602467	0.606676	0.978176	0.689657	0.12185	-0.128131	0.261	0.297	1
Slc7a6os	0.0794406	0.18796	0.190688	0.217346	0.28964	0.249156	0.00526264	-0.127981	0.058	0.102	1
Snrpg	3.49891	3.71488	3.81571	3.49239	4.24977	4.28145	0.0234404	-0.127954	0.767	0.795	1
Ugcg	0.388755	0.350201	0.304006	0.323521	0.416591	0.649844	0.129224	-0.127852	0.144	0.174	1
Polr2k	0.970188	0.698537	0.887503	0.533392	1.10039	1.15984	0.214653	-0.127702	0.329	0.348	1
Zfp36	2.33435	2.21345	2.58056	2.63259	1.95996	3.84743	0.71859	-0.12765	0.582	0.569	1
Gm10138	0.240342	0.31601	0.229264	0.245128	0.320128	0.564268	0.235114	-0.127457	0.101	0.121	1
Numb	0.288536	0.271141	0.287212	0.435909	0.437991	0.316951	0.13964	-0.127248	0.117	0.145	1
Frmd4a	0.25429	0.205287	0.275586	0.233684	0.386051	0.38592	0.124509	-0.127226	0.094	0.123	1
Abl1	0.338294	0.571413	0.437514	0.78686	0.461732	0.682573	0.179858	-0.127208	0.18	0.205	1
Acin1	1.02361	1.1106	1.21552	1.23765	1.38454	1.24456	0.117547	-0.12712	0.39	0.432	1
Tbc1d13	0.130185	0.154585	0.278017	0.19668	0.341809	0.282565	0.0416243	-0.126933	0.083	0.117	1
Srgn	4.27453	4.4811	4.53942	5.31009	4.51686	5.37312	0.0686783	-0.12651	0.76	0.783	1
Evl	0.316354	0.450926	0.429824	0.490154	0.560209	0.512874	0.0803368	-0.126483	0.165	0.207	1
Slc25a11	0.503927	0.57154	0.737905	1.29722	0.535641	0.761684	0.154613	-0.126347	0.235	0.262	1
Pbx1	0.681812	0.638653	0.727836	0.702306	0.848088	0.891056	0.578706	-0.126294	0.223	0.231	1
Gnaq	3.64799	3.84855	4.09018	4.57815	4.15674	4.39083	0.151979	-0.12629	0.744	0.769	1
Far1	0.727964	0.657736	0.910767	0.758937	1.02313	0.856036	0.432616	-0.126274	0.286	0.297	1
Nhsl2	0.823178	0.757899	0.701836	1.10726	0.968271	0.731167	0.0186551	-0.126039	0.245	0.307	1
Rsrc2	0.65344	1.11017	0.932484	1.12943	1.05276	1.12569	0.181584	-0.126006	0.307	0.335	1
Wdfy2	1.07076	1.23821	0.954273	1.50102	1.19938	1.3007	0.137855	-0.126001	0.372	0.401	1
Eif3j1	0.497529	1.25852	0.553407	0.890127	0.924151	1.07968	0.0227046	-0.124832	0.278	0.342	1
Gpaa1	0.33511	0.232837	0.227886	0.457817	0.32258	0.411654	0.0695774	-0.124696	0.107	0.143	1
Ccdc12	1.89822	1.34726	1.17709	1.92957	1.61988	1.62944	0.0902454	-0.124683	0.464	0.501	1
Rel	0.7926	0.846249	1.00485	1.23322	1.09888	0.861233	0.222425	-0.124397	0.322	0.341	1
Copg1	0.266573	0.228027	0.221176	0.463545	0.355709	0.268667	0.0855897	-0.124381	0.109	0.141	1
Spic	0.235148	0.212437	0.218379	0.320046	0.34463	0.31649	0.138422	-0.124374	0.096	0.121	1
Ifi207	4.25789	4.71477	4.24066	4.34108	4.63279	5.70637	0.371409	-0.124318	0.821	0.793	1
Eprs	0.306995	0.457063	0.453237	0.553214	0.54744	0.51109	0.156284	-0.124107	0.164	0.196	1
Eif4h	0.842411	0.798871	0.826501	1.17641	0.878043	1.03666	0.0263127	-0.124046	0.299	0.352	1
Uvrag	1.22695	1.39455	1.50019	2.12635	1.50499	1.40265	0.191598	-0.123975	0.418	0.44	1
Phactr1	0.280272	0.212047	0.188903	0.412279	0.285145	0.367915	0.0581587	-0.123914	0.074	0.108	1
Tom1l2	0.29746	0.356053	0.330024	0.592808	0.424345	0.401704	0.232513	-0.123836	0.14	0.162	1
Il18	0.647173	0.436442	0.433159	0.544565	0.664944	0.637132	0.184686	-0.123733	0.19	0.221	1
Hlcs	0.122331	0.19311	0.292304	0.166707	0.331769	0.365357	0.067259	-0.123566	0.078	0.11	1
Hacd4	2.62437	2.62365	2.97482	3.09594	3.1254	2.96622	0.149805	-0.123564	0.646	0.685	1
Mpp5	0.305113	0.264919	0.289967	0.4073	0.376034	0.433004	0.151927	-0.123384	0.124	0.151	1
Arhgap39	0.349577	0.2227	0.366452	0.435162	0.46052	0.357652	0.0331926	-0.123251	0.122	0.166	1
Fermt3	1.36042	1.37955	1.39078	1.28713	1.65454	1.66868	0.0884695	-0.123165	0.425	0.466	1
Zfp516	0.302011	0.339456	0.385456	0.635608	0.37636	0.493533	0.0660756	-0.122951	0.142	0.18	1
Utp14a	0.360478	0.303366	0.327735	0.266191	0.543671	0.401692	0.155345	-0.122904	0.132	0.159	1
Fli1	3.0096	2.3682	2.64976	3.9191	2.917	2.50017	0.499683	-0.122876	0.64	0.636	1
Lpcat2	0.556834	0.522064	0.553856	0.553756	0.706971	0.71263	0.0915015	-0.12269	0.197	0.239	1
Dalrd3	0.221484	0.273025	0.232538	0.176391	0.457197	0.300561	0.0714562	-0.122543	0.104	0.137	1
Mex3c	0.183131	0.19727	0.225825	0.320829	0.285824	0.337312	0.0378175	-0.122454	0.076	0.112	1
Atp6v1c1	0.726971	0.877052	0.48929	1.17817	0.858439	0.666522	0.322172	-0.122288	0.279	0.292	1
Tiparp	0.922719	0.958575	1.01599	1.38166	1.03122	1.16605	0.194152	-0.122285	0.309	0.344	1
Tln1	2.17498	2.57931	2.14869	2.68239	2.78532	2.29575	0.205975	-0.121969	0.617	0.628	1
Luc7l2	2.26387	1.60554	2.28973	2.22857	2.10502	2.61924	0.103898	-0.12191	0.55	0.585	1
Gmds	0.33033	0.402078	0.327695	0.439655	0.387586	0.636763	0.171824	-0.121149	0.127	0.155	1
Arid4a	1.16507	0.709129	1.0099	1.02296	1.3112	0.853429	0.147411	-0.121114	0.312	0.348	1
Ralgps1	0.14356	0.149219	0.26058	0.251448	0.285399	0.308855	0.0206828	-0.120736	0.076	0.115	1
Adam33	0.800021	0.566241	0.728995	0.983387	0.718201	0.93459	0.169393	-0.120735	0.225	0.256	1
Mylip	0.7404	0.833913	0.822797	1.20659	0.866898	0.955819	0.0811345	-0.120616	0.273	0.319	1
Spty2d1	0.230289	0.397197	0.321286	0.445284	0.478288	0.368845	0.0366734	-0.120556	0.129	0.176	1
Tnrc6c	0.75482	0.608081	0.711368	0.794704	0.716068	1.03916	0.147091	-0.12044	0.258	0.288	1
Mad1l1	0.174228	0.220579	0.0863893	0.238939	0.278069	0.260265	0.023787	-0.120431	0.071	0.11	1
Fgd3	0.193337	0.216208	0.183721	0.408293	0.293275	0.254361	0.169456	-0.12001	0.086	0.108	1
R3hcc1l	0.423291	0.469021	0.39733	0.599737	0.500215	0.619311	0.0616782	-0.119858	0.164	0.205	1
Rbm5	0.573235	0.739486	0.603081	1.14424	0.738903	0.650535	0.113587	-0.119801	0.236	0.272	1
Rassf4	1.67724	1.69798	1.96714	2.44008	1.89986	1.94717	0.131844	-0.119395	0.511	0.546	1
Btg1	1.92602	4.99649	2.41444	2.59404	3.70803	4.0708	0.0283863	-0.119377	0.631	0.681	1
Lrch1	0.812132	0.935712	0.963902	1.46614	1.06337	0.846272	0.391622	-0.119368	0.321	0.325	1
Cep170	0.556284	0.816239	0.634558	0.777016	0.754209	0.964939	0.106313	-0.119356	0.256	0.297	1
M6pr	0.984283	1.03136	0.715907	1.11055	1.04198	1.12749	0.109583	-0.119345	0.306	0.342	1
Tox4	0.416589	0.405792	0.563508	0.613621	0.571589	0.589572	0.438017	-0.119317	0.197	0.207	1
Katna1	0.415278	0.40916	0.47113	0.719846	0.585096	0.404213	0.22278	-0.119221	0.175	0.2	1
Rbms1	2.94768	2.55912	2.72706	2.79162	3.15262	3.04722	0.518133	-0.119047	0.651	0.632	1
Phf20l1	0.65317	0.824731	0.84915	0.970097	0.927836	0.920407	0.235215	-0.118853	0.281	0.307	1
Dok2	1.11458	1.29489	1.20449	1.803	1.39086	1.1744	0.117458	-0.118793	0.383	0.427	1
Pmm2	0.157336	0.322288	0.229875	0.463096	0.355864	0.270029	0.0426389	-0.118532	0.098	0.135	1
Sash1	1.71958	1.71971	1.21871	1.83075	1.94772	1.47969	0.159419	-0.118493	0.468	0.499	1
Sptlc1	0.233429	0.215983	0.239057	0.412284	0.319637	0.308297	0.0436995	-0.118365	0.099	0.137	1
Zfp992	0.313111	0.151919	0.261022	0.293004	0.321217	0.401822	0.0295861	-0.118343	0.096	0.139	1
Mfap1b	0.330218	0.281276	0.303849	0.443862	0.415763	0.395264	0.350601	-0.118326	0.127	0.145	1
Pak1	0.491152	0.39055	0.43456	0.729203	0.599747	0.386775	0.0984261	-0.118289	0.157	0.196	1
Sertad2	0.503508	0.567624	0.739461	0.55422	0.806493	0.747044	0.020435	-0.118263	0.198	0.258	1
Ern1	0.398081	0.378828	0.310278	0.365365	0.504966	0.506807	0.0993986	-0.118107	0.131	0.164	1
Myo9b	0.571489	0.562174	0.468196	0.515035	0.705478	0.694658	0.134692	-0.118087	0.205	0.237	1
Amd1	0.117373	0.189388	0.169176	0.32914	0.220895	0.280729	0.0286575	-0.118063	0.069	0.106	1
Dido1	0.257289	0.247072	0.316224	0.450393	0.400487	0.30702	0.0720928	-0.118043	0.111	0.147	1
Nrip1	0.855436	0.870531	0.767878	1.20496	0.975667	0.880051	0.482674	-0.11785	0.296	0.303	1
Rlf	0.426621	0.22606	0.25676	0.556633	0.395791	0.333614	0.36224	-0.11783	0.124	0.137	1
Phf20	1.03468	0.903259	0.918818	1.38714	1.11514	0.945434	0.322161	-0.117751	0.316	0.339	1
Dglucy	0.262577	0.208522	0.218712	0.505092	0.250158	0.358752	0.168637	-0.117737	0.101	0.123	1
Pla2g2d	1.17679	0.956986	1.01834	1.78838	1.10681	1.04436	0.0363944	-0.11765	0.23	0.294	1
Psmb9	0.628745	0.476117	0.579563	0.601135	0.595849	0.885031	0.0751828	-0.117623	0.198	0.245	1
Prxl2a	0.220054	0.135686	0.122429	0.354546	0.235365	0.226568	0.0242732	-0.117597	0.063	0.1	1
Mrps16	0.718869	0.429432	0.583665	0.779844	0.696372	0.653293	0.0558993	-0.117203	0.233	0.28	1
Coro1a	3.51963	1.73039	2.06689	2.32663	2.72758	2.76605	0.27191	-0.116657	0.552	0.566	1
Pik3r5	0.601163	0.585153	0.353788	0.569358	0.632171	0.707612	0.461451	-0.116646	0.183	0.196	1
Ndufv3	1.80989	1.63654	1.66915	1.81533	2.17007	1.60731	0.108382	-0.11656	0.512	0.55	1
Adam19	0.861823	0.832836	0.811058	1.28844	0.996111	0.795957	0.181882	-0.116484	0.291	0.319	1
Wrn	0.20746	0.295752	0.180209	0.116899	0.300026	0.52512	0.117334	-0.116423	0.106	0.133	1
Smpdl3b	0.406203	0.399626	0.42763	0.613648	0.457252	0.591411	0.0853934	-0.116281	0.165	0.204	1
Ndufb2	1.14627	0.871441	0.857127	1.13249	1.21607	0.939644	0.119964	-0.116259	0.334	0.376	1
Pdia4	0.731061	1.07308	0.542584	0.561266	1.02467	1.07148	0.600868	-0.116168	0.283	0.294	1
Lpgat1	0.237747	0.315425	0.1746	0.454435	0.270214	0.418114	0.0831126	-0.116087	0.106	0.139	1
Pvt1	0.256324	0.274922	0.284285	0.371072	0.441028	0.284473	0.166857	-0.115919	0.109	0.135	1
Tubb2a	1.06999	0.863157	0.797518	1.65437	0.895235	0.974344	0.139664	-0.115892	0.304	0.346	1
Matk	0.21111	0.238696	0.199829	0.290146	0.265922	0.423323	0.0702405	-0.115866	0.088	0.119	1
Slfn2	1.66796	1.26215	1.30193	1.42232	1.64343	1.63193	0.320296	-0.115739	0.408	0.431	1
Tet2	0.325819	0.444142	0.241559	0.69654	0.423376	0.361443	0.099789	-0.11561	0.126	0.159	1
Txlna	0.30145	0.579611	0.423025	0.518387	0.586983	0.561612	0.231277	-0.115511	0.175	0.2	1
Zfp148	0.771915	0.599508	0.922346	0.995976	0.909428	0.829673	0.0599983	-0.115492	0.255	0.303	1
Scpep1	1.69382	2.1602	1.81171	2.08327	2.01704	2.40248	0.227279	-0.115482	0.539	0.552	1
Hbp1	0.563026	0.660415	0.63668	0.87256	0.686736	0.803291	0.478461	-0.115344	0.246	0.262	1
Zfas1	0.513724	0.521561	0.716186	0.674406	0.790617	0.612562	0.544843	-0.115272	0.221	0.231	1
Cflar	1.95376	1.80227	1.55437	1.37442	2.07686	2.25447	0.221113	-0.115174	0.521	0.534	1
Adprh	0.393674	0.603697	0.511891	0.604033	0.761773	0.45708	0.301973	-0.115158	0.208	0.229	1
9930111J21Rik2	0.510061	0.619824	0.661834	0.857189	0.660367	0.771688	0.240309	-0.114832	0.231	0.258	1
Dennd1c	0.413288	0.555796	0.437773	0.446387	0.70037	0.524833	0.0167114	-0.114787	0.164	0.223	1
Il15	0.496409	0.405669	0.386821	0.526071	0.536557	0.570715	0.0541424	-0.114761	0.165	0.211	1
Slc38a6	0.558169	0.703003	0.605762	0.798704	0.71254	0.821272	0.253203	-0.11473	0.231	0.26	1
Ddx58	0.27909	0.235988	0.212826	0.248771	0.356401	0.383021	0.0759411	-0.114618	0.094	0.127	1
Slbp	0.791491	0.855577	0.858344	1.18791	0.979394	0.882588	0.641724	-0.114389	0.298	0.299	1
Dcp2	0.301619	0.201127	0.282783	0.191176	0.307438	0.549939	0.114271	-0.114342	0.111	0.139	1
Zdhhc14	2.62816	2.10298	3.30259	3.97922	2.64801	2.78963	0.363173	-0.114313	0.62	0.609	1
Cdkal1	0.4483	0.456418	0.466084	0.586231	0.516358	0.667917	0.211232	-0.114206	0.179	0.205	1
Ncf2	1.72715	1.41925	1.24338	1.50929	1.73685	1.62486	0.0491351	-0.114187	0.456	0.495	1
Gab3	0.562709	0.618827	0.725522	0.649795	0.891688	0.651176	0.302395	-0.114052	0.226	0.245	1
Nop56	0.300172	0.338614	0.272532	0.501175	0.394141	0.390089	0.314436	-0.113905	0.126	0.143	1
Rpn2	1.32887	1.18536	1.20756	1.74865	1.36052	1.31324	0.210937	-0.11382	0.413	0.442	1
Prex1	1.05255	0.771789	0.786466	0.927452	1.11561	0.90571	0.150001	-0.1138	0.307	0.344	1
Emc3	0.396309	0.741491	0.478069	0.895803	0.661854	0.579601	0.435479	-0.113797	0.225	0.237	1
Sec22b	0.311	0.325374	0.228099	0.457877	0.422314	0.315766	0.100674	-0.113627	0.134	0.166	1
Stat1	0.161001	0.340782	0.262145	0.360183	0.336399	0.412283	0.152648	-0.113626	0.099	0.125	1
Srp68	0.236127	0.212705	0.148868	0.292981	0.272041	0.341275	0.0393638	-0.113607	0.084	0.121	1
Tlr2	0.560256	0.471054	0.410125	0.539635	0.604554	0.626717	0.51422	-0.113093	0.183	0.196	1
2610037D02Rik	0.182183	0.32213	0.280314	0.432793	0.345356	0.370028	0.104894	-0.113037	0.094	0.123	1
Derl2	0.727402	0.635903	0.614809	0.551676	0.890168	0.781478	0.263053	-0.113033	0.25	0.278	1
Crtc3	0.356551	0.364199	0.443662	0.736075	0.443857	0.446017	0.480069	-0.112754	0.165	0.176	1
Trim12c	0.288298	0.279964	0.324103	0.335222	0.416765	0.418679	0.142099	-0.112673	0.122	0.151	1
Ankra2	0.238702	0.321899	0.274308	0.379623	0.379886	0.397836	0.107656	-0.11247	0.114	0.145	1
Ap2b1	0.916166	1.30612	1.0109	1.27578	1.24654	1.28331	0.103806	-0.112366	0.365	0.411	1
Rprd1b	0.139774	0.179224	0.206383	0.24199	0.242914	0.333784	0.120803	-0.112348	0.076	0.102	1
Rere	1.18757	1.31497	1.51006	1.83694	1.41555	1.51903	0.337817	-0.112275	0.426	0.44	1
Gm9725	0.288349	0.385689	0.320221	0.378709	0.411603	0.53241	0.0399438	-0.112027	0.129	0.172	1
St3gal6	2.62734	2.7238	2.44839	3.58085	2.71805	2.76945	0.0892096	-0.112001	0.583	0.632	1
Pacs1	0.844267	0.731366	1.12182	1.30171	0.961006	1.0149	0.0679629	-0.111931	0.273	0.323	1
Strada	0.147526	0.132228	0.185015	0.213768	0.241745	0.273875	0.0132203	-0.111615	0.061	0.102	1
Prkch	0.505282	0.471975	0.329676	0.524674	0.606018	0.482675	0.52863	-0.111375	0.182	0.192	1
Klf2	2.71756	2.51195	3.57771	3.2401	2.73592	4.00172	0.079105	-0.111271	0.544	0.611	1
Fosb	1.78679	1.79699	2.71046	3.0245	2.46122	1.70894	0.217123	-0.111231	0.448	0.481	1
Irak4	0.368511	0.383783	0.387842	0.533479	0.491783	0.463882	0.0815013	-0.111096	0.16	0.196	1
Ist1	0.378561	0.59291	0.361782	0.67161	0.552743	0.537237	0.209773	-0.110813	0.198	0.225	1
Ap3d1	0.489601	0.646339	0.420796	0.903434	0.740379	0.34878	0.136832	-0.110663	0.197	0.231	1
Ms4a14	0.243387	0.19723	0.39059	0.221416	0.355778	0.496228	0.0967297	-0.110553	0.102	0.133	1
Ppt2	0.280142	0.339488	0.269318	0.211475	0.464455	0.41969	0.492648	-0.110345	0.136	0.147	1
Zcchc9	0.241513	0.301053	0.409618	0.370838	0.445913	0.416312	0.203929	-0.110325	0.136	0.16	1
Zfp512	0.201408	0.211088	0.316262	0.296889	0.389286	0.288699	0.0420328	-0.110175	0.099	0.139	1
Fbxl20	0.283081	0.221114	0.253628	0.339286	0.338443	0.372622	0.393002	-0.110023	0.109	0.123	1
Crat	0.236909	0.409672	0.376431	0.548622	0.516244	0.296318	0.117935	-0.110013	0.147	0.18	1
Stk17b	3.03986	3.42491	3.51601	3.0469	3.34823	4.5937	0.298694	-0.109954	0.679	0.701	1
Clcn5	1.1396	0.968309	1.27336	1.41043	1.2308	1.29506	0.194	-0.10989	0.37	0.391	1
Ylpm1	0.325346	0.410999	0.332158	0.468128	0.50411	0.409031	0.172367	-0.109827	0.152	0.182	1
F830016B08Rik	0.0997984	0.147941	0.343487	0.31142	0.256957	0.330352	0.00922093	-0.109753	0.073	0.117	1
Stmn1	0.421228	0.487035	0.315242	1.14841	0.398923	0.343883	0.249169	-0.109751	0.137	0.162	1
Bclaf1	0.8039	0.995514	0.781513	1.37681	0.990683	0.840702	0.0776764	-0.109737	0.306	0.346	1
Snd1	0.70809	0.587617	0.69629	1.04686	0.734283	0.72206	0.296249	-0.109715	0.245	0.262	1
Tuba1a	0.603786	0.496951	0.622627	0.6927	0.685623	0.705421	0.0826923	-0.109549	0.188	0.233	1
Rhog	1.25146	1.42641	1.29308	1.56983	1.51028	1.48798	0.064748	-0.109405	0.426	0.477	1
Traf6	0.117057	0.190167	0.245709	0.277146	0.273535	0.288872	0.0685777	-0.109217	0.083	0.114	1
Gbp7	0.611112	0.598087	0.42902	0.773452	0.6786	0.592724	0.118504	-0.109111	0.198	0.233	1
Srsf11	1.48262	1.46367	1.54696	2.17944	1.64987	1.46319	0.202051	-0.109044	0.473	0.483	1
Mrpl3	0.399979	0.268525	0.283647	0.297542	0.488953	0.372058	0.514584	-0.10885	0.142	0.153	1
Mrpl1	0.127787	0.22781	0.220791	0.155599	0.286805	0.373299	0.12664	-0.108839	0.089	0.117	1
Huwe1	0.438759	0.57025	0.528187	0.508009	0.638044	0.708433	0.265047	-0.108367	0.2	0.221	1
Resf1	0.582836	0.601355	0.72549	0.853444	0.700456	0.807018	0.172032	-0.108317	0.245	0.278	1
Ifi47	0.240461	0.288392	0.148417	0.290379	0.333554	0.33263	0.0968916	-0.1083	0.088	0.117	1
Tbc1d1	0.273296	0.237738	0.387596	0.479295	0.409287	0.328468	0.473539	-0.108213	0.126	0.137	1
Themis2	0.427728	0.35874	0.306518	0.491835	0.47374	0.447961	0.251987	-0.108205	0.154	0.174	1
Sars	0.531644	0.747628	0.588018	0.583021	0.846148	0.725422	0.225075	-0.10817	0.25	0.278	1
Hs2st1	0.573986	0.386661	0.705886	0.753438	0.760924	0.459457	0.317309	-0.107863	0.19	0.209	1
Tcf12	1.36915	1.46088	1.13953	1.67574	1.35724	1.65658	0.865498	-0.10779	0.421	0.409	1
Med27	0.109616	0.160625	0.21349	0.178909	0.314716	0.197316	0.0141733	-0.107754	0.066	0.108	1
Rnf213	0.342456	0.604786	0.274339	0.618025	0.482445	0.552337	0.098221	-0.107681	0.145	0.182	1
Vav3	2.21719	1.96082	1.95395	2.3567	2.3289	2.12812	0.175706	-0.107614	0.521	0.562	1
Helz	0.394115	0.387771	0.420922	0.607915	0.497814	0.46533	0.293521	-0.107455	0.157	0.178	1
Ms4a7	6.33872	6.16529	4.80793	6.39405	5.94539	6.83587	0.160232	-0.107454	0.802	0.818	1
Med1	0.164354	0.255713	0.219662	0.311255	0.333155	0.273957	0.0586899	-0.107247	0.091	0.125	1
Bola1	0.325759	0.163834	0.278754	0.291037	0.360349	0.356058	0.0782346	-0.107196	0.109	0.143	1
Mir22hg	0.298415	0.337279	0.330271	0.572747	0.300157	0.534593	0.266659	-0.107144	0.136	0.155	1
Atp13a3	0.613907	0.299996	0.288945	0.494125	0.560427	0.403286	0.0934918	-0.107092	0.147	0.184	1
Tapbp	1.43177	1.49667	1.31742	2.03668	1.65233	1.27186	0.0890765	-0.107005	0.445	0.474	1
Rb1	0.713679	0.892109	0.777823	1.12852	0.966019	0.78406	0.112212	-0.106633	0.284	0.323	1
Tbxas1	2.19974	2.00867	2.26619	3.11534	2.08206	2.43795	0.159664	-0.106411	0.564	0.601	1
Gm36738	0.170448	0.251574	0.220444	0.352621	0.316822	0.274091	0.0714753	-0.106376	0.084	0.115	1
Mvp	0.513565	0.68996	0.477641	0.907817	0.779832	0.41132	0.232487	-0.10622	0.22	0.243	1
Gm10134	0.319436	0.483155	0.472041	0.495825	0.590338	0.484194	0.160625	-0.106042	0.172	0.198	1
Gm13212	0.200273	0.0973601	0.103293	0.102949	0.259044	0.217609	0.00924072	-0.105855	0.058	0.1	1
Kdm5a	0.211603	0.269847	0.338869	0.363515	0.354248	0.402609	0.127573	-0.10574	0.122	0.153	1
Srsf6	0.990673	0.645693	0.973247	0.824697	0.941187	1.18533	0.252634	-0.105707	0.312	0.341	1
Dnttip2	0.554039	0.299303	0.430639	0.584684	0.540618	0.467402	0.0923857	-0.105695	0.172	0.207	1
Slc26a2	0.184118	0.187717	0.229485	0.328233	0.362823	0.154314	0.118177	-0.105479	0.083	0.11	1
Mllt10	0.717989	0.746209	0.847774	0.794901	0.861789	1.03784	0.310652	-0.105389	0.274	0.29	1
Mylk	0.388684	0.718647	0.400907	0.68361	0.579844	0.684843	0.304484	-0.105334	0.193	0.213	1
0610040J01Rik	0.217266	0.21153	0.320967	0.45103	0.279284	0.377051	0.157794	-0.105098	0.098	0.123	1
Umad1	0.350889	0.44549	0.51057	0.286718	0.674318	0.500287	0.174354	-0.105076	0.165	0.196	1
Dock10	1.45003	1.49042	1.01535	1.67578	1.61834	1.21294	0.643592	-0.105005	0.403	0.397	1
Clic4	1.57958	2.12602	1.94005	2.59909	2.10184	1.85922	0.164978	-0.104915	0.502	0.524	1
Hps4	0.279207	0.292829	0.175322	0.438165	0.355514	0.273516	0.117042	-0.104834	0.099	0.127	1
Metrnl	1.33848	1.00363	0.934669	1.25459	1.12496	1.4134	0.702295	-0.104815	0.349	0.35	1
Sqstm1	1.63457	1.93644	1.36049	2.06217	1.81274	1.81831	0.428475	-0.104757	0.481	0.499	1
Arid5a	0.447004	0.373718	0.526045	0.67564	0.530254	0.515282	0.419824	-0.104661	0.172	0.188	1
Stag2	0.955312	1.06816	1.04294	1.00451	1.23556	1.19156	0.514881	-0.104335	0.355	0.358	1
Alkbh5	0.249554	0.387219	0.385637	0.356121	0.351585	0.650135	0.21566	-0.104308	0.142	0.166	1
Supt20	0.325044	0.217911	0.357251	0.421009	0.379093	0.393067	0.420359	-0.10387	0.131	0.145	1
Ccdc88a	0.608156	0.652794	0.727805	0.654485	0.85816	0.755439	0.452018	-0.103829	0.245	0.256	1
Krcc1	0.769122	0.864375	0.976685	0.767821	1.07775	1.0525	0.306007	-0.10381	0.314	0.333	1
Ndufa7	3.57954	3.17441	3.69583	3.7519	3.77273	3.85156	0.138908	-0.102959	0.757	0.763	1
Stx16	0.784907	1.04956	0.627648	1.22151	0.996519	0.777045	0.375293	-0.102856	0.284	0.305	1
Fxr1	0.683178	1.12421	0.625277	0.989426	0.988934	0.918315	0.276743	-0.102797	0.304	0.325	1
Wdr33	0.544332	0.714789	0.618993	0.607246	0.796223	0.773039	0.589366	-0.102668	0.253	0.254	1
Zc3h15	0.60955	0.920751	0.697943	0.820104	0.853293	0.974045	0.221127	-0.102497	0.268	0.297	1
Lrrc8c	0.100885	0.281513	0.153072	0.352157	0.241087	0.275463	0.0326043	-0.102172	0.066	0.102	1
Sik2	0.334656	0.321241	0.449381	0.570883	0.367738	0.55905	0.834619	-0.10194	0.149	0.147	1
Cd180	0.299889	0.37233	0.367431	0.453402	0.386926	0.539688	0.395354	-0.101704	0.137	0.153	1
Secisbp2l	0.404823	0.492122	0.433729	0.361459	0.606562	0.583371	0.450602	-0.101695	0.192	0.202	1
AU020206	0.248002	0.279685	0.237604	0.29725	0.400723	0.296362	0.254529	-0.101639	0.106	0.127	1
Eif4ebp2	0.584941	0.625293	0.626921	0.753086	0.71391	0.74576	0.130439	-0.101583	0.226	0.264	1
Gpcpd1	0.825252	0.819497	0.892809	1.15582	0.967018	0.891373	0.265816	-0.10157	0.284	0.307	1
Atf4	1.99922	1.92494	1.60033	2.44739	1.80047	2.20925	0.384308	-0.101561	0.504	0.515	1
Snx6	2.77117	2.07184	2.21165	2.43827	2.79588	2.2932	0.394914	-0.101524	0.618	0.603	1
Junos	0.277836	0.402103	0.326325	0.556783	0.35754	0.493265	0.0853135	-0.101321	0.124	0.16	1
Tnfaip2	0.537947	1.03855	0.445196	0.639284	0.802941	0.959541	0.977114	-0.100954	0.231	0.223	1
Sirpa	2.61376	2.55359	2.3036	3.18943	2.68765	2.56688	0.479198	-0.100927	0.626	0.626	1
Ell2	0.153597	0.238399	0.271681	0.369128	0.389165	0.154628	0.197557	-0.10083	0.088	0.11	1
Pdcd4	0.534028	0.653203	0.745841	0.781068	0.612214	1.00046	0.637516	-0.100762	0.238	0.241	1
Ago3	0.823871	0.583581	0.712002	1.13373	0.805682	0.652246	0.420905	-0.100684	0.253	0.266	1
Fus	1.52317	1.30423	1.35346	1.49073	1.45192	1.76894	0.285124	-0.100633	0.433	0.454	1
Ap3b1	0.792682	0.693337	0.764094	0.917315	0.799333	0.959383	0.110815	-0.100439	0.276	0.315	1
Thoc7	0.436633	0.543535	0.497961	0.708494	0.509382	0.692293	0.178224	-0.100331	0.19	0.219	1
Dusp1	3.60691	3.89494	4.01193	3.75268	3.3939	5.73195	0.858124	-0.100328	0.691	0.665	1
Anxa4	0.541443	0.739551	0.789599	0.999278	0.689463	0.910993	0.0362302	-0.100274	0.241	0.295	1
BC005624	0.481879	0.76711	0.474299	0.698438	0.730547	0.657508	0.387921	-0.100189	0.22	0.239	1
Higd1a	0.838794	0.621485	0.873529	0.991912	0.830429	0.937592	0.329262	-0.100112	0.284	0.309	1
Plcg2	0.454393	0.42454	0.199174	0.598924	0.476757	0.3474	0.244702	-0.100035	0.15	0.174	1
Ddx50	0.249577	0.350246	0.414745	0.618667	0.39723	0.388523	0.373996	-0.0999632	0.142	0.159	1
Gm26510	0.282942	0.269886	0.397987	0.409141	0.369837	0.471056	0.0477015	-0.099928	0.122	0.164	1
Bmp2	0.3088	0.23564	0.263144	0.306399	0.326133	0.437715	0.210649	-0.0998698	0.094	0.114	1
Saraf	1.23533	1.31755	1.27386	1.84272	1.32394	1.38622	0.390278	-0.0997743	0.43	0.436	1
Agps	0.488862	0.573089	0.485542	0.736062	0.60098	0.606223	0.29303	-0.099563	0.21	0.231	1
Ntan1	0.631504	0.435422	0.608118	0.647958	0.694515	0.613621	0.2814	-0.0993816	0.223	0.245	1
Nup98	0.331192	0.343349	0.264725	0.409546	0.345371	0.507381	0.300368	-0.0993214	0.137	0.157	1
Iqgap2	1.5622	1.86497	1.62496	2.39274	2.00281	1.40253	0.408782	-0.0992449	0.501	0.489	1
Arpp19	1.78309	1.67025	1.96556	1.65736	2.06533	2.0965	0.131305	-0.0991325	0.559	0.568	1
Ifi27	1.61905	1.41336	1.5574	2.17178	1.43166	1.84132	0.578006	-0.0988857	0.436	0.452	1
Clk1	1.98463	3.01605	2.22891	2.18918	2.71727	2.97543	0.266697	-0.0988558	0.597	0.605	1
Srsf2	2.1567	1.73008	1.9497	2.54765	2.04832	2.02792	0.522548	-0.0987561	0.506	0.511	1
Snrpf	1.12656	1.15529	0.894761	0.970404	1.13706	1.46908	0.124526	-0.0985577	0.347	0.386	1
Lims1	1.12802	0.98156	1.11612	1.41121	1.2475	1.04393	0.356373	-0.0984146	0.355	0.378	1
Lamc1	0.319958	0.439482	0.208594	0.378224	0.391264	0.501658	0.386793	-0.098223	0.126	0.139	1
Gm31243	0.223136	0.339478	0.28104	0.300498	0.421132	0.350824	0.0565264	-0.0982176	0.102	0.141	1
Sp100	0.691473	0.884747	0.88857	0.915277	0.931737	1.01956	0.145551	-0.0981122	0.294	0.327	1
Crebbp	1.14082	1.3873	1.13345	1.28544	1.4852	1.29838	0.134319	-0.0980916	0.38	0.411	1
Midn	0.455198	0.467748	0.695213	0.600741	0.698671	0.584767	0.184351	-0.0979138	0.203	0.233	1
Zfp622	0.262065	0.229843	0.244878	0.318262	0.3441	0.319868	0.0651428	-0.097736	0.096	0.131	1
Vps13d	0.539563	0.337215	0.170179	0.371113	0.499815	0.384832	0.190224	-0.0976981	0.129	0.155	1
Mrpl40	0.201444	0.252484	0.20155	0.383557	0.255551	0.339807	0.0740072	-0.0975869	0.098	0.131	1
Mtr	0.346721	0.506277	0.262287	0.400733	0.485054	0.509436	0.513581	-0.0975029	0.155	0.168	1
Gdi1	0.520933	0.60695	0.584966	0.706174	0.603472	0.797494	0.705595	-0.0972894	0.228	0.231	1
Cited2	1.36157	1.54193	1.87772	2.27842	1.55328	1.82291	0.966661	-0.0972158	0.423	0.405	1
Rps25	6.84516	7.65307	7.55743	8.06991	8.42739	7.15805	0.0617277	-0.0971971	0.911	0.92	1
Chn2	0.239006	0.237045	0.281471	0.496306	0.275929	0.343535	0.144954	-0.0970641	0.096	0.123	1
Kif13a	0.532278	0.424103	0.389188	0.685984	0.463659	0.592777	0.372971	-0.0970568	0.17	0.188	1
Prkn	2.06717	1.75903	2.30335	2.4323	2.17968	2.20771	0.30479	-0.0970422	0.479	0.487	1
Prkx	0.151533	0.263295	0.319707	0.254849	0.386839	0.298837	0.141966	-0.096984	0.099	0.125	1
E330020D12Rik	0.669281	0.558556	0.612376	0.701077	0.629171	0.878814	0.763913	-0.0968771	0.208	0.211	1
Gm37305	0.275045	0.255384	0.195347	0.358555	0.282578	0.382564	0.00928191	-0.0967154	0.088	0.139	1
Fbxo30	0.343831	0.191473	0.341952	0.480683	0.297435	0.433014	0.0807	-0.0966873	0.104	0.139	1
Rbm22	0.335323	0.525066	0.56198	0.298473	0.670325	0.613574	0.233213	-0.0966621	0.183	0.215	1
Insig2	0.344431	0.441134	0.394406	0.523374	0.47969	0.497823	0.411526	-0.0965439	0.162	0.176	1
Siglece	0.46011	0.539699	0.376462	0.587174	0.484582	0.678526	0.384935	-0.096489	0.193	0.209	1
Mrpl33	1.76304	1.32544	1.84258	1.37082	1.97315	1.79802	0.374752	-0.0963784	0.514	0.515	1
Slc4a7	0.408543	0.423528	0.267778	0.40719	0.441481	0.532891	0.0936049	-0.0960656	0.147	0.184	1
Tnks	0.329701	0.280239	0.361337	0.478788	0.344988	0.477985	0.132165	-0.0960621	0.124	0.157	1
Msi2	0.499569	0.278121	0.47706	0.548922	0.474559	0.528367	0.337865	-0.0960358	0.169	0.188	1
Kmt5c	0.135254	0.150744	0.286464	0.342721	0.287886	0.201258	0.0791723	-0.095979	0.071	0.1	1
Gcc2	0.21594	0.312046	0.408486	0.344942	0.41909	0.415704	0.111378	-0.0958157	0.119	0.151	1
Dhrs1	0.62444	0.271875	0.378212	0.677945	0.454714	0.493899	0.424474	-0.0957443	0.17	0.186	1
Trpc4ap	0.693048	0.482453	0.406491	0.475867	0.586896	0.780135	0.173699	-0.0957227	0.203	0.237	1
Wdr43	0.200833	0.293859	0.250499	0.247279	0.381028	0.321664	0.112677	-0.0949493	0.107	0.137	1
Mbd5	0.69897	0.754343	0.609611	0.885263	0.774114	0.809402	0.0641546	-0.0947691	0.223	0.272	1
Arl3	0.500602	0.376909	0.392452	0.587123	0.44558	0.583428	0.34288	-0.0947375	0.177	0.196	1
Arl15	1.01744	1.21782	1.00106	1.58751	1.13512	1.16306	0.527663	-0.0947148	0.294	0.305	1
Snrpb2	0.980431	1.11801	0.996613	1.02527	1.15514	1.29971	0.0565189	-0.0945942	0.349	0.397	1
Lactb2	0.182431	0.279226	0.16226	0.333631	0.255471	0.333118	0.06057	-0.0943838	0.084	0.117	1
Arhgap17	0.903462	1.44086	1.06471	1.40265	1.15747	1.47757	0.220282	-0.0943813	0.388	0.407	1
Rfc2	0.400007	0.333591	0.383131	0.528315	0.527745	0.317589	0.558297	-0.0943608	0.149	0.16	1
Cdc37	1.08437	1.32197	1.04554	1.29204	1.39308	1.1821	0.768976	-0.0942325	0.423	0.415	1
Rab8b	3.29834	3.46878	3.18068	3.81947	3.91202	3.02633	0.318732	-0.0941894	0.737	0.724	1
Gm36198	0.20895	0.285264	0.234879	0.474942	0.311645	0.271564	0.154496	-0.0940985	0.094	0.119	1
Pdlim5	1.73233	1.76922	1.43721	2.01371	1.75994	1.83237	0.742362	-0.0940416	0.478	0.474	1
Eno1	0.632609	0.425702	0.835096	0.754757	0.757515	0.664677	0.343902	-0.0940364	0.246	0.266	1
Rpain	0.433106	0.359472	0.322692	0.439463	0.411102	0.557209	0.119348	-0.0939853	0.15	0.182	1
Lrrk1	0.499995	0.383761	0.377519	0.671861	0.496126	0.441151	0.0816813	-0.0939508	0.157	0.198	1
Pgap2	0.3035	0.308196	0.341749	0.42745	0.376937	0.439537	0.29993	-0.0939462	0.129	0.149	1
Usp16	0.305051	0.42167	0.380292	0.245443	0.407091	0.691757	0.22191	-0.0938939	0.162	0.186	1
Epc1	0.622164	0.713009	0.677444	0.794494	0.892048	0.614751	0.770955	-0.0938427	0.251	0.25	1
Prpf6	0.385906	0.236332	0.271186	0.37248	0.401003	0.349319	0.0932067	-0.0936663	0.116	0.151	1
Gtpbp2	0.417629	0.310724	0.298352	0.521694	0.410922	0.401303	0.4279	-0.0936644	0.142	0.157	1
Ivns1abp	1.02769	0.888991	0.991772	0.873742	1.11925	1.19188	0.383818	-0.0936161	0.332	0.352	1
Micos10	2.15468	1.42208	1.65754	1.94748	1.92315	1.83736	0.296251	-0.093539	0.516	0.532	1
Nsrp1	0.287774	0.477536	0.443447	0.378943	0.563545	0.484144	0.236844	-0.0935209	0.159	0.182	1
Stxbp6	0.864364	0.732495	0.852265	1.09071	0.810912	1.02746	0.679948	-0.0935066	0.256	0.258	1
Arhgap15	4.24802	5.19834	5.4285	5.86016	5.46559	4.96756	0.303359	-0.0934001	0.775	0.781	1
Myo18a	0.330136	0.317319	0.345762	0.398902	0.456493	0.372199	0.35608	-0.0933265	0.136	0.153	1
Cant1	0.294873	0.298119	0.238997	0.300601	0.454323	0.258089	0.117284	-0.0933262	0.117	0.149	1
Vps52	0.182514	0.241954	0.170111	0.312105	0.353851	0.14741	0.141063	-0.0932914	0.086	0.112	1
Tut4	0.987142	0.808524	1.04792	1.01656	1.00455	1.20113	0.809443	-0.0932467	0.35	0.344	1
Pola1	0.37883	0.290669	0.228253	0.291813	0.456538	0.324496	0.299871	-0.0931156	0.124	0.143	1
Sos2	0.397779	0.254853	0.23115	0.40562	0.325174	0.439677	0.624039	-0.0928349	0.121	0.127	1
Rcn2	0.210037	0.229751	0.3598	0.389957	0.316052	0.377551	0.0661705	-0.0927999	0.101	0.135	1
Bicd2	0.287302	0.26056	0.26908	0.4941	0.305556	0.35171	0.0307878	-0.0927612	0.107	0.153	1
Crip1	20.8418	23.1644	22.2777	26.1029	25.2335	19.8658	0.554635	-0.0927325	0.942	0.924	1
Gimap6	0.299376	0.243532	0.31793	0.452017	0.343713	0.359573	0.516501	-0.092551	0.107	0.117	1
Jak1	2.41655	2.73365	2.18949	3.22	2.65572	2.43394	0.251987	-0.0924477	0.628	0.64	1
Hnrnpdl	0.77435	0.70319	0.673306	0.842266	0.764914	0.921086	0.677246	-0.0922969	0.261	0.264	1
Azi2	0.457593	0.4507	0.423223	0.477979	0.485344	0.662384	0.557786	-0.0922588	0.185	0.192	1
Zfp1	0.219208	0.191844	0.270253	0.397419	0.265288	0.315284	0.364648	-0.0922416	0.093	0.108	1
Ddx24	0.761864	1.10376	1.07553	1.33232	1.08149	1.06083	0.185858	-0.092117	0.329	0.364	1
Arnt	0.334939	0.371141	0.455075	0.592754	0.407215	0.521839	0.587035	-0.0920305	0.165	0.172	1
Rtn3	1.55801	1.69117	1.47352	1.85393	1.72564	1.73031	0.718959	-0.0920083	0.469	0.47	1
Gm40645	0.192934	0.263734	0.240661	0.268649	0.312325	0.351178	0.243162	-0.091916	0.093	0.114	1
Arhgap1	0.291538	0.249173	0.320397	0.411463	0.395991	0.299813	0.067838	-0.0914843	0.119	0.157	1
Lonp2	0.260928	0.278585	0.257367	0.413463	0.335415	0.33248	0.109563	-0.0914045	0.111	0.141	1
Snx18	0.546307	0.661774	0.545539	0.951472	0.618538	0.65575	0.305245	-0.0910971	0.215	0.241	1
Sf3a2	0.220356	0.233914	0.243389	0.308641	0.347081	0.261991	0.254702	-0.0910419	0.106	0.123	1
Adcy7	1.16156	0.803472	1.06788	1.03528	1.18201	1.09208	0.24378	-0.0909298	0.337	0.36	1
Snrnp27	0.549878	0.997463	0.440854	0.548766	0.818142	0.904618	0.461978	-0.0909146	0.266	0.278	1
3110082I17Rik	0.605299	0.397427	0.56308	0.591436	0.508143	0.787292	0.707622	-0.0907241	0.188	0.19	1
Ahcyl2	0.363721	0.44725	0.475609	0.53608	0.431517	0.662577	0.422872	-0.0905363	0.162	0.178	1
mt-Co1	41.1996	44.0808	45.7422	48.3701	47.3845	44.384	0.00200988	-0.0903909	0.998	0.998	1
Zfp280d	0.265035	0.295737	0.226791	0.553334	0.333299	0.240643	0.182244	-0.0902204	0.099	0.123	1
Bdp1	0.207832	0.324293	0.342561	0.280431	0.423052	0.366946	0.21638	-0.0901732	0.127	0.149	1
Ctr9	0.166722	0.260471	0.171746	0.352033	0.2276	0.32409	0.087121	-0.0901494	0.086	0.115	1
Nfam1	1.12574	0.980137	1.14389	1.44379	1.21477	1.06137	0.363823	-0.0900893	0.372	0.386	1
Abcd3	0.219137	0.300714	0.281933	0.272642	0.463784	0.222234	0.312088	-0.0900725	0.114	0.133	1
Jmjd1c	2.03981	2.27807	1.83911	2.42856	2.11411	2.39989	0.11461	-0.0899806	0.534	0.55	1
Eps15l1	0.294137	0.158914	0.164752	0.195682	0.348437	0.219152	0.0849081	-0.0899201	0.083	0.114	1
Rdm1	0.483162	0.394386	0.49541	0.327207	0.661529	0.4981	0.42578	-0.089878	0.164	0.18	1
Asb3	0.185955	0.183794	0.215421	0.265902	0.275473	0.268005	0.330601	-0.089873	0.084	0.1	1
4931406C07Rik	0.322755	0.314814	0.294751	0.42799	0.319897	0.493461	0.18062	-0.0895526	0.127	0.155	1
Csnk2a1	0.731763	0.850123	0.891929	0.818268	0.849374	1.17193	0.448046	-0.0893778	0.306	0.319	1
Ccnd3	2.25356	2.67784	2.56464	2.11489	2.61717	3.30692	0.941631	-0.0893219	0.592	0.577	1
Cttnbp2nl	1.17766	1.2827	1.14065	1.40117	1.25296	1.46165	0.770167	-0.0892937	0.385	0.38	1
Rpl36	21.4081	20.0855	21.4475	22.0044	22.7339	21.8373	0.0181017	-0.0889862	0.988	0.984	1
Rgs19	0.695651	0.450017	0.578263	0.974755	0.55675	0.647986	0.491726	-0.0888592	0.23	0.243	1
Rapgef1	0.161157	0.199935	0.276298	0.233235	0.295116	0.31467	0.138228	-0.0887403	0.089	0.115	1
Xrcc4	0.488767	0.313691	0.424489	0.415182	0.471776	0.567028	0.205242	-0.0886631	0.137	0.164	1
Tmem222	0.403477	0.180978	0.243133	0.556767	0.321988	0.264119	0.330352	-0.0886093	0.114	0.131	1
AY036118	0.795882	0.767147	1.0825	0.829548	0.770939	1.45186	0.553326	-0.0885852	0.207	0.219	1
2310001H17Rik	0.638462	0.636617	0.513939	0.537881	0.644083	0.884067	0.170917	-0.0884373	0.21	0.245	1
Acss1	0.175714	0.177041	0.231752	0.310328	0.32839	0.151482	0.0785513	-0.0884242	0.086	0.117	1
Nlrc4	0.397979	0.437075	0.329543	0.600258	0.552263	0.288165	0.363814	-0.0882448	0.159	0.176	1
Bcl2l11	0.266395	0.351613	0.420125	0.616414	0.331467	0.481832	0.261635	-0.0881825	0.134	0.157	1
Tsen34	0.920442	0.679957	0.704358	0.952235	0.705509	1.08541	0.682817	-0.0880652	0.296	0.292	1
Ndufb4	1.28662	1.2283	1.32398	1.19436	1.57433	1.31099	0.257374	-0.0880641	0.438	0.456	1
Tmcc1	5.05921	4.70687	6.62389	7.04524	5.11871	6.21987	0.222905	-0.0880223	0.78	0.796	1
Rps15a	23.353	19.9862	22.9823	22.2659	23.6082	23.7691	0.0230807	-0.0879576	0.985	0.988	1
Slx4ip	0.355769	0.488752	0.282743	0.610751	0.384281	0.519703	0.298773	-0.087893	0.149	0.168	1
Thap8	0.298435	0.325998	0.2349	0.120472	0.320336	0.59843	0.0980438	-0.0878146	0.099	0.131	1
Zfand5	3.82851	3.27916	3.15653	2.92026	3.61506	4.24971	0.612425	-0.0875528	0.721	0.665	1
Ube4b	0.505105	0.250355	0.270988	0.278219	0.487606	0.389515	0.0963771	-0.0872364	0.134	0.168	1
Lilr4b	1.44136	1.47202	1.18074	1.34165	1.47512	1.69129	0.624758	-0.0871932	0.393	0.393	1
Csnk1g3	0.710677	0.510902	0.575832	0.666464	0.639334	0.788616	0.269558	-0.0871901	0.225	0.247	1
Gm30382	0.182896	0.291786	0.434931	0.413337	0.301309	0.502683	0.179849	-0.0870271	0.089	0.114	1
Ifitm2	12.0354	10.8837	11.5448	11.0465	13.0533	11.5967	0.155378	-0.0869838	0.959	0.963	1
C87436	0.230371	0.376214	0.245651	0.449028	0.373944	0.317891	0.355915	-0.0869827	0.124	0.141	1
Spcs3	0.331048	0.345466	0.353153	0.298319	0.434272	0.493521	0.956595	-0.0869441	0.155	0.151	1
Mecp2	0.414177	0.54037	0.491987	0.764392	0.45618	0.661545	0.527367	-0.0868236	0.175	0.186	1
BC029722	0.239791	0.149503	0.150711	0.316605	0.303279	0.125731	0.116017	-0.0868198	0.081	0.108	1
Acp1	0.585786	0.37973	0.500201	0.607008	0.495002	0.673916	0.46221	-0.0867872	0.205	0.215	1
Pirb	0.971457	0.91995	1.02934	0.786405	1.44203	0.723479	0.52643	-0.0867824	0.342	0.307	1
Bicra	0.22536	0.370112	0.265853	0.50251	0.320848	0.37774	0.130238	-0.0866867	0.114	0.145	1
Impdh2	0.415056	0.385784	0.457403	0.516208	0.532315	0.455463	0.239292	-0.086616	0.164	0.188	1
Trf	13.2107	11.6188	12.7957	14.0696	13.2866	12.8843	0.123108	-0.0865852	0.965	0.963	1
Stxbp5	0.474285	0.265447	0.397726	0.484368	0.375597	0.565137	0.486287	-0.0865725	0.165	0.176	1
Eif1a	0.697304	0.858019	0.789572	0.837143	0.963334	0.83078	0.716372	-0.0863854	0.293	0.284	1
Mfap1a	0.224683	0.409449	0.309833	0.292845	0.448128	0.398813	0.10973	-0.0862461	0.121	0.151	1
Rftn1	0.849788	1.10149	1.12489	0.976687	1.33497	0.986906	0.245509	-0.0861979	0.349	0.386	1
Uimc1	0.224481	0.44526	0.221988	0.188267	0.418372	0.459926	0.454816	-0.0861607	0.131	0.143	1
Hspd1	0.792574	0.908209	0.650308	1.12152	0.783028	0.954674	0.570554	-0.0860468	0.279	0.29	1
Adgrg6	0.500847	0.698838	0.522338	0.649342	0.676603	0.703182	0.709839	-0.0859095	0.202	0.207	1
Man1b1	0.107161	0.212112	0.1853	0.285579	0.237461	0.227757	0.0674789	-0.0857297	0.076	0.108	1
Iigp1	0.22005	0.599602	0.130184	0.1703	0.546568	0.359832	0.0788761	-0.0856175	0.073	0.104	1
Shoc2	0.633719	0.495373	0.751976	0.554337	0.773525	0.728707	0.482414	-0.0854604	0.233	0.249	1
Frs2	0.312235	0.243937	0.206644	0.423399	0.263736	0.375565	0.380306	-0.0853651	0.107	0.123	1
Wdfy4	0.550238	0.390547	0.46502	0.482697	0.604217	0.510297	0.319216	-0.0853458	0.179	0.2	1
Dlg1	0.373061	0.420886	0.478169	0.378661	0.657676	0.359959	0.608245	-0.0853232	0.174	0.182	1
Pcf11	0.379432	0.590921	0.572696	0.498036	0.607138	0.694501	0.384872	-0.0852966	0.197	0.211	1
Setd5	0.394976	0.517854	0.368299	0.544403	0.638761	0.317065	0.463315	-0.0851726	0.169	0.184	1
Med10	0.674418	0.478191	0.47532	0.720313	0.534366	0.726916	0.425762	-0.0850603	0.215	0.231	1
Tax1bp3	0.620467	0.463921	0.496848	0.704166	0.526309	0.698829	0.872179	-0.0849631	0.235	0.227	1
Fchsd2	1.07972	0.817546	1.06019	1.56963	1.04358	0.885233	0.849681	-0.0848542	0.322	0.323	1
Snx30	0.877985	0.888251	0.894768	0.923358	1.01222	1.03117	0.258499	-0.0846595	0.302	0.333	1
Arhgap22	1.11953	0.984726	0.779585	1.53188	0.89902	1.08728	0.271561	-0.0843681	0.298	0.329	1
Spg21	0.911409	0.815824	0.7942	1.05679	1.08094	0.672221	0.178367	-0.0842676	0.294	0.335	1
Mrps18c	0.522906	0.399326	0.523642	0.856442	0.561361	0.394491	0.415266	-0.0842296	0.19	0.207	1
Gm30198	0.300519	0.507554	0.248599	0.298743	0.476195	0.481656	0.209517	-0.0842235	0.111	0.135	1
Cysltr1	1.12763	0.572608	0.765518	0.719891	0.946012	0.968636	0.0993338	-0.0840785	0.263	0.307	1
Stk3	0.802873	0.764325	0.585796	0.986676	0.784942	0.781426	0.293884	-0.0840328	0.255	0.274	1
Slc25a45	0.253742	0.223717	0.213656	0.251981	0.352959	0.255627	0.264221	-0.0840094	0.099	0.117	1
Ywhaz	2.05423	2.3505	2.32059	2.44252	2.43033	2.47323	0.149138	-0.0839181	0.612	0.632	1
Dok1	0.24591	0.368844	0.257919	0.43592	0.359238	0.359474	0.590381	-0.0838738	0.126	0.133	1
Trib1	0.367774	0.320816	0.222506	0.546073	0.305119	0.403497	0.186827	-0.0838381	0.122	0.149	1
Fem1c	0.347101	0.305415	0.337962	0.302397	0.417866	0.45592	0.489058	-0.0838091	0.136	0.147	1
Rngtt	0.295526	0.353035	0.373007	0.460455	0.384893	0.458265	0.324462	-0.0837383	0.139	0.159	1
Mgat4a	0.619376	0.554638	0.342776	0.49314	0.552747	0.728596	0.340438	-0.0835764	0.2	0.221	1
Phc3	0.188884	0.16796	0.439262	0.328853	0.325864	0.356499	0.129185	-0.083564	0.106	0.135	1
Zbtb4	0.456868	0.364225	0.367515	0.725031	0.413946	0.424698	0.547578	-0.0835453	0.162	0.172	1
Tsc2	0.196378	0.186113	0.107042	0.324153	0.20023	0.230732	0.0562724	-0.0834454	0.071	0.104	1
Ltv1	0.288436	0.422076	0.189032	0.351762	0.338865	0.478705	0.401045	-0.0833879	0.126	0.139	1
C3ar1	3.95814	5.28609	3.93281	4.56179	4.62232	5.15271	0.794053	-0.083323	0.79	0.781	1
Itpk1	0.142898	0.215304	0.128055	0.277476	0.210006	0.248308	0.0802446	-0.0832494	0.073	0.102	1
Ckb	2.11633	1.66083	1.55839	2.6299	1.78067	1.74315	0.547495	-0.083198	0.464	0.46	1
Bend6	0.212551	0.168749	0.207453	0.241756	0.321623	0.189622	0.0393378	-0.0830673	0.071	0.108	1
Cpd	0.27745	0.376876	0.246353	0.336234	0.400918	0.380665	0.605921	-0.0828378	0.137	0.143	1
Creld2	0.223519	0.307321	0.094126	0.367563	0.277289	0.249437	0.36508	-0.0828367	0.094	0.11	1
Ints12	0.163996	0.239784	0.102026	0.297022	0.229752	0.228793	0.111822	-0.0828253	0.079	0.106	1
Nkap	0.221785	0.293247	0.211293	0.273116	0.333662	0.323488	0.172395	-0.082716	0.104	0.129	1
Stk25	0.377314	0.228324	0.283793	0.251309	0.282018	0.572187	0.259213	-0.0824751	0.112	0.135	1
Supt5	0.570377	0.894154	0.580441	0.804363	0.832243	0.732937	0.112298	-0.0824161	0.248	0.288	1
Celf2	2.8348	3.17096	2.90598	3.31104	3.15514	3.26442	0.167141	-0.0823957	0.673	0.703	1
Sec61b	3.43817	2.83724	2.72951	3.44859	3.111	3.24977	0.267549	-0.082293	0.698	0.714	1
Cyfip1	1.99341	2.16638	1.94146	2.21024	1.98639	2.59821	0.120595	-0.0820941	0.542	0.573	1
Ppp2r1a	0.686856	0.597816	0.518656	0.766636	0.520105	0.922589	0.536793	-0.0819002	0.241	0.247	1
Mgmt	0.406824	0.295724	0.30615	0.521726	0.310063	0.502232	0.841438	-0.0818128	0.144	0.135	1
Spag9	0.810448	1.23052	1.08311	1.23922	1.20443	1.09387	0.935936	-0.0818106	0.372	0.35	1
Zdhhc9	0.274438	0.331435	0.349979	0.293969	0.354887	0.526293	0.103599	-0.0816658	0.122	0.155	1
Psmc6	0.654198	0.730026	0.685171	0.594387	0.704799	1.04791	0.749779	-0.0815904	0.273	0.272	1
Nsmce1	0.481053	0.495751	0.651855	1.0412	0.604787	0.423081	0.200589	-0.0815574	0.215	0.243	1
Atf7	0.606342	0.848809	0.676437	0.852677	0.859973	0.738297	0.32686	-0.0815157	0.248	0.274	1
Disc1	0.366113	0.361263	0.38628	0.653316	0.476395	0.285867	0.595015	-0.0814496	0.154	0.162	1
Cass4	0.470993	0.505339	0.7372	1.26542	0.553088	0.462708	0.349804	-0.0814212	0.193	0.207	1
Tmbim6	2.38236	2.34329	2.06519	2.25488	2.3128	2.80479	0.235577	-0.0813457	0.633	0.626	1
Tmem106a	1.73467	1.68433	1.58547	1.89637	2.05433	1.41043	0.432645	-0.0813247	0.486	0.485	1
Batf3	0.392005	0.33575	0.358886	0.529005	0.537898	0.226984	0.524354	-0.081163	0.134	0.147	1
Tfe3	0.469821	0.605242	0.717439	0.895961	0.586548	0.737779	0.261384	-0.0811338	0.23	0.254	1
Rbm25	1.10597	1.31648	1.05434	1.36899	1.33224	1.18913	0.217936	-0.080973	0.385	0.409	1
Gkap1	0.457707	0.508364	0.39346	0.549043	0.466459	0.652465	0.63036	-0.0808901	0.177	0.18	1
Kdm3a	0.281124	0.335487	0.364105	0.329372	0.375496	0.496639	0.163895	-0.0807908	0.131	0.159	1
Smim15	1.01204	0.682061	0.69552	0.676517	1.11901	0.6528	0.163551	-0.0807871	0.296	0.329	1
Sbno2	0.528804	0.644227	0.524922	0.904834	0.658641	0.518654	0.76568	-0.080606	0.215	0.213	1
Map3k14	0.274686	0.257085	0.24016	0.343485	0.352228	0.283167	0.196186	-0.0802848	0.102	0.127	1
Hdac3	0.195106	0.121691	0.203078	0.284906	0.219767	0.234194	0.0695152	-0.0800999	0.069	0.1	1
Lcor	0.715193	0.537417	0.558969	0.814135	0.650913	0.674524	0.480563	-0.0800895	0.225	0.239	1
Gabbr1	0.403548	0.327382	0.307832	0.393363	0.442426	0.403359	0.796199	-0.0800543	0.132	0.135	1
Cnp	0.425181	0.3544	0.440518	0.535281	0.515885	0.399468	0.375142	-0.0798254	0.172	0.188	1
Rpl30	25.8411	20.0381	25.1027	22.9757	24.988	25.5928	0.0212871	-0.0796986	0.987	0.99	1
Aak1	0.464339	0.390153	0.496742	0.641693	0.543948	0.435692	0.575642	-0.0795551	0.159	0.17	1
Tnfrsf13b	0.436953	0.364225	0.548626	0.353033	0.491751	0.688311	0.29242	-0.079548	0.172	0.194	1
Ncoa3	1.11528	1.22065	1.36133	1.737	1.16949	1.43445	0.517347	-0.0794887	0.41	0.409	1
1810026B05Rik	0.299094	0.1709	0.222665	0.241698	0.212436	0.459899	0.320972	-0.0792983	0.093	0.11	1
Id3	0.333244	0.291432	0.272854	0.0994477	0.580827	0.203853	0.80598	-0.0792048	0.114	0.119	1
Dusp11	0.570514	0.55629	0.57413	0.643379	0.568253	0.798563	0.274737	-0.0791599	0.213	0.239	1
Msr1	1.73207	1.38932	1.15192	1.29624	1.6971	1.48161	0.266803	-0.0791232	0.425	0.454	1
Dnajb6	1.45257	1.63507	1.47373	1.77956	1.68244	1.58669	0.345805	-0.0790985	0.463	0.493	1
Mat2a	2.70386	2.48996	3.08986	3.80515	2.91309	2.51143	0.76033	-0.0789188	0.643	0.638	1
Nhlrc2	0.279293	0.329628	0.221996	0.474021	0.295435	0.36781	0.506893	-0.0788716	0.121	0.133	1
Rnf111	0.648264	0.582356	0.39955	0.559177	0.571118	0.768417	0.654223	-0.0787784	0.218	0.223	1
Ric8b	0.175007	0.253416	0.224244	0.23381	0.344831	0.233397	0.102188	-0.0787562	0.084	0.114	1
Ube2e2	0.456259	0.309914	0.395421	0.657557	0.326342	0.549063	0.835497	-0.0787401	0.127	0.121	1
Map3k7	0.422238	0.23248	0.339143	0.501463	0.363954	0.389776	0.422002	-0.0787117	0.137	0.151	1
Eif3l	0.263292	0.423424	0.469172	0.595821	0.386344	0.518396	0.200548	-0.0786658	0.152	0.178	1
Hmox2	1.8356	1.69835	1.51997	2.06532	1.65498	1.97448	0.164787	-0.0784593	0.504	0.552	1
Tbc1d20	0.231824	0.455814	0.273208	0.325736	0.441775	0.391652	0.603592	-0.0783792	0.14	0.147	1
Cfl1	7.91088	6.74426	7.53628	7.69521	7.44329	8.48028	0.398837	-0.0783502	0.889	0.906	1
Gps2	0.942464	1.7894	1.2225	1.27776	1.66227	1.32473	0.411217	-0.0783128	0.412	0.44	1
Slc30a7	0.245729	0.309042	0.33391	0.340325	0.378117	0.375446	0.733512	-0.0781927	0.131	0.135	1
Cabin1	0.32367	0.271411	0.352143	0.262848	0.371953	0.483118	0.440424	-0.0781421	0.129	0.143	1
Wdr45b	0.442519	0.835108	0.708125	1.0979	0.65243	0.754934	0.231638	-0.0781117	0.248	0.282	1
Thumpd3	0.156917	0.168576	0.215123	0.358777	0.166501	0.302349	0.204139	-0.0781033	0.079	0.1	1
Nkiras2	0.372369	0.325543	0.240534	0.578725	0.315431	0.379815	0.48246	-0.078065	0.132	0.145	1
Limd1	0.452558	0.51431	0.535245	0.56954	0.556747	0.641706	0.483378	-0.0780081	0.202	0.217	1
Basp1	1.29649	1.13783	0.850352	1.03353	1.34995	1.09607	0.149503	-0.0779639	0.289	0.325	1
Vps72	0.41756	0.282649	0.455619	0.424825	0.50914	0.387709	0.335928	-0.0778906	0.15	0.17	1
Zswim6	3.64112	3.1929	3.79848	5.23894	3.17063	3.83828	0.452456	-0.0778299	0.712	0.695	1
Fam107b	0.191536	0.249805	0.170376	0.28406	0.231226	0.334434	0.264185	-0.0776432	0.088	0.108	1
Vps18	0.261885	0.190757	0.117284	0.341494	0.206866	0.277395	0.187952	-0.0775719	0.083	0.106	1
Glb1	0.349195	0.54669	0.442917	0.414098	0.509994	0.645171	0.357386	-0.0775318	0.183	0.202	1
Kctd12	3.19409	3.25857	3.81926	3.20891	3.95164	3.47546	0.243237	-0.0774397	0.717	0.728	1
Utp11	0.545311	0.703965	0.566935	0.733447	0.642751	0.774155	0.333222	-0.0773917	0.241	0.262	1
4732471J01Rik	0.224616	0.38492	0.311878	0.43146	0.338993	0.431316	0.427895	-0.0773474	0.129	0.143	1
Phf1	0.19964	0.281898	0.282993	0.283272	0.329033	0.348741	0.461972	-0.0772385	0.104	0.115	1
Ubr2	0.42842	0.538937	0.577022	0.469813	0.622194	0.64692	0.657169	-0.0771365	0.208	0.213	1
Snrk	0.167925	0.177512	0.216315	0.224408	0.324312	0.154282	0.127923	-0.0770524	0.074	0.1	1
Abcb7	0.274476	0.297236	0.281911	0.354361	0.417028	0.259301	0.323184	-0.0767995	0.117	0.137	1
Rubcn	0.206706	0.219351	0.179126	0.413351	0.26586	0.184699	0.139696	-0.0767917	0.088	0.114	1
Hspb1	0.750765	0.590166	0.538443	0.604417	0.752296	0.709643	0.671925	-0.0767395	0.23	0.207	1
Magt1	0.676706	0.823594	0.807635	0.763006	0.940377	0.826023	0.489684	-0.0766691	0.274	0.288	1
Cd82	0.410908	0.255008	0.422313	0.423501	0.403453	0.47452	0.62286	-0.0766576	0.149	0.157	1
Herpud1	1.48843	1.35977	1.36689	2.13553	1.35275	1.4506	0.911977	-0.0766541	0.426	0.419	1
Copb1	0.657553	0.772519	0.685808	0.655388	0.89984	0.739964	0.322879	-0.0766356	0.258	0.276	1
Dusp23	0.108554	0.278968	0.190916	0.236306	0.246904	0.310302	0.356551	-0.0766134	0.088	0.102	1
Cd53	2.45651	2.63436	2.65435	2.49599	2.83571	2.87088	0.457815	-0.0764841	0.655	0.659	1
Lcp2	1.03613	0.74571	0.650009	0.940832	0.856624	0.947748	0.138904	-0.0764435	0.278	0.315	1
Ndufa1	1.66163	1.47065	1.51983	1.02541	1.82865	1.84864	0.518935	-0.0763828	0.491	0.479	1
Mycbp2	1.15044	1.1911	1.23948	1.44685	1.1743	1.45354	0.451117	-0.0763404	0.402	0.423	1
Fam13b	0.506571	0.474421	0.459836	0.741857	0.59381	0.395591	0.330757	-0.0763032	0.175	0.2	1
Ints1	0.148438	0.153917	0.281342	0.248621	0.250527	0.274374	0.264896	-0.076226	0.084	0.102	1
Cdk13	0.605382	0.549687	0.692854	0.749267	0.725439	0.62833	0.422227	-0.0761232	0.23	0.247	1
Sf3b4	0.316526	0.331793	0.314465	0.478338	0.332332	0.438247	0.454114	-0.0760758	0.145	0.159	1
Ngly1	0.285186	0.317927	0.292815	0.355462	0.382124	0.360842	0.542418	-0.0760703	0.127	0.137	1
Arrb2	1.96623	2.40402	1.47439	1.9801	2.01053	2.42975	0.161653	-0.0760239	0.54	0.571	1
Rfx3	0.398369	0.458433	0.369934	1.05399	0.345657	0.372064	0.818784	-0.0759729	0.147	0.139	1
Xlr	0.883951	0.71478	0.83138	0.526122	0.843514	1.2173	0.653744	-0.0757122	0.279	0.28	1
Nf1	0.640358	0.511049	0.542263	0.610034	0.642943	0.666732	0.25083	-0.0756804	0.197	0.225	1
Fkbp3	1.05574	0.628414	0.703519	0.7876	0.94495	0.825073	0.813326	-0.0756513	0.291	0.292	1
Sec16a	0.269953	0.196939	0.168347	0.385838	0.286467	0.189668	0.437414	-0.0756296	0.089	0.104	1
Ndufb6	0.669514	0.570937	0.619737	0.391698	0.740419	0.832971	0.500692	-0.0755355	0.25	0.262	1
Nsf	0.389298	0.339562	0.41301	0.25999	0.575754	0.372182	0.792193	-0.0755007	0.16	0.162	1
Tnrc6a	0.684229	0.826416	0.824662	0.499402	0.947469	0.999007	0.0748411	-0.0754379	0.268	0.317	1
Eef1a1	24.856	24.2074	25.0727	25.7864	26.2681	25.888	0.0576764	-0.0754124	0.997	0.99	1
Isoc1	0.268976	0.304577	0.316518	0.324566	0.36977	0.388908	0.395781	-0.0753395	0.129	0.145	1
Ext2	0.359889	0.329333	0.301249	0.557592	0.384278	0.332009	0.334559	-0.0752517	0.144	0.16	1
Optn	0.551177	0.336742	0.211681	0.515959	0.432461	0.388653	0.403393	-0.0752241	0.131	0.147	1
Crim1	0.451262	0.579811	0.468229	0.683485	0.450077	0.74185	0.401944	-0.0750754	0.182	0.2	1
Acaa2	0.720049	0.463699	0.562029	0.688646	0.653406	0.642079	0.481442	-0.0750216	0.226	0.241	1
Ehd4	4.54687	4.76685	5.5443	5.8443	5.25443	4.93151	0.130364	-0.0748984	0.86	0.836	1
Pcmtd1	0.808962	1.21005	0.949609	1.22614	1.14889	0.985858	0.475402	-0.0748889	0.347	0.362	1
Ppp1ca	2.50928	2.298	2.57609	2.70818	2.63855	2.58249	0.26024	-0.074788	0.64	0.654	1
Herc2	0.654797	0.494041	0.44402	0.586637	0.682466	0.502388	0.606067	-0.074744	0.21	0.217	1
Fam91a1	0.47701	0.26495	0.34613	0.378671	0.419953	0.467585	0.693746	-0.0747332	0.159	0.162	1
Rnf185	0.317509	0.230198	0.203643	0.307053	0.371997	0.227186	0.140434	-0.0745484	0.102	0.131	1
Cd38	1.02507	0.985158	1.28513	0.821537	1.30037	1.28185	0.936522	-0.0743941	0.344	0.335	1
Cd164	1.14764	0.93097	0.93526	0.965817	1.01116	1.33358	0.917894	-0.0743272	0.357	0.344	1
Capza1	0.984949	1.01718	1.03442	0.930956	1.06418	1.32114	0.301956	-0.0743245	0.35	0.378	1
Rpl22	11.4393	10.1655	11.8807	10.2722	11.7845	12.5478	0.223882	-0.0741918	0.965	0.973	1
Psme2	1.07361	0.954992	0.955485	1.14792	1.01718	1.18944	0.477622	-0.0740826	0.354	0.362	1
Dyrk1a	0.632452	0.810355	0.699642	0.877122	0.82495	0.751568	0.16143	-0.0740492	0.231	0.268	1
Axl	0.884391	0.482253	0.620479	0.800541	0.640032	0.845003	0.133381	-0.0739641	0.2	0.241	1
Ehbp1l1	0.599301	0.569651	0.547052	0.897558	0.654869	0.505098	0.404077	-0.0739359	0.223	0.241	1
Smc1a	0.614015	0.780293	0.587894	0.780737	0.719908	0.799457	0.118342	-0.0739346	0.24	0.284	1
Ilrun	0.550587	0.557282	0.484157	0.56931	0.643577	0.589263	0.732536	-0.0739251	0.215	0.217	1
Retreg2	0.318953	0.436295	0.483863	0.501457	0.475193	0.507811	0.102959	-0.073895	0.159	0.198	1
Clns1a	0.325725	0.214306	0.227748	0.453622	0.274465	0.305226	0.438372	-0.0738898	0.109	0.123	1
Plk2	0.421517	0.311161	0.308427	0.510797	0.443219	0.30974	0.860661	-0.0738626	0.137	0.137	1
Jpx	0.245824	0.214994	0.260789	0.343052	0.318583	0.257163	0.159831	-0.0738469	0.099	0.125	1
Smad3	0.241646	0.185764	0.189236	0.46347	0.201061	0.252359	0.136815	-0.0737764	0.078	0.104	1
Mcm9	0.214695	0.338917	0.282712	0.167793	0.408869	0.369309	0.277893	-0.0737439	0.111	0.131	1
Zbtb8os	0.325378	0.283978	0.265712	0.393573	0.320132	0.397561	0.362899	-0.0736956	0.121	0.137	1
Xrn1	0.450189	0.381988	0.480884	0.341851	0.660177	0.371079	0.988529	-0.073602	0.172	0.168	1
Tmem109	0.735171	0.654939	0.762674	0.823408	0.683647	0.979943	0.440239	-0.0733498	0.263	0.278	1
Nemf	0.371236	0.232376	0.359083	0.461841	0.330975	0.41852	0.577825	-0.0731972	0.136	0.145	1
Rnf114	0.366139	0.342669	0.427127	0.416796	0.468473	0.435548	0.237545	-0.0731892	0.139	0.162	1
Brd4	1.2124	1.14678	1.22759	1.43454	1.27725	1.27413	0.674027	-0.0729577	0.39	0.386	1
Gm29340	0.232509	0.281274	0.149105	0.23006	0.322583	0.267533	0.244251	-0.0728609	0.091	0.112	1
Slc20a1	0.238425	0.249395	0.143459	0.487545	0.271913	0.151027	0.373246	-0.0727656	0.093	0.106	1
Slc39a10	0.810285	0.959524	0.910062	0.734725	1.00781	1.13753	0.0833372	-0.0725999	0.291	0.339	1
Prdx4	1.17256	0.854473	0.891009	1.05627	0.99154	1.18241	0.462216	-0.0725791	0.344	0.366	1
Fggy	0.222702	0.224612	0.273179	0.275461	0.356799	0.235654	0.124764	-0.0725201	0.094	0.123	1
Agpat1	0.221292	0.206357	0.249618	0.358314	0.234092	0.33018	0.267599	-0.072463	0.096	0.115	1
Ech1	1.03768	0.921737	0.89941	1.2032	0.932068	1.14444	0.394306	-0.0724044	0.354	0.366	1
Itch	0.831115	0.879286	0.861569	1.05729	0.98523	0.843288	0.956579	-0.0721976	0.306	0.299	1
BC049352	0.22732	0.330247	0.311932	0.379823	0.306382	0.431783	0.165624	-0.0721441	0.106	0.133	1
Arntl	0.355577	0.349506	0.170398	0.473589	0.343017	0.319822	0.0989641	-0.0721126	0.117	0.153	1
Cox16	1.3228	1.27637	1.4326	1.49669	1.43014	1.48576	0.29162	-0.0721011	0.425	0.46	1
Itga9	0.502489	0.802001	0.466169	0.809316	0.789553	0.448368	0.377948	-0.0720929	0.218	0.239	1
Wdr44	0.323299	0.350726	0.389069	0.609786	0.38442	0.373568	0.541441	-0.071816	0.147	0.157	1
Brwd1	0.257203	0.210754	0.225551	0.26238	0.329477	0.251137	0.383808	-0.0717415	0.089	0.104	1
Camkmt	0.310235	0.399502	0.435434	0.521106	0.447985	0.424371	0.247453	-0.0716892	0.132	0.157	1
Cir1	0.362512	0.840519	0.576103	0.596171	0.725429	0.702253	0.240144	-0.0716471	0.218	0.249	1
Farsb	0.163913	0.232822	0.224597	0.216862	0.310821	0.240303	0.218116	-0.0716194	0.091	0.114	1
Cpne2	0.331364	0.233262	0.260591	0.322677	0.341442	0.336112	0.593097	-0.0714419	0.117	0.125	1
Vac14	0.268432	0.196197	0.253164	0.311379	0.329875	0.242384	0.319636	-0.0714326	0.107	0.125	1
Rnasel	0.853902	0.827209	0.888175	0.987754	0.998741	0.845836	0.872356	-0.07136	0.299	0.29	1
Gm37494	0.321111	0.284481	0.317417	0.424292	0.267759	0.506654	0.697516	-0.0713384	0.121	0.125	1
Hexa	6.67076	7.12567	6.4409	8.94767	6.97093	6.38598	0.0828544	-0.0712569	0.926	0.914	1
Rbm33	0.301067	0.377115	0.23132	0.472906	0.420079	0.23989	0.278004	-0.0711303	0.131	0.153	1
Irf2	1.62714	2.16976	1.67601	1.85486	2.00295	2.05751	0.60022	-0.0710643	0.542	0.53	1
Vps4b	0.778824	0.826732	0.789919	1.02259	0.88318	0.824881	0.520795	-0.0710504	0.294	0.303	1
Ust	0.532619	0.550537	0.54635	0.610129	0.667627	0.55583	0.435287	-0.0710449	0.183	0.2	1
Plk3	0.556596	0.471392	0.497659	0.850376	0.463907	0.604998	0.190755	-0.0709587	0.17	0.202	1
Trappc9	0.431298	0.542599	0.39971	0.760259	0.435928	0.562475	0.333265	-0.0709525	0.165	0.188	1
Itgb1bp1	0.32589	0.288859	0.334442	0.297417	0.32519	0.519834	0.214138	-0.0709451	0.136	0.162	1
Cbfa2t2	0.186694	0.215052	0.315267	0.478219	0.275119	0.234136	0.157553	-0.0709146	0.094	0.119	1
Cbx4	0.446661	0.34204	0.43154	0.45845	0.45347	0.512422	0.415118	-0.0709041	0.157	0.172	1
Ccdc93	0.339243	0.237531	0.203521	0.404365	0.287098	0.323583	0.416614	-0.0708952	0.114	0.129	1
Ccnl2	0.515118	0.559252	0.54313	0.86829	0.54625	0.581242	0.742035	-0.070871	0.23	0.227	1
Zc3hav1	0.55017	0.365243	0.439928	0.512121	0.461657	0.609723	0.576269	-0.0707148	0.177	0.186	1
Arih2	0.345428	0.508148	0.489977	0.682893	0.519449	0.441683	0.269252	-0.0707077	0.165	0.186	1
Anp32a	1.57149	1.25696	1.40577	1.47737	1.61601	1.39216	0.420527	-0.0704195	0.464	0.472	1
Ik	1.01025	1.36365	1.08179	1.38291	1.29793	1.17383	0.379919	-0.0704028	0.387	0.397	1
Arhgef3	2.07362	1.6159	2.59796	3.15825	1.95514	2.07492	0.885021	-0.0703917	0.499	0.479	1
Uqcr11	4.62306	4.07196	4.08838	4.03839	4.94168	4.09796	0.266766	-0.070376	0.83	0.808	1
Tsc22d1	0.667358	0.697426	1.36673	1.36182	0.888173	0.947791	0.0134223	-0.0702545	0.25	0.309	1
Sestd1	0.299228	0.290942	0.194226	0.4	0.301267	0.318853	0.321927	-0.070161	0.107	0.125	1
Fbxo6	0.285772	0.230193	0.209245	0.265073	0.327661	0.28405	0.130514	-0.0701539	0.101	0.129	1
Aars	0.365483	0.337743	0.270122	0.662139	0.340857	0.30482	0.832386	-0.0701511	0.139	0.131	1
Mapre2	1.05589	1.25481	1.09239	1.61844	1.21673	1.07808	0.575094	-0.0701335	0.379	0.38	1
Vamp4	0.629647	0.812539	0.768064	0.977619	0.805443	0.778655	0.26986	-0.0700402	0.256	0.282	1
Srek1	0.736986	0.651607	0.499721	0.962052	0.633104	0.679234	0.254637	-0.0700192	0.225	0.254	1
Hnrnph3	0.609613	0.731833	0.48925	0.943328	0.790045	0.402862	0.627331	-0.0700146	0.233	0.243	1
C1qa	77.8674	74.6433	75.4711	84.8363	81.2064	74.1752	0.0018945	-0.0698027	0.997	0.994	1
Ralgps2	0.329124	0.360033	0.425586	0.66121	0.396089	0.374283	0.211521	-0.0698008	0.144	0.17	1
Rab5b	0.424253	0.60007	0.59519	0.703073	0.619652	0.575863	0.365762	-0.0696578	0.217	0.237	1
Nufip2	1.29037	1.08508	1.26572	1.4046	1.3799	1.1539	0.848654	-0.0696318	0.423	0.382	1
Rap1b	5.34124	5.63283	5.2144	5.82335	5.80778	5.54351	0.162976	-0.0695928	0.864	0.867	1
Dmac1	0.670696	0.622392	0.984802	0.684743	0.865076	0.891828	0.45546	-0.0695857	0.286	0.301	1
Psmg4	0.655772	0.737888	0.643213	0.751059	0.735665	0.822995	0.302429	-0.0695246	0.26	0.282	1
Ythdc1	1.39519	1.26681	1.08327	1.54712	1.35627	1.24601	0.603758	-0.0694898	0.388	0.391	1
Fam126a	0.382319	0.581301	0.564021	0.848553	0.554046	0.491102	0.532544	-0.0693568	0.203	0.215	1
Mtus1	0.450919	0.525864	0.585399	0.632825	0.629212	0.524632	0.58453	-0.0693566	0.197	0.207	1
Akap8l	0.356802	0.480504	0.545792	0.758753	0.569291	0.348086	0.559617	-0.0693416	0.179	0.19	1
Gpr107	0.331709	0.434932	0.258555	0.386231	0.482948	0.320538	0.528127	-0.0692884	0.155	0.164	1
Cmah	0.890873	0.95024	0.876615	1.2841	0.986716	0.855932	0.364696	-0.0689354	0.294	0.321	1
Dhps	0.367077	0.256758	0.281005	0.606398	0.323927	0.272194	0.901198	-0.0688992	0.117	0.119	1
Apopt1	0.232962	0.407969	0.389972	0.535349	0.371425	0.411685	0.196739	-0.0687499	0.147	0.176	1
Rbmxl1	0.340729	0.296629	0.305273	0.461154	0.343979	0.37755	0.689903	-0.068683	0.134	0.137	1
Eri3	0.320442	0.511691	0.384001	0.407743	0.483663	0.523975	0.189451	-0.0685506	0.169	0.196	1
Prkag2	0.633524	0.591352	0.506766	0.8352	0.63418	0.574677	0.528016	-0.0684071	0.226	0.239	1
Edil3	0.600611	0.376631	0.46085	0.618242	0.411996	0.704271	0.424421	-0.0683815	0.139	0.155	1
Mxra7	0.293632	0.344569	0.335711	0.464704	0.388188	0.349864	0.206833	-0.0683785	0.129	0.153	1
Akna	0.182986	0.281602	0.331017	0.371112	0.319173	0.319196	0.271528	-0.0683564	0.109	0.129	1
Dync1li1	0.351219	0.380531	0.320954	0.360417	0.514752	0.300226	0.477278	-0.068349	0.152	0.164	1
Vps45	0.145236	0.234406	0.248586	0.197451	0.295592	0.275473	0.253382	-0.0682424	0.088	0.108	1
Aup1	0.689222	0.960424	0.959588	0.742981	1.19451	0.748101	0.530895	-0.068189	0.327	0.325	1
Ifngr1	1.93375	2.57454	2.48698	2.0525	2.49716	2.82374	0.426044	-0.0681714	0.635	0.658	1
Myh9	1.7883	1.85365	1.66125	1.2858	2.03616	2.07638	0.839977	-0.0679993	0.522	0.509	1
Mfap3	0.445595	0.262574	0.350483	0.319517	0.450702	0.402935	0.142672	-0.0679032	0.137	0.168	1
Bbs9	0.192634	0.279775	0.289125	0.378477	0.278689	0.340325	0.389757	-0.0678835	0.093	0.108	1
Swt1	0.299913	0.243524	0.238264	0.14963	0.393234	0.305451	0.586263	-0.0678314	0.106	0.114	1
Ano10	0.0902083	0.258922	0.240847	0.476122	0.197884	0.227398	0.281089	-0.0677718	0.083	0.102	1
Spata6	0.412195	0.180624	0.278813	0.285444	0.348898	0.370573	0.636781	-0.0677584	0.121	0.127	1
Pafah1b3	0.23103	0.306041	0.320959	0.604583	0.287633	0.294778	0.305855	-0.0677402	0.107	0.127	1
Topors	0.282439	0.341499	0.243627	0.333022	0.38225	0.323551	0.217699	-0.0677215	0.109	0.133	1
Nuak2	0.177233	0.239524	0.258359	0.283081	0.284933	0.287908	0.290922	-0.0675729	0.094	0.112	1
Slc12a7	0.338631	0.189163	0.294194	0.225113	0.321585	0.402345	0.395445	-0.0674443	0.109	0.125	1
Slc16a6	0.434672	0.380471	0.511038	0.321188	0.601922	0.470074	0.176707	-0.067431	0.155	0.186	1
Fbxw4	0.74631	0.664904	0.69217	0.807189	0.738178	0.827833	0.164223	-0.0673219	0.251	0.292	1
Rsf1	0.4904	0.518723	0.489373	0.71296	0.482988	0.628897	0.313399	-0.067177	0.205	0.231	1
Fam111a	0.868376	1.61552	1.06948	1.15727	1.39298	1.30554	0.292927	-0.067135	0.382	0.415	1
Grk5	0.33773	0.314133	0.613358	0.464105	0.531884	0.420712	0.411377	-0.0671329	0.147	0.164	1
Cyb5r4	0.376414	0.255298	0.349751	0.480242	0.353285	0.377208	0.752075	-0.0669632	0.14	0.145	1
Tigd2	0.288782	0.400497	0.542705	0.595773	0.460043	0.43871	0.610825	-0.0669342	0.17	0.176	1
Fip1l1	0.457208	0.332489	0.367985	0.459343	0.477013	0.392174	0.46175	-0.0668844	0.162	0.178	1
Susd1	0.363318	0.402142	0.382935	0.453704	0.440751	0.462172	0.648672	-0.0668436	0.147	0.137	1
E2f5	0.236427	0.149707	0.265037	0.311936	0.243699	0.287091	0.559604	-0.0668419	0.091	0.1	1
Abcb1b	0.691287	1.383	0.804548	1.14981	0.976328	1.21365	0.541141	-0.0668371	0.304	0.323	1
March7	0.735069	0.59266	0.607973	0.741696	0.778552	0.608824	0.579784	-0.0668343	0.238	0.25	1
G3bp1	0.693261	0.80608	0.892473	0.632645	1.0574	0.763611	0.407021	-0.0667894	0.291	0.311	1
Vps13b	0.993787	0.973856	1.20094	1.05045	1.21986	1.09762	0.458425	-0.0666901	0.319	0.344	1
3830406C13Rik	0.26049	0.346894	0.443067	0.424258	0.427638	0.390318	0.57532	-0.0666229	0.145	0.155	1
Rlim	0.845304	0.909556	0.815848	1.26653	0.895554	0.838138	0.656669	-0.0665112	0.302	0.303	1
Ywhag	1.01451	1.06141	0.94959	1.3459	1.07263	1.01481	0.840898	-0.0664701	0.364	0.354	1
Glo1	0.556851	0.592003	0.366513	0.524769	0.582472	0.611216	0.332804	-0.0663877	0.195	0.217	1
Por	0.638568	0.609623	0.643752	0.783053	0.71389	0.646283	0.450643	-0.0662691	0.23	0.243	1
Hhex	0.387431	0.305862	0.302971	0.574303	0.295318	0.435111	0.745449	-0.0662016	0.129	0.133	1
Cd81	10.5395	11.1162	10.693	12.5147	11.4414	10.5323	0.164694	-0.0661236	0.97	0.961	1
Atp9b	0.471053	0.48629	0.553158	0.53471	0.543461	0.64458	0.66714	-0.0660851	0.205	0.209	1
Eapp	0.603442	0.687133	0.612803	0.406701	0.750606	0.844327	0.597724	-0.0659014	0.251	0.26	1
Nrf1	0.330134	0.289649	0.339087	0.63571	0.320546	0.316915	0.650132	-0.0658835	0.129	0.135	1
Arhgef11	0.27174	0.321284	0.393689	0.421796	0.365708	0.413736	0.836114	-0.0657597	0.126	0.129	1
Lman1	0.528021	0.523587	0.656187	0.722513	0.62862	0.608843	0.474454	-0.0657008	0.22	0.233	1
Avl9	0.287321	0.221163	0.271636	0.711729	0.192012	0.272225	0.633259	-0.0656198	0.107	0.115	1
Zswim4	0.174395	0.260483	0.317258	0.328685	0.406961	0.146085	0.205693	-0.0651546	0.104	0.129	1
Cyp4f13	0.298054	0.352491	0.344312	0.394414	0.351677	0.464004	0.654341	-0.0650972	0.137	0.145	1
Stx8	0.798406	0.971822	0.879702	1.12672	0.950882	0.928334	0.292247	-0.0650877	0.311	0.327	1
Nelfe	0.222718	0.306199	0.146277	0.3671	0.259411	0.281097	0.273698	-0.0650343	0.096	0.115	1
Eed	0.42375	0.593005	0.351662	0.645901	0.515777	0.489229	0.386746	-0.0648503	0.183	0.2	1
Apaf1	0.253608	0.25964	0.287253	0.251038	0.260331	0.471897	0.105155	-0.0647979	0.109	0.141	1
Itgb2	0.995521	1.16989	1.03748	0.989143	1.35333	0.98921	0.455912	-0.0647744	0.37	0.391	1
Ano6	0.754215	0.579195	0.590041	0.860466	0.783001	0.504917	0.283449	-0.0647163	0.245	0.27	1
Specc1	0.864272	0.628028	0.63861	1.27204	0.78279	0.480426	0.778091	-0.0647155	0.238	0.241	1
Atp2c1	0.732203	0.712802	0.848918	0.917031	0.847022	0.791394	0.778269	-0.0646831	0.271	0.272	1
Ccdc82	0.226018	0.340497	0.219798	0.281408	0.31707	0.365349	0.680219	-0.0646138	0.116	0.121	1
Nsmce2	1.42792	1.32219	1.08455	1.55617	1.34396	1.33874	0.708615	-0.0645462	0.413	0.405	1
Sdc4	1.72973	1.60083	1.32245	1.21568	1.83954	1.66875	0.435511	-0.0644947	0.43	0.384	1
Hadhb	0.381825	0.327424	0.402622	0.433736	0.33865	0.574046	0.320666	-0.0644946	0.159	0.178	1
Pan3	0.935168	0.969773	0.979966	1.16296	1.08667	0.930463	0.770548	-0.0644653	0.342	0.344	1
Irf5	1.17547	1.09802	1.17746	1.54477	1.07567	1.33153	0.930335	-0.0644229	0.402	0.374	1
Rab8a	0.465937	0.573393	0.489597	0.744081	0.55432	0.531622	0.51583	-0.0643589	0.2	0.215	1
Pign	0.171505	0.181554	0.259682	0.369882	0.191197	0.297202	0.368944	-0.0643226	0.089	0.104	1
Nfyc	0.169967	0.232547	0.323011	0.373184	0.22945	0.364636	0.381593	-0.0642526	0.106	0.121	1
Nasp	0.857037	1.13512	0.77358	1.25253	1.08143	0.793369	0.208943	-0.0641729	0.298	0.329	1
Srp19	0.809658	0.7062	0.681209	0.791161	0.812086	0.812287	0.765848	-0.064163	0.281	0.28	1
Zfp740	0.16775	0.198456	0.219978	0.156633	0.264725	0.28421	0.382058	-0.0640247	0.088	0.102	1
2410006H16Rik	2.38361	2.32174	2.43047	2.2503	2.49782	2.745	0.785125	-0.0639972	0.6	0.585	1
Cks2	0.224265	0.229805	0.268997	0.183234	0.269545	0.408935	0.546349	-0.0638873	0.099	0.11	1
Slc38a9	0.401008	0.422924	0.314163	0.615775	0.448803	0.332721	0.856308	-0.0638831	0.162	0.16	1
Macf1	2.00041	2.01508	1.8388	2.20187	2.16088	1.90362	0.424685	-0.0638544	0.531	0.534	1
Map3k8	0.540634	0.874971	0.505794	0.658729	0.610991	0.965357	0.855279	-0.0638493	0.246	0.233	1
Arhgef1	0.563464	0.581632	0.546518	0.421241	0.671214	0.709387	0.526803	-0.0638192	0.217	0.229	1
Wdr70	0.547689	0.451606	0.485784	0.611919	0.5196	0.589541	0.109413	-0.0638091	0.183	0.223	1
Tor1aip1	0.980388	1.09793	0.976655	1.29595	1.14298	0.961197	0.843536	-0.0637396	0.365	0.37	1
Uhrf2	0.359066	0.418004	0.591239	0.580789	0.489672	0.534336	0.580906	-0.0635205	0.179	0.188	1
Slc40a1	0.831601	0.83526	0.546706	0.7615	0.839124	0.826506	0.579447	-0.0634566	0.205	0.215	1
2310010J17Rik	0.187368	0.313625	0.355314	0.329479	0.291265	0.445072	0.576915	-0.0634502	0.106	0.115	1
Rpl28	17.8806	15.7964	16.9571	18.0509	18.1811	16.3915	0.147184	-0.0633534	0.98	0.988	1
Gm31718	0.28709	0.285432	0.39332	0.286902	0.311522	0.543627	0.926753	-0.0632487	0.124	0.123	1
Anapc15	0.483444	0.497105	0.491283	0.760946	0.612552	0.347239	0.40756	-0.0629776	0.19	0.166	1
Copb2	0.463436	0.539516	0.502702	0.470439	0.638271	0.527746	0.681148	-0.0628905	0.215	0.221	1
Mdm4	0.636607	0.410585	0.496499	0.499028	0.625349	0.536097	0.454127	-0.0628422	0.198	0.213	1
P2rx4	1.36772	1.17152	1.27065	1.59779	1.30932	1.30653	0.307585	-0.0628352	0.402	0.431	1
Itga5	0.266412	0.168719	0.295942	0.39855	0.239044	0.317654	0.153267	-0.0627595	0.091	0.117	1
Cdkn1a	1.62592	1.97965	1.5696	1.91457	1.74676	2.01864	0.892428	-0.0627554	0.337	0.323	1
Zfp326	0.28192	0.344809	0.309561	0.321701	0.383967	0.386396	0.564945	-0.062675	0.131	0.141	1
Casp1	0.861878	0.829488	0.787729	1.11848	0.789201	0.965702	0.704994	-0.0626241	0.306	0.309	1
Top1	2.1562	2.34899	2.30628	2.65781	2.28931	2.49023	0.838328	-0.0625135	0.598	0.575	1
Igbp1	0.448819	0.335953	0.467695	0.738632	0.447031	0.358241	0.70205	-0.0624449	0.169	0.176	1
Chka	0.808184	1.00191	0.800274	1.44423	0.8339	0.8727	0.404166	-0.0622982	0.304	0.266	1
Tomm34	0.460553	0.379313	0.261869	0.723792	0.380514	0.319789	0.748503	-0.0622424	0.149	0.153	1
Dlgap4	1.03312	1.0478	1.14548	1.2784	1.19841	1.04594	0.135653	-0.0621587	0.342	0.38	1
Coq10b	0.583778	0.777867	0.694629	1.16907	0.738079	0.568996	0.550464	-0.0620152	0.246	0.256	1
Cdk6	1.27189	1.62387	0.912096	1.12836	1.40035	1.53517	0.775704	-0.0620107	0.4	0.372	1
Med13l	0.700976	0.708775	0.841003	1.02024	0.780428	0.77862	0.219412	-0.0620014	0.26	0.294	1
Arhgap18	1.81677	1.72573	1.50521	2.16215	1.75593	1.65265	0.553958	-0.0619851	0.483	0.489	1
Mrps21	2.17234	1.77505	2.28859	2.49967	2.05254	2.23047	0.413379	-0.0618888	0.608	0.595	1
Svil	0.792772	0.616898	0.640421	0.862568	0.679068	0.797959	0.311463	-0.0618848	0.236	0.264	1
Mtln	0.875513	0.396535	0.619705	0.545178	0.724261	0.701862	0.340912	-0.061856	0.233	0.256	1
Zfp384	0.323393	0.176932	0.261017	0.277212	0.245967	0.408147	0.100798	-0.0617968	0.094	0.125	1
Tal1	0.287874	0.248364	0.337235	0.400412	0.386657	0.245437	0.161371	-0.0617827	0.107	0.137	1
Setx	0.505437	0.29555	0.500569	0.624849	0.437614	0.480975	0.958538	-0.0617515	0.157	0.157	1
Rps6kc1	0.213847	0.181516	0.168726	0.32402	0.218307	0.220643	0.17478	-0.0617176	0.079	0.102	1
Mydgf	0.798903	0.876186	0.66815	1.02543	0.858045	0.777209	0.42068	-0.061703	0.294	0.313	1
4933434E20Rik	0.73264	0.595183	0.500411	0.872513	0.69447	0.529411	0.652085	-0.0615796	0.24	0.245	1
Kat6b	0.389699	0.425708	0.245592	0.41957	0.421143	0.407311	0.708304	-0.0615435	0.137	0.143	1
Glt8d1	0.245846	0.209252	0.224638	0.347759	0.251128	0.280194	0.9005	-0.0614816	0.102	0.102	1
AU040320	0.186188	0.277023	0.333938	0.383827	0.369968	0.21116	0.31043	-0.0614588	0.116	0.137	1
Mitd1	0.343445	0.346626	0.204235	0.211123	0.498648	0.219892	0.771115	-0.0614168	0.124	0.127	1
Plbd2	0.777369	0.794231	0.47052	1.08305	0.718978	0.626611	0.940759	-0.0614039	0.271	0.268	1
Dnmt1	0.263062	0.247851	0.251572	0.136752	0.356568	0.334997	0.939345	-0.0613368	0.114	0.11	1
Mrpl42	0.712548	0.78596	0.777954	0.692758	0.876028	0.864453	0.236001	-0.0612754	0.279	0.313	1
Csnk1d	0.563547	0.367545	0.400547	0.507938	0.585362	0.358654	0.693564	-0.0612336	0.174	0.182	1
Gpr183	1.33083	1.45568	0.684286	1.04246	1.27514	1.38692	0.921241	-0.0612159	0.35	0.335	1
Smox	0.242414	0.211051	0.213011	0.265169	0.330378	0.189802	0.496979	-0.0610914	0.096	0.108	1
Gpbp1	0.694832	0.579663	0.623965	0.939337	0.586406	0.732088	0.75195	-0.0610382	0.23	0.237	1
Tma7	2.07509	1.73856	1.90486	1.49301	2.11009	2.19118	0.393256	-0.060988	0.567	0.581	1
Atp2b1	4.9362	5.06032	4.92585	6.12996	5.07433	4.95473	0.230661	-0.060797	0.846	0.838	1
Pdgfc	1.16225	0.854888	0.898975	1.03479	1.0602	1.03106	0.294086	-0.0607153	0.301	0.252	1
Plaat3	0.430374	0.472261	0.478453	0.674598	0.473167	0.514235	0.475404	-0.0605958	0.188	0.202	1
Snx20	0.560405	0.339409	0.37486	0.614335	0.485863	0.383901	0.341547	-0.0605484	0.165	0.188	1
Babam2	1.09329	0.952797	0.954012	0.992439	1.01687	1.23704	0.436643	-0.0605114	0.319	0.341	1
Dpp9	0.271046	0.256943	0.210888	0.251357	0.317348	0.301087	0.899812	-0.0603095	0.111	0.106	1
Fam3c	0.703772	0.529265	0.614312	0.614851	0.693341	0.69148	0.741051	-0.0602952	0.245	0.247	1
Araf	0.352758	0.34971	0.38478	0.479388	0.394791	0.423716	0.709892	-0.06026	0.147	0.155	1
Ipmk	0.286779	0.266815	0.306277	0.326073	0.354648	0.325988	0.798518	-0.0602377	0.129	0.119	1
Taf12	0.279525	0.27448	0.485742	0.425403	0.397701	0.390363	0.471974	-0.0602192	0.152	0.166	1
Qdpr	0.623376	0.381829	0.456878	0.487302	0.618467	0.451953	0.899452	-0.0598111	0.203	0.2	1
Luzp1	0.46175	0.536879	0.828382	0.668317	0.683628	0.665569	0.283854	-0.0597179	0.217	0.245	1
Emd	0.467184	0.524138	0.468531	0.476531	0.551036	0.599274	0.871368	-0.0596162	0.2	0.198	1
Ncoa2	0.579983	0.827834	0.781565	0.707468	0.761609	0.95345	0.361155	-0.0595899	0.26	0.288	1
Leprotl1	0.641533	0.534634	0.457217	0.610044	0.599521	0.617645	0.558549	-0.0594862	0.217	0.225	1
Stk24	0.377924	0.572373	0.407953	0.560733	0.572555	0.420123	0.779835	-0.0594606	0.187	0.19	1
Dpf2	0.209935	0.227744	0.246206	0.422204	0.272993	0.20449	0.137892	-0.0593946	0.088	0.115	1
1810030O07Rik	0.192117	0.259326	0.1783	0.244036	0.289051	0.236585	0.457132	-0.0593295	0.094	0.106	1
Hcfc1r1	1.40079	1.14659	1.40212	1.33894	1.39818	1.44533	0.883695	-0.0592886	0.446	0.432	1
Thrb	0.464983	0.387778	0.409004	0.734596	0.502289	0.281502	0.7345	-0.0591618	0.144	0.149	1
Gm29282	0.397012	0.40665	0.599104	0.511391	0.472042	0.621717	0.805892	-0.059083	0.172	0.162	1
Arhgap6	0.571605	0.572397	0.504327	0.668098	0.627323	0.564014	0.448301	-0.0590686	0.157	0.172	1
Cnot7	0.170251	0.347655	0.267531	0.460218	0.255617	0.341695	0.898626	-0.0590267	0.117	0.117	1
Litaf	2.9755	2.52445	2.38056	3.52413	2.51588	2.70274	0.256607	-0.0589603	0.631	0.636	1
Pnisr	1.08317	1.3772	1.04746	1.35982	1.31388	1.15908	0.635788	-0.0589539	0.385	0.389	1
Wdr37	0.267288	0.236505	0.244913	0.180189	0.314149	0.351715	0.42582	-0.0588532	0.096	0.112	1
Tcf20	0.624282	0.659332	0.714197	0.787956	0.80292	0.597001	0.0820256	-0.0588481	0.215	0.258	1
Setd7	0.378616	0.161821	0.390299	0.246282	0.382917	0.374597	0.187178	-0.0588014	0.121	0.147	1
C5ar2	0.163298	0.333833	0.187984	0.136273	0.29039	0.37338	0.107925	-0.058792	0.088	0.117	1
Lima1	0.675419	0.494009	0.571101	0.505467	0.730717	0.574053	0.821478	-0.058779	0.231	0.221	1
Dnm1l	0.100082	0.273039	0.182537	0.300774	0.256113	0.182084	0.305975	-0.0587759	0.083	0.1	1
Ptpn12	1.17651	1.27728	0.968807	1.4295	1.0719	1.3847	0.862479	-0.0587697	0.398	0.391	1
Clasp2	0.676068	0.668609	0.365092	0.731631	0.57358	0.688118	0.714468	-0.0587346	0.212	0.213	1
D830036C21Rik	0.272715	0.335783	0.429573	0.218474	0.417936	0.489523	0.355639	-0.0586388	0.134	0.112	1
Phf2	0.198413	0.259615	0.245709	0.165819	0.337992	0.282566	0.400398	-0.0586257	0.102	0.117	1
Ehmt1	0.291065	0.472084	0.466377	0.179447	0.590252	0.468438	0.445896	-0.0585434	0.165	0.18	1
Pde8a	0.238733	0.223908	0.242825	0.482344	0.250967	0.22113	0.275624	-0.0585392	0.096	0.115	1
Ssbp3	0.335523	0.327221	0.345538	0.431644	0.330302	0.462275	0.393594	-0.0585171	0.142	0.159	1
Fbl	0.502949	0.367765	0.571613	0.554908	0.593603	0.428396	0.359794	-0.0583685	0.195	0.215	1
Rap2a	0.169141	0.241403	0.169136	0.24329	0.256614	0.230288	0.194394	-0.0583107	0.084	0.108	1
Selenon	0.243053	0.295055	0.176318	0.407085	0.296112	0.217743	0.554911	-0.0582966	0.101	0.11	1
Cul3	0.767708	0.582302	0.736732	0.774142	0.752477	0.754412	0.784261	-0.0582607	0.268	0.249	1
Cops3	0.287985	0.186652	0.202646	0.246634	0.271519	0.290634	0.515127	-0.0582604	0.093	0.104	1
Cetn2	0.316741	0.367043	0.342293	0.388084	0.494342	0.255067	0.5677	-0.0581954	0.144	0.155	1
Gm6377	0.169035	0.214933	0.367883	0.264339	0.32758	0.28189	0.458936	-0.058174	0.096	0.11	1
Ccdc9	0.276691	0.322645	0.340499	0.582301	0.379517	0.221311	0.717483	-0.0581192	0.136	0.123	1
Rara	0.291077	0.346041	0.373191	0.368383	0.373652	0.438487	0.450647	-0.0579857	0.136	0.151	1
Ppp1r7	0.198676	0.266704	0.322877	0.364209	0.29791	0.315005	0.373146	-0.0579426	0.121	0.137	1
Atrx	1.72431	2.40472	1.98932	2.28492	2.06899	2.33104	0.214207	-0.0579309	0.516	0.554	1
Ifih1	0.13083	0.265143	0.22119	0.248253	0.27533	0.242851	0.346648	-0.0578505	0.088	0.104	1
Hivep1	0.354574	0.204197	0.319545	0.302573	0.356947	0.332667	0.924249	-0.0577519	0.126	0.125	1
Pak1ip1	0.334872	0.316595	0.178107	0.352951	0.403935	0.198789	0.247861	-0.0576263	0.112	0.135	1
Zbtb11	0.374918	0.250205	0.236806	0.320497	0.347461	0.327029	0.648059	-0.057605	0.122	0.129	1
Actb	48.4045	47.2736	47.1268	56.9096	53.2001	39.2827	0.273971	-0.057582	0.998	0.998	1
Rpp21	0.665912	0.727463	0.728083	0.633337	0.860739	0.73621	0.745201	-0.057538	0.269	0.278	1
Nars	1.16118	1.66022	1.21911	1.57846	1.37502	1.53847	0.805041	-0.0574739	0.453	0.45	1
Anxa2	0.808022	1.22024	0.794472	0.985744	1.20113	0.814925	0.571135	-0.0574335	0.289	0.262	1
Arid1a	0.927989	0.814229	0.871897	0.859854	0.955705	0.972755	0.597875	-0.0574239	0.317	0.331	1
Alox5ap	6.08738	5.4752	5.55249	6.13053	5.4363	6.67665	0.449242	-0.0574172	0.851	0.869	1
Aldh7a1	0.466709	0.464564	0.415911	0.451288	0.500735	0.555268	0.559617	-0.0572953	0.179	0.19	1
Afg3l1	0.185521	0.257371	0.216249	0.257942	0.26	0.299658	0.37679	-0.0572713	0.094	0.11	1
Appbp2	0.263182	0.408974	0.295674	0.492731	0.35456	0.360134	0.583427	-0.0572646	0.122	0.131	1
Idua	0.133597	0.362772	0.204744	0.44388	0.311814	0.17254	0.573372	-0.0571572	0.093	0.102	1
Pex6	0.244016	0.310183	0.159408	0.285917	0.283333	0.310294	0.205733	-0.0571556	0.093	0.115	1
Nedd4l	0.209958	0.334525	0.550772	0.247674	0.435297	0.502801	0.670274	-0.0569431	0.137	0.143	1
Gm44710	0.859589	0.799704	0.95572	1.01047	0.882081	0.997842	0.569383	-0.0568852	0.278	0.294	1
Rab3gap2	0.545431	0.47461	0.394934	0.650688	0.559855	0.408493	0.897114	-0.0568335	0.175	0.176	1
Ubxn4	1.12269	1.23161	0.96485	1.15072	1.17824	1.25934	0.42022	-0.0567818	0.385	0.399	1
Exoc6	0.337823	0.208599	0.269564	0.357832	0.32332	0.285334	0.426075	-0.0567558	0.104	0.119	1
Cd40	0.27556	0.347799	0.420854	0.47732	0.441484	0.298096	0.407557	-0.0567543	0.132	0.149	1
Ppil4	0.304871	0.330048	0.367492	0.328292	0.415897	0.37936	0.490149	-0.0566616	0.145	0.16	1
Slu7	0.332198	0.395968	0.335727	0.46307	0.399284	0.400526	0.447357	-0.0566051	0.147	0.162	1
Fbxl17	1.78576	1.86953	1.66421	2.32862	1.91245	1.58767	0.966764	-0.056541	0.494	0.47	1
Lgals8	0.567665	0.658968	0.315314	0.486528	0.58745	0.632925	0.156599	-0.0565291	0.195	0.229	1
Stk10	0.207927	0.259034	0.290544	0.391462	0.272345	0.300066	0.120098	-0.0564329	0.096	0.127	1
Rps26	12.942	12.4494	14.1601	12.6042	13.6556	14.4613	0.306986	-0.0564275	0.965	0.963	1
Dcn	0.189512	0.253817	0.316399	0.342025	0.340865	0.223374	0.346257	-0.056356	0.093	0.11	1
Ppp2r5a	0.617098	0.643867	0.845096	0.731697	0.806424	0.727943	0.40516	-0.0563418	0.271	0.286	1
Ctla2b	3.2095	2.84591	3.01	3.41584	2.71979	3.72855	0.549267	-0.0563094	0.621	0.63	1
Cdkn1b	0.267387	0.307711	0.356236	0.449297	0.275985	0.449324	0.440976	-0.0562926	0.129	0.145	1
Pdcd11	0.155549	0.302854	0.297239	0.37032	0.262767	0.336814	0.505788	-0.0561436	0.109	0.121	1
Cped1	0.221534	0.451647	0.343396	0.459338	0.418455	0.337778	0.582534	-0.0561148	0.127	0.137	1
Gpsm3	1.01272	0.735947	0.965308	1.02127	0.959531	0.948813	0.439208	-0.0561058	0.319	0.337	1
Msn	2.63681	3.32101	2.76321	3.1549	3.1715	2.92741	0.994861	-0.0560061	0.691	0.675	1
Arl13b	0.383002	0.387782	0.408733	0.380384	0.424776	0.526317	0.506743	-0.0559883	0.154	0.166	1
Mrpl36	0.547762	0.470798	0.567338	0.430503	0.666138	0.550408	0.240007	-0.0559486	0.21	0.243	1
Reps1	0.177995	0.244408	0.210185	0.11216	0.298366	0.293134	0.418259	-0.0559468	0.093	0.108	1
Med7	0.291744	0.345215	0.272699	0.418197	0.314148	0.389624	0.33627	-0.0559321	0.126	0.145	1
Lpxn	0.792611	1.05592	0.631285	1.24094	0.879537	0.769027	0.567106	-0.0558992	0.291	0.303	1
Fbxo11	1.27619	1.31224	1.34675	1.60935	1.36477	1.34008	0.886191	-0.055761	0.405	0.397	1
Uba1	0.657967	0.690189	0.567376	0.655179	0.778299	0.621661	0.364231	-0.0557111	0.238	0.262	1
Zfp800	0.370525	0.334861	0.469533	0.521981	0.446973	0.389078	0.874682	-0.0555131	0.159	0.162	1
Fosl2	0.557958	0.766878	0.843264	0.943658	0.692924	0.868921	0.373245	-0.0553408	0.246	0.26	1
Cd44	0.795427	0.931772	0.515047	0.86674	0.896166	0.690609	0.745817	-0.0552594	0.241	0.225	1
Sfpq	1.61984	1.61703	1.41648	1.7866	1.65216	1.57513	0.925279	-0.0552268	0.471	0.458	1
Phf12	0.249468	0.156038	0.178952	0.182049	0.236727	0.273795	0.491282	-0.0550478	0.088	0.1	1
Stim2	0.462736	0.329072	0.445572	0.537834	0.462179	0.413557	0.375982	-0.0549872	0.155	0.174	1
Cdc5l	0.577193	0.510976	0.376666	0.733419	0.50673	0.494476	0.394998	-0.05494	0.187	0.205	1
Rbm6	0.635425	0.620589	0.652094	0.762282	0.663721	0.715185	0.668257	-0.0548963	0.235	0.243	1
Socs4	0.29762	0.231268	0.331969	0.260521	0.395311	0.278645	0.555594	-0.0548466	0.119	0.129	1
Wdr61	0.263881	0.450846	0.479367	0.270924	0.47547	0.542933	0.455662	-0.054841	0.162	0.176	1
Arfgef2	0.337379	0.407545	0.534636	0.884207	0.439928	0.30486	0.960091	-0.0546694	0.172	0.164	1
Casp3	0.240139	0.29794	0.239799	0.32577	0.271108	0.364146	0.327666	-0.0546363	0.104	0.121	1
Ube2h	0.652608	0.660091	0.699491	0.753148	0.66226	0.838914	0.551619	-0.0546	0.248	0.262	1
Plcl1	0.404243	0.411044	0.436899	0.505202	0.453876	0.480185	0.581478	-0.0545584	0.129	0.139	1
Chsy1	0.434627	0.339221	0.309059	0.497082	0.446038	0.302578	0.382413	-0.054553	0.136	0.153	1
Scimp	0.165166	0.41956	0.225894	0.29529	0.427212	0.197235	0.188918	-0.0545228	0.091	0.115	1
Nans	0.251578	0.457549	0.380258	0.411728	0.436188	0.409892	0.787542	-0.0544534	0.167	0.159	1
Clcn4	0.551686	0.68214	0.543138	0.770382	0.657679	0.596066	0.791312	-0.0544208	0.233	0.233	1
Dnmbp	0.19737	0.241803	0.351746	0.328663	0.299303	0.322028	0.468321	-0.0544064	0.109	0.121	1
Ap2a1	0.284983	0.380152	0.233292	0.463013	0.381237	0.246505	0.628815	-0.0543249	0.127	0.137	1
Aff4	1.10713	1.05428	1.13278	1.47855	1.15706	1.02115	0.909778	-0.0542051	0.382	0.378	1
Mgat4b	0.746737	0.866453	0.526274	1.32628	0.565436	0.813695	0.814782	-0.0541688	0.273	0.274	1
March1	1.87594	1.66496	1.54453	1.60072	1.80825	1.88536	0.61424	-0.054015	0.498	0.464	1
Itgav	0.446062	0.472873	0.378312	0.373277	0.481254	0.572217	0.591728	-0.0539295	0.169	0.18	1
Gm43936	0.270486	0.251346	0.24198	0.108014	0.235415	0.524823	0.567434	-0.0538539	0.101	0.11	1
Dctn5	0.502855	0.603193	0.4619	0.757023	0.515839	0.592962	0.298131	-0.0537564	0.213	0.239	1
Purb	0.819881	1.00034	0.884978	1.1117	0.947184	0.956504	0.32811	-0.053689	0.319	0.348	1
Fkbp9	0.220982	0.30523	0.192485	0.297415	0.281287	0.301969	0.689132	-0.0535611	0.116	0.121	1
Sh3bp1	0.606176	0.336614	0.370231	0.611877	0.561546	0.279487	0.749261	-0.0534283	0.174	0.178	1
Mcub	0.944019	0.861806	1.17368	1.36278	1.03093	0.925014	0.461154	-0.0531915	0.331	0.344	1
Uso1	0.310682	0.280558	0.343082	0.530097	0.326689	0.3055	0.96384	-0.0530479	0.137	0.135	1
Smchd1	0.515315	0.780588	0.842503	0.862325	0.801664	0.710096	0.277762	-0.0530339	0.258	0.288	1
Itsn2	0.909327	0.904096	0.779958	0.876928	0.794339	1.196	0.574907	-0.052907	0.309	0.327	1
Bin3	0.280636	0.366852	0.352108	0.323508	0.312974	0.539443	0.552361	-0.0528104	0.142	0.151	1
Papss1	0.295597	0.180989	0.243088	0.279538	0.279843	0.285208	0.367692	-0.0527394	0.101	0.117	1
Rab22a	0.424093	0.510928	0.419747	0.779059	0.483044	0.388873	0.888917	-0.0527192	0.185	0.178	1
Cdk5rap3	0.149273	0.236646	0.248851	0.26758	0.31625	0.163796	0.837545	-0.0526948	0.102	0.098	1
Zmiz2	0.349592	0.205761	0.103561	0.246067	0.29012	0.226753	0.479834	-0.0526855	0.088	0.1	1
Hsd3b7	0.267076	0.173131	0.203579	0.196755	0.332882	0.170805	0.339707	-0.0526646	0.091	0.108	1
Mrpl21	0.321437	0.371091	0.320075	0.557688	0.235237	0.53265	0.746932	-0.0526233	0.145	0.153	1
Eloa	0.35108	0.323033	0.245642	0.405892	0.313984	0.390399	0.425207	-0.052603	0.134	0.151	1
Ambra1	0.403743	0.565373	0.421684	0.308863	0.530533	0.647981	0.855897	-0.0525762	0.195	0.194	1
C330007P06Rik	0.408997	0.226089	0.405064	0.413038	0.350322	0.433137	0.393689	-0.0525441	0.139	0.155	1
Wasl	0.457984	0.593	0.523139	0.787965	0.525299	0.561693	0.877597	-0.0524842	0.208	0.202	1
Dph3	0.572582	0.493016	0.621743	0.637039	0.757807	0.37731	0.906677	-0.0523669	0.208	0.211	1
Scaf8	0.349305	0.285846	0.185129	0.325522	0.319021	0.318079	0.287184	-0.0523622	0.112	0.135	1
Tubb6	0.729326	0.608538	0.856766	1.0585	0.726784	0.720214	0.458918	-0.0521229	0.261	0.27	1
Rnf139	0.172111	0.230837	0.254384	0.282475	0.266645	0.25274	0.372155	-0.0519018	0.091	0.106	1
Copg2	0.218491	0.279143	0.316224	0.388845	0.315713	0.282432	0.255262	-0.051827	0.109	0.131	1
Sh3bp2	0.389717	0.322196	0.343541	0.33488	0.435576	0.378738	0.218328	-0.0517014	0.139	0.166	1
Hpgds	2.10443	2.37898	1.90716	2.3336	2.29086	2.16694	0.476982	-0.0516973	0.557	0.568	1
Cep68	0.301245	0.346326	0.41437	0.410894	0.399742	0.405579	0.437358	-0.0515709	0.136	0.149	1
Acsl1	0.330938	0.350832	0.367067	0.418408	0.349303	0.466461	0.422464	-0.0515511	0.131	0.147	1
Scamp5	0.423163	0.356647	0.516603	0.576319	0.456901	0.457429	0.988322	-0.051551	0.18	0.178	1
Ctdsp2	0.787948	0.805077	0.762999	0.828002	0.761377	1.00858	0.837921	-0.0515244	0.304	0.297	1
Psma7	2.58162	2.40264	2.53693	2.60422	2.55861	2.74868	0.432937	-0.0514928	0.645	0.654	1
Nfic	0.987691	1.2819	1.04001	1.48528	1.24176	0.936851	0.729661	-0.0514224	0.365	0.376	1
2210016F16Rik	0.536253	0.300488	0.400121	0.533427	0.483841	0.360027	0.367569	-0.0513926	0.167	0.188	1
Oxct1	0.457472	0.781276	0.374435	0.955928	0.520383	0.542176	0.542641	-0.051391	0.187	0.2	1
2510039O18Rik	0.439227	0.301884	0.436521	0.323064	0.42899	0.517588	0.647713	-0.0513617	0.162	0.17	1
Cpsf3	0.311074	0.261591	0.281781	0.363045	0.333794	0.302228	0.187987	-0.051323	0.117	0.147	1
Nudcd3	1.02933	1.12754	0.838795	0.988052	1.18476	0.963554	0.89165	-0.051183	0.36	0.344	1
Traf3	0.269431	0.219923	0.270365	0.218095	0.328681	0.291744	0.527113	-0.0511337	0.093	0.104	1
Gm31522	0.233796	0.21998	0.242401	0.289789	0.292717	0.239354	0.303328	-0.0508127	0.083	0.1	1
Lta4h	0.24188	0.258734	0.220839	0.278596	0.340283	0.2044	0.926057	-0.0507819	0.101	0.096	1
Pggt1b	0.337521	0.317314	0.317535	0.343808	0.354044	0.413553	0.515257	-0.0505942	0.14	0.153	1
Fam32a	0.725773	1.19522	0.772594	0.948117	0.98571	1.01181	0.974198	-0.0505044	0.345	0.342	1
Myo1e	0.378074	0.507906	0.455587	0.718713	0.523154	0.342123	0.679448	-0.0504278	0.162	0.149	1
Otud5	0.414313	0.414468	0.403337	0.602027	0.432027	0.421559	0.278674	-0.05039	0.167	0.194	1
Khnyn	0.154638	0.224475	0.301687	0.264707	0.26325	0.288945	0.546479	-0.0503235	0.089	0.1	1
Arf3	0.602434	0.782231	0.726496	0.923137	0.792783	0.643272	0.427419	-0.0502788	0.264	0.284	1
Cmtm3	0.840049	0.84763	0.89232	0.916955	0.865784	1.02536	0.475637	-0.0502173	0.316	0.333	1
Usp14	0.330813	0.42805	0.296905	0.455648	0.443183	0.313009	0.733679	-0.0501451	0.144	0.151	1
St6gal1	1.59628	1.31745	1.17175	1.8218	1.30006	1.42573	0.577757	-0.0500457	0.438	0.401	1
Smu1	0.45125	0.397633	0.322858	0.458478	0.401008	0.487692	0.645254	-0.0500435	0.159	0.166	1
Tango2	0.194454	0.218111	0.264472	0.271796	0.238468	0.315596	0.602225	-0.0499697	0.096	0.104	1
Emsy	0.205667	0.240308	0.186278	0.309063	0.20088	0.308917	0.120783	-0.0498705	0.079	0.108	1
Tnfaip8	2.2986	1.96465	1.85273	1.92152	2.23891	2.10409	0.373888	-0.0498334	0.547	0.544	1
Prdm2	0.247288	0.425278	0.584626	0.673498	0.394738	0.473043	0.531094	-0.0497477	0.17	0.18	1
Atp6v0d1	1.86833	2.39487	1.70109	2.01794	2.10901	2.1993	0.174983	-0.0497304	0.554	0.599	1
Ago4	0.470033	0.32843	0.210764	0.586095	0.326933	0.340827	0.669441	-0.0497067	0.127	0.133	1
Dtx3l	0.222339	0.488938	0.274844	0.411569	0.318399	0.480879	0.166691	-0.0496928	0.121	0.151	1
Osbp	0.2713	0.238411	0.178052	0.344784	0.232024	0.29175	0.940973	-0.0496385	0.106	0.106	1
Tomm6	3.88126	2.09627	2.84752	3.09566	2.88101	3.16741	0.446432	-0.0496057	0.689	0.689	1
Rap1gds1	1.80335	1.47365	1.54955	1.76382	1.69377	1.63424	0.881987	-0.0495878	0.494	0.477	1
Ncf4	0.576547	0.605244	0.69357	0.879014	0.663324	0.590132	0.549977	-0.0494104	0.236	0.245	1
Gprc5c	0.259682	0.158532	0.28142	0.330903	0.254986	0.260418	0.695359	-0.0493762	0.096	0.102	1
Strn	0.245635	0.20397	0.280275	0.140436	0.368833	0.236613	0.974505	-0.0493291	0.106	0.106	1
Guk1	0.726046	0.460492	0.518839	0.540413	0.651444	0.597913	0.453951	-0.0492698	0.218	0.233	1
Psma4	1.1124	1.04101	1.0992	1.27389	1.08414	1.19031	0.537292	-0.0492248	0.364	0.374	1
Prxl2c	0.172359	0.523413	0.368776	0.236085	0.412471	0.528436	0.716424	-0.0491481	0.132	0.139	1
Paics	0.310476	0.480769	0.399968	0.360293	0.539451	0.369128	0.797057	-0.0491419	0.174	0.174	1
Rbm47	1.91342	2.31899	1.59838	1.90063	2.12102	2.08909	0.341667	-0.0491273	0.524	0.526	1
Nono	0.525731	0.982615	0.761168	0.994714	0.823739	0.756598	0.710013	-0.0490931	0.293	0.294	1
Poglut3	0.182985	0.279838	0.14184	0.224938	0.276428	0.217716	0.187311	-0.0490789	0.093	0.117	1
Sap18	0.78942	0.428544	0.891908	0.472905	0.814369	0.796026	0.956499	-0.0490487	0.26	0.252	1
Mfsd6	0.700365	0.864799	0.943873	0.700055	0.836083	1.13499	0.793031	-0.0489927	0.301	0.305	1
Tsg101	0.479388	0.535954	0.370449	0.686307	0.487616	0.459981	0.91366	-0.0489853	0.198	0.196	1
Ormdl2	0.573364	0.577239	0.474236	0.703925	0.44984	0.764191	0.92068	-0.0489786	0.225	0.215	1
Ggta1	0.333312	0.217204	0.273353	0.45683	0.282166	0.277957	0.502159	-0.0488721	0.107	0.121	1
Med11	0.152328	0.273257	0.258613	0.204338	0.33426	0.221987	0.570917	-0.0488572	0.101	0.112	1
Abl2	0.733191	0.984145	0.680113	1.15135	0.748933	0.902936	0.720484	-0.0487841	0.291	0.274	1
Rsrc1	0.777619	0.860082	0.989886	0.681903	1.00635	0.994316	0.890855	-0.0487151	0.312	0.301	1
Akr7a5	0.319669	0.234832	0.289721	0.450229	0.314019	0.256367	0.817971	-0.0486372	0.119	0.121	1
Gigyf2	0.415762	0.392903	0.331204	0.374785	0.456485	0.413229	0.835609	-0.0486134	0.15	0.155	1
Fam193a	0.396214	0.535108	0.513654	0.61984	0.493347	0.556621	0.755934	-0.0485984	0.208	0.211	1
Rnf149	0.303877	0.204757	0.342714	0.270834	0.374897	0.270275	0.265057	-0.04841	0.112	0.135	1
Ginm1	0.202779	0.23242	0.336069	0.297255	0.270557	0.346119	0.399353	-0.0482848	0.111	0.127	1
Atp11b	0.281805	0.24044	0.232402	0.22909	0.319682	0.289104	0.665444	-0.048247	0.111	0.117	1
Ciz1	0.276515	0.23862	0.264836	0.372788	0.276829	0.29636	0.513417	-0.0481554	0.111	0.123	1
Ncstn	0.486207	0.507063	0.642572	0.520392	0.585859	0.658975	0.569633	-0.0480973	0.218	0.227	1
Ttc32	0.349034	0.202053	0.171688	0.159775	0.311088	0.299437	0.513843	-0.0480554	0.093	0.104	1
Ppig	1.01253	1.0425	1.37821	1.18942	1.12831	1.36084	0.799988	-0.047855	0.388	0.366	1
Qrich1	0.345225	0.401936	0.379636	0.323301	0.39663	0.528922	0.872669	-0.0478549	0.159	0.151	1
Fam49a	0.482505	0.510479	0.402718	0.441113	0.505781	0.581089	0.710164	-0.0478032	0.179	0.186	1
Abcd1	0.439349	0.416453	0.367001	0.466177	0.518052	0.348189	0.761546	-0.0477973	0.174	0.178	1
Cebpd	1.8714	1.39325	1.98164	1.67619	1.80389	1.92423	0.367427	-0.0477622	0.46	0.485	1
Mtmr10	0.267453	0.22884	0.193821	0.570221	0.180029	0.232896	0.345121	-0.047673	0.098	0.115	1
Thrap3	0.738668	0.755558	0.759723	0.864425	0.750548	0.873305	0.423267	-0.0476491	0.273	0.295	1
Sde2	0.24201	0.339216	0.196074	0.421469	0.321462	0.213327	0.461661	-0.0476366	0.114	0.129	1
Smpd1	0.174531	0.227306	0.240864	0.272413	0.278378	0.211882	0.438507	-0.0475756	0.093	0.106	1
Phyhd1	0.33426	0.262487	0.227679	0.219973	0.370561	0.286659	0.839203	-0.0474985	0.124	0.117	1
Rps6ka5	0.244684	0.402957	0.268347	0.609957	0.278738	0.324765	0.476324	-0.0474587	0.119	0.133	1
Fam114a2	0.465675	0.518944	0.443954	0.470324	0.529701	0.561345	0.497677	-0.0474301	0.183	0.198	1
Rcan1	0.316496	0.282166	0.161429	0.281308	0.237011	0.397999	0.314517	-0.0472967	0.093	0.112	1
Snap29	0.247854	0.23795	0.290862	0.273538	0.30363	0.309411	0.865893	-0.0472781	0.109	0.112	1
Clec4a2	3.1219	2.60715	2.76481	2.63577	3.07284	2.91363	0.812809	-0.0472218	0.658	0.62	1
Ndfip2	0.596684	0.343914	0.487852	0.549509	0.548184	0.441076	0.75299	-0.0470518	0.188	0.192	1
Ankle2	0.242835	0.244942	0.268135	0.313026	0.332384	0.218632	0.37747	-0.0469326	0.106	0.123	1
Clec4d	0.217903	0.312128	0.360223	0.184049	0.384989	0.369192	0.930001	-0.0469093	0.106	0.106	1
Furin	0.536843	0.469084	0.379009	0.298021	0.673277	0.37581	0.532924	-0.0466982	0.192	0.17	1
Ube2d2a	1.61674	1.40908	1.37961	1.57403	1.37799	1.7868	0.759185	-0.0465291	0.474	0.45	1
Spaca6	0.524603	0.326616	0.408379	0.366624	0.4516	0.526389	0.887142	-0.0465291	0.172	0.168	1
Ube2s	1.15186	1.21731	1.27998	1.59305	1.21783	1.2211	0.629363	-0.0464611	0.402	0.368	1
Kif16b	0.33332	0.236724	0.338064	0.368815	0.373341	0.27186	0.648222	-0.0464031	0.124	0.131	1
Cenpx	1.6474	0.985243	1.22136	1.57572	1.42233	1.04943	0.535071	-0.0463603	0.425	0.44	1
Rogdi	0.33924	0.249856	0.174417	0.43391	0.241264	0.292021	0.775156	-0.0463444	0.107	0.112	1
Pcmtd2	0.168245	0.284197	0.392635	0.336457	0.27491	0.399258	0.945116	-0.04624	0.127	0.123	1
Wipf1	1.81874	2.12252	2.21224	2.17784	2.14722	2.16592	0.321198	-0.0462369	0.55	0.566	1
Itsn1	3.02392	2.56981	2.66173	3.33631	3.02216	2.30724	0.509914	-0.0461469	0.635	0.64	1
Kif3b	0.191205	0.226946	0.174247	0.162079	0.232454	0.293772	0.599727	-0.0461336	0.091	0.1	1
Gpr160	0.704548	0.381096	0.573472	0.852944	0.491654	0.587647	0.859746	-0.0460771	0.21	0.209	1
Dgkd	0.992916	0.803433	1.22104	1.01581	1.15822	0.926598	0.550924	-0.0460647	0.34	0.348	1
Tomm70a	0.256513	0.176794	0.302697	0.428355	0.22658	0.2789	0.631863	-0.045981	0.104	0.112	1
Srrm2	2.34338	2.44349	2.76925	3.35225	2.37979	2.59215	0.632025	-0.0459207	0.626	0.628	1
Ptpro	1.167	1.88779	1.52342	1.98191	1.46857	1.69238	0.631826	-0.0459077	0.466	0.464	1
Jund	8.11932	7.0146	8.86818	8.1315	8.09247	8.50478	0.720499	-0.045886	0.898	0.877	1
Mcee	0.585042	0.386562	0.366783	0.512008	0.338882	0.706189	0.860082	-0.0458079	0.19	0.188	1
Cnot4	0.953441	0.763886	0.717377	0.685839	0.987069	0.778677	0.651809	-0.04579	0.286	0.297	1
Cat	0.76748	0.896699	0.517173	0.725847	0.811456	0.802914	0.47698	-0.0457815	0.289	0.262	1
Taf15	0.476519	0.500814	0.505717	0.32176	0.60097	0.585786	0.9678	-0.0457652	0.192	0.19	1
Mapk3	0.779093	1.02989	0.849968	0.847151	0.927482	1.07277	0.971748	-0.0457377	0.329	0.319	1
Ncor1	1.47173	1.46644	1.22831	1.57885	1.36589	1.56634	0.694865	-0.0457084	0.428	0.427	1
Cdipt	0.435965	0.29471	0.431004	0.431854	0.403487	0.45617	0.508931	-0.0457081	0.164	0.176	1
Spast	0.436044	0.269898	0.240052	0.375721	0.352206	0.339756	0.208091	-0.0456547	0.111	0.135	1
Hnrnph1	1.41193	1.27757	1.39958	1.30601	1.31916	1.69031	0.858045	-0.0456266	0.421	0.413	1
Tslp	0.787124	0.456244	0.925273	0.838085	0.780101	0.682909	0.964474	-0.0455519	0.235	0.235	1
Cpt1a	1.06371	0.974602	0.931671	1.10222	1.04573	1.03017	0.781831	-0.0455209	0.354	0.36	1
Fam45a	0.225051	0.313553	0.168662	0.342221	0.229541	0.32303	0.577438	-0.045379	0.104	0.114	1
Ddi2	0.357531	0.547378	0.648588	0.525337	0.671079	0.43941	0.793352	-0.0453732	0.208	0.196	1
Mtmr3	0.738134	0.485508	0.717342	0.8029	0.654721	0.671294	0.886268	-0.0452813	0.238	0.231	1
Cmtr1	0.315335	0.212925	0.330628	0.336948	0.344762	0.27777	0.344084	-0.0452754	0.106	0.123	1
Apc	0.66593	0.765183	0.629719	1.14614	0.585077	0.758467	0.991805	-0.0452616	0.273	0.264	1
Pfdn1	0.894833	0.989822	0.94688	0.798436	1.09948	0.994427	0.943344	-0.0452526	0.349	0.339	1
Lsp1	1.0041	0.974165	0.892428	1.36062	0.809637	1.14583	0.561769	-0.0452428	0.24	0.26	1
Nr3c1	1.6437	1.76773	1.6023	1.69984	1.86446	1.63858	0.119855	-0.0451121	0.473	0.517	1
A630001G21Rik	0.40615	0.474325	0.40698	0.51121	0.436694	0.522495	0.942504	-0.0451045	0.175	0.172	1
Fau	50.8818	50.1323	52.3668	48.3864	53.4895	54.1363	0.303743	-0.045045	0.998	1	1
Pes1	0.251549	0.335619	0.219563	0.230307	0.341766	0.319051	0.678579	-0.0449908	0.126	0.131	1
B4galt6	1.00784	1.00333	0.945233	0.881204	1.00754	1.21656	0.283478	-0.0449427	0.339	0.372	1
Rnf10	0.349059	0.329374	0.372464	0.396545	0.471648	0.261531	0.729135	-0.0447765	0.139	0.145	1
Cox20	0.571543	0.331513	0.467387	0.438045	0.494509	0.523805	0.405964	-0.0446533	0.175	0.194	1
Arid1b	0.828519	1.02456	0.867383	0.868541	1.02034	0.968218	0.590881	-0.0445687	0.311	0.321	1
Sf3b3	0.266563	0.271439	0.387674	0.276676	0.403482	0.303163	0.798911	-0.0445125	0.126	0.119	1
Prpf39	0.197839	0.250544	0.354319	0.504432	0.264244	0.256509	0.764415	-0.0444969	0.112	0.117	1
Scamp2	2.35911	2.51442	2.36674	2.96225	2.53448	2.25259	0.418719	-0.0444763	0.626	0.65	1
Lrrc8d	0.871195	0.775314	0.981591	0.972419	0.96716	0.841047	0.713689	-0.044476	0.293	0.297	1
Stk4	0.675861	0.951286	0.732857	0.875057	0.806645	0.918264	0.578895	-0.0444634	0.273	0.284	1
Prpsap2	0.319476	0.190919	0.206632	0.326758	0.19443	0.366526	0.626954	-0.0444274	0.102	0.11	1
H2-M3	0.521233	0.491458	0.555076	0.419747	0.563033	0.666575	0.956559	-0.0443679	0.197	0.19	1
Mapkap1	0.399353	0.419755	0.315103	0.383037	0.427898	0.440422	0.395671	-0.044367	0.159	0.178	1
Tmem242	0.28535	0.298001	0.120809	0.140834	0.242586	0.411862	0.545062	-0.0443362	0.099	0.11	1
Nlk	0.498126	0.502465	0.58473	0.712692	0.590112	0.467544	0.866364	-0.0442813	0.2	0.202	1
Ncbp2	0.356977	0.398132	0.398224	0.375854	0.446878	0.43248	0.916107	-0.0442643	0.164	0.162	1
Gm34455	0.330631	0.541743	0.219009	0.325221	0.410948	0.484598	0.181188	-0.0442292	0.127	0.153	1
Ralb	0.733964	0.925205	0.624155	0.759066	0.828352	0.864166	0.871423	-0.0441876	0.286	0.272	1
Atp5c1	2.04433	1.89775	1.95577	1.87664	1.99928	2.24408	0.448747	-0.0441725	0.549	0.579	1
Gm26917	0.980769	1.07519	1.05172	1.29446	1.0556	1.06066	0.573749	-0.0441613	0.336	0.339	1
Uqcr10	3.49045	2.98518	2.93263	3.26526	3.18605	3.33976	0.246037	-0.0441155	0.709	0.722	1
Dhx15	0.609318	0.7832	0.73366	0.701456	0.809104	0.743217	0.773315	-0.0441097	0.276	0.258	1
Picalm	4.04902	3.51484	3.25074	3.91991	3.64562	3.7627	0.55391	-0.0439887	0.736	0.757	1
Nme4	0.248242	0.148584	0.346453	0.182963	0.333075	0.255444	0.76036	-0.0439607	0.109	0.112	1
Wwox	1.96391	1.46607	2.04656	2.82479	1.70893	1.60598	0.447115	-0.0439535	0.402	0.364	1
Tceal8	0.35087	0.497988	0.564208	0.555897	0.51411	0.508202	0.895855	-0.0439181	0.182	0.176	1
Hdac9	3.31665	3.26166	3.50073	3.81186	3.56058	3.17842	0.963012	-0.0437457	0.621	0.605	1
Pcnx3	0.274499	0.258663	0.173068	0.296192	0.295654	0.226671	0.703476	-0.0436919	0.101	0.108	1
Fam133b	0.431547	0.545993	0.395841	0.651714	0.434769	0.538362	0.982736	-0.0436077	0.19	0.184	1
Plau	0.223886	0.256354	0.0724259	0.306942	0.175018	0.252111	0.275777	-0.0434755	0.081	0.1	1
Pom121	0.177185	0.196256	0.223274	0.363084	0.19807	0.218427	0.36613	-0.0434474	0.091	0.108	1
Cct5	0.865773	0.893035	1.15995	1.12293	1.00283	1.01723	0.460491	-0.043428	0.354	0.37	1
Nup214	0.193947	0.26414	0.263815	0.444563	0.214938	0.285976	0.512214	-0.0434114	0.098	0.11	1
Dcaf8	0.625314	0.475751	0.802295	0.523494	0.654903	0.798064	0.651076	-0.0433921	0.243	0.25	1
Vcp	1.46912	1.64568	1.37776	1.70491	1.53169	1.59083	0.408537	-0.0432495	0.474	0.495	1
Aldh16a1	0.469787	0.27216	0.244004	0.412123	0.336872	0.374978	0.847823	-0.0431137	0.14	0.143	1
Ncor2	0.243443	0.366767	0.415493	0.38415	0.434753	0.309101	0.743171	-0.043109	0.147	0.151	1
Cndp2	1.5612	1.86362	1.45658	1.47676	2.00646	1.4192	0.933405	-0.0428926	0.489	0.491	1
Plekhm3	0.64027	0.984413	0.81834	1.04512	0.799783	0.914895	0.826187	-0.0428273	0.314	0.301	1
Pls3	0.436913	0.388104	0.293342	0.329863	0.472622	0.371925	0.357858	-0.0428246	0.139	0.157	1
Stard3	0.583593	0.299266	0.363163	0.433422	0.517672	0.3461	0.923183	-0.0427796	0.169	0.162	1
Mink1	0.527573	0.536466	0.441078	0.512203	0.524443	0.608975	0.732231	-0.0427753	0.205	0.192	1
Mboat7	0.265673	0.334154	0.210842	0.238415	0.377894	0.253143	0.702081	-0.0426784	0.107	0.112	1
Tspan31	0.784822	1.03105	0.786991	1.02513	0.864713	0.992046	0.489063	-0.0426117	0.324	0.342	1
Surf4	0.522189	0.6095	0.624386	0.703354	0.576952	0.687068	0.846348	-0.042601	0.245	0.241	1
Pard3b	0.485232	0.387821	0.355164	0.332011	0.437474	0.537851	0.983199	-0.042455	0.131	0.129	1
Mapk6	0.514994	0.891624	0.591053	0.799788	0.848666	0.50567	0.973198	-0.0424113	0.248	0.247	1
Cd72	0.613768	0.459068	0.470663	0.912297	0.532021	0.37337	0.911769	-0.0423511	0.162	0.162	1
Copa	0.666904	0.823148	0.933307	0.917706	0.759673	1.00017	0.776826	-0.0423448	0.306	0.295	1
Zfp131	0.220177	0.236864	0.242577	0.3118	0.269151	0.246787	0.822628	-0.0421857	0.101	0.104	1
Snrpa	0.393596	0.551106	0.4476	0.728042	0.44958	0.486571	0.677743	-0.0421344	0.188	0.196	1
Lrrc59	0.411214	0.431618	0.361319	0.645285	0.415534	0.368906	0.541381	-0.0420813	0.174	0.186	1
Rbbp7	0.597527	0.495864	0.541408	0.607323	0.575844	0.591412	0.909018	-0.0420219	0.208	0.209	1
Fkbp15	0.916916	0.671187	0.557661	0.743251	0.68428	0.889698	0.197266	-0.0420008	0.246	0.282	1
Tuft1	0.463056	0.318106	0.327929	0.56816	0.345766	0.401201	0.809839	-0.0419282	0.147	0.149	1
Kxd1	0.487759	0.576815	0.639298	0.542481	0.58577	0.708587	0.866238	-0.0418445	0.226	0.227	1
Rbpms	0.288518	0.378025	0.26135	0.18618	0.44423	0.307119	0.691317	-0.0417615	0.126	0.131	1
Magi1	0.352024	0.223252	0.470506	0.544137	0.34048	0.344673	0.994802	-0.0417465	0.111	0.11	1
Ndufaf8	0.67951	0.767057	0.944482	0.808223	0.947379	0.720407	0.871674	-0.0417128	0.309	0.299	1
Nfkbil1	0.269133	0.183531	0.365141	0.251439	0.211855	0.483711	0.390163	-0.0416612	0.102	0.117	1
Ncl	2.80115	3.33996	2.85638	3.33544	3.23054	2.87931	0.71558	-0.0416288	0.699	0.634	1
Atf6	0.900753	1.06424	0.864793	1.25163	0.960142	0.937027	0.433546	-0.0415938	0.312	0.335	1
Cfdp1	0.846461	1.14838	0.946186	0.936457	1.16103	0.945226	0.917457	-0.0415898	0.344	0.337	1
Eif3m	0.899771	0.77718	1.0644	1.0461	0.932188	0.957043	0.935352	-0.0415633	0.332	0.319	1
St3gal4	0.421527	0.280139	0.461813	0.445816	0.480171	0.312671	0.671587	-0.0415449	0.149	0.157	1
Senp7	0.385202	0.449882	0.382053	0.471798	0.494312	0.365426	0.205103	-0.041394	0.147	0.174	1
Exoc2	0.342985	0.234693	0.291534	0.327788	0.281391	0.385896	0.499288	-0.0413044	0.111	0.123	1
Xdh	0.820329	1.03104	1.08829	0.971883	1.16989	0.884992	0.574436	-0.0412053	0.337	0.348	1
Pik3ap1	1.23835	1.11519	1.08396	0.901596	1.25212	1.31195	0.820108	-0.0410492	0.398	0.376	1
Itgam	1.78671	1.9897	1.555	1.52502	2.01616	1.84753	0.970807	-0.0410433	0.507	0.487	1
Tfeb	0.239924	0.277181	0.261962	0.437751	0.282025	0.236854	0.865488	-0.0410367	0.109	0.112	1
Tnf	0.861204	0.891936	0.452149	0.91929	0.847643	0.628317	0.508311	-0.0409996	0.236	0.252	1
Brix1	0.249086	0.239003	0.14766	0.219907	0.157736	0.407433	0.261877	-0.0408181	0.086	0.106	1
Sar1b	0.629524	0.475995	0.421338	0.42166	0.55511	0.613609	0.64785	-0.0407315	0.212	0.221	1
Bola2	1.36538	1.68368	1.37549	1.16558	1.75175	1.49574	0.866007	-0.0407102	0.476	0.46	1
Ulk2	0.912665	1.18221	1.33566	1.06446	1.23835	1.25652	0.254062	-0.0406319	0.357	0.384	1
Lmbrd1	0.815377	0.759152	0.874111	0.910642	0.930882	0.731447	0.996426	-0.0406169	0.306	0.295	1
Ttc1	0.527399	0.559231	0.267778	0.59957	0.526035	0.39208	0.810337	-0.0404554	0.192	0.18	1
Ramp1	0.403051	0.321731	0.366024	0.277893	0.470614	0.358754	0.823715	-0.0403093	0.127	0.129	1
Mbtps1	0.245571	0.312742	0.204708	0.440855	0.245278	0.280816	0.116446	-0.0402275	0.101	0.133	1
Cwc25	0.18569	0.218436	0.364806	0.221446	0.282148	0.345765	0.726017	-0.040035	0.102	0.108	1
Stx17	0.300376	0.393034	0.290633	0.401764	0.340141	0.397565	0.878823	-0.0400225	0.14	0.133	1
Gbe1	0.295882	0.380902	0.446442	0.492131	0.378889	0.424916	0.829618	-0.040017	0.142	0.145	1
Ddx18	0.267432	0.569514	0.213921	0.373723	0.447465	0.350436	0.372816	-0.0400165	0.149	0.17	1
Txndc16	0.266134	0.279309	0.193016	0.193124	0.310818	0.292923	0.938194	-0.0399976	0.107	0.104	1
Tpk1	0.318783	0.506003	0.87872	0.658915	0.539774	0.699303	0.468153	-0.0399797	0.195	0.215	1
Arhgap30	1.47643	1.44471	1.63459	1.82834	1.44998	1.6531	0.573259	-0.0399008	0.478	0.474	1
Arf2	0.362985	0.558697	0.552142	0.815017	0.523407	0.397302	0.966047	-0.039786	0.19	0.188	1
Kmt2a	0.530194	0.537318	0.586513	0.564833	0.596841	0.607803	0.690685	-0.0397648	0.21	0.215	1
Slc35a3	0.223509	0.257206	0.223143	0.225505	0.259722	0.315299	0.873955	-0.0396923	0.102	0.104	1
Gas5	3.39485	3.49462	4.06152	3.17749	3.9296	3.88995	0.95068	-0.0395578	0.762	0.722	1
Fut8	0.301688	0.346101	0.462779	0.453386	0.476692	0.271155	0.747741	-0.0394993	0.152	0.141	1
Amn1	0.258468	0.396838	0.400343	0.53016	0.346024	0.386729	0.793485	-0.039478	0.136	0.141	1
Pias1	1.26311	1.49998	1.30916	1.52068	1.26663	1.64426	0.672824	-0.039452	0.423	0.431	1
Adap2	1.5348	1.49292	1.17784	2.01737	1.42717	1.21172	0.924401	-0.0394476	0.438	0.429	1
C030034L19Rik	0.249672	0.364133	0.447146	0.488991	0.308579	0.470258	0.577462	-0.0393108	0.129	0.115	1
Rpsa	14.9264	14.908	13.6142	15.8791	15.3704	13.651	0.605208	-0.0392775	0.977	0.978	1
Twistnb	0.453163	0.332084	0.477729	0.415087	0.412481	0.544227	0.900919	-0.0392771	0.17	0.162	1
Gm15417	0.303519	0.209624	0.3021	0.309164	0.326607	0.260123	0.534491	-0.0392453	0.109	0.123	1
Cryl1	0.691746	0.609889	0.479274	0.723288	0.622546	0.606791	0.972759	-0.0390917	0.235	0.229	1
Ndufa2	3.88189	3.50404	3.69398	3.78789	4.10352	3.34911	0.395007	-0.0390774	0.779	0.769	1
Fcgr3	7.10943	7.08286	6.64504	6.34863	7.12252	7.74137	0.724075	-0.0390493	0.916	0.898	1
Cox7a2	3.58119	3.36495	3.31849	3.10667	3.89041	3.23462	0.555365	-0.0389275	0.765	0.726	1
Srpr	0.505026	0.426388	0.365967	0.535221	0.473557	0.424249	0.718252	-0.0387201	0.182	0.168	1
Asnsd1	0.327608	0.175771	0.320947	0.134411	0.306677	0.397554	0.692229	-0.0386399	0.109	0.1	1
Ctnnbl1	0.264327	0.346453	0.29061	0.339149	0.318409	0.372171	0.911344	-0.0386295	0.134	0.127	1
Zswim8	0.228491	0.257111	0.214431	0.200491	0.252114	0.335143	0.407615	-0.0385873	0.094	0.11	1
Eif4e3	0.232454	0.267564	0.202539	0.266102	0.292953	0.23498	0.68426	-0.0385799	0.099	0.106	1
Stx18	0.23782	0.16675	0.284634	0.495495	0.236171	0.151678	0.614636	-0.0384249	0.101	0.11	1
Sp110	0.52044	0.325176	0.33726	0.467693	0.44088	0.375636	0.895116	-0.0384039	0.159	0.153	1
Trim26	0.549339	0.485371	0.448732	0.512498	0.607347	0.428233	0.850532	-0.038357	0.197	0.186	1
Tmem127	0.304419	0.310052	0.392892	0.544507	0.283667	0.403495	0.391469	-0.0383164	0.131	0.151	1
Rock2	1.74036	1.80332	1.68029	1.63646	1.81046	1.94275	0.549402	-0.0382877	0.517	0.513	1
Ccz1	0.351667	0.840392	0.372399	0.578094	0.637374	0.505227	0.898419	-0.0382602	0.21	0.207	1
Snrnp70	1.35426	1.80765	1.83053	2.13402	1.67079	1.64187	0.968823	-0.0382033	0.531	0.501	1
Psip1	0.267383	0.341513	0.190449	0.366154	0.285098	0.299443	0.440443	-0.0381731	0.101	0.114	1
Slc14a1	0.343851	0.414545	0.392071	0.448586	0.361723	0.50515	0.557289	-0.0381383	0.145	0.159	1
Brip1os	0.39257	0.376512	0.377757	0.432533	0.398573	0.442169	0.506052	-0.0380254	0.137	0.151	1
Irf3	0.243019	0.338173	0.379654	0.328287	0.42378	0.271181	0.673679	-0.0379453	0.129	0.137	1
Hat1	0.180588	0.384399	0.277429	0.21366	0.388298	0.285379	0.960101	-0.0378947	0.121	0.119	1
Flot1	0.572521	0.462637	0.499386	0.54127	0.476438	0.664792	0.795847	-0.0378932	0.197	0.202	1
Scamp1	0.532513	0.294717	0.453445	0.706927	0.403449	0.383756	0.666255	-0.0377847	0.157	0.166	1
Atf6b	0.273496	0.192772	0.214754	0.186387	0.258549	0.296107	0.905783	-0.0376962	0.102	0.104	1
Gabpb1	0.30742	0.291164	0.148855	0.17416	0.244619	0.412428	0.673206	-0.0376894	0.102	0.11	1
Rars	0.231265	0.309609	0.260502	0.186572	0.312612	0.361041	0.713015	-0.0376705	0.126	0.115	1
Usp3	0.453555	0.354887	0.553503	0.704756	0.437396	0.431666	0.783378	-0.0376236	0.18	0.17	1
Anxa11	0.292076	0.529111	0.430831	0.463459	0.496451	0.411906	0.828495	-0.0376008	0.179	0.18	1
Aldh3b1	0.341223	0.288364	0.383986	0.450362	0.339275	0.370378	0.487194	-0.0375971	0.134	0.147	1
Prrc2b	0.433992	0.445869	0.580373	0.41298	0.554675	0.543798	0.978735	-0.0375735	0.2	0.196	1
Arpc1a	0.878617	0.889216	1.06438	0.992619	0.886004	1.16325	0.882615	-0.0375177	0.34	0.344	1
Mlf2	0.700475	0.886049	0.501452	0.862883	0.749443	0.689235	0.511105	-0.0374505	0.264	0.282	1
Lrch3	0.428594	0.322196	0.350694	0.490612	0.373919	0.384291	0.391984	-0.0374398	0.142	0.162	1
Pigs	0.341863	0.32149	0.243718	0.438451	0.339423	0.271953	0.500295	-0.0374393	0.126	0.139	1
Map2k1	0.500926	0.584205	0.60224	0.440286	0.705963	0.546522	0.778821	-0.0371709	0.23	0.215	1
Atf7ip	0.571248	0.621036	0.464254	0.43111	0.703899	0.5263	0.789046	-0.0371143	0.215	0.205	1
Wwp2	0.531282	0.632154	0.518169	0.603552	0.533743	0.72209	0.778847	-0.0370225	0.22	0.223	1
Fam110b	0.354028	0.261738	0.173735	0.456047	0.312856	0.166911	0.37366	-0.036985	0.096	0.112	1
Elob	5.57714	4.20868	4.8053	4.70233	5.45573	4.34017	0.664731	-0.0368721	0.853	0.847	1
Rmnd1	0.17821	0.206345	0.240803	0.154082	0.286423	0.218567	0.710883	-0.0367962	0.094	0.1	1
[truncated: 3,659 more rows]

## Sheet: DEG_resimac_cASOvAPOC3 (LCMV)
Genes	APOC3-1	APOC3-2	APOC3-3	D-1	D-2	D-3	p_val	avg_log2FC	pct.1	pct.2	p_val_adj
Rpl41	3.30657	3.75001	3.78986	3.08274	3.57218	3.55677	3.28845e-18	0.361896	0.996	0.991	7.27932e-14
Rpl37a	3.64127	3.98936	4.15773	3.50011	3.87546	3.83588	1.91621e-17	0.357683	1	0.991	4.24172e-13
Rpl38	3.23418	3.40777	3.53459	2.92691	3.19015	3.27658	7.73201e-17	0.383824	0.996	0.996	1.71156e-12
Fkbp5	1.45447	1.53267	1.67728	1.26102	0.722884	1.09411	8.58038e-17	1.1617	0.617	0.448	1.89935e-12
Abca1	1.67252	1.85306	1.85553	2.21287	2.22902	2.25671	1.97053e-16	-0.658016	0.72	0.899	4.36196e-12
Uba52	1.59758	0.878711	0.958762	1.92685	1.62925	1.05806	1.12443e-13	-0.993483	0.416	0.618	2.48903e-09
Ttc39c	0.484015	0.814525	0.677824	0.0415907	0.183989	0.344354	2.24878e-12	1.96261	0.252	0.088	4.97789e-08
Coro1a	1.11952	0.8933	0.822356	1.11883	1.05805	1.31648	6.40628e-12	-0.721303	0.311	0.543	1.41809e-07
Ctsc	2.69903	2.78094	2.55767	2.9849	2.94579	2.84811	2.01401e-11	-0.336566	0.943	0.968	4.45822e-07
Rpl36	2.45385	2.95186	2.98337	2.33495	2.80117	2.74224	2.80945e-11	0.354296	0.952	0.948	6.21899e-07
Arl4c	0.513087	0.542919	0.595885	0.854342	1.0131	0.975124	3.97647e-11	-1.11197	0.221	0.416	8.80232e-07
Rps29	4.51771	4.74632	4.80723	4.33427	4.63563	4.64402	4.62012e-11	0.23649	1	0.998	1.02271e-06
Igkc	0	0.0302306	0.0426327	0.0384573	0.282377	0.639011	5.58739e-11	-3.96146	0.011	0.105	1.23683e-06
Rpl35a	3.36173	3.65857	3.76679	3.00349	3.65521	3.52834	5.68016e-11	0.266868	0.994	0.994	1.25736e-06
Ifi27l2a	2.64037	2.72554	2.81552	2.89952	2.09447	2.0162	8.57644e-11	0.814064	0.799	0.715	1.89848e-06
Rps28	3.61233	3.88513	3.93359	3.42586	3.78871	3.76445	1.12676e-10	0.242771	0.996	0.991	2.49419e-06
Rps27	3.09124	3.50888	3.5693	2.85379	3.43697	3.34909	1.47062e-10	0.29123	0.982	0.976	3.25536e-06
Gatm	0.675301	0.810282	0.812688	1.21629	1.12078	1.18536	4.65706e-10	-0.845352	0.322	0.532	1.03089e-05
Chp2	0.711165	0.443732	0.457674	1.26502	0.664178	0.609723	4.68352e-10	-0.937791	0.169	0.352	1.03674e-05
Cd300ld	1.04349	0.873723	0.715427	1.69915	1.03731	0.984853	5.94205e-10	-0.768067	0.315	0.506	1.31533e-05
Ccr5	0.435896	0.723794	0.715273	1.16514	1.10878	1.0991	7.19914e-10	-0.998369	0.212	0.388	1.5936e-05
S100a10	1.83778	1.93869	2.20194	1.47634	1.67667	1.60442	1.6854e-09	0.761033	0.727	0.67	3.7308e-05
Aif1	1.33394	1.13491	0.975916	1.65301	1.3939	1.20807	2.99796e-09	-0.55747	0.42	0.633	6.63629e-05
Mir142hg	1.13936	1.3524	1.16658	1.30867	1.53967	1.60979	3.10546e-09	-0.532674	0.477	0.682	6.87425e-05
Rgs2	1.06807	1.19047	1.00945	1.19874	1.38582	1.47656	4.18589e-09	-0.597155	0.357	0.539	9.26589e-05
Mt1	2.51974	3.83759	3.61334	2.78001	3.54245	3.20066	4.65474e-09	0.61289	0.958	0.944	0.000103037
Rps26	2.61161	2.81197	2.95302	2.3378	2.68056	2.69637	5.91645e-09	0.342265	0.959	0.953	0.000130967
Rpl37	3.12943	3.35878	3.46456	2.89731	3.31101	3.23401	9.01258e-09	0.264124	0.989	0.983	0.000199502
Abhd12	1.31492	1.16309	1.01382	1.31714	1.20248	1.41981	9.19401e-09	-0.448562	0.462	0.687	0.000203519
Zbtb16	0.527204	0.806682	0.743566	0.434633	0.270632	0.377247	1.04511e-08	1.44434	0.291	0.155	0.000231345
Tsc22d3	1.7324	1.75111	2.05857	1.20759	1.33368	1.62461	1.81617e-08	0.748763	0.715	0.657	0.000402028
Jaml	0.499662	0.595827	0.559751	0.0400327	0.107506	0.185752	1.95959e-08	2.38905	0.173	0.062	0.000433776
Hgsnat	0.836721	0.946492	1.06027	1.36557	1.41995	1.22712	1.99741e-08	-0.697973	0.368	0.547	0.000442147
Lars2	1.15618	0.631631	0.665385	2.14424	0.784353	0.764081	2.36436e-08	-1.13644	0.284	0.438	0.000523375
Ccl9	2.75245	2.29629	2.64099	1.95625	2.21413	2.21867	3.17598e-08	0.492594	0.853	0.807	0.000703035
Gpr34	1.08116	0.943531	0.678747	1.04756	1.15198	1.09947	3.84531e-08	-0.603967	0.33	0.519	0.000851197
Gm26917	3.18541	1.24613	1.51711	1.40996	0.604581	0.753181	4.74523e-08	1.66402	0.47	0.361	0.00105041
Cx3cr1	1.18692	1.15115	0.69226	0.706068	1.19817	1.55004	5.5996e-08	-0.739726	0.223	0.386	0.00123953
Lcp1	2.17646	1.96781	1.92656	2.33174	2.09935	2.20075	7.4421e-08	-0.369609	0.801	0.897	0.00164738
Ms4a6c	2.54489	2.24886	2.49626	2.0817	2.03751	2.22977	9.21701e-08	0.382739	0.89	0.897	0.00204028
Entpd1	1.10527	0.79275	0.811745	1.3111	0.977698	1.05581	9.23859e-08	-0.595084	0.348	0.543	0.00204505
Basp1	0.481393	0.552938	0.383426	0.710314	0.648542	0.786333	9.65888e-08	-0.797595	0.173	0.324	0.00213809
Il1b	0.857568	0.26173	0.0695429	0.979762	0.699226	0.51081	9.91756e-08	-1.8085	0.039	0.131	0.00219535
Slc8a1	2.02108	1.6648	1.50832	2.06294	1.91489	1.91787	1.0905e-07	-0.541309	0.615	0.762	0.00241393
Mpeg1	1.44303	1.09815	0.965215	1.46401	1.35028	1.28965	1.11767e-07	-0.556832	0.387	0.575	0.00247407
Slc37a2	0.331767	0.38174	0.251487	0.538081	0.625237	0.602578	1.29458e-07	-1.09629	0.131	0.266	0.00286568
Lifr	1.67631	1.78836	1.96701	1.45858	1.49075	1.62676	1.51874e-07	0.541102	0.757	0.693	0.00336189
Ckb	0.488265	0.710053	0.433928	0.927703	0.766419	0.918299	1.70779e-07	-0.791105	0.228	0.386	0.00378036
Cog6	0.150067	0.0545197	0.135123	0.219519	0.167701	0.278375	1.98205e-07	-1.36196	0.029	0.114	0.00438746
Lyve1	2.72464	2.48797	2.63274	2.44917	2.02471	2.25337	2.01641e-07	0.559455	0.788	0.719	0.00446353
Nr4a1	0.835623	1.16047	0.788959	1.16795	1.42196	1.21991	2.05127e-07	-0.613936	0.313	0.496	0.00454069
Ppfibp2	0.0850179	0.174558	0.0586582	0.398501	0.23465	0.246545	2.05463e-07	-1.24461	0.037	0.127	0.00454813
Cd36	2.02338	2.19139	2.16223	2.43384	2.37142	2.42258	2.08878e-07	-0.38154	0.731	0.852	0.00462373
Ocrl	0.706184	0.413888	0.415033	0.556326	0.69932	0.679728	2.25084e-07	-0.799463	0.173	0.326	0.00498247
Tmem140	0.113332	0.186414	0.195245	0.500533	0.242584	0.397352	2.35157e-07	-1.09846	0.066	0.174	0.00520544
Tnf	1.07452	0.826319	0.706237	1.26158	1.10863	1.04379	2.44101e-07	-0.729813	0.28	0.446	0.00540342
Zscan26	0.442855	0.229147	0.255994	0.51534	0.440445	0.427811	2.60614e-07	-0.949264	0.105	0.23	0.00576895
Wfdc17	2.85366	3.24907	3.60375	2.56086	2.92489	2.9037	2.71464e-07	0.805541	0.869	0.83	0.00600913
Klf4	1.63215	2.23935	2.45864	1.57184	2.11912	1.9434	3.86878e-07	0.574877	0.783	0.704	0.00856392
Cela1	0	0.155901	0.0516776	0.527107	0.188717	0.196228	4.25203e-07	-1.39605	0.039	0.127	0.0094123
Tgif1	0.383112	0.723798	0.514309	0.753134	0.981207	0.844001	4.35107e-07	-0.717081	0.23	0.391	0.00963153
Specc1	0.668138	0.530137	0.418945	0.81376	0.694487	0.662577	4.67281e-07	-0.662667	0.212	0.363	0.0103437
Bcl2a1b	0.465608	0.783654	0.540778	0.493121	0.835063	1.00037	5.38304e-07	-0.55956	0.227	0.384	0.0119159
Calm2	2.07605	1.83928	1.89318	1.96479	2.01341	2.2149	5.43564e-07	-0.387383	0.785	0.888	0.0120323
Hpgd	1.39428	1.41804	1.28631	1.73627	1.5511	1.55761	5.67118e-07	-0.418375	0.495	0.68	0.0125537
Tanc2	1.25119	1.1102	1.07073	1.28474	1.30034	1.41616	5.96622e-07	-0.517431	0.457	0.609	0.0132068
Cltc	2.34728	2.26749	2.31615	2.52147	2.46066	2.4797	6.14982e-07	-0.29604	0.913	0.948	0.0136133
Cyba	2.02866	1.87666	1.75069	1.89525	2.05542	2.12584	6.84296e-07	-0.39014	0.737	0.858	0.0151476
Gramd1b	0.114899	0.227806	0.16711	0.518548	0.353686	0.362936	7.27179e-07	-1.12018	0.074	0.178	0.0160968
Med9	0.0410891	0.0626253	0.064645	0.295089	0.169837	0.240263	9.03215e-07	-1.94995	0.028	0.103	0.0199936
Zfp516	0.118404	0.342292	0.3927	0.519523	0.515083	0.492464	9.57367e-07	-0.637971	0.131	0.264	0.0211923
Snx24	1.00924	1.03077	0.920663	1.20877	1.18494	1.25969	1.1131e-06	-0.52311	0.403	0.567	0.0246397
Mcrip1	0.478722	0.492837	0.61552	0.801449	0.706506	0.834395	1.1269e-06	-0.716892	0.238	0.388	0.0249451
Got1	0.370504	0.342158	0.348679	0.612409	0.528973	0.561858	1.2055e-06	-0.850629	0.129	0.253	0.0266849
Cxcl16	1.04358	1.05043	0.808807	1.38193	1.13907	1.13428	1.23481e-06	-0.49648	0.381	0.56	0.0273338
Gm15564	0.314483	0.1581	0.0898773	1.19855	0.183778	0.163827	1.31602e-06	-1.78965	0.052	0.142	0.0291315
Fth1	4.15246	4.12671	4.03862	4.24016	4.26089	4.17639	1.49335e-06	-0.183195	1	0.996	0.0330568
Marcks	2.21507	2.44704	2.08195	2.33857	2.58676	2.42299	1.51466e-06	-0.283871	0.862	0.914	0.0335284
Zfp36	2.47831	3.52628	3.31945	2.42099	3.44837	3.11224	1.59274e-06	0.340676	0.956	0.94	0.0352569
Mgat4a	0.365074	0.363006	0.239977	0.620389	0.364453	0.554125	1.63384e-06	-0.831275	0.123	0.247	0.0361666
Zdhhc14	1.47734	1.19333	1.16172	1.55406	1.37174	1.3366	1.64455e-06	-0.369595	0.486	0.657	0.0364037
Tmsb4x	4.79115	4.74729	4.65285	4.64193	4.88787	4.82032	1.70495e-06	-0.15673	0.998	1	0.0377408
S100a1	0.530753	0.618833	0.43484	0.707082	0.798819	0.758491	1.7214e-06	-0.68468	0.23	0.38	0.0381049
Ralgps2	0.356201	0.256443	0.167816	0.602083	0.407744	0.341127	2.29075e-06	-0.991838	0.094	0.202	0.050708
Tmem86a	0.157915	0.335967	0.169342	0.267451	0.392607	0.55757	2.36863e-06	-0.987434	0.107	0.217	0.0524319
Tspan4	0.472381	0.50408	0.308425	0.528601	0.587773	0.622541	2.42079e-06	-0.627275	0.162	0.296	0.0535867
Zswim6	1.90798	1.44428	1.48755	1.68364	1.58643	1.72279	2.44889e-06	-0.312679	0.626	0.775	0.0542087
Hpgds	0.976708	1.1444	0.988802	1.45523	1.28821	1.26556	2.55246e-06	-0.488581	0.453	0.622	0.0565013
Snw1	0.46688	0.340164	0.398691	0.637302	0.493154	0.645804	2.75292e-06	-0.836958	0.166	0.29	0.0609385
Lpin2	0.503769	0.446085	0.485016	0.849266	0.561413	0.634655	2.94626e-06	-0.615763	0.177	0.309	0.0652183
Polr2e	0.481813	0.46702	0.377257	0.478724	0.583325	0.651944	3.06024e-06	-0.616596	0.175	0.313	0.0677414
5033421B08Rik	0.716398	0.484595	0.433636	0.905105	0.540108	0.671135	3.06939e-06	-0.631114	0.173	0.309	0.0679441
Phyh	0.2254	0.163753	0.112969	0.379127	0.330838	0.297718	3.20405e-06	-1.26224	0.066	0.159	0.0709249
Snx6	1.1179	0.908072	0.863592	1.41845	0.984494	1.07384	3.26194e-06	-0.465708	0.381	0.541	0.0722063
Clec12a	0.355479	0.878427	0.593068	0.845293	0.888371	0.893176	3.80438e-06	-0.379959	0.269	0.436	0.0842137
Abcc3	0.507683	0.324621	0.503236	0.313298	0.461495	0.625996	4.08877e-06	-0.420918	0.138	0.26	0.0905091
Bank1	0.84068	0.716993	0.540935	1.07181	0.945642	0.787638	4.13541e-06	-0.643156	0.245	0.384	0.0915415
Donson	0	0.0778699	0.0787078	0.315474	0.187229	0.174053	4.20815e-06	-1.53538	0.029	0.101	0.0931515
Cd37	0.443877	0.612114	0.571752	0.702242	0.714824	0.781905	4.5955e-06	-0.479536	0.239	0.388	0.101726
Parp8	0.545316	0.654082	0.403504	0.674733	0.704863	0.780411	5.21081e-06	-0.581074	0.212	0.354	0.115347
Cdip1	0.511672	0.279674	0.32431	0.32848	0.437209	0.456989	5.2921e-06	-0.539286	0.112	0.232	0.117146
Sdccag8	0.579523	0.338075	0.316672	0.506461	0.347898	0.558679	5.62553e-06	-0.578016	0.122	0.242	0.124527
Ahcyl2	0.32785	0.458614	0.419974	0.739938	0.588576	0.532368	5.96062e-06	-0.554382	0.166	0.296	0.131944
Nfe2l2	1.45087	1.48911	1.34317	1.6559	1.61602	1.59174	6.42343e-06	-0.339226	0.595	0.742	0.142189
Zfp703	0.589895	0.715402	0.852801	0.86502	0.993998	1.07142	6.86897e-06	-0.60088	0.297	0.451	0.152052
Arpc5	1.91038	1.39472	1.49189	1.88118	1.58866	1.64465	8.11571e-06	-0.347514	0.619	0.788	0.179649
Fcgr4	0	0.0450735	0.0847021	0.375249	0.241788	0.133647	8.16549e-06	-1.93087	0.031	0.099	0.180751
Lpcat2	0.542401	0.350509	0.139228	0.281552	0.443298	0.515206	8.64301e-06	-0.834105	0.101	0.206	0.191322
Nacc2	0.324649	0.38256	0.439572	0.765535	0.485774	0.567266	8.65402e-06	-0.641201	0.166	0.296	0.191565
Pirb	0.925042	0.774753	0.80465	1.05108	1.04532	0.922947	8.95451e-06	-0.46619	0.32	0.479	0.198217
Gm10134	0.701302	0.400857	0.452229	0.487434	0.601706	0.676211	9.02351e-06	-0.624964	0.173	0.303	0.199744
Per2	0.0868616	0.300499	0.268458	0.0256264	0.100862	0.0586105	9.1886e-06	2.122	0.099	0.03	0.203399
Rasal2	0.565601	0.626175	0.598693	0.767648	0.885606	0.704746	9.29171e-06	-0.491863	0.212	0.348	0.205681
Igf1	1.72606	1.80585	1.52189	2.04827	1.75932	1.82371	9.9348e-06	-0.265245	0.692	0.815	0.219917
Cd180	0.221646	0.369112	0.200416	0.554198	0.425803	0.421406	1.01533e-05	-0.726031	0.114	0.225	0.224754
Il6st	0.302214	0.356871	0.47266	0.498075	0.576515	0.562479	1.02594e-05	-0.580396	0.16	0.29	0.227102
Dnajb14	0.444975	0.527432	0.401344	0.701846	0.675901	0.650025	1.0571e-05	-0.658922	0.201	0.33	0.234001
Snx17	0.827158	0.519895	0.54909	0.875296	0.771509	0.648835	1.08516e-05	-0.540078	0.252	0.395	0.240212
Rreb1	1.43833	1.0512	1.09016	1.53195	1.18809	1.34199	1.0967e-05	-0.470189	0.451	0.614	0.242766
Klf9	0.898202	1.21791	1.39228	1.17976	0.863371	0.942607	1.09792e-05	0.690766	0.519	0.423	0.243036
Fyb	1.43423	1.2588	1.24117	1.69682	1.40326	1.41259	1.1045e-05	-0.382383	0.53	0.704	0.244492
Arhgap10	0.91162	0.558156	0.476747	0.967694	0.644845	0.501895	1.13217e-05	-0.284615	0.186	0.324	0.250618
Dapp1	0.0535076	0.279557	0.31297	0.451126	0.359941	0.561393	1.14085e-05	-0.910785	0.116	0.221	0.252538
Cd38	0.952966	1.06047	0.995916	1.41418	1.1922	1.31393	1.15308e-05	-0.55492	0.394	0.543	0.255245
Rnf180	0.470596	0.603936	0.431079	0.492705	0.575875	0.780425	1.16489e-05	-0.464534	0.193	0.326	0.257859
Hist1h4i	0.1656	0.116392	0.206617	0.23955	0.232643	0.347205	1.17374e-05	-0.969981	0.057	0.142	0.25982
Tmem273	0.0938623	0.0901528	0.0646967	0.211339	0.228969	0.145689	1.19665e-05	-1.28571	0.029	0.097	0.26489
Itm2b	3.39326	3.44628	3.30384	3.62305	3.43498	3.51367	1.21942e-05	-0.180036	0.993	0.998	0.269931
Rpl18	1.92033	2.31677	2.38321	1.7653	2.25673	2.17826	1.22621e-05	0.278785	0.89	0.869	0.271434
Gda	1.81937	1.48426	1.69417	1.32743	1.08156	1.28084	1.22736e-05	0.722196	0.523	0.438	0.271689
Ndufb8	0.807095	0.751748	0.832243	0.873166	0.945808	0.978311	1.25822e-05	-0.3993	0.348	0.509	0.27852
Rps21	3.06629	3.37154	3.44091	3.18427	3.3675	3.20116	1.26938e-05	0.187793	0.987	0.983	0.28099
Scaper	0.0538407	0.20307	0.187469	0.311401	0.325043	0.431574	1.33567e-05	-1.14211	0.072	0.159	0.295664
Mtus1	0.155744	0.277916	0.234353	0.218412	0.345151	0.482751	1.37076e-05	-0.762969	0.094	0.193	0.303431
Cd300a	1.00795	0.897391	0.684764	1.05724	0.861753	1.07024	1.39517e-05	-0.434317	0.337	0.496	0.308834
Lst1	0.795986	0.936586	0.52242	1.01588	0.969861	0.824012	1.471e-05	-0.349841	0.263	0.418	0.32562
Tspan3	0.59352	0.587232	0.532728	0.845116	0.767249	0.799781	1.47883e-05	-0.679426	0.241	0.38	0.327353
Znrf2	0.638528	0.610147	0.681663	1.03089	0.709753	0.797954	1.52943e-05	-0.467744	0.254	0.399	0.338556
Irf8	0.692155	0.693573	0.622345	0.912753	0.834547	0.832419	1.58644e-05	-0.498115	0.28	0.431	0.351174
Spag9	1.05269	1.19419	1.04587	1.34529	1.44742	1.21556	1.6386e-05	-0.404838	0.464	0.618	0.362721
4933406I18Rik	0.548537	0.45705	0.316139	0.518058	0.560826	0.643241	1.66456e-05	-0.700726	0.153	0.264	0.368467
Bclaf3	0.0871432	0.0720217	0.0347215	0.178517	0.234775	0.114939	1.69949e-05	-1.6099	0.026	0.088	0.376199
Hsd17b10	0.274826	0.206755	0.168909	0.260245	0.341783	0.35331	1.74231e-05	-0.87929	0.083	0.176	0.385678
Cct3	0.547145	0.331683	0.365803	0.476176	0.57866	0.523352	1.74911e-05	-0.703285	0.157	0.275	0.387183
Limd2	0.197926	0.23986	0.294431	0.424429	0.435786	0.351037	1.88399e-05	-0.689609	0.11	0.217	0.417039
Gm10076	2.12614	1.14643	1.42426	2.37337	1.56437	1.26884	1.92629e-05	-0.506127	0.582	0.71	0.426404
Ago4	0.159834	0.228171	0.167664	0.338909	0.415915	0.309892	1.94717e-05	-0.940171	0.066	0.152	0.431026
Frmd4b	2.14247	2.10182	2.29694	1.99247	1.79141	2.09614	2.05838e-05	0.345008	0.849	0.815	0.455642
Simc1	0.561299	0.103606	0.251439	0.533831	0.26282	0.377936	2.10715e-05	-0.974373	0.076	0.163	0.466438
Hacd4	0.637857	0.939584	0.782793	0.928595	0.956902	1.11312	2.1715e-05	-0.411717	0.359	0.509	0.480682
Cd300lb	0.208996	0.149933	0.122246	0.20506	0.292174	0.349955	2.24394e-05	-1.23166	0.064	0.146	0.496718
Rnf150	1.70046	1.31944	1.27756	1.65808	1.48959	1.51123	2.27514e-05	-0.375267	0.551	0.68	0.503625
Mylip	0.685954	0.970325	1.02884	1.15746	1.18864	1.31416	2.32706e-05	-0.575348	0.42	0.552	0.515118
Retnla	0.220535	0.694187	1.31361	0.32567	0.228723	0.542913	2.32823e-05	1.73325	0.099	0.032	0.515376
Fgfr1	1.08685	1.09337	1.44627	1.04154	0.883095	0.9352	2.42695e-05	0.702402	0.497	0.412	0.537229
AU020206	0.277974	0.298551	0.169274	0.346383	0.393237	0.424413	2.43746e-05	-0.833313	0.094	0.189	0.539555
Hs6st1	0.467762	0.360263	0.291771	0.455572	0.456961	0.51484	2.51708e-05	-0.629974	0.136	0.249	0.557181
Tgfbi	2.44425	2.25973	2.3868	2.19581	2.18605	2.104	2.73643e-05	0.289843	0.91	0.906	0.605736
Cib2	0.0410891	0.138238	0.155161	0.106955	0.265505	0.312226	2.90136e-05	-1.0141	0.05	0.124	0.642244
Pxn	0.61892	0.686203	0.643135	0.833002	0.851484	0.832423	2.91892e-05	-0.479637	0.287	0.429	0.646133
Ccr1	1.16483	0.98165	0.929245	1.12763	1.0552	1.29762	2.97797e-05	-0.480006	0.348	0.491	0.659203
Trio	0.505661	0.494935	0.581663	0.708559	0.623699	0.668423	3.01266e-05	-0.405903	0.21	0.348	0.666883
Foxj3	0.236265	0.174653	0.145945	0.706478	0.275977	0.362429	3.11913e-05	-1.42337	0.074	0.159	0.690452
Rhog	0.874571	0.802898	0.778207	1.01595	0.915793	1.00135	3.15227e-05	-0.436405	0.341	0.496	0.697787
Bst1	0.278711	0.148945	0.316477	0.412861	0.483272	0.372793	3.16554e-05	-0.99321	0.09	0.18	0.700723
Esrra	0.172881	0.221516	0.308632	0.273828	0.30006	0.500985	3.17014e-05	-0.747086	0.092	0.185	0.701742
Ifi207	2.12387	2.20979	2.10286	2.05692	2.04801	1.87065	3.20649e-05	0.320501	0.845	0.811	0.709788
Arl11	0.257589	0.236479	0.178199	0.33179	0.209787	0.430892	3.20871e-05	-0.777149	0.083	0.174	0.710281
Pou2f2	0.563147	0.799472	0.596706	1.04836	0.743416	0.86052	3.23226e-05	-0.402755	0.267	0.416	0.715492
Cbx4	0.772431	0.314881	0.27112	0.487015	0.507346	0.523904	3.24984e-05	-0.758798	0.12	0.221	0.719385
Plin2	1.87387	1.8211	1.61041	2.09484	1.90426	1.89263	3.25971e-05	-0.327968	0.726	0.809	0.721569
Serpinb6a	1.53545	1.44509	1.36863	1.84296	1.46792	1.59125	3.306e-05	-0.327608	0.611	0.734	0.731816
Ccnd3	1.26826	1.19825	1.42425	1.34531	0.870097	0.887091	3.33047e-05	0.713223	0.521	0.451	0.737233
Scn1b	0.371247	0.348714	0.239014	0.721241	0.55983	0.324869	3.39717e-05	-0.792974	0.114	0.217	0.751998
Orai1	0.511459	0.435747	0.583847	0.708225	0.665195	0.710423	3.45518e-05	-0.60515	0.206	0.333	0.764839
Cuedc2	0.594595	0.32089	0.425884	0.44908	0.587355	0.623515	3.58666e-05	-0.754986	0.169	0.285	0.793943
Tmx4	0.401706	0.373179	0.260444	0.607804	0.481292	0.413144	3.59309e-05	-0.624177	0.11	0.21	0.795367
Itpkb	0.815663	0.535507	0.583869	0.93623	0.71947	0.7315	3.68579e-05	-0.554458	0.234	0.365	0.815888
Ncoa7	0.86761	0.378574	0.334218	0.678417	0.510621	0.536681	3.82242e-05	-0.583584	0.157	0.275	0.84613
Lyrm9	0.0587927	0.0299295	0.0245779	0.0904284	0.086773	0.111698	3.82308e-05	-1.75113	0.009	0.054	0.846276
Arf3	0.478572	0.433923	0.628683	0.623475	0.733447	0.720226	3.82882e-05	-0.585565	0.234	0.371	0.847547
Clec4a3	1.05292	0.997345	0.817705	1.19957	1.1368	1.04241	3.87749e-05	-0.39303	0.394	0.536	0.858321
Zfp608	0.489402	0.23512	0.338693	0.404829	0.482671	0.482875	3.89658e-05	-0.791768	0.112	0.208	0.862548
Rab43	0.691947	0.500283	0.564193	0.983666	0.679517	0.713314	3.99816e-05	-0.638836	0.228	0.358	0.885033
Elk3	0.592531	0.720985	0.642348	0.892836	0.826924	0.866121	4.13624e-05	-0.475692	0.28	0.423	0.915599
Nfkbiz	2.05469	2.63519	2.30789	1.8875	2.55201	2.13832	4.18472e-05	0.324681	0.851	0.828	0.926329
BC004004	0.315181	0.288048	0.281564	0.564748	0.481809	0.401837	4.3213e-05	-0.800478	0.123	0.223	0.956564
0610009B22Rik	0.0682865	0.111346	0.210765	0.146717	0.202291	0.129941	0.828664	-0.0633932	0.076	0.079	1
0610009E02Rik	0.0976319	0.0270582	0.0356655	0	0.0130597	0.0182149	0.563297	1.25871	0.015	0.011	1
0610009L18Rik	0.161629	0.11331	0.104786	0.338986	0.226399	0.135683	0.0224023	-0.901605	0.055	0.092	1
0610010F05Rik	0.498201	0.403867	0.438769	0.3399	0.217335	0.206808	0.00958259	1.0078	0.179	0.129	1
0610010K14Rik	0.432234	0.531099	0.452234	0.39803	0.491814	0.460131	0.554177	0.114427	0.214	0.24	1
0610012G03Rik	0.640039	0.701465	0.677217	0.732443	0.742522	0.570242	0.626719	0.080656	0.317	0.358	1
0610030E20Rik	0.310736	0.155729	0.21012	0.157308	0.290697	0.22602	0.0494354	-0.369508	0.087	0.127	1
0610040B10Rik	0.131421	0.214407	0.143032	0.0704477	0.0744115	0.136183	0.120107	0.819672	0.064	0.043	1
0610040J01Rik	0.111022	0.142159	0.176765	0.143827	0.180394	0.241991	0.0290127	-0.441519	0.053	0.09	1
0610043K17Rik	0.0370045	0.108893	0.0862325	0.107504	0.0369769	0.11872	0.443862	0.0898549	0.031	0.041	1
1110002J07Rik	0	0.0524712	0.00417349	0.0151067	0.00796477	0.0286611	0.179289	0.527364	0.004	0.011	1
1110002L01Rik	0	0.0433605	0.045679	0.0566858	0.0665731	0.0374823	0.577347	-0.288805	0.017	0.021	1
1110004F10Rik	0.829963	0.52745	0.593249	0.560014	0.510223	0.644383	0.252884	-0.0289533	0.26	0.309	1
1110008P14Rik	0.534757	0.291405	0.249576	0.283047	0.236327	0.289412	0.630129	0.122284	0.12	0.112	1
1110012L19Rik	0.0767038	0.0545122	0.0397175	0.219482	0.108632	0.0872171	0.132197	-1.25659	0.029	0.047	1
1110019D14Rik	0.110338	0.0924253	0.0876975	0.0712387	0.0787122	0.171764	0.157065	-0.462118	0.039	0.058	1
1110032A03Rik	0.106936	0.0891461	0.135647	0.114324	0.174158	0.110266	0.0264144	-0.293888	0.046	0.082	1
1110035H17Rik	0	0.0289103	0	0.0313087	0.0198928	0.0294247	0.379061	-0.777506	0.007	0.013	1
1110038B12Rik	0.365465	0.387104	0.53611	0.244518	0.416626	0.517813	0.513053	0.0330323	0.18	0.202	1
1110038F14Rik	0.30244	0.212543	0.215497	0.121499	0.185357	0.248001	0.984699	0.0920176	0.101	0.103	1
1110046J04Rik	0	0.0472946	0.0441797	0.0635996	0.0785654	0.0448612	0.161219	-0.474518	0.017	0.03	1
1110051M20Rik	0	0.109266	0.149507	0.1342	0.147549	0.291201	0.0651606	-0.929061	0.05	0.077	1
1110059E24Rik	0.0300417	0.248222	0.172044	0.177093	0.279856	0.175049	0.350399	-0.0741766	0.085	0.103	1
1110059G10Rik	0.157826	0.148141	0.262916	0.349846	0.150904	0.243989	0.017987	-0.23438	0.081	0.131	1
1110065P20Rik	0.138258	0.172655	0.124965	0.180825	0.163521	0.18128	0.0704136	-0.236037	0.061	0.092	1
1190005I06Rik	0	0.0179557	0.0171917	0	0.0419326	0.0453788	0.0578616	-1.11072	0.007	0.021	1
1190007I07Rik	0.231172	0.0744791	0.130442	0.221799	0.238217	0.105488	0.0976257	-0.702204	0.042	0.067	1
1200007C13Rik	0.109775	0.142384	0.145197	0.0944488	0.0236638	0.129456	0.0897664	0.708915	0.046	0.026	1
1300002E11Rik	0	0.0841081	0.12613	0.03618	0.109134	0.0539461	0.828419	0.460075	0.029	0.032	1
1500002C15Rik	0.639252	0.147824	0.0733421	0.0256264	0	0.156042	0.783835	0.944888	0.013	0.015	1
1500004A13Rik	0.0499959	0.0343811	0.0762667	0.0534781	0.0675431	0.106821	0.100302	-0.678588	0.028	0.047	1
1500011B03Rik	0.219149	0.281132	0.182533	0.151795	0.255493	0.290281	0.110049	-0.137878	0.088	0.122	1
1500015A07Rik	0.150098	0.0603577	0.0709586	0.0461704	0.0691805	0.123584	0.424839	-0.403321	0.031	0.041	1
1500015L24Rik	0.0300417	0.038033	0.0694475	0	0.0170152	0.0642878	0.166319	0.410284	0.022	0.011	1
1500026H17Rik	0.0393885	0.0481841	0.0346283	0.0138381	0.0198776	0.00801132	0.180743	1.54095	0.018	0.009	1
1600002D24Rik	0.0785933	0.0274268	0.0416307	0.126889	0.0373876	0.0334101	0.302645	-0.449747	0.015	0.024	1
1600002K03Rik	0.15904	0.20268	0.132458	0.15359	0.219552	0.205414	0.0768211	-0.269074	0.07	0.103	1
1600010M07Rik	0.182789	0.33829	0.343733	0.333391	0.280119	0.283634	0.890258	0.21962	0.136	0.139	1
1600012H06Rik	0.254827	0.159861	0.182115	0.406644	0.178241	0.22024	0.108083	-0.484942	0.074	0.103	1
1600014C10Rik	0.104315	0.0432294	0.0455208	0.0964555	0.0914865	0.0604922	0.0238776	-0.687386	0.018	0.043	1
1600020E01Rik	0.378938	0.258579	0.330299	0.335755	0.311918	0.275611	0.917284	-0.00504113	0.127	0.131	1
1600022D10Rik	0	0.0215924	0.0127941	0.0202167	0.0343068	0.0158345	0.181249	-0.460048	0.004	0.011	1
1700001L05Rik	0	0.00681149	0.00945071	0.0402915	0.0152674	0.0380474	0.0567297	-1.81971	0.004	0.015	1
1700003F12Rik	0.0535076	0.0502215	0.0344285	0.0471274	0.146893	0.0124256	0.0503725	-0.615013	0.017	0.036	1
1700006J14Rik	0	0	0.023927	0.0872452	0.0329833	0.0105128	0.128846	-1.46597	0.006	0.015	1
1700007L15Rik	0	0.020279	0.0228639	0	0.0464565	0.0309092	0.0967856	-0.625716	0.007	0.019	1
1700008J07Rik	0.0370045	0.0493965	0.0516224	0.0619145	0.00893447	0.0260391	0.859349	0.891348	0.018	0.017	1
1700010K24Rik	0	0.0377121	0.121212	0.0342933	0.0373978	0.0652149	0.71655	0.495963	0.02	0.017	1
1700012D14Rik	0	0.104527	0.102018	0.109122	0.0857479	0.111494	0.219418	-0.0781927	0.037	0.054	1
1700016G22Rik	0	0.0215049	0.0141536	0.0211667	0.0279069	0.0262565	0.354419	-0.583125	0.006	0.011	1
1700016P03Rik	0.0393885	0.0627789	0.0836072	0.188628	0.174228	0.132661	0.00136131	-1.19962	0.022	0.062	1
1700017B05Rik	0.324926	0.619868	0.638452	0.423692	0.570723	0.542165	0.611851	0.254672	0.245	0.247	1
1700019L13Rik	0	0.0477063	0.0170707	0.0591958	0.0605332	0.041047	0.0206524	-0.666333	0.011	0.032	1
1700021F05Rik	0.179839	0.0747154	0.130415	0.0783934	0.132894	0.138418	0.0665263	-0.283879	0.048	0.077	1
1700023H06Rik	0	0.0220193	0.029289	0	0.0574418	0.0618528	0.276817	-1.06574	0.011	0.019	1
1700025G04Rik	0.161763	0.241352	0.0891236	0.117174	0.150158	0.166122	0.343305	0.199928	0.055	0.071	1
1700028E10Rik	0.397097	0.0673433	0.0942516	0.0314003	0.0578982	0.110576	0.454367	0.364225	0.031	0.041	1
1700030J22Rik	0.0610131	0	0.0153861	0.0224353	0.00633343	0.0327225	0.102223	-0.974344	0.004	0.013	1
1700030K09Rik	0.0857246	0.055859	0.0525586	0.0543054	0.0238442	0.0686616	0.577557	0.137561	0.02	0.026	1
1700030N03Rik	0	0	0	0	0.0282504	0.0322354	0.015621	-3.94009	0	0.011	1
1700034P13Rik	0	0.0602973	0.524491	0.0202167	0.229636	0.0676618	0.429633	1.32996	0.017	0.011	1
1700037C18Rik	0	0.0984891	0.0626999	0.0233341	0.0707874	0.0452499	0.573687	0.600976	0.031	0.026	1
1700037H04Rik	0.26026	0.164345	0.104125	0.187476	0.124439	0.101847	0.767852	0.243822	0.061	0.067	1
1700045H11Rik	0	0.0379688	0.0246193	0.0531613	0.0522249	0.00507013	0.288863	0.00855024	0.011	0.019	1
1700052K11Rik	0.0370045	0.0303592	0.0121398	0.0173309	0.0247058	0.0193905	0.792903	0.112334	0.011	0.013	1
1700054A03Rik	0.746936	0.175089	0.130617	0.657571	0.126518	0.270879	0.00276606	-0.613499	0.061	0.116	1
1700064H15Rik	0.218941	0.138821	0.07024	0	0.090427	0.0357657	0.230961	1.2266	0.026	0.015	1
1700064M15Rik	0	0.0629412	0	0	0	0.0301723	0.682865	1.0292	0.011	0.009	1
1700066B17Rik	0.100959	0.0330189	0.0329182	0.0167612	0.0187745	0.0440396	0.590534	0.249214	0.013	0.017	1
1700066B19Rik	0	0.0094936	0.0185034	0	0.0673895	0.0578855	0.0756662	-1.92779	0.006	0.017	1
1700066M21Rik	0	0.0544696	0.0347351	0.0445077	0.0486729	0.054494	0.316749	-0.254981	0.017	0.026	1
1700084C06Rik	0	0.0141902	0.0598643	0.0703537	0.0036283	0.010285	0.800028	0.81869	0.011	0.013	1
1700086O06Rik	0.0387195	0.0141344	0.0065446	0.0205518	0.0419731	0.0327035	0.0758649	-1.35315	0.006	0.017	1
1700094D03Rik	0.0535076	0.06029	0.00795244	0.0268425	0.0264281	0.0310679	0.783013	0.369752	0.013	0.015	1
1700096K18Rik	0.194532	0.119368	0.0541084	0.0869636	0.106454	0.12366	0.124055	-0.215129	0.035	0.056	1
1700109H08Rik	0	0.0316475	0.0794799	0.0151067	0.0381316	0.0499999	0.72705	0.303248	0.02	0.024	1
1700110K17Rik	0.0572586	0.080777	0	0.0390646	0.020936	0.0474357	0.00968805	0.290284	0.004	0.021	1
1700113A16Rik	0.0572586	0.060888	0.0772827	0.245367	0.0417776	0.111653	0.200179	-0.731184	0.029	0.045	1
1700120C14Rik	0.0499959	0.0394265	0.022513	0.0288427	0.0161549	0.0201402	0.511833	0.651644	0.013	0.009	1
1700123M08Rik	0	0.0192852	0.046799	0	0.0237929	0.0393839	0.584127	0.0870426	0.013	0.017	1
1700123O20Rik	0.38573	0.28402	0.21606	0.169332	0.217405	0.267937	0.161554	0.175987	0.09	0.12	1
1700126G02Rik	0.0827328	0.0060507	0.0778573	0.0813637	0.0099005	0.0607459	0.433071	-0.154665	0.015	0.021	1
1810009A15Rik	0.164022	0.0382008	0.0173862	0.0157898	0.0376807	0.0316113	0.6148	0.253584	0.024	0.019	1
1810013L24Rik	0.838718	0.829947	0.771702	1.00298	0.80037	0.785671	0.38252	-0.0579249	0.352	0.399	1
1810019D21Rik	0	0.0711785	0.0064118	0	0.049661	0.00851761	0.303643	0.809735	0.013	0.006	1
1810019N24Rik	0.157937	0.00768458	0.0293287	0.0486897	0	0.00374582	0.432429	1.2917	0.011	0.006	1
1810024B03Rik	0.128327	0.0732456	0.0967188	0.0695657	0.0312074	0.097406	0.805765	0.30389	0.035	0.039	1
1810026B05Rik	0.601639	0.668722	0.472445	0.433109	0.548588	0.575832	0.56305	0.134911	0.243	0.277	1
1810030O07Rik	0.308007	0.366016	0.383541	0.416519	0.348716	0.378465	0.30199	-0.0211347	0.138	0.167	1
1810034E14Rik	0.0610131	0.0784356	0.107151	0.0384932	0.0630962	0.0627443	0.659793	0.603159	0.037	0.032	1
1810037I17Rik	1.3865	1.24381	1.28372	1.00554	1.18891	1.107	0.0399178	0.307831	0.591	0.579	1
1810044D09Rik	0.083107	0.0524191	0.0661354	0.0164791	0.0883276	0.0419066	0.445435	0.137012	0.02	0.028	1
1810055G02Rik	0.0572586	0.0372269	0.0104928	0.0374791	0.0490767	0.0172276	0.583417	-0.222436	0.013	0.017	1
1810058I24Rik	0.694988	0.700762	0.659569	0.729982	0.688325	0.68128	0.185429	-0.0251982	0.308	0.371	1
1810062O18Rik	0.0325342	0.0596666	0.0501093	0.0444559	0.0212244	0.0635422	0.72563	0.22134	0.022	0.026	1
2010001A14Rik	0.0952847	0.0728421	0.0735097	0	0.0232369	0.0652495	0.772776	0.865051	0.024	0.021	1
2010013B24Rik	0.175666	0.226968	0.205994	0.116584	0.176043	0.276516	0.314883	-0.0237964	0.077	0.097	1
2010315B03Rik	0.243516	0.0874644	0.140551	0.0666517	0.128139	0.101712	0.596916	0.196633	0.053	0.062	1
2010320M18Rik	0.0410891	0.0792158	0.0515807	0.109998	0.101607	0.0652213	0.103648	-0.397443	0.028	0.047	1
2200002D01Rik	0.3719	0.0597925	0.0560115	0	0.0258835	0.0598423	0.625968	1.04868	0.017	0.013	1
2210016F16Rik	0.172424	0.239317	0.18419	0.28238	0.379789	0.276394	0.00698554	-0.64381	0.09	0.148	1
2210016L21Rik	0.284315	0.203141	0.247757	0.301262	0.209726	0.182966	0.440443	0.111256	0.085	0.101	1
2210408F21Rik	0.1858	0.128177	0.182474	0.300714	0.214638	0.267599	0.00111321	-0.78398	0.063	0.122	1
2210408I21Rik	0.0410891	0.296231	0.407916	0.296928	0.353965	0.351746	0.10591	-0.0624956	0.103	0.139	1
2300009A05Rik	0.101221	0.187023	0.215252	0.217824	0.186714	0.239183	0.194134	-0.184179	0.081	0.107	1
2310001H17Rik	0.721245	0.620821	0.572971	0.535704	0.488082	0.379432	0.079167	0.576951	0.236	0.204	1
2310009A05Rik	0.276328	0.316273	0.259595	0.2882	0.364918	0.285336	0.153247	-0.13498	0.129	0.165	1
2310009B15Rik	0.155092	0.151729	0.261783	0.104178	0.119853	0.146302	0.858408	0.659271	0.076	0.082	1
2310010J17Rik	0.245114	0.257766	0.143056	0.140915	0.236772	0.166026	0.264102	0.174707	0.076	0.099	1
2310011J03Rik	0.336186	0.293821	0.215879	0.242207	0.329081	0.37722	0.0265234	-0.420422	0.107	0.157	1
2310015A10Rik	0.114134	0.140151	0.0885059	0.178206	0.141133	0.118119	0.0122268	-0.232025	0.041	0.079	1
2310022A10Rik	0.218562	0.123782	0.215106	0.216835	0.129385	0.130583	0.585063	0.245696	0.059	0.069	1
2310022B05Rik	0.0535076	0.101719	0.121648	0.109601	0.128794	0.162068	0.0256165	-0.429734	0.035	0.067	1
2310033P09Rik	0.172242	0.114673	0.14812	0.272676	0.200558	0.217577	0.00671751	-0.79301	0.061	0.109	1
2310039H08Rik	0.113351	0.14482	0.139492	0.104	0.144246	0.150618	0.613673	-0.00836216	0.066	0.075	1
2310040G24Rik	0.0393885	0.104833	0.0674195	0.0554615	0.0746855	0.0509596	0.569107	0.50125	0.028	0.034	1
2310057M21Rik	0.144599	0.0665066	0.0323178	0.0505673	0.0983939	0.0918737	0.530901	-0.626949	0.028	0.034	1
2310058D17Rik	0.134967	0.0223306	0.0168299	0.175725	0.070509	0.0600254	0.00431814	-1.57837	0.011	0.039	1
2310061I04Rik	0.0572586	0.147511	0.197738	0.107343	0.0735623	0.154226	0.511392	0.482374	0.061	0.052	1
2410002F23Rik	0.326911	0.178849	0.142965	0.0543168	0.110003	0.12358	0.36792	0.720689	0.068	0.056	1
2410004B18Rik	0.0558873	0.137779	0.0821887	0.0997969	0.109856	0.129054	0.175484	-0.113401	0.044	0.064	1
2410006H16Rik	1.18372	1.49151	1.70967	1.04559	1.41044	1.47296	0.000474623	0.33866	0.67	0.603	1
2410022M11Rik	0	0.107767	0.0675246	0	0.145905	0.0943337	0.534426	-0.235021	0.035	0.043	1
2410080I02Rik	0	0.100564	0.0277229	0.0170123	0.0225603	0.0501233	0.632225	0.834577	0.026	0.021	1
2410131K14Rik	0.0905674	0.0791154	0.0980626	0.0584602	0.0766955	0.0791856	0.551203	0.22744	0.035	0.043	1
2500002B13Rik	0	0.0371361	0.0473502	0.0278672	0.0646377	0.0118104	0.755492	0.223795	0.017	0.019	1
2510002D24Rik	0.106314	0.0761942	0.0802904	0.264138	0.0487132	0.136528	0.0645699	-0.715342	0.035	0.06	1
2510009E07Rik	0.199201	0.200962	0.307279	0.369613	0.250635	0.384977	0.00357312	-0.513845	0.092	0.157	1
2510039O18Rik	0.354031	0.399623	0.467966	0.495201	0.334116	0.411449	0.118515	0.115332	0.182	0.24	1
2510046G10Rik	0	0.0309408	0.0160785	0.0446128	0.0336579	0.0383001	0.403263	-0.707909	0.011	0.017	1
2610001J05Rik	0.829761	0.642091	0.700423	0.602449	0.745103	0.651445	0.150786	0.0054058	0.295	0.367	1
[truncated: 11,560 more rows]

## Sheet: DEG_Inflmac_NDvD_LCMV
Genes	D-1	D-2	D-3	ND-1	ND-2	ND-3	p_val	avg_log2FC	pct.1	pct.2	p_val_adj
[truncated: 12,659 more rows]

## Sheet: DEG_Inflmac_NDvD_STZ
Genes	D1	D2	D3	ND1	ND2	ND3	p_val	avg_log2FC	pct.1	pct.2	p_val_adj
[truncated: 5,553 more rows]

[truncated: 13 more sheets: DEG_Inflmac_cASOvsAPOC3v_LCMV, DEG_Trem2hi_NDvD_LCMV, DEG_Trem2hi_NDvD_STZ, DEG_Trem2hi_ASOvs APOC3_LCMV, DEG_EC_NDvD (LCMV), DEG_EC_NDvsD (STZ), DEG_EC_cASOvAPOC3 (LCMV), DEG_SMC_NDvD_LCMV, DEG_SMC_NDvD_STZ, DEG_SMC_ASOvsAPOC3_LCMV, DEG_Fibro_NDvsD_LCMV, DEG_Fibro_NDvsD_STZ, DEG_Fibro_ASOvsAPOC3_LCMV]
