# Supplementary material for: Elevated apolipoprotein C3 heightens atherosclerosis risk by mediating arterial accumulation of free cholesterol and local inflammation in diabetes
Source: Research Square preprint supplement (doi:10.21203/rs.3.rs-6979508/v1), 2025-07-16
Supplement: Supplementary file 2 [file 3f7f618270b3b978aaa212b2.docx]

**Resource information**

***Key Reagents***

| **Reagent** | **Final concentration** | **Catalogue number/identifier** | **Vendor** |
| --- | --- | --- | --- |
| Liberase TM | 4 U/mL | 05401119001 | Roche |
| Hyaluronidase | 60 U/mL | H3884 | Sigma Aldrich |
| DNase 1 | 60 U/mL | LS006331 | Worthington |
| Actinomycin | 1 mg/mL | 11805017 | ThermoFisher |
| DRAQ5 | 1:1000 | 65-0880-92 | Invitrogen |
| Mouse ANGPTL3 ELISA (plasma) | 1:10 | EMANGPTL3 | Invitrogen |
| Mouse APOC3 ELISA (plasma)  Made in house usingantibody-pair | 1:150,000 | ab241863 | Abcam |
| APOC3 sandwich ELISA (human plasma) |  | 33A-G2b | Academy Biochemical |
| Biotinylation Kit / Biotin Conjugation Kit (for APOC3 ELISA) |  | ab201795 | Abcam |
| IL-18 ELISA (plasma) | 1:4 | 88-50618 | Invitrogen |
| Amplex Red Cholesterol assay | 1:5 (aortas) | A12216 | Invitrogen |
| Triglyceride Assay Kit | 1:200 (aortas) | Ab65336 | Abcam |
| CD45-PE-Dazzle | 1:500 (0.1 μg/100 μL) | 30-F11 | eBioscience (now Invitrogen) |
| CD115-APC | 1:100 (0.2 μg/100 μL) | AFS98 | eBioscience (now Invitrogen) |
| GR1-APC or PE-Cy7 | 1:1000 (0.05μg/100 μL) | RB6-8C5 | eBioscience (now Invitrogen) |
| LYVE1-PE | 1:100 (0.2 μg/100 μL) | AFS98 | Invitrogen |
| Ly6C-APC | 1:250 (0.2 μg/100 μL) | HK1.4 | Biolegend |
| CD11B-PE-Cy7 | 1:250 (0.2 μg/100 μL) | M1/70 | Invitrogen |
| CD11C-BV711 | 1:250 (0.2 μg/100 μL) | N418 | Biolegend |
| F480-BV605 | 1:250 (0.2 μg/100 μL) | BM8 | Biolegend |
| Viability dye e450 | 1:100 | 65-0863-14 | Invitrogen |
| Bodipy 493/503 | 2 μg/mL | D3922 | ThermoFisher |
| Rat IgG | To match primary | Cedarlane | CLCR2A00 |
| LYVE1 (IHC) goat IgG | 5 μg/mL | RnD | AF2125 |
| Rabbit IgG | To match primary | Invitrogen | 02-6102 |
| Anti-rat IgG | 5 μg/mL | Invitrogen | **A-21247** |
| Anti-rabbit IgG | 5 μg/mL | Invitrogen | **A-21428** |
| Anti-goat IgG | 5 μg/mL | Invitrogen | **A-11055** |
| APOC3 ASO (GalNAc) | 10 mg/kg/week | Ionis Pharmaceuticals | CCAGCTTTATTAGGGACAGC |
| ANGTPL3 ASO (GalNAc) | 10 mg/kg/week | Ionis Pharmaceuticals | TTTCTTTTATCTGCATGTGC |
| Control ASO (GalNAc) | 10 mg/kg/week | Ionis Pharmaceuticals | CCTTCCCTGAAGGTTCCTCC |

***Peptides monitored by PRM Analysis***

| Proteins | Peptides | Precursor  (m/z) | Charge  State | RT  (min) |
| --- | --- | --- | --- | --- |
| 15N-APOA1 | 15N-DYVSQFEGSALGK | 708.3160 | 2 | 23.9 |
| APOB N-t | LSLEDTPK | 451.7451 | 2 | 17.8 |
| APOB N-t | LQEIFNTAK | 532.2928 | 2 | 19.7 |
| APOB N-t | SLPDYLER | 496.7560 | 2 | 21.1 |
| APOB C-t | DLDVVNIPLAR | 612.8510 | 2 | 25.2 |
| APOB C-t | FFLPDFK | 457.2445 | 2 | 26.7 |
| APOB C-t | FIIPGIK | 394.2575 | 2 | 24.7 |
| APOB C-t | SLPVGNTVFDLNK | 702.3801 | 2 | 24.2 |
| APOC1 | AAIEHIK | 391.2320 | 2 | 12.7 |
| APOC1 | AWFSEAFGK | 521.7533 | 2 | 25.1 |
| APOC2 | TYPISMDEK | 542.2550 | 2 | 18.6 |
| APOC3 | TVQDALSSVQESDIAVVAR | 663.3480 | 3 | 24.4 |
| APOC3 | GYWSK | 640.3089 | 1 | 15.8 |
| APOC3 | FTGFWDSNPEDQPTPAIES | 1069.4711 | 2 | 26.7 |
| APOC4 | TQAWLQSSR | 538.7778 | 2 | 18.2 |
| APOC4 | THSLCPR | 435.7162 | 2 | 12.2 |
| APOE | ELEEQLGPVAEETR | 800.3967 | 2 | 20.4 |
| APOE | LGPLVEQGR | 484.7798 | 2 | 17.9 |
| APOE | TANLGAGAAQPLR | 620.3438 | 2 | 17.5 |
| APOE | LQAEIFQAR | 538.2984 | 2 | 20.7 |

N-t, N-terminal, C-t, C-terminal. RT, retention time.

***Primer Sequences***

| Gene | Forward primer | Reverse primer |
| --- | --- | --- |
| Rn18s | CATTAAATCAGTTATGGTTCCTTTGG | CCCGTCGGCATGTATTAGCT |
| Apoc3 | TACAGGGCTACATGGAACAAGC | CAGGGATCTGAAGTGATTGTCC |
| Angptl3 | ACATGTGGCTGAGATTGCTG | GCTGGAGCATCATTTTGGAT |
