# Supplementary material for: Elevated apolipoprotein C3 heightens atherosclerosis risk by mediating arterial accumulation of free cholesterol and local inflammation in diabetes
Source: Research Square preprint supplement (doi:10.21203/rs.3.rs-6979508/v1), 2025-07-16
Supplement: Supplementary file 3 [file 69cba673df8ddb52aa354f0a.xlsx]

## Sheet: READ ME
	1	2 different models of type 1 diabtes: STZ (beta cell toxin) and LCMV (transgenic model), all experiments run in triplicates
	2	In the LCMV model, some diabetic mice were treated with an APOC3 antisense oligonucleotide (ASO) to reduce triglyceride-rich lipoproteins
	3	DEG=differentially expressed gene
	4	resimac=resident macrophages
	5	Inflmac=inlammatory macrophages
	6	Trem2hi=trem2high macropahges
	7	EC=endothelial cells
	8	SMC=Smooth muscle cells

## Sheet: LCMV_12wk
p_val	avg_log2FC	pct.1	pct.2	p_val_adj	cluster	gene
0	3.18665	0.954	0.162	0	SMC	Cnn1
0	2.87621	0.939	0.176	0	SMC	Npnt
0	3.41281	0.988	0.231	0	SMC	Myh11
0	3.64948	0.949	0.192	0	SMC	Ppp1r14a
0	3.23231	0.917	0.179	0	SMC	Kcnab1
0	3.33984	0.862	0.124	0	SMC	Sh3bgr
0	3.05424	0.898	0.161	0	SMC	Myom1
0	2.8002	0.915	0.182	0	SMC	Thsd4
0	2.53217	0.938	0.206	0	SMC	Sost
0	3.3715	0.855	0.126	0	SMC	Mcam
0	2.34573	0.911	0.187	0	SMC	Postn
0	2.7599	0.943	0.22	0	SMC	Col18a1
0	2.83916	0.964	0.243	0	SMC	Mylk
0	2.80533	0.911	0.192	0	SMC	Ramp1
0	3.13696	0.939	0.237	0	SMC	Enah
0	3.02212	0.854	0.152	0	SMC	Myocd
0	2.9807	0.953	0.252	0	SMC	Synpo2
0	2.51893	0.982	0.289	0	SMC	Itga8
0	2.59339	0.923	0.233	0	SMC	Lmod1
0	2.49374	0.948	0.261	0	SMC	Ccn3
0	3.61363	0.771	0.088	0	SMC	Npy1r
0	2.51425	0.935	0.253	0	SMC	Rcan2
0	3.08957	0.799	0.119	0	SMC	Gm13889
0	3.33179	0.785	0.109	0	SMC	Susd5
0	3.01262	0.81	0.137	0	SMC	Bcam
0	4.15271	0.736	0.063	0	SMC	Mylk4
0	2.81799	0.858	0.189	0	SMC	Ctnna3
0	2.67519	0.87	0.201	0	SMC	Adcy5
0	2.1612	0.892	0.229	0	SMC	Pdlim3
0	2.41095	0.925	0.263	0	SMC	Smtn
0	2.64764	0.864	0.204	0	SMC	Dmpk
0	3.35692	0.75	0.094	0	SMC	Fbxl22
0	2.47018	0.896	0.247	0	SMC	Nexn
0	1.89831	0.896	0.248	0	SMC	Ncam1
0	2.40214	0.795	0.158	0	SMC	Mrvi1
0	2.85403	0.773	0.137	0	SMC	Tspan2
0	3.30161	0.73	0.098	0	SMC	E030013I19Rik
0	2.73866	0.781	0.151	0	SMC	Gucy1b1
0	2.62195	0.794	0.164	0	SMC	Gucy1a1
0	2.51228	0.813	0.183	0	SMC	Cacnb2
0	2.34177	0.801	0.173	0	SMC	Hacd1
0	3.42792	0.718	0.09	0	SMC	Ptprz1
0	2.98101	0.758	0.132	0	SMC	Dtna
0	1.86553	0.876	0.251	0	SMC	Cav1
0	2.00834	0.772	0.152	0	SMC	Erbb4
0	3.05078	0.982	0.362	0	SMC	Myl9
0	2.86388	0.729	0.109	0	SMC	Sgcg
0	3.24215	0.711	0.093	0	SMC	1190005I06Rik
0	2.37554	0.873	0.26	0	SMC	Mustn1
0	2.47451	0.768	0.156	0	SMC	Spint2
0	2.23464	0.715	0.11	0	SMC	Tinagl1
0	2.76884	0.718	0.117	0	SMC	Efhd1
0	2.61714	0.73	0.129	0	SMC	Rasl12
0	2.22479	0.937	0.337	0	SMC	Map1b
0	2.6703	0.757	0.158	0	SMC	Sparcl1
0	2.35663	0.931	0.333	0	SMC	Plcb4
0	2.36671	0.765	0.168	0	SMC	Hspb7
0	2.91078	0.708	0.114	0	SMC	Jph2
0	2.24563	0.764	0.171	0	SMC	Lims2
0	2.06558	0.943	0.356	0	SMC	Slmap
0	3.22153	0.982	0.397	0	SMC	Tpm2
0	3.01175	0.676	0.092	0	SMC	Kcnmb1
0	2.11811	0.891	0.309	0	SMC	Pbxip1
0	2.02409	0.785	0.204	0	SMC	Hspb2
0	2.37019	0.805	0.225	0	SMC	Pde4dip
0	1.93246	0.766	0.186	0	SMC	Kcnma1
0	2.37042	0.735	0.16	0	SMC	Mtus2
0	1.87792	0.848	0.274	0	SMC	Kank1
0	3.56265	0.644	0.073	0	SMC	Ldb3
0	1.98053	0.862	0.293	0	SMC	Ppp1r12b
0	2.14419	0.84	0.271	0	SMC	Lmcd1
0	1.89404	0.842	0.273	0	SMC	Tgfb1i1
0	1.95498	0.876	0.309	0	SMC	Msrb1
0	2.09374	0.957	0.391	0	SMC	Fblim1
0	3.03112	0.663	0.098	0	SMC	Ryr2
0	2.40722	0.71	0.146	0	SMC	Cspg4
0	1.9837	0.918	0.355	0	SMC	Msrb3
0	2.44685	0.976	0.416	0	SMC	Actn1
0	1.99873	0.767	0.208	0	SMC	Kalrn
0	2.19482	0.694	0.137	0	SMC	Lgr6
0	3.10662	0.643	0.087	0	SMC	Rbpms2
0	3.17534	0.636	0.083	0	SMC	Scube3
0	2.41029	0.97	0.418	0	SMC	Csrp1
0	2.89404	0.655	0.104	0	SMC	Hspb6
0	1.88082	0.847	0.296	0	SMC	Ccdc107
0	1.92099	0.765	0.215	0	SMC	St5
0	2.59739	0.684	0.136	0	SMC	Unc5c
0	2.43807	0.693	0.146	0	SMC	Smarcd3
0	2.54993	0.634	0.089	0	SMC	Pcp4l1
0	1.8368	0.807	0.262	0	SMC	Pdlim1
0	2.16915	0.664	0.124	0	SMC	Pgm5
0	1.95126	0.898	0.359	0	SMC	Lrrfip1
0	2.07198	0.787	0.252	0	SMC	Wtip
0	1.82457	0.884	0.35	0	SMC	Pdlim7
0	1.83685	0.83	0.299	0	SMC	Map3k20
0	1.86349	0.714	0.183	0	SMC	Sorl1
0	1.89616	0.772	0.242	0	SMC	Tmem47
0	3.30629	0.995	0.469	0	SMC	Tagln
0	1.94679	0.747	0.223	0	SMC	Stk38l
0	2.34433	0.675	0.151	0	SMC	Filip1
0	3.34423	0.59	0.069	0	SMC	Dgkb
0	2.27128	0.643	0.123	0	SMC	Aoc3
0	2.35797	0.93	0.411	0	SMC	Filip1l
0	1.77728	0.866	0.349	0	SMC	Cfl2
0	1.95019	0.891	0.376	0	SMC	Olfr1033
0	2.66181	0.983	0.469	0	SMC	Tpm1
0	1.7781	0.757	0.243	0	SMC	Phldb2
0	1.80372	0.761	0.248	0	SMC	Marveld1
0	3.03257	0.594	0.082	0	SMC	Rgs4
0	1.6866	0.92	0.409	0	SMC	Vcl
0	1.66637	0.773	0.262	0	SMC	Pkp4
0	1.63429	0.912	0.403	0	SMC	Fermt2
0	1.93432	0.676	0.168	0	SMC	Rrad
0	1.58643	0.768	0.26	0	SMC	Hdac9
0	2.73236	0.602	0.095	0	SMC	Actg2
0	2.25704	0.659	0.155	0	SMC	Fam13c
0	2.25748	0.958	0.454	0	SMC	Ppp1r12a
0	2.50856	0.986	0.485	0	SMC	Dmd
0	1.73434	0.752	0.254	0	SMC	Wwp2
0	2.10833	0.653	0.157	0	SMC	Prdm16
0	2.14994	0.639	0.145	0	SMC	Uchl1
0	2.05285	0.657	0.164	0	SMC	Gnai1
0	2.04364	0.981	0.488	0	SMC	Pcdh7
0	1.96645	0.646	0.154	0	SMC	Sorbs2
0	2.60535	0.581	0.089	0	SMC	Tcap
0	2.09555	0.637	0.147	0	SMC	Schip1
0	1.55828	0.821	0.333	0	SMC	Myh10
0	1.72272	0.687	0.2	0	SMC	Pawr
0	1.55976	0.885	0.4	0	SMC	Oxct1
0	1.74543	0.695	0.211	0	SMC	Tmem38b
0	1.74144	0.708	0.224	0	SMC	2310022B05Rik
0	1.55649	0.711	0.227	0	SMC	Khdrbs3
0	1.54853	0.71	0.231	0	SMC	Dact3
0	1.72508	0.68	0.207	0	SMC	Tacc2
0	1.66316	0.881	0.408	0	SMC	Fam129a
0	2.53741	0.574	0.101	0	SMC	Rgs7bp
0	1.97681	0.636	0.163	0	SMC	Fbxo32
0	1.53596	0.73	0.26	0	SMC	Atp2b4
0	1.7533	0.667	0.198	0	SMC	Asap2
0	2.9074	0.555	0.087	0	SMC	Net1
0	1.95664	0.98	0.513	0	SMC	Rbpms
0	3.74977	0.514	0.048	0	SMC	Cdh6
0	1.98647	0.966	0.5	0	SMC	Tns1
0	1.97658	0.635	0.17	0	SMC	Peli2
0	1.85349	0.603	0.143	0	SMC	Ccdc3
0	2.29882	0.571	0.111	0	SMC	Cap2
0	1.85065	0.603	0.147	0	SMC	Slc24a3
0	2.39179	0.57	0.115	0	SMC	Dsp
0	2.7593	0.538	0.084	0	SMC	Anln
0	1.94924	0.973	0.521	0	SMC	Pls3
0	1.64408	0.652	0.202	0	SMC	Adgrl2
0	2.74588	0.989	0.541	0	SMC	Flna
0	2.35556	0.558	0.111	0	SMC	Ttll7
0	1.68301	0.929	0.484	0	SMC	Actn4
0	1.84826	0.618	0.173	0	SMC	Inpp5a
0	2.11089	0.576	0.133	0	SMC	Napepld
0	1.60388	0.937	0.498	0	SMC	Rras
0	4.14341	0.48	0.041	0	SMC	Tafa1
0	2.88706	0.506	0.069	0	SMC	Akap6
0	3.69474	0.476	0.04	0	SMC	Optc
0	1.8449	0.968	0.532	0	SMC	Ptgis
0	1.85404	0.594	0.158	0	SMC	Arhgef17
0	1.59338	0.696	0.26	0	SMC	Tnfrsf12a
0	2.26861	0.531	0.099	0	SMC	Perp
0	1.85506	0.568	0.136	0	SMC	Vldlr
0	2.38578	0.527	0.098	0	SMC	Speg
0	2.62424	0.511	0.082	0	SMC	2200002D01Rik
0	1.94884	0.562	0.134	0	SMC	Plin4
0	1.85248	0.593	0.166	0	SMC	Phtf2
0	1.52006	0.619	0.193	0	SMC	Fstl3
0	2.18458	0.985	0.559	0	SMC	Cald1
0	3.41934	0.996	0.571	0	SMC	Acta2
0	1.79274	0.647	0.226	0	SMC	Itga5
0	3.18762	0.479	0.058	0	SMC	Map3k7cl
0	2.36369	0.532	0.112	0	SMC	Cdkl5
0	2.10185	0.971	0.551	0	SMC	Hspb1
0	1.52521	0.981	0.564	0	SMC	Cpe
0	2.53559	0.975	0.558	0	SMC	Rock1
0	1.59573	0.568	0.157	0	SMC	Plekho1
0	3.03303	0.988	0.58	0	SMC	Csrp2
0	1.77715	0.585	0.178	0	SMC	Stimate
0	1.5691	0.93	0.528	0	SMC	Pdlim5
0	1.93104	0.531	0.13	0	SMC	Mark1
0	1.57558	0.627	0.23	0	SMC	Serpine1
0	2.47198	0.462	0.065	0	SMC	Itih4
0	2.16616	0.979	0.582	0	SMC	Lpp
0	1.88749	0.536	0.141	0	SMC	Map1a
0	1.56532	0.561	0.17	0	SMC	Atp8b1
0	1.69506	0.558	0.168	0	SMC	2900026A02Rik
0	1.60229	0.569	0.179	0	SMC	Endod1
0	2.5256	0.48	0.094	0	SMC	Flnc
0	1.92421	0.51	0.126	0	SMC	Stbd1
0	1.7849	0.524	0.142	0	SMC	Camk2g
0	1.55582	0.568	0.186	0	SMC	Plekhg3
0	1.61813	0.522	0.149	0	SMC	Acsl1
0	3.53885	0.409	0.042	0	SMC	Htr1b
0	1.90775	0.48	0.115	0	SMC	Tes
0	2.82357	0.414	0.061	0	SMC	Sphkap
0	1.50185	0.509	0.157	0	SMC	Hbegf
0	2.74495	0.41	0.059	0	SMC	Nrtn
0	1.72918	0.474	0.125	0	SMC	Serpini1
0	2.96089	0.391	0.043	0	SMC	Bmp3
0	1.63788	0.475	0.127	0	SMC	Grb14
0	1.85534	0.451	0.108	0	SMC	Pkdcc
0	1.95932	0.431	0.092	0	SMC	Gm17501
0	1.64848	0.469	0.133	0	SMC	Cd59a
0	2.99677	0.375	0.048	0	SMC	Itga7
0	1.76529	0.432	0.106	0	SMC	Sntb1
0	2.78716	0.377	0.054	0	SMC	Fgf1
0	1.6375	0.409	0.086	0	SMC	Kcnq5
0	2.21698	0.401	0.079	0	SMC	Itga3
0	2.32687	0.394	0.075	0	SMC	Sacs
0	1.92993	0.41	0.094	0	SMC	Nkain2
0	1.60486	0.417	0.105	0	SMC	Cobll1
0	2.51942	0.365	0.053	0	SMC	Asb2
0	2.70469	0.365	0.054	0	SMC	Chmp4c
0	1.53458	0.441	0.13	0	SMC	Osbpl3
0	1.64475	0.408	0.105	0	SMC	Ccdc141
0	1.75201	0.392	0.091	0	SMC	Gk
0	1.91801	0.379	0.081	0	SMC	Ncald
0	2.91265	0.341	0.045	0	SMC	Slc22a1
0	1.54756	0.399	0.105	0	SMC	Pip5k1b
0	1.70438	0.392	0.101	0	SMC	Ano1
0	2.19367	0.356	0.067	0	SMC	Dnajb5
0	2.8849	0.329	0.041	0	SMC	Gm48529
0	1.81399	0.372	0.086	0	SMC	Nkd1
0	1.90065	0.366	0.081	0	SMC	Bcar3
0	2.35842	0.355	0.07	0	SMC	Carmn
0	3.83541	0.308	0.025	0	SMC	Xirp1
0	1.58313	0.398	0.117	0	SMC	Trabd2b
0	2.87365	0.317	0.041	0	SMC	Xk
0	1.66089	0.362	0.09	0	SMC	Nes
0	1.92295	0.352	0.08	0	SMC	Inafm2
0	1.6936	0.368	0.097	0	SMC	Tead3
0	1.52168	0.354	0.086	0	SMC	Hey2
0	1.5021	0.371	0.107	0	SMC	B3galnt2
0	1.58319	0.363	0.1	0	SMC	Eml2
0	1.75704	0.346	0.083	0	SMC	Slc25a23
0	1.83146	0.34	0.082	0	SMC	Gm26632
0	2.6877	0.295	0.038	0	SMC	Wnt16
0	1.97143	0.326	0.069	0	SMC	Dysf
0	3.09379	0.327	0.071	0	SMC	Tnnt2
0	1.53534	0.341	0.088	0	SMC	Mmd
0	2.96267	0.289	0.037	0	SMC	Sync
0	2.54101	0.991	0.74	0	SMC	Dstn
0	1.84883	0.321	0.071	0	SMC	Lama5
0	1.60067	0.332	0.083	0	SMC	Bik
0	3.41185	0.268	0.023	0	SMC	Grip2
0	1.69429	0.328	0.085	0	SMC	Gne
0	1.68532	0.319	0.076	0	SMC	Fbxo2
0	2.56895	0.286	0.043	0	SMC	Tpd52l1
0	1.51316	0.34	0.1	0	SMC	Sncg
0	2.34414	0.291	0.057	0	SMC	Ccdc42
0	2.13959	0.283	0.049	0	SMC	Gm11627
0	1.63342	0.304	0.074	0	SMC	Nos1ap
0	2.45309	0.272	0.043	0	SMC	Pnck
0	1.62407	0.315	0.086	0	SMC	Kctd16
0	1.69483	0.303	0.074	0	SMC	Prkaa2
0	1.98968	0.292	0.063	0	SMC	Itgb3
0	2.74534	0.277	0.05	0	SMC	Art3
0	3.07109	0.256	0.03	0	SMC	Rbm24
0	1.65238	0.298	0.074	0	SMC	Atp1b2
0	2.30416	0.273	0.05	0	SMC	Cav3
0	2.53193	0.263	0.04	0	SMC	Mmp17
0	1.85685	0.288	0.065	0	SMC	Slc4a3
0	1.85942	0.279	0.062	0	SMC	Sort1
0	1.50407	0.286	0.069	0	SMC	Rgs7
0	2.45966	0.258	0.043	0	SMC	Gipc2
0	1.81997	0.27	0.056	0	SMC	Tbxa2r
0	2.16186	0.262	0.05	0	SMC	Fjx1
0	1.72466	0.278	0.07	0	SMC	Synm
0	1.84701	0.269	0.061	0	SMC	Ankrd9
0	1.57236	0.287	0.079	0	SMC	Tbx18
0	2.09146	0.254	0.047	0	SMC	Kcnd3
0	2.35735	0.251	0.045	0	SMC	Lancl3
0	1.59559	0.272	0.069	0	SMC	Ptges3l
0	1.71278	0.263	0.063	0	SMC	Syde2
0	1.71895	0.26	0.065	0	SMC	Dlgap1
0	1.60285	0.252	0.063	0	SMC	Bag2
0	1.57682	0.251	0.069	0	SMC	Gm4876
0	1.54196	0.992	0.911	0	SMC	Vim
0	1.89024	0.995	0.944	0	SMC	Myl6
0	5.2474	0.997	0.167	0	Fibroblast	Dcn
0	5.08298	0.888	0.085	0	Fibroblast	Serpinf1
0	3.58426	0.868	0.097	0	Fibroblast	Lum
0	5.65595	0.804	0.038	0	Fibroblast	Dpt
0	6.24274	0.762	0.028	0	Fibroblast	Abca8a
0	4.97298	0.792	0.082	0	Fibroblast	Fbln1
0	6.07669	0.731	0.027	0	Fibroblast	Cygb
0	5.28451	0.674	0.05	0	Fibroblast	Bicc1
0	4.2291	0.709	0.142	0	Fibroblast	Pcolce
0	4.29805	0.651	0.094	0	Fibroblast	Pdgfra
0	6.64311	0.549	0.016	0	Fibroblast	Dpep1
0	6.31705	0.534	0.012	0	Fibroblast	Scn7a
0	4.78183	0.561	0.042	0	Fibroblast	Aldh1a1
0	3.59605	0.889	0.38	0	Fibroblast	Igfbp4
0	6.25948	0.521	0.02	0	Fibroblast	Clec3b
0	3.53809	0.602	0.107	0	Fibroblast	Cd34
0	5.68511	0.528	0.035	0	Fibroblast	C3
0	4.6948	0.536	0.045	0	Fibroblast	Gpx3
0	5.16825	0.523	0.04	0	Fibroblast	Pi16
0	3.52171	0.579	0.103	0	Fibroblast	Mmp2
0	4.51269	0.554	0.085	0	Fibroblast	Ccl19
0	3.3556	0.609	0.147	0	Fibroblast	Slc43a3
0	4.85991	0.518	0.071	0	Fibroblast	Smoc2
0	2.86746	0.619	0.176	0	Fibroblast	Cp
0	3.93584	0.932	0.49	0	Fibroblast	Serping1
0	4.30473	0.477	0.037	0	Fibroblast	Fxyd6
0	6.47731	0.449	0.011	0	Fibroblast	Svep1
0	2.70053	0.757	0.326	0	Fibroblast	Lama2
0	2.91382	0.531	0.103	0	Fibroblast	Tshz2
0	3.50094	0.484	0.062	0	Fibroblast	Ly6a
0	1.69072	0.909	0.488	0	Fibroblast	Apoe
0	2.79029	0.619	0.203	0	Fibroblast	Kcnt2
0	4.96562	0.459	0.044	0	Fibroblast	Entpd2
0	3.86503	0.5	0.085	0	Fibroblast	Fbln2
0	2.77157	0.499	0.102	0	Fibroblast	Igf1
0	3.04853	0.672	0.275	0	Fibroblast	Col14a1
0	2.57124	0.765	0.375	0	Fibroblast	Rnase4
0	3.96712	0.481	0.093	0	Fibroblast	Nid1
0	2.4819	0.55	0.17	0	Fibroblast	Emp1
0	4.60981	0.408	0.029	0	Fibroblast	Olfml3
0	5.05031	0.4	0.027	0	Fibroblast	Il6
0	2.80263	0.592	0.221	0	Fibroblast	Pcolce2
0	5.43567	0.397	0.028	0	Fibroblast	Gfpt2
0	2.54552	0.624	0.257	0	Fibroblast	Mgst1
0	5.87675	0.379	0.012	0	Fibroblast	Abca8b
0	3.06318	0.621	0.263	0	Fibroblast	Gas1
0	6.47389	0.357	0.007	0	Fibroblast	Ms4a4d
0	3.17	0.427	0.078	0	Fibroblast	Cxcl1
0	1.95609	0.509	0.169	0	Fibroblast	Timp1
0	4.40701	0.41	0.071	0	Fibroblast	Igfbp5
0	3.50477	0.423	0.084	0	Fibroblast	Fmo1
0	3.46544	0.448	0.111	0	Fibroblast	C1s1
0	2.87174	0.48	0.143	0	Fibroblast	Cntfr
0	4.75436	0.36	0.026	0	Fibroblast	Cpxm1
0	3.3113	0.426	0.093	0	Fibroblast	Ackr3
0	1.80249	0.378	0.049	0	Fibroblast	Ramp2
0	3.18421	0.392	0.063	0	Fibroblast	Xdh
0	2.07824	0.608	0.28	0	Fibroblast	Meg3
0	5.90934	0.345	0.018	0	Fibroblast	Igfbp6
0	4.72681	0.351	0.025	0	Fibroblast	Scara5
0	5.12297	0.35	0.032	0	Fibroblast	Cpxm2
0	2.42794	0.419	0.102	0	Fibroblast	Icam1
0	4.77597	0.336	0.022	0	Fibroblast	Fmod
0	3.07026	0.432	0.122	0	Fibroblast	C1ra
0	3.88685	0.381	0.073	0	Fibroblast	Tnfaip6
0	2.65058	0.888	0.581	0	Fibroblast	Cebpd
0	4.53012	0.349	0.043	0	Fibroblast	Gdf10
0	2.68852	0.466	0.162	0	Fibroblast	Ar
0	3.13862	0.464	0.161	0	Fibroblast	Galnt15
0	2.7627	0.463	0.163	0	Fibroblast	Cyp1b1
0	2.61271	0.817	0.518	0	Fibroblast	Cd302
0	2.97775	0.465	0.168	0	Fibroblast	Cxcl12
0	2.43665	0.96	0.665	0	Fibroblast	Cfh
0	2.23039	0.717	0.424	0	Fibroblast	Abi3bp
0	3.74058	0.37	0.077	0	Fibroblast	Vit
0	3.39112	0.333	0.043	0	Fibroblast	Lpar1
0	3.06872	0.348	0.062	0	Fibroblast	Sfrp1
0	2.55152	0.501	0.217	0	Fibroblast	Phlda1
0	3.75081	0.337	0.054	0	Fibroblast	Mdk
0	3.02146	0.403	0.121	0	Fibroblast	Papss2
0	3.12084	0.513	0.232	0	Fibroblast	Adamts5
0	2.39233	0.49	0.21	0	Fibroblast	Bhlhe40
0	1.52403	0.383	0.103	0	Fibroblast	Tgfbi
0	3.66201	0.359	0.079	0	Fibroblast	Gpr39
0	4.48631	0.299	0.021	0	Fibroblast	Hsd11b1
0	4.0945	0.322	0.045	0	Fibroblast	Wnt5a
0	2.50729	0.406	0.129	0	Fibroblast	Add3
0	3.79813	0.322	0.047	0	Fibroblast	Efemp1
0	3.90971	0.299	0.026	0	Fibroblast	Prg4
0	4.75981	0.306	0.034	0	Fibroblast	Tcf21
0	3.37203	0.367	0.096	0	Fibroblast	Akap12
0	3.68846	0.292	0.022	0	Fibroblast	Lsamp
0	2.82392	0.408	0.14	0	Fibroblast	Pdgfrl
0	1.86384	0.448	0.181	0	Fibroblast	Ablim1
0	4.91458	0.282	0.017	0	Fibroblast	Il33
0	2.46794	0.597	0.333	0	Fibroblast	Adamts2
0	2.61837	0.347	0.084	0	Fibroblast	C4b
0	5.59431	0.27	0.01	0	Fibroblast	Srpx
0	1.5577	0.404	0.145	0	Fibroblast	Pltp
0	2.2659	0.394	0.135	0	Fibroblast	Cpne8
0	6.1731	0.266	0.008	0	Fibroblast	Inmt
0	3.55321	0.321	0.063	0	Fibroblast	Fst
0	2.23353	0.644	0.386	0	Fibroblast	Pnp
0	2.44666	0.77	0.514	0	Fibroblast	Plpp3
0	3.99873	0.297	0.041	0	Fibroblast	Flrt2
0	3.82983	0.353	0.099	0	Fibroblast	F3
0	3.01465	0.286	0.032	0	Fibroblast	Serpina3n
0	3.54439	0.274	0.023	0	Fibroblast	G0s2
0	2.6419	0.398	0.15	0	Fibroblast	Qpct
0	3.21413	0.348	0.102	0	Fibroblast	Gpc3
0	4.54042	0.302	0.056	0	Fibroblast	Vegfd
0	4.4421	0.258	0.013	0	Fibroblast	Ndufa4l2
0	1.63092	0.434	0.19	0	Fibroblast	Nrp1
0	3.54296	0.312	0.07	0	Fibroblast	Medag
0	2.7878	0.352	0.111	0	Fibroblast	Col4a4
0	4.43566	0.258	0.018	0	Fibroblast	Steap4
0	1.83553	0.455	0.216	0	Fibroblast	Tsc22d3
0	1.96985	0.811	0.574	0	Fibroblast	Mfap5
0	1.93984	0.653	0.42	0	Fibroblast	Mir99ahg
0	1.61499	0.412	0.179	0	Fibroblast	Heg1
0	3.39156	0.262	0.03	0	Fibroblast	Zfp521
0	2.29127	0.29	0.059	0	Fibroblast	Bmp4
0	1.89493	0.576	0.347	0	Fibroblast	Irf1
0	3.47745	0.269	0.041	0	Fibroblast	Penk
0	2.20193	0.439	0.212	0	Fibroblast	Pcdh9
0	2.76315	0.329	0.104	0	Fibroblast	Mfap2
0	2.89685	0.31	0.087	0	Fibroblast	Ctsk
0	3.69898	0.254	0.038	0	Fibroblast	Slc10a6
0	2.99151	0.322	0.107	0	Fibroblast	C1qtnf7
0	1.93242	0.329	0.117	0	Fibroblast	Dapk1
0	1.99162	0.459	0.249	0	Fibroblast	Osmr
0	2.07222	0.746	0.536	0	Fibroblast	Tuba1a
0	2.12922	0.401	0.192	0	Fibroblast	Egfr
0	2.23072	0.368	0.16	0	Fibroblast	Lpl
0	1.62574	0.741	0.533	0	Fibroblast	Klf4
0	2.93721	0.273	0.067	0	Fibroblast	Cdh11
0	2.03185	0.672	0.467	0	Fibroblast	Pdlim2
0	2.40755	0.493	0.291	0	Fibroblast	Htra3
0	2.91248	0.27	0.069	0	Fibroblast	Clec11a
0	2.3857	0.688	0.488	0	Fibroblast	Ccdc80
0	1.50736	0.674	0.475	0	Fibroblast	Socs3
0	1.74755	0.266	0.067	0	Fibroblast	Gda
0	2.41247	0.321	0.123	0	Fibroblast	Prickle1
0	2.8234	0.284	0.089	0	Fibroblast	Cdon
0	3.3266	0.25	0.058	0	Fibroblast	Matn2
0	2.02997	0.363	0.171	0	Fibroblast	Fam102b
0	1.55638	0.61	0.421	0	Fibroblast	Glul
0	1.9636	0.497	0.309	0	Fibroblast	Tgfbr3
0	2.27683	0.328	0.14	0	Fibroblast	Plce1
0	2.11956	0.364	0.177	0	Fibroblast	Csf1
0	1.73374	0.545	0.36	0	Fibroblast	Naaladl2
0	2.15218	0.275	0.091	0	Fibroblast	Rasa3
0	2.42728	0.29	0.109	0	Fibroblast	Tmem204
0	2.26999	0.337	0.158	0	Fibroblast	Socs1
0	1.59223	0.297	0.118	0	Fibroblast	Gas7
0	2.25153	0.342	0.164	0	Fibroblast	Boc
0	1.92538	0.319	0.142	0	Fibroblast	Plscr4
0	2.03846	0.364	0.187	0	Fibroblast	Mrc2
0	2.84448	0.272	0.096	0	Fibroblast	Spry1
0	2.51408	0.353	0.179	0	Fibroblast	Ptgs2
0	2.65497	0.409	0.236	0	Fibroblast	Tnxb
0	1.70998	0.4	0.228	0	Fibroblast	Tenm3
0	2.43392	0.278	0.108	0	Fibroblast	Ndn
0	1.55475	0.657	0.488	0	Fibroblast	Pmp22
0	1.68375	0.634	0.465	0	Fibroblast	Zfpm2
0	2.22812	0.282	0.113	0	Fibroblast	Slc16a2
0	2.14539	0.35	0.183	0	Fibroblast	Thbd
0	2.39068	0.5	0.333	0	Fibroblast	Nr2f2
0	1.81247	0.684	0.519	0	Fibroblast	Islr
0	1.77305	0.798	0.634	0	Fibroblast	Fosb
0	2.54179	0.257	0.095	0	Fibroblast	Myc
0	1.98492	0.941	0.779	0	Fibroblast	Ifitm3
0	1.52898	0.523	0.363	0	Fibroblast	Epb41l2
0	4.03188	0.985	0.826	0	Fibroblast	Gsn
0	1.78478	0.796	0.638	0	Fibroblast	Mt2
0	1.78319	0.606	0.451	0	Fibroblast	Mxra7
0	1.60052	0.522	0.378	0	Fibroblast	Pkd2
0	1.606	0.928	0.788	0	Fibroblast	Col1a2
0	2.07074	0.966	0.826	0	Fibroblast	Tmsb10
0	1.68784	0.807	0.687	0	Fibroblast	Col1a1
0	1.73456	0.855	0.739	0	Fibroblast	Lrp1
0	1.94245	0.947	0.84	0	Fibroblast	Timp2
0	1.57556	0.587	0.481	0	Fibroblast	Mmp23
0	2.13919	0.768	0.678	0	Fibroblast	Gas6
0	1.68364	0.914	0.825	0	Fibroblast	Ctsl
0	2.39993	0.995	0.967	0	Fibroblast	Cst3
1.87646e-301	2.06401	0.295	0.135	4.15372e-297	Fibroblast	1200007C13Rik
8.26006e-300	1.52984	0.507	0.376	1.82845e-295	Fibroblast	Crispld2
1.89426e-299	1.6702	0.25	0.096	4.19314e-295	Fibroblast	Rftn1
4.41543e-282	2.42023	0.254	0.112	9.77399e-278	Fibroblast	H6pd
3.40681e-261	1.53231	0.372	0.221	7.54131e-257	Fibroblast	Lima1
1.388e-255	1.58382	0.37	0.22	3.07247e-251	Fibroblast	Fmnl2
2.01949e-242	1.52273	0.45	0.333	4.47033e-238	Fibroblast	Ddah2
1.06047e-235	1.7428	0.324	0.171	2.34745e-231	Fibroblast	Ifi27l2a
3.57412e-232	1.57509	0.455	0.342	7.91166e-228	Fibroblast	Gstt1
1.8358e-227	1.8279	0.276	0.139	4.06372e-223	Fibroblast	Sox9
5.40453e-216	2.39074	0.383	0.271	1.19635e-211	Fibroblast	Ugdh
2.55111e-214	1.73788	0.264	0.135	5.64714e-210	Fibroblast	Mill2
5.53841e-211	1.82333	0.323	0.195	1.22598e-206	Fibroblast	Adamtsl3
8.38682e-200	1.79262	0.29	0.166	1.85651e-195	Fibroblast	Tm7sf3
1.53551e-199	1.78534	0.431	0.335	3.39901e-195	Fibroblast	Uap1
2.9952e-198	1.62384	0.34	0.217	6.63018e-194	Fibroblast	Nucb2
2.98755e-195	1.82419	0.314	0.196	6.61324e-191	Fibroblast	Bmp1
1.25064e-188	1.75207	0.295	0.174	2.76841e-184	Fibroblast	Omd
1.77984e-188	1.555	0.45	0.357	3.93986e-184	Fibroblast	Maff
2.07857e-181	1.58777	0.381	0.27	4.60111e-177	Fibroblast	Atf5
2.18796e-167	1.54607	0.336	0.226	4.84326e-163	Fibroblast	Rcn1
1.31183e-153	1.54309	0.397	0.313	2.90387e-149	Fibroblast	Gstm5
1.43792e-146	1.67012	0.272	0.169	3.18298e-142	Fibroblast	Lysmd2
1.75864e-144	1.61788	0.416	0.342	3.89293e-140	Fibroblast	Nop58
5.01038e-144	2.26016	0.389	0.301	1.1091e-139	Fibroblast	Sfrp2
3.86735e-143	1.53897	0.429	0.359	8.56076e-139	Fibroblast	Nbl1
2.86071e-140	1.6635	0.274	0.174	6.33247e-136	Fibroblast	Selenbp1
4.07563e-140	1.64241	0.299	0.201	9.02181e-136	Fibroblast	Scara3
8.95323e-137	1.77405	0.297	0.202	1.98189e-132	Fibroblast	Mettl7a1
7.8862e-136	2.28403	0.294	0.201	1.74569e-131	Fibroblast	Adm
2.36076e-133	1.60422	0.297	0.198	5.22578e-129	Fibroblast	Epha3
3.14168e-133	1.53925	0.333	0.24	6.95442e-129	Fibroblast	Scd2
1.52487e-132	1.59406	0.454	0.392	3.37545e-128	Fibroblast	Dnajb1
2.41167e-104	1.62632	0.308	0.232	5.33847e-100	Fibroblast	Cdkn1c
1.63972e-85	2.25912	0.271	0.207	3.62969e-81	Fibroblast	Ccn5
3.46439e-48	1.62799	0.264	0.221	7.66878e-44	Fibroblast	Peg3
6.93152e-37	1.56195	0.336	0.328	1.53436e-32	Fibroblast	Gm12840
0	9.76802	0.891	0.003	0	Leukocytes	Laptm5
0	7.04878	0.845	0.02	0	Leukocytes	Ucp2
0	9.82308	0.819	0.003	0	Leukocytes	Ptprc
0	10.2406	0.807	0.003	0	Leukocytes	Lcp1
0	7.51265	0.815	0.013	0	Leukocytes	Ptpn18
0	5.15299	0.84	0.053	0	Leukocytes	Srgn
0	9.90326	0.792	0.006	0	Leukocytes	Ctss
0	8.68677	0.768	0.008	0	Leukocytes	Arhgap15
0	9.10852	0.756	0.009	0	Leukocytes	Fcer1g
0	9.25367	0.739	0.005	0	Leukocytes	Tyrobp
0	9.77758	0.736	0.003	0	Leukocytes	Dock2
0	9.67656	0.747	0.015	0	Leukocytes	Lyz2
0	9.42797	0.69	0.002	0	Leukocytes	Cd53
0	9.23123	0.682	0.003	0	Leukocytes	Coro1a
0	9.48392	0.675	0.002	0	Leukocytes	Mir142hg
0	9.05222	0.675	0.004	0	Leukocytes	Cd52
0	4.39709	0.753	0.094	0	Leukocytes	Arhgdib
0	7.04008	0.672	0.021	0	Leukocytes	Plek
0	10.0131	0.657	0.007	0	Leukocytes	C1qa
0	5.92177	0.684	0.035	0	Leukocytes	Cotl1
0	9.78919	0.656	0.008	0	Leukocytes	C1qb
0	10.0408	0.654	0.006	0	Leukocytes	C1qc
0	9.26506	0.65	0.004	0	Leukocytes	Cd83
0	9.04943	0.634	0.005	0	Leukocytes	Csf1r
0	9.32236	0.621	0.003	0	Leukocytes	Cybb
0	6.52449	0.636	0.023	0	Leukocytes	Slc9a9
0	8.54277	0.643	0.031	0	Leukocytes	Cd74
0	9.47724	0.611	0.002	0	Leukocytes	Fcgr2b
0	6.92061	0.63	0.023	0	Leukocytes	Fyb
0	6.76589	0.623	0.019	0	Leukocytes	Alox5ap
0	5.21541	0.667	0.065	0	Leukocytes	Unc93b1
0	7.78407	0.607	0.006	0	Leukocytes	Inpp5d
0	10.3986	0.599	0.001	0	Leukocytes	Cd86
0	5.17819	0.747	0.151	0	Leukocytes	Ctsc
0	9.35577	0.594	0.001	0	Leukocytes	Ly86
0	5.91105	0.62	0.028	0	Leukocytes	Lyn
0	10.052	0.592	0.001	0	Leukocytes	Lilrb4a
0	9.90307	0.591	0.002	0	Leukocytes	Ms4a6c
0	9.05807	0.586	0.006	0	Leukocytes	Wfdc17
0	9.2938	0.58	0.001	0	Leukocytes	Spi1
0	7.59814	0.586	0.016	0	Leukocytes	Cd14
0	9.96676	0.57	0.002	0	Leukocytes	C5ar1
0	9.83598	0.569	0.003	0	Leukocytes	Mrc1
0	8.09183	0.568	0.005	0	Leukocytes	Gmfg
0	4.95533	0.593	0.033	0	Leukocytes	Ifi207
0	9.90532	0.558	0.001	0	Leukocytes	Lilr4b
0	4.74347	0.616	0.063	0	Leukocytes	Rgs10
0	9.80988	0.549	0.001	0	Leukocytes	Fcgr3
0	9.72962	0.543	0.001	0	Leukocytes	Adgre1
0	9.41417	0.543	0.002	0	Leukocytes	Ms4a6b
0	9.77109	0.54	0.001	0	Leukocytes	Cd48
0	3.33998	0.673	0.134	0	Leukocytes	Ly6e
0	8.61345	0.544	0.007	0	Leukocytes	Pf4
0	8.17408	0.553	0.024	0	Leukocytes	H2-Ab1
0	9.47598	0.53	0.002	0	Leukocytes	C3ar1
0	5.56286	0.55	0.022	0	Leukocytes	Gng2
0	3.68503	0.719	0.192	0	Leukocytes	Fam49b
0	3.0359	0.623	0.11	0	Leukocytes	Tgfbi
0	3.33438	0.681	0.168	0	Leukocytes	Runx1
0	8.85678	0.529	0.016	0	Leukocytes	H2-Aa
0	4.23004	0.591	0.08	0	Leukocytes	Kctd12
0	7.73568	0.516	0.005	0	Leukocytes	Pla2g7
0	7.55647	0.511	0.006	0	Leukocytes	Prkcb
0	9.84778	0.506	0.001	0	Leukocytes	Bcl2a1b
0	3.79204	0.579	0.075	0	Leukocytes	Trf
0	9.1499	0.506	0.002	0	Leukocytes	Rac2
0	9.83451	0.5	0.001	0	Leukocytes	Gm26740
0	9.30441	0.5	0.004	0	Leukocytes	Ccl6
0	9.41137	0.497	0.001	0	Leukocytes	Cyth4
0	8.54683	0.517	0.022	0	Leukocytes	H2-Eb1
0	10.1177	0.494	0.001	0	Leukocytes	Ms4a7
0	6.82791	0.512	0.022	0	Leukocytes	Cxcl2
0	7.70422	0.494	0.005	0	Leukocytes	Slfn2
0	5.44994	0.51	0.022	0	Leukocytes	Stab1
0	5.00001	0.563	0.075	0	Leukocytes	Marcksl1
0	5.80607	0.507	0.024	0	Leukocytes	Hcls1
0	9.83554	0.483	0.001	0	Leukocytes	Mpeg1
0	5.58093	0.51	0.033	0	Leukocytes	Cd68
0	5.91352	0.49	0.015	0	Leukocytes	Mctp1
0	4.54963	0.579	0.106	0	Leukocytes	Mafb
0	7.87985	0.477	0.004	0	Leukocytes	Nrros
0	4.58317	0.612	0.141	0	Leukocytes	Dab2
0	2.84504	0.682	0.214	0	Leukocytes	Marcks
0	4.17467	0.535	0.071	0	Leukocytes	Sirpa
0	4.14747	0.506	0.042	0	Leukocytes	Ccl2
0	4.22704	0.619	0.159	0	Leukocytes	Plin2
0	6.81239	0.46	0.008	0	Leukocytes	Syk
0	9.38831	0.453	0.001	0	Leukocytes	Aif1
0	10.586	0.452	0.001	0	Leukocytes	Pld4
0	6.85848	0.457	0.007	0	Leukocytes	Fermt3
0	9.05536	0.45	0.002	0	Leukocytes	Rbm47
0	9.04292	0.451	0.004	0	Leukocytes	Rgs1
0	3.19263	0.635	0.191	0	Leukocytes	Rab8b
0	4.47635	0.454	0.011	0	Leukocytes	Cd36
0	7.18881	0.45	0.007	0	Leukocytes	Lpxn
0	9.37057	0.442	0.001	0	Leukocytes	Epsti1
0	7.78889	0.444	0.004	0	Leukocytes	Cxcr4
0	3.69647	0.642	0.203	0	Leukocytes	Tank
0	7.9693	0.447	0.009	0	Leukocytes	Ccl9
0	8.26719	0.455	0.017	0	Leukocytes	F13a1
0	3.37582	0.538	0.101	0	Leukocytes	Psmb8
0	3.4162	0.555	0.12	0	Leukocytes	Sh3kbp1
0	9.13627	0.438	0.003	0	Leukocytes	Ccl4
0	3.99366	0.508	0.076	0	Leukocytes	Tnfaip3
0	4.07002	0.536	0.107	0	Leukocytes	Rgs2
0	9.36722	0.427	0.001	0	Leukocytes	Ikzf1
0	6.6783	0.432	0.007	0	Leukocytes	Arhgap45
0	9.72984	0.426	0.001	0	Leukocytes	Pik3ap1
0	9.42214	0.425	0.001	0	Leukocytes	Ms4a6d
0	6.45229	0.432	0.013	0	Leukocytes	Ncf2
0	9.60489	0.42	0.001	0	Leukocytes	Ptafr
0	3.72515	0.539	0.121	0	Leukocytes	Tm6sf1
0	9.10563	0.418	0.002	0	Leukocytes	Itgb2
0	2.86011	0.579	0.163	0	Leukocytes	Fli1
0	9.21963	0.416	0.001	0	Leukocytes	Arhgap30
0	9.95631	0.416	0.001	0	Leukocytes	Cd300c2
0	8.29934	0.414	0.003	0	Leukocytes	Trem2
0	4.81341	0.456	0.047	0	Leukocytes	Apobec1
0	2.34763	0.612	0.203	0	Leukocytes	Man1a
0	3.52229	0.546	0.138	0	Leukocytes	Rel
0	7.81159	0.412	0.004	0	Leukocytes	Hpgds
0	2.78224	0.717	0.309	0	Leukocytes	Fxyd5
0	5.8945	0.427	0.023	0	Leukocytes	H2-DMa
0	2.85031	0.629	0.229	0	Leukocytes	Pip4k2a
0	9.36364	0.402	0.002	0	Leukocytes	Ccl3
0	6.85286	0.403	0.006	0	Leukocytes	Otulinl
0	6.1309	0.408	0.012	0	Leukocytes	Basp1
0	3.55054	0.534	0.139	0	Leukocytes	Myo5a
0	9.74546	0.394	0.001	0	Leukocytes	Ncf1
0	10.0166	0.394	0.001	0	Leukocytes	Itgam
0	8.87629	0.391	0.001	0	Leukocytes	Nckap1l
0	3.05374	0.69	0.3	0	Leukocytes	Hmgb2
0	5.1263	0.415	0.025	0	Leukocytes	Arrb2
0	9.5829	0.39	0.001	0	Leukocytes	Cd84
0	9.92526	0.39	0.001	0	Leukocytes	Msr1
0	3.83768	0.466	0.077	0	Leukocytes	Cxcl16
0	2.88747	0.657	0.27	0	Leukocytes	Dock10
0	9.25458	0.388	0.001	0	Leukocytes	Cd300a
0	7.9313	0.391	0.005	0	Leukocytes	Selplg
0	2.90397	0.631	0.246	0	Leukocytes	Snx5
0	4.45447	0.419	0.034	0	Leukocytes	Vsir
0	7.18939	0.387	0.003	0	Leukocytes	St8sia4
0	5.46104	0.396	0.016	0	Leukocytes	Iqgap2
0	3.07704	0.612	0.234	0	Leukocytes	Tpd52
0	10.9154	0.378	0.001	0	Leukocytes	Il10ra
0	3.50467	0.449	0.075	0	Leukocytes	Pitpnc1
0	5.34003	0.4	0.029	0	Leukocytes	Arl4c
0	2.98853	0.522	0.151	0	Leukocytes	Mdfic
0	4.71813	0.4	0.033	0	Leukocytes	Rasgef1b
0	7.18981	0.368	0.005	0	Leukocytes	Neurl3
0	8.50537	0.363	0.001	0	Leukocytes	Ptpn6
0	9.54281	0.363	0.001	0	Leukocytes	Clec12a
0	3.46379	0.455	0.094	0	Leukocytes	Prcp
0	9.02931	0.361	0.001	0	Leukocytes	Ighm
0	9.70046	0.36	0.001	0	Leukocytes	Lcp2
0	3.13589	0.438	0.08	0	Leukocytes	Apbb1ip
0	3.01514	0.457	0.099	0	Leukocytes	Cmip
0	3.9137	0.58	0.223	0	Leukocytes	Maf
0	8.84945	0.358	0.001	0	Leukocytes	Evi2a
0	9.64345	0.353	0.001	0	Leukocytes	Clec4a1
0	2.08603	0.518	0.166	0	Leukocytes	Ifi27l2a
0	2.60027	0.747	0.396	0	Leukocytes	Stk17b
0	10.3802	0.352	0.001	0	Leukocytes	Clec4a3
0	9.92001	0.349	0.001	0	Leukocytes	Cd33
0	4.64543	0.385	0.039	0	Leukocytes	Csf2ra
0	4.93603	0.37	0.025	0	Leukocytes	Irf5
0	3.17314	0.476	0.131	0	Leukocytes	Sgpl1
0	9.60064	0.345	0.001	0	Leukocytes	Stap1
0	4.94769	0.36	0.016	0	Leukocytes	Plcl2
0	3.29926	0.527	0.184	0	Leukocytes	Ifi30
0	2.09204	0.656	0.313	0	Leukocytes	Elmo1
0	5.48908	0.363	0.02	0	Leukocytes	Lst1
0	3.35291	0.385	0.043	0	Leukocytes	Mndal
0	9.92277	0.343	0.001	0	Leukocytes	Lair1
0	9.21604	0.343	0.001	0	Leukocytes	Ccr5
0	4.82785	0.377	0.035	0	Leukocytes	Tlr2
0	3.43501	0.418	0.077	0	Leukocytes	Pde3b
0	8.28538	0.343	0.003	0	Leukocytes	Cytip
0	8.93506	0.34	0.001	0	Leukocytes	Tnf
0	2.97313	0.891	0.554	0	Leukocytes	Sh3bgrl3
0	5.50641	0.351	0.014	0	Leukocytes	Myo1f
0	7.41147	0.341	0.005	0	Leukocytes	Nfkbid
0	3.87016	0.386	0.05	0	Leukocytes	Arhgap18
0	5.33309	0.372	0.037	0	Leukocytes	H2-DMb1
0	8.68125	0.336	0.002	0	Leukocytes	Gatm
0	8.49204	0.335	0.002	0	Leukocytes	Blnk
0	7.71847	0.335	0.003	0	Leukocytes	Pirb
0	2.5954	0.499	0.167	0	Leukocytes	Pltp
0	5.53558	0.345	0.013	0	Leukocytes	Irf8
0	4.2906	0.378	0.047	0	Leukocytes	P2ry6
0	7.47335	0.337	0.006	0	Leukocytes	Gpr183
0	7.65661	0.334	0.003	0	Leukocytes	Slc15a3
0	5.46658	0.343	0.013	0	Leukocytes	Rassf2
0	6.80516	0.339	0.009	0	Leukocytes	Fxyd2
0	10.0002	0.331	0.001	0	Leukocytes	Nlrp3
0	8.9729	0.328	0.001	0	Leukocytes	Hcst
0	5.26422	0.348	0.021	0	Leukocytes	Rassf4
0	2.26164	0.668	0.342	0	Leukocytes	Ptprj
0	8.35014	0.327	0.001	0	Leukocytes	Cd37
0	5.08244	0.339	0.013	0	Leukocytes	Gpsm3
0	4.74588	0.361	0.035	0	Leukocytes	Dclre1c
0	9.56393	0.326	0.001	0	Leukocytes	Clec4a2
0	8.42845	0.327	0.002	0	Leukocytes	Pou2f2
0	2.50174	0.741	0.417	0	Leukocytes	Atp2b1
0	2.06411	0.597	0.275	0	Leukocytes	Litaf
0	2.82527	0.484	0.162	0	Leukocytes	Il10rb
0	6.80404	0.325	0.004	0	Leukocytes	Aoah
0	3.135	0.519	0.199	0	Leukocytes	Frmd4b
0	2.55094	0.739	0.419	0	Leukocytes	Dennd4a
0	5.77236	0.337	0.017	0	Leukocytes	Slc43a2
0	1.68493	0.554	0.235	0	Leukocytes	Tsc22d3
0	6.03959	0.329	0.01	0	Leukocytes	Inpp4b
0	3.09979	0.434	0.115	0	Leukocytes	Cyth1
0	10.0507	0.32	0.001	0	Leukocytes	Tlr7
0	5.37417	0.332	0.014	0	Leukocytes	Hpgd
0	2.50515	0.52	0.202	0	Leukocytes	Man2b1
0	9.37761	0.315	0.001	0	Leukocytes	Ptpro
0	2.53776	0.528	0.215	0	Leukocytes	Tnfaip8
0	4.74465	0.335	0.022	0	Leukocytes	Prex1
0	3.75706	0.41	0.097	0	Leukocytes	Hmox1
0	8.8531	0.313	0.002	0	Leukocytes	Mgl2
0	5.56293	0.318	0.009	0	Leukocytes	Shtn1
0	1.98456	0.67	0.362	0	Leukocytes	Ptbp3
0	2.69435	0.468	0.161	0	Leukocytes	Vav3
0	7.51565	0.311	0.005	0	Leukocytes	Samsn1
0	3.74409	0.355	0.05	0	Leukocytes	Il6ra
0	8.31543	0.307	0.002	0	Leukocytes	Ltc4s
0	4.0634	0.338	0.034	0	Leukocytes	Cebpa
0	2.05627	0.688	0.384	0	Leukocytes	Pim1
0	4.42698	0.334	0.031	0	Leukocytes	Tnfrsf1b
0	2.90321	0.351	0.048	0	Leukocytes	Ifi203
0	10.5706	0.304	0.001	0	Leukocytes	Fcrls
0	7.72794	0.305	0.002	0	Leukocytes	AI662270
0	2.48792	0.52	0.218	0	Leukocytes	Grk2
0	7.99763	0.306	0.004	0	Leukocytes	Cd72
0	4.43263	0.325	0.023	0	Leukocytes	Lrrc8d
0	8.13382	0.304	0.002	0	Leukocytes	March1
0	6.94495	0.306	0.004	0	Leukocytes	Slc7a8
0	5.70457	0.309	0.008	0	Leukocytes	Ctla2b
0	4.5755	0.333	0.033	0	Leukocytes	Ccl7
0	2.63834	0.64	0.341	0	Leukocytes	Pid1
0	2.95749	0.432	0.133	0	Leukocytes	Bmp2k
0	6.64839	0.305	0.006	0	Leukocytes	Tbxas1
0	4.86899	0.317	0.018	0	Leukocytes	Ubash3b
0	9.06737	0.3	0.001	0	Leukocytes	Gpr65
0	10.1251	0.301	0.002	0	Leukocytes	Ccl12
0	2.3279	0.548	0.251	0	Leukocytes	Gna13
0	3.01793	0.407	0.11	0	Leukocytes	Metrnl
0	3.78961	0.332	0.036	0	Leukocytes	Tnfaip2
0	10.3341	0.297	0.001	0	Leukocytes	Gpr132
0	5.54252	0.303	0.009	0	Leukocytes	Ptpre
0	8.72179	0.293	0	0	Leukocytes	Cd300ld
0	9.66856	0.293	0	0	Leukocytes	Lrrc25
0	6.02317	0.3	0.008	0	Leukocytes	Lacc1
0	2.62568	0.473	0.181	0	Leukocytes	Sgms1
0	2.94497	0.393	0.102	0	Leukocytes	Baz1a
0	3.7542	0.327	0.036	0	Leukocytes	Fam111a
0	3.36969	0.345	0.054	0	Leukocytes	Eps8
0	6.1931	0.294	0.004	0	Leukocytes	Fmnl1
0	2.51424	0.459	0.17	0	Leukocytes	Cmtm7
0	2.11054	0.7	0.411	0	Leukocytes	Arpc5
0	3.3863	0.36	0.071	0	Leukocytes	Ppm1h
0	2.21051	0.596	0.307	0	Leukocytes	Ssh2
0	3.31289	0.337	0.049	0	Leukocytes	Sp100
0	4.48371	0.359	0.071	0	Leukocytes	Cx3cr1
0	4.46371	0.339	0.052	0	Leukocytes	Itga4
0	2.29418	0.449	0.162	0	Leukocytes	Birc3
0	9.62857	0.288	0.001	0	Leukocytes	Vav1
0	2.84165	0.5	0.214	0	Leukocytes	Lsp1
0	9.46353	0.288	0.002	0	Leukocytes	Folr2
0	2.59374	0.527	0.242	0	Leukocytes	Cd44
0	2.32592	0.336	0.051	0	Leukocytes	Lmo2
0	4.63205	0.318	0.033	0	Leukocytes	Limd2
0	3.04524	0.373	0.088	0	Leukocytes	Lrmda
0	3.12733	0.372	0.087	0	Leukocytes	Tgif1
0	7.10868	0.291	0.006	0	Leukocytes	Gm6377
0	2.09984	0.658	0.374	0	Leukocytes	Ifngr1
0	4.18688	0.304	0.02	0	Leukocytes	Slco2b1
0	3.01361	0.353	0.069	0	Leukocytes	Agmo
0	2.75019	0.46	0.177	0	Leukocytes	Abhd12
0	4.18802	0.316	0.033	0	Leukocytes	Ptk2b
0	4.36416	0.303	0.02	0	Leukocytes	Rab7b
0	8.4173	0.284	0.001	0	Leukocytes	Slamf7
0	2.80845	0.744	0.461	0	Leukocytes	Zeb2
0	10.0174	0.283	0	0	Leukocytes	Hck
0	1.89069	0.508	0.226	0	Leukocytes	Jpt1
0	1.86869	0.465	0.185	0	Leukocytes	H2-T23
0	1.75771	0.526	0.247	0	Leukocytes	Tmem176b
0	10.0829	0.28	0.001	0	Leukocytes	Bcl2a1d
0	2.3231	0.655	0.377	0	Leukocytes	Efhd2
0	6.84825	0.281	0.004	0	Leukocytes	Pik3r5
0	2.16949	0.627	0.35	0	Leukocytes	Grb2
0	3.50758	0.545	0.27	0	Leukocytes	Lgals3
0	2.53325	0.422	0.148	0	Leukocytes	Rhog
0	3.67726	0.717	0.444	0	Leukocytes	Lgmn
0	7.33084	0.275	0.003	0	Leukocytes	Aim2
0	3.33682	0.372	0.1	0	Leukocytes	Ap1b1
0	4.30923	0.303	0.031	0	Leukocytes	Tmem106a
0	4.81705	0.288	0.016	0	Leukocytes	H2-Q7
0	9.66409	0.271	0.001	0	Leukocytes	Clec4d
0	2.24987	0.507	0.238	0	Leukocytes	Ankrd44
0	10.1084	0.27	0.001	0	Leukocytes	Cd163
0	2.70164	0.341	0.072	0	Leukocytes	Abca9
0	3.01297	0.388	0.119	0	Leukocytes	Rreb1
0	2.92358	0.386	0.117	0	Leukocytes	Arhgef3
0	2.91366	0.378	0.11	0	Leukocytes	Cndp2
0	2.43072	0.491	0.224	0	Leukocytes	Gltp
0	3.53247	0.303	0.038	0	Leukocytes	Psmb9
0	2.42631	0.47	0.205	0	Leukocytes	Dock8
0	3.68648	0.296	0.032	0	Leukocytes	Rab3il1
0	8.54796	0.264	0.001	0	Leukocytes	Atp8b4
0	2.46643	0.506	0.243	0	Leukocytes	Gpcpd1
0	6.18701	0.279	0.018	0	Leukocytes	Lyve1
0	2.42283	0.409	0.148	0	Leukocytes	Cdc42se2
0	9.22677	0.262	0.001	0	Leukocytes	Ncf4
0	2.32998	0.568	0.307	0	Leukocytes	Abca1
0	2.0585	0.414	0.154	0	Leukocytes	Tmem176a
0	10.6926	0.26	0	0	Leukocytes	Nfam1
0	3.13305	0.364	0.104	0	Leukocytes	St3gal6
0	5.19316	0.272	0.013	0	Leukocytes	Chd7
0	4.31443	0.289	0.03	0	Leukocytes	Snx8
0	7.41612	0.261	0.002	0	Leukocytes	Adap2
0	2.17506	0.891	0.632	0	Leukocytes	H2-K1
0	9.20426	0.26	0.002	0	Leukocytes	Il1b
0	4.09916	0.296	0.038	0	Leukocytes	Retreg1
0	5.60258	0.273	0.015	0	Leukocytes	Cfp
0	4.01757	0.279	0.022	0	Leukocytes	Ifi204
0	5.85232	0.266	0.01	0	Leukocytes	Sema4a
0	8.81712	0.257	0.001	0	Leukocytes	Runx3
0	4.61081	0.271	0.016	0	Leukocytes	Slc11a1
0	5.02817	0.269	0.017	0	Leukocytes	Pik3cd
0	2.82378	0.366	0.114	0	Leukocytes	Crlf3
0	2.75753	0.325	0.073	0	Leukocytes	Trerf1
0	6.35731	0.257	0.006	0	Leukocytes	Lat2
0	8.43021	0.252	0.001	0	Leukocytes	Kcnk13
0	3.98423	0.298	0.047	0	Leukocytes	Abcg1
0	6.36523	0.258	0.007	0	Leukocytes	Pmaip1
0	2.04078	0.697	0.446	0	Leukocytes	Trps1
0	2.73966	0.346	0.096	0	Leukocytes	Pycard
0	3.17442	0.339	0.092	0	Leukocytes	Rgl1
0	2.1664	0.396	0.149	0	Leukocytes	Cdk14
0	3.60975	0.293	0.048	0	Leukocytes	Apobec3
0	3.9911	0.275	0.031	0	Leukocytes	Trim25
0	3.77344	0.3	0.057	0	Leukocytes	Stard8
0	5.39846	0.255	0.013	0	Leukocytes	Arhgap22
0	3.56611	0.295	0.056	0	Leukocytes	AU020206
0	1.99672	0.371	0.132	0	Leukocytes	Gas7
0	2.04045	0.344	0.105	0	Leukocytes	Rftn1
0	3.41553	0.29	0.052	0	Leukocytes	Ezr
0	2.59533	0.403	0.166	0	Leukocytes	Cdk6
0	2.78697	0.347	0.11	0	Leukocytes	Smap2
0	2.09487	0.524	0.288	0	Leukocytes	Tut7
0	2.35582	0.464	0.228	0	Leukocytes	Ap2a2
0	2.37892	0.385	0.149	0	Leukocytes	Synj1
0	2.80064	0.313	0.077	0	Leukocytes	Man1c1
0	2.2099	0.411	0.175	0	Leukocytes	Taok3
0	2.63342	0.345	0.109	0	Leukocytes	Immp2l
0	2.3506	0.395	0.163	0	Leukocytes	Mfsd1
0	3.206	0.349	0.117	0	Leukocytes	Ccrl2
0	4.08095	0.259	0.029	0	Leukocytes	Gmip
0	3.82707	0.253	0.025	0	Leukocytes	Prkch
0	2.74514	0.327	0.099	0	Leukocytes	5031439G07Rik
0	2.27444	0.386	0.158	0	Leukocytes	Arhgef6
0	2.37538	0.356	0.128	0	Leukocytes	Csk
0	3.13577	0.322	0.095	0	Leukocytes	Bcl2l11
0	4.5745	0.251	0.025	0	Leukocytes	AW112010
0	4.40074	0.262	0.037	0	Leukocytes	Dusp2
0	4.08478	0.26	0.035	0	Leukocytes	Gngt2
0	1.93663	0.494	0.269	0	Leukocytes	Tbc1d5
0	1.73394	0.803	0.579	0	Leukocytes	Rap1b
0	1.83889	0.78	0.557	0	Leukocytes	Npc2
0	3.24154	0.268	0.046	0	Leukocytes	Tspan14
0	3.47531	0.273	0.052	0	Leukocytes	Il4ra
0	4.17469	0.258	0.038	0	Leukocytes	Slamf9
0	1.79372	0.527	0.31	0	Leukocytes	Wipf1
0	3.13885	0.287	0.07	0	Leukocytes	Fam107b
0	2.5449	0.337	0.121	0	Leukocytes	Sdc3
0	3.01387	0.261	0.045	0	Leukocytes	Trim30a
0	2.72834	0.268	0.052	0	Leukocytes	Hfe
0	2.43476	0.385	0.17	0	Leukocytes	Rab31
0	2.77258	0.345	0.13	0	Leukocytes	Pepd
0	1.88406	0.545	0.331	0	Leukocytes	Ehd4
0	1.68368	0.596	0.382	0	Leukocytes	Dleu2
0	3.79988	0.262	0.049	0	Leukocytes	Pag1
0	3.17076	0.272	0.059	0	Leukocytes	Zfp710
0	3.42074	0.262	0.049	0	Leukocytes	Arhgap26
0	2.86772	0.279	0.066	0	Leukocytes	Tcirg1
0	3.25216	0.253	0.041	0	Leukocytes	Ptger4
0	2.6605	0.269	0.059	0	Leukocytes	Sh3bp5
0	2.25887	0.49	0.28	0	Leukocytes	Snx2
0	2.23592	0.353	0.144	0	Leukocytes	Ifnar1
0	1.83773	0.593	0.384	0	Leukocytes	Vmp1
0	1.79968	0.714	0.505	0	Leukocytes	Neat1
0	2.67829	0.338	0.13	0	Leukocytes	Stk4
0	2.2587	0.315	0.109	0	Leukocytes	Arap1
0	2.85346	0.708	0.502	0	Leukocytes	Rbpj
0	3.42449	0.255	0.052	0	Leukocytes	Nceh1
0	2.58358	0.293	0.092	0	Leukocytes	Tep1
0	2.49667	0.305	0.108	0	Leukocytes	Gtdc1
0	2.58717	0.264	0.075	0	Leukocytes	Mcub
0	2.6638	0.265	0.076	0	Leukocytes	Gch1
0	1.70348	0.598	0.411	0	Leukocytes	Hexa
0	2.99331	0.255	0.068	0	Leukocytes	Got1
0	1.92003	0.603	0.418	0	Leukocytes	Ctsa
0	1.59772	0.718	0.538	0	Leukocytes	Zfp36l2
0	1.61504	0.647	0.474	0	Leukocytes	Dazap2
0	2.37204	0.727	0.567	0	Leukocytes	Apoe
0	2.01336	0.859	0.717	0	Leukocytes	Btg1
0	1.90984	0.921	0.782	0	Leukocytes	H2-D1
0	2.59517	0.694	0.556	0	Leukocytes	Grn
0	1.67299	0.859	0.722	0	Leukocytes	Mcl1
0	2.00347	0.853	0.742	0	Leukocytes	Cyba
0	1.54009	0.751	0.643	0	Leukocytes	Sub1
0	1.84446	0.954	0.852	0	Leukocytes	B2m
0	1.56768	0.825	0.771	0	Leukocytes	H2afz
0	1.80907	0.863	0.814	0	Leukocytes	Serinc3
0	2.04811	0.96	0.927	0	Leukocytes	Ftl1
0	1.7214	0.985	0.96	0	Leukocytes	H3f3b
0	2.40718	0.794	0.817	0	Leukocytes	Ctsb
0	1.90542	0.831	0.822	0	Leukocytes	Psap
7.41e-306	2.38469	0.375	0.166	1.64028e-301	Leukocytes	Dgkd
7.92947e-306	1.68881	0.614	0.451	1.75527e-301	Leukocytes	Nfe2l2
9.72154e-304	2.16209	0.297	0.101	2.15196e-299	Leukocytes	Fyn
1.0017e-300	1.62864	0.673	0.579	2.21737e-296	Leukocytes	Ctsz
3.81807e-298	2.11908	0.328	0.124	8.45168e-294	Leukocytes	Arhgap31
5.13964e-297	2.02103	0.462	0.248	1.13771e-292	Leukocytes	Srgap2
9.63272e-297	2.02195	0.465	0.256	2.1323e-292	Leukocytes	Ptpn1
3.60223e-296	2.29442	0.304	0.111	7.97389e-292	Leukocytes	Atxn7l1
1.51479e-295	2.10097	0.544	0.353	3.35314e-291	Leukocytes	Tmcc1
8.46064e-295	2.09518	0.447	0.233	1.87285e-290	Leukocytes	Samhd1
2.03466e-294	1.82149	0.676	0.566	4.50392e-290	Leukocytes	Nfkbiz
2.2073e-293	2.30441	0.322	0.125	4.88608e-289	Leukocytes	P2rx4
2.60853e-293	1.86385	0.458	0.244	5.77425e-289	Leukocytes	Tgfb1
1.32992e-291	2.22147	0.38	0.174	2.94391e-287	Leukocytes	Bin1
1.72998e-290	2.4039	0.288	0.103	3.82949e-286	Leukocytes	Casp8
7.32362e-289	2.33693	0.273	0.092	1.62116e-284	Leukocytes	Twf2
1.06591e-285	2.18926	0.28	0.096	2.35949e-281	Leukocytes	St3gal1
6.48639e-282	1.60879	0.57	0.389	1.43583e-277	Leukocytes	Fnbp1
1.38253e-276	1.57791	0.598	0.437	3.06037e-272	Leukocytes	Rnf130
1.0001e-275	2.59918	0.303	0.116	2.21382e-271	Leukocytes	Nabp1
5.968e-271	1.83611	0.33	0.131	1.32108e-266	Leukocytes	Psmb10
4.81882e-270	2.29848	0.305	0.117	1.06669e-265	Leukocytes	Bach2
7.44623e-269	1.5818	0.352	0.142	1.6483e-264	Leukocytes	Dapk1
2.18505e-266	2.06925	0.384	0.186	4.83682e-262	Leukocytes	Gusb
1.81016e-264	1.53166	0.539	0.346	4.00696e-260	Leukocytes	Slc3a2
3.39531e-264	2.75064	0.277	0.103	7.51585e-260	Leukocytes	Etv3
8.81046e-264	2.06545	0.298	0.114	1.95028e-259	Leukocytes	Zc3h12a
2.6059e-263	1.5626	0.564	0.395	5.76842e-259	Leukocytes	Ubl3
7.23033e-263	2.33234	0.396	0.201	1.60051e-258	Leukocytes	Capg
3.4377e-262	1.61869	0.562	0.396	7.60969e-258	Leukocytes	Skap2
4.87494e-261	2.4775	0.33	0.144	1.07912e-256	Leukocytes	Ophn1
7.26609e-259	2.4391	0.285	0.108	1.60842e-254	Leukocytes	Snx29
4.84761e-258	2.14764	0.27	0.093	1.07307e-253	Leukocytes	Gda
6.65201e-258	1.93582	0.412	0.215	1.47249e-253	Leukocytes	Acer3
1.30834e-255	2.00127	0.374	0.178	2.89613e-251	Leukocytes	Adam17
1.57236e-253	2.03202	0.371	0.177	3.48059e-249	Leukocytes	Tmem243
6.04131e-253	2.33962	0.27	0.099	1.3373e-248	Leukocytes	Sdf2l1
1.90589e-251	2.06605	0.337	0.149	4.21889e-247	Leukocytes	Dram2
5.18464e-251	2.03545	0.382	0.189	1.14767e-246	Leukocytes	Scamp2
2.31275e-249	2.48048	0.254	0.091	5.1195e-245	Leukocytes	Ntpcr
5.41885e-249	1.90785	0.439	0.248	1.19952e-244	Leukocytes	Cbl
1.34143e-247	1.98744	0.467	0.28	2.96938e-243	Leukocytes	Osbpl8
1.56943e-244	2.20972	0.306	0.128	3.4741e-240	Leukocytes	Plekhm3
4.63334e-243	1.60587	0.542	0.369	1.02564e-238	Leukocytes	Dennd1a
1.74019e-242	2.05522	0.374	0.181	3.85208e-238	Leukocytes	Zc3hav1
3.69434e-238	2.14176	0.34	0.158	8.17779e-234	Leukocytes	Tmem189
5.08721e-238	2.5794	0.27	0.105	1.1261e-233	Leukocytes	Ogfrl1
2.99402e-236	1.75332	0.418	0.225	6.62756e-232	Leukocytes	Bcl10
1.07612e-233	2.11767	0.27	0.103	2.3821e-229	Leukocytes	Vrk2
1.08013e-228	2.10733	0.353	0.171	2.39098e-224	Leukocytes	Bach1
4.388e-228	2.02476	0.308	0.132	9.71327e-224	Leukocytes	Sft2d1
3.8437e-225	2.10975	0.296	0.124	8.5084e-221	Leukocytes	Lcorl
5.39617e-225	2.09594	0.333	0.156	1.1945e-220	Leukocytes	Atp6v1b2
5.40518e-221	2.4465	0.266	0.104	1.19649e-216	Leukocytes	Slc8b1
2.09322e-220	2.12532	0.309	0.137	4.63356e-216	Leukocytes	Znrf2
2.19211e-220	1.53775	0.501	0.319	4.85246e-216	Leukocytes	Kdm6b
2.38111e-217	2.00317	0.374	0.196	5.27082e-213	Leukocytes	Jarid2
3.37154e-213	2.38164	0.269	0.11	7.46323e-209	Leukocytes	Slc38a1
2.37187e-212	1.96963	0.275	0.112	5.25037e-208	Leukocytes	B4galt5
7.21246e-212	2.01306	0.297	0.13	1.59655e-207	Leukocytes	Ivns1abp
1.41211e-211	2.0264	0.338	0.164	3.12586e-207	Leukocytes	Cerk
1.73537e-209	1.8273	0.42	0.243	3.84142e-205	Leukocytes	Dip2b
5.42593e-208	2.36196	0.26	0.106	1.20108e-203	Leukocytes	Abr
1.08852e-206	1.9814	0.317	0.148	2.40955e-202	Leukocytes	Map3k1
1.70301e-206	2.38234	0.288	0.127	3.76978e-202	Leukocytes	Sgpp1
9.03761e-204	1.51775	0.429	0.236	2.00057e-199	Leukocytes	Casp4
1.35891e-203	1.80342	0.345	0.173	3.00808e-199	Leukocytes	Necap2
4.43531e-203	1.8358	0.406	0.23	9.818e-199	Leukocytes	Slc12a6
8.64629e-202	2.14732	0.707	0.773	1.91394e-197	Leukocytes	Selenop
2.40593e-201	1.77031	0.436	0.269	5.32578e-197	Leukocytes	Plekho2
7.4672e-201	2.05944	0.363	0.195	1.65294e-196	Leukocytes	Fem1c
9.30239e-201	1.74985	0.455	0.285	2.05918e-196	Leukocytes	Eps15
3.08618e-197	1.75347	0.405	0.232	6.83156e-193	Leukocytes	Kdm7a
4.32833e-197	1.85755	0.573	0.48	9.58118e-193	Leukocytes	Ninj1
5.09321e-197	2.14031	0.352	0.187	1.12743e-192	Leukocytes	Zdhhc14
3.529e-196	1.65221	0.492	0.342	7.8118e-192	Leukocytes	Mapkapk2
4.07109e-194	2.26042	0.263	0.112	9.01176e-190	Leukocytes	Adam19
2.73706e-193	1.81129	0.305	0.141	6.05875e-189	Leukocytes	Atp8a1
3.47676e-193	1.86931	0.349	0.182	7.69616e-189	Leukocytes	Acsl4
8.3947e-193	2.00641	0.416	0.256	1.85825e-188	Leukocytes	Spred1
2.88617e-192	2.03659	0.283	0.127	6.38883e-188	Leukocytes	Sgk3
1.25091e-190	1.92644	0.388	0.222	2.76901e-186	Leukocytes	Aftph
1.68666e-189	2.1649	0.258	0.109	3.7336e-185	Leukocytes	Galnt7
8.12638e-188	2.07328	0.258	0.108	1.79886e-183	Leukocytes	Pxn
1.02581e-185	1.86024	0.42	0.263	2.27074e-181	Leukocytes	Itpkb
4.54336e-185	2.08685	0.294	0.139	1.00572e-180	Leukocytes	Fam117b
3.84287e-184	1.63119	0.434	0.274	8.50657e-180	Leukocytes	Uvrag
3.95929e-183	2.37249	0.272	0.125	8.76429e-179	Leukocytes	B4galt6
6.16368e-179	1.6165	0.431	0.267	1.36439e-174	Leukocytes	Rnf19b
2.20152e-177	1.82703	0.321	0.164	4.87328e-173	Leukocytes	Ikbkb
1.3345e-175	2.09815	0.295	0.143	2.95406e-171	Leukocytes	N4bp1
1.33382e-172	1.73601	0.371	0.215	2.95255e-168	Leukocytes	Mapk14
5.7563e-172	1.97151	0.34	0.184	1.27421e-167	Leukocytes	Pbx3
5.04743e-171	1.93666	0.261	0.116	1.1173e-166	Leukocytes	Elf4
1.47565e-170	1.75544	0.346	0.192	3.26649e-166	Leukocytes	Mkrn1
4.86372e-170	1.73988	0.337	0.177	1.07663e-165	Leukocytes	Tcn2
2.14117e-168	1.93064	0.254	0.109	4.7397e-164	Leukocytes	Itpr2
3.94852e-168	1.61026	0.393	0.231	8.74044e-164	Leukocytes	Klf10
4.77818e-167	1.9068	0.305	0.153	1.0577e-162	Leukocytes	Snx10
1.54123e-166	1.86774	0.307	0.156	3.41167e-162	Leukocytes	Rab43
2.75267e-163	1.76232	0.358	0.205	6.09332e-159	Leukocytes	Soat1
4.29986e-160	1.81398	0.325	0.174	9.51816e-156	Leukocytes	Jdp2
7.22484e-160	1.87719	0.31	0.163	1.59929e-155	Leukocytes	Mrtfa
3.86476e-158	2.02098	0.283	0.14	8.55503e-154	Leukocytes	Orai1
1.05859e-156	1.8058	0.305	0.158	2.34328e-152	Leukocytes	Git2
5.86659e-156	1.80774	0.305	0.158	1.29863e-151	Leukocytes	Enox2
6.6333e-156	1.84906	0.437	0.304	1.46835e-151	Leukocytes	Mtss1
1.93514e-155	1.91338	0.273	0.132	4.28363e-151	Leukocytes	Ugcg
1.48484e-152	2.0434	0.273	0.135	3.28683e-148	Leukocytes	Plekhb2
4.71196e-152	1.98434	0.258	0.122	1.04304e-147	Leukocytes	Rcc2
7.09811e-152	1.73861	0.317	0.17	1.57124e-147	Leukocytes	Dennd1b
2.57635e-150	1.66127	0.37	0.221	5.70302e-146	Leukocytes	Lipa
1.22001e-149	1.66417	0.328	0.176	2.70061e-145	Leukocytes	Abcb1b
2.98551e-149	2.23132	0.303	0.164	6.60872e-145	Leukocytes	Hgsnat
3.00995e-145	1.74035	0.314	0.171	6.66282e-141	Leukocytes	Relb
6.59819e-143	1.62128	0.413	0.279	1.46058e-138	Leukocytes	Prkcd
3.61797e-140	1.56041	0.375	0.234	8.00873e-136	Leukocytes	Arih2
2.79398e-138	2.46007	0.281	0.151	6.18475e-134	Leukocytes	Malt1
6.31143e-137	1.71889	0.355	0.219	1.3971e-132	Leukocytes	Mapk6
1.2508e-136	1.73796	0.354	0.214	2.76877e-132	Leukocytes	Dusp16
1.47995e-134	1.65084	0.349	0.211	3.27602e-130	Leukocytes	Dock11
3.72009e-134	1.7576	0.28	0.147	8.23479e-130	Leukocytes	Tet2
5.29236e-132	1.78024	0.295	0.163	1.17152e-127	Leukocytes	Nsf
5.36421e-131	1.95329	0.342	0.216	1.18742e-126	Leukocytes	Itsn1
1.87958e-130	2.92895	0.285	0.161	4.16065e-126	Leukocytes	Vps37b
7.3702e-128	1.60248	0.302	0.173	1.63147e-123	Leukocytes	Ciao2a
4.88924e-127	1.92546	0.263	0.137	1.08228e-122	Leukocytes	Rnf169
5.25436e-125	1.69117	0.309	0.179	1.16311e-120	Leukocytes	Pkn1
9.53137e-125	1.57805	0.289	0.157	2.10986e-120	Leukocytes	Trib1
3.28912e-124	1.52015	0.327	0.193	7.28079e-120	Leukocytes	Epn1
2.56657e-121	1.89404	0.41	0.282	5.68136e-117	Leukocytes	Gm26917
2.62816e-121	1.5843	0.319	0.187	5.8177e-117	Leukocytes	Tmem164
6.37116e-120	1.67943	0.299	0.173	1.41032e-115	Leukocytes	Washc2
1.59522e-116	1.51903	0.369	0.243	3.53117e-112	Leukocytes	Dnm2
2.43681e-116	1.55754	0.277	0.151	5.39413e-112	Leukocytes	Rnaset2a
6.75774e-115	1.77355	0.383	0.267	1.49589e-110	Leukocytes	Lifr
2.103e-114	1.5288	0.438	0.324	4.6552e-110	Leukocytes	Tut4
2.25052e-113	1.52824	0.389	0.271	4.98175e-109	Leukocytes	Mitf
8.05939e-112	1.69109	0.286	0.164	1.78403e-107	Leukocytes	Eml4
1.83423e-110	1.55006	0.426	0.32	4.06026e-106	Leukocytes	Gm2a
1.09578e-109	1.56531	0.335	0.214	2.42561e-105	Leukocytes	Cmtm6
3.36953e-109	1.59401	0.508	0.438	7.45879e-105	Leukocytes	Ccnd3
8.17277e-108	1.62282	0.283	0.164	1.80912e-103	Leukocytes	Pgd
1.58014e-107	1.80063	0.294	0.178	3.4978e-103	Leukocytes	Mpp1
3.87083e-107	1.73332	0.375	0.265	8.56846e-103	Leukocytes	Dnajc15
5.03907e-107	1.89323	0.26	0.146	1.11545e-102	Leukocytes	Lbr
9.79835e-106	1.62407	0.292	0.173	2.16896e-101	Leukocytes	Rnpep
3.70782e-104	1.54589	0.331	0.21	8.20763e-100	Leukocytes	Smyd3
9.81307e-103	1.85596	0.27	0.158	2.17222e-98	Leukocytes	Fnip2
8.78713e-101	1.65267	0.261	0.146	1.94512e-96	Leukocytes	Rbbp8
2.40715e-100	1.89709	0.253	0.143	5.32847e-96	Leukocytes	Plaur
1.63919e-99	1.8471	0.277	0.167	3.6285e-95	Leukocytes	Rcsd1
2.94358e-99	1.71996	0.331	0.223	6.5159e-95	Leukocytes	Ets2
1.11439e-98	1.64525	0.367	0.265	2.46682e-94	Leukocytes	Gna12
6.35043e-98	1.58733	0.274	0.161	1.40573e-93	Leukocytes	Hmgcl
1.16759e-95	1.61512	0.494	0.443	2.58459e-91	Leukocytes	Wwp1
4.15001e-95	1.69862	0.464	0.403	9.18646e-91	Leukocytes	Psd3
6.16207e-95	1.69039	0.256	0.147	1.36404e-90	Leukocytes	Slc16a10
4.86131e-93	1.52089	0.355	0.245	1.0761e-88	Leukocytes	Fkbp5
4.07434e-91	1.67929	0.259	0.153	9.01897e-87	Leukocytes	Sh3pxd2b
9.30325e-89	1.76984	0.261	0.156	2.05937e-84	Leukocytes	Dusp6
6.22391e-88	1.5819	0.331	0.225	1.37772e-83	Leukocytes	Antxr2
6.35999e-75	1.58421	0.27	0.174	1.40785e-70	Leukocytes	Per1
9.72272e-75	1.51756	0.282	0.186	2.15222e-70	Leukocytes	Ubac2
1.04043e-51	1.54229	0.275	0.202	2.3031e-47	Leukocytes	Rp2
3.02013e-47	1.7418	0.3	0.236	6.68535e-43	Leukocytes	Glipr1
0	5.97472	0.919	0.077	0	SMC_minor	Adamtsl1
0	2.63077	0.767	0.166	0	SMC_minor	Lamc3
0	5.63384	0.61	0.018	0	SMC_minor	Mdga2
0	3.75043	0.664	0.084	0	SMC_minor	Prrx2
0	3.27665	0.683	0.132	0	SMC_minor	Frzb
0	3.4636	0.781	0.253	0	SMC_minor	Rgs5
0	2.63905	0.802	0.279	0	SMC_minor	Fez1
0	4.62773	0.536	0.034	0	SMC_minor	Prss12
0	4.16964	0.552	0.058	0	SMC_minor	Cdh18
0	1.785	0.672	0.179	0	SMC_minor	Tshz2
0	3.0607	0.599	0.124	0	SMC_minor	Cacna2d3
0	1.82476	0.875	0.403	0	SMC_minor	Lama2
0	2.53068	0.858	0.4	0	SMC_minor	Phactr1
0	2.15482	0.834	0.396	0	SMC_minor	Sema3c
0	2.93955	0.843	0.413	0	SMC_minor	Pde4d
0	1.5312	0.626	0.202	0	SMC_minor	Thbd
0	2.73884	0.509	0.096	0	SMC_minor	Gria3
0	1.93604	0.837	0.426	0	SMC_minor	Gxylt2
0	1.60507	0.762	0.356	0	SMC_minor	Nbl1
0	4.79263	0.422	0.016	0	SMC_minor	Dlx5
0	1.73728	0.918	0.514	0	SMC_minor	Smoc1
0	2.12634	0.699	0.303	0	SMC_minor	Sfrp2
0	2.17121	0.758	0.366	0	SMC_minor	Bmpr1b
0	2.72263	0.58	0.188	0	SMC_minor	Lrrc17
0	1.82555	0.594	0.203	0	SMC_minor	Cntfr
0	5.82001	0.4	0.01	0	SMC_minor	Hs6st3
0	1.98254	0.547	0.166	0	SMC_minor	Tspan7
0	3.13563	0.463	0.099	0	SMC_minor	Grid2
0	2.31825	0.823	0.46	0	SMC_minor	Tmtc2
0	2.00003	0.724	0.376	0	SMC_minor	Osr1
0	2.26866	0.538	0.196	0	SMC_minor	Uaca
0	3.71315	0.407	0.066	0	SMC_minor	Mia
0	4.40543	0.472	0.135	0	SMC_minor	Kcnip4
0	2.57299	0.43	0.1	0	SMC_minor	Lnx1
0	5.70694	0.333	0.007	0	SMC_minor	Dlx6
0	2.59429	0.448	0.123	0	SMC_minor	Zfp385b
0	3.0617	0.376	0.052	0	SMC_minor	Negr1
0	5.75538	0.322	0.007	0	SMC_minor	Dlx6os1
0	1.86536	0.956	0.657	0	SMC_minor	Htra1
0	5.88816	0.301	0.007	0	SMC_minor	Coch
0	2.69763	0.34	0.048	0	SMC_minor	Spock2
0	4.68122	0.302	0.021	0	SMC_minor	Hhip
0	4.76765	0.28	0.01	0	SMC_minor	Stk32a
0	2.74826	0.296	0.047	0	SMC_minor	Ednra
0	3.15286	0.28	0.049	0	SMC_minor	Dgki
0	3.49444	0.266	0.041	0	SMC_minor	Ppp1r1b
1.84095e-302	2.29478	0.348	0.082	4.07512e-298	SMC_minor	2610307P16Rik
3.4295e-296	2.57574	0.384	0.102	7.59154e-292	SMC_minor	Pgr
3.13471e-281	1.65292	0.741	0.394	6.939e-277	SMC_minor	Prdm6
2.12772e-277	2.19732	0.434	0.134	4.70992e-273	SMC_minor	Crispld1
8.62634e-276	2.22133	0.523	0.198	1.90953e-271	SMC_minor	Cacna1d
6.61231e-274	1.54109	0.766	0.438	1.4637e-269	SMC_minor	Col15a1
1.15039e-263	1.53245	0.809	0.531	2.54651e-259	SMC_minor	Pde5a
3.96798e-253	2.24642	0.366	0.102	8.78351e-249	SMC_minor	Itgb8
6.77017e-251	1.74618	0.584	0.252	1.49864e-246	SMC_minor	Ptprk
2.30299e-248	2.55672	0.297	0.071	5.09791e-244	SMC_minor	Foxf1
2.27311e-234	2.52485	0.533	0.233	5.03175e-230	SMC_minor	2210407C18Rik
1.82058e-233	2.3184	0.338	0.095	4.03004e-229	SMC_minor	Lnx2
3.12703e-230	1.90941	0.355	0.098	6.92199e-226	SMC_minor	Lpar1
3.19853e-216	1.73616	0.499	0.202	7.08028e-212	SMC_minor	Erg
2.69865e-215	2.68617	0.253	0.059	5.97373e-211	SMC_minor	4930511M06Rik
9.29887e-211	2.28222	0.374	0.124	2.0584e-206	SMC_minor	Kcnc4
1.14066e-210	1.69336	0.554	0.251	2.52496e-206	SMC_minor	Bdnf
6.72998e-204	1.84354	0.331	0.096	1.48975e-199	SMC_minor	Sgip1
5.63815e-200	1.82432	0.459	0.186	1.24806e-195	SMC_minor	Enpp5
1.37574e-197	2.04631	0.317	0.093	3.04535e-193	SMC_minor	Ttll5
6.77237e-195	1.88379	0.344	0.108	1.49913e-190	SMC_minor	9930111J21Rik2
2.02182e-192	2.47526	0.361	0.121	4.4755e-188	SMC_minor	Enpp2
4.9221e-177	1.87467	0.305	0.092	1.08956e-172	SMC_minor	Glis3
1.81565e-170	1.80152	0.574	0.313	4.01913e-166	SMC_minor	Chsy3
4.35902e-170	1.50177	0.502	0.236	9.64912e-166	SMC_minor	Aqp1
7.38336e-166	1.58367	0.39	0.147	1.63438e-161	SMC_minor	Gpc3
1.86029e-158	1.56429	0.516	0.255	4.11795e-154	SMC_minor	F2r
3.73175e-158	1.5993	0.502	0.242	8.26061e-154	SMC_minor	Syn3
1.07869e-145	1.91681	0.259	0.079	2.38778e-141	SMC_minor	Timp4
4.30962e-144	2.06624	0.256	0.079	9.53977e-140	SMC_minor	Mpped2
1.75228e-143	1.50982	0.542	0.302	3.87884e-139	SMC_minor	Tfdp2
3.65171e-139	1.71277	0.351	0.137	8.08342e-135	SMC_minor	Kcnj8
7.92647e-137	1.62563	0.42	0.192	1.7546e-132	SMC_minor	Dtd1
2.30925e-134	1.86346	0.334	0.131	5.11176e-130	SMC_minor	Vstm4
1.4028e-126	1.74195	0.283	0.101	3.10524e-122	SMC_minor	Mpzl1
1.83116e-119	1.63302	0.376	0.169	4.05346e-115	SMC_minor	Fabp3
1.57679e-113	1.63695	0.289	0.11	3.49038e-109	SMC_minor	Tiam2
1.64576e-113	1.69271	0.256	0.091	3.64305e-109	SMC_minor	Bpgm
3.90843e-99	1.97265	0.339	0.161	8.6517e-95	SMC_minor	Lrrtm3
8.31068e-62	1.60873	0.256	0.122	1.83965e-57	SMC_minor	Pdzrn4
0	3.50418	0.811	0.229	0	SEM	Timp1
0	2.88515	0.781	0.229	0	SEM	Vcam1
0	2.20739	0.616	0.143	0	SEM	Frzb
0	3.82636	0.57	0.107	0	SEM	Tnfrsf11b
0	3.17927	0.546	0.087	0	SEM	Col8a1
0	2.97377	0.507	0.095	0	SEM	Thbs1
0	5.83906	0.417	0.038	0	SEM	Spp1
0	2.74139	0.417	0.07	0	SEM	Rarres1
0	2.43215	0.931	0.589	0	SEM	Fn1
0	2.5763	0.374	0.058	0	SEM	Cx3cl1
0	3.19529	0.268	0.021	0	SEM	Gpr176
0	4.59054	0.261	0.02	0	SEM	Lcn2
6.85651e-306	2.08329	0.998	0.89	1.51776e-301	SEM	Mgp
9.63259e-304	2.28429	0.658	0.219	2.13227e-299	SEM	Sncg
2.40737e-300	2.10951	0.324	0.051	5.32895e-296	SEM	Nav3
3.14652e-296	2.63221	0.541	0.148	6.96515e-292	SEM	Crlf1
2.19954e-295	1.73192	0.294	0.043	4.8689e-291	SEM	Slco2a1
5.82179e-288	1.99179	0.47	0.106	1.28871e-283	SEM	Dclk1
1.41376e-279	2.24144	0.36	0.067	3.1295e-275	SEM	Sdc1
5.59595e-238	1.7124	0.904	0.596	1.23872e-233	SEM	Col5a2
4.03444e-229	2.18122	0.665	0.267	8.93063e-225	SEM	Ltbp2
1.14414e-224	2.08476	0.683	0.282	2.53267e-220	SEM	Ppic
3.43962e-223	2.1123	0.48	0.136	7.61394e-219	SEM	Scx
1.28706e-215	2.05659	0.677	0.262	2.84903e-211	SEM	Lum
6.14568e-211	2.13861	0.475	0.142	1.36041e-206	SEM	Tnc
1.1914e-208	2.43966	0.465	0.138	2.63727e-204	SEM	Crispld1
5.83022e-208	1.6681	0.942	0.707	1.29058e-203	SEM	Col1a1
7.12446e-198	2.56911	0.349	0.083	1.57707e-193	SEM	Serpina3n
3.90523e-191	1.60894	0.919	0.631	8.64461e-187	SEM	Clu
9.43982e-180	1.87795	0.262	0.053	2.0896e-175	SEM	Gm15867
9.29019e-174	3.60391	0.309	0.076	2.05648e-169	SEM	Ecrg4
3.16632e-162	1.63465	0.515	0.186	7.00898e-158	SEM	Cd109
2.63909e-158	1.5424	0.782	0.462	5.84189e-154	SEM	Lox
1.88657e-154	1.62669	0.686	0.348	4.1761e-150	SEM	1110008P14Rik
1.32539e-153	1.88464	0.438	0.148	2.93389e-149	SEM	Srpx2
3.19281e-145	1.60126	0.683	0.347	7.0676e-141	SEM	Ank
5.5603e-140	1.97046	0.359	0.111	1.23083e-135	SEM	Ereg
8.48186e-124	1.59601	0.396	0.136	1.87755e-119	SEM	Slc7a2
1.3451e-106	1.68103	0.284	0.087	2.97751e-102	SEM	Rnf152
6.86876e-104	3.06281	0.256	0.077	1.52047e-99	SEM	Comp
1.15951e-97	2.18672	0.251	0.076	2.56669e-93	SEM	Mia
1.03806e-78	2.56623	0.285	0.11	2.29785e-74	SEM	Igfbp2
1.73924e-75	1.72177	0.3	0.114	3.84999e-71	SEM	Cox4i2
5.40389e-71	2.04925	0.856	0.73	1.1962e-66	SEM	Eln
1.27328e-70	1.68752	0.318	0.132	2.81853e-66	SEM	Acan
0	7.43814	0.937	0.042	0	Endothelial	Ptprb
0	9.90124	0.883	0.003	0	Endothelial	Egfl7
0	10.9958	0.859	0.001	0	Endothelial	Cdh5
0	6.12189	0.944	0.149	0	Endothelial	Pecam1
0	4.9316	0.891	0.106	0	Endothelial	Ramp2
0	6.18547	0.763	0.022	0	Endothelial	Tek
0	5.2316	0.768	0.042	0	Endothelial	S1pr1
0	8.94903	0.728	0.006	0	Endothelial	Mmrn2
0	9.41172	0.727	0.006	0	Endothelial	Vwf
0	4.90312	0.786	0.067	0	Endothelial	Cytl1
0	5.8095	0.738	0.019	0	Endothelial	Ctla2a
0	5.52643	0.75	0.039	0	Endothelial	Cd93
0	5.86182	0.753	0.059	0	Endothelial	Esam
0	7.22186	0.698	0.012	0	Endothelial	Ecscr
0	7.42422	0.692	0.01	0	Endothelial	Icam2
0	8.56851	0.689	0.012	0	Endothelial	Bmp6
0	4.33113	0.879	0.217	0	Endothelial	Heg1
0	11.4447	0.647	0.001	0	Endothelial	Tie1
0	4.45279	0.858	0.229	0	Endothelial	Ece1
0	10.2237	0.623	0.001	0	Endothelial	Sox18
0	2.72476	0.8	0.18	0	Endothelial	Ly6e
0	4.99842	0.72	0.102	0	Endothelial	Cgnl1
0	5.01665	0.7	0.082	0	Endothelial	Slc9a3r2
0	4.46988	0.686	0.069	0	Endothelial	Lmo2
0	2.45408	0.741	0.127	0	Endothelial	Srgn
0	10.6488	0.607	0.001	0	Endothelial	Emcn
0	2.67398	0.663	0.063	0	Endothelial	Stab1
0	8.76923	0.602	0.004	0	Endothelial	Nos3
0	9.18674	0.6	0.003	0	Endothelial	Adgrf5
0	3.6021	0.726	0.132	0	Endothelial	Arhgap31
0	5.95299	0.609	0.016	0	Endothelial	Fgd5
0	9.95754	0.589	0.001	0	Endothelial	Myct1
0	6.77119	0.605	0.017	0	Endothelial	Samd12
0	11.2377	0.581	0.001	0	Endothelial	Cldn5
0	9.64731	0.576	0.002	0	Endothelial	Podxl
0	4.43422	0.63	0.064	0	Endothelial	Notch1
0	7.82874	0.569	0.004	0	Endothelial	Bmx
0	3.90564	0.789	0.229	0	Endothelial	Cavin2
0	5.94687	0.595	0.037	0	Endothelial	Slco2a1
0	5.13219	0.59	0.035	0	Endothelial	Clec14a
0	3.87297	0.627	0.083	0	Endothelial	Stxbp6
0	6.25358	0.557	0.015	0	Endothelial	Car8
0	5.71095	0.561	0.024	0	Endothelial	Sema6a
0	4.05952	0.632	0.096	0	Endothelial	F11r
0	3.92451	0.734	0.201	0	Endothelial	Eng
0	7.29579	0.542	0.012	0	Endothelial	Ldb2
0	3.54069	0.822	0.298	0	Endothelial	Epas1
0	2.90172	0.753	0.23	0	Endothelial	Ablim1
0	5.20848	0.564	0.041	0	Endothelial	Tmem158
0	8.00387	0.525	0.006	0	Endothelial	Selp
0	4.43064	0.573	0.055	0	Endothelial	Cbfa2t3
0	8.40731	0.521	0.004	0	Endothelial	Palmd
0	3.52462	0.626	0.116	0	Endothelial	Sfrp1
0	4.69027	0.527	0.02	0	Endothelial	Cd24a
0	4.24084	0.571	0.068	0	Endothelial	Spon1
0	3.53119	0.82	0.32	0	Endothelial	Ptprm
0	10.6794	0.498	0.001	0	Endothelial	Gja5
0	8.40335	0.499	0.002	0	Endothelial	Rasip1
0	5.09028	0.504	0.011	0	Endothelial	St6galnac3
0	3.52494	0.661	0.172	0	Endothelial	Efnb2
0	3.39086	0.655	0.172	0	Endothelial	Tspan7
0	5.39198	0.498	0.015	0	Endothelial	Procr
0	3.27747	0.632	0.149	0	Endothelial	Dock9
0	4.20277	0.575	0.099	0	Endothelial	Plvap
0	9.83166	0.467	0.002	0	Endothelial	Cyyr1
0	4.02811	0.564	0.101	0	Endothelial	Bmp4
0	6.0566	0.475	0.015	0	Endothelial	Enpp6
0	3.22788	0.569	0.114	0	Endothelial	Itpr2
0	3.89074	0.535	0.083	0	Endothelial	Thsd7a
0	4.77968	0.512	0.062	0	Endothelial	Ephx2
0	3.43763	0.595	0.148	0	Endothelial	Plxna2
0	3.30785	0.539	0.094	0	Endothelial	Cracr2b
0	3.77978	0.485	0.04	0	Endothelial	Prkch
0	6.56674	0.448	0.008	0	Endothelial	Gata2
0	4.51827	0.467	0.029	0	Endothelial	Tspan13
0	6.53144	0.445	0.01	0	Endothelial	Shank3
0	3.746	0.52	0.086	0	Endothelial	Jam2
0	2.66105	0.56	0.129	0	Endothelial	Cmip
0	8.24772	0.432	0.002	0	Endothelial	Clec1a
0	7.80637	0.434	0.005	0	Endothelial	Clic5
0	3.12582	0.582	0.154	0	Endothelial	Lrrc8c
0	6.69125	0.433	0.008	0	Endothelial	Rasgrf2
0	7.0629	0.43	0.006	0	Endothelial	Mall
0	5.50686	0.448	0.025	0	Endothelial	Myzap
0	3.48899	0.523	0.101	0	Endothelial	Unc13b
0	8.75333	0.423	0.002	0	Endothelial	Pkhd1l1
0	6.4488	0.431	0.011	0	Endothelial	Cadps2
0	3.82773	0.479	0.062	0	Endothelial	Plxnd1
0	11.2849	0.415	0	0	Endothelial	Sox17
0	5.7991	0.426	0.014	0	Endothelial	Adcy4
0	4.12983	0.462	0.055	0	Endothelial	Ly6c1
0	3.56141	0.521	0.117	0	Endothelial	Calcrl
0	2.56803	0.872	0.475	0	Endothelial	Ppp3ca
0	4.77548	0.432	0.047	0	Endothelial	Gja4
0	6.21058	0.393	0.008	0	Endothelial	Sox7
0	3.07359	0.423	0.038	0	Endothelial	H2-Q7
0	5.3893	0.424	0.045	0	Endothelial	Edn1
0	8.81981	0.377	0.001	0	Endothelial	She
0	9.47252	0.37	0.001	0	Endothelial	Irf6
0	9.62064	0.37	0.001	0	Endothelial	Ccm2l
0	3.92816	0.408	0.04	0	Endothelial	Ptgs1
0	9.97019	0.368	0	0	Endothelial	Arhgef15
0	4.12856	0.412	0.044	0	Endothelial	Rai14
0	3.80919	0.439	0.072	0	Endothelial	Fzd6
0	4.16418	0.388	0.023	0	Endothelial	H2-Q6
0	5.18571	0.377	0.015	0	Endothelial	Myrip
0	2.79641	0.43	0.069	0	Endothelial	Slfn5
0	5.51802	0.366	0.009	0	Endothelial	Afap1l1
0	3.49085	0.377	0.027	0	Endothelial	Gimap6
0	5.41064	0.365	0.015	0	Endothelial	Fam189a2
0	4.35665	0.374	0.027	0	Endothelial	Adh1
0	9.40523	0.348	0.001	0	Endothelial	Gkn3
0	3.82466	0.415	0.071	0	Endothelial	Hyal2
0	5.61883	0.348	0.009	0	Endothelial	Arap3
0	4.82206	0.362	0.026	0	Endothelial	Rassf9
0	7.97316	0.331	0.002	0	Endothelial	Pkn3
0	3.59299	0.386	0.063	0	Endothelial	Epha4
0	7.24402	0.318	0.003	0	Endothelial	Itgb4
0	3.85173	0.34	0.025	0	Endothelial	Klhl6
0	4.73253	0.333	0.02	0	Endothelial	Isl1
0	10.8007	0.307	0	0	Endothelial	Adgrl4
0	4.2681	0.323	0.017	0	Endothelial	Gcnt1
0	6.13866	0.309	0.005	0	Endothelial	Tnfsf10
0	5.26015	0.316	0.013	0	Endothelial	Hspa12b
0	4.87455	0.31	0.011	0	Endothelial	Hhex
0	4.69023	0.322	0.026	0	Endothelial	Kank3
0	3.78805	0.325	0.03	0	Endothelial	Hs3st1
0	3.9722	0.314	0.02	0	Endothelial	Parvb
0	7.002	0.292	0.005	0	Endothelial	Adgrg1
0	5.59374	0.29	0.009	0	Endothelial	Lsr
0	4.27575	0.307	0.028	0	Endothelial	Efna1
0	5.23108	0.28	0.006	0	Endothelial	Tal1
0	9.10622	0.269	0.001	0	Endothelial	Dhh
0	5.81177	0.273	0.006	0	Endothelial	Klk8
0	4.72728	0.278	0.018	0	Endothelial	Afap1l2
0	4.90698	0.279	0.021	0	Endothelial	Acer2
0	3.04805	0.269	0.016	0	Endothelial	Ppp1r16b
0	3.66921	0.264	0.011	0	Endothelial	Gimap1
0	4.45362	0.264	0.014	0	Endothelial	Card10
0	5.23512	0.271	0.024	0	Endothelial	Lrg1
0	3.52568	0.273	0.031	0	Endothelial	Il15
0	4.73925	0.253	0.016	0	Endothelial	Gprc5a
0	4.12357	0.261	0.027	0	Endothelial	Col23a1
0	4.15406	0.25	0.018	0	Endothelial	Exoc3l4
9.73471e-304	3.30993	0.309	0.04	2.15488e-299	Endothelial	Bvht
4.40938e-302	2.76228	0.357	0.053	9.76061e-298	Endothelial	Gngt2
1.32488e-300	2.82472	0.506	0.108	2.93274e-296	Endothelial	Pitpnc1
9.43899e-300	2.61099	0.599	0.148	2.08942e-295	Endothelial	Ly6a
3.5967e-296	3.38056	0.266	0.03	7.96165e-292	Endothelial	Smagp
1.66035e-290	3.04795	0.661	0.219	3.67536e-286	Endothelial	Plxna4
6.82957e-286	2.48074	0.285	0.036	1.51179e-281	Endothelial	Tox
1.05913e-283	2.79749	0.696	0.235	2.34448e-279	Endothelial	Vcam1
5.84264e-282	3.60394	0.485	0.111	1.29333e-277	Endothelial	Etl4
6.37898e-281	2.90874	0.626	0.191	1.41205e-276	Endothelial	Dock4
6.06591e-278	1.84147	0.936	0.795	1.34275e-273	Endothelial	H2-D1
1.50917e-275	2.9965	0.682	0.256	3.3407e-271	Endothelial	Apbb2
2.06823e-273	3.44524	0.37	0.065	4.57824e-269	Endothelial	Ephb4
7.72237e-272	2.83906	0.67	0.247	1.70942e-267	Endothelial	Adam10
2.92181e-270	3.47995	0.447	0.097	6.46773e-266	Endothelial	Sncaip
2.34767e-269	3.62797	0.278	0.037	5.19681e-265	Endothelial	Zfpm1
1.31721e-266	2.8112	0.472	0.106	2.91577e-262	Endothelial	Fzd4
1.70271e-265	2.15129	0.899	0.656	3.76913e-261	Endothelial	H2-K1
6.00351e-265	3.45336	0.302	0.044	1.32894e-260	Endothelial	Tbc1d8
5.28446e-264	3.06351	0.526	0.141	1.16977e-259	Endothelial	Fnbp1l
6.64629e-263	3.07729	0.617	0.21	1.47122e-258	Endothelial	Mrtfb
4.6271e-261	2.98351	0.623	0.213	1.02425e-256	Endothelial	Dennd5b
5.91594e-261	2.91974	0.732	0.346	1.30955e-256	Endothelial	Ehd4
1.06362e-260	3.90162	0.273	0.037	2.35442e-256	Endothelial	Sox13
9.96587e-252	2.38485	0.66	0.224	2.20604e-247	Endothelial	Clec2d
3.42263e-250	2.50533	0.626	0.203	7.57634e-246	Endothelial	Sgms1
3.33517e-247	2.99908	0.554	0.167	7.38274e-243	Endothelial	Ptpn14
1.89272e-245	1.71848	0.948	0.763	4.18973e-241	Endothelial	Sptbn1
5.35698e-244	2.61778	0.386	0.074	1.18582e-239	Endothelial	Sp100
9.72386e-244	3.7617	0.26	0.035	2.15247e-239	Endothelial	Ahsg
2.94296e-241	2.55884	0.847	0.635	6.51454e-237	Endothelial	Clu
3.17446e-241	2.96894	0.646	0.236	7.02699e-237	Endothelial	Nrp1
3.0941e-233	2.98084	0.257	0.035	6.8491e-229	Endothelial	Sema6d
5.55871e-231	1.67108	0.664	0.21	1.23048e-226	Endothelial	Cd34
9.29055e-229	2.72619	0.381	0.076	2.05656e-224	Endothelial	Zfp521
1.16204e-227	2.0914	0.935	0.819	2.57229e-223	Endothelial	Tm4sf1
9.04914e-227	2.67712	0.583	0.195	2.00312e-222	Endothelial	Elk3
6.42347e-226	2.79147	0.573	0.19	1.4219e-221	Endothelial	Jcad
4.03116e-223	2.63832	0.344	0.064	8.92337e-219	Endothelial	Bace2
6.08828e-223	2.28967	0.744	0.342	1.3477e-218	Endothelial	Elmo1
8.06474e-223	2.64083	0.614	0.231	1.78521e-218	Endothelial	Flnb
1.5011e-222	2.56678	0.607	0.201	3.32283e-218	Endothelial	Fli1
3.00113e-219	2.78901	0.298	0.05	6.64331e-215	Endothelial	Fam43a
3.80584e-218	2.81255	0.538	0.167	8.42461e-214	Endothelial	Stard13
7.28308e-218	2.27461	0.436	0.101	1.61218e-213	Endothelial	H2-Q4
1.30244e-212	1.93907	0.552	0.16	2.88308e-208	Endothelial	Ackr3
2.53878e-212	3.07476	0.367	0.079	5.61984e-208	Endothelial	Aph1b
6.01297e-212	1.73397	0.576	0.17	1.33103e-207	Endothelial	Fbln2
1.08036e-210	2.59108	0.58	0.207	2.39149e-206	Endothelial	Erg
1.73817e-210	2.66419	0.603	0.228	3.84761e-206	Endothelial	Arhgap29
3.30568e-209	2.55815	0.437	0.114	7.31745e-205	Endothelial	Fabp5
2.84164e-208	2.13884	0.583	0.185	6.29026e-204	Endothelial	Cpne8
2.37203e-207	2.96418	0.505	0.158	5.25073e-203	Endothelial	Tspan6
7.88807e-206	3.24253	0.314	0.06	1.7461e-201	Endothelial	Pdia5
4.15216e-204	2.43044	0.598	0.226	9.19122e-200	Endothelial	Cpd
1.92746e-202	2.67447	0.672	0.306	4.26663e-198	Endothelial	Gng11
2.82275e-202	3.02014	0.533	0.186	6.24844e-198	Endothelial	Cemip2
6.34744e-200	2.55016	0.663	0.294	1.40507e-195	Endothelial	Rapgef5
4.72643e-199	2.97244	0.433	0.115	1.04624e-194	Endothelial	Ppp1r13b
5.99355e-199	3.12317	0.706	0.371	1.32673e-194	Endothelial	Ptprj
2.73589e-197	2.14917	0.738	0.421	6.05617e-193	Endothelial	Rab11a
1.67228e-196	3.24561	0.373	0.088	3.70175e-192	Endothelial	Amigo2
3.32454e-196	1.82135	0.743	0.346	7.35919e-192	Endothelial	Fxyd5
4.56925e-195	1.89114	0.48	0.13	1.01145e-190	Endothelial	Kctd12
5.17925e-195	3.22567	0.253	0.041	1.14648e-190	Endothelial	Fam174b
1.48808e-194	2.59168	0.391	0.093	3.29402e-190	Endothelial	Arrb1
1.00212e-191	1.73701	0.883	0.591	2.2183e-187	Endothelial	Cav1
2.28971e-191	2.34779	0.425	0.109	5.06851e-187	Endothelial	St3gal1
1.61656e-190	2.78315	0.556	0.206	3.57841e-186	Endothelial	Tspan9
3.64301e-186	2.72308	0.276	0.05	8.06417e-182	Endothelial	Frrs1
4.83406e-186	2.6734	0.321	0.065	1.07007e-181	Endothelial	Tspan14
6.5499e-182	3.50627	0.276	0.052	1.44989e-177	Endothelial	Ica1
9.18891e-181	2.14551	0.705	0.384	2.03406e-176	Endothelial	Tmod3
5.10149e-178	1.99173	0.769	0.48	1.12927e-173	Endothelial	Gnaq
8.7282e-178	1.62661	0.317	0.063	1.93207e-173	Endothelial	Tnfaip2
2.81526e-177	2.29808	0.734	0.444	6.23186e-173	Endothelial	Cd2ap
8.12363e-177	2.49608	0.541	0.198	1.79825e-172	Endothelial	Sptlc2
6.76891e-176	3.29384	0.267	0.049	1.49837e-171	Endothelial	Arhgef28
4.0117e-175	1.87511	0.578	0.192	8.8803e-171	Endothelial	Tshz2
1.01138e-174	2.19399	0.599	0.247	2.2388e-170	Endothelial	Lima1
2.98585e-172	2.1701	0.425	0.115	6.60947e-168	Endothelial	Fyn
8.39242e-169	2.10413	0.515	0.166	1.85775e-164	Endothelial	Icam1
9.0892e-169	2.75941	0.54	0.218	2.01199e-164	Endothelial	Nuak1
8.70733e-168	3.06747	0.391	0.109	1.92746e-163	Endothelial	Atp2a3
2.51097e-167	2.44523	0.555	0.223	5.55829e-163	Endothelial	Adipor2
1.86705e-166	2.27976	0.777	0.531	4.13289e-162	Endothelial	Cdh13
7.06866e-165	4.01726	0.546	0.241	1.56472e-160	Endothelial	Aqp1
5.14434e-164	1.99506	0.337	0.076	1.13875e-159	Endothelial	Sh3bp5
5.70188e-164	1.95012	0.727	0.442	1.26217e-159	Endothelial	Tulp4
2.97843e-163	2.05597	0.741	0.438	6.59305e-159	Endothelial	Tinagl1
5.41511e-161	1.54909	0.655	0.27	1.19869e-156	Endothelial	Tmem176b
6.46498e-160	3.22058	0.257	0.05	1.43109e-155	Endothelial	Pdgfb
2.26906e-159	2.20862	0.483	0.161	5.0228e-155	Endothelial	St3gal4
2.60888e-159	2.14543	0.288	0.06	5.77502e-155	Endothelial	Ptk2b
6.20359e-158	2.44306	0.583	0.256	1.37323e-153	Endothelial	Ptk2
8.3208e-157	2.07733	0.345	0.083	1.84189e-152	Endothelial	Cd55
2.23594e-154	1.95302	0.476	0.155	4.94948e-150	Endothelial	Fmo1
1.66872e-153	2.16649	0.739	0.489	3.69389e-149	Endothelial	Il6st
9.86699e-152	3.70231	0.441	0.151	2.18416e-147	Endothelial	Flt1
2.00075e-151	2.13985	0.646	0.339	4.42886e-147	Endothelial	4931406P16Rik
4.00019e-151	3.32761	0.274	0.059	8.85481e-147	Endothelial	Plekhg1
7.51932e-151	2.67731	0.259	0.052	1.66448e-146	Endothelial	Ass1
2.32169e-147	2.33799	0.497	0.186	5.13929e-143	Endothelial	Dock6
2.75416e-147	1.60786	0.61	0.245	6.0966e-143	Endothelial	Slc43a3
3.97891e-147	3.06522	0.377	0.112	8.80772e-143	Endothelial	Csgalnact1
1.04073e-146	2.49363	0.582	0.262	2.30375e-142	Endothelial	Fbxl7
5.84054e-146	2.76605	0.445	0.152	1.29286e-141	Endothelial	Tanc1
1.21549e-145	2.25084	0.62	0.319	2.69061e-141	Endothelial	Itprid2
1.72983e-143	2.69469	0.436	0.148	3.82916e-139	Endothelial	Rps6ka5
4.55446e-139	1.60783	0.778	0.584	1.00817e-134	Endothelial	Bmpr2
9.35981e-138	1.92785	0.362	0.097	2.07189e-133	Endothelial	Lgals9
9.94488e-138	2.90661	0.285	0.068	2.2014e-133	Endothelial	Rab27a
1.55823e-137	2.52972	0.666	0.437	3.44929e-133	Endothelial	Fam3c
3.87806e-137	1.81246	0.285	0.064	8.58448e-133	Endothelial	Mctp1
1.02388e-135	2.30138	0.538	0.229	2.26646e-131	Endothelial	Afdn
4.89533e-135	2.04966	0.746	0.554	1.08363e-130	Endothelial	Ctsh
8.91814e-135	2.07546	0.482	0.176	1.97412e-130	Endothelial	Plscr4
1.45695e-134	2.37846	0.553	0.247	3.22509e-130	Endothelial	Sema3f
2.74815e-133	2.00808	0.771	0.614	6.08331e-129	Endothelial	Mecom
3.6331e-133	2.2298	0.431	0.145	8.04222e-129	Endothelial	March3
1.79195e-131	2.43048	0.662	0.439	3.96665e-127	Endothelial	Gxylt2
6.89898e-131	1.9465	0.647	0.371	1.52716e-126	Endothelial	Ace
2.82246e-130	1.6682	0.762	0.535	6.24779e-126	Endothelial	Crim1
5.28725e-129	1.79597	0.674	0.417	1.17039e-124	Endothelial	S100a16
6.02844e-129	1.63748	0.605	0.27	1.33445e-124	Endothelial	Cp
8.33302e-129	2.57041	0.424	0.149	1.8446e-124	Endothelial	Yes1
9.74277e-128	2.20689	0.502	0.211	2.15666e-123	Endothelial	Rfk
1.40604e-126	2.20555	0.441	0.16	3.1124e-122	Endothelial	Map3k1
5.17828e-125	1.8514	0.649	0.362	1.14626e-120	Endothelial	Bst2
1.03849e-124	2.04281	0.467	0.178	2.29881e-120	Endothelial	Hdac7
1.64076e-123	2.04872	0.488	0.196	3.63199e-119	Endothelial	Mindy2
1.67004e-123	3.01196	0.319	0.093	3.6968e-119	Endothelial	Bpgm
9.8283e-123	1.95586	0.262	0.061	2.17559e-118	Endothelial	Ptger4
1.20125e-122	2.27312	0.501	0.217	2.65909e-118	Endothelial	Cdk17
5.20848e-122	2.2763	0.337	0.096	1.15295e-117	Endothelial	Trerf1
9.80218e-120	1.98983	0.596	0.291	2.16981e-115	Endothelial	Kcnt2
2.84914e-119	2.03498	0.538	0.245	6.30686e-115	Endothelial	Ndrg1
5.44911e-119	2.24761	0.332	0.097	1.20622e-114	Endothelial	Grasp
2.53042e-118	2.26178	0.344	0.102	5.60134e-114	Endothelial	Thbs1
1.98553e-116	2.37408	0.642	0.38	4.39516e-112	Endothelial	Arl15
3.20756e-116	1.91863	0.698	0.471	7.10025e-112	Endothelial	Tmtc2
1.01048e-114	2.41098	0.295	0.082	2.23679e-110	Endothelial	Dop1b
4.31495e-114	2.25488	0.354	0.113	9.55158e-110	Endothelial	9930111J21Rik2
4.58235e-111	2.31731	0.531	0.255	1.01435e-106	Endothelial	Prex2
1.7715e-109	2.07441	0.515	0.244	3.92139e-105	Endothelial	Acvr1
2.70435e-107	2.42354	0.353	0.119	5.98635e-103	Endothelial	Shroom4
6.14827e-107	1.56892	0.703	0.514	1.36098e-102	Endothelial	Wwtr1
3.85147e-106	1.97043	0.525	0.252	8.5256e-102	Endothelial	Nck1
8.13483e-104	2.54886	0.564	0.29	1.80073e-99	Endothelial	Ptprg
8.28596e-104	2.02585	0.523	0.26	1.83418e-99	Endothelial	F2r
9.14312e-104	1.67465	0.469	0.188	2.02392e-99	Endothelial	Tcn2
2.01248e-103	1.89744	0.437	0.175	4.45482e-99	Endothelial	Wbp1l
5.14513e-102	1.66809	0.505	0.226	1.13893e-97	Endothelial	Cyp1b1
7.2313e-102	1.66986	0.499	0.215	1.60072e-97	Endothelial	Thbd
3.45432e-101	2.73691	0.293	0.088	7.64648e-97	Endothelial	Btbd3
9.97512e-100	1.82223	0.29	0.082	2.20809e-95	Endothelial	Eps8
2.1353e-99	1.93391	0.347	0.115	4.7267e-95	Endothelial	Lrmda
1.0062e-98	2.18734	0.341	0.116	2.22732e-94	Endothelial	Piezo1
6.39858e-98	2.03277	0.699	0.594	1.41639e-93	Endothelial	Efna5
1.06952e-97	2.42645	0.289	0.087	2.3675e-93	Endothelial	Ggta1
2.39599e-96	2.41048	0.334	0.115	5.30375e-92	Endothelial	Cdc14a
2.78725e-95	2.41659	0.324	0.109	6.16986e-91	Endothelial	Enpp4
9.155e-94	2.09974	0.413	0.169	2.02655e-89	Endothelial	Acvrl1
5.56886e-93	2.17091	0.511	0.261	1.23272e-88	Endothelial	Ptprk
6.61696e-93	1.56698	0.336	0.11	1.46473e-88	Endothelial	Pde3b
9.81513e-92	1.80268	0.587	0.34	2.17268e-87	Endothelial	Tjp1
4.51156e-91	1.98381	0.463	0.213	9.98678e-87	Endothelial	Ntn4
5.59111e-90	2.00752	0.503	0.253	1.23765e-85	Endothelial	Adam15
2.06259e-89	1.81306	0.616	0.374	4.56575e-85	Endothelial	Nxn
2.37573e-89	1.84743	0.617	0.382	5.25892e-85	Endothelial	Ghr
2.09226e-87	2.35233	0.353	0.135	4.63143e-83	Endothelial	1010001N08Rik
4.59954e-87	1.83614	0.402	0.166	1.01815e-82	Endothelial	Lasp1
1.43251e-86	1.74503	0.61	0.377	3.171e-82	Endothelial	Pakap.1
1.3212e-85	1.61503	0.472	0.211	2.92461e-81	Endothelial	H2-T23
2.46871e-85	1.95301	0.49	0.248	5.46475e-81	Endothelial	Numb
1.57322e-83	2.26039	0.29	0.098	3.48249e-79	Endothelial	Fam171a1
4.23315e-83	1.65716	0.505	0.256	9.37051e-79	Endothelial	Scd2
7.25191e-82	1.5684	0.647	0.444	1.60528e-77	Endothelial	Tgm2
1.48269e-81	1.60361	0.621	0.411	3.28209e-77	Endothelial	Cav2
1.06142e-80	1.58555	0.516	0.281	2.34955e-76	Endothelial	Phactr2
1.30549e-80	1.80009	0.372	0.151	2.88984e-76	Endothelial	Orai1
1.52615e-80	1.99921	0.359	0.142	3.3783e-76	Endothelial	Arhgef3
2.08982e-80	1.90748	0.519	0.291	4.62603e-76	Endothelial	Ralgapa2
2.9113e-79	1.59099	0.597	0.382	6.44446e-75	Endothelial	Trim47
4.95099e-79	2.01729	0.278	0.092	1.09595e-74	Endothelial	Tmod2
1.06853e-78	1.61895	0.511	0.275	2.36529e-74	Endothelial	Lifr
5.77975e-78	1.90619	0.328	0.12	1.27941e-73	Endothelial	Pxn
7.83812e-78	1.76386	0.251	0.077	1.73505e-73	Endothelial	Cd82
1.85669e-77	1.88165	0.33	0.124	4.10997e-73	Endothelial	Plk2
1.19345e-76	2.10425	0.563	0.345	2.64182e-72	Endothelial	Magi1
1.85796e-76	2.4871	0.303	0.113	4.11279e-72	Endothelial	Sox4
3.14608e-76	1.9349	0.35	0.139	6.96417e-72	Endothelial	Trim2
3.94592e-76	1.60124	0.593	0.38	8.73469e-72	Endothelial	Atrnl1
5.58933e-75	2.41544	0.258	0.083	1.23725e-70	Endothelial	Iigp1
1.9148e-73	1.5053	0.605	0.393	4.23861e-69	Endothelial	Grk5
8.51659e-73	1.91121	0.469	0.251	1.88523e-68	Endothelial	Rgs3
7.19834e-72	2.64126	0.28	0.1	1.59343e-67	Endothelial	Abcg2
2.38835e-71	1.90022	0.351	0.148	5.28685e-67	Endothelial	Lrp5
4.07529e-70	2.33265	0.29	0.109	9.02106e-66	Endothelial	Exoc6
7.72665e-70	1.74624	0.549	0.34	1.71037e-65	Endothelial	Tanc2
2.15633e-69	1.54061	0.491	0.266	4.77326e-65	Endothelial	Phlda3
2.23354e-69	1.80381	0.257	0.085	4.94416e-65	Endothelial	Tfpi
2.27288e-69	1.52055	0.547	0.332	5.03126e-65	Endothelial	Sulf2
2.54729e-68	2.04112	0.302	0.115	5.63868e-64	Endothelial	Pear1
2.84542e-68	1.81468	0.39	0.181	6.29862e-64	Endothelial	Stim2
4.22139e-68	1.94707	0.361	0.159	9.34448e-64	Endothelial	Stxbp5
8.25571e-68	1.56534	0.402	0.188	1.82748e-63	Endothelial	Lysmd2
1.28613e-67	2.21042	0.257	0.09	2.84698e-63	Endothelial	Ipo11
1.30789e-65	1.88066	0.312	0.125	2.89513e-61	Endothelial	Atp11a
3.46694e-65	1.71842	0.355	0.154	7.67441e-61	Endothelial	Plaat3
8.29658e-65	1.72815	0.437	0.227	1.83653e-60	Endothelial	Nhsl2
1.90377e-64	1.82711	0.503	0.309	4.21418e-60	Endothelial	Mgst3
2.95912e-64	1.6254	0.551	0.356	6.55031e-60	Endothelial	Ccny
1.74285e-63	1.77798	0.456	0.248	3.85797e-59	Endothelial	Oxr1
4.55726e-63	1.68496	0.278	0.102	1.00879e-58	Endothelial	Rnf213
6.44851e-63	1.50711	0.548	0.351	1.42744e-58	Endothelial	Klf3
7.00661e-63	1.72637	0.416	0.209	1.55098e-58	Endothelial	Zfp608
1.91291e-62	1.85545	0.351	0.158	4.23441e-58	Endothelial	Ets1
2.44043e-62	1.8327	0.292	0.114	5.40213e-58	Endothelial	Vegfa
7.77788e-61	2.0474	0.329	0.144	1.72171e-56	Endothelial	Ugcg
1.00082e-60	1.81131	0.259	0.094	2.21541e-56	Endothelial	Esr1
1.29568e-59	1.91192	0.461	0.268	2.86811e-55	Endothelial	Smad6
9.31521e-58	1.56835	0.598	0.439	2.06201e-53	Endothelial	Plec
1.19045e-57	1.67191	0.36	0.165	2.63517e-53	Endothelial	Dram2
1.30245e-57	1.53824	0.585	0.419	2.88311e-53	Endothelial	Pgm5
2.45072e-57	1.74384	0.384	0.193	5.42492e-53	Endothelial	Cmas
8.76512e-57	1.55444	0.415	0.211	1.94025e-52	Endothelial	Sept11
3.09783e-56	1.56604	0.557	0.386	6.85735e-52	Endothelial	Tcf7l1
1.09807e-55	1.69204	0.34	0.155	2.43069e-51	Endothelial	Pacs1
2.15134e-54	1.53694	0.634	0.492	4.76221e-50	Endothelial	Plpp1
3.50067e-52	1.70438	0.438	0.254	7.74907e-48	Endothelial	Dab2ip
1.26649e-51	1.55422	0.472	0.285	2.8035e-47	Endothelial	Dock1
5.53453e-51	1.80478	0.28	0.12	1.22512e-46	Endothelial	Nt5c3
1.00393e-50	1.7081	0.292	0.127	2.2223e-46	Endothelial	Slc4a4
1.86812e-50	1.80973	0.268	0.112	4.13528e-46	Endothelial	Nck2
2.19468e-50	1.88654	0.301	0.134	4.85815e-46	Endothelial	Elovl5
2.52694e-50	1.79515	0.328	0.155	5.59364e-46	Endothelial	Ccnyl1
2.59717e-50	1.71586	0.289	0.128	5.74909e-46	Endothelial	Tmem238
1.03804e-49	2.33343	0.34	0.17	2.29781e-45	Endothelial	Cep85l
5.66083e-47	1.84483	0.282	0.126	1.25308e-42	Endothelial	Mamld1
6.00137e-47	1.80578	0.289	0.131	1.32846e-42	Endothelial	Pqlc1
7.37002e-47	1.86214	0.258	0.109	1.63143e-42	Endothelial	Ctnnal1
1.87432e-46	1.52177	0.265	0.111	4.149e-42	Endothelial	Gria3
2.34569e-46	1.52726	0.611	0.465	5.19241e-42	Endothelial	Cdk8
5.83468e-46	1.72239	0.318	0.153	1.29157e-41	Endothelial	Klhl5
8.42605e-46	1.65262	0.354	0.181	1.86519e-41	Endothelial	Mfsd6
9.41792e-46	2.04186	0.283	0.126	2.08475e-41	Endothelial	Mcc
1.14705e-45	2.05619	0.262	0.116	2.5391e-41	Endothelial	Parm1
1.48585e-45	1.92076	0.262	0.114	3.28908e-41	Endothelial	Taok2
2.50482e-45	2.03699	0.332	0.17	5.54466e-41	Endothelial	Map4k3
5.4519e-45	1.91968	0.315	0.153	1.20683e-40	Endothelial	Myo6
5.66385e-45	1.61425	0.252	0.105	1.25375e-40	Endothelial	Rgl2
3.15122e-44	1.6348	0.383	0.214	6.97553e-40	Endothelial	Tmem184b
3.62943e-44	1.59635	0.397	0.229	8.03411e-40	Endothelial	Cdc42bpb
4.10086e-44	1.65062	0.28	0.127	9.07767e-40	Endothelial	Mindy1
8.8545e-44	1.92615	0.267	0.12	1.96003e-39	Endothelial	Glce
2.6816e-42	1.55797	0.285	0.132	5.93598e-38	Endothelial	Psen2
1.27978e-41	1.76604	0.251	0.111	2.83293e-37	Endothelial	Lrrc32
1.6235e-41	1.63717	0.324	0.165	3.59378e-37	Endothelial	Tmem140
2.07737e-41	1.75339	0.322	0.17	4.59848e-37	Endothelial	St3gal5
6.70882e-41	1.63772	0.34	0.183	1.48507e-36	Endothelial	Spata6
7.11196e-41	1.6004	0.339	0.18	1.5743e-36	Endothelial	Trim24
1.29354e-40	1.63617	0.359	0.198	2.86338e-36	Endothelial	Bcr
9.61456e-40	1.70075	0.357	0.197	2.12828e-35	Endothelial	Tjp2
1.16206e-39	1.70403	0.314	0.163	2.57234e-35	Endothelial	Ypel2
8.15882e-39	2.3102	0.345	0.196	1.80604e-34	Endothelial	Stox2
1.25754e-38	1.65085	0.382	0.23	2.7837e-34	Endothelial	Hey2
9.35549e-38	1.63462	0.304	0.153	2.07093e-33	Endothelial	Prkce
1.66144e-37	1.6313	0.302	0.153	3.67776e-33	Endothelial	Ripor1
5.91279e-37	1.81044	0.304	0.157	1.30886e-32	Endothelial	Pik3r3
4.46533e-35	1.65328	0.274	0.136	9.88446e-31	Endothelial	Lpcat3
2.66714e-34	1.64169	0.287	0.151	5.90398e-30	Endothelial	Dgcr2
1.75519e-32	1.58804	0.339	0.2	3.88529e-28	Endothelial	Arhgap23
3.42413e-30	1.6835	0.369	0.235	7.57965e-26	Endothelial	Nr3c2
6.04147e-29	1.82739	0.387	0.255	1.33734e-24	Endothelial	Plat
6.71013e-29	1.64447	0.4	0.27	1.48535e-24	Endothelial	Jup
6.64021e-27	1.72876	0.302	0.178	1.46988e-22	Endothelial	Rapgef1
7.30308e-27	1.65144	0.252	0.134	1.61661e-22	Endothelial	Ctnnbip1
2.22605e-26	1.50621	0.269	0.148	4.92758e-22	Endothelial	Myo18a
2.03701e-25	1.5276	0.37	0.247	4.50913e-21	Endothelial	Twist1
4.93456e-25	1.64016	0.26	0.145	1.09231e-20	Endothelial	Agrn
6.34088e-24	1.66632	0.292	0.179	1.40362e-19	Endothelial	Apba1
9.61394e-20	3.75154	0.508	0.487	2.12814e-15	Endothelial	Fabp4
3.05879e-08	1.87476	0.28	0.224	0.000677093	Endothelial	Kitl
4.95374e-05	1.52752	0.26	0.388	1	Endothelial	Mgll

## Sheet: LCMV_12wk_Leuko_Recluster
p_val	avg_log2FC	pct.1	pct.2	p_val_adj	cluster	gene
0	6.30734	0.586	0.009	0	Monocytes	Chil3
5.64097e-274	5.51709	0.655	0.02	1.24869e-269	Monocytes	F10
2.89825e-169	4.76989	0.474	0.018	6.41557e-165	Monocytes	Hp
2.60954e-130	4.23036	0.509	0.032	5.77648e-126	Monocytes	Thbs1
1.08071e-116	4.42636	0.75	0.094	2.39226e-112	Monocytes	Apoc2
2.56393e-108	3.45415	0.897	0.166	5.67551e-104	Monocytes	Gsr
1.01474e-97	3.30237	0.517	0.047	2.24623e-93	Monocytes	Sirpb1c
7.36183e-94	3.11293	0.388	0.026	1.62961e-89	Monocytes	Gm5150
1.24721e-81	4.30804	0.431	0.04	2.76083e-77	Monocytes	Gpr141
7.50685e-77	3.06915	0.905	0.24	1.66172e-72	Monocytes	Gngt2
3.87444e-71	3.3266	0.422	0.044	8.57647e-67	Monocytes	Sgms2
4.701e-71	4.36252	0.379	0.036	1.04061e-66	Monocytes	Ace
5.55443e-70	2.40415	0.948	0.321	1.22953e-65	Monocytes	Msrb1
2.63559e-66	4.18983	0.405	0.044	5.83414e-62	Monocytes	Zfyve9
4.14381e-66	3.20042	0.578	0.094	9.17273e-62	Monocytes	Fgr
2.58055e-65	3.9156	0.543	0.084	5.7123e-61	Monocytes	Plac8
3.06544e-58	3.56836	0.302	0.026	6.78567e-54	Monocytes	Ear2
1.50208e-56	3.14361	0.595	0.12	3.32501e-52	Monocytes	Tgm2
3.42642e-55	2.4846	0.466	0.068	7.58473e-51	Monocytes	Slc7a11
8.82753e-55	4.49289	0.276	0.024	1.95406e-50	Monocytes	Adgre4
5.40144e-54	1.93924	0.345	0.038	1.19566e-49	Monocytes	Slpi
1.34776e-50	3.24928	0.414	0.059	2.98339e-46	Monocytes	Tmem51
1.19538e-49	2.12811	0.802	0.237	2.6461e-45	Monocytes	Plaur
2.62443e-48	2.38345	0.879	0.347	5.80944e-44	Monocytes	Lst1
5.99466e-48	2.2445	0.983	0.532	1.32698e-43	Monocytes	Lgals3
2.37918e-47	2.67363	0.302	0.033	5.26656e-43	Monocytes	C3
3.11732e-47	3.50732	0.259	0.024	6.90049e-43	Monocytes	Mefv
1.06804e-46	2.24148	0.647	0.152	2.36421e-42	Monocytes	Napsa
2.76925e-46	3.17609	0.56	0.122	6.13002e-42	Monocytes	Clec4e
3.31305e-45	2.4583	0.362	0.05	7.33376e-41	Monocytes	Cd300lf
1.09937e-44	1.86172	0.948	0.469	2.43356e-40	Monocytes	Mpeg1
1.54286e-43	3.11983	0.25	0.024	3.41528e-39	Monocytes	Arg2
5.75853e-43	1.88175	0.897	0.373	1.27471e-38	Monocytes	Cd300a
2.40562e-41	2.09118	0.733	0.233	5.32508e-37	Monocytes	Xylt1
1.33924e-39	3.13153	0.422	0.082	2.96454e-35	Monocytes	Klra2
6.5985e-39	3.58496	0.276	0.034	1.46064e-34	Monocytes	Gpr35
9.93954e-39	3.55159	0.353	0.058	2.20022e-34	Monocytes	Ifitm6
1.57659e-38	2.59779	0.5	0.109	3.48993e-34	Monocytes	Abi3
1.48059e-37	2.14164	0.293	0.039	3.27744e-33	Monocytes	Sirpb1b
1.9893e-37	2.63206	0.25	0.029	4.40352e-33	Monocytes	Mcemp1
6.0076e-37	2.15731	0.5	0.113	1.32984e-32	Monocytes	Gcnt2
1.09234e-36	2.18967	0.276	0.035	2.41801e-32	Monocytes	Pygl
3.59889e-36	3.85508	0.345	0.059	7.9665e-32	Monocytes	Plcb1
5.83768e-36	2.09564	0.819	0.337	1.29223e-31	Monocytes	Myo1f
1.48024e-34	3.33144	0.293	0.044	3.27665e-30	Monocytes	Gpnmb
2.9342e-34	1.75613	0.655	0.197	6.49515e-30	Monocytes	Plbd1
5.97273e-34	2.89214	0.353	0.064	1.32212e-29	Monocytes	Ms4a4c
2.63417e-33	2.75366	0.509	0.131	5.831e-29	Monocytes	Itgal
4.83602e-33	2.27577	0.776	0.342	1.0705e-28	Monocytes	Rnh1
8.73461e-33	2.60952	0.888	0.513	1.93349e-28	Monocytes	Prdx5
1.09152e-32	3.30075	0.379	0.077	2.41619e-28	Monocytes	Pparg
3.75522e-32	2.90399	0.267	0.038	8.31255e-28	Monocytes	Nr1h3
4.01623e-32	1.58901	1	0.757	8.89034e-28	Monocytes	Cebpb
4.66022e-32	2.51177	0.578	0.173	1.03159e-27	Monocytes	Havcr2
6.2834e-32	2.46024	0.491	0.127	1.39089e-27	Monocytes	Morrbid
2.00368e-31	2.0768	0.638	0.211	4.43535e-27	Monocytes	Rnf149
3.53195e-31	1.79632	0.716	0.269	7.81833e-27	Monocytes	Smpdl3a
3.67274e-31	2.15582	0.466	0.112	8.12998e-27	Monocytes	Eepd1
4.93453e-31	3.43466	0.44	0.108	1.09231e-26	Monocytes	Fabp5
5.47156e-31	2.81825	0.345	0.065	1.21118e-26	Monocytes	Fabp4
1.41354e-30	2.06117	0.724	0.285	3.12902e-26	Monocytes	Abcg1
7.59191e-30	2.02423	0.603	0.194	1.68054e-25	Monocytes	Emilin2
8.13517e-30	1.54211	0.931	0.61	1.8008e-25	Monocytes	Plin2
1.77822e-29	1.92244	0.552	0.162	3.93627e-25	Monocytes	Csf2rb
2.51643e-29	1.55194	0.845	0.382	5.57036e-25	Monocytes	Alcam
7.33904e-29	2.29865	0.448	0.112	1.62457e-24	Monocytes	Cd274
2.82785e-28	2.11199	0.56	0.174	6.25972e-24	Monocytes	Igsf6
8.44017e-28	2.48372	0.336	0.067	1.86832e-23	Monocytes	Zbp1
2.09098e-27	1.71523	0.707	0.271	4.62859e-23	Monocytes	Hck
2.75097e-27	1.58286	0.836	0.403	6.08954e-23	Monocytes	Cd300c2
4.79655e-27	5.03592	0.25	0.041	1.06176e-22	Monocytes	Vcan
4.83994e-27	1.93488	0.543	0.167	1.07137e-22	Monocytes	Cyp4f18
9.73685e-27	1.52251	0.914	0.611	2.15535e-22	Monocytes	Lyn
1.86907e-26	2.46255	0.431	0.114	4.13737e-22	Monocytes	Tmem38b
3.70978e-26	2.10719	0.379	0.086	8.21197e-22	Monocytes	Gm21188
5.8584e-26	1.69362	0.767	0.361	1.29682e-21	Monocytes	Lrmda
2.94687e-25	2.12691	0.681	0.286	6.52319e-21	Monocytes	Sgk1
3.50092e-25	1.70133	0.741	0.341	7.74964e-21	Monocytes	Clec4a3
1.00261e-24	2.39193	0.319	0.068	2.21937e-20	Monocytes	Tusc1
2.06195e-24	2.73075	0.276	0.053	4.56432e-20	Monocytes	Cd244a
1.19659e-23	2.2083	0.379	0.094	2.64877e-19	Monocytes	Runx2
2.11481e-23	1.59324	0.793	0.407	4.68135e-19	Monocytes	Itgb2
4.12907e-23	2.25805	0.431	0.118	9.1401e-19	Monocytes	Ms4a4a
4.33877e-23	1.80396	0.638	0.26	9.6043e-19	Monocytes	Slc11a1
1.45354e-22	2.17812	0.543	0.202	3.21755e-18	Monocytes	Fam49a
1.55352e-22	2.26324	0.379	0.101	3.43886e-18	Monocytes	Gk
1.57778e-22	1.92503	0.853	0.62	3.49258e-18	Monocytes	Cstb
3.1553e-22	2.09972	0.431	0.125	6.98457e-18	Monocytes	Fcgr4
4.08767e-22	2.18092	0.483	0.158	9.04846e-18	Monocytes	Kmt5a
8.82849e-22	2.11963	0.379	0.101	1.95427e-17	Monocytes	Adssl1
1.79262e-21	1.74335	0.698	0.333	3.96814e-17	Monocytes	Cytip
2.74104e-21	1.8452	0.543	0.204	6.06757e-17	Monocytes	Cers6
5.97728e-21	1.68914	0.741	0.391	1.32313e-16	Monocytes	Aprt
6.82405e-21	2.10641	0.267	0.055	1.51057e-16	Monocytes	Nod1
3.34713e-20	2.17631	0.448	0.151	7.4092e-16	Monocytes	Agpat4
4.60005e-20	1.51852	0.716	0.343	1.01827e-15	Monocytes	Adgre5
4.85574e-20	2.26493	0.319	0.08	1.07487e-15	Monocytes	2310022A10Rik
5.82237e-20	2.09861	0.474	0.167	1.28884e-15	Monocytes	Arhgap24
3.85351e-19	1.57067	0.612	0.259	8.53013e-15	Monocytes	Gda
5.58161e-19	1.84523	0.336	0.089	1.23555e-14	Monocytes	Ldlrap1
1.9049e-18	1.56073	0.517	0.194	4.21668e-14	Monocytes	Ric1
4.37513e-18	1.61051	0.724	0.417	9.68478e-14	Monocytes	Esd
5.13381e-18	1.52437	0.638	0.271	1.13642e-13	Monocytes	Malt1
9.04683e-18	1.54271	0.586	0.25	2.00261e-13	Monocytes	Abr
1.02325e-17	2.18659	0.276	0.068	2.26507e-13	Monocytes	Atg4c
2.0709e-17	1.59097	0.586	0.261	4.58414e-13	Monocytes	Fnip2
3.68139e-17	2.01413	0.397	0.133	8.14913e-13	Monocytes	A930007I19Rik
9.21522e-17	1.56746	0.457	0.17	2.03988e-12	Monocytes	Nfil3
1.12066e-16	2.40449	0.276	0.069	2.4807e-12	Monocytes	Hgf
2.01242e-16	2.24852	0.319	0.094	4.4547e-12	Monocytes	Dock5
2.3173e-16	1.92021	0.371	0.119	5.12958e-12	Monocytes	Naip2
2.4638e-16	1.57867	0.466	0.178	5.45387e-12	Monocytes	AB124611
3.49549e-16	2.74475	0.328	0.098	7.73762e-12	Monocytes	Il1rn
3.81423e-16	1.60816	0.543	0.228	8.44318e-12	Monocytes	Rilpl2
3.83547e-16	1.89306	0.31	0.087	8.49019e-12	Monocytes	Prdm1
8.07398e-16	1.90341	0.353	0.113	1.78726e-11	Monocytes	Itgax
1.00362e-15	1.69531	0.397	0.134	2.22162e-11	Monocytes	Mgst1
9.1948e-15	2.44571	0.302	0.094	2.03536e-10	Monocytes	Rap1gap2
9.42965e-15	1.56679	0.466	0.189	2.08735e-10	Monocytes	Bin2
2.52899e-14	1.61422	0.603	0.305	5.59818e-10	Monocytes	Nedd9
3.33173e-14	1.57867	0.543	0.254	7.37512e-10	Monocytes	Ncf4
6.2589e-14	1.65223	0.405	0.152	1.38547e-09	Monocytes	Gsto1
6.47639e-14	1.7621	0.379	0.138	1.43361e-09	Monocytes	Cyfip2
8.24095e-14	1.60878	0.276	0.08	1.82422e-09	Monocytes	Sephs2
8.72083e-14	2.62614	0.267	0.08	1.93044e-09	Monocytes	Grk3
8.79791e-14	1.59043	0.474	0.208	1.94751e-09	Monocytes	Plcg2
1.10372e-13	1.71356	0.319	0.103	2.44319e-09	Monocytes	Scd2
2.07558e-13	2.13559	0.345	0.124	4.59449e-09	Monocytes	Pot1b
2.55805e-13	1.95739	0.353	0.126	5.66251e-09	Monocytes	Acp5
3.51939e-13	1.75325	0.483	0.215	7.79053e-09	Monocytes	Gsap
4.08229e-13	1.63215	0.397	0.156	9.03655e-09	Monocytes	Fuca2
9.09308e-13	1.81521	0.362	0.135	2.01284e-08	Monocytes	Pcnx
1.5053e-12	1.94019	0.267	0.081	3.33213e-08	Monocytes	Heatr1
1.96785e-12	1.56801	0.44	0.19	4.35602e-08	Monocytes	Ak2
2.54835e-12	1.61873	0.466	0.206	5.64103e-08	Monocytes	Sema4d
5.27586e-12	1.94725	0.25	0.076	1.16786e-07	Monocytes	Tnfrsf21
1.61121e-11	1.66132	0.302	0.107	3.56658e-07	Monocytes	Pilra
2.96477e-11	1.60222	0.336	0.128	6.56281e-07	Monocytes	Gm35154
3.41405e-11	1.92582	0.448	0.22	7.55733e-07	Monocytes	Stk10
5.41091e-11	1.59036	0.328	0.125	1.19776e-06	Monocytes	Rasa4
5.44186e-11	1.67362	0.302	0.11	1.20461e-06	Monocytes	Alas1
6.36564e-11	1.548	0.284	0.097	1.4091e-06	Monocytes	Cd300lb
1.15102e-10	1.5738	0.56	0.327	2.54791e-06	Monocytes	Tnfrsf1b
2.14451e-10	1.52908	0.353	0.147	4.74709e-06	Monocytes	Aph1c
3.81612e-10	1.64074	0.716	0.448	8.44735e-06	Monocytes	Sod2
4.85546e-10	1.56489	0.276	0.1	1.0748e-05	Monocytes	Srxn1
6.95995e-10	1.61135	0.388	0.176	1.54065e-05	Monocytes	Myo1g
1.55217e-09	1.62924	0.302	0.123	3.43589e-05	Monocytes	Fn1
2.07721e-09	1.64896	0.328	0.134	4.59812e-05	Monocytes	Il17ra
1.20331e-08	1.53095	0.25	0.093	0.000266364	Monocytes	Haus8
3.79184e-08	1.59249	0.362	0.175	0.000839363	Monocytes	Grk5
3.13385e-07	1.98059	0.353	0.184	0.00693709	Monocytes	Gdf15
6.49139e-07	1.62602	0.379	0.208	0.0143693	Monocytes	Tcf7l2
1.33858e-05	1.7512	0.328	0.178	0.296307	Monocytes	Cyth3
4.03939e-05	1.65506	0.284	0.153	0.894158	Monocytes	Ripk2
0	6.23625	0.689	0.014	0	Proliferating	Birc5
0	6.91327	0.689	0.016	0	Proliferating	Pclaf
0	6.56347	0.656	0.014	0	Proliferating	Nusap1
0	6.16408	0.639	0.013	0	Proliferating	Spc24
0	5.73292	0.639	0.014	0	Proliferating	Cdca3
0	5.53446	0.607	0.012	0	Proliferating	Ccnb2
0	6.05416	0.59	0.009	0	Proliferating	Ccna2
0	7.69725	0.582	0.007	0	Proliferating	Rrm2
0	7.06796	0.525	0.006	0	Proliferating	Pbk
0	7.61864	0.484	0.004	0	Proliferating	Esco2
1.5744e-299	5.58972	0.656	0.017	3.4851e-295	Proliferating	Kif11
5.73853e-296	5.64925	0.574	0.011	1.27028e-291	Proliferating	Ube2c
2.22052e-289	6.5407	0.467	0.005	4.91535e-285	Proliferating	Bub1
6.26165e-284	5.25071	0.648	0.019	1.38608e-279	Proliferating	Prc1
4.11434e-275	5.50852	0.492	0.008	9.10751e-271	Proliferating	Hmmr
4.33003e-270	6.23904	0.484	0.008	9.58496e-266	Proliferating	Sgo1
1.52224e-264	5.26153	0.541	0.012	3.36963e-260	Proliferating	Cenpf
3.40122e-264	6.37719	0.459	0.007	7.52895e-260	Proliferating	Neil3
6.56848e-262	5.5226	0.557	0.014	1.454e-257	Proliferating	Fbxo5
1.35846e-259	6.0152	0.508	0.01	3.00708e-255	Proliferating	Kif4
1.17998e-258	7.17911	0.393	0.004	2.612e-254	Proliferating	Ska1
3.4681e-256	6.27504	0.426	0.005	7.67698e-252	Proliferating	Nuf2
2.56853e-254	5.63891	0.492	0.01	5.68571e-250	Proliferating	Shcbp1
6.67998e-253	6.14914	0.738	0.035	1.47868e-248	Proliferating	Top2a
2.70899e-250	5.47606	0.615	0.02	5.99663e-246	Proliferating	Tpx2
5.90245e-243	6.50243	0.426	0.006	1.30657e-238	Proliferating	Ncapg
4.7715e-237	5.70858	0.533	0.015	1.05622e-232	Proliferating	Kif15
1.99768e-235	5.11271	0.623	0.023	4.42206e-231	Proliferating	Cenpp
2.79889e-233	5.45097	0.607	0.022	6.19561e-229	Proliferating	Cdca8
1.3993e-231	4.96443	0.59	0.021	3.09749e-227	Proliferating	Knl1
1.02821e-229	4.94571	0.615	0.023	2.27605e-225	Proliferating	Cdk1
1.90802e-227	7.54059	0.328	0.002	4.22358e-223	Proliferating	Hist1h2af
4.69432e-227	5.20092	0.557	0.018	1.03913e-222	Proliferating	Uhrf1
1.74646e-220	6.10449	0.41	0.007	3.86596e-216	Proliferating	Rad51ap1
4.36933e-220	5.36964	0.516	0.015	9.67195e-216	Proliferating	Spc25
1.74499e-219	5.77216	0.697	0.036	3.8627e-215	Proliferating	Hist1h1b
1.19994e-217	5.67081	0.467	0.012	2.65619e-213	Proliferating	Clspn
5.55092e-214	5.48551	0.418	0.008	1.22875e-209	Proliferating	Cep55
6.56074e-212	4.9833	0.5	0.015	1.45229e-207	Proliferating	Cenpe
6.67205e-212	5.27345	0.5	0.015	1.47693e-207	Proliferating	Tk1
4.74544e-207	7.67116	0.279	0.001	1.05045e-202	Proliferating	E2f7
2.6745e-206	5.28203	0.738	0.047	5.92027e-202	Proliferating	Mki67
8.50567e-204	4.90894	0.59	0.026	1.88281e-199	Proliferating	Ncapd2
4.57709e-203	6.55632	0.344	0.005	1.01318e-198	Proliferating	Mxd3
1.7026e-202	5.1094	0.459	0.013	3.76888e-198	Proliferating	Ect2
5.63436e-200	4.73044	0.639	0.032	1.24722e-195	Proliferating	Lockd
1.89291e-198	5.65386	0.361	0.006	4.19015e-194	Proliferating	Kntc1
6.72265e-190	8.6795	0.27	0.002	1.48812e-185	Proliferating	Hist1h3c
6.40528e-189	5.33497	0.41	0.01	1.41787e-184	Proliferating	Stil
1.70968e-188	5.4927	0.41	0.01	3.78455e-184	Proliferating	Ccne2
1.79081e-188	5.23468	0.393	0.009	3.96415e-184	Proliferating	Depdc1a
7.78158e-186	5.50475	0.402	0.01	1.72253e-181	Proliferating	Brca1
1.08555e-184	4.83838	0.385	0.009	2.40297e-180	Proliferating	Aspm
8.67579e-183	4.56662	0.467	0.016	1.92047e-178	Proliferating	Cenpk
9.80651e-183	5.52549	0.713	0.051	2.17077e-178	Proliferating	Hist1h2ae
8.66113e-179	5.69686	0.369	0.008	1.91723e-174	Proliferating	Hist1h1a
1.62847e-173	6.72406	0.262	0.002	3.60478e-169	Proliferating	Aunip
1.68405e-173	5.57972	0.361	0.008	3.72781e-169	Proliferating	Kif22
2.28354e-172	4.57127	0.508	0.022	5.05484e-168	Proliferating	Asf1b
2.47037e-172	4.85163	0.459	0.017	5.46842e-168	Proliferating	Cdca7
5.06791e-172	4.83839	0.459	0.017	1.12183e-167	Proliferating	Mis18bp1
1.15096e-171	5.34257	0.369	0.009	2.54776e-167	Proliferating	E2f8
1.69458e-169	5.19581	0.369	0.009	3.75111e-165	Proliferating	Cenph
1.42635e-168	4.39782	0.434	0.015	3.15737e-164	Proliferating	Ckap2
3.29482e-168	4.65996	0.434	0.015	7.29341e-164	Proliferating	Dtl
1.85213e-167	4.66517	0.418	0.014	4.09987e-163	Proliferating	Ccdc18
6.47711e-167	4.69301	0.385	0.011	1.43377e-162	Proliferating	Dlgap5
1.29422e-166	4.20608	0.598	0.036	2.86489e-162	Proliferating	Diaph3
2.91371e-166	4.05493	0.434	0.015	6.44978e-162	Proliferating	Mns1
2.19426e-165	5.53654	0.352	0.009	4.85722e-161	Proliferating	Hist1h2bj
2.58589e-165	4.9214	0.475	0.02	5.72412e-161	Proliferating	Aurkb
1.883e-164	4.45238	0.352	0.009	4.1682e-160	Proliferating	Kifc1
2.51896e-164	5.42111	0.311	0.006	5.57598e-160	Proliferating	Polq
6.9879e-164	4.51495	0.443	0.017	1.54684e-159	Proliferating	Hmgb3
2.71454e-161	4.54696	0.598	0.038	6.00891e-157	Proliferating	Tyms
6.697e-161	5.49546	0.762	0.072	1.48245e-156	Proliferating	Hist1h2ap
5.71724e-160	5.84499	0.32	0.007	1.26557e-155	Proliferating	Cenpm
4.60638e-159	4.77568	0.32	0.007	1.01967e-154	Proliferating	Chek1
1.02216e-158	4.89646	0.369	0.011	2.26264e-154	Proliferating	Cdc6
1.89367e-158	4.51421	0.402	0.013	4.19182e-154	Proliferating	Cdc20
1.88905e-154	6.12507	0.254	0.003	4.1816e-150	Proliferating	Hist1h2bb
4.93233e-154	4.40098	0.475	0.022	1.09182e-149	Proliferating	Ckap2l
7.46422e-154	5.21597	0.918	0.134	1.65228e-149	Proliferating	Stmn1
1.85999e-152	5.71795	0.287	0.005	4.11728e-148	Proliferating	Kif2c
1.24465e-151	5.22731	0.336	0.009	2.75515e-147	Proliferating	Sgo2a
4.92484e-151	4.11917	0.352	0.01	1.09016e-146	Proliferating	Ccnb1
1.8958e-150	3.70409	0.451	0.02	4.19654e-146	Proliferating	Dntt
3.3291e-150	5.18585	0.352	0.01	7.36929e-146	Proliferating	Cdc45
3.72173e-150	4.82868	0.328	0.008	8.23843e-146	Proliferating	Foxm1
5.84016e-147	5.78801	0.254	0.004	1.29278e-142	Proliferating	Ttk
8.48528e-147	4.32219	0.377	0.013	1.8783e-142	Proliferating	Rad51
2.58201e-146	4.27013	0.5	0.027	5.71553e-142	Proliferating	Tacc3
3.87966e-146	4.33763	0.451	0.021	8.58802e-142	Proliferating	Bub1b
4.97553e-146	4.07592	0.582	0.039	1.10138e-141	Proliferating	Racgap1
8.51727e-146	4.18937	0.475	0.024	1.88538e-141	Proliferating	Mad2l1
1.04244e-144	6.08743	0.287	0.006	2.30754e-140	Proliferating	Cdca5
1.91116e-143	5.82199	0.254	0.004	4.23054e-139	Proliferating	Hist1h2an
9.23679e-140	4.12723	0.738	0.078	2.04466e-135	Proliferating	Cks1b
1.65673e-138	4.22297	0.713	0.071	3.66734e-134	Proliferating	Smc2
2.40246e-137	5.77904	0.262	0.005	5.31808e-133	Proliferating	Kif18b
5.10571e-137	2.93196	0.475	0.025	1.1302e-132	Proliferating	Arpp21
6.64597e-136	3.50163	0.328	0.01	1.47115e-131	Proliferating	Dgkeos
1.57509e-133	4.64074	0.336	0.011	3.48662e-129	Proliferating	Bard1
2.79685e-133	4.511	0.287	0.007	6.19111e-129	Proliferating	Kif20a
4.91278e-132	3.93424	0.426	0.021	1.08749e-127	Proliferating	Ndc80
3.43004e-130	4.41553	0.328	0.011	7.59273e-126	Proliferating	Fignl1
3.38963e-128	3.76551	0.689	0.07	7.50328e-124	Proliferating	Gmnn
5.09384e-128	3.48853	0.639	0.057	1.12757e-123	Proliferating	Cenpw
3.90525e-127	3.91784	0.443	0.024	8.64466e-123	Proliferating	Kif20b
3.44867e-126	5.65813	0.254	0.005	7.63397e-122	Proliferating	Parpbp
4.43401e-126	3.97497	0.336	0.012	9.81513e-122	Proliferating	Rmi2
9.26156e-126	4.75538	0.279	0.007	2.05014e-121	Proliferating	Spag5
3.59769e-125	4.91762	0.287	0.008	7.96384e-121	Proliferating	Cenpn
8.11288e-125	4.56526	0.385	0.018	1.79587e-120	Proliferating	Brip1
1.66395e-124	5.52047	0.262	0.006	3.68333e-120	Proliferating	Cdca2
3.50392e-123	3.8699	0.484	0.032	7.75628e-119	Proliferating	Prim1
4.15573e-122	3.02559	0.467	0.029	9.19912e-118	Proliferating	Myb
8.3244e-122	4.87061	0.279	0.008	1.84269e-117	Proliferating	Melk
1.01396e-121	4.49766	0.303	0.01	2.2445e-117	Proliferating	Cdkn3
1.41926e-119	4.16281	0.361	0.016	3.14168e-115	Proliferating	Ncaph
2.506e-117	3.28516	0.434	0.026	5.54728e-113	Proliferating	Ska2
2.32562e-116	4.08901	0.754	0.101	5.148e-112	Proliferating	H2afx
8.30283e-116	3.64463	0.77	0.104	1.83791e-111	Proliferating	Ezh2
4.79927e-114	4.05164	0.361	0.017	1.06237e-109	Proliferating	Ccnf
9.017e-114	3.36832	0.475	0.033	1.996e-109	Proliferating	Kif18a
1.84254e-113	3.85787	0.492	0.037	4.07864e-109	Proliferating	Hells
1.38805e-112	4.93737	0.27	0.008	3.07258e-108	Proliferating	Iqgap3
3.20562e-112	4.4418	0.27	0.008	7.09595e-108	Proliferating	Plk1
3.24466e-111	4.04258	0.328	0.014	7.18238e-107	Proliferating	Pole
1.07971e-110	4.38209	0.303	0.012	2.39005e-106	Proliferating	Cdc7
1.72868e-110	3.31485	0.631	0.066	3.82661e-106	Proliferating	Lig1
1.29268e-108	3.23675	0.541	0.047	2.86148e-104	Proliferating	Rfc4
1.10626e-107	2.88273	0.328	0.014	2.44882e-103	Proliferating	Aqp11
1.19723e-107	3.42295	0.508	0.042	2.65018e-103	Proliferating	Mcm5
8.11375e-107	3.374	0.656	0.076	1.79606e-102	Proliferating	Mcm7
2.84366e-106	4.19216	0.32	0.014	6.29473e-102	Proliferating	Zwilch
3.14275e-106	3.67795	0.262	0.008	6.95679e-102	Proliferating	Syt13
1.96931e-105	3.99539	0.344	0.017	4.35928e-101	Proliferating	Dhfr
4.02611e-105	3.86455	0.328	0.015	8.91219e-101	Proliferating	Cit
1.70455e-103	4.72678	0.393	0.024	3.77319e-99	Proliferating	Hist2h2ac
1.46639e-101	3.13357	0.311	0.014	3.24601e-97	Proliferating	Endou
9.66814e-101	4.48175	0.279	0.011	2.14014e-96	Proliferating	Aurka
2.05222e-100	3.61427	0.361	0.02	4.54279e-96	Proliferating	Cenps
2.31192e-100	3.55761	0.361	0.02	5.11767e-96	Proliferating	Knstrn
2.94927e-100	3.5693	0.369	0.022	6.52851e-96	Proliferating	Zgrf1
6.51145e-100	4.62223	0.287	0.012	1.44137e-95	Proliferating	Mastl
1.27483e-99	3.84119	0.41	0.028	2.82197e-95	Proliferating	Atad5
2.06304e-99	4.1486	0.738	0.118	4.56675e-95	Proliferating	Dut
2.11163e-99	2.92437	0.525	0.048	4.67431e-95	Proliferating	Plk4
5.20621e-99	3.01424	0.262	0.009	1.15245e-94	Proliferating	H2-Q2
1.67396e-97	4.10087	0.279	0.011	3.70547e-93	Proliferating	Trip13
2.39048e-97	3.45393	0.492	0.044	5.29157e-93	Proliferating	Wdr76
5.13519e-97	1.76669	0.295	0.013	1.13673e-92	Proliferating	Trdc
1.84297e-96	3.15286	0.533	0.053	4.07961e-92	Proliferating	Xrcc6
5.6738e-94	3.77069	0.287	0.013	1.25595e-89	Proliferating	4930579G24Rik
4.67457e-92	3.49934	0.385	0.027	1.03476e-87	Proliferating	Ube2t
5.84929e-90	2.98103	0.279	0.013	1.2948e-85	Proliferating	Colq
8.77503e-90	4.36062	0.262	0.011	1.94244e-85	Proliferating	Cenpi
1.73006e-89	2.74003	0.451	0.039	3.82967e-85	Proliferating	2610307P16Rik
2.69062e-89	3.19807	0.557	0.062	5.95595e-85	Proliferating	Incenp
5.87094e-89	3.27359	0.434	0.036	1.29959e-84	Proliferating	Rfc5
5.91256e-89	3.45371	0.451	0.04	1.3088e-84	Proliferating	Kif23
6.29253e-89	3.66043	0.311	0.017	1.39291e-84	Proliferating	Pkmyt1
6.94806e-88	3.53597	0.344	0.022	1.53802e-83	Proliferating	Mbnl3
1.12158e-87	2.85502	0.705	0.108	2.48272e-83	Proliferating	Dnajc9
3.25576e-87	3.33772	0.943	0.265	7.20695e-83	Proliferating	Hmgn2
1.59037e-86	3.70817	0.303	0.017	3.52045e-82	Proliferating	Chaf1a
5.13185e-86	2.87192	0.492	0.049	1.13599e-81	Proliferating	Trim59
4.23764e-84	2.882	0.656	0.095	9.38043e-80	Proliferating	Tipin
7.48557e-84	3.02442	0.861	0.195	1.65701e-79	Proliferating	Smc4
5.95597e-83	3.8668	0.303	0.018	1.31841e-78	Proliferating	Cip2a
2.89566e-82	3.13544	0.582	0.078	6.40984e-78	Proliferating	Rrm1
6.81564e-82	3.56205	0.336	0.023	1.50871e-77	Proliferating	Bora
2.04058e-81	2.42128	0.336	0.022	4.51702e-77	Proliferating	Trat1
3.05248e-79	3.14182	0.689	0.118	6.75698e-75	Proliferating	Atad2
5.6886e-79	3.47057	0.41	0.037	1.25923e-74	Proliferating	Phgdh
9.1944e-79	3.76658	0.443	0.044	2.03527e-74	Proliferating	Hist1h1d
1.3858e-78	3.24705	0.443	0.044	3.0676e-74	Proliferating	Hirip3
1.86079e-77	2.8666	0.5	0.057	4.11904e-73	Proliferating	Rfc3
1.77027e-76	4.00439	0.311	0.021	3.91866e-72	Proliferating	Hist1h3e
2.67244e-76	3.47468	0.344	0.026	5.91571e-72	Proliferating	Gins2
5.92696e-75	1.85659	0.328	0.023	1.31199e-70	Proliferating	Rag1
9.19959e-75	2.77292	0.566	0.077	2.03642e-70	Proliferating	Cdkn2c
2.9343e-74	3.01976	0.566	0.079	6.49536e-70	Proliferating	Ncapg2
8.80736e-74	3.73213	0.279	0.017	1.9496e-69	Proliferating	Psmc3ip
3.55022e-73	2.57395	0.582	0.083	7.85876e-69	Proliferating	Hjurp
4.53905e-73	3.51437	0.352	0.029	1.00476e-68	Proliferating	E2f2
5.24038e-73	2.8764	0.549	0.077	1.16001e-68	Proliferating	Tcf7
6.40775e-73	2.93863	0.705	0.132	1.41842e-68	Proliferating	Nsd2
1.444e-72	2.93187	0.459	0.05	3.19644e-68	Proliferating	Sh2d1a
8.5593e-72	3.0683	0.508	0.066	1.89469e-67	Proliferating	Ncapd3
2.3033e-69	3.50073	0.566	0.087	5.09858e-65	Proliferating	Hist1h4d
3.52304e-69	3.45997	0.336	0.028	7.7986e-65	Proliferating	Ulbp1
1.02197e-68	2.46659	0.656	0.113	2.26223e-64	Proliferating	Topbp1
2.36926e-68	2.8024	0.623	0.104	5.2446e-64	Proliferating	Tfdp1
2.70064e-68	2.76079	0.352	0.031	5.97814e-64	Proliferating	Cenpl
2.77348e-68	3.39917	0.402	0.042	6.13939e-64	Proliferating	Mms22l
1.41259e-67	3.03898	0.344	0.03	3.1269e-63	Proliferating	Ttf2
2.07462e-67	2.86505	0.557	0.085	4.59237e-63	Proliferating	Orc6
1.11254e-66	3.06899	0.336	0.029	2.46273e-62	Proliferating	Efcab11
7.23027e-66	2.44701	0.582	0.09	1.60049e-61	Proliferating	Mcm3
1.33341e-65	3.07803	0.385	0.039	2.95163e-61	Proliferating	Mcm2
3.3376e-65	3.57741	0.262	0.018	7.38812e-61	Proliferating	1500009L16Rik
5.88987e-65	2.55224	0.992	0.726	1.30378e-60	Proliferating	Hmgb1
1.04797e-64	2.34893	0.615	0.103	2.31978e-60	Proliferating	Cmc2
1.60555e-64	2.56883	0.459	0.056	3.55405e-60	Proliferating	Haus4
2.78616e-64	3.14504	0.336	0.03	6.16744e-60	Proliferating	Wdhd1
1.07555e-63	2.56166	0.41	0.045	2.38084e-59	Proliferating	Fen1
8.61297e-63	2.59618	0.607	0.104	1.90657e-58	Proliferating	Ccdc34
9.44202e-63	2.77689	0.885	0.295	2.09009e-58	Proliferating	Anp32e
8.0198e-62	2.42581	0.508	0.072	1.77526e-57	Proliferating	Rnaseh2b
1.14861e-61	2.4848	0.639	0.123	2.54256e-57	Proliferating	Usp1
1.86329e-61	2.44859	0.516	0.075	4.12457e-57	Proliferating	Rpa2
5.05241e-61	2.68982	0.811	0.236	1.1184e-56	Proliferating	Tmpo
5.12233e-61	2.62677	0.402	0.047	1.13388e-56	Proliferating	Sox4
6.79504e-61	2.60827	0.664	0.135	1.50415e-56	Proliferating	Cbx5
9.20703e-61	2.68589	0.639	0.122	2.03807e-56	Proliferating	Cenpa
3.33091e-60	2.91314	0.598	0.111	7.3733e-56	Proliferating	Desi1
5.85721e-59	2.37629	0.885	0.327	1.29655e-54	Proliferating	Snrpd1
1.78347e-58	2.387	0.541	0.088	3.94789e-54	Proliferating	Rfwd3
9.69054e-58	2.6428	0.68	0.152	2.1451e-53	Proliferating	Dtymk
1.49906e-57	2.58158	0.934	0.425	3.31832e-53	Proliferating	H2afv
6.26477e-57	1.8096	1	0.97	1.38677e-52	Proliferating	Ptma
9.82212e-57	2.5625	0.648	0.137	2.17422e-52	Proliferating	Dnmt1
1.95368e-56	3.13667	0.262	0.021	4.32466e-52	Proliferating	Brca2
2.10937e-56	2.69383	0.484	0.073	4.66929e-52	Proliferating	Mcm4
2.11203e-56	2.78146	0.934	0.539	4.6752e-52	Proliferating	Tubb5
7.58694e-56	2.6753	0.631	0.133	1.67944e-51	Proliferating	Pola1
7.64918e-56	2.6168	0.352	0.039	1.69322e-51	Proliferating	Rcc1
1.10993e-55	2.59612	0.393	0.048	2.45693e-51	Proliferating	Lin9
5.46461e-55	2.46381	0.361	0.041	1.20965e-50	Proliferating	Ppil1
7.89814e-55	2.51066	0.549	0.098	1.74833e-50	Proliferating	Mcm6
1.53448e-54	2.80167	0.279	0.024	3.39673e-50	Proliferating	Chaf1b
2.66335e-53	2.75829	0.418	0.059	5.89558e-49	Proliferating	Ldhb
2.94462e-52	2.03374	0.566	0.103	6.51821e-48	Proliferating	Lat
5.13765e-52	2.11709	0.426	0.059	1.13727e-47	Proliferating	Nup210
7.6388e-52	2.03607	0.541	0.094	1.69093e-47	Proliferating	Pmf1
1.53169e-51	2.29266	0.918	0.508	3.39055e-47	Proliferating	Ran
1.98434e-51	2.9615	0.41	0.059	4.39252e-47	Proliferating	Anln
2.36505e-51	2.55353	0.607	0.131	5.23527e-47	Proliferating	Lsm2
2.47328e-51	2.80199	0.623	0.143	5.47485e-47	Proliferating	Trbc2
3.3196e-51	2.85409	0.328	0.037	7.34826e-47	Proliferating	Ccdc138
5.19832e-51	3.07691	0.639	0.147	1.1507e-46	Proliferating	Hist1h1e
5.55559e-51	2.13887	0.664	0.146	1.22978e-46	Proliferating	Rpa3
1.43113e-50	2.59289	0.525	0.097	3.16795e-46	Proliferating	Zfp367
8.56906e-50	2.42891	0.713	0.197	1.89685e-45	Proliferating	Selenoh
1.06883e-49	2.30368	0.508	0.089	2.36595e-45	Proliferating	Bcl11b
1.3667e-49	2.19975	0.385	0.053	3.02533e-45	Proliferating	Nck2
1.44095e-49	1.7676	0.541	0.096	3.18968e-45	Proliferating	Cd247
1.6799e-49	2.12564	0.902	0.389	3.71863e-45	Proliferating	Cbx3
8.59141e-49	1.97312	0.738	0.192	1.90179e-44	Proliferating	Lmnb1
1.1324e-48	2.25898	0.713	0.193	2.50668e-44	Proliferating	Cks2
1.13538e-48	1.88503	0.549	0.102	2.51328e-44	Proliferating	Camk4
1.14381e-48	2.93418	0.926	0.683	2.53193e-44	Proliferating	Hmgb2
1.51909e-48	2.76314	0.311	0.035	3.36265e-44	Proliferating	Suv39h1
3.26101e-48	2.23146	0.926	0.484	7.21857e-44	Proliferating	Anp32b
1.5183e-47	2.39906	0.41	0.061	3.3609e-43	Proliferating	Rbl1
1.56458e-47	2.21011	0.344	0.043	3.46335e-43	Proliferating	2610020C07Rik
1.84784e-47	1.93353	0.254	0.023	4.09039e-43	Proliferating	Nsg2
2.05702e-47	1.95945	0.549	0.103	4.55342e-43	Proliferating	Lck
3.5026e-47	2.07812	0.459	0.075	7.75335e-43	Proliferating	Magi3
4.10736e-47	2.20126	0.484	0.082	9.09205e-43	Proliferating	Nt5dc2
5.4151e-47	2.33754	0.393	0.056	1.19869e-42	Proliferating	Ly6d
6.41345e-47	2.33801	0.451	0.073	1.41968e-42	Proliferating	Nrm
6.81339e-47	1.90065	0.344	0.043	1.50821e-42	Proliferating	Sla2
7.0884e-47	2.20952	0.516	0.099	1.56909e-42	Proliferating	Cd24a
8.5777e-47	2.08463	0.484	0.084	1.89876e-42	Proliferating	Ppih
1.79195e-46	2.41879	0.525	0.104	3.96665e-42	Proliferating	Spint2
2.16713e-46	2.83163	0.328	0.041	4.79716e-42	Proliferating	Tubg1
2.20106e-46	1.99597	0.943	0.48	4.87227e-42	Proliferating	Ube2s
4.89812e-46	1.98364	0.877	0.353	1.08425e-41	Proliferating	Rbbp4
5.7943e-46	1.91552	0.402	0.059	1.28263e-41	Proliferating	Cenpq
7.03163e-46	2.09824	0.344	0.045	1.55652e-41	Proliferating	Ift80
8.87343e-46	2.16324	0.582	0.125	1.96422e-41	Proliferating	Rif1
2.05784e-45	2.0534	0.369	0.051	4.55523e-41	Proliferating	Nup85
3.36588e-45	2.33787	0.484	0.09	7.4507e-41	Proliferating	Prim2
4.88181e-45	2.25108	0.77	0.253	1.08064e-40	Proliferating	Tubb4b
5.77578e-45	1.96738	0.877	0.37	1.27853e-40	Proliferating	Alyref
7.98431e-45	2.11288	0.311	0.037	1.76741e-40	Proliferating	Cep97
1.19771e-44	2.03858	0.967	0.82	2.65124e-40	Proliferating	H2afz
1.61679e-44	1.9725	0.402	0.061	3.57893e-40	Proliferating	Haus6
2.55027e-44	1.69515	0.598	0.139	5.64527e-40	Proliferating	Gm4258
2.6038e-44	2.17242	0.566	0.118	5.76378e-40	Proliferating	Rangap1
2.61037e-44	2.26646	0.279	0.03	5.77831e-40	Proliferating	Wdr78
4.46398e-44	2.32288	0.344	0.047	9.88147e-40	Proliferating	Blm
5.58322e-44	2.14233	0.492	0.094	1.2359e-39	Proliferating	Hmgn5
1.38775e-42	1.55658	0.566	0.118	3.07192e-38	Proliferating	Themis
1.65857e-42	2.04827	0.475	0.088	3.67142e-38	Proliferating	Nxt1
2.95622e-42	2.18594	0.631	0.159	6.54389e-38	Proliferating	Psip1
3.17781e-42	2.15208	0.41	0.068	7.0344e-38	Proliferating	Asf1a
7.82694e-42	2.54897	0.295	0.036	1.73257e-37	Proliferating	Prickle1
7.88115e-42	2.5067	0.303	0.038	1.74457e-37	Proliferating	A630089N07Rik
2.15505e-41	1.9766	0.41	0.068	4.77041e-37	Proliferating	Rad18
2.7725e-41	2.16694	0.615	0.158	6.13722e-37	Proliferating	Dctpp1
3.14029e-41	2.08007	0.369	0.055	6.95134e-37	Proliferating	Lef1
3.22028e-41	1.92598	0.484	0.092	7.12842e-37	Proliferating	Thy1
4.06129e-41	1.89509	0.344	0.048	8.99007e-37	Proliferating	Mphosph9
5.34596e-41	2.81443	0.352	0.053	1.18338e-36	Proliferating	Hist1h4h
6.9392e-41	1.91966	0.352	0.051	1.53606e-36	Proliferating	Impa2
7.23649e-41	2.20182	0.41	0.069	1.60187e-36	Proliferating	Trim37
1.85712e-40	1.6978	0.566	0.129	4.11093e-36	Proliferating	Satb1
2.35145e-40	2.07733	0.451	0.084	5.20516e-36	Proliferating	Ptpn7
2.55027e-40	2.50367	0.344	0.052	5.64528e-36	Proliferating	Uck2
3.48767e-40	2.57695	0.402	0.069	7.72031e-36	Proliferating	Gm43305
4.02993e-40	1.83608	0.803	0.293	8.92066e-36	Proliferating	Banf1
8.43272e-40	1.71833	0.754	0.226	1.86667e-35	Proliferating	Maz
8.62248e-40	2.33379	0.32	0.044	1.90867e-35	Proliferating	Haus1
1.06071e-39	1.87368	0.77	0.257	2.34798e-35	Proliferating	Cbx1
1.4145e-39	1.85654	0.869	0.393	3.13114e-35	Proliferating	Ranbp1
2.6004e-39	2.7366	0.279	0.035	5.75625e-35	Proliferating	Tubb2b
2.83923e-39	1.55503	0.582	0.134	6.28492e-35	Proliferating	Dck
5.04574e-39	1.95221	0.377	0.061	1.11692e-34	Proliferating	Sass6
6.86474e-39	1.70606	0.598	0.142	1.51958e-34	Proliferating	Cd3g
7.16535e-39	2.35758	0.27	0.032	1.58612e-34	Proliferating	Pms2
1.22888e-38	1.51001	0.959	0.62	2.72026e-34	Proliferating	Snrpe
1.59529e-38	1.98638	0.713	0.233	3.53133e-34	Proliferating	Nasp
1.81588e-38	2.37683	0.262	0.031	4.01963e-34	Proliferating	Skp2
3.73318e-38	1.99754	0.877	0.464	8.26377e-34	Proliferating	Dek
5.0662e-38	1.69218	0.656	0.178	1.12145e-33	Proliferating	Myef2
5.14155e-38	1.88035	0.582	0.144	1.13813e-33	Proliferating	Sae1
5.69337e-38	1.84448	0.705	0.225	1.26028e-33	Proliferating	Cdk4
6.21126e-38	1.76258	0.787	0.266	1.37492e-33	Proliferating	Rbbp7
7.40799e-38	2.38046	0.287	0.038	1.63983e-33	Proliferating	Cep57l1
7.70195e-38	2.08038	0.598	0.156	1.7049e-33	Proliferating	Ckap5
1.03506e-37	1.98515	0.418	0.08	2.2912e-33	Proliferating	Kcnq5
1.17693e-37	1.772	0.705	0.207	2.60525e-33	Proliferating	Ssna1
1.40462e-37	1.62452	0.598	0.141	3.10926e-33	Proliferating	Cd3d
2.05178e-37	2.03261	0.852	0.386	4.54181e-33	Proliferating	Nucks1
2.16839e-37	2.40262	0.262	0.032	4.79994e-33	Proliferating	Pold2
2.43425e-37	2.69472	0.41	0.081	5.38846e-33	Proliferating	Ikzf2
3.03896e-37	2.12063	0.557	0.139	6.72704e-33	Proliferating	Rgcc
3.35364e-37	2.00398	0.762	0.288	7.42361e-33	Proliferating	Erh
3.39553e-37	2.34779	0.852	0.508	7.51635e-33	Proliferating	Tuba1b
4.57241e-37	1.59473	0.541	0.122	1.01215e-32	Proliferating	Cep128
5.03198e-37	2.6618	0.262	0.032	1.11388e-32	Proliferating	Apoo
5.5295e-37	2.14859	0.295	0.04	1.22401e-32	Proliferating	Etaa1
1.00431e-36	1.66881	0.426	0.079	2.22314e-32	Proliferating	Haus3
1.21415e-36	1.84005	0.779	0.27	2.68765e-32	Proliferating	Smc1a
1.56759e-36	2.13768	0.279	0.037	3.47002e-32	Proliferating	Polh
2.10158e-36	1.62445	0.557	0.129	4.65206e-32	Proliferating	Cd3e
2.5271e-36	2.28826	0.262	0.033	5.59398e-32	Proliferating	Bcl7a
3.34019e-36	1.77046	0.434	0.083	7.39384e-32	Proliferating	Naa40
3.39868e-36	1.89541	0.705	0.22	7.52331e-32	Proliferating	Mrpl18
3.51009e-36	2.21028	0.303	0.044	7.76993e-32	Proliferating	Itgb3bp
3.55332e-36	2.17876	0.557	0.139	7.86562e-32	Proliferating	Rad51b
4.72367e-36	2.08095	0.41	0.077	1.04563e-31	Proliferating	Npat
6.07726e-36	1.80766	0.59	0.15	1.34526e-31	Proliferating	Snrpa1
1.09196e-35	1.65788	0.361	0.06	2.41715e-31	Proliferating	Cdk2
1.46571e-35	1.71622	0.615	0.161	3.2445e-31	Proliferating	Exosc8
1.91312e-35	2.39019	0.254	0.032	4.23487e-31	Proliferating	Cdc25a
2.03988e-35	2.31022	0.41	0.079	4.51547e-31	Proliferating	Cdt1
2.09062e-35	1.73048	0.73	0.253	4.62779e-31	Proliferating	Anapc5
2.32122e-35	2.80417	0.287	0.04	5.13826e-31	Proliferating	Gm5914
2.87015e-35	2.48408	0.254	0.032	6.35335e-31	Proliferating	Mdm1
4.63023e-35	2.02109	0.287	0.04	1.02495e-30	Proliferating	Nebl
5.07672e-35	1.69198	0.582	0.15	1.12378e-30	Proliferating	Ubap2
8.50768e-35	1.62748	0.713	0.222	1.88326e-30	Proliferating	Hpf1
1.1677e-34	1.75966	0.639	0.185	2.58481e-30	Proliferating	Smarcc1
1.22179e-34	1.78486	0.738	0.263	2.70455e-30	Proliferating	Pa2g4
1.45347e-34	1.7481	0.607	0.163	3.21739e-30	Proliferating	Rfc1
1.72228e-34	2.17311	0.27	0.036	3.81244e-30	Proliferating	Dnaaf2
3.30885e-34	2.04925	0.377	0.068	7.32446e-30	Proliferating	Nup160
5.33864e-34	1.98782	0.746	0.268	1.18176e-29	Proliferating	Ctcf
9.41368e-34	1.50803	0.713	0.216	2.08381e-29	Proliferating	Csrp1
1.35288e-33	2.28289	0.303	0.047	2.99474e-29	Proliferating	Alms1
1.43798e-33	1.88218	0.328	0.054	3.18311e-29	Proliferating	Asrgl1
1.46878e-33	1.90715	0.336	0.056	3.25129e-29	Proliferating	Tbc1d31
1.64593e-33	2.04469	0.475	0.11	3.64343e-29	Proliferating	Cdkn2d
1.71827e-33	2.18103	0.516	0.131	3.80355e-29	Proliferating	Bzw2
1.88407e-33	1.62902	0.402	0.077	4.17057e-29	Proliferating	Rbmx
2.8983e-33	2.44422	0.287	0.044	6.41567e-29	Proliferating	Fxn
4.28674e-33	1.80541	0.648	0.202	9.48914e-29	Proliferating	Lsm3
7.50066e-33	2.47978	0.402	0.086	1.66035e-28	Proliferating	Trbc1
1.28966e-32	1.69188	0.705	0.237	2.8548e-28	Proliferating	Nudt21
1.85572e-32	1.72038	0.443	0.096	4.10783e-28	Proliferating	Nfyb
3.13009e-32	1.95517	0.361	0.067	6.92877e-28	Proliferating	Cd8a
3.81926e-32	1.81865	0.557	0.153	8.45431e-28	Proliferating	Ddx39
3.94157e-32	1.89517	0.484	0.117	8.72505e-28	Proliferating	Aarsd1
4.82143e-32	1.57902	0.467	0.105	1.06727e-27	Proliferating	Prps2
6.09704e-32	1.85189	0.336	0.058	1.34964e-27	Proliferating	Slamf6
9.60095e-32	1.96313	0.352	0.064	2.12527e-27	Proliferating	Ints7
1.52585e-31	1.5922	0.697	0.233	3.37762e-27	Proliferating	Smc3
1.7266e-31	1.65471	0.344	0.061	3.82201e-27	Proliferating	Trp53i11
2.1027e-31	1.7269	0.598	0.173	4.65453e-27	Proliferating	Mrpl58
2.37966e-31	1.54285	0.68	0.215	5.26761e-27	Proliferating	Ssrp1
2.81082e-31	2.09337	0.418	0.092	6.22203e-27	Proliferating	Mthfd2
3.25476e-31	1.74348	0.508	0.128	7.20474e-27	Proliferating	Eif1ad
3.9639e-31	1.76992	0.533	0.142	8.77448e-27	Proliferating	Ilf2
4.16731e-31	2.09469	0.369	0.072	9.22475e-27	Proliferating	Ubr7
6.00223e-31	1.61229	0.631	0.192	1.32865e-26	Proliferating	Uchl5
1.12041e-30	1.89135	0.361	0.069	2.48015e-26	Proliferating	Nt5c3b
1.1721e-30	1.67017	0.738	0.296	2.59456e-26	Proliferating	Nudc
2.70481e-30	1.69247	0.402	0.085	5.98737e-26	Proliferating	Cenpc1
2.72852e-30	1.73923	0.385	0.079	6.03985e-26	Proliferating	Hist3h2ba
3.01489e-30	1.92851	0.328	0.058	6.67376e-26	Proliferating	E2f1
3.40628e-30	2.17256	0.328	0.06	7.54015e-26	Proliferating	Syce2
3.7256e-30	1.50727	0.557	0.148	8.24698e-26	Proliferating	Ptprcap
4.90946e-30	1.79658	0.574	0.181	1.08676e-25	Proliferating	Rhoh
4.99437e-30	1.56128	0.648	0.202	1.10555e-25	Proliferating	Lsm8
6.28272e-30	1.82729	0.418	0.092	1.39074e-25	Proliferating	Gar1
1.34016e-29	2.1169	0.336	0.064	2.96658e-25	Proliferating	Patz1
4.83175e-29	2.1086	0.287	0.048	1.06956e-24	Proliferating	Ctps
6.9918e-29	1.65202	0.484	0.124	1.5477e-24	Proliferating	Casp8ap2
1.00559e-28	1.52943	0.352	0.068	2.22596e-24	Proliferating	Rbm10
1.32096e-28	1.51706	0.713	0.246	2.92409e-24	Proliferating	Lbr
1.38832e-28	1.56068	0.705	0.253	3.07318e-24	Proliferating	Suz12
1.58402e-28	1.93684	0.295	0.051	3.50638e-24	Proliferating	Idi1
2.26456e-28	1.95756	0.369	0.077	5.01283e-24	Proliferating	Arhgap11a
2.29057e-28	1.79993	0.664	0.234	5.0704e-24	Proliferating	Pnn
2.50403e-28	2.18979	0.328	0.063	5.54291e-24	Proliferating	Rras2
4.42128e-28	1.51182	0.451	0.107	9.78696e-24	Proliferating	Casp3
4.5168e-28	1.5216	0.484	0.125	9.9984e-24	Proliferating	Cep57
6.40503e-28	1.5972	0.361	0.073	1.41782e-23	Proliferating	G2e3
7.22223e-28	2.14016	0.369	0.08	1.59871e-23	Proliferating	Ankrd28
7.83868e-28	1.52723	0.393	0.086	1.73517e-23	Proliferating	Hdac7
8.9953e-28	1.69005	0.352	0.071	1.9912e-23	Proliferating	Nup155
1.19501e-27	2.23607	0.287	0.051	2.64527e-23	Proliferating	Hist1h2be
1.38264e-27	2.05398	0.27	0.045	3.06062e-23	Proliferating	Ccdc15
1.55984e-27	1.77454	0.631	0.224	3.45287e-23	Proliferating	Siva1
1.62157e-27	1.52825	0.877	0.524	3.58951e-23	Proliferating	Hnrnpab
1.83628e-27	1.89968	0.41	0.097	4.06479e-23	Proliferating	Rpa1
1.96183e-27	1.79043	0.402	0.092	4.3427e-23	Proliferating	Tapt1
2.15398e-27	1.79957	0.393	0.089	4.76806e-23	Proliferating	Pole3
4.38711e-27	1.82259	0.705	0.278	9.71131e-23	Proliferating	Slbp
4.44971e-27	1.51394	0.32	0.06	9.84988e-23	Proliferating	Gstcd
5.74077e-27	1.9882	0.525	0.159	1.27078e-22	Proliferating	Strbp
1.06563e-26	2.15523	0.336	0.07	2.35889e-22	Proliferating	Zbed4
1.2018e-26	1.59797	0.754	0.327	2.66031e-22	Proliferating	U2af1
1.51306e-26	1.78721	0.311	0.06	3.34932e-22	Proliferating	Paxip1
1.81681e-26	1.55606	0.484	0.128	4.02169e-22	Proliferating	Vars
3.95076e-26	1.79535	0.484	0.132	8.74541e-22	Proliferating	Mtf2
4.00556e-26	1.53632	0.336	0.068	8.8667e-22	Proliferating	Nemp1
4.38914e-26	1.64785	0.615	0.219	9.7158e-22	Proliferating	Ramp1
4.72009e-26	1.52934	0.566	0.17	1.04484e-21	Proliferating	Pin1
4.8866e-26	2.47903	0.279	0.051	1.0817e-21	Proliferating	Nup107
5.40553e-26	1.71401	0.369	0.082	1.19657e-21	Proliferating	1190007I07Rik
5.75229e-26	1.61358	0.361	0.079	1.27333e-21	Proliferating	N4bp2
6.38391e-26	1.53091	0.5	0.137	1.41314e-21	Proliferating	Dap3
6.56211e-26	1.92552	0.311	0.061	1.45259e-21	Proliferating	Umps
1.13694e-25	1.58083	0.451	0.119	2.51673e-21	Proliferating	Rdm1
1.13827e-25	1.65645	0.311	0.061	2.51967e-21	Proliferating	Psph
1.81734e-25	1.56848	0.762	0.34	4.02287e-21	Proliferating	Lsm5
2.22905e-25	1.7139	0.393	0.094	4.93423e-21	Proliferating	Pold3
2.84493e-25	1.78215	0.287	0.053	6.29754e-21	Proliferating	Stk26
5.77379e-25	1.58628	0.426	0.108	1.27809e-20	Proliferating	Dynlt1f
6.22745e-25	1.63421	0.615	0.211	1.37851e-20	Proliferating	Baz1b
7.22545e-25	1.61669	0.328	0.069	1.59943e-20	Proliferating	Gmcl1
8.57941e-25	1.6112	0.5	0.144	1.89914e-20	Proliferating	Rfc2
8.64496e-25	1.5343	0.549	0.17	1.91365e-20	Proliferating	Snrnp40
1.08946e-24	1.79519	0.287	0.054	2.41163e-20	Proliferating	Dgcr8
1.12728e-24	2.30746	0.27	0.051	2.49534e-20	Proliferating	Hist2h2aa1
1.43501e-24	1.96281	0.328	0.07	3.17654e-20	Proliferating	Coq7
1.76967e-24	1.92026	0.287	0.055	3.91734e-20	Proliferating	Gm49980
1.88456e-24	1.83847	0.443	0.12	4.17166e-20	Proliferating	Znrd2
2.27394e-24	1.56673	0.418	0.108	5.0336e-20	Proliferating	Nudt5
3.75769e-24	2.17289	0.303	0.064	8.31803e-20	Proliferating	Fdps
1.07196e-23	1.62835	0.352	0.079	2.37289e-19	Proliferating	Reep4
1.1942e-23	1.82815	0.254	0.045	2.64347e-19	Proliferating	Them6
1.25278e-23	1.54424	0.5	0.151	2.77316e-19	Proliferating	Actl6a
1.76118e-23	2.05214	0.254	0.046	3.89854e-19	Proliferating	Cyp51
3.1483e-23	1.72546	0.311	0.065	6.96907e-19	Proliferating	Ruvbl2
3.4358e-23	1.872	0.295	0.06	7.60548e-19	Proliferating	Msh2
3.82646e-23	1.93863	0.27	0.052	8.47025e-19	Proliferating	Hdgfl3
6.09993e-23	1.50869	0.451	0.123	1.35028e-18	Proliferating	Hist1h4i
8.94146e-23	1.58396	0.5	0.157	1.97928e-18	Proliferating	Kmt5a
1.46665e-22	1.90636	0.295	0.062	3.24658e-18	Proliferating	Mthfd1l
1.53115e-22	1.8261	0.328	0.075	3.38935e-18	Proliferating	Med9
2.00224e-22	1.55351	0.82	0.477	4.43216e-18	Proliferating	Pcna
2.69824e-22	1.94682	0.295	0.063	5.97282e-18	Proliferating	Agfg2
3.02881e-22	1.53662	0.262	0.05	6.70457e-18	Proliferating	Cdca4
3.58652e-22	1.8359	0.303	0.066	7.93911e-18	Proliferating	Hmga1
4.07245e-22	1.5838	0.467	0.14	9.01477e-18	Proliferating	Mast2
4.62008e-22	1.61125	0.328	0.075	1.0227e-17	Proliferating	Jpt2
5.63533e-22	2.00791	0.287	0.061	1.24744e-17	Proliferating	Lrrc42
9.44149e-22	1.72206	0.287	0.062	2.08997e-17	Proliferating	Pakap.1
9.81283e-22	1.6213	0.393	0.105	2.17217e-17	Proliferating	Naa16
1.25799e-21	1.62503	0.434	0.129	2.78468e-17	Proliferating	Nudcd2
1.84738e-21	1.53798	0.328	0.076	4.08936e-17	Proliferating	Nup205
3.14361e-21	1.62803	0.795	0.409	6.9587e-17	Proliferating	Metap2
3.69254e-21	1.70106	0.32	0.074	8.17381e-17	Proliferating	Cstf2
4.14362e-21	1.96892	0.254	0.051	9.17231e-17	Proliferating	Ppat
6.30212e-21	1.67467	0.254	0.05	1.39504e-16	Proliferating	Pola2
8.5463e-21	1.62827	0.287	0.062	1.89181e-16	Proliferating	Ftx
1.31336e-20	1.60317	0.32	0.076	2.90726e-16	Proliferating	Cnot9
1.55681e-20	1.6152	0.254	0.051	3.44614e-16	Proliferating	Espl1
1.88552e-20	1.53248	0.32	0.076	4.17378e-16	Proliferating	Bclaf3
1.90888e-20	1.61241	0.295	0.067	4.2255e-16	Proliferating	Ndrg1
1.97638e-20	1.59218	0.262	0.054	4.37492e-16	Proliferating	Wee1
2.18494e-20	1.5234	0.262	0.054	4.83658e-16	Proliferating	Casp2
2.4452e-20	1.51444	0.418	0.121	5.41268e-16	Proliferating	Lta4h
2.96847e-20	1.51516	0.344	0.087	6.571e-16	Proliferating	Gins4
3.61536e-20	1.6599	0.336	0.086	8.00296e-16	Proliferating	Tfdp2
3.79044e-20	1.52133	0.402	0.111	8.39053e-16	Proliferating	Clpp
4.64341e-20	1.51575	0.254	0.051	1.02786e-15	Proliferating	Nup133
6.40343e-20	1.57152	0.557	0.198	1.41746e-15	Proliferating	Cnot6
7.80093e-20	1.5266	0.295	0.068	1.72681e-15	Proliferating	Nedd1
8.85957e-20	1.62223	0.361	0.096	1.96115e-15	Proliferating	Erg28
1.24455e-19	1.63962	0.311	0.075	2.75495e-15	Proliferating	Slf1
1.66763e-19	1.53111	0.369	0.1	3.69147e-15	Proliferating	Terf1
2.02055e-19	1.77283	0.287	0.066	4.47269e-15	Proliferating	Ttll5
2.64576e-19	1.64341	0.287	0.067	5.85666e-15	Proliferating	Alg13
5.90344e-19	2.16495	0.262	0.059	1.30679e-14	Proliferating	Acot7
6.68729e-19	1.52555	0.311	0.077	1.4803e-14	Proliferating	Ptrh2
1.13851e-18	1.50929	0.279	0.064	2.52021e-14	Proliferating	Pmm1
1.59753e-18	1.69254	0.262	0.058	3.53628e-14	Proliferating	Ctla4
1.74617e-18	1.59272	0.377	0.107	3.86533e-14	Proliferating	Mta1
4.25619e-18	1.62455	0.311	0.08	9.4215e-14	Proliferating	Inip
4.53984e-18	1.5264	0.787	0.436	1.00494e-13	Proliferating	Mif
2.2891e-17	1.61651	0.262	0.061	5.06716e-13	Proliferating	Dtnb
2.44143e-17	1.83442	0.27	0.065	5.40435e-13	Proliferating	Slc24a5
2.52422e-17	1.97058	0.287	0.073	5.58762e-13	Proliferating	Ift27
4.61394e-17	1.6354	0.27	0.066	1.02134e-12	Proliferating	Ddah2
5.36785e-17	1.60143	0.311	0.085	1.18823e-12	Proliferating	Slc35d1
5.42906e-17	1.58719	0.533	0.207	1.20178e-12	Proliferating	Prdx4
3.99922e-16	1.63325	0.336	0.1	8.85267e-12	Proliferating	Galk1
8.8858e-16	1.69666	0.279	0.073	1.96696e-11	Proliferating	Lrrc8b
2.055e-15	1.70862	0.254	0.066	4.54895e-11	Proliferating	Dpp4
1.14047e-14	1.50767	0.32	0.096	2.52455e-10	Proliferating	Mrpl22
1.19155e-14	1.52016	0.262	0.069	2.63762e-10	Proliferating	Mcph1
5.85454e-13	1.55491	0.32	0.103	1.29596e-08	Proliferating	Phpt1
3.30034e-190	2.10857	0.784	0.256	7.30564e-186	InflammatoryMacs	Cx3cr1
9.86748e-162	1.76274	0.881	0.422	2.18427e-157	InflammatoryMacs	Cxcl2
1.65031e-158	1.65346	0.917	0.506	3.65313e-154	InflammatoryMacs	Cd14
8.17214e-158	1.58372	0.944	0.569	1.80899e-153	InflammatoryMacs	Cd74
4.02162e-145	1.65736	0.856	0.435	8.90227e-141	InflammatoryMacs	H2-Eb1
8.92166e-144	2.20368	0.784	0.354	1.9749e-139	InflammatoryMacs	Ccl4
4.06494e-142	1.58752	0.827	0.378	8.99815e-138	InflammatoryMacs	Cxcl16
1.41162e-139	1.58406	0.878	0.474	3.12476e-135	InflammatoryMacs	H2-Ab1
9.71441e-139	1.54647	0.858	0.448	2.15038e-134	InflammatoryMacs	H2-Aa
5.8571e-137	1.68947	0.834	0.426	1.29653e-132	InflammatoryMacs	Bcl2a1b
2.11135e-131	1.53694	0.839	0.41	4.67368e-127	InflammatoryMacs	Ms4a7
1.35823e-129	1.78203	0.75	0.317	3.00657e-125	InflammatoryMacs	Ccl3
1.44366e-125	1.8087	0.647	0.223	3.19568e-121	InflammatoryMacs	Cd72
1.87142e-118	1.69881	0.677	0.269	4.14258e-114	InflammatoryMacs	Ccrl2
9.30204e-114	1.76233	0.649	0.254	2.0591e-109	InflammatoryMacs	Nlrp3
3.04858e-113	2.20119	0.448	0.11	6.74833e-109	InflammatoryMacs	Col14a1
8.53705e-113	1.71474	0.693	0.294	1.88976e-108	InflammatoryMacs	H2-DMb1
3.96307e-101	2.28982	0.426	0.112	8.77265e-97	InflammatoryMacs	Lilra5
6.76226e-96	1.68077	0.63	0.269	1.49689e-91	InflammatoryMacs	Tnf
3.31804e-86	1.7224	0.551	0.218	7.34482e-82	InflammatoryMacs	Phlda1
1.0269e-78	1.65079	0.509	0.197	2.27314e-74	InflammatoryMacs	Slamf9
1.08785e-76	1.50288	0.62	0.3	2.40807e-72	InflammatoryMacs	Clec12a
8.7083e-75	1.67836	0.492	0.194	1.92767e-70	InflammatoryMacs	Axl
1.73733e-73	1.81862	0.542	0.241	3.84576e-69	InflammatoryMacs	Glipr1
1.55908e-65	2.01008	0.362	0.118	3.45117e-61	InflammatoryMacs	Pdgfb
4.31329e-65	1.56734	0.477	0.2	9.54789e-61	InflammatoryMacs	Ntpcr
1.78909e-64	2.17278	0.291	0.077	3.96034e-60	InflammatoryMacs	Zmynd15
8.98575e-63	2.10878	0.346	0.112	1.98909e-58	InflammatoryMacs	Gm20513
1.24153e-55	2.10067	0.311	0.102	2.74826e-51	InflammatoryMacs	Scimp
8.25292e-55	1.92798	0.311	0.102	1.82687e-50	InflammatoryMacs	Bcl2a1a
2.1083e-54	1.5768	0.358	0.127	4.66693e-50	InflammatoryMacs	Tnip3
7.12273e-49	1.56844	0.335	0.123	1.57669e-44	InflammatoryMacs	Itga6
4.67974e-46	1.66932	0.287	0.097	1.03591e-41	InflammatoryMacs	Fcgr4
1.74784e-45	1.9757	0.277	0.094	3.86902e-41	InflammatoryMacs	F11r
6.1796e-41	1.66493	0.348	0.15	1.36792e-36	InflammatoryMacs	Tnfsf9
3.80895e-39	1.63764	0.274	0.1	8.43149e-35	InflammatoryMacs	Gm35154
2.42195e-32	1.73935	0.276	0.117	5.36124e-28	InflammatoryMacs	Sowahc
3.49112e-131	5.39546	0.564	0.08	7.72794e-127	Trem2Macs	Spp1
1.21416e-124	3.58654	0.488	0.059	2.68767e-120	Trem2Macs	Syngr1
1.06063e-94	2.37208	0.896	0.382	2.3478e-90	Trem2Macs	Trem2
1.78641e-94	2.75235	0.96	0.518	3.95439e-90	Trem2Macs	Lgals3
2.45389e-94	3.00953	0.504	0.087	5.43194e-90	Trem2Macs	Apbb2
4.80523e-93	2.14254	0.908	0.351	1.06368e-88	Trem2Macs	Cd9
3.17227e-87	3.58257	0.316	0.033	7.02214e-83	Trem2Macs	Gpnmb
1.69388e-84	3.38668	0.268	0.023	3.74958e-80	Trem2Macs	Cdk18
1.17747e-76	3.01902	0.416	0.069	2.60645e-72	Trem2Macs	Mmp12
7.88017e-75	1.69685	0.9	0.375	1.74435e-70	Trem2Macs	Basp1
3.87248e-74	3.2748	0.48	0.1	8.57212e-70	Trem2Macs	Lpl
2.20817e-70	1.87074	0.856	0.366	4.88801e-66	Trem2Macs	Capg
2.55554e-64	1.89717	0.828	0.372	5.65695e-60	Trem2Macs	Aprt
4.72357e-64	1.78432	0.916	0.466	1.04561e-59	Trem2Macs	Ms4a7
1.67487e-62	1.75613	0.696	0.227	3.70749e-58	Trem2Macs	Lat2
6.77806e-62	2.42037	0.332	0.053	1.50039e-57	Trem2Macs	Lhfpl2
2.14399e-61	2.03808	0.724	0.278	4.74594e-57	Trem2Macs	Cd72
1.40145e-60	3.0198	0.344	0.06	3.10224e-56	Trem2Macs	Nes
1.44858e-59	1.76886	0.66	0.216	3.20658e-55	Trem2Macs	Gpr137b
9.89156e-58	1.81987	0.664	0.233	2.18959e-53	Trem2Macs	Gngt2
1.65461e-54	1.77364	0.972	0.769	3.66264e-50	Trem2Macs	Prdx1
1.51231e-53	2.41034	0.34	0.063	3.34764e-49	Trem2Macs	Olfml3
3.36928e-53	1.54844	0.7	0.252	7.45824e-49	Trem2Macs	Anxa4
5.47839e-52	1.50175	0.888	0.485	1.2127e-47	Trem2Macs	Cd68
2.19935e-51	1.56329	0.712	0.273	4.86849e-47	Trem2Macs	Glipr1
3.87542e-51	1.98463	0.744	0.321	8.57864e-47	Trem2Macs	Anxa1
9.98059e-51	2.9121	0.276	0.046	2.2093e-46	Trem2Macs	Anpep
5.34755e-48	1.62751	0.744	0.328	1.18373e-43	Trem2Macs	Rnh1
5.55766e-48	2.26536	0.416	0.106	1.23024e-43	Trem2Macs	AA467197
2.2875e-45	3.19234	0.38	0.1	5.06362e-41	Trem2Macs	Fabp5
4.19298e-45	1.78461	0.592	0.21	9.28157e-41	Trem2Macs	Rhoc
9.76068e-44	1.6271	0.552	0.186	2.16063e-39	Trem2Macs	Cadm1
1.00201e-43	1.57584	0.508	0.154	2.21806e-39	Trem2Macs	Arhgap24
4.58065e-43	2.49808	0.272	0.051	1.01397e-38	Trem2Macs	St18
1.10031e-42	1.61255	0.428	0.114	2.43564e-38	Trem2Macs	Arl11
8.79738e-42	1.88841	0.448	0.132	1.94739e-37	Trem2Macs	Gde1
6.71752e-41	1.63243	0.72	0.346	1.48699e-36	Trem2Macs	Lipa
2.21885e-39	1.76384	0.464	0.146	4.91165e-35	Trem2Macs	Pdgfb
4.45562e-38	1.95501	0.376	0.103	9.86296e-34	Trem2Macs	Itgax
2.22543e-34	1.97498	0.288	0.069	4.92622e-30	Trem2Macs	Adam8
5.67643e-34	1.74557	0.32	0.082	1.25654e-29	Trem2Macs	Ldlrap1
6.75143e-34	1.53301	0.652	0.286	1.4945e-29	Trem2Macs	S100a1
1.29186e-33	1.58909	0.452	0.151	2.85966e-29	Trem2Macs	2510009E07Rik
4.57698e-32	1.62583	0.356	0.103	1.01316e-27	Trem2Macs	Zmynd15
1.88797e-31	1.9819	0.3	0.08	4.17921e-27	Trem2Macs	Serpine1
2.29741e-31	1.63755	0.408	0.134	5.08555e-27	Trem2Macs	Mmp14
7.15576e-31	1.85191	0.336	0.098	1.584e-26	Trem2Macs	Apoc2
2.01666e-30	1.64967	0.408	0.138	4.46407e-26	Trem2Macs	Pik3cb
1.24111e-29	1.59047	0.456	0.171	2.74732e-25	Trem2Macs	Gdf15
1.68941e-29	1.50797	0.608	0.277	3.73968e-25	Trem2Macs	Sgk1
1.73043e-29	1.97316	0.348	0.108	3.83049e-25	Trem2Macs	Pdgfa
1.45807e-28	1.64351	0.872	0.651	3.22758e-24	Trem2Macs	Ctsd
1.02507e-27	1.55644	0.276	0.072	2.26909e-23	Trem2Macs	Sh2d1b1
1.81693e-27	1.51972	0.384	0.131	4.02195e-23	Trem2Macs	Map4k3
8.80074e-27	1.67486	0.252	0.064	1.94813e-22	Trem2Macs	Hgf
2.94114e-23	2.2872	0.788	0.471	6.51052e-19	Trem2Macs	Ctsl
3.74731e-23	1.69655	0.284	0.089	8.29504e-19	Trem2Macs	Hebp1
1.29423e-21	1.56276	0.264	0.081	2.86491e-17	Trem2Macs	Lrp12
1.11747e-19	2.07174	0.268	0.091	2.47364e-15	Trem2Macs	Fbxo32
1.52178e-19	1.58729	0.272	0.091	3.36862e-15	Trem2Macs	Fgf13
3.91158e-17	1.54327	0.292	0.111	8.65867e-13	Trem2Macs	Eepd1
3.92792e-06	1.87499	0.288	0.168	0.0869485	Trem2Macs	Mfge8
0	8.57901	0.494	0.003	0	cDC1	Clec9a
0	8.98116	0.436	0.001	0	cDC1	Sept3
0	9.51515	0.423	0.001	0	cDC1	Xcr1
5.68347e-298	6.13842	0.506	0.009	1.25809e-293	cDC1	Ccser1
2.4553e-278	7.80054	0.34	0.001	5.43505e-274	cDC1	Gcsam
1.8549e-254	5.98905	0.481	0.011	4.10602e-250	cDC1	Htr7
9.23322e-248	4.95575	0.487	0.012	2.04387e-243	cDC1	Ifi205
1.17635e-238	4.51032	0.635	0.03	2.60396e-234	cDC1	Flt3
1.35917e-226	4.9895	0.532	0.02	3.00865e-222	cDC1	Hepacam2
5.64818e-224	5.4753	0.41	0.009	1.25028e-219	cDC1	Itgae
1.6618e-220	7.14621	0.295	0.002	3.67856e-216	cDC1	Gpr141b
1.76084e-203	5.56224	0.404	0.01	3.89779e-199	cDC1	Klri1
6.05509e-192	6.30368	0.276	0.002	1.34035e-187	cDC1	Cldn1
2.83242e-173	3.38372	0.346	0.009	6.26985e-169	cDC1	Kit
2.6419e-172	4.31864	0.494	0.026	5.84811e-168	cDC1	Klrb1b
2.56086e-149	3.27581	0.564	0.043	5.66872e-145	cDC1	H2-Oa
1.8131e-148	3.42076	0.423	0.021	4.01349e-144	cDC1	Gm36723
2.53615e-138	4.06328	0.282	0.008	5.61403e-134	cDC1	Frmd5
2.23193e-137	4.30617	0.295	0.009	4.94059e-133	cDC1	5730522E02Rik
3.73856e-132	3.28179	0.635	0.066	8.27568e-128	cDC1	Rnase6
4.68301e-130	3.04956	0.558	0.048	1.03663e-125	cDC1	Btla
2.34947e-120	3.90501	0.558	0.057	5.20079e-116	cDC1	Lrrk2
1.22179e-115	2.55023	0.596	0.064	2.70456e-111	cDC1	H2-Ob
1.18636e-109	2.52029	0.276	0.011	2.62613e-105	cDC1	Clnk
4.84009e-105	3.7328	0.288	0.014	1.0714e-100	cDC1	Strip2
8.10213e-104	3.57169	0.442	0.039	1.79349e-99	cDC1	Tlr3
3.25031e-103	2.45068	0.519	0.053	7.19488e-99	cDC1	Dpp4
1.08993e-102	3.30236	0.814	0.186	2.41268e-98	cDC1	Plbd1
3.40858e-98	2.34732	0.782	0.141	7.54524e-94	cDC1	Napsa
3.93567e-98	3.67931	0.288	0.015	8.71201e-94	cDC1	Pianp
1.12159e-97	3.40861	0.429	0.039	2.48276e-93	cDC1	Tnni2
4.10433e-94	3.34861	0.513	0.062	9.08535e-90	cDC1	Tbc1d8
4.99704e-94	2.61184	0.609	0.086	1.10615e-89	cDC1	Rab11fip1
8.70324e-83	2.39558	0.41	0.041	1.92655e-78	cDC1	Ap1s3
3.13882e-82	3.57123	0.276	0.017	6.9481e-78	cDC1	Tspan33
6.51084e-82	3.31772	0.288	0.02	1.44124e-77	cDC1	Dnase1l3
1.08941e-80	2.78424	0.756	0.174	2.41152e-76	cDC1	Pkib
3.51845e-80	1.91445	0.596	0.092	7.78843e-76	cDC1	Cd24a
4.02267e-80	2.11236	0.635	0.104	8.90459e-76	cDC1	P2ry10
6.52178e-80	2.25914	0.654	0.114	1.44366e-75	cDC1	Itgb7
3.73721e-74	2.38578	0.917	0.32	8.27269e-70	cDC1	Cytip
5.08161e-74	2.277	0.404	0.046	1.12487e-69	cDC1	Cd244a
3.75785e-72	2.94004	0.724	0.188	8.31839e-68	cDC1	Wdfy4
4.81158e-72	2.36282	0.494	0.072	1.06509e-67	cDC1	Bri3bp
1.01192e-70	2.55641	0.34	0.033	2.23998e-66	cDC1	Bcl11a
1.75046e-70	2.37141	0.282	0.023	3.87481e-66	cDC1	Dhrs9
2.49923e-69	2.56418	0.487	0.074	5.53229e-65	cDC1	Qpct
1.24311e-68	2.14463	0.654	0.133	2.75174e-64	cDC1	Cbfa2t3
2.28172e-65	3.02099	0.397	0.053	5.05082e-61	cDC1	P2ry14
5.64067e-65	2.32223	0.897	0.353	1.24862e-60	cDC1	Gng10
1.63942e-64	3.00453	0.449	0.068	3.62903e-60	cDC1	Grasp
1.82958e-64	2.73311	0.571	0.111	4.04995e-60	cDC1	Slc25a20
3.97279e-64	2.32198	0.41	0.055	8.79416e-60	cDC1	H2-DMb2
1.84874e-63	2.32791	0.5	0.083	4.09237e-59	cDC1	St3gal5
3.22389e-63	2.86005	0.404	0.055	7.13641e-59	cDC1	Chsy3
4.27566e-63	2.16702	0.333	0.037	9.4646e-59	cDC1	Il1r2
5.06249e-63	2.34677	0.429	0.061	1.12063e-58	cDC1	Tiam1
3.33683e-61	3.52933	0.276	0.026	7.38641e-57	cDC1	Lmo1
3.71069e-61	3.29982	0.686	0.21	8.21398e-57	cDC1	Naaa
6.69937e-61	1.91744	0.955	0.5	1.48297e-56	cDC1	H2-Eb1
2.1023e-60	1.96233	0.955	0.537	4.65364e-56	cDC1	H2-Ab1
6.21193e-60	2.2925	0.571	0.114	1.37507e-55	cDC1	Olfm1
9.01449e-60	2.35516	0.885	0.407	1.99545e-55	cDC1	Gm2a
3.01764e-59	2.04538	0.91	0.408	6.67985e-55	cDC1	H2-DMa
3.67249e-59	1.8504	0.468	0.074	8.12943e-55	cDC1	Jaml
1.02155e-58	2.50962	0.705	0.191	2.2613e-54	cDC1	Phlpp1
1.9345e-58	2.15479	0.583	0.121	4.28221e-54	cDC1	Avpi1
5.83672e-58	1.94482	0.891	0.351	1.29202e-53	cDC1	H2-DMb1
3.60724e-56	2.9819	0.301	0.034	7.98499e-52	cDC1	Ly75
9.53962e-56	2.40667	0.647	0.166	2.11169e-51	cDC1	Havcr2
2.95275e-54	1.69463	0.955	0.511	6.5362e-50	cDC1	H2-Aa
5.07335e-54	2.6741	0.333	0.044	1.12304e-49	cDC1	Dna2
5.37323e-54	2.31849	0.519	0.108	1.18942e-49	cDC1	Gcnt2
2.90952e-53	2.29672	0.532	0.11	6.4405e-49	cDC1	Ppm1m
6.95979e-53	2.53076	0.987	0.868	1.54062e-48	cDC1	Cst3
1.09557e-52	1.9193	0.506	0.098	2.42516e-48	cDC1	Batf3
1.13458e-51	2.21922	0.397	0.063	2.51152e-47	cDC1	Ece1
5.00135e-51	1.94449	0.564	0.123	1.1071e-46	cDC1	Ciita
2.21176e-50	2.40936	0.519	0.113	4.89595e-46	cDC1	P3h2
2.89687e-49	2.36924	0.468	0.092	6.4125e-45	cDC1	Rtl8a
1.12611e-48	1.61537	0.962	0.63	2.49276e-44	cDC1	Cd74
1.27843e-47	1.92084	0.724	0.228	2.82993e-43	cDC1	Dapp1
2.65717e-47	2.3021	0.41	0.074	5.8819e-43	cDC1	Gpr171
1.25456e-46	2.45275	0.494	0.112	2.77709e-42	cDC1	Ahr
1.96234e-46	1.88953	0.545	0.126	4.34384e-42	cDC1	Bcl2a1a
6.0219e-46	2.11674	0.391	0.069	1.33301e-41	cDC1	Gfod1
2.2336e-45	2.01655	0.622	0.175	4.9443e-41	cDC1	Naga
5.26491e-45	2.34314	0.359	0.06	1.16544e-40	cDC1	Srgap3
9.59342e-45	2.2238	0.397	0.073	2.1236e-40	cDC1	Ppfibp2
1.01386e-44	1.60901	0.929	0.483	2.24428e-40	cDC1	Lsp1
1.02076e-44	2.06155	0.327	0.049	2.25956e-40	cDC1	Anpep
1.1551e-44	2.333	0.615	0.192	2.55692e-40	cDC1	Cadm1
5.28642e-44	2.27248	0.282	0.038	1.1702e-39	cDC1	Zbtb46
1.26949e-43	2.27944	0.5	0.118	2.81014e-39	cDC1	Erlin1
5.69421e-43	1.60962	0.833	0.308	1.26047e-38	cDC1	Syngr2
4.76772e-41	2.16809	0.647	0.228	1.05538e-36	cDC1	BC028528
9.2349e-41	1.72985	0.84	0.397	2.04424e-36	cDC1	Ckb
1.08792e-40	1.92157	0.571	0.157	2.40822e-36	cDC1	Trim35
4.37917e-40	2.1046	0.25	0.032	9.69373e-36	cDC1	Ryr1
4.73716e-40	1.71991	0.763	0.289	1.04862e-35	cDC1	Rab43
6.2175e-40	1.6165	0.769	0.285	1.37631e-35	cDC1	Psmb9
4.50196e-39	1.72689	0.577	0.162	9.96553e-35	cDC1	Pak1
6.66117e-39	1.89838	0.705	0.24	1.47452e-34	cDC1	Pmaip1
1.72735e-38	2.03317	0.314	0.053	3.82367e-34	cDC1	Cystm1
2.59021e-38	1.51638	0.968	0.819	5.73369e-34	cDC1	H2afz
2.97672e-38	2.23987	0.308	0.051	6.58926e-34	cDC1	Nectin1
4.68679e-38	2.12491	0.359	0.068	1.03747e-33	cDC1	Plpp1
4.87011e-38	1.68297	0.532	0.138	1.07805e-33	cDC1	Aph1c
8.36864e-38	1.665	0.462	0.107	1.85248e-33	cDC1	Egr3
1.56745e-37	1.94944	0.647	0.217	3.46972e-33	cDC1	Jak2
2.47211e-37	1.78378	0.551	0.152	5.47225e-33	cDC1	Unc119
3.92107e-37	1.59671	0.577	0.164	8.67967e-33	cDC1	Sp140
6.83458e-37	1.79868	0.333	0.06	1.5129e-32	cDC1	Slc9a7
2.31527e-36	1.62063	0.276	0.043	5.12508e-32	cDC1	Gpr141
3.09808e-36	1.88114	0.481	0.122	6.85791e-32	cDC1	Gpd2
1.35076e-35	1.57114	0.596	0.181	2.99004e-31	cDC1	Txndc15
1.62605e-35	1.61133	0.359	0.072	3.59943e-31	cDC1	Adam8
1.39589e-34	2.24398	0.25	0.037	3.08995e-30	cDC1	Fndc7
1.42233e-34	1.7952	0.256	0.039	3.14846e-30	cDC1	Gpr68
5.1327e-34	1.52063	0.513	0.139	1.13617e-29	cDC1	1700025G04Rik
5.23526e-34	2.05677	0.712	0.33	1.15888e-29	cDC1	Irf8
5.31488e-34	2.34213	0.346	0.072	1.1765e-29	cDC1	Rtl8b
5.86014e-34	1.86011	0.359	0.075	1.2972e-29	cDC1	Grk3
1.86998e-33	1.67024	0.474	0.122	4.13939e-29	cDC1	Ildr1
8.43735e-33	1.71949	0.385	0.089	1.86769e-28	cDC1	Dock5
4.7503e-32	2.12202	0.301	0.057	1.05153e-27	cDC1	Net1
5.18469e-32	2.23077	0.333	0.068	1.14768e-27	cDC1	Timd4
1.43501e-31	1.77479	0.308	0.059	3.17653e-27	cDC1	Amz1
1.67983e-31	1.61703	0.353	0.075	3.71846e-27	cDC1	Hmgn3
4.77671e-31	2.00733	0.301	0.058	1.05737e-26	cDC1	Gm36486
5.94827e-31	1.54076	0.429	0.108	1.31671e-26	cDC1	Pafah1b3
2.88447e-30	1.88162	0.718	0.315	6.38506e-26	cDC1	Antxr2
1.51511e-29	1.62655	0.449	0.121	3.35384e-25	cDC1	Tent5c
1.46188e-28	1.72537	0.269	0.05	3.23601e-24	cDC1	Kmo
1.71214e-28	1.55956	0.333	0.073	3.79e-24	cDC1	C130026I21Rik
8.99361e-28	1.80753	0.603	0.23	1.99082e-23	cDC1	Ncoa7
1.79529e-27	1.82022	0.34	0.081	3.97405e-23	cDC1	Rtn1
5.28023e-27	1.90302	0.705	0.384	1.16883e-22	cDC1	Ppt1
1.93111e-26	2.06198	0.25	0.048	4.2747e-22	cDC1	1700016P03Rik
1.42398e-25	1.57331	0.276	0.057	3.15212e-21	cDC1	Pnpo
1.72297e-25	1.65301	0.494	0.16	3.81396e-21	cDC1	Csf2rb
3.10277e-25	1.62858	0.404	0.114	6.86829e-21	cDC1	Fgfr1op
4.01029e-24	1.8442	0.545	0.192	8.87718e-20	cDC1	Tbc1d4
7.8783e-24	1.59486	0.391	0.113	1.74394e-19	cDC1	Cmtr1
7.72609e-23	1.83731	0.263	0.059	1.71025e-18	cDC1	Polr1a
2.81416e-22	1.74801	0.269	0.062	6.22942e-18	cDC1	Lsr
1.22139e-21	1.6747	0.314	0.083	2.70368e-17	cDC1	Clec4b1
1.95714e-14	2.71326	0.333	0.124	4.33232e-10	cDC1	Txndc16
9.9555e-13	2.04871	0.314	0.118	2.20375e-08	cDC1	Rrad
0	4.97776	0.945	0.051	0	CD8Tcells	Ms4a4b
0	3.6269	0.925	0.095	0	CD8Tcells	Cd3g
0	5.80525	0.853	0.03	0	CD8Tcells	Nkg7
0	5.62043	0.836	0.039	0	CD8Tcells	Ccl5
0	4.20214	0.818	0.061	0	CD8Tcells	Trac
0	4.45324	0.791	0.035	0	CD8Tcells	Gm2682
0	5.53982	0.685	0.025	0	CD8Tcells	Ctsw
1.63881e-306	4.2537	0.63	0.031	3.62766e-302	CD8Tcells	Cxcr6
8.70684e-299	3.46481	0.894	0.096	1.92735e-294	CD8Tcells	Cd3d
9.52173e-287	5.60396	0.503	0.017	2.10773e-282	CD8Tcells	Klrc1
8.42867e-285	3.0662	0.904	0.101	1.86577e-280	CD8Tcells	Skap1
4.36616e-282	2.65243	0.904	0.099	9.66493e-278	CD8Tcells	Trbc2
6.35902e-278	4.12448	0.651	0.043	1.40763e-273	CD8Tcells	Icos
1.12622e-261	2.9913	0.829	0.09	2.493e-257	CD8Tcells	Itk
1.01165e-258	4.00781	0.688	0.059	2.23939e-254	CD8Tcells	Gimap4
3.71415e-251	4.34177	0.606	0.043	8.22164e-247	CD8Tcells	Ly6c2
1.27511e-249	2.43387	0.784	0.081	2.82258e-245	CD8Tcells	Themis
4.24687e-248	3.30724	0.801	0.09	9.40088e-244	CD8Tcells	Cd3e
1.50773e-237	4.19001	0.733	0.088	3.33752e-233	CD8Tcells	Ctla2a
5.05377e-233	3.55954	0.654	0.059	1.1187e-228	CD8Tcells	Cd8b1
6.55491e-228	3.6528	0.716	0.081	1.451e-223	CD8Tcells	Cd2
9.74954e-227	3.94293	0.911	0.199	2.15816e-222	CD8Tcells	AW112010
3.11038e-218	3.96436	0.627	0.06	6.88514e-214	CD8Tcells	Gimap3
1.09674e-211	4.23059	0.592	0.055	2.42775e-207	CD8Tcells	Cd226
2.28728e-208	3.60517	0.616	0.059	5.06312e-204	CD8Tcells	Cd28
7.76855e-208	3.15762	0.671	0.073	1.71965e-203	CD8Tcells	Lck
1.91491e-205	5.46953	0.346	0.009	4.23884e-201	CD8Tcells	Gzmk
5.63322e-203	5.10081	0.373	0.013	1.24697e-198	CD8Tcells	Fasl
1.38566e-200	4.18958	0.538	0.045	3.0673e-196	CD8Tcells	Sh2d2a
1.79514e-197	4.24323	0.545	0.049	3.97372e-193	CD8Tcells	Klrk1
4.38253e-192	3.56478	0.935	0.28	9.70117e-188	CD8Tcells	Hcst
4.77483e-187	3.60901	0.545	0.051	1.05696e-182	CD8Tcells	Il18r1
1.11769e-186	4.24919	0.438	0.028	2.47413e-182	CD8Tcells	Il2rb
2.36012e-186	5.72577	0.329	0.011	5.22436e-182	CD8Tcells	Ifng
7.46787e-183	3.07635	0.74	0.115	1.65309e-178	CD8Tcells	Ptprcap
1.27728e-181	3.08633	0.634	0.076	2.82738e-177	CD8Tcells	Lat
3.2765e-177	4.53252	0.408	0.025	7.25286e-173	CD8Tcells	Abcb1a
1.88016e-171	3.21876	0.579	0.067	4.16192e-167	CD8Tcells	Thy1
4.96185e-171	4.2027	0.514	0.052	1.09836e-166	CD8Tcells	Klrd1
1.1052e-169	3.76181	0.644	0.098	2.44647e-165	CD8Tcells	Hopx
5.15042e-169	3.54031	0.818	0.2	1.1401e-164	CD8Tcells	Ptpn22
2.34985e-168	3.41754	0.747	0.147	5.20162e-164	CD8Tcells	Gramd3
1.74307e-165	5.09126	0.288	0.009	3.85847e-161	CD8Tcells	Gzmb
4.85527e-161	3.29443	0.712	0.129	1.07476e-156	CD8Tcells	Stat4
4.99113e-161	3.27276	0.853	0.244	1.10484e-156	CD8Tcells	H2-Q7
1.76468e-151	2.55528	1	0.573	3.90629e-147	CD8Tcells	Tmsb10
4.68923e-151	3.10916	0.664	0.114	1.03801e-146	CD8Tcells	Sept1
4.30952e-148	3.51289	0.493	0.056	9.53955e-144	CD8Tcells	Gimap5
2.82031e-139	5.06091	0.274	0.012	6.24305e-135	CD8Tcells	Klrc2
2.9998e-138	2.67763	0.671	0.124	6.64035e-134	CD8Tcells	Gimap6
9.75193e-137	2.88323	0.671	0.134	2.15869e-132	CD8Tcells	Grap2
1.43662e-136	3.01904	0.449	0.047	3.1801e-132	CD8Tcells	Cd8a
1.51389e-134	2.56218	0.507	0.063	3.35116e-130	CD8Tcells	Trbc1
5.79591e-134	2.52852	0.736	0.164	1.28298e-129	CD8Tcells	Ets1
1.66896e-133	4.39125	0.322	0.021	3.69441e-129	CD8Tcells	Gm19585
7.12249e-129	1.71938	0.99	0.883	1.57663e-124	CD8Tcells	H2-K1
9.75865e-126	3.86311	0.353	0.03	2.16018e-121	CD8Tcells	Cd5
6.9026e-125	2.04077	0.993	0.65	1.52796e-120	CD8Tcells	Cd52
7.19907e-122	4.4241	0.295	0.019	1.59359e-117	CD8Tcells	Tbx21
2.80147e-121	3.94489	0.346	0.03	6.20133e-117	CD8Tcells	Gimap7
5.61653e-119	2.49881	0.568	0.096	1.24327e-114	CD8Tcells	Ikzf3
1.44801e-117	3.89035	0.322	0.026	3.20532e-113	CD8Tcells	Cd6
3.68873e-117	3.38521	0.462	0.065	8.16538e-113	CD8Tcells	Gimap1
1.0346e-116	2.84142	0.558	0.097	2.29018e-112	CD8Tcells	Ltb
1.10857e-114	2.97371	0.514	0.085	2.45393e-110	CD8Tcells	Ly6a
3.68823e-113	2.29452	0.911	0.475	8.16426e-109	CD8Tcells	Rac2
4.03736e-113	4.56951	0.284	0.02	8.93711e-109	CD8Tcells	Nmnat2
1.01707e-108	3.83988	0.336	0.033	2.25138e-104	CD8Tcells	Rundc3b
1.07131e-108	3.72595	0.366	0.041	2.37144e-104	CD8Tcells	Ctla4
4.60159e-108	3.86281	0.322	0.03	1.01861e-103	CD8Tcells	Klk8
5.8408e-107	3.58415	0.401	0.053	1.29292e-102	CD8Tcells	Cxcr3
1.10172e-104	2.96484	0.452	0.069	2.43876e-100	CD8Tcells	Gm8369
1.27203e-104	3.12305	0.408	0.054	2.81576e-100	CD8Tcells	Rnf125
8.6618e-104	4.13991	0.253	0.016	1.91738e-99	CD8Tcells	Pdcd1
1.26462e-97	2.76254	0.418	0.061	2.79936e-93	CD8Tcells	St6galnac3
3.30799e-97	2.03454	0.462	0.073	7.32257e-93	CD8Tcells	Bcl11b
6.12423e-96	3.01826	0.401	0.057	1.35566e-91	CD8Tcells	Prkcq
1.04361e-95	4.01404	0.295	0.029	2.31014e-91	CD8Tcells	Gm15472
3.38907e-95	2.46023	0.729	0.25	7.50206e-91	CD8Tcells	Vps37b
1.88058e-94	2.06245	0.476	0.081	4.16286e-90	CD8Tcells	Cd247
8.55896e-91	3.22243	0.411	0.067	1.89461e-86	CD8Tcells	Tbc1d10c
1.38678e-90	1.59396	0.49	0.086	3.06977e-86	CD8Tcells	Camk4
2.61518e-90	3.83507	0.373	0.056	5.78897e-86	CD8Tcells	Serpinb9
3.99883e-90	4.05427	0.264	0.023	8.85182e-86	CD8Tcells	Il12rb2
3.94753e-89	2.96801	0.432	0.075	8.73825e-85	CD8Tcells	BE692007
1.30365e-86	2.94907	0.332	0.042	2.88575e-82	CD8Tcells	Sh2d1a
1.31772e-86	2.71075	0.675	0.229	2.91692e-82	CD8Tcells	Dusp2
6.92501e-85	2.23662	0.527	0.116	1.53292e-80	CD8Tcells	Ablim1
2.0442e-84	2.57557	0.428	0.075	4.52504e-80	CD8Tcells	Tox
3.24227e-80	2.92348	0.568	0.165	7.1771e-76	CD8Tcells	Pde7a
1.11009e-77	3.50391	0.312	0.043	2.4573e-73	CD8Tcells	Tnfrsf18
2.69989e-77	2.30145	0.627	0.203	5.97647e-73	CD8Tcells	Dusp5
9.34846e-77	2.34532	0.469	0.099	2.06937e-72	CD8Tcells	Ppp1r16b
2.83275e-76	2.25775	0.401	0.07	6.27058e-72	CD8Tcells	Txk
5.77783e-76	3.38483	0.274	0.032	1.27898e-71	CD8Tcells	Sytl3
6.64157e-74	2.79634	0.462	0.109	1.47018e-69	CD8Tcells	Itgb7
1.57227e-73	3.31909	0.284	0.036	3.48037e-69	CD8Tcells	Lax1
7.02577e-73	3.24385	0.267	0.032	1.55522e-68	CD8Tcells	Zap70
1.30008e-72	2.38928	0.658	0.247	2.87786e-68	CD8Tcells	Emb
2.32748e-72	3.15038	0.295	0.04	5.15211e-68	CD8Tcells	Gimap8
2.67472e-70	2.48248	0.346	0.058	5.92075e-66	CD8Tcells	Cd27
1.50746e-69	2.09224	0.767	0.416	3.33692e-65	CD8Tcells	Epsti1
5.34333e-69	2.58205	0.517	0.151	1.1828e-64	CD8Tcells	H2-Q6
3.24113e-68	2.94892	0.342	0.061	7.17456e-64	CD8Tcells	Mctp2
1.4697e-67	2.28278	0.705	0.349	3.25334e-63	CD8Tcells	Dnajc15
2.81208e-67	2.01159	0.726	0.339	6.22482e-63	CD8Tcells	Pdcd4
4.23265e-67	2.61762	0.432	0.1	9.3694e-63	CD8Tcells	P2ry10
4.48336e-67	1.86434	0.815	0.505	9.92437e-63	CD8Tcells	Shisa5
6.45437e-66	1.6697	0.829	0.516	1.42874e-61	CD8Tcells	Psmb8
7.28335e-66	2.28605	0.462	0.116	1.61224e-61	CD8Tcells	Itgal
7.65458e-66	2.53161	0.596	0.226	1.69442e-61	CD8Tcells	Prkch
3.99276e-65	2.36929	0.678	0.301	8.83838e-61	CD8Tcells	Inpp4b
1.79577e-63	2.15511	0.514	0.146	3.97512e-59	CD8Tcells	Il7r
3.22524e-63	2.86061	0.312	0.053	7.13939e-59	CD8Tcells	Gimap9
2.11061e-62	3.19641	0.315	0.056	4.67206e-58	CD8Tcells	Sntb1
2.2748e-61	2.89794	0.295	0.048	5.0355e-57	CD8Tcells	Il18rap
1.24323e-60	2.49335	0.572	0.214	2.75202e-56	CD8Tcells	Cblb
1.90414e-58	3.45465	0.257	0.039	4.21501e-54	CD8Tcells	Gm20275
5.1935e-58	2.38648	0.541	0.184	1.14963e-53	CD8Tcells	Bhlhe40
5.6634e-58	3.67308	0.342	0.075	1.25365e-53	CD8Tcells	Itga1
2.07115e-56	2.59048	0.308	0.057	4.5847e-52	CD8Tcells	Plcxd2
8.35792e-56	1.86762	0.702	0.367	1.85011e-51	CD8Tcells	Selplg
8.64469e-56	1.61489	0.829	0.644	1.91359e-51	CD8Tcells	Ifngr1
1.40402e-55	2.31849	0.497	0.161	3.10794e-51	CD8Tcells	Prkca
2.20028e-55	3.06556	0.291	0.054	4.87053e-51	CD8Tcells	Ccdc88c
6.8132e-55	2.40567	0.548	0.212	1.50817e-50	CD8Tcells	Rnf138
1.39126e-54	3.28676	0.295	0.057	3.07969e-50	CD8Tcells	Slc25a40
1.02984e-51	2.84513	0.346	0.083	2.27965e-47	CD8Tcells	Rasal3
6.99412e-51	3.06563	0.257	0.045	1.54822e-46	CD8Tcells	Stk26
2.29111e-50	3.18426	0.25	0.043	5.07159e-46	CD8Tcells	Fam189b
3.31352e-50	2.37124	0.274	0.05	7.33481e-46	CD8Tcells	Fam169b
3.60276e-50	2.48168	0.418	0.12	7.97507e-46	CD8Tcells	Cd69
7.28013e-50	2.06821	0.438	0.131	1.61153e-45	CD8Tcells	Arap2
3.07247e-49	1.93737	0.644	0.315	6.80121e-45	CD8Tcells	Itga4
4.82709e-49	2.0385	0.596	0.273	1.06853e-44	CD8Tcells	Fyn
1.07339e-48	2.66211	0.26	0.047	2.37607e-44	CD8Tcells	Jakmip1
7.44524e-48	2.56064	0.455	0.161	1.64808e-43	CD8Tcells	Smad7
2.91846e-46	2.68542	0.373	0.107	6.4603e-42	CD8Tcells	Rinl
6.00219e-46	2.54166	0.329	0.081	1.32864e-41	CD8Tcells	Glipr2
7.92214e-45	1.59495	0.76	0.488	1.75364e-40	CD8Tcells	Tnfaip3
8.12429e-45	2.18429	0.312	0.072	1.79839e-40	CD8Tcells	Tnik
1.73292e-44	2.49996	0.435	0.152	3.836e-40	CD8Tcells	B4galnt1
5.80127e-44	3.01292	0.26	0.054	1.28417e-39	CD8Tcells	Pkp3
1.09723e-43	1.81871	0.664	0.375	2.42883e-39	CD8Tcells	Atxn1
1.819e-43	2.39682	0.503	0.209	4.02655e-39	CD8Tcells	Rora
2.59811e-43	2.06866	0.616	0.315	5.75118e-39	CD8Tcells	Gpr183
3.53054e-43	1.71607	0.692	0.429	7.81521e-39	CD8Tcells	Saraf
8.99127e-42	2.37031	0.408	0.137	1.99031e-37	CD8Tcells	D16Ertd472e
4.66026e-41	2.58764	0.318	0.085	1.03159e-36	CD8Tcells	Runx2
5.74844e-41	1.66826	0.589	0.281	1.27248e-36	CD8Tcells	Nabp1
1.20172e-40	1.86147	0.592	0.315	2.66013e-36	CD8Tcells	Leprotl1
3.09322e-40	2.28598	0.514	0.236	6.84716e-36	CD8Tcells	Runx3
9.53474e-40	2.02176	0.428	0.153	2.11061e-35	CD8Tcells	Mllt3
4.05075e-39	1.73536	0.603	0.321	8.96673e-35	CD8Tcells	Prdx6
1.04421e-38	1.61496	0.565	0.259	2.31146e-34	CD8Tcells	Malt1
1.31213e-38	2.18092	0.469	0.196	2.90453e-34	CD8Tcells	H2-Q4
2.2355e-38	2.17759	0.438	0.166	4.9485e-34	CD8Tcells	Il2rg
4.84599e-36	2.96574	0.257	0.063	1.07271e-31	CD8Tcells	Abhd8
8.57311e-36	3.09083	0.325	0.101	1.89774e-31	CD8Tcells	Ier5l
2.11247e-35	1.54469	0.449	0.173	4.67617e-31	CD8Tcells	Rhoh
2.62431e-34	2.48414	0.315	0.097	5.80917e-30	CD8Tcells	Spn
4.3453e-34	2.03297	0.507	0.235	9.61875e-30	CD8Tcells	Nr4a2
2.23065e-33	1.98802	0.483	0.218	4.93777e-29	CD8Tcells	Ccnd2
9.52276e-33	2.00955	0.363	0.128	2.10796e-28	CD8Tcells	Cyfip2
2.37176e-32	2.04654	0.36	0.127	5.25014e-28	CD8Tcells	Nlrc5
3.78084e-32	2.63245	0.301	0.094	8.36927e-28	CD8Tcells	Ppp3cc
9.10944e-31	2.16406	0.404	0.163	2.01647e-26	CD8Tcells	Nr4a3
2.07062e-30	2.71213	0.26	0.074	4.58352e-26	CD8Tcells	Cobll1
1.87855e-29	2.1918	0.401	0.173	4.15836e-25	CD8Tcells	Cd82
2.19204e-28	1.81559	0.26	0.073	4.8523e-24	CD8Tcells	Gpr171
6.38806e-28	2.19466	0.267	0.081	1.41406e-23	CD8Tcells	Rasgrp1
1.16832e-27	2.20912	0.521	0.312	2.58619e-23	CD8Tcells	Abcb1b
3.53025e-27	1.89256	0.5	0.273	7.81456e-23	CD8Tcells	Bcl2
1.74501e-26	1.69242	0.503	0.279	3.86275e-22	CD8Tcells	AU020206
2.09375e-26	1.66623	0.503	0.281	4.63471e-22	CD8Tcells	Fryl
3.82949e-26	1.60651	0.568	0.359	8.47697e-22	CD8Tcells	Zc3hav1
7.36961e-25	1.89838	0.514	0.315	1.63134e-20	CD8Tcells	Uhrf2
1.14799e-24	2.24903	0.291	0.105	2.5412e-20	CD8Tcells	Socs1
6.08872e-24	1.73115	0.401	0.184	1.3478e-19	CD8Tcells	4930523C07Rik
3.75255e-23	1.60113	0.548	0.372	8.30664e-19	CD8Tcells	Mbd2
4.48811e-23	1.88015	0.353	0.152	9.93488e-19	CD8Tcells	Grap
6.71616e-23	1.51108	0.483	0.272	1.48669e-18	CD8Tcells	Fam107b
8.34224e-23	1.52888	0.555	0.369	1.84664e-18	CD8Tcells	Rabgap1l
1.45327e-21	2.42784	0.264	0.098	3.21695e-17	CD8Tcells	Dbf4
1.4777e-21	1.81402	0.36	0.166	3.27104e-17	CD8Tcells	H2-T22
3.61857e-21	2.01283	0.527	0.345	8.01007e-17	CD8Tcells	Odc1
9.33709e-21	2.15265	0.264	0.099	2.06686e-16	CD8Tcells	Tecpr1
1.08563e-20	2.27336	0.301	0.128	2.40314e-16	CD8Tcells	Osbpl3
1.85167e-20	1.52197	0.305	0.124	4.09886e-16	CD8Tcells	Dut
3.52583e-20	1.65218	0.318	0.137	7.80477e-16	CD8Tcells	Sept6
3.57285e-20	2.03495	0.291	0.12	7.90887e-16	CD8Tcells	Crot
3.58016e-20	1.88332	0.322	0.138	7.92505e-16	CD8Tcells	Rgcc
4.54129e-20	2.14105	0.288	0.119	1.00526e-15	CD8Tcells	Plekha5
5.1494e-20	2.06524	0.305	0.131	1.13987e-15	CD8Tcells	Plaat3
5.73844e-20	1.63529	0.452	0.27	1.27026e-15	CD8Tcells	Fkbp3
7.26478e-20	1.77703	0.377	0.191	1.60813e-15	CD8Tcells	Vgll4
4.70309e-19	1.6965	0.346	0.164	1.04108e-14	CD8Tcells	Zdhhc18
8.40249e-19	1.55296	0.373	0.187	1.85998e-14	CD8Tcells	Hilpda
6.47393e-18	1.80426	0.291	0.126	1.43307e-13	CD8Tcells	Slco3a1
8.17029e-18	1.74295	0.339	0.169	1.80858e-13	CD8Tcells	Il21r
1.31607e-17	1.69646	0.414	0.245	2.91324e-13	CD8Tcells	Anxa6
2.02122e-17	2.11573	0.26	0.109	4.47418e-13	CD8Tcells	Sesn3
2.18586e-16	1.63669	0.25	0.102	4.83862e-12	CD8Tcells	Ipcef1
2.57962e-16	1.77862	0.284	0.129	5.71025e-12	CD8Tcells	Dgat1
6.08819e-15	1.64717	0.342	0.185	1.34768e-10	CD8Tcells	Bin2
1.80931e-14	1.75716	0.349	0.2	4.00509e-10	CD8Tcells	Fam204a
3.22513e-13	1.54947	0.377	0.236	7.13914e-09	CD8Tcells	Vps54
3.26506e-13	1.51931	0.36	0.218	7.22753e-09	CD8Tcells	Med10
5.88082e-13	1.71086	0.277	0.142	1.30178e-08	CD8Tcells	Abhd2
6.04912e-13	1.78031	0.25	0.117	1.33903e-08	CD8Tcells	Znrf3
1.02191e-12	1.53191	0.312	0.169	2.26211e-08	CD8Tcells	Cbx4
1.1675e-12	2.03706	0.257	0.128	2.58439e-08	CD8Tcells	Raet1e
1.42603e-12	1.61069	0.339	0.202	3.15667e-08	CD8Tcells	Sms
1.31301e-11	1.61807	0.291	0.163	2.90648e-07	CD8Tcells	Srpk1
4.40106e-11	1.9061	0.253	0.132	9.74218e-07	CD8Tcells	Phf6
3.13108e-10	1.62691	0.253	0.137	6.93095e-06	CD8Tcells	Sp4
5.65332e-07	1.96528	0.267	0.18	0.0125142	CD8Tcells	Ern1
1.22353e-86	2.05035	0.792	0.183	2.7084e-82	MonoMacDC_CD209	Plbd1
1.24032e-79	2.36943	0.68	0.142	2.74558e-75	MonoMacDC_CD209	Napsa
9.01469e-64	2.26869	0.522	0.101	1.99549e-59	MonoMacDC_CD209	Itgax
1.04643e-60	2.1447	0.927	0.509	2.31637e-56	MonoMacDC_CD209	Ifi30
1.07843e-57	2.05952	0.758	0.236	2.38722e-53	MonoMacDC_CD209	Gngt2
1.6187e-56	1.96968	0.955	0.526	3.58315e-52	MonoMacDC_CD209	Lgals3
2.20258e-54	1.62579	0.888	0.348	4.87564e-50	MonoMacDC_CD209	H2-DMb1
2.21378e-52	1.70795	0.949	0.535	4.90043e-48	MonoMacDC_CD209	H2-Ab1
3.19788e-51	1.66824	0.944	0.498	7.07882e-47	MonoMacDC_CD209	H2-Eb1
7.83717e-51	1.84033	0.455	0.092	1.73484e-46	MonoMacDC_CD209	Fgr
4.81581e-48	1.51914	0.944	0.509	1.06603e-43	MonoMacDC_CD209	H2-Aa
9.20928e-47	1.90023	0.691	0.233	2.03857e-42	MonoMacDC_CD209	Plaur
3.62003e-44	1.60055	0.837	0.406	8.0133e-40	MonoMacDC_CD209	Gm2a
1.19583e-43	1.6887	0.691	0.24	2.64709e-39	MonoMacDC_CD209	Il1b
2.29183e-41	1.59698	0.646	0.204	5.07319e-37	MonoMacDC_CD209	Ccr2
3.44001e-39	2.15337	0.292	0.05	7.61481e-35	MonoMacDC_CD209	Sirpb1c
1.38941e-38	1.56685	0.562	0.168	3.07559e-34	MonoMacDC_CD209	Havcr2
5.9254e-37	2.33341	0.258	0.042	1.31165e-32	MonoMacDC_CD209	Gpr141
1.88807e-32	1.64387	0.742	0.336	4.17942e-28	MonoMacDC_CD209	Rnh1
1.54919e-31	1.89428	0.494	0.158	3.4293e-27	MonoMacDC_CD209	Tnip3
1.81335e-30	2.17719	0.281	0.059	4.01402e-26	MonoMacDC_CD209	Amz1
3.57284e-30	1.60964	0.438	0.127	7.90885e-26	MonoMacDC_CD209	Ciita
1.45647e-26	2.00326	0.303	0.075	3.22405e-22	MonoMacDC_CD209	Sh2d1b1
7.91114e-26	1.86335	0.388	0.12	1.75121e-21	MonoMacDC_CD209	Olfm1
1.44362e-23	2.1755	0.258	0.063	3.19559e-19	MonoMacDC_CD209	Ctnnd2
3.00171e-23	2.12346	0.298	0.082	6.64458e-19	MonoMacDC_CD209	Clec4b1
1.14615e-21	2.38575	0.253	0.064	2.53713e-17	MonoMacDC_CD209	Ms4a4c
3.12999e-21	1.78649	0.371	0.123	6.92854e-17	MonoMacDC_CD209	Tgm2
3.38685e-17	1.68081	0.348	0.13	7.49713e-13	MonoMacDC_CD209	Avpi1
5.85604e-17	1.76276	0.253	0.075	1.29629e-12	MonoMacDC_CD209	Grasp
5.29348e-16	1.50041	0.258	0.08	1.17176e-11	MonoMacDC_CD209	Bri3bp
7.31087e-12	1.52716	0.298	0.122	1.61833e-07	MonoMacDC_CD209	Pot1b
1.91014e-09	1.568	0.258	0.111	4.22829e-05	MonoMacDC_CD209	Fabp5
0	3.42813	0.982	0.227	0	ResidentMacs	F13a1
0	4.18087	0.773	0.065	0	ResidentMacs	Lyve1
0	3.26639	0.852	0.17	0	ResidentMacs	Cbr2
0	3.64846	0.747	0.088	0	ResidentMacs	Folr2
0	2.84661	0.896	0.254	0	ResidentMacs	Gas6
0	2.46682	0.974	0.357	0	ResidentMacs	Pf4
0	2.72246	0.988	0.387	0	ResidentMacs	Mrc1
0	2.62175	0.913	0.335	0	ResidentMacs	Stab1
0	3.7632	0.652	0.082	0	ResidentMacs	C4b
0	2.67035	0.89	0.324	0	ResidentMacs	Cfh
0	2.66147	0.974	0.409	0	ResidentMacs	Maf
0	2.69079	0.856	0.353	0	ResidentMacs	Fcgrt
0	2.11069	0.955	0.463	0	ResidentMacs	Dab2
0	2.14726	0.983	0.569	0	ResidentMacs	Grn
0	2.58767	0.995	0.582	0	ResidentMacs	Selenop
0	1.53287	0.987	0.81	0	ResidentMacs	Serinc3
1.53229e-300	3.61825	0.646	0.107	3.39187e-296	ResidentMacs	Cd163
4.52178e-300	3.13167	0.693	0.139	1.00094e-295	ResidentMacs	Ltc4s
1.30205e-295	2.159	0.941	0.607	2.88221e-291	ResidentMacs	Rbpj
7.58015e-292	2.37944	0.872	0.403	1.67794e-287	ResidentMacs	Glul
1.40104e-291	3.69261	0.59	0.07	3.10135e-287	ResidentMacs	Ccl8
9.72475e-287	2.38449	0.838	0.344	2.15267e-282	ResidentMacs	Wwp1
3.4516e-281	2.39553	0.799	0.262	7.64045e-277	ResidentMacs	Igfbp4
3.74867e-275	1.73905	0.987	0.599	8.29806e-271	ResidentMacs	Lgmn
6.08119e-273	2.49809	0.813	0.288	1.34613e-268	ResidentMacs	Ccl9
2.82564e-271	1.73298	0.934	0.608	6.25485e-267	ResidentMacs	Cltc
4.3848e-268	2.32615	0.82	0.314	9.70619e-264	ResidentMacs	Rnase4
6.83054e-264	2.9547	0.703	0.181	1.51201e-259	ResidentMacs	Fxyd2
1.93045e-257	2.37994	0.779	0.273	4.27324e-253	ResidentMacs	Pmp22
8.63603e-257	1.99059	0.877	0.441	1.91167e-252	ResidentMacs	Ninj1
2.72471e-256	2.37087	0.813	0.35	6.03142e-252	ResidentMacs	Mctp1
3.34491e-255	2.35276	0.841	0.352	7.40428e-251	ResidentMacs	Ccl6
1.79062e-247	1.54484	0.965	0.652	3.96371e-243	ResidentMacs	Ctsc
1.41824e-234	3.7474	0.491	0.059	3.13941e-230	ResidentMacs	Plekhg5
3.53004e-233	2.13754	0.818	0.39	7.81409e-229	ResidentMacs	Frmd4b
6.77864e-233	2.90726	0.629	0.157	1.50052e-228	ResidentMacs	Stard8
2.72418e-229	1.97959	0.805	0.301	6.03025e-225	ResidentMacs	Cd36
8.66207e-228	3.59602	0.554	0.104	1.91743e-223	ResidentMacs	Clec10a
8.78507e-227	1.70208	0.897	0.49	1.94466e-222	ResidentMacs	Timp2
5.20316e-225	3.7671	0.45	0.043	1.15177e-220	ResidentMacs	Ccl24
4.78528e-224	2.05394	0.791	0.322	1.05927e-219	ResidentMacs	Psd3
3.68013e-223	2.51484	0.705	0.243	8.14634e-219	ResidentMacs	Lifr
1.48353e-220	1.54252	0.915	0.512	3.28395e-216	ResidentMacs	Csf1r
2.50362e-213	4.51403	0.4	0.029	5.54202e-209	ResidentMacs	Ednrb
5.26972e-213	2.2064	0.755	0.338	1.16651e-208	ResidentMacs	Ap2a2
1.84025e-210	2.27811	0.67	0.187	4.07358e-206	ResidentMacs	Ccl7
2.08243e-207	1.63328	0.879	0.466	4.60967e-203	ResidentMacs	Ms4a6c
7.15477e-206	1.68622	0.86	0.457	1.58378e-201	ResidentMacs	Trf
4.54306e-205	2.1774	0.718	0.277	1.00565e-200	ResidentMacs	Hmox1
2.80744e-204	1.51796	0.904	0.501	6.21454e-200	ResidentMacs	Tgfbi
6.93119e-202	2.47112	0.647	0.21	1.53429e-197	ResidentMacs	Itsn1
3.25709e-196	1.75455	0.811	0.364	7.2099e-192	ResidentMacs	Pltp
6.34041e-192	1.59242	0.86	0.506	1.40351e-187	ResidentMacs	Tcf4
5.1796e-189	1.82294	0.862	0.466	1.14656e-184	ResidentMacs	Wfdc17
6.09652e-184	2.40293	0.625	0.211	1.34953e-179	ResidentMacs	Tcn2
1.38873e-182	3.04431	0.492	0.103	3.0741e-178	ResidentMacs	Pdgfc
1.67242e-182	1.67234	0.849	0.508	3.70207e-178	ResidentMacs	Fcgr2b
5.90785e-181	2.84629	0.509	0.115	1.30776e-176	ResidentMacs	Etv1
7.56344e-177	1.54042	0.826	0.367	1.67424e-172	ResidentMacs	Ccl2
1.49753e-174	2.30479	0.618	0.205	3.31493e-170	ResidentMacs	Ophn1
2.60601e-172	1.63482	0.836	0.444	5.76866e-168	ResidentMacs	Marcksl1
2.13881e-169	1.82731	0.641	0.201	4.73448e-165	ResidentMacs	Tns1
4.82397e-169	1.84382	0.797	0.397	1.06783e-164	ResidentMacs	Ifi27l2a
4.88738e-168	3.955	0.34	0.03	1.08187e-163	ResidentMacs	Vsig4
1.0777e-164	1.72519	0.771	0.43	2.38561e-160	ResidentMacs	Myo5a
3.7289e-162	2.12619	0.617	0.218	8.25428e-158	ResidentMacs	Rgl1
7.12617e-161	1.61664	0.808	0.464	1.57745e-156	ResidentMacs	Abca1
1.43027e-160	3.94576	0.336	0.033	3.16605e-156	ResidentMacs	Fcna
3.68128e-160	1.95503	0.721	0.39	8.14889e-156	ResidentMacs	Snx2
5.88756e-159	2.97428	0.41	0.068	1.30327e-154	ResidentMacs	Gpx3
1.37717e-158	2.26898	0.596	0.216	3.04851e-154	ResidentMacs	Dse
5.49824e-153	2.12879	0.626	0.234	1.21709e-148	ResidentMacs	Agmo
1.2545e-149	1.59153	0.766	0.448	2.77696e-145	ResidentMacs	Ehd4
6.86531e-149	2.1922	0.619	0.265	1.5197e-144	ResidentMacs	Ap1b1
6.9931e-149	1.87476	0.691	0.352	1.54799e-144	ResidentMacs	Eps15
3.2111e-147	3.28991	0.386	0.068	7.10809e-143	ResidentMacs	Npl
1.59919e-143	1.95659	0.672	0.335	3.53996e-139	ResidentMacs	Mtss1
3.0944e-142	2.46002	0.543	0.192	6.84977e-138	ResidentMacs	Pros1
1.02139e-139	3.34929	0.411	0.094	2.26095e-135	ResidentMacs	Colec12
9.52524e-139	2.88819	0.387	0.073	2.10851e-134	ResidentMacs	Reps2
3.35201e-138	2.57647	0.506	0.167	7.42002e-134	ResidentMacs	Sulf2
1.05803e-136	2.03915	0.623	0.276	2.34206e-132	ResidentMacs	Sbf2
3.17631e-132	1.55498	0.79	0.536	7.03108e-128	ResidentMacs	Ddx3x
4.98678e-132	1.9069	0.59	0.233	1.10387e-127	ResidentMacs	Abca9
5.64654e-132	2.50634	0.466	0.136	1.24992e-127	ResidentMacs	Rab11fip5
2.71534e-131	2.14669	0.571	0.23	6.01068e-127	ResidentMacs	Adam15
5.52612e-131	3.91759	0.265	0.021	1.22326e-126	ResidentMacs	Chp2
1.12818e-130	2.8907	0.358	0.062	2.49735e-126	ResidentMacs	Cp
3.80178e-130	2.64665	0.444	0.123	8.41562e-126	ResidentMacs	Fgfr1
1.08377e-128	1.85831	0.623	0.285	2.39904e-124	ResidentMacs	Rnf150
9.36615e-125	2.18904	0.547	0.219	2.07329e-120	ResidentMacs	Lrp6
1.94459e-122	3.44071	0.296	0.04	4.30455e-118	ResidentMacs	Egfr
1.24577e-120	1.65342	0.636	0.283	2.75764e-116	ResidentMacs	Msr1
1.96063e-120	2.13969	0.56	0.252	4.34005e-116	ResidentMacs	Pepd
4.74667e-119	1.72498	0.581	0.224	1.05072e-114	ResidentMacs	Hpgd
5.68586e-118	2.01122	0.583	0.265	1.25862e-113	ResidentMacs	Rin2
6.56149e-116	2.0859	0.511	0.191	1.45245e-111	ResidentMacs	Sgpp1
3.83546e-115	2.52289	0.418	0.117	8.49017e-111	ResidentMacs	Rnasel
3.89726e-114	1.72902	0.585	0.252	8.62698e-110	ResidentMacs	Clec4a1
1.19393e-113	1.69244	0.573	0.232	2.64289e-109	ResidentMacs	Mir99ahg
1.2233e-113	1.52957	0.711	0.427	2.7079e-109	ResidentMacs	Man2a1
2.68883e-113	1.57288	0.67	0.35	5.95199e-109	ResidentMacs	Serpinb6a
4.20292e-113	1.88408	0.536	0.204	9.30359e-109	ResidentMacs	Slco2b1
5.35812e-113	1.72377	0.594	0.275	1.18607e-108	ResidentMacs	Gas7
5.63885e-109	2.28502	0.457	0.154	1.24822e-104	ResidentMacs	Cd38
4.14931e-107	1.87719	0.547	0.238	9.18492e-103	ResidentMacs	Cebpd
1.36675e-105	1.95032	0.521	0.222	3.02544e-101	ResidentMacs	Man1c1
4.54727e-102	2.05049	0.478	0.184	1.00658e-97	ResidentMacs	Cfp
2.60214e-100	1.74499	0.548	0.243	5.76009e-96	ResidentMacs	Mertk
3.94741e-100	1.56882	0.593	0.295	8.73799e-96	ResidentMacs	Rab31
5.14908e-100	1.84929	0.491	0.187	1.1398e-95	ResidentMacs	Ifi204
2.15679e-98	1.53481	0.737	0.475	4.77427e-94	ResidentMacs	Klf4
4.49694e-98	1.72911	0.553	0.265	9.95443e-94	ResidentMacs	Zdhhc14
6.88431e-97	1.77908	0.551	0.272	1.52391e-92	ResidentMacs	Wdfy3
1.28675e-95	3.2234	0.276	0.051	2.84835e-91	ResidentMacs	Cpne8
3.51588e-95	1.72774	0.549	0.256	7.78275e-91	ResidentMacs	Eps8
1.34605e-94	1.94373	0.466	0.18	2.97963e-90	ResidentMacs	Sema4a
1.5009e-94	2.0467	0.519	0.228	3.3224e-90	ResidentMacs	Mt2
1.6259e-93	1.72562	0.552	0.28	3.5991e-89	ResidentMacs	Ctnnd1
4.00407e-92	1.95941	0.467	0.183	8.86342e-88	ResidentMacs	Sh3bp5
6.70162e-91	1.81248	0.491	0.212	1.48347e-86	ResidentMacs	Rab3il1
2.279e-87	1.68381	0.533	0.261	5.0448e-83	ResidentMacs	Rassf2
6.41907e-86	1.97096	0.424	0.158	1.42093e-81	ResidentMacs	Gpr34
1.05081e-85	2.03851	0.391	0.13	2.32608e-81	ResidentMacs	Alox5
1.20339e-85	2.04171	0.405	0.146	2.66382e-81	ResidentMacs	Sult1a1
1.21874e-84	2.27074	0.36	0.113	2.69781e-80	ResidentMacs	Nfxl1
4.34212e-84	1.54545	0.581	0.326	9.61172e-80	ResidentMacs	Tpp1
2.34545e-79	1.62752	0.492	0.226	5.19189e-75	ResidentMacs	Slc7a8
3.95906e-79	2.04553	0.364	0.122	8.76377e-75	ResidentMacs	P2ry12
8.13204e-79	1.60742	0.56	0.324	1.80011e-74	ResidentMacs	Mfsd1
1.48846e-77	1.7562	0.481	0.228	3.29487e-73	ResidentMacs	Tbxas1
2.19684e-77	2.86968	0.25	0.053	4.86292e-73	ResidentMacs	Trpv4
1.34957e-76	1.82253	0.46	0.215	2.9874e-72	ResidentMacs	Snx8
3.03587e-75	1.78037	0.421	0.173	6.72021e-71	ResidentMacs	Nrp2
4.7144e-74	1.57129	0.499	0.243	1.04358e-69	ResidentMacs	Tlr7
2.78921e-73	1.67303	0.443	0.198	6.17419e-69	ResidentMacs	B4galt6
3.50282e-72	1.6613	0.508	0.263	7.75385e-68	ResidentMacs	Sdc3
1.17143e-70	1.76758	0.47	0.23	2.59309e-66	ResidentMacs	Tmem106a
1.30076e-70	1.96303	0.371	0.142	2.87937e-66	ResidentMacs	Serpinb8
8.94263e-70	1.97338	0.386	0.156	1.97954e-65	ResidentMacs	Clcn5
4.34494e-69	1.89709	0.427	0.2	9.61797e-65	ResidentMacs	Klhl9
5.24945e-68	2.05464	0.357	0.134	1.16202e-63	ResidentMacs	Prune2
5.54687e-68	1.808	0.433	0.204	1.22785e-63	ResidentMacs	Plekhb2
1.31066e-67	2.15469	0.337	0.122	2.90128e-63	ResidentMacs	Cmklr1
7.88902e-67	2.56856	0.271	0.077	1.74631e-62	ResidentMacs	Nhsl2
2.6673e-65	1.83952	0.368	0.149	5.90433e-61	ResidentMacs	Tlr4
4.27308e-65	2.05853	0.345	0.133	9.45889e-61	ResidentMacs	Zcchc24
1.19325e-60	1.54661	0.443	0.225	2.64138e-56	ResidentMacs	Hacd4
4.58906e-60	2.21245	0.272	0.085	1.01583e-55	ResidentMacs	Kitl
1.06699e-59	1.82267	0.377	0.165	2.36188e-55	ResidentMacs	Prkn
1.16664e-56	1.51576	0.462	0.255	2.58247e-52	ResidentMacs	Plxnb2
2.80116e-56	1.83212	0.307	0.112	6.20064e-52	ResidentMacs	Rasgrp3
3.87311e-55	1.68968	0.406	0.199	8.57351e-51	ResidentMacs	Dusp6
8.1693e-54	1.50938	0.386	0.178	1.80836e-49	ResidentMacs	Xdh
1.08134e-51	2.06154	0.289	0.11	2.39366e-47	ResidentMacs	Rasal2
1.00213e-50	1.89808	0.342	0.154	2.21832e-46	ResidentMacs	P2rx7
3.35942e-49	1.52566	0.443	0.256	7.43642e-45	ResidentMacs	Tubb6
1.14451e-48	1.58044	0.409	0.214	2.53349e-44	ResidentMacs	Il4ra
2.54125e-46	2.15796	0.251	0.09	5.62531e-42	ResidentMacs	2610203C22Rik
3.66119e-46	1.69003	0.357	0.178	8.1044e-42	ResidentMacs	Idh2
4.04675e-46	1.89906	0.268	0.102	8.95788e-42	ResidentMacs	Ang
4.73382e-46	1.54285	0.369	0.184	1.04788e-41	ResidentMacs	Smagp
1.50987e-44	1.54947	0.356	0.176	3.34224e-40	ResidentMacs	Wdfy2
6.1462e-44	1.68226	0.36	0.184	1.36052e-39	ResidentMacs	Pacs2
7.40168e-44	1.66707	0.356	0.181	1.63844e-39	ResidentMacs	Snx30
5.74602e-42	1.59526	0.306	0.138	1.27194e-37	ResidentMacs	Plod1
1.61672e-40	1.63736	0.341	0.176	3.57877e-36	ResidentMacs	Mcfd2
5.12808e-39	1.81672	0.257	0.106	1.13515e-34	ResidentMacs	Fer
8.94294e-39	1.55661	0.32	0.157	1.97961e-34	ResidentMacs	Evi5
4.97636e-38	1.51066	0.38	0.22	1.10157e-33	ResidentMacs	Sft2d2
5.10159e-38	1.553	0.334	0.173	1.12929e-33	ResidentMacs	Idh1
5.31035e-38	1.84463	0.252	0.101	1.1755e-33	ResidentMacs	Vcam1
1.82816e-37	1.80813	0.265	0.116	4.04682e-33	ResidentMacs	Stxbp6
2.24126e-37	1.67749	0.31	0.155	4.96126e-33	ResidentMacs	Cln8
2.71626e-37	1.65078	0.311	0.156	6.0127e-33	ResidentMacs	Galc
2.85549e-36	1.56555	0.329	0.177	6.32091e-32	ResidentMacs	Mgat1
6.89455e-35	1.59094	0.372	0.218	1.52618e-30	ResidentMacs	Emp1
7.73097e-35	1.60408	0.266	0.12	1.71133e-30	ResidentMacs	Mid1ip1
1.46316e-34	1.50113	0.295	0.143	3.23885e-30	ResidentMacs	Rgs18
1.12972e-33	1.50525	0.307	0.161	2.50075e-29	ResidentMacs	Mfsd11
9.46939e-33	1.57018	0.307	0.164	2.09614e-28	ResidentMacs	Inpp4a
2.8272e-31	1.59053	0.258	0.123	6.25829e-27	ResidentMacs	Lyl1
8.35659e-30	1.64147	0.309	0.174	1.84982e-25	ResidentMacs	Slc29a1
1.69985e-25	1.52357	0.288	0.168	3.7628e-21	ResidentMacs	Ids
3.13079e-23	1.51754	0.289	0.173	6.93031e-19	ResidentMacs	Ube2g2
2.62315e-10	4.4024	0.29	0.049	5.8066e-06	Mac_likeT	Gpnmb
9.13182e-06	1.57892	0.742	0.632	0.202142	Mac_likeT	Cd63
9.94186e-06	1.50084	0.871	0.793	0.220073	Mac_likeT	Ctsb
0.000556156	3.28663	0.29	0.116	1	Mac_likeT	Fabp5
0.00270768	1.68738	0.29	0.122	1	Mac_likeT	Vsig4
4.71032e-121	6.01758	0.427	0.024	1.04268e-116	MonoMacDC_Ccr2	Retnla
5.37947e-83	4.71379	0.35	0.025	1.1908e-78	MonoMacDC_Ccr2	Ear2
9.19374e-80	5.89165	0.504	0.059	2.03513e-75	MonoMacDC_Ccr2	Lyz1
3.10719e-63	4.70425	0.607	0.113	6.87807e-59	MonoMacDC_Ccr2	Fn1
1.75825e-46	2.50823	0.393	0.057	3.89206e-42	MonoMacDC_Ccr2	Ifitm6
5.33845e-46	1.96068	0.821	0.253	1.18172e-41	MonoMacDC_Ccr2	Gda
4.05834e-45	3.05196	0.453	0.081	8.98354e-41	MonoMacDC_Ccr2	Clec4b1
5.71107e-42	2.55393	0.538	0.12	1.2642e-37	MonoMacDC_Ccr2	Olfm1
1.63195e-40	2.67691	0.667	0.21	3.61249e-36	MonoMacDC_Ccr2	Ccr2
1.50336e-39	2.35485	0.265	0.03	3.32785e-35	MonoMacDC_Ccr2	Ms4a8a
2.27105e-37	2.68585	0.496	0.113	5.02719e-33	MonoMacDC_Ccr2	Lpl
2.90461e-37	2.64846	0.308	0.043	6.42965e-33	MonoMacDC_Ccr2	Cd209a
3.83625e-37	1.55048	0.479	0.097	8.49192e-33	MonoMacDC_Ccr2	Fgr
4.08304e-37	2.64038	0.299	0.041	9.03822e-33	MonoMacDC_Ccr2	Ltb4r1
4.9659e-36	1.89709	0.761	0.258	1.09925e-31	MonoMacDC_Ccr2	Cfp
8.10304e-34	1.55593	0.991	0.88	1.79369e-29	MonoMacDC_Ccr2	Crip1
1.21421e-33	1.88032	0.581	0.157	2.68777e-29	MonoMacDC_Ccr2	Plxnd1
1.35753e-33	2.46841	0.368	0.067	3.00503e-29	MonoMacDC_Ccr2	Tiam1
1.86485e-33	1.93283	0.906	0.488	4.12802e-29	MonoMacDC_Ccr2	Ccl6
1.50834e-32	1.54988	0.915	0.433	3.33887e-28	MonoMacDC_Ccr2	Ccl9
9.07505e-30	1.74734	0.641	0.216	2.00885e-25	MonoMacDC_Ccr2	Naaa
1.02232e-29	1.54069	0.906	0.504	2.263e-25	MonoMacDC_Ccr2	S100a4
4.52439e-29	2.09261	0.308	0.054	1.00152e-24	MonoMacDC_Ccr2	Gm15987
1.41883e-28	1.58349	0.889	0.488	3.14073e-24	MonoMacDC_Ccr2	Pltp
2.20697e-28	2.8332	0.376	0.082	4.88534e-24	MonoMacDC_Ccr2	Chn2
3.92771e-28	1.69921	0.556	0.155	8.69439e-24	MonoMacDC_Ccr2	Dok2
6.82133e-27	1.95478	0.573	0.184	1.50997e-22	MonoMacDC_Ccr2	Apba1
9.01685e-27	1.96942	0.658	0.238	1.99597e-22	MonoMacDC_Ccr2	Ecm1
6.1474e-26	1.66862	0.658	0.253	1.36079e-21	MonoMacDC_Ccr2	Mcub
1.2344e-25	2.05905	0.521	0.162	2.73247e-21	MonoMacDC_Ccr2	Tnip3
2.60767e-25	1.61282	0.624	0.221	5.77234e-21	MonoMacDC_Ccr2	Sept11
3.54935e-25	1.80771	0.598	0.194	7.85685e-21	MonoMacDC_Ccr2	Emilin2
1.18381e-24	1.67233	0.547	0.17	2.62048e-20	MonoMacDC_Ccr2	Grk5
1.59893e-24	1.98599	0.342	0.073	3.5394e-20	MonoMacDC_Ccr2	Tnfrsf21
1.74709e-23	2.08683	0.282	0.055	3.86735e-19	MonoMacDC_Ccr2	Nectin1
2.11345e-23	1.65216	0.385	0.093	4.67832e-19	MonoMacDC_Ccr2	Cd200r1
4.14987e-23	1.63353	0.573	0.2	9.18615e-19	MonoMacDC_Ccr2	Plbd1
8.4851e-23	1.84939	0.385	0.098	1.87826e-18	MonoMacDC_Ccr2	Rab11fip1
3.17355e-20	2.33995	0.393	0.117	7.02498e-16	MonoMacDC_Ccr2	Tppp3
6.95298e-20	1.55653	0.658	0.289	1.53911e-15	MonoMacDC_Ccr2	Ccdc88a
1.06629e-18	1.88982	0.308	0.076	2.36034e-14	MonoMacDC_Ccr2	Adam8
1.27065e-18	1.69168	0.256	0.055	2.81271e-14	MonoMacDC_Ccr2	Sirpb1c
1.58929e-18	1.57409	0.744	0.416	3.51806e-14	MonoMacDC_Ccr2	Gm2a
2.4136e-18	1.95148	0.333	0.088	5.34274e-14	MonoMacDC_Ccr2	Gm21188
4.95886e-16	1.87815	0.333	0.098	1.09769e-11	MonoMacDC_Ccr2	Il1rn
5.87899e-16	1.63204	0.402	0.132	1.30137e-11	MonoMacDC_Ccr2	Avpi1
2.44592e-15	1.50363	0.632	0.303	5.41429e-11	MonoMacDC_Ccr2	Mgl2
2.63008e-15	1.77273	0.316	0.093	5.82194e-11	MonoMacDC_Ccr2	St3gal5
5.01911e-15	1.67077	0.265	0.069	1.11103e-10	MonoMacDC_Ccr2	Baiap2
1.20395e-12	1.58329	0.419	0.166	2.66507e-08	MonoMacDC_Ccr2	Csf2rb
3.08622e-12	1.51123	0.607	0.317	6.83165e-08	MonoMacDC_Ccr2	Trerf1
2.82319e-11	1.55152	0.256	0.079	6.24941e-07	MonoMacDC_Ccr2	Pik3r6
6.52865e-11	1.70806	0.256	0.08	1.44518e-06	MonoMacDC_Ccr2	Epb41l1
1.09433e-304	6.41967	0.925	0.021	2.4224e-300	CD4CD8Tcells	Rag1
7.07372e-223	6.10143	0.868	0.028	1.56584e-218	CD4CD8Tcells	Arpp21
2.06333e-180	5.91785	0.585	0.014	4.5674e-176	CD4CD8Tcells	Tctex1d1
5.32444e-164	5.75063	0.774	0.032	1.17862e-159	CD4CD8Tcells	Myb
4.74446e-151	5.65215	0.66	0.024	1.05023e-146	CD4CD8Tcells	Dntt
7.33244e-145	7.34858	0.264	0.002	1.62311e-140	CD4CD8Tcells	BB031773
2.15569e-142	5.66156	0.736	0.034	4.77184e-138	CD4CD8Tcells	Ccr9
3.37447e-140	6.20208	0.566	0.019	7.46974e-136	CD4CD8Tcells	Chrna9
1.99325e-131	5.83044	0.66	0.03	4.41226e-127	CD4CD8Tcells	Wdr78
1.55344e-126	5.57988	0.755	0.042	3.4387e-122	CD4CD8Tcells	2610307P16Rik
3.92798e-121	6.1118	0.358	0.007	8.69498e-117	CD4CD8Tcells	Gm20098
9.67914e-112	5.46616	0.736	0.047	2.14257e-107	CD4CD8Tcells	Cd4
7.07813e-109	6.83918	0.302	0.006	1.56682e-104	CD4CD8Tcells	Tdrd5
6.47835e-108	5.95842	0.415	0.013	1.43405e-103	CD4CD8Tcells	Rorc
7.42645e-98	5.87141	0.509	0.024	1.64392e-93	CD4CD8Tcells	Nsg2
4.91955e-95	5.45894	0.415	0.015	1.08899e-90	CD4CD8Tcells	Gm15340
2.99177e-93	6.87942	0.264	0.005	6.62258e-89	CD4CD8Tcells	Gm12709
5.93041e-92	4.63126	0.849	0.081	1.31276e-87	CD4CD8Tcells	Tcf7
1.33344e-91	4.97981	0.981	0.121	2.9517e-87	CD4CD8Tcells	Themis
8.94543e-84	5.8591	0.415	0.018	1.98016e-79	CD4CD8Tcells	Endou
3.99158e-83	5.11508	0.962	0.131	8.83577e-79	CD4CD8Tcells	Satb1
2.47541e-82	5.53479	0.396	0.016	5.47957e-78	CD4CD8Tcells	Dnajc6
2.82029e-81	4.64853	0.887	0.105	6.24299e-77	CD4CD8Tcells	Camk4
1.05219e-80	3.63581	0.868	0.092	2.32913e-76	CD4CD8Tcells	Cd8b1
6.63106e-80	6.03208	0.377	0.015	1.46785e-75	CD4CD8Tcells	Gm40841
1.84671e-79	4.57416	0.679	0.057	4.08788e-75	CD4CD8Tcells	Lef1
3.66739e-79	5.80148	0.962	0.142	8.11813e-75	CD4CD8Tcells	Gm4258
1.04153e-77	5.26127	0.472	0.026	2.30553e-73	CD4CD8Tcells	Trat1
1.26994e-77	4.45546	0.849	0.1	2.81113e-73	CD4CD8Tcells	Cd247
1.63058e-75	5.46893	0.623	0.051	3.60946e-71	CD4CD8Tcells	Sox4
2.04995e-75	4.24543	0.717	0.067	4.53776e-71	CD4CD8Tcells	Cd8a
7.05598e-73	5.51673	0.396	0.019	1.56191e-68	CD4CD8Tcells	Aqp11
1.38259e-71	5.29031	0.321	0.012	3.06049e-67	CD4CD8Tcells	Syt13
2.93469e-65	4.25813	0.736	0.086	6.49623e-61	CD4CD8Tcells	Txk
6.29797e-65	5.08713	0.472	0.032	1.39412e-60	CD4CD8Tcells	Patj
6.84414e-64	3.46416	0.943	0.147	1.51502e-59	CD4CD8Tcells	Trbc2
6.35477e-62	5.81666	0.34	0.016	1.40669e-57	CD4CD8Tcells	Colq
3.04968e-61	4.41704	0.736	0.093	6.75078e-57	CD4CD8Tcells	Bcl11b
2.18304e-59	4.75851	0.528	0.046	4.83237e-55	CD4CD8Tcells	Sla2
1.15255e-58	3.64596	0.887	0.15	2.55128e-54	CD4CD8Tcells	Skap1
4.75755e-57	5.5222	0.302	0.014	1.05313e-52	CD4CD8Tcells	Tube1
6.41103e-57	5.12061	0.321	0.016	1.41914e-52	CD4CD8Tcells	5830418P13Rik
6.21517e-54	4.24274	0.774	0.123	1.37579e-49	CD4CD8Tcells	Aff3
3.61857e-53	4.71292	0.623	0.075	8.01007e-49	CD4CD8Tcells	Ntrk3
2.99659e-50	3.53674	0.811	0.135	6.63325e-46	CD4CD8Tcells	Itk
1.26156e-49	4.63072	0.623	0.081	2.7926e-45	CD4CD8Tcells	Hist3h2ba
3.54499e-48	4.4196	0.887	0.208	7.84718e-44	CD4CD8Tcells	Ssbp2
2.22173e-45	3.72043	0.66	0.097	4.91802e-41	CD4CD8Tcells	Thy1
3.04561e-45	5.23908	0.283	0.016	6.74177e-41	CD4CD8Tcells	Dgkeos
7.72844e-43	4.18073	0.811	0.184	1.71077e-38	CD4CD8Tcells	Rhoh
3.20235e-42	4.79937	0.509	0.062	7.08871e-38	CD4CD8Tcells	Xrcc6
3.2982e-42	4.7754	0.491	0.057	7.30088e-38	CD4CD8Tcells	Nck2
3.84783e-41	4.60554	0.34	0.026	8.51757e-37	CD4CD8Tcells	St8sia1
4.02449e-41	4.86124	0.509	0.064	8.90862e-37	CD4CD8Tcells	Ldhb
1.20658e-40	4.11322	0.604	0.089	2.67088e-36	CD4CD8Tcells	Trbc1
1.54322e-40	4.76973	0.792	0.19	3.41607e-36	CD4CD8Tcells	Glcci1
1.60089e-40	2.76327	0.755	0.134	3.54372e-36	CD4CD8Tcells	Cd3e
1.26538e-39	5.63833	0.302	0.022	2.80106e-35	CD4CD8Tcells	Brdt
9.59288e-39	4.18279	0.528	0.072	2.12348e-34	CD4CD8Tcells	Tespa1
1.00426e-38	2.27412	0.811	0.147	2.22303e-34	CD4CD8Tcells	Cd3g
3.92534e-38	3.52643	0.642	0.11	8.68912e-34	CD4CD8Tcells	Lck
5.71157e-36	4.17436	0.679	0.142	1.26431e-31	CD4CD8Tcells	Rnf157
1.33519e-35	4.56	0.943	0.445	2.95557e-31	CD4CD8Tcells	Mier1
3.89013e-35	4.84441	0.264	0.018	8.6112e-31	CD4CD8Tcells	Gm20033
7.62203e-35	3.46434	0.642	0.119	1.68721e-30	CD4CD8Tcells	Ppp1r16b
1.23428e-34	3.36536	0.679	0.139	2.73219e-30	CD4CD8Tcells	Ablim1
2.78529e-34	2.68183	0.736	0.147	6.16553e-30	CD4CD8Tcells	Cd3d
2.22742e-33	3.92215	0.774	0.22	4.93063e-29	CD4CD8Tcells	Rnf145
5.80344e-33	3.59512	0.566	0.095	1.28465e-28	CD4CD8Tcells	Tox
2.1742e-32	4.34381	0.302	0.027	4.81282e-28	CD4CD8Tcells	Prrt1
2.56475e-32	3.80346	0.491	0.073	5.67733e-28	CD4CD8Tcells	Cd27
5.54514e-32	4.23654	0.528	0.089	1.22747e-27	CD4CD8Tcells	Hdac7
6.38797e-32	3.9477	0.491	0.074	1.41404e-27	CD4CD8Tcells	Slc7a11
7.90808e-32	4.39875	0.377	0.043	1.75053e-27	CD4CD8Tcells	Gm5914
1.64319e-31	3.59148	0.792	0.248	3.63737e-27	CD4CD8Tcells	Stat5b
2.84722e-31	4.24279	0.547	0.1	6.3026e-27	CD4CD8Tcells	Mad1l1
4.55337e-30	3.16652	0.698	0.166	1.00793e-25	CD4CD8Tcells	Grap2
6.37516e-30	4.0786	0.585	0.12	1.41121e-25	CD4CD8Tcells	Desi1
1.55868e-29	3.06262	0.585	0.111	3.45028e-25	CD4CD8Tcells	Lat
2.59293e-29	4.52839	0.415	0.058	5.7397e-25	CD4CD8Tcells	Tmlhe
2.77241e-28	5.30387	0.283	0.027	6.137e-24	CD4CD8Tcells	Zc3h12b
8.37231e-28	5.2812	0.264	0.024	1.85329e-23	CD4CD8Tcells	Sgip1
1.20175e-27	3.19574	0.717	0.199	2.66019e-23	CD4CD8Tcells	Ets1
2.77926e-27	4.00027	0.547	0.114	6.15218e-23	CD4CD8Tcells	Arl5c
6.54347e-27	3.57316	0.66	0.176	1.44846e-22	CD4CD8Tcells	Trp53inp1
4.6761e-26	3.66836	0.717	0.233	1.0351e-21	CD4CD8Tcells	Znrf1
8.40097e-26	3.89437	0.415	0.065	1.85964e-21	CD4CD8Tcells	Trp53i11
9.62587e-26	4.56916	0.283	0.03	2.13078e-21	CD4CD8Tcells	A430035B10Rik
1.6223e-25	3.76282	0.528	0.111	3.59112e-21	CD4CD8Tcells	Spint2
2.81621e-25	3.40087	0.528	0.106	6.23395e-21	CD4CD8Tcells	Cd24a
5.48156e-25	3.71877	0.491	0.096	1.2134e-20	CD4CD8Tcells	Tapt1
3.93229e-24	4.41836	0.264	0.028	8.70452e-20	CD4CD8Tcells	Gm13919
4.12893e-24	3.01662	0.849	0.445	9.1398e-20	CD4CD8Tcells	Cux1
6.88424e-24	3.55833	0.604	0.164	1.52389e-19	CD4CD8Tcells	Strbp
2.73604e-23	4.72337	0.377	0.06	6.0565e-19	CD4CD8Tcells	Kremen1
3.97084e-23	3.50177	0.849	0.478	8.78985e-19	CD4CD8Tcells	Tcf12
4.74819e-23	3.16911	0.66	0.208	1.05106e-18	CD4CD8Tcells	Cers6
7.49978e-23	3.90063	0.547	0.136	1.66015e-18	CD4CD8Tcells	Hist3h2a
9.63708e-23	3.8732	0.396	0.067	2.13326e-18	CD4CD8Tcells	Dpp4
1.2977e-22	4.34397	0.302	0.039	2.87258e-18	CD4CD8Tcells	Tubb2b
4.8887e-22	2.4271	0.396	0.062	1.08216e-17	CD4CD8Tcells	Ly6d
1.53582e-21	3.734	0.358	0.057	3.39969e-17	CD4CD8Tcells	Acap1
2.32429e-21	4.24289	0.264	0.031	5.14504e-17	CD4CD8Tcells	Dgkg
6.88864e-21	4.23231	0.302	0.042	1.52487e-16	CD4CD8Tcells	Cep97
1.36885e-20	4.54177	0.321	0.049	3.03008e-16	CD4CD8Tcells	Utp14b
2.17645e-20	3.92952	0.434	0.091	4.81779e-16	CD4CD8Tcells	Stat5a
5.33601e-20	3.77394	0.604	0.197	1.18118e-15	CD4CD8Tcells	Zfp280d
6.29747e-20	3.44051	0.66	0.248	1.39401e-15	CD4CD8Tcells	Itpr2
1.9673e-19	3.61427	0.302	0.044	4.35481e-15	CD4CD8Tcells	Nebl
5.33387e-19	3.74568	0.415	0.088	1.18071e-14	CD4CD8Tcells	Slc35d1
6.07444e-19	2.97163	0.811	0.504	1.34464e-14	CD4CD8Tcells	Ccnd3
6.80406e-19	2.83144	0.755	0.381	1.50615e-14	CD4CD8Tcells	Edem1
1.44842e-18	3.69051	0.585	0.195	3.20622e-14	CD4CD8Tcells	Plcl1
1.59241e-18	2.61923	0.547	0.149	3.52497e-14	CD4CD8Tcells	Sept1
4.01205e-18	3.80192	0.377	0.075	8.88107e-14	CD4CD8Tcells	Dgka
4.68102e-18	3.99133	0.509	0.145	1.03619e-13	CD4CD8Tcells	Eif2ak3
1.44575e-17	3.8501	0.434	0.104	3.20031e-13	CD4CD8Tcells	Dusp10
4.37636e-17	3.04076	0.66	0.292	9.6875e-13	CD4CD8Tcells	Rmnd5a
6.85723e-17	3.08031	0.623	0.232	1.51792e-12	CD4CD8Tcells	Zeb1
8.7638e-17	2.4367	0.472	0.111	1.93995e-12	CD4CD8Tcells	Trac
1.47101e-16	3.34131	0.679	0.317	3.25623e-12	CD4CD8Tcells	Bcl2l11
4.39404e-16	3.85571	0.264	0.041	9.72665e-12	CD4CD8Tcells	Prickle1
1.04284e-15	2.66183	0.566	0.186	2.30843e-11	CD4CD8Tcells	Gramd3
2.21735e-15	2.64871	0.34	0.068	4.90832e-11	CD4CD8Tcells	Hist1h2ae
3.34434e-15	3.90199	0.396	0.1	7.40302e-11	CD4CD8Tcells	Adamts6
7.18336e-15	2.66793	0.66	0.322	1.59011e-10	CD4CD8Tcells	4932438A13Rik
8.31461e-15	1.87957	0.906	0.766	1.84052e-10	CD4CD8Tcells	Arhgap15
9.38752e-15	3.30959	0.34	0.072	2.07802e-10	CD4CD8Tcells	Plcxd2
1.0593e-14	3.91797	0.358	0.083	2.34486e-10	CD4CD8Tcells	Magi3
1.07359e-14	3.02141	0.642	0.299	2.3765e-10	CD4CD8Tcells	Nabp1
1.29621e-14	4.21107	0.264	0.046	2.8693e-10	CD4CD8Tcells	Gbp8
2.6606e-14	2.95541	0.604	0.266	5.88952e-10	CD4CD8Tcells	Cdk17
4.2357e-14	3.10499	0.302	0.06	9.37614e-10	CD4CD8Tcells	Sh2d1a
5.27393e-14	2.03894	0.849	0.735	1.16744e-09	CD4CD8Tcells	Dock2
5.68446e-14	4.05315	0.321	0.07	1.25831e-09	CD4CD8Tcells	Ahdc1
8.34476e-14	2.75163	0.698	0.425	1.8472e-09	CD4CD8Tcells	Tnrc6b
1.13433e-13	3.15966	0.321	0.069	2.51095e-09	CD4CD8Tcells	Gimap9
1.58768e-13	4.22307	0.321	0.072	3.51448e-09	CD4CD8Tcells	5330438D12Rik
2.10649e-13	1.74455	0.849	0.672	4.66292e-09	CD4CD8Tcells	Mir142hg
2.27388e-13	3.2853	0.453	0.146	5.03347e-09	CD4CD8Tcells	Sept6
2.56343e-13	3.53769	0.415	0.123	5.67441e-09	CD4CD8Tcells	Bcat2
2.7484e-13	3.69548	0.321	0.073	6.08386e-09	CD4CD8Tcells	Ankrd50
4.48878e-13	2.60281	0.623	0.311	9.93636e-09	CD4CD8Tcells	Oga
8.00557e-13	2.4326	0.623	0.299	1.77211e-08	CD4CD8Tcells	Pde4d
8.70976e-13	3.94383	0.283	0.059	1.92799e-08	CD4CD8Tcells	Pdk1
8.81586e-13	2.19945	0.736	0.516	1.95148e-08	CD4CD8Tcells	Pten
9.35528e-13	2.81361	0.585	0.273	2.07089e-08	CD4CD8Tcells	Rcsd1
9.63296e-13	2.44937	0.717	0.467	2.13235e-08	CD4CD8Tcells	Chd2
1.17484e-12	3.30827	0.472	0.166	2.60062e-08	CD4CD8Tcells	Abtb2
2.30192e-12	2.19277	0.679	0.363	5.09554e-08	CD4CD8Tcells	Pdcd4
3.94244e-12	2.91221	0.547	0.244	8.72699e-08	CD4CD8Tcells	Nfatc3
4.33138e-12	3.86695	0.415	0.133	9.58795e-08	CD4CD8Tcells	Atl2
5.42727e-12	2.49806	0.642	0.363	1.20138e-07	CD4CD8Tcells	Ap3s1
7.93634e-12	2.6204	0.679	0.449	1.75679e-07	CD4CD8Tcells	Pan3
9.32102e-12	2.58717	0.717	0.508	2.0633e-07	CD4CD8Tcells	Prkcb
9.35859e-12	1.82158	0.755	0.552	2.07162e-07	CD4CD8Tcells	Sh3kbp1
1.06609e-11	2.58648	0.566	0.27	2.35989e-07	CD4CD8Tcells	Cnot2
1.3599e-11	3.47507	0.264	0.056	3.01028e-07	CD4CD8Tcells	A630072M18Rik
1.69748e-11	3.06491	0.283	0.063	3.75755e-07	CD4CD8Tcells	Fam169b
2.00549e-11	2.66795	0.623	0.357	4.43936e-07	CD4CD8Tcells	Ppm1h
2.61908e-11	2.36009	0.358	0.097	5.7976e-07	CD4CD8Tcells	Cd28
3.28575e-11	2.45099	0.679	0.424	7.27333e-07	CD4CD8Tcells	Ikzf1
3.58951e-11	2.60664	0.566	0.278	7.94573e-07	CD4CD8Tcells	Mgat5
5.17419e-11	3.01888	0.377	0.117	1.14536e-06	CD4CD8Tcells	Abi3
7.63979e-11	3.61694	0.34	0.098	1.69114e-06	CD4CD8Tcells	Trim11
8.72939e-11	2.59776	0.453	0.168	1.93234e-06	CD4CD8Tcells	Airn
9.5728e-11	2.89078	0.415	0.144	2.11903e-06	CD4CD8Tcells	Dck
9.75222e-11	2.34394	0.528	0.233	2.15875e-06	CD4CD8Tcells	Lyst
1.24865e-10	2.62307	0.547	0.258	2.76401e-06	CD4CD8Tcells	Pag1
1.98682e-10	2.63608	0.509	0.228	4.39802e-06	CD4CD8Tcells	Ramp1
2.77695e-10	2.25507	0.642	0.403	6.14706e-06	CD4CD8Tcells	Aff1
2.82444e-10	2.66748	0.585	0.335	6.25217e-06	CD4CD8Tcells	Stk4
3.00949e-10	2.36589	0.585	0.334	6.6618e-06	CD4CD8Tcells	Cerk
3.05685e-10	3.15821	0.321	0.088	6.76664e-06	CD4CD8Tcells	Ikzf2
4.23659e-10	3.08862	0.321	0.091	9.37811e-06	CD4CD8Tcells	Rasgrp1
4.31702e-10	2.60861	0.547	0.28	9.55615e-06	CD4CD8Tcells	Cdkn1b
6.02883e-10	2.17679	0.736	0.611	1.33454e-05	CD4CD8Tcells	Nipbl
7.31165e-10	2.08473	0.642	0.388	1.61851e-05	CD4CD8Tcells	Selplg
8.14407e-10	2.09556	0.396	0.127	1.80277e-05	CD4CD8Tcells	Ikzf3
9.01794e-10	4.46475	0.264	0.066	1.99621e-05	CD4CD8Tcells	Pakap.1
9.21301e-10	2.7351	0.547	0.294	2.03939e-05	CD4CD8Tcells	Gpatch8
1.04197e-09	2.65024	0.415	0.15	2.30651e-05	CD4CD8Tcells	Arap2
1.14933e-09	1.5636	0.83	0.711	2.54415e-05	CD4CD8Tcells	Foxp1
1.89947e-09	1.90314	0.698	0.561	4.20466e-05	CD4CD8Tcells	Wasf2
2.08878e-09	1.77256	0.774	0.693	4.62372e-05	CD4CD8Tcells	Celf2
2.44816e-09	2.18181	0.623	0.415	5.41924e-05	CD4CD8Tcells	Pde3b
2.53976e-09	3.15276	0.302	0.087	5.622e-05	CD4CD8Tcells	Tnik
2.5492e-09	2.20355	0.623	0.404	5.6429e-05	CD4CD8Tcells	Creb1
2.59553e-09	2.86148	0.415	0.164	5.74546e-05	CD4CD8Tcells	Cspp1
4.70782e-09	2.2885	0.623	0.436	0.000104212	CD4CD8Tcells	Cbl
4.71318e-09	2.38772	0.547	0.294	0.000104331	CD4CD8Tcells	Fryl
4.72804e-09	2.13301	0.642	0.458	0.00010466	CD4CD8Tcells	Brd4
4.89878e-09	3.03595	0.396	0.153	0.000108439	CD4CD8Tcells	Lztfl1
4.97342e-09	3.42328	0.264	0.07	0.000110092	CD4CD8Tcells	Patz1
5.1379e-09	2.73987	0.453	0.205	0.000113733	CD4CD8Tcells	Cnot6
7.82079e-09	1.97873	0.623	0.379	0.000173121	CD4CD8Tcells	Rabgap1l
7.99521e-09	2.41674	0.547	0.315	0.000176982	CD4CD8Tcells	Nrip1
9.05269e-09	1.63802	0.736	0.634	0.00020039	CD4CD8Tcells	Slc9a9
1.01128e-08	2.4827	0.566	0.346	0.000223856	CD4CD8Tcells	Top2b
1.27898e-08	3.10292	0.283	0.083	0.000283116	CD4CD8Tcells	Kdm5b
1.31702e-08	2.62408	0.415	0.169	0.000291536	CD4CD8Tcells	Mllt3
1.32359e-08	2.68704	0.377	0.143	0.00029299	CD4CD8Tcells	Tex2
1.41555e-08	2.73459	0.491	0.255	0.000313347	CD4CD8Tcells	Msi2
1.4553e-08	2.32232	0.396	0.148	0.000322146	CD4CD8Tcells	Rgcc
1.45883e-08	2.03875	0.623	0.429	0.000322926	CD4CD8Tcells	Arhgap45
1.55195e-08	2.35597	0.472	0.224	0.000343539	CD4CD8Tcells	Tspan13
1.71544e-08	3.06734	0.434	0.197	0.000379729	CD4CD8Tcells	Hibadh
1.81741e-08	2.34784	0.491	0.24	0.000402302	CD4CD8Tcells	Plxdc2
1.83642e-08	2.60722	0.491	0.251	0.000406511	CD4CD8Tcells	Chd6
2.01127e-08	2.95485	0.302	0.094	0.000445214	CD4CD8Tcells	Pecam1
2.13632e-08	1.96072	0.302	0.09	0.000472896	CD4CD8Tcells	Hist1h2ap
2.59063e-08	3.48538	0.283	0.086	0.000573462	CD4CD8Tcells	Prep
3.20127e-08	3.10021	0.283	0.086	0.000708632	CD4CD8Tcells	Traf3ip3
3.37207e-08	3.08045	0.415	0.183	0.000746441	CD4CD8Tcells	Senp7
3.4683e-08	2.74579	0.491	0.261	0.000767742	CD4CD8Tcells	Ip6k1
4.28092e-08	3.06173	0.264	0.076	0.000947624	CD4CD8Tcells	Zbed4
6.30061e-08	3.64018	0.264	0.079	0.0013947	CD4CD8Tcells	L3mbtl3
8.85321e-08	2.88148	0.264	0.077	0.00195975	CD4CD8Tcells	Rnf125
1.12667e-07	2.86483	0.377	0.158	0.002494	CD4CD8Tcells	Clk3
1.42528e-07	2.22115	0.396	0.161	0.003155	CD4CD8Tcells	Gimap6
1.59365e-07	1.9991	0.509	0.284	0.00352771	CD4CD8Tcells	Fam107b
1.62071e-07	3.43747	0.264	0.082	0.0035876	CD4CD8Tcells	Kif21b
1.62734e-07	3.50229	0.264	0.082	0.00360228	CD4CD8Tcells	Ilvbl
1.73079e-07	2.25644	0.472	0.231	0.00383129	CD4CD8Tcells	Dusp5
1.74199e-07	3.25607	0.302	0.105	0.00385606	CD4CD8Tcells	Pvr
2.10675e-07	2.74085	0.415	0.198	0.0046635	CD4CD8Tcells	Stx6
2.21688e-07	2.51838	0.491	0.27	0.00490729	CD4CD8Tcells	Zfp292
2.43892e-07	2.64898	0.264	0.08	0.00539879	CD4CD8Tcells	Prkcq
2.48298e-07	2.83829	0.434	0.219	0.00549633	CD4CD8Tcells	Xrn1
3.25125e-07	2.89902	0.264	0.084	0.00719696	CD4CD8Tcells	Pou6f1
3.29419e-07	3.32826	0.302	0.108	0.00729202	CD4CD8Tcells	Eefsec
3.6103e-07	2.29086	0.472	0.259	0.00799176	CD4CD8Tcells	Etnk1
4.27951e-07	2.98844	0.264	0.085	0.00947313	CD4CD8Tcells	N4bp2
4.46968e-07	3.42886	0.34	0.136	0.00989409	CD4CD8Tcells	Slco3a1
5.6041e-07	3.57274	0.264	0.087	0.0124052	CD4CD8Tcells	Wdr12
7.65605e-07	2.67987	0.453	0.243	0.0169474	CD4CD8Tcells	Fhit
8.9847e-07	3.0862	0.302	0.113	0.0198885	CD4CD8Tcells	Prps2
9.25131e-07	2.59728	0.377	0.173	0.0204787	CD4CD8Tcells	Fbxl20
1.1425e-06	2.86112	0.396	0.195	0.0252903	CD4CD8Tcells	Mprip
1.2712e-06	3.09045	0.264	0.091	0.0281393	CD4CD8Tcells	Hsdl1
1.2748e-06	2.55606	0.491	0.298	0.0282189	CD4CD8Tcells	Ano6
1.41241e-06	2.50964	0.321	0.128	0.0312652	CD4CD8Tcells	A930015D03Rik
1.52926e-06	3.19389	0.264	0.092	0.0338518	CD4CD8Tcells	Rai1
1.53663e-06	1.93244	0.547	0.373	0.0340148	CD4CD8Tcells	Dnajc15
1.65342e-06	2.85996	0.321	0.13	0.0366001	CD4CD8Tcells	Arntl
1.8081e-06	2.39476	0.509	0.34	0.0400242	CD4CD8Tcells	Ndufs4
1.8964e-06	1.99313	0.34	0.139	0.0419788	CD4CD8Tcells	Itgal
2.48982e-06	2.39897	0.453	0.258	0.0551147	CD4CD8Tcells	Lbr
2.88455e-06	2.01272	0.566	0.434	0.0638525	CD4CD8Tcells	Ppp2r5c
3.69064e-06	2.736	0.283	0.109	0.081696	CD4CD8Tcells	Gm26510
3.71432e-06	1.78561	0.509	0.336	0.0822201	CD4CD8Tcells	Phf3
3.90357e-06	2.37405	0.453	0.275	0.0864094	CD4CD8Tcells	Zfp644
4.10292e-06	2.48665	0.453	0.267	0.0908222	CD4CD8Tcells	Mbtd1
4.7913e-06	2.48619	0.434	0.252	0.10606	CD4CD8Tcells	Usp3
5.10783e-06	2.71972	0.302	0.124	0.113067	CD4CD8Tcells	Sash3
5.60505e-06	2.75096	0.396	0.211	0.124073	CD4CD8Tcells	Rfx7
5.97758e-06	2.94908	0.302	0.125	0.13232	CD4CD8Tcells	Znrf3
5.99751e-06	2.29798	0.377	0.183	0.132761	CD4CD8Tcells	Prkca
6.24538e-06	1.65157	0.623	0.554	0.138248	CD4CD8Tcells	Sfpq
6.2701e-06	2.79269	0.34	0.158	0.138795	CD4CD8Tcells	Nav2
6.59202e-06	2.85262	0.264	0.098	0.145921	CD4CD8Tcells	Pip5k1b
7.52421e-06	1.88716	0.509	0.349	0.166556	CD4CD8Tcells	Gnai3
7.7503e-06	2.5928	0.472	0.305	0.171561	CD4CD8Tcells	Epb41
1.02718e-05	2.71025	0.396	0.212	0.227377	CD4CD8Tcells	Itpr1
1.09735e-05	2.83572	0.34	0.163	0.24291	CD4CD8Tcells	Hmg20a
1.10475e-05	1.50613	0.585	0.465	0.244548	CD4CD8Tcells	Osbpl8
1.25545e-05	1.91851	0.491	0.316	0.277908	CD4CD8Tcells	Limd2
1.32804e-05	1.86329	0.547	0.434	0.293976	CD4CD8Tcells	Bclaf1
1.3376e-05	2.9916	0.302	0.131	0.296091	CD4CD8Tcells	Pcmtd2
1.34173e-05	2.49328	0.321	0.146	0.297005	CD4CD8Tcells	Ubxn7
1.35599e-05	2.7342	0.283	0.117	0.300162	CD4CD8Tcells	Hectd4
1.50736e-05	2.1349	0.509	0.374	0.33367	CD4CD8Tcells	Arglu1
1.53516e-05	2.32772	0.434	0.262	0.339822	CD4CD8Tcells	Klf7
1.66897e-05	1.66262	0.604	0.544	0.369444	CD4CD8Tcells	Prrc2c
1.70033e-05	2.8969	0.34	0.166	0.376386	CD4CD8Tcells	Ppfia1
1.70893e-05	1.59776	0.642	0.576	0.37829	CD4CD8Tcells	Hivep2
1.85007e-05	2.03163	0.547	0.453	0.409531	CD4CD8Tcells	Gsk3b
2.31129e-05	2.43242	0.358	0.183	0.511627	CD4CD8Tcells	Insr
2.55234e-05	2.22024	0.472	0.314	0.564986	CD4CD8Tcells	Klf3
2.61972e-05	2.59886	0.415	0.244	0.579901	CD4CD8Tcells	Isy1
2.98378e-05	1.82509	0.547	0.419	0.660489	CD4CD8Tcells	Itpkb
3.32532e-05	2.19161	0.472	0.326	0.736092	CD4CD8Tcells	Rbm6
3.42788e-05	2.49215	0.528	0.427	0.758796	CD4CD8Tcells	Morf4l2
4.27822e-05	1.68377	0.547	0.436	0.947026	CD4CD8Tcells	Ldlrad4
4.29564e-05	1.7574	0.547	0.435	0.950882	CD4CD8Tcells	Sik3
4.66461e-05	2.60712	0.302	0.141	1	CD4CD8Tcells	Bzw2
4.83632e-05	1.91564	0.491	0.355	1	CD4CD8Tcells	Pnisr
4.87231e-05	1.91738	0.585	0.522	1	CD4CD8Tcells	Rtn3
5.50579e-05	1.61024	0.604	0.526	1	CD4CD8Tcells	Zcchc7
5.75819e-05	2.25868	0.358	0.194	1	CD4CD8Tcells	Csnk1g1
5.85976e-05	1.67543	0.566	0.499	1	CD4CD8Tcells	Atrx
5.98852e-05	1.95477	0.472	0.323	1	CD4CD8Tcells	Esyt2
7.06971e-05	2.18843	0.491	0.383	1	CD4CD8Tcells	1810026B05Rik
7.33111e-05	2.17452	0.434	0.292	1	CD4CD8Tcells	Brd1
7.73745e-05	2.17362	0.472	0.355	1	CD4CD8Tcells	Mapk1
8.24264e-05	1.81445	0.453	0.303	1	CD4CD8Tcells	Tnrc6c
8.42089e-05	2.10008	0.396	0.242	1	CD4CD8Tcells	Cog5
9.00646e-05	1.7043	0.642	0.628	1	CD4CD8Tcells	Pip4k2a
9.5506e-05	1.50607	0.566	0.486	1	CD4CD8Tcells	Ythdc1
0.000100745	1.56463	0.491	0.343	1	CD4CD8Tcells	Stap1
0.000104004	2.62317	0.377	0.229	1	CD4CD8Tcells	Kdm5a
0.000133807	1.69883	0.472	0.338	1	CD4CD8Tcells	Arhgef1
0.000137754	2.61432	0.34	0.187	1	CD4CD8Tcells	C1galt1
0.000141891	2.04111	0.472	0.356	1	CD4CD8Tcells	Epc1
0.000161503	2.01164	0.358	0.204	1	CD4CD8Tcells	Clcn3
0.000173437	2.77566	0.264	0.122	1	CD4CD8Tcells	Cplane1
0.000176533	2.05894	0.434	0.302	1	CD4CD8Tcells	Smg6
0.000183263	2.18872	0.396	0.254	1	CD4CD8Tcells	Slc25a36
0.000187737	2.88938	0.264	0.123	1	CD4CD8Tcells	Txlng
0.000199818	1.88375	0.264	0.116	1	CD4CD8Tcells	Socs1
0.000216653	2.25383	0.34	0.192	1	CD4CD8Tcells	Med14
0.000224354	2.54	0.358	0.212	1	CD4CD8Tcells	Rev3l
0.000231918	2.39104	0.396	0.26	1	CD4CD8Tcells	Pcm1
0.000237683	2.86623	0.264	0.124	1	CD4CD8Tcells	Smim13
0.000250521	2.20402	0.377	0.235	1	CD4CD8Tcells	Sla
0.000251615	2.4495	0.283	0.141	1	CD4CD8Tcells	Prpf18
0.000259111	1.64258	0.491	0.384	1	CD4CD8Tcells	5031425E22Rik
0.000265936	1.96409	0.434	0.308	1	CD4CD8Tcells	Usp15
0.000275382	1.60986	0.472	0.34	1	CD4CD8Tcells	Prdx6
0.000282492	1.96096	0.415	0.283	1	CD4CD8Tcells	Srpk2
0.000289519	2.7472	0.264	0.126	1	CD4CD8Tcells	Ankrd10
0.00029722	2.16159	0.321	0.175	1	CD4CD8Tcells	Chfr
0.00032392	2.52636	0.264	0.125	1	CD4CD8Tcells	Smad3
0.000324221	2.0969	0.415	0.285	1	CD4CD8Tcells	Senp6
0.000379088	2.1456	0.34	0.196	1	CD4CD8Tcells	4933406I18Rik
0.000442504	2.10648	0.415	0.289	1	CD4CD8Tcells	Ezr
0.000443345	1.9612	0.509	0.441	1	CD4CD8Tcells	Epsti1
0.000463396	2.07941	0.377	0.245	1	CD4CD8Tcells	Krit1
0.000482468	1.99259	0.415	0.298	1	CD4CD8Tcells	Mef2d
0.000504655	2.57352	0.302	0.164	1	CD4CD8Tcells	Tia1
0.000517103	1.96277	0.321	0.177	1	CD4CD8Tcells	Cbx4
0.000549422	2.27205	0.377	0.247	1	CD4CD8Tcells	Prrc2b
0.000558109	2.35088	0.34	0.206	1	CD4CD8Tcells	Helz
0.000566433	2.35455	0.321	0.184	1	CD4CD8Tcells	Tspyl1
0.000566585	1.78721	0.472	0.386	1	CD4CD8Tcells	Ogt
0.000582829	2.24986	0.358	0.225	1	CD4CD8Tcells	Lrrc8c
0.000592605	1.60072	0.547	0.534	1	CD4CD8Tcells	Kif5b
0.000601388	2.24467	0.358	0.23	1	CD4CD8Tcells	Ppp6r1
0.000612606	1.53209	0.604	0.605	1	CD4CD8Tcells	Rsrp1
0.000634744	2.14972	0.358	0.228	1	CD4CD8Tcells	Smarca4
0.000768893	2.61015	0.358	0.232	1	CD4CD8Tcells	Arid2
0.000797999	1.77768	0.509	0.453	1	CD4CD8Tcells	Khdrbs1
0.00091399	1.64495	0.434	0.319	1	CD4CD8Tcells	Bcl2l1
0.000993714	2.43259	0.283	0.154	1	CD4CD8Tcells	Frs2
0.001009	2.11923	0.377	0.254	1	CD4CD8Tcells	Rchy1
0.00103361	2.53245	0.415	0.321	1	CD4CD8Tcells	Zfp148
0.00108797	2.04439	0.358	0.232	1	CD4CD8Tcells	Aak1
0.00112088	1.83673	0.434	0.346	1	CD4CD8Tcells	Ube2h
0.00114994	1.89638	0.491	0.441	1	CD4CD8Tcells	Wapl
0.00115985	2.38863	0.264	0.136	1	CD4CD8Tcells	Ralgps2
0.00123376	1.889	0.415	0.311	1	CD4CD8Tcells	Anp32e
0.00125806	1.72637	0.415	0.295	1	CD4CD8Tcells	Gpr132
0.00125863	2.58146	0.283	0.159	1	CD4CD8Tcells	Mvb12b
0.00127071	1.807	0.377	0.254	1	CD4CD8Tcells	Atad2b
0.00127088	2.04214	0.453	0.374	1	CD4CD8Tcells	Dgkd
0.00128114	2.6652	0.283	0.16	1	CD4CD8Tcells	Kcnq1ot1
0.00129676	2.43234	0.302	0.178	1	CD4CD8Tcells	Uri1
0.00135224	1.68603	0.415	0.306	1	CD4CD8Tcells	Mxd4
0.00136618	1.72884	0.396	0.282	1	CD4CD8Tcells	Ccnt1
0.00150497	2.75181	0.302	0.178	1	CD4CD8Tcells	Xrcc4
0.00150827	2.01149	0.396	0.291	1	CD4CD8Tcells	Chd1
0.00150841	2.30262	0.34	0.219	1	CD4CD8Tcells	Kmt5b
0.00152733	1.66545	0.528	0.491	1	CD4CD8Tcells	Fam172a
0.00157498	1.59698	0.434	0.338	1	CD4CD8Tcells	Rbm5
0.00169722	1.61481	0.472	0.404	1	CD4CD8Tcells	Nsd1
0.00178341	1.56332	0.415	0.283	1	CD4CD8Tcells	Vps37b
0.00180636	1.66844	0.491	0.435	1	CD4CD8Tcells	Lims1
0.00181771	1.97598	0.34	0.221	1	CD4CD8Tcells	Tap2
0.00182553	2.21146	0.377	0.275	1	CD4CD8Tcells	Tubb2a
0.00182721	2.18961	0.321	0.201	1	CD4CD8Tcells	Msl2
0.00186485	2.19492	0.283	0.162	1	CD4CD8Tcells	Zyg11b
0.00192051	2.3169	0.302	0.183	1	CD4CD8Tcells	Plaa
0.00195991	2.42399	0.283	0.16	1	CD4CD8Tcells	Hist1h1e
0.00199768	2.31826	0.283	0.163	1	CD4CD8Tcells	Trim12a
0.00203511	2.41786	0.264	0.144	1	CD4CD8Tcells	Cyfip2
0.00216326	2.14983	0.358	0.252	1	CD4CD8Tcells	Ccpg1
0.00240522	1.66625	0.453	0.369	1	CD4CD8Tcells	Lipa
0.0024463	2.3785	0.321	0.21	1	CD4CD8Tcells	Synj2bp
0.00253798	2.20087	0.302	0.185	1	CD4CD8Tcells	Kdm2b
0.00264334	1.5874	0.472	0.412	1	CD4CD8Tcells	Btbd9
0.00273255	1.72316	0.434	0.354	1	CD4CD8Tcells	Mllt10
0.00283607	2.52822	0.34	0.234	1	CD4CD8Tcells	Stx16
0.00290851	1.7246	0.302	0.176	1	CD4CD8Tcells	Ldlrad3
0.00295338	1.87865	0.377	0.277	1	CD4CD8Tcells	Tlk1
0.00299337	2.72376	0.302	0.19	1	CD4CD8Tcells	Hdac8
0.00316379	1.66163	0.528	0.512	1	CD4CD8Tcells	Exoc4
0.00329035	2.55163	0.283	0.172	1	CD4CD8Tcells	Malsu1
0.00340545	2.5018	0.302	0.191	1	CD4CD8Tcells	Lrba
0.00341448	2.07813	0.396	0.31	1	CD4CD8Tcells	Cpsf6
0.00353111	2.1326	0.358	0.255	1	CD4CD8Tcells	Stim1
0.00362924	1.52187	0.528	0.504	1	CD4CD8Tcells	Diaph1
0.00371518	1.93049	0.321	0.211	1	CD4CD8Tcells	Cdk19
0.00376802	1.65183	0.434	0.368	1	CD4CD8Tcells	Kmt2c
0.00392946	1.90586	0.415	0.33	1	CD4CD8Tcells	Ets2
0.00399868	1.50845	0.434	0.36	1	CD4CD8Tcells	Rbm26
0.0043552	2.12213	0.358	0.267	1	CD4CD8Tcells	R3hdm1
0.00449767	1.68652	0.358	0.262	1	CD4CD8Tcells	Fbxw2
0.00475691	1.59071	0.491	0.481	1	CD4CD8Tcells	Srsf11
0.00481138	2.8024	0.283	0.175	1	CD4CD8Tcells	Rfx3
0.00486047	2.05341	0.321	0.22	1	CD4CD8Tcells	Kidins220
0.00503067	2.51305	0.264	0.158	1	CD4CD8Tcells	Brwd1
0.00540325	1.95452	0.453	0.406	1	CD4CD8Tcells	Rps6ka3
0.00600083	1.94062	0.358	0.268	1	CD4CD8Tcells	Tcf20
0.00614405	2.10946	0.377	0.3	1	CD4CD8Tcells	Rsbn1l
0.006328	1.9791	0.264	0.156	1	CD4CD8Tcells	D16Ertd472e
0.00664189	1.5337	0.396	0.315	1	CD4CD8Tcells	Ccnl2
0.00690883	1.79702	0.396	0.314	1	CD4CD8Tcells	Cd164
0.00721768	2.11636	0.358	0.276	1	CD4CD8Tcells	Chchd3
0.00730977	1.95991	0.321	0.224	1	CD4CD8Tcells	Rab3gap1
0.00776242	1.67355	0.434	0.38	1	CD4CD8Tcells	Strn3
0.00778444	1.52096	0.509	0.518	1	CD4CD8Tcells	Baz2b
0.00815147	2.28193	0.358	0.279	1	CD4CD8Tcells	Nt5c2
0.00836463	1.76257	0.377	0.308	1	CD4CD8Tcells	Wdr33
0.00896931	1.69499	0.377	0.303	1	CD4CD8Tcells	Dennd4c
0.00922473	1.67614	0.321	0.226	1	CD4CD8Tcells	Elk4
0.0092809	1.826	0.321	0.229	1	CD4CD8Tcells	Marf1
0.00955198	1.99246	0.377	0.299	1	CD4CD8Tcells	Kansl1l
0.00957303	1.90591	0.302	0.208	1	CD4CD8Tcells	R3hcc1l
0.00982957	1.65875	0.509	0.526	1	CD4CD8Tcells	Tsc22d4
0.00985877	1.94832	0.358	0.276	1	CD4CD8Tcells	Bcas3
0.00991496	1.83422	0.358	0.279	1	CD4CD8Tcells	Phf14
0	10.3039	0.978	0.002	0	IL17T	Il23r
0	10.0837	0.87	0.003	0	IL17T	Cd163l1
0	8.60592	0.848	0.012	0	IL17T	Trdc
0	7.46801	0.826	0.007	0	IL17T	Tcrg-C1
0	8.63549	0.783	0.004	0	IL17T	Trdv4
0	10.1817	0.609	0.001	0	IL17T	Cdh10
0	10.8382	0.435	0.001	0	IL17T	Kcnk1
1.62811e-268	10.945	0.348	0.001	3.60399e-264	IL17T	Il17re
2.90553e-214	7.47474	0.674	0.014	6.43167e-210	IL17T	Clnk
1.59767e-213	6.08715	0.565	0.008	3.5366e-209	IL17T	Adam12
1.2349e-209	7.44974	0.391	0.003	2.73358e-205	IL17T	Ly6g5b
3.11445e-204	6.94621	0.717	0.017	6.89415e-200	IL17T	Actn2
1.8388e-199	10.0916	0.283	0.001	4.07037e-195	IL17T	Tcrg-V6
1.32386e-192	8.46832	0.326	0.002	2.93049e-188	IL17T	Ret
3.76757e-184	8.04959	0.326	0.002	8.33989e-180	IL17T	Aqp3
2.61102e-180	5.49003	0.891	0.034	5.77975e-176	IL17T	Blk
2.3648e-178	7.17431	0.413	0.005	5.23473e-174	IL17T	Fstl4
1.2253e-159	6.22752	0.304	0.002	2.71233e-155	IL17T	Olfr60
2.12943e-147	7.79469	0.304	0.003	4.71371e-143	IL17T	Ablim3
7.69696e-139	6.13855	0.848	0.044	1.7038e-134	IL17T	Il1r1
9.15493e-138	6.54404	0.283	0.003	2.02654e-133	IL17T	Gm43434
5.06848e-132	5.65497	0.587	0.019	1.12196e-127	IL17T	Krt83
2.6502e-128	5.94934	0.435	0.01	5.86647e-124	IL17T	Mmp25
4.77e-127	6.20128	0.326	0.005	1.05589e-122	IL17T	Tcrg-C4
4.21612e-123	4.74368	0.957	0.065	9.3328e-119	IL17T	Cxcr6
4.87201e-114	7.11882	0.348	0.007	1.07847e-109	IL17T	Zfp462
4.00429e-112	4.57712	0.978	0.077	8.86389e-108	IL17T	St6galnac3
1.34776e-108	4.32836	0.978	0.077	2.98341e-104	IL17T	Il18r1
1.23871e-98	5.52771	0.717	0.045	2.742e-94	IL17T	Prelid2
1.93761e-98	4.76839	0.587	0.027	4.2891e-94	IL17T	Pdcd1
1.1686e-93	4.66794	0.565	0.027	2.58681e-89	IL17T	Il2ra
2.10108e-91	7.09531	0.37	0.011	4.65096e-87	IL17T	Ppp1r14c
5.38547e-91	4.92467	0.696	0.045	1.19213e-86	IL17T	Serpinb1a
1.2701e-88	5.81948	0.326	0.008	2.81148e-84	IL17T	Podnl1
1.1865e-85	4.34215	0.522	0.025	2.62643e-81	IL17T	Prrt1
1.38932e-84	4.80225	1	0.121	3.07541e-80	IL17T	Ikzf3
4.08599e-82	4.57231	0.478	0.021	9.04475e-78	IL17T	Tnfsf11
2.18522e-76	4.94167	0.261	0.006	4.83719e-72	IL17T	Hs6st2
5.95525e-73	4.7992	0.565	0.036	1.31825e-68	IL17T	Ramp3
1.22676e-71	5.08212	0.261	0.006	2.71556e-67	IL17T	Il12rb1
7.41803e-71	5.30607	0.587	0.042	1.64205e-66	IL17T	Pard3
1.47138e-65	4.39024	1	0.163	3.25705e-61	IL17T	Il7r
8.49083e-63	4.91031	0.304	0.011	1.87953e-58	IL17T	Trgv2
2.43969e-62	2.96638	0.891	0.107	5.4005e-58	IL17T	Camk4
4.57609e-61	3.62227	0.761	0.079	1.01296e-56	IL17T	Icos
6.37714e-61	3.31105	0.978	0.146	1.41164e-56	IL17T	Cd3g
2.33641e-60	4.9908	0.543	0.042	5.17189e-56	IL17T	F2r
1.45093e-59	5.04659	0.543	0.043	3.21177e-55	IL17T	Ltb4r1
3.34601e-57	4.85468	0.283	0.01	7.40673e-53	IL17T	Xkr6
5.52527e-56	3.97765	0.543	0.043	1.22307e-51	IL17T	Zap70
2.15894e-54	3.29508	0.935	0.151	4.77902e-50	IL17T	Ptprcap
2.28694e-52	2.83692	0.913	0.133	5.06238e-48	IL17T	Cd3e
5.14291e-52	6.06477	0.283	0.012	1.13843e-47	IL17T	Sdc1
5.72547e-48	2.54627	0.935	0.145	1.26739e-43	IL17T	Cd3d
7.86991e-46	3.45644	0.804	0.123	1.74208e-41	IL17T	Ltb
8.2199e-46	3.09955	0.804	0.127	1.81956e-41	IL17T	Itgb7
8.59214e-45	2.5068	0.761	0.102	1.90196e-40	IL17T	Cd247
1.01634e-43	3.99433	0.457	0.039	2.24977e-39	IL17T	Prickle1
6.94999e-43	2.89913	0.63	0.073	1.53845e-38	IL17T	Rnf125
7.79259e-43	4.04228	0.413	0.033	1.72497e-38	IL17T	Cish
1.42749e-42	3.76296	0.978	0.269	3.15989e-38	IL17T	Emb
2.99486e-42	2.74878	0.783	0.118	6.62942e-38	IL17T	Ppp1r16b
7.25157e-42	4.57775	0.283	0.015	1.60521e-37	IL17T	Prss12
1.31606e-41	2.75235	0.674	0.088	2.91324e-37	IL17T	Cd226
1.57706e-41	3.60809	0.891	0.198	3.49098e-37	IL17T	Clcn3
2.15926e-41	4.50746	0.457	0.043	4.77975e-37	IL17T	Rbpms2
4.80835e-41	2.45222	0.848	0.136	1.06438e-36	IL17T	Itk
1.73544e-40	3.49818	0.478	0.046	3.84158e-36	IL17T	Klk8
1.87598e-40	2.52972	0.696	0.095	4.15267e-36	IL17T	Bcl11b
1.25057e-39	3.29521	0.913	0.224	2.76825e-35	IL17T	Ramp1
2.90216e-39	3.46523	0.5	0.053	6.42423e-35	IL17T	Il2rb
1.60023e-38	3.71858	0.522	0.061	3.54226e-34	IL17T	Smco4
3.42931e-38	3.13011	0.63	0.088	7.59111e-34	IL17T	Rasgrp1
7.17494e-38	4.71649	0.261	0.014	1.58824e-33	IL17T	Adgrg5
3.4838e-37	4.86531	0.283	0.017	7.71173e-33	IL17T	Coro2b
9.15677e-37	3.76865	0.587	0.083	2.02694e-32	IL17T	Tasp1
1.93065e-36	3.87797	0.522	0.064	4.27368e-32	IL17T	Cers4
3.90894e-36	2.50471	0.804	0.147	8.65283e-32	IL17T	Sept1
7.19565e-36	3.65	0.717	0.134	1.59283e-31	IL17T	Dgat1
1.62661e-35	3.55089	0.63	0.1	3.60067e-31	IL17T	Tmem64
2.33484e-35	2.77214	0.696	0.11	5.16841e-31	IL17T	Lat
1.20781e-34	3.69558	0.413	0.04	2.6736e-30	IL17T	Fam102a
2.13642e-34	3.10898	0.717	0.134	4.72918e-30	IL17T	Osbpl3
1.53598e-33	2.82095	0.587	0.084	3.40005e-29	IL17T	Tnik
1.16219e-32	2.63327	0.587	0.086	2.57263e-28	IL17T	Ikzf2
1.26677e-31	2.61294	0.565	0.079	2.80411e-27	IL17T	Klrk1
3.05932e-31	2.45696	0.63	0.098	6.77211e-27	IL17T	Thy1
4.75368e-31	3.07798	0.826	0.223	1.05227e-26	IL17T	Rora
8.5475e-30	2.19007	0.609	0.095	1.89207e-25	IL17T	Tox
1.21068e-29	3.86164	0.761	0.192	2.67995e-25	IL17T	Large1
8.58185e-29	3.08158	0.696	0.151	1.89968e-24	IL17T	D16Ertd472e
1.93704e-28	3.841	0.37	0.04	4.28784e-24	IL17T	Ar
3.44519e-28	3.91132	0.283	0.023	7.62627e-24	IL17T	Tnfrsf25
7.11501e-28	1.65412	0.587	0.09	1.57498e-23	IL17T	Trbc1
1.64506e-27	3.33324	0.413	0.05	3.64151e-23	IL17T	Lax1
2.17813e-27	2.3436	0.565	0.089	4.82151e-23	IL17T	Txk
4.84664e-27	3.98824	0.304	0.029	1.07285e-22	IL17T	Il27ra
8.21426e-27	3.49991	0.609	0.125	1.81831e-22	IL17T	St3gal3
9.53263e-27	3.11645	0.652	0.143	2.11014e-22	IL17T	Smox
1.17568e-26	2.95167	0.522	0.084	2.60247e-22	IL17T	Jaml
2.69367e-26	2.16853	0.978	0.539	5.96271e-22	IL17T	S100a11
9.80604e-26	1.93024	0.826	0.199	2.17067e-21	IL17T	Ets1
5.23878e-25	2.47804	0.848	0.276	1.15966e-20	IL17T	Igf1r
6.71371e-25	3.94343	0.261	0.023	1.48615e-20	IL17T	Cpm
1.87699e-24	2.86135	0.848	0.278	4.15491e-20	IL17T	Vps37b
2.56738e-24	2.12874	1	0.51	5.68314e-20	IL17T	S100a4
3.16815e-24	2.62213	0.848	0.304	7.01302e-20	IL17T	Samsn1
3.80093e-24	3.60835	0.435	0.066	8.41373e-20	IL17T	Kbtbd11
6.01171e-24	2.20876	1	0.654	1.33075e-19	IL17T	Ifngr1
8.05165e-24	4.0866	0.283	0.028	1.78231e-19	IL17T	Cdon
6.65087e-23	2.39472	0.935	0.408	1.47224e-18	IL17T	Tmem176a
9.41583e-23	3.75204	0.304	0.034	2.08429e-18	IL17T	Slc22a15
2.06766e-22	1.99135	1	0.658	4.57698e-18	IL17T	S100a10
4.21611e-22	3.09358	0.348	0.044	9.33278e-18	IL17T	Nebl
4.76519e-22	2.91432	0.587	0.134	1.05482e-17	IL17T	Avpi1
4.82305e-22	3.12507	0.652	0.167	1.06763e-17	IL17T	March3
5.4827e-22	3.57607	0.261	0.026	1.21365e-17	IL17T	Traf4
9.81324e-22	1.92255	0.978	0.521	2.17226e-17	IL17T	Tmem176b
1.00827e-21	2.81363	0.761	0.231	2.2319e-17	IL17T	Zeb1
1.20887e-21	2.90026	0.435	0.071	2.67595e-17	IL17T	Sntb1
1.27595e-21	2.038	0.783	0.217	2.82444e-17	IL17T	Ccr2
2.12568e-21	2.33368	0.522	0.097	4.7054e-17	IL17T	Gimap3
3.16013e-21	2.14401	0.891	0.385	6.99525e-17	IL17T	Selplg
3.67625e-21	2.51238	0.674	0.181	8.13775e-17	IL17T	Il2rg
1.05549e-20	2.58997	0.478	0.087	2.33643e-16	IL17T	Tbc1d10c
2.95324e-20	3.34608	0.326	0.044	6.53729e-16	IL17T	Tmem156
5.39233e-20	3.74924	0.283	0.033	1.19365e-15	IL17T	Tnfrsf9
1.47156e-19	2.13612	0.87	0.391	3.25744e-15	IL17T	Capg
1.66734e-19	1.68574	1	0.6	3.69082e-15	IL17T	Tmsb10
3.7293e-19	2.4006	0.739	0.228	8.25519e-15	IL17T	Dusp5
8.35895e-19	2.38056	0.435	0.077	1.85034e-14	IL17T	Sh2d2a
1.00752e-18	1.81589	0.587	0.136	2.23025e-14	IL17T	Itgal
1.50055e-18	2.6545	0.63	0.184	3.32161e-14	IL17T	Cd82
1.8824e-18	2.14872	0.804	0.336	4.16688e-14	IL17T	Prdx6
2.18396e-18	2.58665	0.587	0.148	4.83441e-14	IL17T	Arap2
3.24067e-18	1.74908	1	0.66	7.17355e-14	IL17T	S100a6
4.24531e-18	2.08838	0.63	0.168	9.39742e-14	IL17T	Grap2
4.63088e-18	2.70048	0.435	0.085	1.02509e-13	IL17T	Chst11
4.68378e-18	2.37724	0.783	0.325	1.0368e-13	IL17T	Uhrf2
5.33379e-18	2.06736	0.717	0.241	1.18069e-13	IL17T	Isy1
6.65644e-18	2.54265	0.413	0.075	1.47347e-13	IL17T	Tespa1
7.22085e-18	2.40934	0.674	0.21	1.59841e-13	IL17T	Slc16a6
1.71111e-17	3.44947	0.522	0.132	3.78772e-13	IL17T	Pxdc1
4.86902e-17	2.37614	0.522	0.12	1.07781e-12	IL17T	P2ry10
9.01839e-17	2.08021	0.761	0.292	1.99631e-12	IL17T	Fryl
2.13979e-16	2.99941	0.304	0.046	4.73665e-12	IL17T	Tmem154
2.48948e-16	3.18946	0.261	0.034	5.51072e-12	IL17T	Gm36723
2.72511e-16	2.15664	0.761	0.31	6.03231e-12	IL17T	Cd164
3.8958e-16	2.78	0.5	0.127	8.62374e-12	IL17T	Ero1l
4.36348e-15	3.02513	0.457	0.114	9.65901e-11	IL17T	Ier5l
6.2485e-15	2.26957	0.587	0.187	1.38317e-10	IL17T	Ppdpf
7.56057e-15	2.29419	0.565	0.167	1.67361e-10	IL17T	Airn
8.86652e-15	2.9187	0.348	0.066	1.96269e-10	IL17T	Pkp3
1.20533e-14	1.62684	0.87	0.409	2.66811e-10	IL17T	Ckb
1.40021e-14	2.0765	0.826	0.471	3.0995e-10	IL17T	Nr3c1
2.85586e-14	3.18206	0.457	0.121	6.32173e-10	IL17T	Gstp1
7.76268e-14	2.51684	0.522	0.147	1.71835e-09	IL17T	Rgcc
1.00271e-13	2.10248	0.413	0.09	2.2196e-09	IL17T	Gimap1
1.07847e-13	2.04202	0.739	0.352	2.3873e-09	IL17T	Ppp1r11
1.35397e-13	3.37469	0.435	0.114	2.99715e-09	IL17T	Auts2
1.46889e-13	2.3103	0.5	0.142	3.25154e-09	IL17T	Tex2
1.5255e-13	2.24857	0.5	0.137	3.37684e-09	IL17T	Cd69
[truncated: 2,517 more rows]

## Sheet: STZ_9wk
p_val	avg_log2FC	pct.1	pct.2	p_val_adj	cluster	gene
0	4.72127	0.553	0.081	0	SMC	1700061H18Rik
0	2.90721	0.537	0.114	0	SMC	Acsbg2
0	3.11794	0.995	0.587	0	SMC	Ppp1r14a
0	3.29824	0.531	0.126	0	SMC	Tafa2
0	1.85751	0.585	0.182	0	SMC	Mageb18
0	2.4316	0.934	0.532	0	SMC	Cacnb2
0	2.90717	0.98	0.581	0	SMC	Kcnab1
0	2.6196	0.971	0.575	0	SMC	Bcam
0	2.59939	0.995	0.6	0	SMC	Npnt
0	2.23889	0.929	0.534	0	SMC	Mtus2
0	2.38176	0.972	0.579	0	SMC	Filip1l
0	2.88538	0.985	0.599	0	SMC	Sh3bgr
0	2.46211	0.992	0.607	0	SMC	Lmod1
0	2.71212	0.967	0.584	0	SMC	Ctnna3
0	2.72712	0.982	0.604	0	SMC	Ramp1
0	2.92421	0.906	0.533	0	SMC	Gm13889
0	2.67623	0.985	0.613	0	SMC	Synpo2
0	2.45885	0.99	0.618	0	SMC	Rcan2
0	2.36808	0.673	0.302	0	SMC	Dpp10
0	2.18021	0.976	0.605	0	SMC	Ccn3
0	2.77394	0.984	0.614	0	SMC	Enah
0	1.62703	0.787	0.42	0	SMC	AY036118
0	2.71163	0.98	0.613	0	SMC	Thsd4
0	3.31198	0.749	0.382	0	SMC	Optc
0	3.14868	0.532	0.167	0	SMC	Tas1r1
0	2.04523	0.989	0.626	0	SMC	Sost
0	2.97447	0.488	0.128	0	SMC	Acta1
0	2.92081	0.905	0.546	0	SMC	Susd5
0	2.84161	0.998	0.64	0	SMC	Cnn1
0	2.36235	0.972	0.615	0	SMC	Lmcd1
0	2.12897	0.884	0.531	0	SMC	Hspb7
0	2.59718	0.912	0.563	0	SMC	Fbxl22
0	2.43713	0.997	0.649	0	SMC	Mylk
0	2.22684	0.997	0.654	0	SMC	Itga8
0	1.80807	0.562	0.221	0	SMC	Myo5b
0	1.61871	0.824	0.484	0	SMC	Fabp4
0	2.27259	0.916	0.577	0	SMC	Kalrn
0	2.56467	0.885	0.547	0	SMC	Hspb6
0	2.29188	0.956	0.625	0	SMC	Pdlim3
0	2.61747	0.872	0.541	0	SMC	Sgcg
0	2.49658	0.988	0.66	0	SMC	Col18a1
0	2.44004	0.977	0.65	0	SMC	Postn
0	2.5522	0.972	0.647	0	SMC	Myom1
0	3.08613	0.893	0.57	0	SMC	Mylk4
0	2.06495	0.854	0.531	0	SMC	Sorbs2
0	1.8131	0.447	0.125	0	SMC	Atcay
0	2.43196	0.884	0.564	0	SMC	Sparcl1
0	2.59887	0.883	0.563	0	SMC	Myocd
0	1.93399	0.983	0.664	0	SMC	Serpine2
0	2.06187	0.994	0.675	0	SMC	Map1b
0	1.95881	0.971	0.653	0	SMC	Plcb4
0	1.80355	0.746	0.431	0	SMC	Tcap
0	3.02631	1	0.686	0	SMC	Myh11
0	1.76913	0.807	0.498	0	SMC	Sntb1
0	2.46016	0.999	0.691	0	SMC	Csrp1
0	1.97039	0.949	0.642	0	SMC	Msrb1
0	2.53996	0.898	0.592	0	SMC	Rrad
0	2.9256	0.87	0.567	0	SMC	Ptprz1
0	1.50068	0.888	0.585	0	SMC	Ccdc3
0	2.96643	0.549	0.246	0	SMC	Dgkg
0	2.74386	0.872	0.571	0	SMC	Unc5c
0	2.69988	0.851	0.551	0	SMC	Dgkb
0	3.48199	0.503	0.204	0	SMC	Pgam2
0	1.85825	0.871	0.573	0	SMC	Kcnma1
0	2.07352	0.779	0.483	0	SMC	Flnc
0	2.07558	0.998	0.703	0	SMC	Fblim1
0	1.61402	0.876	0.583	0	SMC	Hsph1
0	1.58009	0.902	0.61	0	SMC	Hdac9
0	3.46874	0.668	0.378	0	SMC	Wnt16
0	2.584	0.95	0.663	0	SMC	E030013I19Rik
0	2.29303	0.996	0.711	0	SMC	Rock1
0	2.41811	0.824	0.54	0	SMC	Dtna
0	3.79186	0.448	0.165	0	SMC	Actc1
0	1.77703	0.933	0.651	0	SMC	Olfr1033
0	2.20149	0.991	0.709	0	SMC	Ppp1r12a
0	2.2769	0.804	0.523	0	SMC	Uchl1
0	3.40816	0.746	0.471	0	SMC	Tafa1
0	1.88208	0.994	0.719	0	SMC	Tns1
0	2.28902	0.841	0.567	0	SMC	Filip1
0	2.71174	0.826	0.552	0	SMC	Erbb4
0	1.98575	0.971	0.7	0	SMC	Mustn1
0	2.06247	0.998	0.728	0	SMC	Actn1
0	2.62031	0.689	0.42	0	SMC	Acan
0	3.33544	0.491	0.225	0	SMC	Gm12295
0	2.0702	0.872	0.607	0	SMC	Hbegf
0	1.80755	0.795	0.535	0	SMC	Tinagl1
0	1.81157	0.969	0.71	0	SMC	Ncam1
0	1.78754	0.991	0.736	0	SMC	Actn4
0	1.62789	0.986	0.733	0	SMC	Cyb5r3
0	3.17412	1	0.748	0	SMC	Tpm2
0	1.97399	0.49	0.239	0	SMC	Tnnc1
0	1.7459	0.515	0.266	0	SMC	Slc22a2
0	2.40607	0.873	0.625	0	SMC	Npy1r
0	2.4853	1	0.755	0	SMC	Tpm1
0	1.64721	0.815	0.57	0	SMC	Inhba
0	2.86177	0.736	0.492	0	SMC	2200002D01Rik
0	1.68573	0.367	0.125	0	SMC	Lrp2
0	2.39034	0.761	0.522	0	SMC	Sncg
0	1.99412	0.651	0.413	0	SMC	Kcnq3
0	2.24886	0.948	0.712	0	SMC	Gucy1a1
0	2.80191	0.433	0.2	0	SMC	Gm34237
0	1.87182	0.826	0.594	0	SMC	Tnfrsf12a
0	2.04924	0.738	0.506	0	SMC	Wdr95
0	2.55927	0.629	0.398	0	SMC	Ankrd1
0	1.81234	0.999	0.769	0	SMC	Pcdh7
0	2.59384	0.846	0.616	0	SMC	Ryr2
0	2.51401	0.743	0.514	0	SMC	Sphkap
0	2.44571	0.811	0.584	0	SMC	Emb
0	2.07224	0.999	0.774	0	SMC	Dmd
0	1.75697	0.754	0.529	0	SMC	Palld
0	3.4779	0.741	0.517	0	SMC	Pln
0	1.54529	0.656	0.434	0	SMC	Stbd1
0	2.08566	0.752	0.534	0	SMC	Dsp
0	3.41593	0.607	0.39	0	SMC	Nkx6-1
0	1.6905	0.634	0.42	0	SMC	Unc13c
0	2.08081	0.725	0.511	0	SMC	Ano1
0	2.91254	1	0.789	0	SMC	Csrp2
0	2.2287	0.489	0.278	0	SMC	Galnt14
0	2.87656	0.825	0.616	0	SMC	Itih4
0	2.64528	0.791	0.585	0	SMC	Actg2
0	2.02589	0.731	0.525	0	SMC	Nes
0	2.95475	0.804	0.599	0	SMC	Kcnq5
0	2.22271	0.626	0.421	0	SMC	5430431A17Rik
0	2.35995	0.999	0.796	0	SMC	Hspb1
0	2.05513	0.799	0.597	0	SMC	Itga5
0	2.07824	0.711	0.512	0	SMC	Rgs7bp
0	2.14846	0.443	0.248	0	SMC	Bdh1
0	1.54919	0.728	0.533	0	SMC	Serpine1
0	2.92265	0.329	0.135	0	SMC	Gm26633
0	1.53593	0.996	0.802	0	SMC	Mfge8
0	1.98562	0.563	0.372	0	SMC	Nrtn
0	2.74023	1	0.809	0	SMC	Myl9
0	2.05833	0.999	0.815	0	SMC	Lpp
0	3.03589	0.58	0.396	0	SMC	Igfbp2
0	2.95545	1	0.822	0	SMC	Tagln
0	2.79826	0.373	0.196	0	SMC	P2rx1
0	2.7236	0.719	0.545	0	SMC	Rgs4
0	2.79126	0.82	0.646	0	SMC	Cdh6
0	2.23287	0.637	0.464	0	SMC	Sema3a
0	3.01277	0.513	0.343	0	SMC	Gm13861
0	1.72217	0.269	0.102	0	SMC	Kif28
0	2.59215	0.48	0.317	0	SMC	Tceal6
0	2.16131	1	0.838	0	SMC	Cald1
0	1.69827	0.434	0.275	0	SMC	B230312C02Rik
0	2.93961	0.491	0.333	0	SMC	Casq1
0	1.68185	0.692	0.536	0	SMC	Psd
0	1.75059	0.647	0.493	0	SMC	Dlgap1
0	2.31961	0.763	0.613	0	SMC	Tes
0	3.67136	0.714	0.565	0	SMC	Des
0	3.76371	0.508	0.36	0	SMC	Ckm
0	2.1311	0.522	0.375	0	SMC	Ppef1
0	2.38156	1	0.854	0	SMC	Flna
0	2.40193	0.479	0.341	0	SMC	Myoz2
0	2.09348	0.669	0.537	0	SMC	Tnnt2
0	2.14028	0.592	0.465	0	SMC	Ccdc42
0	2.47075	0.554	0.431	0	SMC	Art3
0	1.81938	0.279	0.159	0	SMC	Sprr1a
0	2.27368	0.552	0.44	0	SMC	Slc22a1
0	2.90585	0.543	0.435	0	SMC	Actn2
0	1.54356	0.61	0.502	0	SMC	Kctd16
0	1.62774	0.444	0.338	0	SMC	Nptx2
0	2.68329	0.538	0.448	0	SMC	Il17b
0	2.17034	0.6	0.518	0	SMC	Wif1
0	1.8113	0.51	0.43	0	SMC	Pla2g4e
0	2.48142	0.5	0.425	0	SMC	Bex4
0	2.25069	1	0.927	0	SMC	Dstn
0	3.00908	1	0.937	0	SMC	Acta2
0	1.55483	1	0.968	0	SMC	Vim
5.95675e-265	2.63664	0.503	0.499	1.19135e-261	SMC	Tnc
8.49819e-155	2.49023	0.45	0.508	1.69964e-151	SMC	Abra
3.44301e-131	1.60684	0.516	0.507	6.88601e-128	SMC	Crlf1
9.48479e-125	2.80694	0.417	0.418	1.89696e-121	SMC	Tesc
0	2.28036	0.577	0.041	0	Fibroblast	Cxcl14
0	9.12571	0.535	0.022	0	Fibroblast	Dact2
0	5.22154	0.529	0.024	0	Fibroblast	Rspo2
0	1.84128	0.016	0.486	0	Fibroblast	Upk1b
0	5.60861	0.604	0.137	0	Fibroblast	Wnt2
0	2.15683	0.061	0.524	0	Fibroblast	Muc16
0	6.95176	0.498	0.063	0	Fibroblast	9630002D21Rik
0	9.19133	0.555	0.124	0	Fibroblast	Slc6a2
0	5.77266	0.472	0.043	0	Fibroblast	Styk1
0	7.71102	0.865	0.437	0	Fibroblast	Pi16
0	6.17611	0.784	0.358	0	Fibroblast	Scn7a
0	7.9402	0.894	0.479	0	Fibroblast	Cygb
0	2.38712	0.588	0.176	0	Fibroblast	Hp
0	3.47942	0.524	0.114	0	Fibroblast	Efcc1
0	7.71402	0.927	0.519	0	Fibroblast	Dpt
0	8.07617	0.934	0.527	0	Fibroblast	Abca8a
0	5.84519	0.612	0.215	0	Fibroblast	Myoc
0	5.2969	0.497	0.1	0	Fibroblast	Gjb5
0	5.4136	0.414	0.029	0	Fibroblast	Has2
0	6.90052	0.947	0.563	0	Fibroblast	Serpinf1
0	8.4015	0.749	0.372	0	Fibroblast	Dpep1
0	8.64374	0.875	0.506	0	Fibroblast	Clec3b
0	6.44058	0.487	0.129	0	Fibroblast	Ackr1
0	4.60274	0.186	0.536	0	Fibroblast	H19
0	5.96427	0.928	0.586	0	Fibroblast	Lum
0	6.85581	0.92	0.579	0	Fibroblast	Fbln1
0	7.04826	0.529	0.19	0	Fibroblast	Gng13
0	7.09978	0.849	0.513	0	Fibroblast	Smoc2
0	8.89004	0.331	0.001	0	Fibroblast	Gm49257
0	6.72167	0.855	0.525	0	Fibroblast	Bicc1
0	5.84088	0.626	0.298	0	Fibroblast	Arhgap20
0	6.52977	0.992	0.675	0	Fibroblast	Dcn
0	5.11794	0.608	0.293	0	Fibroblast	Apod
0	5.25763	0.619	0.307	0	Fibroblast	Fndc1
0	6.5913	0.536	0.228	0	Fibroblast	Gm38407
0	8.00028	0.472	0.166	0	Fibroblast	Ccl11
0	5.20779	0.891	0.587	0	Fibroblast	Pcolce
0	3.88823	0.501	0.2	0	Fibroblast	Adam23
0	7.81952	0.599	0.302	0	Fibroblast	Ptgfr
0	4.77964	0.97	0.675	0	Fibroblast	Igfbp4
0	4.34409	0.142	0.436	0	Fibroblast	Bmp7
0	7.44536	0.596	0.302	0	Fibroblast	Srpx
0	7.75324	0.833	0.543	0	Fibroblast	C3
0	5.83318	0.722	0.435	0	Fibroblast	Entpd2
0	5.14256	0.869	0.584	0	Fibroblast	Mmp2
0	3.48529	0.726	0.442	0	Fibroblast	Gda
0	5.67516	0.803	0.521	0	Fibroblast	Pdgfra
0	6.50796	0.727	0.445	0	Fibroblast	Olfml3
0	5.26885	0.808	0.538	0	Fibroblast	Ly6a
0	6.59651	0.512	0.242	0	Fibroblast	Has1
0	3.12538	0.821	0.554	0	Fibroblast	Marcks
0	8.34418	0.715	0.451	0	Fibroblast	Svep1
0	2.92716	0.546	0.283	0	Fibroblast	Fxyd3
0	2.11354	0.559	0.299	0	Fibroblast	Hs3st5
0	3.34112	0.842	0.585	0	Fibroblast	Rnase4
0	4.38997	0.508	0.252	0	Fibroblast	Gm30624
0	7.80387	0.727	0.472	0	Fibroblast	Scara5
0	6.63292	0.681	0.432	0	Fibroblast	Abca8b
0	3.19588	0.748	0.5	0	Fibroblast	Dapk1
0	1.82619	0.532	0.285	0	Fibroblast	Kirrel3
0	7.20161	0.418	0.172	0	Fibroblast	Fgf10
0	3.11363	0.613	0.369	0	Fibroblast	Anxa8
0	2.11765	0.329	0.087	0	Fibroblast	Fam167a
0	2.45749	0.375	0.135	0	Fibroblast	Megf10
0	6.01546	0.618	0.383	0	Fibroblast	Lgi2
0	5.8207	0.636	0.401	0	Fibroblast	Itm2a
0	7.32232	0.632	0.399	0	Fibroblast	Dio2
0	2.50692	0.473	0.24	0	Fibroblast	Nell2
0	2.85612	0.458	0.226	0	Fibroblast	Shox2
0	8.81912	0.535	0.304	0	Fibroblast	Ebf2
0	7.85935	0.598	0.371	0	Fibroblast	Ndufa4l2
0	4.81605	0.643	0.417	0	Fibroblast	Ccl19
0	7.5835	0.638	0.414	0	Fibroblast	Fmod
0	3.83742	0.775	0.552	0	Fibroblast	Emp1
0	3.20036	0.787	0.565	0	Fibroblast	Thbd
0	3.08114	0.835	0.613	0	Fibroblast	Pltp
0	6.64456	0.73	0.508	0	Fibroblast	Tspan11
0	8.38233	0.613	0.392	0	Fibroblast	Inmt
0	4.36513	0.373	0.153	0	Fibroblast	Lin7a
0	4.29184	0.798	0.579	0	Fibroblast	Tgfbi
0	2.69093	0.251	0.035	0	Fibroblast	AI661453
0	4.62386	0.569	0.353	0	Fibroblast	Gm29683
0	5.66463	0.551	0.341	0	Fibroblast	Dnm1
0	7.85724	0.545	0.336	0	Fibroblast	Opcml
0	3.88829	0.543	0.334	0	Fibroblast	Gpha2
0	4.17397	0.776	0.568	0	Fibroblast	Akap12
0	8.2484	0.526	0.318	0	Fibroblast	Cilp
0	4.30859	0.696	0.488	0	Fibroblast	Ackr3
0	4.78745	0.819	0.612	0	Fibroblast	Cd34
0	4.17097	0.615	0.409	0	Fibroblast	Spock2
0	5.5797	0.565	0.359	0	Fibroblast	Hhip
0	4.55836	0.698	0.492	0	Fibroblast	Nid1
0	6.19521	0.502	0.299	0	Fibroblast	Spon2
0	5.16971	0.713	0.511	0	Fibroblast	Wnt5a
0	3.2034	0.725	0.526	0	Fibroblast	Gas1
0	5.32361	0.66	0.462	0	Fibroblast	Gfra2
0	4.58077	0.502	0.304	0	Fibroblast	Atp6v0a4
0	6.38495	0.711	0.513	0	Fibroblast	Cpxm1
0	4.00144	0.631	0.435	0	Fibroblast	Aldh3a1
0	3.38092	0.652	0.457	0	Fibroblast	Cdon
0	4.18164	0.608	0.415	0	Fibroblast	Medag
0	3.19904	0.583	0.39	0	Fibroblast	Csmd1
0	4.48283	0.687	0.495	0	Fibroblast	C1s1
0	6.42251	0.732	0.54	0	Fibroblast	Il33
0	5.03856	0.123	0.314	0	Fibroblast	Krt19
0	5.65921	0.493	0.302	0	Fibroblast	Ackr2
0	4.65375	0.301	0.111	0	Fibroblast	Tmem200a
0	6.03755	0.581	0.391	0	Fibroblast	Pex5l
0	3.53038	0.715	0.525	0	Fibroblast	Cyp1b1
0	4.15145	0.695	0.506	0	Fibroblast	Fmo1
0	2.32574	0.717	0.529	0	Fibroblast	Fmnl2
0	2.84323	0.677	0.491	0	Fibroblast	Mgst1
0	6.96064	0.734	0.548	0	Fibroblast	Igfbp6
0	3.00335	0.762	0.577	0	Fibroblast	Pcolce2
0	4.72093	0.545	0.363	0	Fibroblast	F3
0	3.13195	0.812	0.631	0	Fibroblast	Lpl
0	4.36892	0.737	0.556	0	Fibroblast	Igf1
0	4.16904	0.73	0.549	0	Fibroblast	C1ra
0	4.35089	0.677	0.498	0	Fibroblast	Ly6c1
0	3.37606	0.434	0.255	0	Fibroblast	Gdf6
0	4.89578	0.649	0.472	0	Fibroblast	Gpm6b
0	4.47617	0.623	0.446	0	Fibroblast	Itih5
0	2.31733	0.458	0.281	0	Fibroblast	Col11a1
0	2.65787	0.774	0.598	0	Fibroblast	Ablim1
0	5.68433	0.626	0.452	0	Fibroblast	Angptl1
0	1.60566	0.68	0.507	0	Fibroblast	Ramp2
0	4.96719	0.389	0.216	0	Fibroblast	Trim67
0	4.68829	0.702	0.53	0	Fibroblast	Pcsk6
0	4.20644	0.814	0.642	0	Fibroblast	Cxcl12
0	7.4411	0.528	0.357	0	Fibroblast	Sult5a1
0	3.77325	0.527	0.356	0	Fibroblast	Fscn1
0	2.98976	0.585	0.414	0	Fibroblast	Qpct
0	3.94652	0.633	0.463	0	Fibroblast	Bace2
0	7.74584	0.67	0.502	0	Fibroblast	Hsd11b1
0	2.84309	0.619	0.453	0	Fibroblast	Rbfox1
0	2.23278	0.801	0.636	0	Fibroblast	Atf5
0	3.25316	0.701	0.536	0	Fibroblast	Galnt15
0	1.6282	0.687	0.527	0	Fibroblast	Heg1
0	6.46268	0.611	0.451	0	Fibroblast	Cfb
0	4.32746	0.712	0.552	0	Fibroblast	Tshz2
0	3.87943	0.541	0.382	0	Fibroblast	Radil
0	4.75276	0.697	0.538	0	Fibroblast	Flt3l
0	2.95748	0.551	0.393	0	Fibroblast	Slfn5
0	2.95824	0.79	0.633	0	Fibroblast	Ar
0	6.91366	0.527	0.37	0	Fibroblast	Meox2
0	4.01478	0.529	0.374	0	Fibroblast	Ngf
0	2.36102	0.552	0.397	0	Fibroblast	Rab3il1
0	7.78383	0.371	0.216	0	Fibroblast	Epyc
0	2.9619	0.707	0.552	0	Fibroblast	Add3
0	3.77856	0.728	0.574	0	Fibroblast	Matn2
0	4.39133	0.984	0.832	0	Fibroblast	Serping1
0	2.20325	0.848	0.696	0	Fibroblast	Tuba1a
0	2.62447	0.671	0.52	0	Fibroblast	Timp1
0	6.68781	0.594	0.443	0	Fibroblast	Angptl7
0	6.04773	0.666	0.516	0	Fibroblast	Aldh1a1
0	7.32611	0.664	0.515	0	Fibroblast	Lsamp
0	5.309	0.597	0.449	0	Fibroblast	Lpar1
0	4.86284	0.647	0.5	0	Fibroblast	Tmeff2
0	3.5821	0.536	0.389	0	Fibroblast	Arhgap28
0	2.23377	0.872	0.727	0	Fibroblast	Cebpd
0	6.75457	0.551	0.406	0	Fibroblast	Steap4
0	5.09171	0.548	0.404	0	Fibroblast	Lbp
0	4.31615	0.655	0.511	0	Fibroblast	Xdh
0	5.78192	0.658	0.515	0	Fibroblast	Gfpt2
0	4.35102	0.625	0.482	0	Fibroblast	Pdgfrl
0	5.82488	0.545	0.403	0	Fibroblast	Prr16
0	1.5354	0.933	0.792	0	Fibroblast	Apoe
0	2.04636	0.752	0.611	0	Fibroblast	Nbl1
0	3.75663	0.635	0.496	0	Fibroblast	Robo1
0	5.80909	0.591	0.452	0	Fibroblast	Pdpn
0	3.35379	0.39	0.252	0	Fibroblast	Crym
0	2.13412	0.6	0.464	0	Fibroblast	Negr1
0	5.99136	0.72	0.585	0	Fibroblast	Cpxm2
0	3.3823	0.829	0.694	0	Fibroblast	Lama2
0	5.00032	0.544	0.41	0	Fibroblast	Esrrg
0	5.94924	0.756	0.622	0	Fibroblast	Igfbp5
0	3.8689	0.633	0.5	0	Fibroblast	Clec11a
0	2.26846	0.628	0.496	0	Fibroblast	Stxbp6
0	4.25442	0.634	0.503	0	Fibroblast	Col16a1
0	8.65291	0.595	0.464	0	Fibroblast	Ms4a4d
0	2.98472	0.655	0.525	0	Fibroblast	Papss2
0	6.72244	0.524	0.395	0	Fibroblast	Lamb1
0	3.11061	0.699	0.571	0	Fibroblast	Slc43a3
0	5.94961	0.51	0.382	0	Fibroblast	Ces1d
0	2.71761	0.55	0.423	0	Fibroblast	Cyp2s1
0	5.41599	0.568	0.441	0	Fibroblast	Prlr
0	2.49958	0.627	0.501	0	Fibroblast	Bmp4
0	4.13596	0.694	0.57	0	Fibroblast	Angptl4
0	6.61652	0.562	0.439	0	Fibroblast	Gm26512
0	4.96893	0.58	0.458	0	Fibroblast	Sdk1
0	3.88157	0.495	0.374	0	Fibroblast	Ak8
0	4.27035	0.539	0.421	0	Fibroblast	Bmper
0	3.58154	0.532	0.417	0	Fibroblast	S100b
0	3.56516	0.71	0.595	0	Fibroblast	Fbln2
0	5.53065	0.712	0.597	0	Fibroblast	Gdf10
0	1.97671	0.754	0.639	0	Fibroblast	Islr
0	4.56383	0.625	0.511	0	Fibroblast	Fxyd6
0	4.78688	0.62	0.506	0	Fibroblast	Flrt2
0	2.19971	0.776	0.662	0	Fibroblast	Tnxb
0	2.13223	0.593	0.481	0	Fibroblast	Irf7
0	3.04963	0.573	0.461	0	Fibroblast	Slit2
0	6.25859	0.569	0.461	0	Fibroblast	Podn
0	2.49288	0.878	0.771	0	Fibroblast	Plpp3
0	2.92812	0.554	0.452	0	Fibroblast	Tchh
0	2.04463	0.841	0.74	0	Fibroblast	Htra3
0	2.852	0.975	0.875	0	Fibroblast	Tmsb10
0	2.93508	0.72	0.622	0	Fibroblast	Sfrp1
0	2.02032	0.876	0.778	0	Fibroblast	S100a10
0	2.10526	0.745	0.647	0	Fibroblast	Naaladl2
0	6.54623	0.658	0.563	0	Fibroblast	Gpx3
0	3.87034	0.593	0.498	0	Fibroblast	Col12a1
0	4.16983	0.61	0.516	0	Fibroblast	Efemp1
0	5.02724	0.566	0.473	0	Fibroblast	Mdk
0	2.27474	0.633	0.544	0	Fibroblast	Man1a
0	2.31022	0.662	0.574	0	Fibroblast	Epha3
0	6.80789	0.633	0.545	0	Fibroblast	Adamtsl2
0	3.65762	0.574	0.486	0	Fibroblast	Cntn4
0	3.77974	0.588	0.5	0	Fibroblast	Ism1
0	5.09618	0.538	0.451	0	Fibroblast	G0s2
0	2.22588	0.76	0.673	0	Fibroblast	Nrp1
0	3.65808	0.582	0.496	0	Fibroblast	Dact1
0	4.52537	0.526	0.441	0	Fibroblast	Fras1
0	2.56905	0.622	0.538	0	Fibroblast	Kcnt2
0	3.95123	0.632	0.55	0	Fibroblast	Cd248
0	2.25692	0.622	0.541	0	Fibroblast	Lgals3bp
0	2.39091	0.977	0.897	0	Fibroblast	Ifitm3
0	1.83836	0.757	0.677	0	Fibroblast	Prrx1
0	4.03188	0.687	0.608	0	Fibroblast	Gpc3
0	2.03829	0.534	0.456	0	Fibroblast	Camk4
0	3.45489	0.856	0.779	0	Fibroblast	Col14a1
0	5.01794	0.638	0.563	0	Fibroblast	Vegfd
0	2.07526	0.907	0.832	0	Fibroblast	Mfap5
0	1.91166	0.689	0.614	0	Fibroblast	Glul
0	3.25573	0.768	0.694	0	Fibroblast	Adamts5
0	1.86959	0.823	0.749	0	Fibroblast	Meg3
0	4.84618	0.57	0.498	0	Fibroblast	Stc2
0	5.20381	0.538	0.468	0	Fibroblast	Aspa
0	1.90353	0.941	0.871	0	Fibroblast	Selenop
0	2.56479	0.768	0.699	0	Fibroblast	Nr2f2
0	6.83836	0.582	0.513	0	Fibroblast	Igfbp3
0	1.71363	0.56	0.493	0	Fibroblast	F830016B08Rik
0	3.99039	0.551	0.484	0	Fibroblast	Zfp521
0	7.52987	0.347	0.281	0	Fibroblast	Slc36a2
0	3.80647	0.67	0.605	0	Fibroblast	Grem2
0	2.52845	0.763	0.698	0	Fibroblast	Phlda1
0	3.93809	0.624	0.56	0	Fibroblast	Cdh11
0	3.3438	0.646	0.583	0	Fibroblast	Ntrk2
0	1.96518	0.765	0.702	0	Fibroblast	Zfpm2
0	2.5734	0.774	0.711	0	Fibroblast	Adamts2
0	2.49895	0.935	0.873	0	Fibroblast	Col1a1
0	2.01123	0.732	0.67	0	Fibroblast	Crispld2
0	1.86963	0.643	0.584	0	Fibroblast	Spon1
0	2.52094	0.614	0.555	0	Fibroblast	Ifit1
0	4.25493	0.642	0.585	0	Fibroblast	Serpina3n
0	2.17148	0.925	0.868	0	Fibroblast	Cfh
0	2.08699	0.658	0.602	0	Fibroblast	Cdk14
0	4.24032	0.637	0.582	0	Fibroblast	Prg4
0	5.45445	0.435	0.489	0	Fibroblast	Lgi1
0	4.23567	0.587	0.64	0	Fibroblast	Cd55
0	5.97857	0.534	0.481	0	Fibroblast	Thy1
0	1.73298	0.567	0.619	0	Fibroblast	AW112010
0	4.47263	0.54	0.489	0	Fibroblast	Adgrd1
0	1.93495	0.568	0.519	0	Fibroblast	C4b
0	5.34046	0.696	0.649	0	Fibroblast	Mmp3
0	4.79618	0.532	0.487	0	Fibroblast	Ly6k
0	2.68848	0.679	0.634	0	Fibroblast	Col4a4
0	3.32355	0.642	0.598	0	Fibroblast	Tmem204
0	5.88129	0.515	0.475	0	Fibroblast	Cdh12
0	2.06843	0.616	0.576	0	Fibroblast	Oasl2
0	4.33536	0.612	0.572	0	Fibroblast	Col6a6
0	4.01263	0.644	0.605	0	Fibroblast	Penk
0	5.47404	0.622	0.584	0	Fibroblast	Cpz
0	6.44422	0.497	0.459	0	Fibroblast	Foxd1
0	2.87712	0.582	0.544	0	Fibroblast	Lgals9
0	3.09108	0.635	0.6	0	Fibroblast	Vit
0	6.87708	0.527	0.562	0	Fibroblast	Sorcs2
0	1.70099	0.871	0.837	0	Fibroblast	Plxdc2
0	1.63935	0.802	0.769	0	Fibroblast	Abcc9
0	4.42271	0.997	0.967	0	Fibroblast	Gsn
0	3.22511	0.751	0.721	0	Fibroblast	Cp
0	7.52666	0.454	0.424	0	Fibroblast	C7
0	5.56029	0.452	0.482	0	Fibroblast	Trdn
0	3.18141	0.627	0.598	0	Fibroblast	Rftn1
0	1.94931	0.834	0.862	0	Fibroblast	Gas6
0	3.96058	0.53	0.502	0	Fibroblast	Emilin2
0	7.04288	0.521	0.494	0	Fibroblast	Tmem100
0	1.70902	0.751	0.726	0	Fibroblast	Rbms1
0	6.03858	0.581	0.603	0	Fibroblast	Plcxd3
0	2.51928	0.613	0.592	0	Fibroblast	Gas7
0	1.69102	0.823	0.802	0	Fibroblast	Tcf4
0	2.56281	0.606	0.587	0	Fibroblast	Adh1
0	2.44679	0.614	0.631	0	Fibroblast	Icam1
0	2.07203	0.475	0.458	0	Fibroblast	Ifi211
0	2.36517	0.981	0.965	0	Fibroblast	Col1a2
0	4.01048	0.536	0.52	0	Fibroblast	Pcdh19
0	4.38738	0.528	0.544	0	Fibroblast	Cdh9
0	1.80583	0.897	0.881	0	Fibroblast	Sptbn1
0	2.02453	0.566	0.582	0	Fibroblast	Gbp6
0	8.38489	0.57	0.556	0	Fibroblast	Ccbe1
0	5.6427	0.361	0.37	0	Fibroblast	Neto1
0	2.31064	0.98	0.972	0	Fibroblast	Timp2
0	1.69895	0.828	0.835	0	Fibroblast	Mfap4
0	2.07949	0.801	0.797	0	Fibroblast	Abi3bp
0	1.73885	0.832	0.829	0	Fibroblast	Fbn1
0	1.5742	0.989	0.987	0	Fibroblast	Mgp
0	2.69175	0.998	0.999	0	Fibroblast	Cst3
0	4.77602	0.555	0.554	0	Fibroblast	Aox3
9.83593e-307	7.46804	0.35	0.388	1.96719e-303	Fibroblast	Mlana
4.44795e-306	6.95259	0.462	0.346	8.89591e-303	Fibroblast	AI507597
1.31589e-302	4.1602	0.642	0.511	2.63178e-299	Fibroblast	Ptn
1.84426e-302	1.7388	0.58	0.481	3.68853e-299	Fibroblast	Cxcl16
1.45573e-299	2.63848	0.543	0.345	2.91145e-296	Fibroblast	Ptgs2os
8.42817e-299	4.32305	0.564	0.586	1.68563e-295	Fibroblast	Naalad2
1.92941e-298	3.50012	0.331	0.126	3.85883e-295	Fibroblast	Matn3
3.50097e-293	4.82713	0.543	0.504	7.00194e-290	Fibroblast	Sfrp4
2.15805e-292	5.02644	0.518	0.474	4.31611e-289	Fibroblast	Tmem119
1.43711e-291	3.15431	0.554	0.504	2.87422e-288	Fibroblast	Cntn6
2.69906e-286	2.19088	0.56	0.626	5.39811e-283	Fibroblast	Abca9
4.11582e-281	6.32917	0.475	0.448	8.23165e-278	Fibroblast	Lrrn4cl
1.38744e-279	6.55435	0.425	0.093	2.77488e-276	Fibroblast	Pcsk1n
5.18526e-278	6.48568	0.484	0.513	1.03705e-274	Fibroblast	Slc1a3
1.04393e-277	3.20741	0.515	0.418	2.08787e-274	Fibroblast	Acp5
2.12759e-272	4.41565	0.529	0.419	4.25517e-269	Fibroblast	Pappa
2.52431e-267	3.46896	0.524	0.491	5.04862e-264	Fibroblast	Angpt1
7.49045e-266	5.1203	0.524	0.436	1.49809e-262	Fibroblast	C2
1.27699e-265	4.63776	0.372	0.223	2.55398e-262	Fibroblast	Plac8
8.31096e-265	4.4424	0.542	0.604	1.66219e-261	Fibroblast	Gpnmb
1.43548e-260	6.601	0.478	0.439	2.87096e-257	Fibroblast	Egflam
9.01402e-258	2.74706	0.595	0.586	1.8028e-254	Fibroblast	Dclk1
1.85434e-256	3.98083	0.524	0.437	3.70868e-253	Fibroblast	Adgrg2
1.9021e-255	3.89149	0.554	0.556	3.8042e-252	Fibroblast	Gpr39
3.58645e-255	3.60022	0.522	0.414	7.1729e-252	Fibroblast	Lurap1l
4.23673e-255	6.37432	0.453	0.562	8.47346e-252	Fibroblast	Has2os
1.62446e-252	7.25955	0.277	0.075	3.24891e-249	Fibroblast	C1qtnf3
6.20526e-250	5.90462	0.511	0.506	1.24105e-246	Fibroblast	Gsta3
2.28847e-249	2.34917	0.546	0.431	4.57694e-246	Fibroblast	Ifit3
2.73467e-249	2.14686	0.6	0.437	5.46933e-246	Fibroblast	Kcnj8
1.04342e-248	3.86815	0.473	0.336	2.08684e-245	Fibroblast	Padi4
7.38858e-248	2.93408	0.563	0.451	1.47772e-244	Fibroblast	Fzd4
2.47594e-247	3.7996	0.44	0.378	4.95188e-244	Fibroblast	Grin2a
2.61726e-246	2.62285	0.505	0.342	5.23452e-243	Fibroblast	Ror2
5.36654e-243	1.51919	0.582	0.248	1.07331e-239	Fibroblast	Gm12758
1.23e-241	3.22908	0.555	0.573	2.46e-238	Fibroblast	Galnt17
1.28832e-240	1.70442	0.684	0.669	2.57664e-237	Fibroblast	Mir99ahg
1.25727e-239	4.18699	0.445	0.412	2.51454e-236	Fibroblast	Rspo1
2.22855e-236	1.51672	0.762	0.734	4.4571e-233	Fibroblast	Col6a3
9.84192e-233	3.10781	0.553	0.516	1.96838e-229	Fibroblast	Armh1
1.49964e-227	4.50639	0.54	0.577	2.99927e-224	Fibroblast	Gria4
1.21361e-226	1.73941	0.634	0.574	2.42722e-223	Fibroblast	Gbp2
4.23655e-224	2.5706	0.579	0.531	8.4731e-221	Fibroblast	Fyn
4.17493e-223	2.96157	0.481	0.296	8.34985e-220	Fibroblast	Ahsg
4.66122e-222	3.26266	0.526	0.587	9.32243e-219	Fibroblast	Eda2r
9.10463e-221	4.92148	0.523	0.466	1.82093e-217	Fibroblast	Fbln7
9.03249e-217	3.72748	0.538	0.549	1.8065e-213	Fibroblast	Fst
3.88125e-216	1.66266	0.355	0.34	7.7625e-213	Fibroblast	Gm48727
2.47098e-214	3.98527	0.43	0.246	4.94195e-211	Fibroblast	Meox1
4.60541e-213	2.59484	0.577	0.569	9.21082e-210	Fibroblast	Cxcl1
2.03354e-212	2.21427	0.599	0.492	4.06708e-209	Fibroblast	Stk32b
1.23099e-210	1.60702	0.562	0.562	2.46199e-207	Fibroblast	Fam111a
1.39871e-207	2.87199	0.475	0.42	2.79742e-204	Fibroblast	Gabra1
5.46651e-205	1.60806	0.539	0.544	1.0933e-201	Fibroblast	Trim30a
8.71865e-205	4.51872	0.512	0.468	1.74373e-201	Fibroblast	Il1rapl1
1.38446e-204	1.58677	0.664	0.571	2.76893e-201	Fibroblast	Capg
1.1221e-203	1.59288	0.594	0.486	2.2442e-200	Fibroblast	Usp18
3.08679e-199	1.89072	0.567	0.474	6.17359e-196	Fibroblast	Ezr
8.52022e-196	2.07121	0.515	0.501	1.70404e-192	Fibroblast	Tmem158
5.06808e-193	2.01309	0.669	0.667	1.01362e-189	Fibroblast	Pcdh9
9.30373e-192	2.18916	0.49	0.317	1.86075e-188	Fibroblast	Tex15
4.65264e-186	5.37888	0.454	0.459	9.30529e-183	Fibroblast	Bnc2
3.65068e-185	2.44881	0.284	0.499	7.30137e-182	Fibroblast	Gpr1
5.62418e-185	5.48562	0.456	0.396	1.12484e-181	Fibroblast	Tcf21
1.3988e-181	6.07336	0.436	0.297	2.79761e-178	Fibroblast	Hpca
1.52184e-177	3.0112	0.108	0.262	3.04368e-174	Fibroblast	Clic3
8.48945e-177	4.78882	0.393	0.393	1.69789e-173	Fibroblast	A230057D06Rik
2.20761e-176	2.24048	0.511	0.538	4.41521e-173	Fibroblast	Nlgn1
3.31015e-176	5.92999	0.361	0.086	6.62031e-173	Fibroblast	A230001M10Rik
5.93235e-176	2.9822	0.467	0.478	1.18647e-172	Fibroblast	Ppp2r2b
9.66909e-174	2.17402	0.596	0.526	1.93382e-170	Fibroblast	Art4
1.14411e-173	1.9733	0.488	0.418	2.28823e-170	Fibroblast	Agmo
3.69266e-172	3.61328	0.521	0.429	7.38532e-169	Fibroblast	Ctsk
6.10452e-172	1.53124	0.599	0.54	1.2209e-168	Fibroblast	Iigp1
1.84736e-170	2.42276	0.591	0.586	3.69473e-167	Fibroblast	Prickle1
1.48408e-169	1.62629	0.704	0.699	2.96816e-166	Fibroblast	Lamc3
7.33688e-168	5.26943	0.493	0.551	1.46738e-164	Fibroblast	Aif1l
5.5427e-163	4.2106	0.533	0.519	1.10854e-159	Fibroblast	Pax1
5.63519e-162	5.47442	0.451	0.366	1.12704e-158	Fibroblast	Tnfsf13b
4.32421e-160	1.95557	0.537	0.374	8.64842e-157	Fibroblast	Cntnap4
5.44166e-159	1.77288	0.488	0.38	1.08833e-155	Fibroblast	Gm16685
6.15572e-156	2.98551	0.492	0.445	1.23114e-152	Fibroblast	Ano3
3.11898e-155	4.19296	0.612	0.548	6.23796e-152	Fibroblast	Smpd3
8.96708e-155	4.59161	0.46	0.339	1.79342e-151	Fibroblast	Zfp804b
2.3649e-153	2.00594	0.512	0.571	4.72979e-150	Fibroblast	Pde7b
1.95621e-152	2.64929	0.469	0.335	3.91242e-149	Fibroblast	Grin3a
1.99479e-151	2.38605	0.243	0.425	3.98957e-148	Fibroblast	Gm12796
1.59667e-150	3.02211	0.512	0.443	3.19333e-147	Fibroblast	Pir
1.25753e-149	4.27688	0.484	0.456	2.51507e-146	Fibroblast	Srgap1
7.24948e-148	2.6421	0.56	0.556	1.4499e-144	Fibroblast	Eya4
4.47919e-145	5.47161	0.437	0.421	8.95838e-142	Fibroblast	Lcn8
4.61613e-145	2.19188	0.611	0.559	9.23226e-142	Fibroblast	Zfp385a
8.76339e-145	2.61044	0.551	0.421	1.75268e-141	Fibroblast	Ccn5
3.14798e-144	5.64935	0.425	0.336	6.29595e-141	Fibroblast	Nkain4
1.15903e-143	1.99751	0.603	0.557	2.31806e-140	Fibroblast	Adamtsl3
2.9033e-140	1.86666	0.623	0.566	5.80659e-137	Fibroblast	Scara3
1.72137e-139	2.27654	0.559	0.532	3.44274e-136	Fibroblast	Isg15
1.9809e-138	3.27121	0.419	0.218	3.9618e-135	Fibroblast	Ifi205
3.60306e-138	4.00375	0.489	0.393	7.20612e-135	Fibroblast	Angpt4
3.0465e-137	2.51464	0.532	0.348	6.09301e-134	Fibroblast	Krt79
4.74011e-137	2.52686	0.486	0.457	9.48022e-134	Fibroblast	Prss12
8.52391e-137	2.00934	0.5	0.535	1.70478e-133	Fibroblast	Ptgs1
2.30304e-133	3.23552	0.518	0.536	4.60609e-130	Fibroblast	Tubb2b
1.52638e-131	2.01962	0.57	0.522	3.05275e-128	Fibroblast	Mcc
3.34195e-131	6.19616	0.24	0.415	6.68391e-128	Fibroblast	Islr2
6.12716e-131	3.38402	0.466	0.487	1.22543e-127	Fibroblast	Fam155a
9.74543e-131	1.8941	0.299	0.46	1.94909e-127	Fibroblast	Sox2ot
9.3793e-130	2.4431	0.45	0.408	1.87586e-126	Fibroblast	Prtg
2.772e-127	1.90853	0.56	0.501	5.54401e-124	Fibroblast	Tsc22d3
6.63252e-126	2.02895	0.525	0.309	1.3265e-122	Fibroblast	Rfx4
5.88496e-125	3.88184	0.508	0.547	1.17699e-121	Fibroblast	Nav3
7.96779e-124	2.99705	0.418	0.48	1.59356e-120	Fibroblast	Grik2
9.10705e-124	5.16069	0.489	0.518	1.82141e-120	Fibroblast	Sntg1
4.64025e-123	2.53089	0.509	0.475	9.28049e-120	Fibroblast	Slc25a21
3.30151e-118	5.5297	0.539	0.599	6.60303e-115	Fibroblast	Pla1a
7.91689e-118	2.87647	0.521	0.528	1.58338e-114	Fibroblast	Cox6b2
2.02779e-117	2.17801	0.565	0.524	4.05557e-114	Fibroblast	Slc4a4
5.65674e-117	1.77886	0.584	0.638	1.13135e-113	Fibroblast	Cpne8
5.38886e-116	2.13846	0.518	0.373	1.07777e-112	Fibroblast	1700013F07Rik
2.22192e-112	2.14502	0.582	0.568	4.44385e-109	Fibroblast	Grm3
7.09773e-112	2.41567	0.484	0.505	1.41955e-108	Fibroblast	Nt5dc2
2.54849e-110	1.5396	0.512	0.494	5.09698e-107	Fibroblast	Psmb8
9.89456e-110	1.73494	0.481	0.425	1.97891e-106	Fibroblast	Cmah
9.75362e-109	2.26207	0.496	0.473	1.95072e-105	Fibroblast	Stc1
1.64085e-108	4.11823	0.318	0.291	3.2817e-105	Fibroblast	Tac1
6.43109e-107	2.00566	0.505	0.37	1.28622e-103	Fibroblast	Plxdc1
5.42991e-106	4.16681	0.463	0.465	1.08598e-102	Fibroblast	Ildr2
2.09532e-105	3.73775	0.454	0.504	4.19063e-102	Fibroblast	Slc4a10
3.31521e-105	1.64449	0.469	0.506	6.63041e-102	Fibroblast	Clec14a
1.61805e-104	2.62137	0.547	0.526	3.23611e-101	Fibroblast	Ptch1
6.96369e-103	6.73268	0.428	0.562	1.39274e-99	Fibroblast	Smim41
9.51438e-100	2.97099	0.46	0.462	1.90288e-96	Fibroblast	Tmem178b
9.45084e-98	3.36018	0.497	0.499	1.89017e-94	Fibroblast	Nsg1
1.34994e-96	3.63887	0.479	0.214	2.69988e-93	Fibroblast	Gm47889
2.12595e-96	1.75513	0.566	0.541	4.2519e-93	Fibroblast	Sgip1
4.34094e-95	2.8391	0.49	0.438	8.68187e-92	Fibroblast	Gm17167
3.34316e-94	1.9103	0.589	0.553	6.68632e-91	Fibroblast	Adm
5.24105e-94	1.56317	0.601	0.553	1.04821e-90	Fibroblast	Kcnq1ot1
1.47345e-93	6.09431	0.346	0.349	2.9469e-90	Fibroblast	Hmcn2
3.78397e-93	4.869	0.422	0.417	7.56793e-90	Fibroblast	Gabrb1
1.04299e-90	2.23396	0.478	0.379	2.08599e-87	Fibroblast	Slc39a8
2.25385e-88	1.69739	0.669	0.632	4.5077e-85	Fibroblast	Peg3
1.08227e-87	1.76611	0.403	0.24	2.16455e-84	Fibroblast	Zfp536
1.47079e-87	2.33839	0.5	0.473	2.94159e-84	Fibroblast	Npas3
1.87385e-87	5.70055	0.379	0.419	3.74771e-84	Fibroblast	Fam180a
1.91149e-87	2.06489	0.491	0.428	3.82298e-84	Fibroblast	Ifit3b
1.98814e-87	2.41248	0.484	0.464	3.97628e-84	Fibroblast	Cst6
2.20931e-87	1.66612	0.529	0.603	4.41862e-84	Fibroblast	Gria3
4.91795e-87	1.61187	0.149	0.303	9.83589e-84	Fibroblast	Upk3b
2.55208e-86	2.11131	0.444	0.359	5.10416e-83	Fibroblast	Grm1
1.63912e-80	2.42614	0.219	0.279	3.27824e-77	Fibroblast	Lgals7
1.74102e-80	7.82508	0.354	0.189	3.48203e-77	Fibroblast	Ren1
2.27121e-79	2.9693	0.453	0.465	4.54242e-76	Fibroblast	Tbx3os1
1.86131e-77	3.67334	0.468	0.485	3.72262e-74	Fibroblast	Cybrd1
1.42688e-74	2.49929	0.476	0.435	2.85375e-71	Fibroblast	Thsd7b
2.88945e-71	2.87612	0.305	0.335	5.7789e-68	Fibroblast	S100g
1.28654e-70	3.07243	0.443	0.326	2.57309e-67	Fibroblast	Ptx3
2.00214e-70	8.18451	0.344	0.301	4.00428e-67	Fibroblast	Dlk1
1.81709e-69	1.92547	0.58	0.62	3.63418e-66	Fibroblast	C1qtnf7
3.89904e-69	1.79513	0.417	0.367	7.79807e-66	Fibroblast	Gata5
6.14872e-67	5.9553	0.352	0.465	1.22974e-63	Fibroblast	Lypd1
3.8271e-64	3.30743	0.491	0.54	7.65421e-61	Fibroblast	Bok
2.51198e-63	1.83721	0.592	0.634	5.02397e-60	Fibroblast	Plce1
1.33736e-62	4.05129	0.443	0.529	2.67472e-59	Fibroblast	Dner
1.637e-62	2.31782	0.391	0.462	3.274e-59	Fibroblast	Gm4841
1.5687e-61	1.53382	0.277	0.08	3.1374e-58	Fibroblast	2600014E21Rik
2.5542e-60	2.38024	0.485	0.512	5.10841e-57	Fibroblast	Tnfaip6
7.72112e-59	3.57106	0.411	0.338	1.54422e-55	Fibroblast	Tnmd
2.81544e-56	1.57551	0.529	0.507	5.63089e-53	Fibroblast	1200007C13Rik
2.12177e-53	2.16029	0.204	0.46	4.24355e-50	Fibroblast	Clstn2
4.17376e-48	2.14434	0.259	0.167	8.34752e-45	Fibroblast	Trim9
5.71395e-48	1.79103	0.551	0.572	1.14279e-44	Fibroblast	Col4a3
7.64327e-48	3.26502	0.407	0.406	1.52865e-44	Fibroblast	Nova1
1.30997e-45	2.75344	0.688	0.735	2.61994e-42	Fibroblast	Sfrp2
1.37556e-42	6.43728	0.134	0.333	2.75113e-39	Fibroblast	Duoxa1
1.28013e-39	1.69164	0.541	0.583	2.56026e-36	Fibroblast	Omd
5.03346e-39	3.55447	0.452	0.478	1.00669e-35	Fibroblast	Fap
5.16376e-39	1.86519	0.421	0.425	1.03275e-35	Fibroblast	L1td1
2.39629e-38	2.11252	0.352	0.483	4.79257e-35	Fibroblast	Catsperd
1.89728e-36	2.32129	0.378	0.489	3.79456e-33	Fibroblast	Elavl2
1.91171e-36	3.07166	0.379	0.256	3.82342e-33	Fibroblast	A230005M16Rik
1.02143e-35	3.14628	0.445	0.545	2.04285e-32	Fibroblast	Fetub
1.04055e-35	3.54998	0.396	0.494	2.08111e-32	Fibroblast	Kcnb2
3.17554e-35	4.27051	0.4	0.484	6.35109e-32	Fibroblast	Aldh1a2
2.12055e-34	1.55087	0.489	0.469	4.2411e-31	Fibroblast	Fign
4.32763e-33	3.07615	0.355	0.508	8.65526e-30	Fibroblast	Cthrc1
6.23626e-33	1.76569	0.464	0.466	1.24725e-29	Fibroblast	Nxph1
7.28624e-33	2.16567	0.499	0.548	1.45725e-29	Fibroblast	Rian
9.04174e-32	3.71345	0.409	0.372	1.80835e-28	Fibroblast	Robo2
1.59802e-31	3.54473	0.463	0.504	3.19604e-28	Fibroblast	Colec11
4.10622e-31	1.78545	0.492	0.379	8.21244e-28	Fibroblast	Gm26737
1.93315e-30	1.67344	0.443	0.336	3.86631e-27	Fibroblast	Cyp26b1
6.953e-29	2.16026	0.509	0.398	1.3906e-25	Fibroblast	Nrg3
6.94476e-27	3.32069	0.367	0.519	1.38895e-23	Fibroblast	Hmcn1
2.36086e-26	2.93174	0.397	0.284	4.72172e-23	Fibroblast	Rgs20
2.69439e-26	1.65469	0.45	0.398	5.38879e-23	Fibroblast	Coch
2.32988e-24	1.79418	0.511	0.592	4.65977e-21	Fibroblast	Dlg2
2.66901e-24	2.76958	0.4	0.488	5.33803e-21	Fibroblast	Dio3os
2.24826e-23	3.04036	0.293	0.378	4.49653e-20	Fibroblast	Scg3
5.84937e-23	2.01839	0.393	0.474	1.16987e-19	Fibroblast	Lhfpl3
1.23953e-22	3.764	0.413	0.556	2.47905e-19	Fibroblast	Gm15675
2.78363e-22	1.73695	0.551	0.527	5.56726e-19	Fibroblast	Thbs2
1.2744e-21	2.4512	0.47	0.431	2.5488e-18	Fibroblast	Gm11437
1.50174e-21	2.61715	0.46	0.502	3.00347e-18	Fibroblast	Chrdl1
1.52765e-19	1.62945	0.38	0.294	3.0553e-16	Fibroblast	Ces1g
4.93284e-18	6.72562	0.283	0.131	9.86568e-15	Fibroblast	Cadm3
4.16362e-17	2.90308	0.485	0.534	8.32724e-14	Fibroblast	Comp
9.05743e-16	2.27168	0.461	0.347	1.81149e-12	Fibroblast	Hydin
5.45233e-15	2.02575	0.398	0.42	1.09047e-11	Fibroblast	Hs3st1
6.3633e-15	2.037	0.34	0.546	1.27266e-11	Fibroblast	Slitrk6
9.39611e-15	3.62233	0.455	0.519	1.87922e-11	Fibroblast	Lvrn
1.31776e-14	4.35449	0.287	0.339	2.63551e-11	Fibroblast	Aldh1a3
3.9483e-14	3.07808	0.443	0.461	7.8966e-11	Fibroblast	Htra4
2.46271e-13	2.25854	0.452	0.433	4.92542e-10	Fibroblast	Mbd1
3.08481e-11	2.81234	0.385	0.363	6.16963e-08	Fibroblast	Eya2
5.07033e-11	4.3328	0.465	0.543	1.01407e-07	Fibroblast	Fgf9
4.70099e-10	1.62999	0.449	0.52	9.40199e-07	Fibroblast	Gsta4
1.67443e-08	1.7721	0.408	0.546	3.34886e-05	Fibroblast	Gm42397
5.53198e-08	2.2751	0.262	0.47	0.00011064	Fibroblast	Gm41333
5.92181e-07	1.6433	0.464	0.555	0.00118436	Fibroblast	Nhsl1
8.50727e-07	1.85869	0.472	0.518	0.00170145	Fibroblast	Tenm4
1.12588e-06	1.5904	0.5	0.54	0.00225177	Fibroblast	Dbn1
3.40217e-06	2.70558	0.306	0.379	0.00680434	Fibroblast	Gm20743
2.44875e-05	1.8148	0.456	0.471	0.048975	Fibroblast	Rasef
5.15498e-05	1.69695	0.334	0.278	0.1031	Fibroblast	Aqp2
7.61037e-05	1.88981	0.531	0.598	0.152207	Fibroblast	Chrm2
0.000177289	2.46707	0.302	0.059	0.354578	Fibroblast	Rtl4
0.000274155	2.7718	0.335	0.456	0.54831	Fibroblast	Gm46323
0.000488387	1.90699	0.527	0.595	0.976774	Fibroblast	Phex
0.000569774	6.50639	0.305	0.325	1	Fibroblast	Dpp4
0.0014256	1.59135	0.449	0.495	1	Fibroblast	Gm12381
0.00176786	3.40484	0.299	0.258	1	Fibroblast	Plin1
0.00203956	1.76223	0.478	0.38	1	Fibroblast	Gm48746
0.00205409	2.04492	0.385	0.502	1	Fibroblast	Pthlh
0.00247692	2.02349	0.448	0.51	1	Fibroblast	Ncam2
0.00383795	2.03376	0.438	0.585	1	Fibroblast	Lrrtm4
0.00819625	2.8776	0.393	0.431	1	Fibroblast	Grm7
0	12.1949	0.725	0.04	0	Leukocytes	Nxpe5
0	11.7472	0.836	0.154	0	Leukocytes	Clec4a2
0	14.3235	0.798	0.152	0	Leukocytes	Clec4a3
0	12.4727	0.918	0.273	0	Leukocytes	Cd86
0	11.5628	0.841	0.21	0	Leukocytes	Gm26740
0	10.1688	0.631	0.004	0	Leukocytes	Sh2d1b1
0	11.654	0.924	0.309	0	Leukocytes	Ptprc
0	11.0113	0.862	0.261	0	Leukocytes	Cd53
0	8.3304	0.613	0.015	0	Leukocytes	Mmp13
0	11.5144	0.863	0.269	0	Leukocytes	Fcrls
0	10.2408	0.657	0.065	0	Leukocytes	Il1a
0	12.7446	0.585	0.001	0	Leukocytes	Gm35154
0	13.0991	0.675	0.095	0	Leukocytes	Nfam1
0	11.7068	0.582	0.006	0	Leukocytes	Cd69
0	10.9748	0.856	0.287	0	Leukocytes	Pld4
0	10.7802	0.805	0.248	0	Leukocytes	Cd300c2
0	12.0968	0.757	0.202	0	Leukocytes	Fcgr1
0	9.39196	0.591	0.04	0	Leukocytes	Clec4d
0	11.7593	0.549	0	0	Leukocytes	Ms4a8a
0	5.63591	0.665	0.118	0	Leukocytes	Gm15987
0	11.221	0.579	0.032	0	Leukocytes	Cd209a
0	9.33128	0.582	0.035	0	Leukocytes	Cd4
0	9.08771	0.809	0.266	0	Leukocytes	Nrros
0	11.2851	0.815	0.272	0	Leukocytes	Itgam
0	9.95245	0.749	0.209	0	Leukocytes	Gm34084
0	10.1377	0.643	0.103	0	Leukocytes	Lcp2
0	10.4483	0.693	0.158	0	Leukocytes	Cd48
0	12.3853	0.532	0	0	Leukocytes	Cd79b
0	10.5134	0.876	0.345	0	Leukocytes	C5ar1
0	12.1619	0.624	0.095	0	Leukocytes	Gm30198
0	11.5459	0.698	0.172	0	Leukocytes	Clec4n
0	7.98973	0.612	0.089	0	Leukocytes	Il7r
0	7.61185	0.916	0.394	0	Leukocytes	Alox5ap
0	9.92336	0.765	0.244	0	Leukocytes	Nckap1l
0	10.8611	0.729	0.21	0	Leukocytes	Hck
0	11.362	0.899	0.381	0	Leukocytes	Dock2
0	7.71177	0.978	0.461	0	Leukocytes	Ucp2
0	8.11183	0.54	0.024	0	Leukocytes	Skint3
0	11.8254	0.579	0.063	0	Leukocytes	Rgs18
0	9.28121	0.558	0.042	0	Leukocytes	Grap2
0	10.7412	0.915	0.403	0	Leukocytes	Aif1
0	11.9213	0.686	0.175	0	Leukocytes	Cd300a
0	9.64537	0.857	0.346	0	Leukocytes	Slc15a3
0	8.0445	0.705	0.2	0	Leukocytes	Hpgd
0	6.3062	0.941	0.44	0	Leukocytes	Unc93b1
0	10.5095	0.798	0.299	0	Leukocytes	Ms4a6d
0	7.53721	0.552	0.053	0	Leukocytes	Cd300lg
0	8.93898	0.75	0.252	0	Leukocytes	Pla2g7
0	6.34796	0.672	0.176	0	Leukocytes	Bst1
0	10.8979	0.892	0.397	0	Leukocytes	Ms4a7
0	7.66256	0.515	0.02	0	Leukocytes	Pimreg
0	10.7279	0.501	0.007	0	Leukocytes	Adgre4
0	9.56835	0.493	0	0	Leukocytes	Oas3
0	10.2451	0.913	0.424	0	Leukocytes	Fcgr2b
0	9.25293	0.512	0.025	0	Leukocytes	Hepacam2
0	10.8877	0.969	0.484	0	Leukocytes	Laptm5
0	12.054	0.502	0.018	0	Leukocytes	Bcl2a1a
0	9.36987	0.479	0	0	Leukocytes	Tm4sf5
0	10.4631	0.926	0.448	0	Leukocytes	Csf1r
0	10.8039	0.833	0.357	0	Leukocytes	C3ar1
0	12.2871	0.492	0.018	0	Leukocytes	Tmem273
0	10.6939	0.885	0.413	0	Leukocytes	Fcgr3
0	11.035	0.949	0.479	0	Leukocytes	C1qc
0	11.7718	0.722	0.252	0	Leukocytes	Ccl4
0	6.34999	0.855	0.385	0	Leukocytes	H2-DMb1
0	12.0326	0.504	0.034	0	Leukocytes	Ms4a4a
0	11.9751	0.47	0	0	Leukocytes	Ifi208
0	10.7406	0.808	0.339	0	Leukocytes	Ms4a6b
0	11.7885	0.785	0.317	0	Leukocytes	Gm20513
0	10.9813	0.942	0.478	0	Leukocytes	Wfdc17
0	9.02144	0.555	0.093	0	Leukocytes	Trim30c
0	11.4276	0.911	0.45	0	Leukocytes	Mir142hg
0	10.3293	0.784	0.324	0	Leukocytes	Arhgap30
0	10.9712	0.707	0.247	0	Leukocytes	Cysltr1
0	7.96577	0.898	0.443	0	Leukocytes	Slc9a9
0	10.0759	0.771	0.317	0	Leukocytes	Pou2f2
0	7.60787	0.918	0.465	0	Leukocytes	Fyb
0	8.39333	0.689	0.237	0	Leukocytes	Ctla2b
0	11.108	0.505	0.055	0	Leukocytes	Gm21188
0	6.08881	0.836	0.391	0	Leukocytes	Basp1
0	10.7502	0.762	0.319	0	Leukocytes	Gpr65
0	10.596	0.983	0.54	0	Leukocytes	Lyz2
0	10.4581	0.994	0.551	0	Leukocytes	Fcer1g
0	11.5831	0.962	0.519	0	Leukocytes	Lcp1
0	10.3471	0.88	0.438	0	Leukocytes	Mgl2
0	9.14955	0.461	0.02	0	Leukocytes	Il1rl1
0	5.86767	0.959	0.522	0	Leukocytes	Ctsc
0	11.8316	0.703	0.271	0	Leukocytes	Ptpro
0	8.13885	0.854	0.423	0	Leukocytes	Prkcb
0	10.8346	0.75	0.321	0	Leukocytes	Epsti1
0	11.0739	0.432	0.006	0	Leukocytes	BE692007
0	10.8001	0.783	0.358	0	Leukocytes	Clec4a1
0	10.662	0.874	0.45	0	Leukocytes	Adgre1
0	1.61722	0.444	0.023	0	Leukocytes	Gimap1
0	8.71862	0.954	0.535	0	Leukocytes	Ptpn18
0	10.8679	0.891	0.473	0	Leukocytes	Ms4a6c
0	5.24927	0.783	0.365	0	Leukocytes	Ifi203
0	6.22211	0.539	0.121	0	Leukocytes	Neil3
0	7.79174	0.903	0.486	0	Leukocytes	Plek
0	6.95109	0.898	0.481	0	Leukocytes	Lyn
0	10.2373	0.863	0.448	0	Leukocytes	Pf4
0	11.6489	0.672	0.259	0	Leukocytes	Ncf4
0	8.96966	0.899	0.488	0	Leukocytes	Arhgap15
0	7.43739	0.808	0.399	0	Leukocytes	Syk
0	5.43015	0.879	0.471	0	Leukocytes	Rgs10
0	9.92479	0.791	0.383	0	Leukocytes	Cyth4
0	8.85504	0.847	0.441	0	Leukocytes	Gmfg
0	7.48628	0.707	0.302	0	Leukocytes	Cd38
0	10.1622	0.992	0.588	0	Leukocytes	Tyrobp
0	8.30927	0.805	0.402	0	Leukocytes	Cd14
0	6.63428	0.851	0.45	0	Leukocytes	Ifi207
0	9.97056	0.7	0.3	0	Leukocytes	Il1rn
0	8.3442	0.741	0.344	0	Leukocytes	Slfn2
0	11.1236	0.649	0.254	0	Leukocytes	St8sia4
0	10.6606	0.961	0.572	0	Leukocytes	C1qb
0	11.0684	0.956	0.569	0	Leukocytes	C1qa
0	10.5005	0.778	0.392	0	Leukocytes	Mpeg1
0	4.82904	0.902	0.518	0	Leukocytes	Srgn
0	11.2447	0.656	0.272	0	Leukocytes	Ildr1
0	8.00309	0.671	0.288	0	Leukocytes	Stat4
0	8.64472	0.492	0.11	0	Leukocytes	Itgal
0	11.39	0.889	0.514	0	Leukocytes	Cybb
0	3.5024	0.912	0.538	0	Leukocytes	Lgmn
0	5.37389	0.832	0.458	0	Leukocytes	Vsir
0	10.6761	0.979	0.606	0	Leukocytes	Ctss
0	8.32923	0.721	0.353	0	Leukocytes	Ciita
0	11.9928	0.787	0.424	0	Leukocytes	Cd300ld
0	6.87271	0.616	0.254	0	Leukocytes	Cd2
0	6.68156	0.844	0.482	0	Leukocytes	Hcls1
0	4.65829	0.93	0.569	0	Leukocytes	Ifi27l2a
0	5.43975	0.91	0.549	0	Leukocytes	Dab2
0	3.86161	0.749	0.388	0	Leukocytes	H2-Q7
0	6.01403	0.723	0.363	0	Leukocytes	Plcl2
0	10.8756	0.86	0.501	0	Leukocytes	Mrc1
0	10.9582	0.816	0.457	0	Leukocytes	Ly86
0	9.89662	0.724	0.366	0	Leukocytes	March1
0	9.48033	0.798	0.442	0	Leukocytes	Pirb
0	11.2741	0.745	0.389	0	Leukocytes	Ptafr
0	7.11782	0.912	0.559	0	Leukocytes	Lst1
0	4.77726	0.914	0.564	0	Leukocytes	Arhgdib
0	6.90462	0.761	0.413	0	Leukocytes	Iqgap2
0	10.6972	0.684	0.336	0	Leukocytes	Msr1
0	6.09036	0.898	0.551	0	Leukocytes	Cotl1
0	5.31002	0.784	0.44	0	Leukocytes	Csf2ra
0	9.19445	0.857	0.513	0	Leukocytes	Coro1a
0	11.9547	0.709	0.365	0	Leukocytes	Slamf7
0	10.1143	0.535	0.193	0	Leukocytes	Ifi206
0	4.49674	0.791	0.45	0	Leukocytes	Ccnd1
0	8.69248	0.884	0.543	0	Leukocytes	Mctp1
0	11.6034	0.728	0.388	0	Leukocytes	Il1b
0	10.4956	0.87	0.531	0	Leukocytes	Spi1
0	4.05891	0.831	0.492	0	Leukocytes	Cxcl16
0	10.112	0.39	0.053	0	Leukocytes	Runx3
0	6.42075	0.871	0.535	0	Leukocytes	H2-DMa
0	5.35453	0.433	0.098	0	Leukocytes	Igf1os
0	4.33778	0.917	0.583	0	Leukocytes	Ly6e
0	7.01421	0.789	0.455	0	Leukocytes	Cfp
0	6.8766	0.931	0.598	0	Leukocytes	Trf
0	5.16727	0.878	0.547	0	Leukocytes	Runx1
0	6.759	0.769	0.439	0	Leukocytes	Ncf2
0	3.78614	0.815	0.487	0	Leukocytes	Psmb8
0	2.69203	0.93	0.603	0	Leukocytes	Marcks
0	3.36251	0.906	0.582	0	Leukocytes	Camk1d
0	10.3111	0.92	0.598	0	Leukocytes	Cd52
0	7.51913	0.78	0.46	0	Leukocytes	Aoah
0	4.36806	0.878	0.558	0	Leukocytes	Kctd12
0	10.8383	0.725	0.407	0	Leukocytes	Ikzf1
0	5.14761	0.856	0.539	0	Leukocytes	Marcksl1
0	7.9726	0.75	0.435	0	Leukocytes	Ccl8
0	3.6051	0.836	0.521	0	Leukocytes	Ifi30
0	6.90468	0.585	0.27	0	Leukocytes	Aurkb
0	10.4911	0.804	0.491	0	Leukocytes	Itgb2
0	11.2131	0.645	0.332	0	Leukocytes	Clec4b1
0	8.35956	0.714	0.401	0	Leukocytes	Inpp5d
0	4.54095	0.817	0.504	0	Leukocytes	Sirpa
0	9.67132	0.747	0.437	0	Leukocytes	Ccr2
0	3.48724	0.878	0.573	0	Leukocytes	Snx5
0	9.66849	0.694	0.39	0	Leukocytes	Scimp
0	10.7877	0.822	0.52	0	Leukocytes	Lilrb4a
0	11.1967	0.736	0.435	0	Leukocytes	Blnk
0	9.66052	0.752	0.452	0	Leukocytes	Plbd1
0	10.3757	0.736	0.437	0	Leukocytes	Lair1
0	10.8406	0.782	0.484	0	Leukocytes	Bank1
0	3.93626	0.809	0.511	0	Leukocytes	Tm6sf1
0	8.65077	0.787	0.491	0	Leukocytes	Hpgds
0	10.4393	0.766	0.471	0	Leukocytes	Folr2
0	3.61356	0.884	0.592	0	Leukocytes	Rab8b
0	8.75484	0.84	0.548	0	Leukocytes	F13a1
0	9.24927	0.851	0.559	0	Leukocytes	Cd83
0	5.92836	0.759	0.469	0	Leukocytes	Gng2
0	4.62058	0.81	0.523	0	Leukocytes	Lrmda
0	10.4417	0.661	0.375	0	Leukocytes	Ptpn6
0	10.5864	0.509	0.226	0	Leukocytes	Igsf6
0	9.14155	0.714	0.435	0	Leukocytes	Selplg
0	9.59831	0.914	0.636	0	Leukocytes	H2-Ab1
0	3.60255	0.941	0.666	0	Leukocytes	Tmem176b
0	7.09229	0.756	0.482	0	Leukocytes	Ccl7
0	7.18097	0.723	0.449	0	Leukocytes	Lat2
0	11.2091	0.7	0.426	0	Leukocytes	Lilra5
0	4.27792	0.795	0.522	0	Leukocytes	Immp2l
0	9.91928	0.741	0.468	0	Leukocytes	Ccr5
0	10.7791	0.725	0.453	0	Leukocytes	Rbm47
0	9.77504	0.813	0.541	0	Leukocytes	Rac2
0	3.71147	0.835	0.564	0	Leukocytes	Plin2
0	8.51628	0.816	0.547	0	Leukocytes	Ccl9
0	4.09281	0.813	0.545	0	Leukocytes	Mafb
0	9.41376	0.858	0.591	0	Leukocytes	Ccl6
0	10.0828	0.829	0.562	0	Leukocytes	Bcl2a1b
0	5.68549	0.803	0.537	0	Leukocytes	Stab1
0	9.82617	0.672	0.408	0	Leukocytes	Pilra
0	3.66014	0.792	0.528	0	Leukocytes	Vav3
0	3.72091	0.952	0.69	0	Leukocytes	Pid1
0	4.47262	0.815	0.553	0	Leukocytes	Rreb1
0	9.89276	0.722	0.461	0	Leukocytes	Nlrp3
0	10.9301	0.26	0	0	Leukocytes	Asgr2
0	8.86124	0.724	0.464	0	Leukocytes	Neurl3
0	3.06715	0.814	0.555	0	Leukocytes	Man1a
0	3.92458	0.918	0.66	0	Leukocytes	Tmem176a
0	9.16553	0.697	0.439	0	Leukocytes	Fcgr4
0	3.49529	0.936	0.682	0	Leukocytes	Neat1
0	10.1797	0.94	0.686	0	Leukocytes	Cd74
0	9.86218	0.74	0.488	0	Leukocytes	Pik3ap1
0	3.08663	0.838	0.586	0	Leukocytes	Man2b1
0	4.03785	0.787	0.536	0	Leukocytes	Rgl1
0	8.15419	0.776	0.53	0	Leukocytes	Fermt3
0	5.07244	0.777	0.532	0	Leukocytes	Rassf4
0	4.5145	0.854	0.612	0	Leukocytes	Maf
0	2.12284	0.863	0.621	0	Leukocytes	Tgfbi
0	3.69865	0.956	0.714	0	Leukocytes	Zeb2
0	8.12539	0.833	0.594	0	Leukocytes	Cxcl2
0	3.00214	0.919	0.68	0	Leukocytes	Trps1
0	2.85438	0.893	0.655	0	Leukocytes	Pltp
0	2.76592	0.844	0.606	0	Leukocytes	Cdk14
0	9.63444	0.905	0.67	0	Leukocytes	H2-Eb1
0	2.58869	0.896	0.661	0	Leukocytes	Fxyd5
0	3.84667	0.841	0.606	0	Leukocytes	Frmd4b
0	2.73095	0.894	0.665	0	Leukocytes	Ptprj
0	2.35117	0.866	0.637	0	Leukocytes	Jpt1
0	8.11976	0.729	0.507	0	Leukocytes	Lyve1
0	5.62168	0.866	0.644	0	Leukocytes	Cd68
0	4.99459	0.77	0.549	0	Leukocytes	Arhgap18
0	3.20308	0.835	0.616	0	Leukocytes	Tmcc1
0	2.71821	0.842	0.623	0	Leukocytes	Ninj1
0	10.0492	0.904	0.686	0	Leukocytes	H2-Aa
0	5.52166	0.794	0.578	0	Leukocytes	Cx3cr1
0	2.44595	0.881	0.667	0	Leukocytes	Ppp3ca
0	7.22288	0.732	0.521	0	Leukocytes	Tbxas1
0	2.16691	0.964	0.753	0	Leukocytes	Ctsh
0	8.40902	0.633	0.423	0	Leukocytes	Dnase1l3
0	11.1937	0.561	0.356	0	Leukocytes	Ifi213
0	6.0479	0.771	0.571	0	Leukocytes	Myo1f
0	9.87871	0.584	0.386	0	Leukocytes	Bin2
0	3.9744	0.956	0.76	0	Leukocytes	Rbpj
0	3.0427	0.976	0.79	0	Leukocytes	Sh3bgrl3
0	2.56966	0.983	0.804	0	Leukocytes	H2-D1
0	2.41765	0.99	0.841	0	Leukocytes	H2-K1
0	4.12834	0.952	0.819	0	Leukocytes	Apoe
0	2.15727	0.898	0.767	0	Leukocytes	Ehd4
0	1.68466	0.928	0.834	0	Leukocytes	H2afz
0	2.73576	0.946	0.885	0	Leukocytes	Selenop
0	2.53412	0.973	0.942	0	Leukocytes	Ctsb
0	2.80157	0.997	0.974	0	Leukocytes	Ftl1
8.90219e-308	8.18135	0.623	0.352	1.78044e-304	Leukocytes	Gatm
9.61407e-306	3.46936	0.78	0.511	1.92281e-302	Leukocytes	Cmip
3.9385e-304	2.93026	0.814	0.608	7.87701e-301	Leukocytes	Abca1
1.20991e-303	5.08329	0.749	0.513	2.41982e-300	Leukocytes	Arrb2
2.08976e-303	9.05997	0.68	0.566	4.17952e-300	Leukocytes	Cd33
2.67134e-303	4.78584	0.727	0.407	5.34268e-300	Leukocytes	Mndal
3.03307e-303	8.79914	0.681	0.325	6.06615e-300	Leukocytes	Cd37
6.15461e-303	9.44018	0.7	0.449	1.23092e-299	Leukocytes	Trem2
4.4615e-302	5.64995	0.749	0.459	8.92299e-299	Leukocytes	Dclre1c
8.75353e-301	9.96566	0.617	0.361	1.75071e-297	Leukocytes	Bcl2a1d
3.17936e-300	9.73375	0.689	0.452	6.35873e-297	Leukocytes	Adap2
2.84702e-299	10.129	0.669	0.328	5.69404e-296	Leukocytes	Vav1
6.77077e-299	9.13183	0.673	0.119	1.35415e-295	Leukocytes	Klra2
1.98011e-298	4.07936	0.567	0.259	3.96022e-295	Leukocytes	Hp
1.28664e-296	4.90673	0.752	0.498	2.57328e-293	Leukocytes	P2ry6
1.7596e-296	10.089	0.657	0.475	3.5192e-293	Leukocytes	Clec12a
5.27838e-296	4.18924	0.513	0.151	1.05568e-292	Leukocytes	Cxcl14
5.34847e-292	11.2432	0.669	0.238	1.06969e-288	Leukocytes	Lilr4b
1.18238e-290	10.263	0.696	0.444	2.36477e-287	Leukocytes	Cd163
5.74569e-290	6.18017	0.507	0.298	1.14914e-286	Leukocytes	Ryr1
3.55646e-289	8.39012	0.708	0.474	7.11292e-286	Leukocytes	Cd72
3.1603e-288	5.79323	0.702	0.331	6.3206e-285	Leukocytes	Ifi204
1.69418e-286	2.87196	0.813	0.652	3.38835e-283	Leukocytes	Ssh2
4.80978e-286	9.79058	0.616	0.079	9.61956e-283	Leukocytes	Gm46224
1.62463e-285	10.5844	0.639	0.163	3.24925e-282	Leukocytes	Clec10a
2.8166e-282	7.03481	0.696	0.375	5.63321e-279	Leukocytes	Smagp
3.97447e-282	10.0006	0.666	0.378	7.94894e-279	Leukocytes	Ncf1
9.50593e-282	3.46353	0.733	0.603	1.90119e-278	Leukocytes	AW112010
1.19918e-280	5.05223	0.742	0.523	2.39835e-277	Leukocytes	Rasgef1b
7.53033e-279	6.94054	0.703	0.432	1.50607e-275	Leukocytes	Inpp4b
1.00402e-278	2.89433	0.804	0.66	2.00804e-275	Leukocytes	Psd3
5.15011e-277	7.68124	0.651	0.442	1.03002e-273	Leukocytes	Atp8b4
2.07613e-275	4.47919	0.754	0.558	4.15226e-272	Leukocytes	B930036N10Rik
1.70596e-274	10.2307	0.687	0.404	3.41191e-271	Leukocytes	Ccl12
2.81945e-274	9.85303	0.641	0.192	5.63889e-271	Leukocytes	Rgs1
3.73078e-270	8.64893	0.685	0.314	7.46155e-267	Leukocytes	Ltc4s
3.06794e-268	8.65623	0.68	0.306	6.13588e-265	Leukocytes	Wdfy4
9.22208e-265	4.69201	0.735	0.509	1.84442e-261	Leukocytes	Tmem106a
3.12671e-264	6.07625	0.7	0.489	6.25342e-261	Leukocytes	Shtn1
3.39903e-264	2.02995	0.54	0.127	6.79807e-261	Leukocytes	Ifi44
3.48389e-264	8.76143	0.605	0.163	6.96777e-261	Leukocytes	Lyz1
3.04273e-262	4.14538	0.747	0.488	6.08547e-259	Leukocytes	Ophn1
7.52916e-262	4.12265	0.738	0.523	1.50583e-258	Leukocytes	C4b
3.99481e-261	3.66864	0.758	0.555	7.98962e-258	Leukocytes	Fli1
1.66886e-260	10.3373	0.586	0.391	3.33773e-257	Leukocytes	Tnfaip8l2
2.84202e-260	2.41012	0.651	0.192	5.68404e-257	Leukocytes	Efcc1
5.36628e-260	4.46549	0.721	0.621	1.07326e-256	Leukocytes	Eps8
4.95755e-259	10.0977	0.603	0.231	9.9151e-256	Leukocytes	Fcna
4.95121e-257	2.84342	0.702	0.479	9.90241e-254	Leukocytes	H2-Q6
8.60245e-255	2.47906	0.143	0.508	1.72049e-251	Leukocytes	Dhrs9
1.10188e-254	2.51857	0.701	0.502	2.20375e-251	Leukocytes	Emilin2
2.50818e-254	9.65771	0.613	0.282	5.01637e-251	Leukocytes	Cd84
6.24688e-253	6.74626	0.696	0.511	1.24938e-249	Leukocytes	Lpxn
1.10679e-252	9.09264	0.426	0.047	2.21358e-249	Leukocytes	Apoc2
2.48604e-252	9.08002	0.657	0.312	4.97208e-249	Leukocytes	Ighm
1.52875e-251	7.70542	0.679	0.313	3.0575e-248	Leukocytes	Lacc1
1.79407e-251	3.14622	0.004	0.416	3.58815e-248	Leukocytes	Fgfbp1
4.90534e-251	5.51302	0.694	0.456	9.81067e-248	Leukocytes	Gpsm3
1.34326e-250	2.35498	0.812	0.636	2.68652e-247	Leukocytes	Elmo1
1.61825e-249	9.82545	0.605	0.263	3.2365e-246	Leukocytes	Gpr132
2.88107e-249	9.78517	0.587	0.273	5.76214e-246	Leukocytes	Cd180
8.28889e-248	7.28697	0.641	0.361	1.65778e-244	Leukocytes	Gpr183
2.3109e-247	7.25262	0.658	0.397	4.6218e-244	Leukocytes	Pik3r5
5.53246e-247	11.4918	0.561	0.347	1.10649e-243	Leukocytes	Ccr1
8.18652e-246	4.22727	0.735	0.446	1.6373e-242	Leukocytes	Slamf9
1.69986e-244	4.05321	0.727	0.531	3.39971e-241	Leukocytes	Myo5a
1.35924e-239	10.4015	0.595	0.33	2.71848e-236	Leukocytes	Alox5
4.57421e-237	8.70636	0.666	0.344	9.14842e-234	Leukocytes	Dok2
1.14972e-236	5.2712	0.702	0.518	2.29944e-233	Leukocytes	Itgb7
4.90923e-235	5.63344	0.709	0.543	9.81845e-232	Leukocytes	E230029C05Rik
1.5471e-234	10.0221	0.605	0.356	3.09421e-231	Leukocytes	Tnf
1.01526e-233	4.21759	0.722	0.435	2.03052e-230	Leukocytes	St3gal6
2.44273e-233	9.28533	0.637	0.583	4.88546e-230	Leukocytes	Evi2a
8.97686e-232	7.09128	0.661	0.396	1.79537e-228	Leukocytes	Ptpre
1.49642e-231	6.34044	0.069	0.525	2.99284e-228	Leukocytes	Hdc
2.83324e-231	1.8191	0.877	0.722	5.66648e-228	Leukocytes	Gab2
2.52664e-230	10.0624	0.099	0.443	5.05328e-227	Leukocytes	S100a8
4.34002e-229	3.14637	0.759	0.596	8.68004e-226	Leukocytes	Sdc3
1.43376e-228	5.64274	0.67	0.566	2.86752e-225	Leukocytes	Cd40
1.23292e-227	2.15511	0.046	0.465	2.46583e-224	Leukocytes	Upp1
4.09795e-227	8.30648	0.647	0.415	8.19591e-224	Leukocytes	AI662270
6.32243e-227	2.57741	0.801	0.642	1.26449e-223	Leukocytes	Rnf150
1.06262e-221	2.32865	0.767	0.599	2.12524e-218	Leukocytes	Rftn1
2.06847e-221	5.82079	0.688	0.582	4.13693e-218	Leukocytes	Traf1
2.67232e-219	8.3039	0.642	0.45	5.34465e-216	Leukocytes	Samsn1
3.92673e-218	10.9603	0.595	0.313	7.85345e-215	Leukocytes	Tlr7
1.55376e-217	10.655	0.539	0.227	3.10751e-214	Leukocytes	Cass4
3.74884e-217	2.84025	0.153	0.388	7.49767e-214	Leukocytes	Pglyrp1
2.11243e-216	2.20842	0.006	0.396	4.22485e-213	Leukocytes	Calcb
2.49374e-216	1.85079	0.82	0.852	4.98748e-213	Leukocytes	Cbr2
3.58302e-216	6.49792	0.658	0.499	7.16605e-213	Leukocytes	Gm10634
3.95517e-216	7.18792	0.655	0.402	7.91033e-213	Leukocytes	Ccl2
1.48298e-215	6.65998	0.306	0.022	2.96595e-212	Leukocytes	Radx
2.53107e-215	9.60559	0.537	0.175	5.06213e-212	Leukocytes	Slc13a3
1.21986e-214	8.91945	0.609	0.501	2.43971e-211	Leukocytes	Rnase6
3.38641e-213	3.48716	0.719	0.505	6.77282e-210	Leukocytes	Sh3kbp1
1.64327e-212	7.44919	0.65	0.415	3.28654e-209	Leukocytes	Cd36
1.7293e-211	10.9387	0.539	0.301	3.4586e-208	Leukocytes	Pla2g2d
3.76213e-209	10.062	0.574	0.243	7.52427e-206	Leukocytes	Itgax
1.73508e-208	4.31103	0.682	0.425	3.47017e-205	Leukocytes	Agmo
3.30512e-208	8.76229	0.526	0.264	6.61024e-205	Leukocytes	Mmp12
4.27989e-208	2.23533	0.827	0.715	8.55978e-205	Leukocytes	Nfkbiz
5.82016e-208	2.44538	0.812	0.662	1.16403e-204	Leukocytes	Hmgb2
2.77263e-207	9.96516	0.537	0.066	5.54526e-204	Leukocytes	Pik3cg
6.54814e-207	2.97682	0.071	0.408	1.30963e-203	Leukocytes	Rpl3l
1.34024e-206	4.29995	0.705	0.532	2.68048e-203	Leukocytes	Pitpnc1
2.43259e-206	6.88072	0.605	0.077	4.86518e-203	Leukocytes	Ipcef1
3.21347e-204	9.09101	0.56	0.262	6.42693e-201	Leukocytes	Timd4
7.08296e-204	1.9653	0.806	0.572	1.41659e-200	Leukocytes	Bst2
2.02247e-203	3.06285	0.724	0.592	4.04494e-200	Leukocytes	Gas7
1.66817e-202	6.66079	0.626	0.296	3.33635e-199	Leukocytes	Pclaf
1.83953e-202	9.36421	0.598	0.398	3.67905e-199	Leukocytes	5033421B08Rik
7.82803e-202	8.7595	0.525	0.333	1.56561e-198	Leukocytes	Gm13822
7.9672e-202	2.4958	0.78	0.607	1.59344e-198	Leukocytes	Sdf2l1
1.36369e-201	3.66465	0.735	0.423	2.72738e-198	Leukocytes	Gngt2
8.75541e-201	4.48169	0.691	0.444	1.75108e-197	Leukocytes	Hmox1
9.7513e-200	2.47439	0.742	0.506	1.95026e-196	Leukocytes	Tsc22d3
1.63926e-199	3.5063	0.589	0.247	3.27853e-196	Leukocytes	Kcnq1
4.54393e-199	12.5446	0.616	0.209	9.08786e-196	Leukocytes	Ccl3
7.19781e-196	4.94563	0.648	0.517	1.43956e-192	Leukocytes	Tnfaip2
4.01891e-195	11.1513	0.58	0.117	8.03782e-192	Leukocytes	Cd209g
5.23815e-195	1.51157	0.919	0.841	1.04763e-191	Leukocytes	Slc8a1
7.60986e-195	1.77225	0.74	0.592	1.52197e-191	Leukocytes	Igf1
7.79495e-195	9.96374	0.551	0.289	1.55899e-191	Leukocytes	Tnip3
3.115e-194	10.0877	0.515	0.165	6.22999e-191	Leukocytes	4930430E12Rik
2.38742e-192	3.52381	0.675	0.466	4.77484e-189	Leukocytes	Gm41609
1.13909e-191	3.2082	0.725	0.5	2.27819e-188	Leukocytes	Zdhhc14
1.18214e-191	3.78243	0.703	0.498	2.36429e-188	Leukocytes	Pde3b
2.50061e-191	10.5132	0.547	0.147	5.00121e-188	Leukocytes	Cd209d
8.66588e-191	9.44033	0.502	0.087	1.73318e-187	Leukocytes	Ms4a4c
1.39245e-189	4.5726	0.68	0.571	2.7849e-186	Leukocytes	4933406I18Rik
4.25172e-189	8.98014	0.507	0.449	8.50345e-186	Leukocytes	H2-Ob
1.91646e-188	9.36097	0.603	0.429	3.83292e-185	Leukocytes	Stap1
3.9593e-188	7.05972	0.622	0.461	7.91859e-185	Leukocytes	Slc2a6
5.01542e-188	1.90176	0.782	0.625	1.00308e-184	Leukocytes	Glul
3.05948e-185	8.5996	0.595	0.548	6.11897e-182	Leukocytes	Il10ra
2.51623e-184	3.45104	0.705	0.513	5.03246e-181	Leukocytes	Trerf1
8.12886e-184	4.3159	0.591	0.457	1.62577e-180	Leukocytes	Ifi211
2.82091e-183	5.66	0.507	0.271	5.64183e-180	Leukocytes	Prr15l
6.70342e-183	6.39926	0.65	0.386	1.34068e-179	Leukocytes	Arhgap22
1.12352e-180	5.88176	0.654	0.454	2.24703e-177	Leukocytes	Ubash3b
1.74182e-180	2.52375	0.742	0.637	3.48364e-177	Leukocytes	Zswim6
2.95187e-180	3.47737	0.649	0.529	5.90375e-177	Leukocytes	Tspan13
9.3702e-180	8.84636	0.59	0.325	1.87404e-176	Leukocytes	Havcr2
1.07595e-177	9.46241	0.543	0.346	2.1519e-174	Leukocytes	Chp2
1.41237e-177	4.66692	0.68	0.494	2.82475e-174	Leukocytes	Apobec1
8.41499e-177	5.09033	0.663	0.51	1.683e-173	Leukocytes	Lrrc8d
1.14816e-176	6.31625	0.526	0.376	2.29632e-173	Leukocytes	Il18r1
5.37598e-176	6.23821	0.593	0.334	1.0752e-172	Leukocytes	1600002D24Rik
7.19998e-176	4.15187	0.683	0.503	1.44e-172	Leukocytes	G530011O06Rik
7.65139e-175	4.46273	0.672	0.499	1.53028e-171	Leukocytes	Gm26885
3.17064e-174	5.28097	0.336	0.099	6.34129e-171	Leukocytes	Slc16a12
1.10726e-173	3.98329	0.669	0.609	2.21453e-170	Leukocytes	Abca9
3.64315e-173	5.59325	0.029	0.448	7.2863e-170	Leukocytes	Plet1
1.18299e-172	7.68637	0.627	0.312	2.36598e-169	Leukocytes	Sema4a
8.04074e-172	8.01091	0.558	0.388	1.60815e-168	Leukocytes	Cytip
3.03017e-171	10.9244	0.597	0.403	6.06034e-168	Leukocytes	Ccl24
2.07374e-169	5.06891	0.512	0.222	4.14748e-166	Leukocytes	Sla
7.25025e-169	6.53306	0.565	0.398	1.45005e-165	Leukocytes	Mki67
1.31992e-168	8.10329	0.554	0.333	2.63983e-165	Leukocytes	Arhgap25
1.17262e-167	3.13214	0.719	0.513	2.34525e-164	Leukocytes	Pbx3
1.27811e-167	2.5153	0.577	0.272	2.55621e-164	Leukocytes	Crym
2.57479e-167	5.64286	0.645	0.582	5.14957e-164	Leukocytes	Irf8
3.33042e-167	1.62736	0.797	0.689	6.66083e-164	Leukocytes	Nrp1
2.80819e-163	5.78113	0.623	0.441	5.61638e-160	Leukocytes	Slco2b1
1.40438e-162	10.9442	0.574	0.383	2.80876e-159	Leukocytes	Cd209f
4.31916e-162	2.54254	0.722	0.554	8.63831e-159	Leukocytes	Lgals3bp
5.95536e-162	9.95992	0.495	0.283	1.19107e-158	Leukocytes	Cd209b
5.28508e-160	6.95773	0.5	0.435	1.05702e-156	Leukocytes	Ifitm6
1.51844e-159	4.09242	0.661	0.559	3.03687e-156	Leukocytes	Fam111a
3.54481e-159	8.84618	0.558	0.345	7.08962e-156	Leukocytes	Siglece
9.91265e-158	2.22843	0.698	0.5	1.98253e-154	Leukocytes	Gda
1.8534e-156	2.70289	0.707	0.628	3.7068e-153	Leukocytes	Srgap2
4.63813e-156	7.27057	0.582	0.099	9.27627e-153	Leukocytes	Gpr68
6.30634e-156	8.73003	0.581	0.272	1.26127e-152	Leukocytes	Tmem37
7.16387e-155	5.62817	0.605	0.463	1.43277e-151	Leukocytes	Zmynd15
1.16157e-154	2.06898	0.629	0.295	2.32315e-151	Leukocytes	Krt7
1.2498e-153	11.5637	0.405	0.168	2.4996e-150	Leukocytes	Vsig4
1.51002e-152	2.70156	0.71	0.512	3.02003e-149	Leukocytes	Casp4
5.58005e-152	8.36937	0.556	0.249	1.11601e-148	Leukocytes	Otulinl
1.86755e-151	4.84138	0.619	0.443	3.73511e-148	Leukocytes	Gm4951
2.35184e-151	9.82524	0.526	0.415	4.70368e-148	Leukocytes	Rhoh
8.77036e-149	3.94488	0.641	0.425	1.75407e-145	Leukocytes	Rab3il1
3.20054e-148	2.62676	0.645	0.421	6.40108e-145	Leukocytes	Slfn5
1.09118e-147	6.34271	0.598	0.372	2.18236e-144	Leukocytes	Arhgap45
2.02595e-147	9.21296	0.546	0.373	4.05189e-144	Leukocytes	Gpr34
4.77801e-147	6.47635	0.612	0.395	9.55602e-144	Leukocytes	Batf
1.82754e-145	3.52195	0.675	0.56	3.65508e-142	Leukocytes	Rad51b
5.47401e-145	5.32094	0.561	0.504	1.0948e-141	Leukocytes	Il2rg
1.03265e-144	4.42316	0.614	0.432	2.0653e-141	Leukocytes	Cmah
4.54714e-142	2.42234	0.715	0.593	9.09429e-139	Leukocytes	Dock4
7.82404e-141	3.75323	0.646	0.555	1.56481e-137	Leukocytes	Pde7b
7.64641e-140	2.3378	0.718	0.506	1.52928e-136	Leukocytes	Naaa
6.88906e-139	5.66021	0.413	0.24	1.37781e-135	Leukocytes	Oasl1
1.9413e-138	6.59054	0.457	0.383	3.8826e-135	Leukocytes	4930469K13Rik
4.47958e-138	1.79269	0.613	0.244	8.95917e-135	Leukocytes	Plac8
1.19545e-137	12.5092	0.424	0.046	2.3909e-134	Leukocytes	Cyp4f18
2.26789e-137	11.1651	0.47	0.151	4.53578e-134	Leukocytes	Napsa
2.88279e-137	4.56864	0.651	0.506	5.76557e-134	Leukocytes	P2rx7
3.95396e-137	7.31929	0.558	0.403	7.90792e-134	Leukocytes	Mmp9
2.68124e-136	2.6121	0.717	0.603	5.36247e-133	Leukocytes	Enox2
1.43889e-135	5.51075	0.155	0.434	2.87779e-132	Leukocytes	Gm36723
1.57778e-135	4.24522	0.622	0.41	3.15556e-132	Leukocytes	Areg
6.72819e-135	6.27331	0.613	0.337	1.34564e-131	Leukocytes	Rab11fip1
7.73138e-135	5.78359	0.589	0.394	1.54628e-131	Leukocytes	Saa3
1.05613e-134	3.30688	0.611	0.288	2.11227e-131	Leukocytes	4933439K11Rik
2.44551e-134	9.69898	0.472	0.095	4.89102e-131	Leukocytes	H2-DMb2
2.44703e-134	3.66335	0.132	0.485	4.89407e-131	Leukocytes	Itgae
4.76442e-134	3.70842	0.638	0.539	9.52885e-131	Leukocytes	Trim30a
9.61501e-133	3.42372	0.608	0.363	1.923e-129	Leukocytes	Fat3
2.07766e-131	1.734	0.639	0.393	4.15532e-128	Leukocytes	Clstn2
2.69112e-129	4.94515	0.584	0.28	5.38225e-126	Leukocytes	Rtn1
2.47949e-128	5.49666	0.612	0.432	4.95899e-125	Leukocytes	Irf5
5.66246e-128	2.43954	0.588	0.381	1.13249e-124	Leukocytes	Grm8
1.06863e-124	9.98696	0.603	0.427	2.13725e-121	Leukocytes	Retnla
3.20956e-123	2.4383	0.142	0.52	6.41912e-120	Leukocytes	Ms4a1
9.06206e-123	4.54799	0.629	0.547	1.81241e-119	Leukocytes	Stard8
1.47752e-122	8.87423	0.335	0.197	2.95504e-119	Leukocytes	Adap2os
1.77871e-122	6.62986	0.585	0.406	3.55742e-119	Leukocytes	Fxyd2
5.68725e-122	3.17483	0.61	0.382	1.13745e-118	Leukocytes	BC025920
1.66966e-121	1.84446	0.672	0.539	3.33931e-118	Leukocytes	Xdh
2.50587e-121	7.10151	0.582	0.475	5.01174e-118	Leukocytes	Nfkbid
1.42442e-120	5.26764	0.204	0.45	2.84884e-117	Leukocytes	Cd79a
1.68433e-117	1.72252	0.761	0.648	3.36867e-114	Leukocytes	Nav1
3.77337e-117	6.32633	0.591	0.45	7.54673e-114	Leukocytes	Slc43a2
2.53081e-114	4.33042	0.544	0.248	5.06161e-111	Leukocytes	Aldoc
5.96516e-114	2.68681	0.679	0.568	1.19303e-110	Leukocytes	Arhgap31
6.28657e-114	6.06658	0.575	0.402	1.25731e-110	Leukocytes	Pmaip1
1.12644e-113	2.01206	0.718	0.557	2.25287e-110	Leukocytes	Atp8a1
2.93305e-113	3.8986	0.63	0.517	5.86609e-110	Leukocytes	Arhgap26
8.70649e-111	2.86643	0.654	0.464	1.7413e-107	Leukocytes	Metrnl
1.21756e-110	1.9657	0.659	0.549	2.43511e-107	Leukocytes	Lgals9
5.48468e-110	6.91458	0.356	0.198	1.09694e-106	Leukocytes	Slit1
2.24297e-109	3.66736	0.635	0.481	4.48595e-106	Leukocytes	Nrp2
1.31365e-108	3.26733	0.616	0.584	2.62731e-105	Leukocytes	Oasl2
1.31036e-106	4.79778	0.599	0.44	2.62073e-103	Leukocytes	Il6ra
2.80488e-106	1.54662	0.203	0.448	5.60976e-103	Leukocytes	Scnn1a
9.54983e-106	6.79181	0.526	0.517	1.90997e-102	Leukocytes	Ednrb
5.43194e-104	4.26253	0.544	0.506	1.08639e-100	Leukocytes	Rsad2
1.59871e-103	3.52139	0.641	0.582	3.19742e-100	Leukocytes	Arhgef3
7.94764e-103	3.30507	0.644	0.41	1.58953e-99	Leukocytes	Spp1
3.94208e-101	3.95837	0.587	0.5	7.88415e-98	Leukocytes	Prkch
3.37099e-100	6.6786	0.452	0.424	6.74198e-97	Leukocytes	Gm43661
8.99518e-100	7.01366	0.512	0.418	1.79904e-96	Leukocytes	Gm5086
2.06824e-99	5.02731	0.449	0.349	4.13648e-96	Leukocytes	Spn
3.11663e-99	5.07556	0.532	0.289	6.23327e-96	Leukocytes	Olr1
2.19886e-98	6.58143	0.526	0.389	4.39771e-95	Leukocytes	Btk
2.80409e-98	7.48061	0.274	0.202	5.60818e-95	Leukocytes	Atp6v0d2
3.51969e-98	8.36289	0.466	0.463	7.03938e-95	Leukocytes	Clec4e
1.34854e-96	6.29078	0.492	0.348	2.69709e-93	Leukocytes	Coro2a
2.9408e-92	3.04363	0.612	0.496	5.88159e-89	Leukocytes	Ctnnd2
3.79056e-92	3.06223	0.602	0.434	7.58112e-89	Leukocytes	Acp5
2.0739e-90	2.60449	0.678	0.489	4.1478e-87	Leukocytes	Lsp1
2.27346e-90	2.66949	0.615	0.529	4.54691e-87	Leukocytes	Rad51
9.0599e-90	4.1883	0.612	0.466	1.81198e-86	Leukocytes	Birc5
5.52268e-89	6.90433	0.544	0.403	1.10454e-85	Leukocytes	Rnf180
5.10624e-87	6.18301	0.554	0.5	1.02125e-83	Leukocytes	Rnasel
1.29704e-86	8.03982	0.535	0.496	2.59407e-83	Leukocytes	Slc7a8
2.84393e-86	2.7574	0.56	0.431	5.68785e-83	Leukocytes	Lmo2
3.85271e-84	3.45882	0.57	0.451	7.70542e-81	Leukocytes	Lhfpl3
5.04246e-84	4.24525	0.574	0.305	1.00849e-80	Leukocytes	Kntc1
2.76928e-83	1.61663	0.638	0.519	5.53857e-80	Leukocytes	Lrg1
1.14058e-82	1.92521	0.216	0.444	2.28117e-79	Leukocytes	Gm35021
1.20447e-82	3.56098	0.459	0.426	2.40895e-79	Leukocytes	Klhl6
1.99704e-81	2.21007	0.137	0.271	3.99408e-78	Leukocytes	Hba-a1
4.99776e-80	2.3472	0.239	0.387	9.99553e-77	Leukocytes	Agbl1
5.9393e-79	1.95772	0.589	0.517	1.18786e-75	Leukocytes	Cd93
1.00732e-78	2.87491	0.722	0.603	2.01464e-75	Leukocytes	Lgals3
3.11901e-77	3.39647	0.605	0.466	6.23802e-74	Leukocytes	Tex14
3.50857e-77	7.14126	0.427	0.262	7.01714e-74	Leukocytes	Tnni2
4.61307e-77	4.99518	0.542	0.487	9.22614e-74	Leukocytes	Gm41307
1.90606e-76	2.43423	0.595	0.443	3.81213e-73	Leukocytes	Fbxo47
2.20092e-76	3.91391	0.489	0.369	4.40184e-73	Leukocytes	Myo3b
3.86379e-76	2.67773	0.649	0.549	7.72758e-73	Leukocytes	Prkn
7.32984e-76	5.11349	0.495	0.426	1.46597e-72	Leukocytes	Syngr1
1.64198e-75	6.18695	0.542	0.45	3.28396e-72	Leukocytes	Gm31718
2.75406e-75	2.20729	0.668	0.596	5.50812e-72	Leukocytes	Rgs2
5.14073e-75	1.84768	0.657	0.57	1.02815e-71	Leukocytes	Clec2d
4.16984e-72	1.99929	0.668	0.539	8.33969e-69	Leukocytes	Maml3
1.72765e-71	3.56149	0.585	0.492	3.45531e-68	Leukocytes	Gm16287
1.73778e-69	2.92706	0.208	0.495	3.47557e-66	Leukocytes	Gm15155
7.85942e-69	3.83544	0.577	0.435	1.57188e-65	Leukocytes	Abcg1
1.42805e-68	4.91856	0.482	0.331	2.8561e-65	Leukocytes	Knl1
2.48384e-68	6.07948	0.47	0.368	4.96767e-65	Leukocytes	E330020D12Rik
3.45309e-68	2.8346	0.209	0.499	6.90618e-65	Leukocytes	Cep55
5.38401e-68	5.10119	0.549	0.459	1.0768e-64	Leukocytes	Reps2
8.63445e-68	6.98014	0.507	0.439	1.72689e-64	Leukocytes	Susd1
5.36001e-66	2.74537	0.585	0.43	1.072e-62	Leukocytes	Ptcra
4.22742e-65	3.33307	0.588	0.415	8.45483e-62	Leukocytes	Setdb2
2.1464e-64	3.80917	0.53	0.399	4.29279e-61	Leukocytes	Tmem236
3.38176e-64	4.40544	0.535	0.534	6.76352e-61	Leukocytes	Zbp1
1.13535e-61	1.94474	0.552	0.508	2.27071e-58	Leukocytes	Dner
4.52742e-61	2.10625	0.704	0.603	9.05484e-58	Leukocytes	Cd44
2.88591e-59	6.81037	0.584	0.486	5.77182e-56	Leukocytes	Slpi
2.89561e-59	2.76469	0.58	0.473	5.79121e-56	Leukocytes	Chn2
3.94383e-58	3.89072	0.143	0.264	7.88765e-55	Leukocytes	Ccl17
2.08824e-57	8.0334	0.396	0.365	4.17648e-54	Leukocytes	Gna15
2.70996e-56	9.20347	0.293	0.006	5.41993e-53	Leukocytes	Parvg
7.10631e-56	4.62873	0.481	0.37	1.42126e-52	Leukocytes	Exoc3l2
8.27323e-55	1.81543	0.615	0.5	1.65465e-51	Leukocytes	Exoc6
5.66975e-54	5.98855	0.516	0.324	1.13395e-50	Leukocytes	Nrg2
4.36412e-53	2.36168	0.601	0.503	8.72824e-50	Leukocytes	Irf7
2.75892e-52	3.97776	0.521	0.336	5.51784e-49	Leukocytes	Ckap2l
3.62343e-52	12.1097	0.367	0.104	7.24685e-49	Leukocytes	Siglech
7.91565e-52	3.03427	0.595	0.568	1.58313e-48	Leukocytes	Mob3b
6.48399e-50	4.57546	0.539	0.515	1.2968e-46	Leukocytes	Gm26542
2.06972e-49	7.86752	0.456	0.488	4.13943e-46	Leukocytes	P2ry12
6.67668e-49	3.44415	0.525	0.402	1.33534e-45	Leukocytes	Gm26787
1.02487e-48	4.07613	0.556	0.516	2.04974e-45	Leukocytes	Xlr
1.16549e-48	3.73954	0.562	0.534	2.33097e-45	Leukocytes	Tbc1d4
4.94546e-47	2.37532	0.201	0.335	9.89093e-44	Leukocytes	Ccnb1
3.85834e-46	4.89795	0.514	0.485	7.71669e-43	Leukocytes	Slc40a1
7.97759e-45	1.89946	0.591	0.555	1.59552e-41	Leukocytes	Dapk1
1.15824e-44	2.36315	0.631	0.571	2.31648e-41	Leukocytes	Stmn1
2.37257e-44	3.97851	0.538	0.537	4.74514e-41	Leukocytes	Cenpa
2.95047e-43	7.39001	0.372	0.459	5.90095e-40	Leukocytes	Edil3
1.08581e-42	1.92537	0.616	0.406	2.17163e-39	Leukocytes	Traip
1.11478e-41	2.64568	0.587	0.488	2.22957e-38	Leukocytes	Spag5
1.65044e-41	4.17059	0.522	0.426	3.30088e-38	Leukocytes	Cxcl10
4.52512e-41	9.02978	0.395	0.464	9.05023e-38	Leukocytes	Kcnk13
5.07269e-41	1.77996	0.475	0.472	1.01454e-37	Leukocytes	Lsr
1.99868e-40	5.54694	0.257	0.265	3.99736e-37	Leukocytes	Clec1b
2.44268e-40	1.78034	0.234	0.269	4.88536e-37	Leukocytes	Plin1
3.13061e-40	2.92974	0.568	0.336	6.26122e-37	Leukocytes	Spc24
1.52917e-39	2.38018	0.521	0.435	3.05835e-36	Leukocytes	Gbp5
2.72805e-38	5.84201	0.319	0.335	5.4561e-35	Leukocytes	Barx2
3.25057e-38	1.5087	0.578	0.568	6.50114e-35	Leukocytes	Ifit1
3.49431e-38	1.72671	0.529	0.494	6.98861e-35	Leukocytes	Gm16104
2.21424e-37	5.06332	0.48	0.263	4.42848e-34	Leukocytes	Pkp3
1.3386e-36	1.75915	0.639	0.586	2.67721e-33	Leukocytes	Smyd3
2.18426e-36	2.17766	0.411	0.401	4.36852e-33	Leukocytes	Ak8
3.48624e-36	3.36054	0.523	0.503	6.97249e-33	Leukocytes	Cdca8
3.65849e-36	4.29107	0.468	0.408	7.31697e-33	Leukocytes	Gsg1
7.7239e-36	2.67743	0.442	0.467	1.54478e-32	Leukocytes	Kdr
1.78348e-35	2.51122	0.574	0.457	3.56695e-32	Leukocytes	Cks2
2.86965e-34	2.11957	0.517	0.527	5.7393e-31	Leukocytes	Ptgs1
3.13038e-34	6.63233	0.354	0.435	6.26077e-31	Leukocytes	Il1r2
7.08185e-34	6.37381	0.468	0.387	1.41637e-30	Leukocytes	2610203C22Rik
1.02407e-33	5.83627	0.44	0.49	2.04814e-30	Leukocytes	Cdkn2a
1.45849e-33	5.36905	0.456	0.416	2.91698e-30	Leukocytes	Adam8
1.02119e-32	5.09809	0.521	0.533	2.04238e-29	Leukocytes	Ifitm1
6.00794e-32	7.59652	0.367	0.242	1.20159e-28	Leukocytes	Rasgrp3
9.59661e-32	4.01986	0.536	0.372	1.91932e-28	Leukocytes	Skap1
1.80146e-31	1.78983	0.302	0.488	3.60291e-28	Leukocytes	Cfap45
2.01011e-31	2.15324	0.55	0.397	4.02022e-28	Leukocytes	Nrcam
1.59125e-30	1.82325	0.488	0.417	3.18251e-27	Leukocytes	Epha5
1.8713e-30	3.07828	0.217	0.265	3.74259e-27	Leukocytes	Ifi205
2.41388e-30	6.36819	0.342	0.274	4.82776e-27	Leukocytes	Mctp2
2.47412e-30	3.68632	0.277	0.512	4.94823e-27	Leukocytes	Cenpe
4.31379e-30	3.03358	0.474	0.324	8.62757e-27	Leukocytes	F730043M19Rik
1.20094e-29	3.04829	0.508	0.568	2.40188e-26	Leukocytes	Kcnc2
5.68855e-29	3.27878	0.227	0.307	1.13771e-25	Leukocytes	Esco2
6.41651e-29	1.6275	0.623	0.591	1.2833e-25	Leukocytes	Capg
6.68336e-29	3.57502	0.536	0.515	1.33667e-25	Leukocytes	Top2a
2.89727e-28	4.75841	0.262	0.338	5.79454e-25	Leukocytes	Iqgap3
5.22672e-28	4.46206	0.461	0.479	1.04534e-24	Leukocytes	Cdk1
1.36084e-27	4.09484	0.43	0.277	2.72169e-24	Leukocytes	Rad51ap1
2.46944e-27	1.9078	0.065	0.32	4.93887e-24	Leukocytes	Shcbp1l
2.50744e-27	2.08833	0.57	0.495	5.01488e-24	Leukocytes	1600010M07Rik
5.62338e-27	4.36454	0.49	0.449	1.12468e-23	Leukocytes	Arl5c
1.85559e-26	5.54275	0.137	0.41	3.71118e-23	Leukocytes	Ube2c
1.93344e-25	1.50524	0.289	0.462	3.86688e-22	Leukocytes	Sema6a
1.99137e-25	2.16425	0.526	0.504	3.98274e-22	Leukocytes	Igtp
4.75143e-24	3.05486	0.514	0.507	9.50286e-21	Leukocytes	Cdkn3
1.60028e-22	1.69396	0.525	0.397	3.20056e-19	Leukocytes	Slc39a8
6.65167e-22	1.60331	0.67	0.54	1.33033e-18	Leukocytes	Fabp5
1.26254e-21	5.17816	0.463	0.462	2.52508e-18	Leukocytes	Cfap299
1.99944e-21	3.03896	0.586	0.439	3.99887e-18	Leukocytes	Kif11
3.14671e-21	3.39925	0.397	0.174	6.29342e-18	Leukocytes	Gcnt1
4.37775e-21	5.80869	0.447	0.478	8.7555e-18	Leukocytes	Adgrg6
5.322e-21	4.26324	0.164	0.376	1.0644e-17	Leukocytes	Ccna2
2.84679e-20	2.8112	0.478	0.536	5.69359e-17	Leukocytes	S1pr1
2.91205e-20	2.2469	0.489	0.51	5.82411e-17	Leukocytes	Gm26827
4.55314e-20	4.51727	0.3	0.482	9.10628e-17	Leukocytes	Ptchd1
3.25909e-18	3.11497	0.489	0.447	6.51817e-15	Leukocytes	Hist1h1b
5.66957e-18	3.15192	0.476	0.532	1.13391e-14	Leukocytes	Spc25
1.37334e-17	1.94368	0.338	0.501	2.74669e-14	Leukocytes	Ezr
2.53736e-17	2.12547	0.625	0.645	5.07472e-14	Leukocytes	Hist1h2ap
4.3558e-17	7.12046	0.359	0.426	8.7116e-14	Leukocytes	Cxcr4
6.68746e-17	2.3087	0.299	0.429	1.33749e-13	Leukocytes	Frmpd4
9.17582e-17	2.87068	0.555	0.539	1.83516e-13	Leukocytes	Lmnb1
1.23336e-16	3.39648	0.428	0.511	2.46672e-13	Leukocytes	F830016B08Rik
1.39246e-16	1.50131	0.355	0.479	2.78493e-13	Leukocytes	Nol4l
1.44268e-16	2.32207	0.531	0.564	2.88536e-13	Leukocytes	Gbp7
1.15681e-15	3.15981	0.412	0.438	2.31361e-12	Leukocytes	Apold1
1.70848e-15	3.2961	0.527	0.429	3.41697e-12	Leukocytes	Hist1h2ae
3.79703e-15	1.77212	0.509	0.408	7.59407e-12	Leukocytes	2810403D21Rik
6.51927e-15	4.93236	0.247	0.285	1.30385e-11	Leukocytes	Ptprcap
2.03092e-14	4.16022	0.517	0.288	4.06185e-11	Leukocytes	Kif4
2.46855e-14	1.70711	0.58	0.572	4.9371e-11	Leukocytes	Apba1
2.59292e-14	2.08576	0.533	0.51	5.18583e-11	Leukocytes	Rbbp8
3.82062e-14	3.34581	0.284	0.449	7.64124e-11	Leukocytes	5730522E02Rik
6.56819e-14	2.05388	0.434	0.333	1.31364e-10	Leukocytes	Pdgfb
1.11918e-12	3.90556	0.215	0.361	2.23836e-09	Leukocytes	Kif15
1.32633e-11	4.33223	0.377	0.465	2.65266e-08	Leukocytes	Mbp
2.81581e-11	1.95636	0.332	0.445	5.63161e-08	Leukocytes	Slc2a3
6.33972e-11	8.91677	0.464	0.262	1.26794e-07	Leukocytes	Cpa3
6.73047e-11	2.58506	0.477	0.431	1.34609e-07	Leukocytes	2310040G24Rik
1.5556e-10	1.8893	0.595	0.44	3.1112e-07	Leukocytes	Kcnd2
1.90663e-10	5.79364	0.384	0.373	3.81326e-07	Leukocytes	Pkib
6.37298e-10	1.99708	0.523	0.524	1.2746e-06	Leukocytes	March3
9.55137e-10	2.76817	0.161	0.269	1.91027e-06	Leukocytes	Lgals7
1.00586e-09	1.51842	0.563	0.585	2.01172e-06	Leukocytes	Wwox
2.32468e-09	3.69766	0.439	0.512	4.64935e-06	Leukocytes	Lck
5.26484e-09	4.97854	0.421	0.386	1.05297e-05	Leukocytes	Arhgap4
5.91106e-09	4.71001	0.174	0.369	1.18221e-05	Leukocytes	Ncapg
8.85988e-09	3.08872	0.459	0.51	1.77198e-05	Leukocytes	Gm20186
2.47751e-08	6.20376	0.241	0.472	4.95502e-05	Leukocytes	Hmmr
5.89773e-08	1.55477	0.499	0.53	0.000117955	Leukocytes	Itpr2
1.33757e-07	2.08864	0.484	0.452	0.000267513	Leukocytes	Fkbp5
2.67565e-07	2.81515	0.494	0.558	0.000535129	Leukocytes	Cadm1
2.90597e-07	4.20342	0.403	0.475	0.000581193	Leukocytes	Efcab11
7.10437e-07	2.00334	0.318	0.372	0.00142087	Leukocytes	Gm15563
7.21144e-07	2.09019	0.491	0.473	0.00144229	Leukocytes	Slc9a3r1
1.05096e-06	3.08675	0.497	0.374	0.00210192	Leukocytes	Cd5
1.73194e-06	3.06827	0.39	0.38	0.00346388	Leukocytes	Prox1
2.31581e-06	4.81669	0.435	0.375	0.00463162	Leukocytes	Ltb4r1
4.77285e-06	5.50679	0.358	0.391	0.0095457	Leukocytes	Pkd1l2
6.45948e-06	3.57997	0.535	0.414	0.012919	Leukocytes	Adgrl3
1.50139e-05	2.20062	0.454	0.451	0.0300277	Leukocytes	Gm29585
2.45548e-05	3.9918	0.472	0.478	0.0491096	Leukocytes	Ccnb2
2.6768e-05	1.56399	0.553	0.384	0.053536	Leukocytes	Ptgs2os
2.82713e-05	1.60758	0.5	0.368	0.0565426	Leukocytes	Tex22
3.44885e-05	2.00413	0.502	0.401	0.068977	Leukocytes	Gm16685
7.12966e-05	7.45555	0.25	0.099	0.142593	Leukocytes	Ear2
7.24911e-05	1.82106	0.521	0.314	0.144982	Leukocytes	Htr2b
0.000100742	5.54505	0.285	0.469	0.201484	Leukocytes	Cnr2
0.000126872	4.20505	0.29	0.385	0.253745	Leukocytes	Jaml
0.000392856	2.02364	0.493	0.552	0.785712	Leukocytes	Stk10
0.000407137	2.93704	0.262	0.352	0.814273	Leukocytes	Gabbr2
0.000434639	1.93193	0.557	0.483	0.869279	Leukocytes	Serpinb1a
0.000916391	3.53885	0.372	0.449	1	Leukocytes	Uhrf1
0.000975615	2.8607	0.36	0.239	1	Leukocytes	Ctla2a
0.00182888	3.5496	0.243	0.483	1	Leukocytes	Melk
0.00301541	1.92771	0.546	0.545	1	Leukocytes	Prc1
0.00719959	3.50862	0.318	0.359	1	Leukocytes	Hhex
0.00792362	1.95807	0.412	0.525	1	Leukocytes	Fhit
0	3.14449	0.798	0.136	0	SMC minor	Eya1
0	5.7083	0.673	0.044	0	SMC minor	Tspan8
0	4.06328	0.769	0.268	0	SMC minor	Shox2
0	2.31208	0.822	0.383	0	SMC minor	Ibsp
0	5.67048	0.934	0.497	0	SMC minor	Adamtsl1
0	4.03901	0.616	0.18	0	SMC minor	Megf10
0	2.71033	0.858	0.446	0	SMC minor	Gm29570
0	4.03751	0.838	0.426	0	SMC minor	Gm35021
0	4.8804	0.799	0.388	0	SMC minor	Kctd8
0	1.73759	0.829	0.419	0	SMC minor	Syngr1
0	4.14297	0.86	0.454	0	SMC minor	Prss12
0	5.67426	0.812	0.41	0	SMC minor	Mdga2
0	3.36421	0.899	0.517	0	SMC minor	Rgs5
0	6.54861	0.787	0.416	0	SMC minor	Pak7
0	3.01435	0.826	0.461	0	SMC minor	Gpc5
0	3.76493	0.912	0.578	0	SMC minor	Mia
0	3.08288	0.897	0.576	0	SMC minor	Piezo2
0	3.94981	0.889	0.578	0	SMC minor	Grid2
0	2.71353	0.935	0.694	0	SMC minor	Lamc3
0	3.0145	0.96	0.719	0	SMC minor	Phactr1
0	3.11814	0.944	0.71	0	SMC minor	Pdzrn4
0	2.24447	0.948	0.745	0	SMC minor	Tmtc2
0	2.05621	0.972	0.789	0	SMC minor	Smoc1
0	1.55285	0.985	0.846	0	SMC minor	Mfap5
3.49817e-299	2.65577	0.911	0.518	6.99634e-296	SMC minor	Ltbp2
6.29027e-294	2.07002	0.961	0.737	1.25805e-290	SMC minor	Gxylt2
1.29339e-290	1.65472	0.854	0.548	2.58678e-287	SMC minor	Cadm1
3.17988e-289	2.67832	0.862	0.489	6.35976e-286	SMC minor	Fez1
2.60466e-288	3.32654	0.749	0.45	5.20932e-285	SMC minor	Brinp1
1.8563e-287	2.34811	0.843	0.478	3.7126e-284	SMC minor	Gm36037
1.88766e-287	2.62928	0.784	0.372	3.77532e-284	SMC minor	Gpha2
2.86962e-283	4.18325	0.798	0.525	5.73924e-280	SMC minor	Nlgn1
4.3208e-283	1.73566	0.81	0.369	8.6416e-280	SMC minor	Pglyrp1
6.75215e-282	4.33801	0.818	0.469	1.35043e-278	SMC minor	Pde10a
1.45402e-281	2.18037	0.784	0.138	2.90804e-278	SMC minor	BC028471
3.08812e-277	3.81826	0.805	0.429	6.17624e-274	SMC minor	Prrx2
4.61866e-277	1.65039	0.846	0.459	9.23732e-274	SMC minor	Rasef
8.69477e-275	1.55538	0.828	0.413	1.73895e-271	SMC minor	Grm7
1.1484e-272	4.81026	0.767	0.517	2.29679e-269	SMC minor	Hcn1
5.97648e-270	1.91289	0.943	0.719	1.1953e-266	SMC minor	Sfrp2
2.11381e-267	4.13884	0.867	0.599	4.22762e-264	SMC minor	Kcnip4
6.47477e-262	4.27173	0.784	0.383	1.29495e-258	SMC minor	Dgki
2.03772e-260	3.47802	0.81	0.554	4.07545e-257	SMC minor	Frzb
1.12146e-258	1.84742	0.816	0.499	2.24292e-255	SMC minor	Cntn4
2.79411e-256	2.66956	0.787	0.503	5.58823e-253	SMC minor	Lck
4.79076e-245	2.23941	0.804	0.488	9.58152e-242	SMC minor	Gm16287
1.76851e-242	4.57147	0.746	0.36	3.53702e-239	SMC minor	BB557941
5.60976e-234	1.53398	0.801	0.353	1.12195e-230	SMC minor	Npy
2.2468e-231	1.80744	0.818	0.487	4.49359e-228	SMC minor	Dhrs9
7.14653e-226	4.19531	0.749	0.476	1.42931e-222	SMC minor	Hapln1
1.08601e-225	1.85858	0.809	0.62	2.17203e-222	SMC minor	Eps8
2.32387e-225	1.63038	0.812	0.497	4.64774e-222	SMC minor	BC028777
1.88677e-224	3.21035	0.803	0.494	3.77354e-221	SMC minor	Cacna2d3
9.38276e-224	1.56179	0.981	0.862	1.87655e-220	SMC minor	Limch1
3.93767e-223	4.55467	0.735	0.486	7.87534e-220	SMC minor	Il1rapl2
1.65703e-222	1.6224	0.779	0.436	3.31405e-219	SMC minor	Ttn
2.10778e-217	5.25843	0.721	0.457	4.21556e-214	SMC minor	Hs6st3
4.84649e-217	2.32688	0.862	0.671	9.69299e-214	SMC minor	Bmpr1b
5.52091e-215	1.7774	0.884	0.694	1.10418e-211	SMC minor	Sema3c
1.59617e-213	2.65057	0.838	0.546	3.19235e-210	SMC minor	Zfp385b
1.78957e-212	2.05957	0.886	0.704	3.57914e-209	SMC minor	Osr1
3.1207e-208	5.76265	0.699	0.393	6.24141e-205	SMC minor	Dlx6os1
1.07372e-200	1.54834	0.955	0.761	2.14744e-197	SMC minor	Meg3
1.14939e-198	3.28164	0.769	0.506	2.29878e-195	SMC minor	Glis3
7.65975e-197	3.63204	0.713	0.422	1.53195e-193	SMC minor	Gm46323
6.35268e-189	2.26937	0.697	0.537	1.27054e-185	SMC minor	Cdh9
6.60406e-187	5.35823	0.568	0.276	1.32081e-183	SMC minor	Tfap2b
2.77027e-185	2.44459	0.854	0.704	5.54053e-182	SMC minor	Pde4d
7.68194e-185	2.1118	0.845	0.621	1.53639e-181	SMC minor	Vcan
1.73813e-184	3.51763	0.764	0.474	3.47627e-181	SMC minor	Enpp2
1.90896e-184	3.13993	0.757	0.582	3.81792e-181	SMC minor	Gria3
3.9175e-178	1.56464	0.841	0.552	7.83501e-175	SMC minor	Eml6
1.20706e-171	2.68115	0.704	0.474	2.41412e-168	SMC minor	Gpr176
2.33971e-171	2.52167	0.793	0.544	4.67942e-168	SMC minor	Chsy3
2.90898e-169	2.6088	0.803	0.671	5.81796e-166	SMC minor	2210407C18Rik
4.06299e-168	2.40789	0.817	0.624	8.12598e-165	SMC minor	Cacna1d
5.62889e-168	2.50503	0.799	0.557	1.12578e-164	SMC minor	Bdnf
3.94387e-163	2.64341	0.738	0.406	7.88773e-160	SMC minor	Olfr543
7.80002e-160	1.56271	0.742	0.472	1.56e-156	SMC minor	Cdk1
9.80149e-160	3.10017	0.697	0.474	1.9603e-156	SMC minor	Gng2
1.20221e-158	3.7335	0.696	0.491	2.40441e-155	SMC minor	Negr1
2.47562e-156	5.15561	0.492	0.34	4.95124e-153	SMC minor	Gm48727
3.6363e-156	1.92016	0.755	0.505	7.27259e-153	SMC minor	Usp18
2.89515e-153	2.40001	0.772	0.541	5.7903e-150	SMC minor	Sgip1
1.25535e-149	2.29994	0.721	0.464	2.51071e-146	SMC minor	C79798
1.007e-148	2.06992	0.808	0.587	2.014e-145	SMC minor	Arl15
2.45361e-145	4.06682	0.675	0.441	4.90722e-142	SMC minor	Cdh18
8.01604e-140	2.00244	0.684	0.496	1.60321e-136	SMC minor	Adgrd1
4.9078e-138	5.84812	0.609	0.415	9.81559e-135	SMC minor	Dlx6
5.42479e-131	1.79595	0.721	0.404	1.08496e-127	SMC minor	Nptx2
1.17387e-129	2.06016	0.765	0.545	2.34773e-126	SMC minor	Kcnj15
7.09356e-126	1.62726	0.738	0.516	1.41871e-122	SMC minor	Ddit4l
2.20335e-125	2.00063	0.698	0.45	4.4067e-122	SMC minor	Spock2
7.19379e-125	1.88902	0.697	0.511	1.43876e-121	SMC minor	Cntn6
7.13579e-118	3.28467	0.682	0.502	1.42716e-114	SMC minor	2610307P16Rik
5.80152e-117	2.3821	0.685	0.529	1.1603e-113	SMC minor	Ntng1
5.54958e-116	4.30409	0.605	0.405	1.10992e-112	SMC minor	Coch
2.42268e-115	2.34795	0.688	0.492	4.84537e-112	SMC minor	Gm26771
8.17099e-113	1.94569	0.659	0.398	1.6342e-109	SMC minor	Tmem151a
3.53702e-112	6.07335	0.589	0.426	7.07405e-109	SMC minor	Fgf12
9.22245e-112	3.2199	0.623	0.374	1.84449e-108	SMC minor	Ror2
3.2905e-111	2.32912	0.696	0.381	6.58099e-108	SMC minor	Gm35721
9.06216e-110	3.37089	0.664	0.548	1.81243e-106	SMC minor	Dach1
7.04541e-109	2.33033	0.634	0.362	1.40908e-105	SMC minor	Eya2
8.89682e-109	1.54764	0.824	0.645	1.77936e-105	SMC minor	Fibin
2.49174e-107	2.75652	0.716	0.412	4.98348e-104	SMC minor	9330111N05Rik
1.39762e-105	2.62465	0.662	0.431	2.79524e-102	SMC minor	Prph
1.638e-104	2.11589	0.722	0.514	3.27601e-101	SMC minor	Crispld1
9.41731e-103	5.22181	0.56	0.446	1.88346e-99	SMC minor	Ralyl
2.31528e-101	4.51459	0.448	0.356	4.63055e-98	SMC minor	Hs3st5
6.69528e-100	3.85546	0.548	0.441	1.33906e-96	SMC minor	Lgr5
7.00604e-100	1.74965	0.682	0.502	1.40121e-96	SMC minor	Gm47167
1.00739e-95	2.96429	0.59	0.346	2.01479e-92	SMC minor	Dync1i1
2.22915e-90	2.63866	0.597	0.493	4.4583e-87	SMC minor	Ncam2
5.49483e-90	2.52217	0.564	0.363	1.09897e-86	SMC minor	Cxadr
1.56359e-88	4.84719	0.565	0.355	3.12719e-85	SMC minor	Dlx5
5.01672e-87	2.60168	0.627	0.497	1.00334e-83	SMC minor	Nt5dc2
1.58644e-86	1.74918	0.6	0.407	3.17289e-83	SMC minor	Frmd5
1.03209e-82	5.86172	0.486	0.36	2.06418e-79	SMC minor	Grem1
1.13634e-81	1.68176	0.299	0.034	2.27267e-78	SMC minor	Smim22
4.04723e-80	2.15547	0.416	0.255	8.09446e-77	SMC minor	Aldoc
2.97259e-76	1.97588	0.602	0.434	5.94517e-73	SMC minor	Slc22a2
5.31857e-76	5.48836	0.507	0.315	1.06371e-72	SMC minor	Lrrc7
3.65808e-71	1.51639	0.762	0.591	7.31615e-68	SMC minor	Tenm3
8.2996e-69	1.78002	0.611	0.582	1.65992e-65	SMC minor	Chrm2
1.21109e-64	1.5575	0.673	0.469	2.42219e-61	SMC minor	Nol4l
1.2941e-61	3.64689	0.395	0.291	2.58821e-58	SMC minor	Nell2
1.29286e-60	1.50161	0.552	0.42	2.58571e-57	SMC minor	Arhgap28
1.18418e-59	1.623	0.687	0.636	2.36836e-56	SMC minor	Calcrl
6.27094e-59	5.95615	0.331	0.128	1.25419e-55	SMC minor	Barx1
5.43089e-57	2.17448	0.573	0.432	1.08618e-53	SMC minor	Nrn1
3.84728e-53	1.68802	0.682	0.574	7.69456e-50	SMC minor	Kctd16
4.39701e-52	1.51455	0.557	0.475	8.79401e-49	SMC minor	Ephb1
6.70523e-48	1.78763	0.63	0.543	1.34105e-44	SMC minor	Prex2
1.5304e-44	1.64619	0.28	0.421	3.06079e-41	SMC minor	Muc16
3.90826e-43	2.06515	0.512	0.455	7.81652e-40	SMC minor	Ano3
2.1662e-40	2.35992	0.61	0.558	4.3324e-37	SMC minor	Lrp1b
3.43257e-39	1.61317	0.63	0.544	6.86515e-36	SMC minor	Sox9
3.14989e-38	1.50567	0.424	0.332	6.29977e-35	SMC minor	Gm12153
3.3049e-37	1.69538	0.525	0.441	6.6098e-34	SMC minor	Ifit3b
1.32403e-29	1.96755	0.414	0.356	2.64805e-26	SMC minor	Depp1
1.11539e-27	2.82672	0.221	0.386	2.23079e-24	SMC minor	Calcb
1.72902e-27	1.58575	0.497	0.367	3.45805e-24	SMC minor	Gm15563
6.2555e-26	2.58436	0.369	0.229	1.2511e-22	SMC minor	Gja3
4.4776e-24	3.40324	0.264	0.241	8.95521e-21	SMC minor	Nkx3-1
1.50276e-19	1.55256	0.537	0.47	3.00551e-16	SMC minor	Gm4117
7.40761e-18	2.00501	0.497	0.44	1.48152e-14	SMC minor	Slc2a3
4.5901e-16	1.98469	0.438	0.39	9.1802e-13	SMC minor	Galntl6
5.15813e-15	1.52591	0.504	0.47	1.03163e-11	SMC minor	Metrnl
1.3503e-14	2.10048	0.389	0.419	2.7006e-11	SMC minor	Pcnx2
1.38e-14	3.76515	0.377	0.402	2.76001e-11	SMC minor	Fgfbp1
1.34027e-13	1.88428	0.236	0.481	2.68055e-10	SMC minor	Pthlh
2.82019e-13	2.21727	0.225	0.366	5.64037e-10	SMC minor	Ncapg
3.99529e-13	1.76596	0.391	0.406	7.99059e-10	SMC minor	Gm26787
6.34556e-13	2.03771	0.484	0.48	1.26911e-09	SMC minor	Timp4
7.16375e-11	1.8069	0.457	0.444	1.43275e-07	SMC minor	Cox4i2
4.51093e-09	1.55439	0.361	0.409	9.02186e-06	SMC minor	Grip1
9.94417e-09	1.94976	0.406	0.433	1.98883e-05	SMC minor	Cldn3
1.70542e-08	1.81951	0.228	0.401	3.41084e-05	SMC minor	Gm20757
1.66676e-07	3.32303	0.202	0.383	0.000333353	SMC minor	Adgrb3
3.01411e-06	2.67706	0.085	0.425	0.00602821	SMC minor	4930512B01Rik
7.37149e-06	2.24014	0.318	0.425	0.014743	SMC minor	Gm41333
8.60746e-05	2.11723	0.388	0.45	0.172149	SMC minor	Gm26691
0.000369303	3.56183	0.258	0.33	0.738605	SMC minor	S100g
0.000408831	3.34861	0.279	0.312	0.817662	SMC minor	Shcbp1l
0.000427427	1.55593	0.422	0.45	0.854855	SMC minor	Gm17167
0.00108295	2.41275	0.387	0.337	1	SMC minor	Gm20629
0	6.41364	0.741	0.079	0	Endothelial	Dsg2
0	10.6825	0.854	0.197	0	Endothelial	Cdh5
0	11.0121	0.682	0.026	0	Endothelial	Arhgef15
0	9.47165	0.945	0.296	0	Endothelial	Icam2
0	9.75534	0.679	0.059	0	Endothelial	She
0	10.8066	0.845	0.241	0	Endothelial	Tie1
0	11.8492	0.676	0.077	0	Endothelial	Serpina1d
0	9.28973	0.886	0.291	0	Endothelial	Bmx
0	7.30767	0.881	0.288	0	Endothelial	Car8
0	10.1851	0.973	0.397	0	Endothelial	Egfl7
0	12.5605	0.563	0	0	Endothelial	Ugt8a
0	7.04053	0.994	0.433	0	Endothelial	Pecam1
0	8.4091	0.573	0.027	0	Endothelial	Gimap1
0	9.1124	0.715	0.172	0	Endothelial	Cfi
0	4.4199	0.67	0.131	0	Endothelial	Fam167a
0	3.17575	0.572	0.074	0	Endothelial	AI661453
0	10.0521	0.488	0.001	0	Endothelial	Hoxa9
0	7.55449	0.68	0.195	0	Endothelial	Adh7
0	5.30375	0.912	0.438	0	Endothelial	Slc9a3r2
0	9.78851	0.811	0.338	0	Endothelial	Dhh
0	7.64598	0.908	0.436	0	Endothelial	Ecscr
0	6.71595	0.824	0.353	0	Endothelial	Procr
0	9.61891	0.968	0.506	0	Endothelial	Vwf
0	8.84304	0.818	0.359	0	Endothelial	Mall
0	6.26349	0.92	0.466	0	Endothelial	Tek
0	9.58949	0.878	0.427	0	Endothelial	Podxl
0	5.63038	0.988	0.537	0	Endothelial	Ramp2
0	10.5302	0.888	0.438	0	Endothelial	Palmd
0	8.89115	0.847	0.404	0	Endothelial	Kcnn4
0	8.246	0.893	0.455	0	Endothelial	Bmp6
0	7.70911	0.97	0.532	0	Endothelial	Ptprb
0	10.7774	0.836	0.399	0	Endothelial	Emcn
0	8.64527	0.925	0.496	0	Endothelial	Mmrn2
0	4.81331	0.974	0.555	0	Endothelial	Heg1
0	5.42313	0.911	0.495	0	Endothelial	Cbfa2t3
0	4.46413	0.959	0.55	0	Endothelial	Cavin2
0	5.7584	0.982	0.575	0	Endothelial	Cytl1
0	7.2243	0.915	0.511	0	Endothelial	Cd93
0	4.73866	0.905	0.504	0	Endothelial	F11r
0	4.3809	0.899	0.512	0	Endothelial	Ece1
0	10.8603	0.437	0.05	0	Endothelial	Klhl4
0	5.37445	0.938	0.558	0	Endothelial	Esam
0	4.4005	0.551	0.174	0	Endothelial	Wfdc2
0	4.44784	0.915	0.539	0	Endothelial	Stab1
0	4.76036	0.896	0.524	0	Endothelial	Srgn
0	4.57836	0.881	0.513	0	Endothelial	Cmip
0	5.06487	0.941	0.574	0	Endothelial	Cgnl1
0	8.88828	0.865	0.498	0	Endothelial	Nos3
0	6.49405	0.398	0.032	0	Endothelial	Sh3tc2
0	11.0055	0.391	0.027	0	Endothelial	Adgrl4
0	6.20643	0.497	0.134	0	Endothelial	Ifi44
0	12.2557	0.845	0.483	0	Endothelial	Klk10
0	10.557	0.747	0.388	0	Endothelial	AU021092
0	6.81031	0.845	0.494	0	Endothelial	Fgd5
0	6.3482	0.875	0.527	0	Endothelial	S1pr1
0	3.15582	0.934	0.587	0	Endothelial	Ly6e
0	3.87967	0.957	0.638	0	Endothelial	Sfrp1
0	3.01093	0.923	0.615	0	Endothelial	Fbln2
0	7.29437	0.84	0.533	0	Endothelial	Cd24a
0	4.68353	0.891	0.592	0	Endothelial	Spon1
0	6.69072	0.398	0.116	0	Endothelial	Tac2
0	3.84061	0.968	0.687	0	Endothelial	Epas1
0	3.93856	0.942	0.668	0	Endothelial	Ptprj
0	2.90281	0.935	0.669	0	Endothelial	Ppp3ca
0	2.93764	0.928	0.664	0	Endothelial	Fxyd5
0	4.61369	0.307	0.053	0	Endothelial	Tspan8
0	2.7699	0.979	0.756	0	Endothelial	Ctsh
0	9.28216	0.433	0.22	0	Endothelial	Gimap5
0	2.81082	0.943	0.768	0	Endothelial	Ehd4
0	2.61968	0.977	0.807	0	Endothelial	H2-D1
0	2.06961	0.983	0.821	0	Endothelial	Apoe
0	2.95217	0.988	0.843	0	Endothelial	H2-K1
0	1.89937	0.983	0.879	0	Endothelial	Cfh
0	2.57756	0.994	0.899	0	Endothelial	Clu
0	2.1999	0.99	0.954	0	Endothelial	Tm4sf1
1.29874e-307	6.18952	0.641	0.238	2.59748e-304	Endothelial	Gap43
5.52733e-305	4.20943	0.882	0.566	1.10547e-301	Endothelial	Arhgap31
3.63108e-303	9.88738	0.781	0.365	7.26217e-300	Endothelial	Pkhd1l1
3.37487e-300	9.49365	0.783	0.448	6.74973e-297	Endothelial	Adgrf5
4.70081e-297	5.04188	0.822	0.428	9.40163e-294	Endothelial	Lmo2
1.75396e-296	3.50261	0.884	0.694	3.50792e-293	Endothelial	Vcam1
2.17968e-291	6.34007	0.787	0.393	4.35935e-288	Endothelial	H2-Q7
9.68541e-290	6.15754	0.771	0.42	1.93708e-286	Endothelial	Klhl6
2.58129e-288	9.19505	0.72	0.413	5.16258e-285	Endothelial	Sema3g
4.22888e-286	1.91556	0.973	0.873	8.45776e-283	Endothelial	Cav1
2.87418e-285	9.64472	0.675	0.365	5.74835e-282	Endothelial	Irf6
1.46038e-283	4.71621	0.829	0.587	2.92075e-280	Endothelial	Adh1
3.95109e-283	8.65224	0.769	0.505	7.90219e-280	Endothelial	St6galnac3
1.44043e-282	7.185	0.796	0.481	2.88085e-279	Endothelial	H2-Q6
1.38123e-281	8.3317	0.785	0.371	2.76245e-278	Endothelial	Itgb4
1.71494e-280	10.8711	0.706	0.175	3.42988e-277	Endothelial	Sox17
8.6485e-280	3.57688	0.702	0.183	1.7297e-276	Endothelial	Bst1
7.62321e-275	1.68675	0.983	0.882	1.52464e-271	Endothelial	Sptbn1
7.1337e-274	3.38176	0.702	0.237	1.42674e-270	Endothelial	Oasl1
3.18894e-271	10.7348	0.751	0.266	6.37789e-268	Endothelial	Selp
1.08132e-270	2.68828	0.952	0.746	2.16264e-267	Endothelial	Tmtc2
1.49826e-270	2.52458	0.958	0.764	2.99653e-267	Endothelial	Ace
1.11252e-268	2.57053	0.9	0.671	2.22503e-265	Endothelial	Tmem176b
3.38529e-266	10.364	0.773	0.303	6.77059e-263	Endothelial	Gja5
1.57853e-265	10.8366	0.743	0.488	3.15706e-262	Endothelial	Cldn5
5.39259e-262	2.58752	0.914	0.633	1.07852e-258	Endothelial	Ablim1
3.81433e-257	2.4939	0.921	0.739	7.62866e-254	Endothelial	Gxylt2
1.85723e-256	3.72645	0.863	0.579	3.71445e-253	Endothelial	Eng
2.45258e-255	2.44985	0.968	0.819	4.90516e-252	Endothelial	Klf2
3.36815e-255	4.49975	0.771	0.5	6.73629e-252	Endothelial	Il2rg
3.9854e-253	3.03778	0.854	0.546	7.9708e-250	Endothelial	Lgals9
1.56859e-252	3.00672	0.909	0.689	3.13718e-249	Endothelial	Nrp1
2.80918e-251	5.41147	0.776	0.489	5.61836e-248	Endothelial	Gm16104
9.52799e-250	9.23337	0.679	0.227	1.9056e-246	Endothelial	Prrt4
6.80707e-249	7.87432	0.751	0.152	1.36141e-245	Endothelial	Serpina3g
7.19814e-249	3.18658	0.795	0.375	1.43963e-245	Endothelial	2310039L15Rik
3.05351e-246	4.33332	0.836	0.523	6.10702e-243	Endothelial	Itpr2
2.53107e-244	7.19741	0.762	0.408	5.06214e-241	Endothelial	Rasgrf2
5.21592e-243	3.07528	0.924	0.741	1.04318e-239	Endothelial	Lars2
3.33897e-240	2.86149	0.906	0.637	6.67794e-237	Endothelial	Elmo1
8.46907e-240	5.32687	0.781	0.492	1.69381e-236	Endothelial	Clec14a
3.14302e-239	3.2136	0.79	0.43	6.28604e-236	Endothelial	Wt1
1.41018e-237	2.68308	0.795	0.369	2.82036e-234	Endothelial	Ltb4r1
1.23021e-236	2.25883	0.79	0.283	2.46042e-233	Endothelial	Nell2
2.84896e-236	7.5385	0.258	0.09	5.69793e-233	Endothelial	Cyp4b1
6.51105e-236	9.52891	0.628	0.138	1.30221e-232	Endothelial	Serpina1e
3.592e-230	4.31242	0.774	0.516	7.184e-227	Endothelial	Tnfaip2
1.56874e-229	6.47985	0.766	0.54	3.13747e-226	Endothelial	Slco2a1
1.76124e-227	8.65596	0.626	0.276	3.52247e-224	Endothelial	Clec1a
6.94253e-226	2.81666	0.785	0.466	1.38851e-222	Endothelial	Itgae
1.92391e-224	10.0693	0.709	0.269	3.84783e-221	Endothelial	Gkn3
7.1437e-222	8.1134	0.686	0.294	1.42874e-218	Endothelial	Mal
4.67667e-216	12.2214	0.468	0.042	9.35334e-213	Endothelial	Serpina1b
2.10073e-215	5.65008	0.769	0.504	4.20147e-212	Endothelial	Ldb2
2.68283e-213	6.98984	0.719	0.234	5.36566e-210	Endothelial	Ctla2a
4.85622e-213	6.63875	0.716	0.35	9.71244e-210	Endothelial	Hhex
8.52486e-213	10.0944	0.667	0.34	1.70497e-209	Endothelial	Myct1
1.73928e-212	4.3703	0.785	0.525	3.47856e-209	Endothelial	Bmp4
9.19929e-210	4.93212	0.65	0.347	1.83986e-206	Endothelial	Spn
3.56211e-207	7.88117	0.717	0.467	7.12422e-204	Endothelial	Lsr
4.15234e-206	6.89676	0.748	0.499	8.30468e-203	Endothelial	Samd12
2.1653e-205	2.44194	0.744	0.198	4.33061e-202	Endothelial	Prtn3
2.54244e-205	1.68951	0.931	0.816	5.08487e-202	Endothelial	Anxa3
5.37509e-205	8.89412	0.653	0.345	1.07502e-201	Endothelial	Klk8
2.7546e-203	6.40498	0.732	0.529	5.5092e-200	Endothelial	Tspan13
1.10819e-202	9.8984	0.529	0.175	2.21638e-199	Endothelial	Gimap4
2.83531e-202	2.39653	0.811	0.489	5.67062e-199	Endothelial	Negr1
9.27222e-200	6.43559	0.488	0.217	1.85444e-196	Endothelial	Shisa9
2.66297e-196	7.45931	0.663	0.437	5.32594e-193	Endothelial	Nkx2-3
1.27781e-195	3.35151	0.801	0.533	2.55563e-192	Endothelial	Pitpnc1
3.1433e-195	3.05398	0.822	0.506	6.2866e-192	Endothelial	Rapgef5
1.1056e-192	4.24308	0.752	0.522	2.2112e-189	Endothelial	Ptgs1
1.43192e-192	6.50169	0.752	0.559	2.86385e-189	Endothelial	Nrg1
1.72233e-190	5.18449	0.775	0.518	3.44465e-187	Endothelial	Lrg1
5.07551e-190	2.71549	0.833	0.595	1.0151e-186	Endothelial	Slc43a3
1.79132e-189	3.98678	0.625	0.328	3.58265e-186	Endothelial	Barx2
4.36266e-189	6.05173	0.639	0.251	8.72533e-186	Endothelial	Kcnq1
1.23161e-187	9.10247	0.549	0.294	2.46323e-184	Endothelial	Lrrc3b
2.42027e-187	3.00755	0.784	0.326	4.84055e-184	Endothelial	Erc2
4.03721e-185	3.91724	0.727	0.44	8.07441e-182	Endothelial	Gm4841
7.37996e-184	4.83156	0.737	0.499	1.47599e-180	Endothelial	Tmem158
1.9673e-178	6.7624	0.572	0.142	3.93459e-175	Endothelial	Eya1
4.89609e-178	2.49169	0.882	0.707	9.79217e-175	Endothelial	Ndrg1
7.71372e-178	7.4026	0.696	0.437	1.54274e-174	Endothelial	Gata2
5.10682e-176	8.38524	0.618	0.18	1.02136e-172	Endothelial	Gbp4
6.75505e-175	2.18259	0.778	0.458	1.35101e-171	Endothelial	Catsper2
8.46497e-175	1.62764	0.935	0.838	1.69299e-171	Endothelial	Sulf1
8.83808e-175	7.63365	0.673	0.312	1.76762e-171	Endothelial	Tcf23
1.95042e-174	2.97627	0.818	0.622	3.90084e-171	Endothelial	Cpne8
1.21719e-173	6.67032	0.664	0.172	2.43439e-170	Endothelial	Gcnt1
7.41215e-173	2.06292	0.786	0.444	1.48243e-169	Endothelial	Gm29585
1.95338e-171	4.33375	0.737	0.575	3.90677e-168	Endothelial	Gbp6
3.55594e-167	6.65707	0.703	0.47	7.11187e-164	Endothelial	Enpp6
2.32431e-166	1.60413	0.962	0.877	4.64863e-163	Endothelial	Pde3a
3.33995e-166	7.6639	0.655	0.473	6.67989e-163	Endothelial	Myrip
1.91881e-165	1.83169	0.878	0.823	3.83762e-162	Endothelial	Efna5
4.40637e-165	3.20177	0.79	0.569	8.81274e-162	Endothelial	Clec2d
3.59032e-163	1.94503	0.081	0.296	7.18064e-160	Endothelial	Gm42884
4.03915e-163	9.421	0.659	0.325	8.07831e-160	Endothelial	Rasip1
6.22856e-162	9.51771	0.64	0.299	1.24571e-158	Endothelial	Pkn3
6.52434e-161	5.48845	0.706	0.499	1.30487e-157	Endothelial	Prkch
9.04392e-161	5.59671	0.705	0.405	1.80878e-157	Endothelial	Frmd5
6.61459e-160	3.03002	0.749	0.497	1.32292e-156	Endothelial	Bace2
2.5366e-156	1.87836	0.871	0.61	5.0732e-153	Endothelial	Abca1
7.46986e-156	1.72827	0.951	0.852	1.49397e-152	Endothelial	Cdh13
3.45983e-155	2.50605	0.751	0.456	6.91966e-152	Endothelial	Ccnd1
1.20367e-153	1.84785	0.782	0.502	2.40734e-150	Endothelial	Gda
3.32445e-152	8.75453	0.35	0.228	6.64889e-149	Endothelial	4930428N03Rik
1.01477e-149	4.33302	0.734	0.567	2.02954e-146	Endothelial	Thsd7a
1.3416e-149	1.87381	0.829	0.712	2.68319e-146	Endothelial	Tinagl1
1.40249e-149	2.27533	0.837	0.599	2.80498e-146	Endothelial	Phlda3
1.49443e-149	4.26274	0.699	0.417	2.98886e-146	Endothelial	Ttc9
2.30094e-148	3.60623	0.756	0.524	4.60188e-145	Endothelial	Plvap
4.30994e-147	4.33671	0.584	0.291	8.61989e-144	Endothelial	Olr1
8.20706e-146	5.34042	0.633	0.209	1.64141e-142	Endothelial	Nexmif
8.1599e-145	2.93974	0.467	0.261	1.63198e-141	Endothelial	Clec1b
1.1861e-144	2.51605	0.772	0.545	2.37219e-141	Endothelial	Stk10
3.87657e-144	2.14175	0.619	0.169	7.75314e-141	Endothelial	Rxrg
1.13824e-143	4.02185	0.703	0.522	2.27648e-140	Endothelial	Stxbp6
1.23202e-143	4.97245	0.724	0.503	2.46405e-140	Endothelial	Edn1
3.49941e-143	4.81936	0.687	0.542	6.99882e-140	Endothelial	Lcn2
5.41176e-141	8.7489	0.5	0.132	1.08235e-137	Endothelial	Stmn2
1.57739e-140	9.73434	0.438	0.365	3.15477e-137	Endothelial	Gpr182
2.4593e-139	8.26159	0.569	0.254	4.91861e-136	Endothelial	Tnfsf10
1.09188e-136	2.97237	0.757	0.499	2.18376e-133	Endothelial	Exoc6
2.73585e-136	1.74396	0.763	0.425	5.47171e-133	Endothelial	Hist1h2ae
4.95333e-132	1.55151	0.901	0.842	9.90667e-129	Endothelial	Mecom
3.12883e-131	2.11815	0.022	0.472	6.25767e-128	Endothelial	Elavl2
4.97209e-131	2.50615	0.87	0.627	9.94418e-128	Endothelial	Cdk8
5.33179e-131	3.35777	0.72	0.625	1.06636e-127	Endothelial	Icam1
1.71434e-128	2.42164	0.675	0.387	3.42868e-125	Endothelial	Wfdc3
3.88588e-128	1.58531	0.914	0.832	7.77176e-125	Endothelial	Tgm2
8.85403e-128	2.19418	0.761	0.668	1.77081e-124	Endothelial	Tmem176a
7.74489e-125	5.23519	0.669	0.452	1.54898e-121	Endothelial	Sema6a
1.44243e-124	2.12323	0.717	0.571	2.88486e-121	Endothelial	4933406I18Rik
6.64763e-123	4.67712	0.704	0.539	1.32953e-119	Endothelial	Rps6ka2
5.63935e-122	2.91402	0.741	0.583	1.12787e-118	Endothelial	Gria3
2.38226e-120	2.16303	0.762	0.577	4.76452e-117	Endothelial	Bst2
5.97569e-120	1.7834	0.855	0.626	1.19514e-116	Endothelial	Ninj1
7.31818e-120	2.72002	0.786	0.643	1.46364e-116	Endothelial	Plxna4
1.64697e-119	2.66791	0.729	0.538	3.29395e-116	Endothelial	Fyn
1.39389e-117	3.55274	0.604	0.289	2.78779e-114	Endothelial	Gdf6
2.13293e-115	2.30874	0.032	0.426	4.26585e-112	Endothelial	Pcnx2
5.64221e-115	2.26236	0.649	0.4	1.12844e-111	Endothelial	Ptpre
1.28412e-113	2.13224	0.746	0.565	2.56823e-110	Endothelial	Cyp1b1
3.42819e-113	1.55586	0.904	0.793	6.85638e-110	Endothelial	Crim1
6.7844e-113	4.47815	0.45	0.199	1.35688e-109	Endothelial	Cd247
1.84378e-112	1.64152	0.084	0.424	3.68756e-109	Endothelial	Ckmt1
1.88594e-112	3.0145	0.645	0.36	3.77188e-109	Endothelial	Grin3a
2.69875e-112	3.96164	0.026	0.41	5.3975e-109	Endothelial	Fgfbp1
3.77878e-112	1.95786	0.736	0.531	7.55756e-109	Endothelial	Ackr3
4.12354e-112	1.79255	0.901	0.687	8.24707e-109	Endothelial	Neat1
2.18932e-110	1.86069	0.725	0.507	4.37865e-107	Endothelial	P2rx7
7.5011e-110	1.54126	0.798	0.612	1.50022e-106	Endothelial	Thbd
2.26994e-109	2.64369	0.765	0.559	4.53987e-106	Endothelial	Etl4
4.16576e-109	2.27255	0.087	0.271	8.33152e-106	Endothelial	Upk3b
1.89156e-108	2.71842	0.712	0.566	3.78312e-105	Endothelial	Kctd12
5.37443e-106	2.26637	0.784	0.651	1.07489e-102	Endothelial	Ntn4
1.77152e-105	3.64396	0.64	0.607	3.54304e-102	Endothelial	AW112010
5.02222e-105	2.64966	0.732	0.531	1.00444e-101	Endothelial	Tbc1d4
6.90811e-104	2.41975	0.687	0.496	1.38162e-100	Endothelial	Zfp521
7.05033e-104	1.75862	0.728	0.597	1.41007e-100	Endothelial	Ly6a
8.44096e-104	3.22337	0.727	0.541	1.68819e-100	Endothelial	Fabp5
3.14677e-103	3.14063	0.812	0.64	6.29355e-100	Endothelial	Aqp1
3.84049e-103	2.22241	0.712	0.534	7.68098e-100	Endothelial	Efemp1
6.70607e-103	2.43696	0.774	0.594	1.34121e-99	Endothelial	Fbxl7
1.04923e-102	5.10986	0.633	0.335	2.09845e-99	Endothelial	Kirrel3
3.5035e-101	7.2003	0.611	0.486	7.007e-98	Endothelial	Clic5
4.87285e-100	5.04347	0.651	0.503	9.7457e-97	Endothelial	Gja4
1.42285e-99	2.96339	0.619	0.465	2.84571e-96	Endothelial	Zmynd15
2.46299e-99	5.18523	0.629	0.433	4.92598e-96	Endothelial	Apold1
1.13321e-98	4.07652	0.664	0.529	2.26642e-95	Endothelial	Lmo7
2.48748e-98	6.80799	0.589	0.414	4.97495e-95	Endothelial	Nrxn3
2.88125e-98	1.66512	0.683	0.373	5.7625e-95	Endothelial	Ror2
5.19539e-97	2.99597	0.659	0.361	1.03908e-93	Endothelial	Krt18
7.75574e-94	2.79188	0.64	0.537	1.55115e-90	Endothelial	Ly6c1
1.19131e-92	1.83383	0.677	0.512	2.38261e-89	Endothelial	Lrrc8d
4.05019e-91	1.97187	0.648	0.419	8.10038e-88	Endothelial	Nrg3
3.78365e-90	6.05026	0.59	0.532	7.5673e-87	Endothelial	Chrm3
8.24181e-90	3.90487	0.617	0.346	1.64836e-86	Endothelial	Dync1i1
4.11141e-89	5.72489	0.541	0.302	8.22282e-86	Endothelial	Krt7
8.91894e-89	1.76616	0.665	0.56	1.78379e-85	Endothelial	Smpd3
3.27014e-88	1.66383	0.768	0.727	6.54029e-85	Endothelial	Cp
4.97808e-88	1.80636	0.634	0.433	9.95617e-85	Endothelial	Lbp
7.58803e-86	3.09907	0.18	0.441	1.51761e-82	Endothelial	Gm35021
1.89132e-85	2.03157	0.629	0.383	3.78263e-82	Endothelial	Arhgap4
3.51281e-85	3.04991	0.062	0.389	7.02561e-82	Endothelial	Calcb
2.14231e-84	2.12811	0.586	0.24	4.28461e-81	Endothelial	Rasgrp3
7.48096e-83	1.9009	0.649	0.472	1.49619e-79	Endothelial	Tcf7
1.27279e-81	3.90633	0.649	0.474	2.54557e-78	Endothelial	Chn2
8.82112e-81	3.36551	0.675	0.637	1.76422e-77	Endothelial	Calcrl
1.61117e-80	9.05161	0.468	0.333	3.22235e-77	Endothelial	Ptprr
4.27847e-79	5.20939	0.65	0.375	8.55694e-76	Endothelial	Prox1
5.86627e-79	2.4262	0.697	0.432	1.17325e-75	Endothelial	Atp1b1
1.7843e-78	6.65132	0.576	0.514	3.56859e-75	Endothelial	Cadps2
3.65615e-77	5.22433	0.522	0.267	7.3123e-74	Endothelial	Gm20756
1.24079e-76	4.54961	0.546	0.37	2.48159e-73	Endothelial	Exoc3l2
3.76682e-76	6.21747	0.497	0.45	7.53364e-73	Endothelial	Upp1
6.87331e-76	2.00797	0.682	0.492	1.37466e-72	Endothelial	Ezr
1.70079e-75	4.10093	0.617	0.592	3.40159e-72	Endothelial	Unc45b
3.31295e-75	6.48059	0.526	0.364	6.62591e-72	Endothelial	D5Ertd615e
3.92092e-75	2.81141	0.68	0.521	7.84184e-72	Endothelial	March3
1.71416e-73	2.47856	0.704	0.596	3.42832e-70	Endothelial	Dock4
1.7217e-73	3.07653	0.628	0.4	3.4434e-70	Endothelial	Gm16685
2.19564e-73	3.14435	0.578	0.57	4.39129e-70	Endothelial	Cd40
5.95043e-73	2.08285	0.602	0.522	1.19009e-69	Endothelial	Gm15675
1.81523e-71	2.87779	0.658	0.517	3.63046e-68	Endothelial	Trerf1
5.96082e-71	2.39143	0.689	0.559	1.19216e-67	Endothelial	Fli1
1.07084e-70	3.27241	0.588	0.495	2.14168e-67	Endothelial	Shtn1
1.57718e-67	5.10091	0.576	0.541	3.15436e-64	Endothelial	Isl1
1.73435e-67	2.91735	0.627	0.533	3.46869e-64	Endothelial	Nhsl1
7.80914e-67	1.9397	0.527	0.323	1.56183e-63	Endothelial	Aldh1a3
1.14442e-66	2.2406	0.674	0.555	2.28885e-63	Endothelial	Kcnt2
5.1459e-66	1.50948	0.496	0.411	1.02918e-62	Endothelial	Inpp5d
6.83935e-66	1.91625	0.684	0.503	1.36787e-62	Endothelial	Tmem132d
2.04577e-65	3.79759	0.638	0.553	4.09154e-62	Endothelial	Fgf14
3.19197e-65	4.83359	0.588	0.478	6.38394e-62	Endothelial	Ephx2
3.82459e-65	1.89162	0.693	0.511	7.64918e-62	Endothelial	Tsc22d3
6.15856e-65	2.5427	0.472	0.174	1.23171e-61	Endothelial	Hbb-bs
8.07821e-65	3.2967	0.654	0.552	1.61564e-61	Endothelial	Iigp1
1.17367e-64	1.91295	0.762	0.586	2.34735e-61	Endothelial	Serpinb6b
1.20626e-63	2.77147	0.562	0.383	2.41252e-60	Endothelial	Smagp
3.79839e-63	2.94982	0.611	0.466	7.59679e-60	Endothelial	Cst6
2.88763e-62	2.67774	0.628	0.502	5.77525e-59	Endothelial	Pde3b
5.67886e-62	1.87699	0.702	0.565	1.13577e-58	Endothelial	Col4a3
9.16072e-62	2.52286	0.589	0.522	1.83214e-58	Endothelial	Pcdh19
3.44955e-60	3.10246	0.57	0.482	6.8991e-57	Endothelial	Hmcn1
5.03994e-57	5.68406	0.665	0.314	1.00799e-53	Endothelial	Htr2b
3.85737e-56	4.7081	0.545	0.472	7.71473e-53	Endothelial	Camk4
4.23429e-55	2.53227	0.109	0.278	8.46859e-52	Endothelial	Gm47889
8.4308e-55	6.91776	0.39	0.233	1.68616e-51	Endothelial	Tll1
5.91605e-54	2.68202	0.524	0.423	1.18321e-50	Endothelial	Pak7
1.21074e-53	6.95183	0.375	0.384	2.42148e-50	Endothelial	Sele
1.54904e-53	1.9458	0.636	0.575	3.09807e-50	Endothelial	Arhgdib
3.61538e-53	1.78012	0.617	0.408	7.23076e-50	Endothelial	2810403D21Rik
5.01324e-53	2.57281	0.616	0.585	1.00265e-49	Endothelial	Oasl2
6.84474e-52	4.1773	0.526	0.417	1.36895e-48	Endothelial	Epha5
2.08908e-51	2.81392	0.597	0.541	4.17817e-48	Endothelial	Trim30a
6.90727e-51	2.98056	0.563	0.532	1.38145e-47	Endothelial	Gm16083
9.05096e-51	1.86804	0.625	0.502	1.81019e-47	Endothelial	Cxcl16
1.35655e-50	8.62313	0.457	0.237	2.7131e-47	Endothelial	Megf6
2.14532e-50	2.87976	0.53	0.417	4.29063e-47	Endothelial	Dlx6
9.97826e-50	1.7446	0.683	0.644	1.99565e-46	Endothelial	Col4a4
1.47421e-49	3.56582	0.558	0.474	2.94843e-46	Endothelial	Pthlh
2.60839e-49	2.52514	0.592	0.496	5.21677e-46	Endothelial	Psmb8
4.00243e-49	2.75201	0.633	0.561	8.00487e-46	Endothelial	Gbp7
5.9396e-49	2.30826	0.59	0.625	1.18792e-45	Endothelial	Eps8
1.58679e-48	1.60021	0.565	0.415	3.17358e-45	Endothelial	Mndal
2.59271e-48	2.85131	0.589	0.48	5.18543e-45	Endothelial	4931414P19Rik
2.98928e-48	3.55088	0.578	0.503	5.97855e-45	Endothelial	Igtp
7.80547e-48	6.92188	0.34	0.206	1.56109e-44	Endothelial	Dkk2
1.02047e-47	1.56845	0.63	0.518	2.04095e-44	Endothelial	Arhgap26
1.32254e-47	2.57175	0.546	0.427	2.64508e-44	Endothelial	Slfn5
2.16697e-47	6.33657	0.409	0.315	4.33393e-44	Endothelial	Hoxb9
3.58532e-47	1.66225	0.594	0.469	7.17065e-44	Endothelial	Vsir
4.01308e-47	2.60918	0.531	0.407	8.02616e-44	Endothelial	Coch
1.22279e-46	5.16191	0.511	0.396	2.44558e-43	Endothelial	Vipr1
3.23387e-46	6.84969	0.451	0.303	6.46775e-43	Endothelial	Nt5e
3.45003e-46	3.40079	0.503	0.286	6.90006e-43	Endothelial	Rtn1
7.88595e-46	3.73854	0.598	0.621	1.57719e-42	Endothelial	Thbs1
2.58568e-44	3.78645	0.561	0.431	5.17136e-41	Endothelial	Gngt2
1.28442e-43	6.66045	0.454	0.369	2.56884e-40	Endothelial	Clca3a1
1.38761e-43	5.44773	0.471	0.466	2.77523e-40	Endothelial	Kdr
2.55168e-40	1.89517	0.533	0.375	5.10336e-37	Endothelial	Fndc1
1.12478e-38	1.52886	0.635	0.563	2.24956e-35	Endothelial	Man1a
3.08492e-38	8.3528	0.351	0.337	6.16984e-35	Endothelial	Cyyr1
3.15621e-38	3.17662	0.575	0.524	6.31241e-35	Endothelial	Gpm6a
7.03273e-38	3.75498	0.483	0.473	1.40655e-34	Endothelial	Cthrc1
7.00149e-37	2.17182	0.661	0.586	1.4003e-33	Endothelial	Gbp2
1.21532e-36	5.08109	0.479	0.409	2.43063e-33	Endothelial	Gsg1
1.4726e-36	2.54397	0.209	0.51	2.94521e-33	Endothelial	Gsta4
2.05861e-36	2.4041	0.581	0.445	4.11722e-33	Endothelial	Fbxo47
9.59776e-36	1.88967	0.082	0.271	1.91955e-32	Endothelial	Cd2
2.24473e-35	1.87692	0.409	0.315	4.48946e-32	Endothelial	Cd38
4.21131e-34	2.97378	0.524	0.479	8.42263e-31	Endothelial	Aldh3a1
6.35035e-34	2.29992	0.569	0.475	1.27007e-30	Endothelial	Fzd4
7.75609e-34	7.30829	0.42	0.306	1.55122e-30	Endothelial	Rbp7
1.32522e-33	1.57163	0.58	0.628	2.65043e-30	Endothelial	Cd55
1.39405e-32	3.0286	0.491	0.333	2.78809e-29	Endothelial	Pdgfb
1.43242e-32	1.79949	0.634	0.572	2.86485e-29	Endothelial	Stmn1
2.87451e-32	2.58561	0.547	0.438	5.74901e-29	Endothelial	Abcg1
3.00244e-32	2.82978	0.423	0.322	6.00488e-29	Endothelial	Gm12758
1.62478e-31	3.33132	0.5	0.508	3.24956e-28	Endothelial	F830016B08Rik
2.83159e-31	1.60137	0.486	0.284	5.66317e-28	Endothelial	Meox1
4.41596e-31	1.68915	0.161	0.489	8.83191e-28	Endothelial	Fam155a
5.83455e-31	1.68068	0.541	0.469	1.16691e-27	Endothelial	G0s2
1.9714e-30	7.00528	0.45	0.329	3.9428e-27	Endothelial	Cldn15
1.13933e-29	1.53426	0.698	0.646	2.27866e-26	Endothelial	Ghr
1.56018e-29	5.21696	0.678	0.399	3.12036e-26	Endothelial	Reln
8.46532e-27	2.05767	0.2	0.268	1.69306e-23	Endothelial	Hba-a1
8.62532e-27	2.06825	0.179	0.302	1.72506e-23	Endothelial	4933439K11Rik
1.78433e-25	1.98458	0.441	0.508	3.56866e-22	Endothelial	Rsad2
5.46575e-25	3.54975	0.419	0.477	1.09315e-21	Endothelial	Ppp2r2b
7.46682e-25	4.06751	0.514	0.472	1.49336e-21	Endothelial	Ecrg4
1.37814e-24	5.07139	0.443	0.34	2.75627e-21	Endothelial	Mt3
3.53037e-24	5.03428	0.498	0.452	7.06074e-21	Endothelial	Myzap
4.50713e-24	1.68256	0.487	0.407	9.01425e-21	Endothelial	Pmaip1
1.11851e-23	4.93227	0.45	0.453	2.23701e-20	Endothelial	Stmn3
1.289e-23	1.97811	0.629	0.618	2.57801e-20	Endothelial	Ptprk
1.65198e-23	3.62003	0.474	0.336	3.30395e-20	Endothelial	Ahsg
1.86478e-23	2.6186	0.528	0.411	3.72957e-20	Endothelial	Gm45184
9.31716e-23	1.83009	0.395	0.25	1.86343e-19	Endothelial	Ctla2b
1.05589e-21	1.94125	0.576	0.532	2.11178e-18	Endothelial	Slc4a4
1.41556e-21	1.82962	0.556	0.531	2.83111e-18	Endothelial	Rasgef1b
5.09161e-21	3.12628	0.496	0.567	1.01832e-17	Endothelial	Kcnc2
9.66998e-20	1.75949	0.566	0.504	1.934e-16	Endothelial	Cx3cl1
1.09967e-18	2.57686	0.471	0.448	2.19934e-15	Endothelial	Gm4951
2.16003e-18	3.55185	0.389	0.372	4.32005e-15	Endothelial	Hydin
1.3055e-15	1.64902	0.59	0.544	2.611e-12	Endothelial	Prex2
8.10062e-14	3.93225	0.388	0.356	1.62012e-10	Endothelial	Cenpf
6.32046e-13	1.9297	0.569	0.425	1.26409e-09	Endothelial	Syngr1
4.06478e-12	1.7202	0.519	0.498	8.12956e-09	Endothelial	Gm11290
7.39702e-12	2.41106	0.509	0.485	1.4794e-08	Endothelial	Serpinb1a
1.79877e-11	2.29622	0.47	0.588	3.59755e-08	Endothelial	Traf1
2.14691e-11	1.65412	0.464	0.476	4.29381e-08	Endothelial	Ptchd1
2.3675e-11	1.6461	0.529	0.506	4.735e-08	Endothelial	Irf7
3.68406e-11	2.39634	0.35	0.343	7.36812e-08	Endothelial	1600002D24Rik
4.77346e-11	1.7038	0.44	0.465	9.54693e-08	Endothelial	Gpsm3
9.57673e-11	2.65468	0.502	0.517	1.91535e-07	Endothelial	Ednrb
1.16618e-10	3.49679	0.219	0.383	2.33235e-07	Endothelial	Pglyrp1
1.19504e-10	1.55029	0.489	0.538	2.39009e-07	Endothelial	Fxyd6
1.93757e-10	4.10905	0.451	0.514	3.87515e-07	Endothelial	Tubb3
2.02068e-10	1.85829	0.52	0.533	4.04136e-07	Endothelial	Lrmda
3.65178e-10	2.03683	0.285	0.357	7.30356e-07	Endothelial	Ndc80
3.4836e-09	1.67282	0.563	0.511	6.96719e-06	Endothelial	Glis3
7.39281e-09	4.40518	0.427	0.415	1.47856e-05	Endothelial	Hs3st1
2.87226e-08	2.17227	0.598	0.476	5.74453e-05	Endothelial	Stc1
3.39634e-08	2.22245	0.441	0.484	6.79268e-05	Endothelial	Slc25a21
9.52816e-08	1.72902	0.47	0.42	0.000190563	Endothelial	Adam2
2.01657e-07	2.02969	0.486	0.457	0.000403313	Endothelial	Ifit3
2.06588e-07	2.87116	0.401	0.407	0.000413177	Endothelial	Nova1
4.04471e-07	1.62695	0.217	0.286	0.000808942	Endothelial	A230005M16Rik
1.42461e-06	1.87993	0.197	0.339	0.00284923	Endothelial	Knl1
1.6663e-05	1.93859	0.435	0.5	0.0333261	Endothelial	Angpt1
2.65589e-05	1.73419	0.399	0.509	0.0531177	Endothelial	Cdkn3
3.08868e-05	1.61567	0.255	0.59	0.0617737	Endothelial	Chrm2
5.99124e-05	1.79099	0.394	0.293	0.119825	Endothelial	Gm2115
6.5701e-05	1.93447	0.553	0.427	0.131402	Endothelial	Cxcl10
9.505e-05	3.05494	0.386	0.4	0.1901	Endothelial	Dlx6os1
9.82348e-05	2.59297	0.391	0.425	0.19647	Endothelial	L1td1
0.000184795	2.21478	0.381	0.24	0.36959	Endothelial	Ikzf3
0.000188607	1.52515	0.353	0.452	0.377215	Endothelial	Sgcz
[truncated: 341 more rows]

## Sheet: STZ_9wk_Leuko_Recluster
p_val	avg_log2FC	pct.1	pct.2	p_val_adj	cluster	gene
2.06279e-175	3.17948	0.992	0.375	4.30794e-171	ResidentMacs	F13a1
2.57498e-156	2.53689	0.987	0.48	5.37758e-152	ResidentMacs	Mrc1
3.6936e-150	2.22855	0.998	0.523	7.71371e-146	ResidentMacs	Pf4
1.04991e-144	2.42183	0.979	0.475	2.19262e-140	ResidentMacs	Maf
1.90047e-144	2.00053	0.998	0.766	3.96893e-140	ResidentMacs	Selenop
6.85983e-139	2.48863	0.959	0.38	1.43261e-134	ResidentMacs	Cbr2
3.78388e-129	2.85206	0.905	0.257	7.90226e-125	ResidentMacs	Folr2
3.60726e-123	2.02109	0.972	0.593	7.5334e-119	ResidentMacs	Dab2
9.18409e-119	1.6052	0.986	0.73	1.91801e-114	ResidentMacs	Csf1r
4.3557e-116	3.64556	0.815	0.184	9.09644e-112	ResidentMacs	Lyve1
7.02352e-116	2.3734	0.933	0.532	1.46679e-111	ResidentMacs	Mctp1
3.17276e-113	2.19336	0.934	0.518	6.626e-109	ResidentMacs	Ninj1
8.95709e-109	2.13232	0.922	0.511	1.8706e-104	ResidentMacs	Slc9a9
2.95051e-106	2.05609	0.919	0.552	6.16185e-102	ResidentMacs	Fcgrt
6.00964e-106	1.64675	0.973	0.714	1.25505e-101	ResidentMacs	Trf
5.78822e-105	2.00215	0.963	0.709	1.20881e-100	ResidentMacs	Rbpj
6.76758e-104	2.13092	0.914	0.409	1.41334e-99	ResidentMacs	Stab1
1.24317e-102	2.29995	0.859	0.345	2.59624e-98	ResidentMacs	Wwp1
2.62068e-99	3.09596	0.79	0.227	5.47304e-95	ResidentMacs	Cd163
5.99529e-96	2.31208	0.854	0.37	1.25206e-91	ResidentMacs	Psd3
6.9682e-93	2.44473	0.813	0.27	1.45524e-88	ResidentMacs	Ltc4s
2.03101e-88	1.5826	0.925	0.475	4.24156e-84	ResidentMacs	Cfh
1.66221e-86	1.91382	0.848	0.357	3.47137e-82	ResidentMacs	Gas6
2.80382e-84	3.06921	0.722	0.168	5.8555e-80	ResidentMacs	Ccl24
9.50598e-82	1.58151	0.911	0.611	1.98523e-77	ResidentMacs	Cltc
8.40114e-78	2.78857	0.723	0.214	1.75449e-73	ResidentMacs	Fxyd2
1.89204e-77	1.9049	0.851	0.489	3.95133e-73	ResidentMacs	Frmd4b
2.08934e-77	1.75145	0.864	0.464	4.36337e-73	ResidentMacs	Ms4a6b
2.41747e-77	1.55632	0.906	0.584	5.04864e-73	ResidentMacs	Blvrb
1.36461e-75	1.54663	0.914	0.527	2.84985e-71	ResidentMacs	Pltp
2.08365e-66	1.78896	0.813	0.464	4.3515e-62	ResidentMacs	Tmcc1
8.12681e-66	2.44559	0.672	0.223	1.6972e-61	ResidentMacs	Ophn1
1.15001e-64	2.73919	0.645	0.22	2.40168e-60	ResidentMacs	Stard8
1.39309e-62	1.8706	0.771	0.359	2.90932e-58	ResidentMacs	Hpgd
4.32236e-62	1.53247	0.815	0.384	9.02681e-58	ResidentMacs	Fcrls
1.98346e-61	1.79421	0.77	0.455	4.14227e-57	ResidentMacs	Ap2a2
1.49298e-58	2.18763	0.667	0.257	3.11794e-54	ResidentMacs	Itsn1
5.43716e-57	1.81331	0.726	0.334	1.1355e-52	ResidentMacs	Rnase4
7.37397e-57	1.84321	0.728	0.377	1.53998e-52	ResidentMacs	Myo5a
8.56538e-57	1.80735	0.734	0.366	1.78879e-52	ResidentMacs	Cd36
3.98629e-56	1.64414	0.757	0.414	8.32498e-52	ResidentMacs	Snx2
1.64983e-55	1.52053	0.773	0.427	3.4455e-51	ResidentMacs	Glul
2.75151e-55	1.88631	0.711	0.336	5.74625e-51	ResidentMacs	Srgap2
2.49921e-54	2.00746	0.677	0.305	5.21934e-50	ResidentMacs	Tcn2
3.09208e-54	1.78814	0.636	0.223	6.45749e-50	ResidentMacs	Ctla2b
6.82634e-53	2.01519	0.666	0.264	1.42561e-48	ResidentMacs	Slco2b1
8.27669e-53	1.56288	0.778	0.43	1.7285e-48	ResidentMacs	Pmp22
1.51224e-50	2.0764	0.653	0.291	3.15817e-46	ResidentMacs	Nrp1
8.82096e-49	2.21185	0.593	0.202	1.84217e-44	ResidentMacs	Bank1
1.02928e-48	2.71187	0.517	0.116	2.14956e-44	ResidentMacs	C4b
4.79897e-48	2.18013	0.608	0.257	1.00222e-43	ResidentMacs	Lifr
1.58071e-47	1.70114	0.705	0.382	3.30115e-43	ResidentMacs	Rnf150
2.89628e-46	1.97409	0.619	0.255	6.0486e-42	ResidentMacs	Abca9
3.41732e-46	1.64459	0.689	0.366	7.13672e-42	ResidentMacs	Hacd4
1.57408e-44	1.91935	0.622	0.257	3.2873e-40	ResidentMacs	Agmo
8.48948e-44	1.67817	0.649	0.311	1.77294e-39	ResidentMacs	Smagp
1.24683e-43	1.92804	0.632	0.309	2.60388e-39	ResidentMacs	Zdhhc14
3.93125e-43	1.50178	0.729	0.43	8.21001e-39	ResidentMacs	Zswim6
4.97406e-42	3.16889	0.462	0.102	1.03878e-37	ResidentMacs	Fcna
4.38296e-41	1.78072	0.622	0.327	9.15338e-37	ResidentMacs	Eps15
7.03583e-41	3.41233	0.429	0.095	1.46936e-36	ResidentMacs	Plekhg5
1.51521e-40	1.85906	0.654	0.348	3.16436e-36	ResidentMacs	Immp2l
3.02358e-39	2.2178	0.494	0.157	6.31445e-35	ResidentMacs	Etv1
3.08704e-37	1.73774	0.607	0.27	6.44697e-33	ResidentMacs	Mir99ahg
5.72515e-37	1.98352	0.532	0.202	1.19564e-32	ResidentMacs	Gpr34
1.4555e-36	1.86476	0.547	0.239	3.03966e-32	ResidentMacs	Man1c1
3.96906e-36	1.82637	0.6	0.341	8.28898e-32	ResidentMacs	Mtss1
4.95119e-36	1.91107	0.548	0.255	1.03401e-31	ResidentMacs	Ap1b1
8.56442e-35	1.90929	0.538	0.23	1.78859e-30	ResidentMacs	Dse
1.43956e-34	2.17122	0.507	0.198	3.00639e-30	ResidentMacs	Prkn
3.43689e-33	1.71231	0.574	0.273	7.17761e-29	ResidentMacs	Mertk
4.42765e-33	1.55826	0.595	0.339	9.24671e-29	ResidentMacs	Pepd
4.81038e-33	1.64633	0.577	0.293	1.0046e-28	ResidentMacs	Sbf2
4.23055e-32	1.50178	0.649	0.395	8.83509e-28	ResidentMacs	Hdac9
1.98206e-30	1.55733	0.524	0.236	4.13933e-26	ResidentMacs	Sult1a1
4.35454e-30	1.76361	0.501	0.218	9.09401e-26	ResidentMacs	Lrp6
6.26027e-30	2.5914	0.334	0.061	1.30739e-25	ResidentMacs	Chp2
1.87729e-29	1.51215	0.608	0.364	3.92053e-25	ResidentMacs	Man2a1
2.2461e-29	1.98262	0.488	0.189	4.69076e-25	ResidentMacs	Ccl7
5.33613e-29	2.26062	0.467	0.2	1.1144e-24	ResidentMacs	Clec10a
1.3967e-28	2.59011	0.376	0.105	2.91687e-24	ResidentMacs	Cp
1.93477e-28	1.57512	0.505	0.227	4.04058e-24	ResidentMacs	Aoah
2.53477e-28	1.70789	0.507	0.234	5.29362e-24	ResidentMacs	Rgl1
7.24777e-28	2.79314	0.347	0.082	1.51362e-23	ResidentMacs	Gm4951
1.29809e-27	1.85623	0.456	0.191	2.71093e-23	ResidentMacs	Msr1
2.73479e-27	2.00036	0.414	0.145	5.71133e-23	ResidentMacs	Rab11fip5
2.80577e-27	2.06703	0.465	0.216	5.85957e-23	ResidentMacs	Fkbp5
7.54629e-27	1.87996	0.454	0.184	1.57597e-22	ResidentMacs	Adap2
1.34855e-26	1.81189	0.409	0.139	2.81631e-22	ResidentMacs	Alox5
3.91665e-26	2.08239	0.386	0.125	8.17952e-22	ResidentMacs	Ang
4.17675e-26	1.50481	0.495	0.223	8.72273e-22	ResidentMacs	Tlr7
1.72775e-25	1.66511	0.47	0.223	3.60822e-21	ResidentMacs	Tnfaip8l2
5.04921e-25	1.62182	0.474	0.225	1.05448e-20	ResidentMacs	Snx8
5.24238e-25	1.95707	0.401	0.155	1.09482e-20	ResidentMacs	Clcn5
5.29122e-25	2.09835	0.462	0.216	1.10502e-20	ResidentMacs	Colec12
6.47763e-25	3.61925	0.27	0.039	1.35279e-20	ResidentMacs	Vsig4
1.13281e-24	2.29587	0.345	0.1	2.36576e-20	ResidentMacs	Reps2
2.91874e-24	1.64074	0.507	0.28	6.09549e-20	ResidentMacs	Arhgef3
3.43679e-24	2.37184	0.363	0.123	7.1774e-20	ResidentMacs	5033421B08Rik
1.06838e-23	2.14766	0.322	0.082	2.23121e-19	ResidentMacs	Cmah
1.67298e-23	1.59058	0.48	0.245	3.49384e-19	ResidentMacs	Mpp1
3.42221e-23	3.06108	0.298	0.073	7.14695e-19	ResidentMacs	Siglech
5.1346e-23	1.55059	0.486	0.257	1.07231e-18	ResidentMacs	Ctnnd1
8.03391e-23	1.53642	0.496	0.275	1.6778e-18	ResidentMacs	March1
8.91951e-23	1.96589	0.36	0.12	1.86275e-18	ResidentMacs	P2ry12
9.69637e-23	1.55061	0.485	0.255	2.02499e-18	ResidentMacs	Rab3il1
2.55578e-22	3.23584	0.268	0.052	5.3375e-18	ResidentMacs	Pla2g2d
2.9209e-22	2.04266	0.409	0.182	6.1e-18	ResidentMacs	P2rx7
3.2438e-22	2.44877	0.324	0.1	6.77435e-18	ResidentMacs	2610203C22Rik
9.48557e-22	1.55811	0.487	0.266	1.98097e-17	ResidentMacs	Enox2
9.79081e-22	2.3222	0.324	0.1	2.04471e-17	ResidentMacs	Serpinb8
1.4261e-21	2.50433	0.317	0.098	2.97826e-17	ResidentMacs	Rnasel
1.9597e-21	2.10574	0.343	0.116	4.09263e-17	ResidentMacs	Timd4
7.04639e-21	2.29105	0.291	0.075	1.47157e-16	ResidentMacs	Ccl8
1.73475e-20	1.93326	0.378	0.161	3.62285e-16	ResidentMacs	Prxl2b
2.12331e-20	1.61621	0.416	0.184	4.43432e-16	ResidentMacs	Dok2
3.28717e-20	1.52034	0.419	0.198	6.86493e-16	ResidentMacs	Sema4a
3.90293e-20	1.78539	0.385	0.17	8.15088e-16	ResidentMacs	Sgpp1
3.99374e-20	2.14523	0.349	0.134	8.34052e-16	ResidentMacs	Fhit
6.04151e-20	1.57992	0.477	0.289	1.26171e-15	ResidentMacs	Sulf2
1.02375e-19	2.37512	0.302	0.1	2.13799e-15	ResidentMacs	Pdgfc
1.39741e-19	2.29616	0.309	0.1	2.91834e-15	ResidentMacs	Egfr
1.82139e-19	2.04142	0.342	0.139	3.8038e-15	ResidentMacs	Selenbp1
2.37473e-19	2.55221	0.286	0.086	4.95938e-15	ResidentMacs	Etv5
3.99229e-19	1.58766	0.309	0.093	8.33749e-15	ResidentMacs	S1pr1
5.21168e-19	2.26031	0.321	0.12	1.08841e-14	ResidentMacs	Fer
1.70052e-18	2.13163	0.307	0.105	3.55137e-14	ResidentMacs	Prune2
1.70346e-18	1.82698	0.355	0.152	3.5575e-14	ResidentMacs	Cd38
3.43292e-18	1.64354	0.355	0.152	7.16932e-14	ResidentMacs	Grap
3.71939e-18	2.20303	0.295	0.1	7.76758e-14	ResidentMacs	Pik3cg
6.71199e-18	1.67301	0.344	0.139	1.40173e-13	ResidentMacs	Cmklr1
7.17259e-18	1.58032	0.36	0.15	1.49792e-13	ResidentMacs	Rassf2
7.78519e-18	2.53285	0.279	0.089	1.62586e-13	ResidentMacs	Nrg2
1.50237e-17	2.25289	0.293	0.102	3.13755e-13	ResidentMacs	Tmod1
2.18103e-17	1.6522	0.371	0.177	4.55486e-13	ResidentMacs	Rnf169
2.41099e-17	1.7282	0.363	0.164	5.0351e-13	ResidentMacs	Nrp2
4.69927e-17	2.31211	0.256	0.07	9.81395e-13	ResidentMacs	Rasgrp3
2.05055e-15	1.79372	0.383	0.202	4.28236e-11	ResidentMacs	Rad51b
3.14252e-15	1.64519	0.335	0.155	6.56284e-11	ResidentMacs	Kitl
3.36334e-15	1.63647	0.342	0.161	7.02401e-11	ResidentMacs	Gm15726
8.90893e-15	2.02254	0.263	0.095	1.86054e-10	ResidentMacs	Dusp6
2.23456e-14	1.88126	0.261	0.095	4.66666e-10	ResidentMacs	Trpv4
2.40627e-14	2.01096	0.272	0.105	5.02526e-10	ResidentMacs	Slc15a2
2.67881e-14	1.62984	0.293	0.125	5.59443e-10	ResidentMacs	Il4ra
5.27368e-14	1.7151	0.264	0.1	1.10136e-09	ResidentMacs	Mill2
3.21248e-13	2.05449	0.25	0.093	6.70895e-09	ResidentMacs	Ppp1r9a
5.88562e-13	1.50456	0.359	0.205	1.22915e-08	ResidentMacs	Tnfrsf11a
1.04438e-12	1.7566	0.279	0.127	2.18109e-08	ResidentMacs	Nfxl1
1.38822e-12	1.53054	0.284	0.127	2.89916e-08	ResidentMacs	Nfatc2
2.42401e-12	1.79573	0.252	0.102	5.06231e-08	ResidentMacs	Frmd8os
8.88005e-12	1.69372	0.298	0.152	1.85451e-07	ResidentMacs	Nhsl2
1.70137e-11	1.8623	0.254	0.111	3.55314e-07	ResidentMacs	Adam33
8.25221e-11	1.67812	0.28	0.145	1.72339e-06	ResidentMacs	Adcy9
1.15164e-10	1.61695	0.298	0.166	2.40508e-06	ResidentMacs	Trmt1
7.8861e-10	1.67688	0.26	0.134	1.64693e-05	ResidentMacs	Deptor
2.16163e-09	1.50959	0.258	0.136	4.51435e-05	ResidentMacs	Agpat3
2.33299e-09	1.6934	0.254	0.134	4.87222e-05	ResidentMacs	Sept8
2.51711e-229	14.8378	0.667	0	5.25674e-225	ILC2	Calca
2.51711e-229	14.612	0.667	0	5.25674e-225	ILC2	Il5
2.51711e-229	14.3949	0.667	0	5.25674e-225	ILC2	Dach2
2.51711e-229	12.9972	0.667	0	5.25674e-225	ILC2	Ccr4
1.42098e-153	11.3295	0.667	0.001	2.96757e-149	ILC2	Gata3
3.46081e-153	9.23257	0.667	0.001	7.22756e-149	ILC2	Itk
2.55114e-129	7.57331	1	0.003	5.3278e-125	ILC2	St6galnac3
3.26451e-116	10.02	1	0.004	6.8176e-112	ILC2	Skap1
1.11373e-115	11.1327	0.667	0.001	2.32592e-111	ILC2	Kcnd2
1.55371e-115	10.7375	0.333	0	3.24477e-111	ILC2	Hemgn
1.55371e-115	11.3684	0.333	0	3.24477e-111	ILC2	Gm12536
1.55371e-115	11.8754	0.333	0	3.24477e-111	ILC2	Il17re
1.55371e-115	11.3684	0.333	0	3.24477e-111	ILC2	Ccl1
1.55371e-115	10.7375	0.333	0	3.24477e-111	ILC2	Esr2
1.55371e-115	10.7375	0.333	0	3.24477e-111	ILC2	B930095G15Rik
1.55371e-115	11.3684	0.333	0	3.24477e-111	ILC2	Ccdc184
1.55371e-115	10.7375	0.333	0	3.24477e-111	ILC2	Frs3
1.55371e-115	10.7375	0.333	0	3.24477e-111	ILC2	1700072G22Rik
1.55371e-115	10.7375	0.333	0	3.24477e-111	ILC2	Gm16214
1.55371e-115	10.7375	0.333	0	3.24477e-111	ILC2	Igsf5
6.82697e-104	6.40559	1	0.004	1.42574e-99	ILC2	Trbc2
8.13566e-93	9.22787	0.667	0.002	1.69905e-88	ILC2	Neb
2.27178e-87	8.3983	1	0.006	4.74438e-83	ILC2	Ikzf3
9.44e-67	8.44344	0.667	0.003	1.97145e-62	ILC2	Tox
1.72525e-66	9.78639	1	0.008	3.60302e-62	ILC2	Tnfrsf18
1.33507e-58	10.6662	0.333	0.001	2.78817e-54	ILC2	Rorc
1.33507e-58	9.74793	0.333	0.001	2.78817e-54	ILC2	Hsf4
1.33507e-58	10.1722	0.333	0.001	2.78817e-54	ILC2	Lif
1.33507e-58	9.18875	0.333	0.001	2.78817e-54	ILC2	Gm41414
1.33507e-58	10.6972	0.333	0.001	2.78817e-54	ILC2	Cd6
1.33507e-58	9.224	0.333	0.001	2.78817e-54	ILC2	Foxp3
1.86442e-58	8.87994	0.333	0.001	3.89365e-54	ILC2	Cxcr6
4.91454e-47	7.46774	0.667	0.005	1.02635e-42	ILC2	Abcb1a
3.08812e-43	8.40409	0.667	0.006	6.44922e-39	ILC2	Tnfrsf10b
1.384e-39	8.71935	0.333	0.001	2.89035e-35	ILC2	Gm16701.1
1.384e-39	9.61409	0.333	0.001	2.89035e-35	ILC2	Gm17055
1.384e-39	9.43446	0.333	0.001	2.89035e-35	ILC2	B430218F22Rik
1.384e-39	8.91316	0.333	0.001	2.89035e-35	ILC2	Gm17767
1.384e-39	8.72049	0.333	0.001	2.89035e-35	ILC2	Gimap3
1.55159e-39	7.12236	0.667	0.006	3.24033e-35	ILC2	Rab27b
1.72962e-39	8.51001	0.333	0.001	3.61213e-35	ILC2	Bcl11b
1.72962e-39	7.81254	0.333	0.001	3.61213e-35	ILC2	Slain1
1.94001e-39	7.45908	0.667	0.006	4.05152e-35	ILC2	Ptprcap
5.76134e-34	7.03642	0.667	0.008	1.2032e-29	ILC2	Il2ra
4.64716e-30	9.70662	0.333	0.002	9.70512e-26	ILC2	Msh4
4.64716e-30	9.2925	0.333	0.002	9.70512e-26	ILC2	Prkcz
4.64716e-30	8.3645	0.333	0.002	9.70512e-26	ILC2	Tex15
4.64716e-30	9.56348	0.333	0.002	9.70512e-26	ILC2	Epop
4.64716e-30	8.47737	0.333	0.002	9.70512e-26	ILC2	Elovl7
5.49398e-30	8.11366	0.333	0.002	1.14736e-25	ILC2	Nmnat2
5.49398e-30	7.94121	0.333	0.002	1.14736e-25	ILC2	4930558K02Rik
5.49398e-30	7.11614	0.333	0.002	1.14736e-25	ILC2	Ffar2
5.93192e-30	7.08892	1	0.022	1.23882e-25	ILC2	Stat4
1.65344e-28	7.40657	0.667	0.01	3.45304e-24	ILC2	Klk8
2.45724e-28	8.79368	0.667	0.01	5.13171e-24	ILC2	Il18r1
1.6253e-26	6.5119	1	0.025	3.39427e-22	ILC2	Cd69
2.47528e-24	8.51163	0.333	0.003	5.16938e-20	ILC2	Gm13402
2.47528e-24	8.06508	0.333	0.003	5.16938e-20	ILC2	Gm43445
2.47528e-24	8.3935	0.333	0.003	5.16938e-20	ILC2	Raver2
2.47528e-24	8.5587	0.333	0.003	5.16938e-20	ILC2	Gm10563
2.47528e-24	8.20024	0.333	0.003	5.16938e-20	ILC2	Il27ra
2.83045e-24	7.38776	0.333	0.003	5.91111e-20	ILC2	Il2rb
2.83045e-24	7.72238	0.333	0.003	5.91111e-20	ILC2	Mlana
3.23603e-24	7.12878	0.333	0.003	6.75813e-20	ILC2	Lat
3.23603e-24	6.95322	0.333	0.003	6.75813e-20	ILC2	Kcnip1
3.6991e-24	6.45066	0.333	0.003	7.72521e-20	ILC2	Cd3e
4.22773e-24	6.03188	0.333	0.003	8.82919e-20	ILC2	Cd3g
2.17381e-23	7.36649	0.667	0.012	4.53979e-19	ILC2	Ramp3
2.88908e-22	8.942	0.667	0.013	6.03354e-18	ILC2	Cd27
1.51513e-21	7.59664	0.667	0.013	3.16419e-17	ILC2	Nck2
1.60719e-21	7.0026	0.667	0.013	3.35645e-17	ILC2	Gm48678
1.65349e-20	8.65145	0.333	0.003	3.45314e-16	ILC2	Gm17056
1.65349e-20	7.85607	0.333	0.003	3.45314e-16	ILC2	Gm9750
1.8492e-20	7.38085	0.333	0.003	3.86188e-16	ILC2	Il4
1.8492e-20	7.60489	0.333	0.003	3.86188e-16	ILC2	Pacsin1
1.8492e-20	7.96617	0.333	0.003	3.86188e-16	ILC2	Tespa1
7.04753e-20	6.98607	0.667	0.015	1.47181e-15	ILC2	Rnf128
1.29833e-19	5.73502	1	0.035	2.71144e-15	ILC2	Ets1
7.84467e-18	6.58876	0.667	0.017	1.63828e-13	ILC2	P2ry10
9.02532e-18	8.00076	0.333	0.004	1.88485e-13	ILC2	Ctnna2
9.02532e-18	7.68137	0.333	0.004	1.88485e-13	ILC2	Gm38604
9.02532e-18	8.50442	0.333	0.004	1.88485e-13	ILC2	Mbnl3
9.35857e-18	6.33947	1	0.04	1.95444e-13	ILC2	Il7r
9.93474e-18	6.99032	0.333	0.004	2.07477e-13	ILC2	Cd247
9.93474e-18	7.18192	0.333	0.004	2.07477e-13	ILC2	Muc1
9.93474e-18	6.77507	0.333	0.004	2.07477e-13	ILC2	Pbx4
9.93474e-18	7.38477	0.333	0.004	2.07477e-13	ILC2	Hist1h3i
1.09345e-17	6.90511	0.333	0.004	2.28356e-13	ILC2	Colec11
2.48362e-17	6.33873	0.667	0.017	5.18678e-13	ILC2	Icos
2.85844e-17	6.58176	0.667	0.017	5.96956e-13	ILC2	Padi2
4.35082e-17	5.68788	0.667	0.017	9.08625e-13	ILC2	Ltb
9.13717e-17	6.30234	0.667	0.018	1.90821e-12	ILC2	Abcb9
1.02814e-15	9.33226	0.333	0.004	2.14716e-11	ILC2	Sdcbp2
1.02814e-15	8.98206	0.333	0.004	2.14716e-11	ILC2	Slc4a8
1.02814e-15	8.24176	0.333	0.004	2.14716e-11	ILC2	Gm15472
1.02814e-15	8.74064	0.333	0.004	2.14716e-11	ILC2	Txk
1.11835e-15	6.96127	0.333	0.004	2.33556e-11	ILC2	Cpm
1.11835e-15	6.7157	0.333	0.004	2.33556e-11	ILC2	Klf5
5.23789e-15	7.24472	0.667	0.02	1.09388e-10	ILC2	Areg
4.11678e-14	7.58957	0.333	0.005	8.59747e-10	ILC2	Pde10a
4.43673e-14	6.89076	0.333	0.005	9.26566e-10	ILC2	Rmrp
4.7811e-14	6.74807	0.333	0.005	9.98484e-10	ILC2	Chek1
4.7811e-14	6.44528	0.333	0.005	9.98484e-10	ILC2	Ms4a4b
5.15171e-14	6.9479	0.333	0.005	1.07588e-09	ILC2	Actr3b
5.15171e-14	6.49541	0.333	0.005	1.07588e-09	ILC2	Tnfrsf26
5.15171e-14	6.16771	0.333	0.005	1.07588e-09	ILC2	Nt5e
5.97969e-14	5.61863	0.333	0.005	1.2488e-09	ILC2	Thy1
8.75543e-14	6.34909	0.667	0.022	1.82848e-09	ILC2	Slc25a40
7.92324e-13	7.1499	0.333	0.006	1.65469e-08	ILC2	Gm2479
8.47602e-13	6.78259	0.333	0.006	1.77013e-08	ILC2	Gm42726
8.47602e-13	6.34134	0.333	0.006	1.77013e-08	ILC2	Camk4
8.94623e-12	7.46781	0.333	0.006	1.86833e-07	ILC2	Nav3
9.51256e-12	6.78729	0.333	0.006	1.9866e-07	ILC2	Aqp9
1.0114e-11	6.35218	0.333	0.006	2.1122e-07	ILC2	Pdcd1lg2
3.06967e-11	6.22162	0.667	0.029	6.4107e-07	ILC2	Mir155hg
3.17768e-11	5.52469	1	0.07	6.63626e-07	ILC2	Sept6
6.69624e-11	6.82455	0.667	0.03	1.39844e-06	ILC2	Ar
8.47579e-11	6.27349	0.333	0.007	1.77008e-06	ILC2	2810021J22Rik
1.95524e-10	5.92737	0.667	0.031	4.08333e-06	ILC2	Tnik
2.58398e-10	4.6051	1	0.075	5.39639e-06	ILC2	Csrnp1
3.76269e-10	6.43115	0.333	0.008	7.85801e-06	ILC2	Ptgir
3.96376e-10	6.52977	0.333	0.008	8.27791e-06	ILC2	Fam71f2
4.63194e-10	5.97601	0.333	0.008	9.67335e-06	ILC2	Zkscan7
5.13721e-10	5.23774	0.333	0.008	1.07286e-05	ILC2	Rnf144a
6.86082e-10	5.41069	0.667	0.033	1.43281e-05	ILC2	Ablim1
1.64137e-09	9.75768	0.333	0.008	3.42784e-05	ILC2	Myo3b
1.64137e-09	6.87374	0.333	0.008	3.42784e-05	ILC2	Ptpn13
1.64137e-09	6.37601	0.333	0.008	3.42784e-05	ILC2	4932438H23Rik
1.69528e-09	4.49131	1	0.082	3.54043e-05	ILC2	Ccr2
1.99122e-09	6.01627	0.333	0.008	4.15846e-05	ILC2	Gm50397
2.77377e-09	5.66481	0.667	0.036	5.79273e-05	ILC2	Dtnb
5.89669e-09	7.78392	0.333	0.009	0.000123146	ILC2	Crispld1
5.89669e-09	7.31817	0.333	0.009	0.000123146	ILC2	Hs3st1
6.16945e-09	4.57674	0.333	0.009	0.000128843	ILC2	Nrgn
6.75226e-09	6.04748	0.333	0.009	0.000141014	ILC2	Mapk12
7.92548e-09	4.73237	0.667	0.038	0.000165516	ILC2	Impa2
1.59825e-08	4.57943	1	0.098	0.000333778	ILC2	Tmem64
1.80903e-08	7.29713	0.333	0.01	0.000377798	ILC2	Dffb
1.80903e-08	7.9159	0.333	0.01	0.000377798	ILC2	Vegfc
1.80903e-08	7.05213	0.333	0.01	0.000377798	ILC2	Rhbdl3
1.88746e-08	6.94596	0.333	0.01	0.000394176	ILC2	Twist2
1.88746e-08	6.034	0.333	0.01	0.000394176	ILC2	Scml4
2.20397e-08	4.30841	0.667	0.039	0.000460277	ILC2	Pparg
2.33137e-08	6.12725	0.667	0.041	0.000486883	ILC2	Pard3
2.78741e-08	4.90337	0.667	0.041	0.000582123	ILC2	Rad18
3.02815e-08	4.73917	1	0.105	0.000632399	ILC2	Ctla2a
3.78018e-08	5.14156	0.667	0.042	0.000789452	ILC2	Itgb7
4.87266e-08	6.29906	0.333	0.01	0.00101761	ILC2	Galnt3
4.87266e-08	8.85564	0.333	0.01	0.00101761	ILC2	Gimap1
4.87266e-08	6.53071	0.333	0.01	0.00101761	ILC2	Lrp3
5.2655e-08	4.94319	1	0.109	0.00109965	ILC2	Dgat1
5.2781e-08	6.13451	0.333	0.01	0.00110228	ILC2	5830428M24Rik
5.71614e-08	5.82346	0.333	0.01	0.00119376	ILC2	Proscos
6.43993e-08	5.51194	0.333	0.01	0.00134492	ILC2	Clcf1
1.17746e-07	7.31311	0.333	0.011	0.00245901	ILC2	Rhof
1.17746e-07	6.95209	0.333	0.011	0.00245901	ILC2	Ndnf
1.26989e-07	6.00189	0.333	0.011	0.00265203	ILC2	4930532G15Rik
1.85509e-07	5.04834	0.667	0.047	0.00387417	ILC2	Kif21b
2.59651e-07	7.35829	0.333	0.011	0.00542256	ILC2	Ehd3
2.78943e-07	5.91464	0.333	0.011	0.00582545	ILC2	Fhl2
2.99616e-07	5.92706	0.333	0.011	0.00625717	ILC2	Yes1
3.21764e-07	5.5137	0.333	0.011	0.00671972	ILC2	Arc
3.3016e-07	5.17047	0.667	0.048	0.00689506	ILC2	Trmt61b
4.86227e-07	5.0819	1	0.131	0.0101544	ILC2	Vps37b
5.67061e-07	5.9832	0.333	0.012	0.0118425	ILC2	Tmem156
5.70533e-07	4.64165	0.667	0.05	0.011915	ILC2	Pde2a
6.63699e-07	5.27268	0.667	0.052	0.0138607	ILC2	Adamts6
7.18892e-07	5.31221	0.333	0.012	0.0150133	ILC2	A930024E05Rik
7.50945e-07	4.4211	1	0.133	0.0156827	ILC2	Gpr132
1.0108e-06	9.781	0.333	0.013	0.0211095	ILC2	Ctla4
1.0108e-06	6.06072	0.333	0.013	0.0211095	ILC2	Igf2bp3
1.0108e-06	6.54544	0.333	0.013	0.0211095	ILC2	Cd226
1.22779e-06	5.10253	0.333	0.013	0.0256411	ILC2	Plag1
1.27364e-06	5.37565	1	0.146	0.0265988	ILC2	Emb
1.30202e-06	5.26261	0.667	0.055	0.0271913	ILC2	Tinf2
1.44146e-06	4.05318	1	0.138	0.0301034	ILC2	Ptpn9
1.77519e-06	3.88501	1	0.142	0.037073	ILC2	Slc38a1
1.82066e-06	6.41354	0.333	0.013	0.0380226	ILC2	Zfp280b
1.87627e-06	4.95237	0.667	0.055	0.0391841	ILC2	Sorbs1
1.87811e-06	5.99773	0.333	0.013	0.0392224	ILC2	Fam171b
1.92327e-06	4.18144	1	0.131	0.0401656	ILC2	Cytip
2.41623e-06	6.02591	0.667	0.059	0.0504605	ILC2	D16Ertd472e
3.11868e-06	7.01897	0.333	0.014	0.0651305	ILC2	Pear1
3.11868e-06	6.44149	0.333	0.014	0.0651305	ILC2	Fastkd3
3.51199e-06	5.7383	0.333	0.014	0.0733443	ILC2	Sept1
3.83773e-06	5.28809	0.333	0.014	0.0801472	ILC2	Gm44686
3.87388e-06	4.02145	1	0.157	0.0809022	ILC2	Ell2
4.08685e-06	4.78054	0.667	0.059	0.0853499	ILC2	Smad7
4.39362e-06	3.79876	1	0.15	0.0917563	ILC2	Elovl5
5.11213e-06	5.87958	0.333	0.015	0.106762	ILC2	1700084C06Rik
5.11213e-06	6.59666	0.333	0.015	0.106762	ILC2	Slc9a7
5.14301e-06	3.79769	1	0.155	0.107407	ILC2	Ppp2r2d
5.28773e-06	4.18934	1	0.15	0.110429	ILC2	Zeb1
5.40003e-06	7.75874	0.667	0.063	0.112774	ILC2	Hilpda
7.99156e-06	5.04779	1	0.177	0.166896	ILC2	Samsn1
8.71853e-06	4.64095	0.667	0.063	0.182078	ILC2	Cers4
1.0116e-05	3.81388	1	0.166	0.211263	ILC2	H2-Q7
1.04435e-05	4.04559	0.667	0.063	0.218102	ILC2	Rbmx
1.26112e-05	5.53838	0.333	0.016	0.263373	ILC2	Oas3
1.26112e-05	5.69518	0.333	0.016	0.263373	ILC2	Prr7
1.43837e-05	4.83767	0.333	0.016	0.300389	ILC2	Cish
1.45236e-05	4.98145	1	0.189	0.303312	ILC2	Rora
1.55357e-05	4.45488	0.667	0.069	0.324448	ILC2	Bzw2
1.77945e-05	3.90581	1	0.191	0.371621	ILC2	Paxbp1
1.81521e-05	5.91265	0.333	0.017	0.379087	ILC2	Cd28
1.85912e-05	3.59174	1	0.175	0.388258	ILC2	Lin7c
1.86199e-05	6.51458	0.333	0.017	0.388857	ILC2	Grik5
1.89147e-05	4.65473	0.667	0.071	0.395015	ILC2	Trmt1l
2.05169e-05	4.00954	1	0.174	0.428476	ILC2	Sla
2.27984e-05	5.02674	0.333	0.017	0.476122	ILC2	Hacl1
2.64688e-05	3.8045	1	0.177	0.552775	ILC2	AW112010
2.86446e-05	3.40873	1	0.194	0.598214	ILC2	Prkch
3.09819e-05	5.14205	0.333	0.017	0.647026	ILC2	Psd
3.22693e-05	4.95849	0.667	0.075	0.673912	ILC2	Il2rg
4.12363e-05	5.26125	0.333	0.018	0.86118	ILC2	Fam102a
4.26975e-05	4.14395	1	0.217	0.891694	ILC2	Eprs
4.56454e-05	4.86819	0.667	0.074	0.953259	ILC2	Setbp1
5.26458e-05	5.55725	0.333	0.018	1	ILC2	Blm
5.90208e-05	4.88816	0.333	0.018	1	ILC2	Cdon
6.76598e-05	6.07237	0.333	0.019	1	ILC2	2510046G10Rik
6.98694e-05	6.23138	0.667	0.082	1	ILC2	Il1rl1
8.01527e-05	3.62942	0.667	0.078	1	ILC2	Mxd1
8.28062e-05	4.00452	1	0.235	1	ILC2	Crem
8.62975e-05	4.51701	0.333	0.019	1	ILC2	Hist1h4n
8.94093e-05	6.20568	0.333	0.02	1	ILC2	Zfp707
9.13596e-05	5.79219	0.333	0.02	1	ILC2	Zc3h12d
9.31168e-05	4.86564	1	0.251	1	ILC2	Pim1
9.47627e-05	4.16848	1	0.249	1	ILC2	Nabp1
0.000116222	5.55639	0.333	0.02	1	ILC2	Fam234b
0.000122849	4.72764	0.667	0.087	1	ILC2	H2-Q6
0.000137309	4.3076	0.667	0.089	1	ILC2	Ankrd49
0.000146133	4.55334	0.333	0.02	1	ILC2	Ppm1l
0.000156726	4.36103	0.667	0.091	1	ILC2	Gstp1
0.000161419	5.04727	0.333	0.021	1	ILC2	4930444A19Rik
0.000169312	4.08082	0.667	0.087	1	ILC2	Smarcd1
0.000187759	3.94767	0.667	0.087	1	ILC2	A930015D03Rik
0.000187966	5.65137	0.333	0.022	1	ILC2	Slc17a9
0.000187966	6.00703	0.333	0.022	1	ILC2	Zfp799
0.000190367	4.65345	0.667	0.094	1	ILC2	Tle3
0.000205547	2.90813	1	0.217	1	ILC2	Myo1e
0.000211586	4.9258	0.333	0.022	1	ILC2	Cad
0.000224415	4.60662	0.333	0.022	1	ILC2	Klhl12
0.000234431	5.71053	0.333	0.022	1	ILC2	Gm26549
0.000237972	4.55202	0.333	0.022	1	ILC2	Dars2
0.000242893	2.87272	1	0.261	1	ILC2	Hcst
0.00024363	5.80566	0.333	0.022	1	ILC2	Prickle3
0.000272828	3.73929	1	0.297	1	ILC2	Prdx6
0.000289011	6.58049	0.333	0.023	1	ILC2	Galnt6
0.00030005	5.21425	0.333	0.023	1	ILC2	Zfp949
0.000323322	4.74271	0.333	0.023	1	ILC2	Cenpl
0.000339866	3.69146	0.667	0.092	1	ILC2	Ripor2
0.000354791	4.52602	0.333	0.023	1	ILC2	Gm50209
0.00035901	5.95124	0.333	0.024	1	ILC2	Hip1r
0.000361678	3.49419	0.667	0.094	1	ILC2	Cnnm2
0.000375023	4.53471	0.333	0.023	1	ILC2	Enc1
0.000378836	3.77819	1	0.333	1	ILC2	Peli1
0.00043833	4.53777	0.333	0.024	1	ILC2	Wdr55
0.000441171	5.13408	0.333	0.024	1	ILC2	Polg2
0.00050087	3.08695	1	0.336	1	ILC2	Tut4
0.000508319	4.45663	0.333	0.024	1	ILC2	Rsph3b
0.000509478	5.53455	0.333	0.025	1	ILC2	Satb1
0.000546126	5.28279	0.333	0.025	1	ILC2	Nhs
0.000604552	5.64104	0.333	0.026	1	ILC2	Thap4
0.000611032	3.06007	1	0.32	1	ILC2	Nfkb1
0.00061491	5.06741	0.333	0.026	1	ILC2	Plscr1
0.00061491	5.55596	0.333	0.026	1	ILC2	Gm50240
0.000676351	4.0127	0.667	0.113	1	ILC2	Lsm8
0.000711733	5.89596	0.333	0.026	1	ILC2	BE692007
0.000717021	3.48404	0.667	0.106	1	ILC2	Rev3l
0.000786037	4.60723	0.333	0.026	1	ILC2	Zrsr1
0.000881801	4.39963	0.333	0.026	1	ILC2	Tmem138
0.000911086	4.28509	0.333	0.026	1	ILC2	Tbc1d25
0.000926064	4.25202	0.333	0.026	1	ILC2	AV099323
0.000980908	5.2138	0.333	0.027	1	ILC2	Grap2
0.000991893	3.83123	0.667	0.112	1	ILC2	Rps6kb1
0.00105062	3.74835	0.667	0.113	1	ILC2	Amz2
0.00111347	5.75566	0.333	0.028	1	ILC2	Cd2
0.00111347	6.07364	0.333	0.028	1	ILC2	Runx1t1
0.00114859	5.03435	0.333	0.028	1	ILC2	Taf1a
0.00116653	5.0582	0.333	0.028	1	ILC2	Ipcef1
0.00118633	3.51413	0.667	0.119	1	ILC2	Cwc25
0.00122263	3.64984	0.667	0.12	1	ILC2	Sorl1
0.00126018	4.30236	0.333	0.028	1	ILC2	Tnfrsf25
0.00128043	3.67759	0.667	0.117	1	ILC2	Papss1
0.00131965	4.0887	0.333	0.028	1	ILC2	Ltb4r1
0.00132007	2.40124	1	0.299	1	ILC2	Selplg
0.00147709	4.97997	0.333	0.029	1	ILC2	Cd4
0.00147709	4.88828	0.333	0.029	1	ILC2	Trmu
0.00148045	3.68368	0.667	0.121	1	ILC2	Glrx
0.00148065	2.55909	1	0.323	1	ILC2	Phb2
0.00152169	4.78007	0.333	0.029	1	ILC2	Zbtb25
0.00153491	2.72419	1	0.492	1	ILC2	Nr3c1
0.00155347	3.97299	0.333	0.029	1	ILC2	Cd274
0.00173802	3.68299	0.667	0.131	1	ILC2	Hadh
0.00180685	3.22617	0.667	0.121	1	ILC2	Suco
0.00181714	3.56981	1	0.464	1	ILC2	Saraf
0.00182981	4.82477	0.667	0.129	1	ILC2	Traf1
0.00186027	3.18126	1	0.528	1	ILC2	Shisa5
0.00197183	4.79172	0.333	0.031	1	ILC2	Cyfip2
0.00200013	4.53169	0.333	0.031	1	ILC2	Gm43661
0.00204885	3.13543	1	0.36	1	ILC2	Tmsb10
0.00209169	5.23105	0.333	0.031	1	ILC2	Zfp212
0.00217419	3.20917	0.667	0.126	1	ILC2	Ilf2
0.00220893	4.31003	0.333	0.031	1	ILC2	Fen1
0.00224512	2.40743	1	0.399	1	ILC2	Gm47283
0.00237159	4.77669	0.333	0.032	1	ILC2	Eif2d
0.00240446	5.10748	0.333	0.032	1	ILC2	Zfp788
0.00247146	4.83976	0.333	0.032	1	ILC2	Ddb2
0.002473	4.36856	0.333	0.031	1	ILC2	Telo2
0.00249007	3.00692	1	0.663	1	ILC2	Junb
0.00260505	4.96097	0.333	0.033	1	ILC2	Acot7
0.00264649	4.18564	0.333	0.032	1	ILC2	H2-Oa
0.00276733	3.96333	0.667	0.146	1	ILC2	Ern1
0.00279641	3.48142	0.667	0.141	1	ILC2	Fam107b
0.00295024	4.11552	0.333	0.032	1	ILC2	Gm16062
0.00295886	3.03678	0.667	0.132	1	ILC2	Smox
0.00304188	3.1388	0.667	0.134	1	ILC2	Hspa14
0.00314377	3.88468	0.333	0.033	1	ILC2	Ly6a
0.00318589	4.07868	0.333	0.033	1	ILC2	Ogg1
0.00318589	4.08761	0.333	0.033	1	ILC2	Prdm4
0.00322534	2.24904	1	0.529	1	ILC2	Rac2
0.00323607	5.20828	0.333	0.034	1	ILC2	Ift80
0.00327167	3.30499	0.667	0.145	1	ILC2	Isy1
0.00327852	4.69038	0.333	0.034	1	ILC2	Yars2
0.00332149	4.64772	0.333	0.034	1	ILC2	Rpap1
0.0033557	1.58485	1	0.994	1	ILC2	Rps27
0.00348611	5.2132	0.667	0.154	1	ILC2	Odc1
0.003603	2.62422	1	0.566	1	ILC2	Nfkbia
0.00363626	3.73153	0.333	0.033	1	ILC2	Fmo3
0.0036378	2.00711	1	0.43	1	ILC2	Srsf7
0.00375255	3.25524	1	0.71	1	ILC2	Btg1
0.00375841	3.78056	0.333	0.033	1	ILC2	Gm44148
0.00377496	2.02691	1	0.43	1	ILC2	Ccnl1
0.00383208	3.55768	0.333	0.033	1	ILC2	Gm6213
0.00387656	2.34634	1	0.568	1	ILC2	Sumo1
0.00399941	2.26373	1	0.781	1	ILC2	Ptp4a2
0.00400764	2.44133	1	0.4	1	ILC2	Rab21
0.00401071	4.44893	0.333	0.035	1	ILC2	Entpd6
0.00408375	3.47603	0.667	0.158	1	ILC2	Sidt2
0.00409975	3.31887	0.667	0.152	1	ILC2	Rlf
0.00414244	3.27235	0.667	0.142	1	ILC2	Atp11b
0.00419918	2.29848	1	0.408	1	ILC2	Cited2
0.0042264	5.07223	0.333	0.036	1	ILC2	Phf7
0.00427911	4.41469	0.333	0.036	1	ILC2	Jrkl
0.00438633	4.63366	0.333	0.036	1	ILC2	Cox11
0.00442145	3.86395	0.333	0.034	1	ILC2	A630072M18Rik
0.00442967	3.44183	0.667	0.158	1	ILC2	Aebp2
0.00462845	2.04611	1	0.803	1	ILC2	Uba52
0.00464575	1.85391	1	0.501	1	ILC2	Micos13
0.00482001	3.0495	1	0.401	1	ILC2	Nudcd3
0.00483496	4.11754	0.333	0.035	1	ILC2	Plcg1
0.00487416	3.648	0.667	0.164	1	ILC2	Kpna1
0.0049636	2.29882	1	0.406	1	ILC2	Smarca5
0.00496568	3.70624	0.667	0.166	1	ILC2	Chd7
0.0052409	2.39782	1	0.9	1	ILC2	Jund
0.00530491	1.6178	1	0.98	1	ILC2	Rps14
0.00533568	3.47398	0.333	0.036	1	ILC2	Heg1
0.00534186	2.80412	0.667	0.146	1	ILC2	Phtf2
0.00579954	3.93606	0.333	0.036	1	ILC2	Bpnt1
0.00583438	3.3278	0.667	0.167	1	ILC2	Tmem230
0.00593944	3.70419	0.333	0.036	1	ILC2	Lekr1
0.005953	3.30585	0.667	0.168	1	ILC2	Mfap1b
0.00607958	3.25279	0.667	0.154	1	ILC2	Rbm33
0.00613149	2.14508	1	0.544	1	ILC2	Swi5
0.00623094	2.84388	0.667	0.154	1	ILC2	Rptor
0.00633993	2.83404	0.667	0.151	1	ILC2	Mfsd10
0.00643526	5.02629	0.333	0.039	1	ILC2	Il1r1
0.00643526	4.39478	0.333	0.039	1	ILC2	Cldn34c1
0.00673579	4.21824	0.333	0.039	1	ILC2	Eml1
0.00695862	1.65726	1	0.821	1	ILC2	Snrpg
0.00708855	4.58134	0.333	0.04	1	ILC2	Mtfr1
0.00709174	2.77149	0.667	0.154	1	ILC2	Elk4
0.00731137	3.12074	0.667	0.159	1	ILC2	Akap8
0.00744805	5.14548	0.333	0.04	1	ILC2	Chpf
0.00744805	4.48749	0.333	0.04	1	ILC2	Ftx
0.00763043	2.08526	1	0.55	1	ILC2	Spcs2
0.00764145	2.80144	0.667	0.16	1	ILC2	Dpp8
0.00778833	1.9395	1	0.421	1	ILC2	Tgoln1
0.00790012	5.48025	0.333	0.041	1	ILC2	Gm8369
0.00812309	4.54277	0.667	0.183	1	ILC2	Mxi1
0.00816346	4.41169	0.333	0.041	1	ILC2	Serpinb6b
0.00825297	4.37419	0.333	0.041	1	ILC2	Hist1h4d
0.0084561	4.69059	0.333	0.041	1	ILC2	Wdr76
0.0085478	4.69703	0.333	0.041	1	ILC2	Lmbr1l
0.00862555	3.30609	0.333	0.039	1	ILC2	Pecam1
0.00878257	2.67794	0.667	0.159	1	ILC2	Ugcg
0.00892354	4.22373	0.333	0.041	1	ILC2	Mettl15
0.00893063	3.18416	0.667	0.186	1	ILC2	Uchl5
0.00900125	3.79293	0.333	0.041	1	ILC2	Fam160a2
0.00919755	4.10292	0.333	0.041	1	ILC2	Socs2
0.00939045	1.57464	1	0.585	1	ILC2	Pnrc1
0.00948886	2.87011	0.667	0.173	1	ILC2	Esyt1
0.00980955	3.7602	0.333	0.041	1	ILC2	Tyms
0.00993175	3.20539	0.667	0.193	1	ILC2	Spty2d1
2.81634e-106	9.90643	0.367	0.001	5.88164e-102	Monocytes	Ly6i
4.69292e-94	7.56172	0.533	0.01	9.80068e-90	Monocytes	Plac8
2.62556e-83	6.34152	0.433	0.006	5.48321e-79	Monocytes	F10
1.57616e-74	8.2072	0.4	0.006	3.29165e-70	Monocytes	Treml4
5.36366e-71	7.05604	0.333	0.004	1.12015e-66	Monocytes	Chil3
4.44013e-66	5.53195	0.7	0.036	9.27277e-62	Monocytes	Itgal
2.16179e-62	4.98202	0.4	0.009	4.51467e-58	Monocytes	Olr1
2.59321e-58	5.53126	0.533	0.021	5.41566e-54	Monocytes	Ear2
6.09492e-45	5.35911	0.333	0.01	1.27286e-40	Monocytes	Sirpb1c
3.65595e-42	4.39832	0.7	0.062	7.63509e-38	Monocytes	Napsa
1.28989e-37	4.88889	0.367	0.016	2.6938e-33	Monocytes	Pglyrp1
5.47242e-36	3.41439	0.3	0.01	1.14286e-31	Monocytes	Hp
6.79985e-35	5.32439	0.467	0.032	1.42008e-30	Monocytes	Pparg
3.88712e-34	5.02668	0.8	0.112	8.11785e-30	Monocytes	Gngt2
1.35231e-32	4.93837	0.4	0.024	2.82415e-28	Monocytes	Cyfip2
2.01226e-31	5.00851	0.3	0.013	4.20241e-27	Monocytes	Gpr141
1.58004e-30	4.38032	0.533	0.05	3.29976e-26	Monocytes	Fgr
5.95256e-28	3.57747	0.767	0.12	1.24313e-23	Monocytes	Cytip
7.1223e-27	4.09304	0.567	0.065	1.48742e-22	Monocytes	Havcr2
8.01258e-27	5.65855	0.533	0.06	1.67335e-22	Monocytes	Apoc2
6.06953e-26	5.36606	0.333	0.021	1.26756e-21	Monocytes	Runx2
1.48669e-21	4.04161	0.6	0.094	3.10481e-17	Monocytes	Xylt1
3.73156e-21	5.56131	0.3	0.022	7.79298e-17	Monocytes	Ceacam1
3.60352e-20	4.67781	0.433	0.051	7.52559e-16	Monocytes	Grk3
7.52935e-20	4.70119	0.3	0.023	1.57243e-15	Monocytes	Spn
9.93872e-20	3.17907	0.6	0.101	2.0756e-15	Monocytes	Plaur
2.17072e-19	5.41595	0.433	0.055	4.53333e-15	Monocytes	Ace
2.43486e-19	3.91302	0.3	0.024	5.08496e-15	Monocytes	Pygl
4.75063e-19	4.12505	0.3	0.024	9.92122e-15	Monocytes	Cd274
8.3323e-18	2.46275	0.967	0.393	1.74012e-13	Monocytes	Lgals3
1.43234e-17	3.57648	0.6	0.114	2.9913e-13	Monocytes	Abcg1
9.51762e-17	4.46616	0.3	0.029	1.98766e-12	Monocytes	Abi3
3.50515e-16	4.1483	0.333	0.038	7.32016e-12	Monocytes	Zfyve9
1.95e-15	3.32326	0.333	0.038	4.07238e-11	Monocytes	C3
1.10612e-14	2.98364	0.8	0.333	2.31003e-10	Monocytes	Msrb1
1.1768e-14	3.70627	0.4	0.059	2.45764e-10	Monocytes	Dusp2
1.61581e-14	4.41121	0.367	0.051	3.37446e-10	Monocytes	Clec4e
9.12448e-14	4.98147	0.333	0.045	1.90556e-09	Monocytes	Adgre4
1.54341e-13	3.26928	0.433	0.077	3.22326e-09	Monocytes	Malt1
1.91983e-13	4.1329	0.333	0.045	4.00937e-09	Monocytes	Klra2
2.71735e-13	2.84299	0.8	0.352	5.67492e-09	Monocytes	Tmsb10
5.53586e-13	3.69131	0.5	0.11	1.15611e-08	Monocytes	Tgm2
7.28843e-13	2.76467	0.8	0.308	1.52211e-08	Monocytes	Mpeg1
1.12868e-12	3.94237	0.3	0.038	2.35713e-08	Monocytes	Ms4a4c
1.30718e-12	3.26342	0.4	0.069	2.72992e-08	Monocytes	Il2rg
2.78662e-12	3.33421	0.433	0.086	5.81958e-08	Monocytes	Sema4d
2.92911e-12	4.65559	0.267	0.032	6.11715e-08	Monocytes	Eno3
5.19574e-12	2.04449	0.833	0.347	1.08508e-07	Monocytes	Lsp1
1.0572e-11	3.68744	0.4	0.075	2.20786e-07	Monocytes	B4galnt1
1.73322e-10	3.17881	0.5	0.136	3.61966e-06	Monocytes	Gsr
6.17195e-10	2.01718	0.833	0.449	1.28895e-05	Monocytes	Gm2a
6.33527e-10	3.6053	0.333	0.061	1.32306e-05	Monocytes	Tmc6
7.11557e-10	2.01364	0.867	0.614	1.48602e-05	Monocytes	Lst1
1.06099e-09	3.124	0.467	0.123	2.21577e-05	Monocytes	Myo1g
1.5745e-09	1.89697	0.833	0.463	3.28818e-05	Monocytes	Cebpb
1.67039e-09	3.04374	0.5	0.14	3.48844e-05	Monocytes	Fyn
2.18032e-09	1.72279	0.867	0.565	4.55339e-05	Monocytes	Cd52
3.08681e-09	3.72773	0.3	0.053	6.44649e-05	Monocytes	Morrbid
3.58454e-09	2.60555	0.5	0.146	7.48595e-05	Monocytes	Cxcr4
3.69612e-09	2.29284	0.6	0.204	7.71899e-05	Monocytes	Emilin2
3.70501e-09	1.76815	0.9	0.707	7.73754e-05	Monocytes	Btg1
3.87074e-09	2.49589	0.333	0.066	8.08366e-05	Monocytes	Fabp5
4.48584e-09	2.33222	0.7	0.312	9.36824e-05	Monocytes	Cd44
4.59048e-09	2.47312	0.467	0.124	9.58676e-05	Monocytes	Traf1
5.19408e-09	3.90825	0.433	0.117	0.000108473	Monocytes	Cyp4f18
5.74105e-09	3.32562	0.3	0.054	0.000119896	Monocytes	Dusp5
6.42652e-09	1.94563	0.733	0.336	0.000134211	Monocytes	Adgre5
6.76685e-09	2.54951	0.533	0.161	0.000141319	Monocytes	B4galt5
7.31037e-09	2.34129	0.467	0.125	0.00015267	Monocytes	Plbd1
7.31473e-09	3.81487	0.267	0.045	0.000152761	Monocytes	Slc16a3
8.04276e-09	2.57849	0.333	0.066	0.000167965	Monocytes	Itgax
9.26726e-09	2.50034	0.6	0.217	0.000193537	Monocytes	Stap1
9.59688e-09	1.6966	0.933	0.605	0.000200421	Monocytes	Coro1a
1.07678e-08	2.14084	0.767	0.395	0.000224876	Monocytes	Anxa2
1.2698e-08	1.867	0.633	0.245	0.000265185	Monocytes	Pim1
1.44729e-08	1.62077	0.833	0.487	0.000302253	Monocytes	Tpm4
1.65124e-08	2.82535	0.4	0.101	0.000344845	Monocytes	Gfpt1
2.04365e-08	1.67904	0.933	0.793	0.000426796	Monocytes	Cybb
2.24675e-08	2.80005	0.333	0.071	0.000469211	Monocytes	Bcl2a1a
2.30321e-08	3.85226	0.4	0.106	0.000481002	Monocytes	Ifitm6
2.32263e-08	1.66728	0.933	0.704	0.000485059	Monocytes	Ptprc
2.39121e-08	2.86227	0.467	0.136	0.000499381	Monocytes	Phlpp1
3.81308e-08	3.10364	0.267	0.047	0.000796323	Monocytes	Arl5c
5.13869e-08	2.76642	0.5	0.167	0.00107316	Monocytes	Cers6
5.73994e-08	2.75593	0.267	0.047	0.00119873	Monocytes	Rab11fip1
6.2224e-08	2.04636	0.733	0.381	0.00129949	Monocytes	Apbb1ip
6.26677e-08	2.22854	0.7	0.339	0.00130875	Monocytes	Cycs
7.21341e-08	2.85176	0.567	0.23	0.00150645	Monocytes	Nedd9
1.017e-07	1.89707	0.633	0.274	0.00212391	Monocytes	Vasp
1.16706e-07	2.26511	0.667	0.311	0.0024373	Monocytes	Ppp2r5a
1.78158e-07	2.39996	0.367	0.09	0.00372065	Monocytes	Bcl2a1d
1.93458e-07	2.61745	0.433	0.129	0.00404018	Monocytes	Gpr132
2.08412e-07	1.53396	0.833	0.493	0.00435248	Monocytes	S100a4
2.21845e-07	1.82289	0.8	0.558	0.00463302	Monocytes	Txn1
3.26132e-07	2.066	0.733	0.425	0.00681095	Monocytes	Ccnl1
3.33445e-07	3.04967	0.3	0.067	0.00696366	Monocytes	Sowahc
3.78799e-07	2.39351	0.433	0.128	0.00791083	Monocytes	Traf3
4.02277e-07	2.0362	0.7	0.371	0.00840115	Monocytes	Rel
4.37063e-07	2.02481	0.867	0.789	0.00912762	Monocytes	Srgn
5.32351e-07	2.41042	0.5	0.194	0.0111176	Monocytes	Mir22hg
5.4721e-07	1.54715	0.8	0.546	0.0114279	Monocytes	Abracl
5.69914e-07	2.06432	0.6	0.267	0.0119021	Monocytes	Ncf4
6.44219e-07	2.28568	0.433	0.134	0.0134539	Monocytes	Ripk2
9.85351e-07	3.16066	0.267	0.057	0.0205781	Monocytes	P2ry10b
1.15589e-06	1.98383	0.633	0.291	0.0241397	Monocytes	Prdx6
1.26143e-06	3.35635	0.267	0.059	0.0263437	Monocytes	Gcnt2
1.59896e-06	2.50755	0.5	0.189	0.0333927	Monocytes	Prkch
1.60578e-06	2.21152	0.433	0.138	0.0335351	Monocytes	Rnf149
1.80394e-06	2.29014	0.567	0.265	0.0376735	Monocytes	Hck
1.84576e-06	3.10206	0.533	0.247	0.0385468	Monocytes	Itga4
2.45372e-06	3.36275	0.267	0.062	0.0512435	Monocytes	Rap1gap2
2.72248e-06	2.42346	0.367	0.112	0.0568563	Monocytes	Pilra
2.86326e-06	1.9504	0.633	0.317	0.0597964	Monocytes	Ikbkb
3.4425e-06	2.05241	0.267	0.06	0.0718932	Monocytes	Tnip3
3.45672e-06	2.70985	0.8	0.661	0.0721901	Monocytes	Prdx5
6.28407e-06	2.12239	0.467	0.177	0.131237	Monocytes	Foxn2
6.62712e-06	2.10645	0.433	0.156	0.138401	Monocytes	Pmaip1
6.83147e-06	2.6767	0.367	0.123	0.142668	Monocytes	Adssl1
7.4968e-06	1.67479	0.667	0.406	0.156563	Monocytes	Itgb2
8.27029e-06	2.53107	0.433	0.162	0.172717	Monocytes	H2-Q7
8.93756e-06	3.06904	0.3	0.086	0.186652	Monocytes	Fabp4
9.5617e-06	2.02095	0.3	0.079	0.199687	Monocytes	Acp5
9.65959e-06	1.81624	0.6	0.3	0.201731	Monocytes	Ube2a
9.73702e-06	1.94933	0.6	0.302	0.203348	Monocytes	Slc11a1
1.58705e-05	2.2243	0.367	0.121	0.331439	Monocytes	Bin2
2.14109e-05	2.44847	0.433	0.175	0.447146	Monocytes	Ptk2b
2.33059e-05	2.33351	0.267	0.069	0.486721	Monocytes	Rnase6
2.36171e-05	1.7528	0.633	0.377	0.49322	Monocytes	Diaph1
2.49157e-05	2.9374	0.367	0.132	0.52034	Monocytes	Stk10
3.22695e-05	2.33749	0.433	0.177	0.673916	Monocytes	Cop1
3.4268e-05	1.68115	0.667	0.416	0.715653	Monocytes	Slc15a3
4.20139e-05	1.66137	0.667	0.406	0.877418	Monocytes	Cd300a
4.93371e-05	1.51824	0.633	0.352	1	Monocytes	Cd300c2
7.9134e-05	1.52869	0.767	0.581	1	Monocytes	Mrpl33
8.21288e-05	2.40806	0.467	0.215	1	Monocytes	Arhgap26
8.49434e-05	2.15055	0.6	0.348	1	Monocytes	Pou2f2
8.61472e-05	1.68658	0.767	0.57	1	Monocytes	Cdk2ap2
8.7021e-05	1.57828	0.667	0.396	1	Monocytes	Bcl2a1b
0.000104069	1.53456	0.7	0.43	1	Monocytes	Tgfb1
0.000128282	1.82707	0.467	0.225	1	Monocytes	Stk24
0.00013141	2.00412	0.333	0.112	1	Monocytes	Gm6377
0.000151643	1.81416	0.367	0.135	1	Monocytes	Frrs1
0.00016661	2.27999	0.4	0.174	1	Monocytes	Samsn1
0.000181178	1.6733	0.433	0.181	1	Monocytes	Ak2
0.000181762	2.84523	0.267	0.086	1	Monocytes	Gpd2
0.000229145	1.61588	0.6	0.319	1	Monocytes	Tmed5
0.000237577	1.70335	0.267	0.08	1	Monocytes	Ccr2
0.000239751	2.29691	0.3	0.103	1	Monocytes	Tnip1
0.000242605	1.78033	0.367	0.139	1	Monocytes	Slc38a1
0.000245249	1.61614	0.6	0.313	1	Monocytes	Osbpl8
0.000255874	2.16489	0.367	0.156	1	Monocytes	Trib1
0.000290548	2.77033	0.367	0.144	1	Monocytes	Il1b
0.000370668	3.06647	0.3	0.114	1	Monocytes	Nr4a2
0.000438414	1.60414	0.367	0.141	1	Monocytes	Atp8b4
0.000494287	1.71068	0.567	0.354	1	Monocytes	Acer3
0.000526258	2.01134	0.3	0.108	1	Monocytes	Pilrb2
0.000557693	1.95298	0.4	0.194	1	Monocytes	Ccrl2
0.000590661	2.78532	0.3	0.121	1	Monocytes	Agpat4
0.000630078	2.05007	0.333	0.136	1	Monocytes	Gsto1
0.000660007	2.50806	0.267	0.094	1	Monocytes	Sipa1l3
0.000720544	1.7355	0.467	0.239	1	Monocytes	Arhgef1
0.000927234	1.87875	0.467	0.262	1	Monocytes	Smpdl3a
0.00122308	1.91619	0.333	0.144	1	Monocytes	Rilpl2
0.0012867	2.70766	0.333	0.14	1	Monocytes	Cks2
0.00129266	1.63717	0.367	0.166	1	Monocytes	Nemf
0.00131304	1.78862	0.567	0.376	1	Monocytes	Myo1f
0.00137028	2.62293	0.3	0.128	1	Monocytes	Cblb
0.00144148	2.0103	0.367	0.175	1	Monocytes	Bcl2l11
0.00145663	1.78663	0.533	0.366	1	Monocytes	Psmb10
0.00156279	1.97728	0.333	0.152	1	Monocytes	Gsap
0.00162843	1.61504	0.367	0.164	1	Monocytes	Chd7
0.00187072	2.14041	0.267	0.101	1	Monocytes	Cep83
0.00187072	2.23486	0.267	0.103	1	Monocytes	Avpi1
0.00205822	2.0536	0.267	0.102	1	Monocytes	Gm21188
0.00211597	2.3854	0.267	0.105	1	Monocytes	Fcgr4
0.00228001	2.2106	0.267	0.112	1	Monocytes	Raf1
0.00235998	2.42408	0.433	0.247	1	Monocytes	Nabp1
0.0023731	2.16468	0.3	0.128	1	Monocytes	Clec4d
0.00262516	1.57993	0.333	0.14	1	Monocytes	Rab32
0.00280729	1.50007	0.7	0.528	1	Monocytes	Mapkapk2
0.00287171	1.5456	0.367	0.184	1	Monocytes	Plcg2
0.0031091	2.01305	0.3	0.13	1	Monocytes	Ufd1
0.003303	1.828	0.333	0.152	1	Monocytes	Mfap1a
0.00347459	3.98296	0.333	0.148	1	Monocytes	Rgs1
0.00351626	1.76351	0.433	0.24	1	Monocytes	Tnfrsf1b
0.00362428	2.65315	0.3	0.14	1	Monocytes	Atp11b
0.00363407	1.96874	0.367	0.188	1	Monocytes	Fam49a
0.00391169	1.66011	0.5	0.363	1	Monocytes	Aprt
0.00406338	1.99441	0.367	0.182	1	Monocytes	Lat2
0.00449776	2.06681	0.267	0.11	1	Monocytes	Mapkapk3
0.00471757	1.57054	0.333	0.162	1	Monocytes	Sik2
0.00504344	1.76194	0.467	0.31	1	Monocytes	Ccdc88a
0.0056058	2.62704	0.5	0.33	1	Monocytes	Sod2
0.00626638	1.66438	0.467	0.319	1	Monocytes	Gpcpd1
0.00658146	1.64887	0.3	0.139	1	Monocytes	Fam107b
0.00862294	1.70243	0.4	0.258	1	Monocytes	Tnfaip2
0.00997357	2.57733	0.267	0.13	1	Monocytes	Vps37b
1.10192e-66	2.43036	0.629	0.085	2.30125e-62	InflammatoryMacs	Gngt2
1.11678e-62	3.18536	0.664	0.107	2.33228e-58	InflammatoryMacs	Il1b
1.35345e-46	1.96658	0.974	0.538	2.82654e-42	InflammatoryMacs	Cd52
1.45589e-40	2.75944	0.655	0.179	3.04049e-36	InflammatoryMacs	Cd72
1.75014e-38	2.83549	0.293	0.027	3.65499e-34	InflammatoryMacs	Mmp12
2.52402e-37	2.69445	0.457	0.08	5.27117e-33	InflammatoryMacs	Fcgr4
1.69941e-36	1.93305	0.974	0.687	3.54904e-32	InflammatoryMacs	Cd74
1.45003e-33	2.03455	0.819	0.368	3.02824e-29	InflammatoryMacs	Bcl2a1b
3.49509e-33	2.08611	0.81	0.362	7.29915e-29	InflammatoryMacs	H2-DMb1
2.22163e-32	1.97821	0.897	0.522	4.63964e-28	InflammatoryMacs	H2-Ab1
3.21058e-32	1.84445	0.888	0.482	6.70497e-28	InflammatoryMacs	H2-Aa
1.11143e-31	2.04001	0.871	0.495	2.3211e-27	InflammatoryMacs	H2-Eb1
5.33348e-31	3.04634	0.336	0.051	1.11384e-26	InflammatoryMacs	F11r
6.23094e-31	1.91297	0.741	0.283	1.30127e-26	InflammatoryMacs	Mpeg1
1.28692e-30	2.78548	0.698	0.269	2.6876e-26	InflammatoryMacs	Ccl4
2.52552e-30	2.3913	0.578	0.175	5.27429e-26	InflammatoryMacs	Glipr1
1.34234e-29	1.87243	0.759	0.326	2.80334e-25	InflammatoryMacs	Cd300c2
1.21043e-27	1.80888	0.845	0.493	2.52786e-23	InflammatoryMacs	Hexb
4.99506e-27	2.05162	0.483	0.125	1.04317e-22	InflammatoryMacs	Rgs1
7.71687e-27	2.65547	0.474	0.123	1.61159e-22	InflammatoryMacs	Scimp
1.20494e-26	1.94186	0.75	0.345	2.51639e-22	InflammatoryMacs	Basp1
1.03416e-25	2.03493	0.448	0.107	2.15973e-21	InflammatoryMacs	Plbd1
3.40814e-25	2.78239	0.336	0.064	7.11757e-21	InflammatoryMacs	Cadm1
1.75312e-24	3.20263	0.336	0.067	3.66122e-20	InflammatoryMacs	Zmynd15
7.10123e-24	2.54669	0.353	0.074	1.48302e-19	InflammatoryMacs	Bcl2a1d
1.40223e-22	2.1652	0.56	0.197	2.92841e-18	InflammatoryMacs	Stap1
2.77928e-22	2.71712	0.302	0.058	5.80425e-18	InflammatoryMacs	Bcl2a1a
4.12856e-22	1.76381	0.526	0.172	8.6221e-18	InflammatoryMacs	Ccrl2
5.85381e-22	2.24552	0.853	0.482	1.22251e-17	InflammatoryMacs	Cxcl2
5.83627e-20	1.70996	0.664	0.308	1.21885e-15	InflammatoryMacs	Slamf9
2.56625e-18	2.05617	0.422	0.129	5.35935e-14	InflammatoryMacs	Slamf7
7.45684e-17	2.31321	0.302	0.076	1.55729e-12	InflammatoryMacs	Sema4d
1.16078e-16	2.39891	0.284	0.067	2.42418e-12	InflammatoryMacs	Ccr2
3.68759e-15	2.26251	0.25	0.057	7.70116e-11	InflammatoryMacs	Itgax
4.04975e-15	2.40032	0.267	0.065	8.45751e-11	InflammatoryMacs	Mmp14
1.03874e-14	2.45117	0.259	0.064	2.1693e-10	InflammatoryMacs	Arhgap24
1.75013e-14	1.5564	0.31	0.087	3.65497e-10	InflammatoryMacs	Xylt1
3.80729e-14	2.05718	0.595	0.327	7.95114e-10	InflammatoryMacs	Ccl3
5.68527e-12	1.82379	0.362	0.138	1.18731e-07	InflammatoryMacs	AU020206
1.29829e-10	1.51255	0.345	0.133	2.71136e-06	InflammatoryMacs	Col14a1
3.77049e-10	1.64323	0.276	0.093	7.87429e-06	InflammatoryMacs	Itga6
4.562e-10	1.60795	0.302	0.111	9.52727e-06	InflammatoryMacs	Bin2
2.52672e-09	1.6394	0.328	0.129	5.2768e-05	InflammatoryMacs	Gm34084
4.52678e-09	1.54401	0.379	0.177	9.45373e-05	InflammatoryMacs	Phlda1
5.35769e-08	1.51603	0.397	0.205	0.0011189	InflammatoryMacs	Myo1e
1.72704e-44	4.74272	0.436	0.033	3.60674e-40	Trem2Macs	Mmp12
2.07221e-40	2.18105	0.709	0.104	4.3276e-36	Trem2Macs	Gngt2
4.51195e-35	3.21154	0.4	0.036	9.42276e-31	Trem2Macs	AA467197
5.26281e-33	3.59555	0.473	0.057	1.09908e-28	Trem2Macs	Itgax
5.58591e-30	2.46656	0.745	0.165	1.16656e-25	Trem2Macs	Lat2
1.03747e-29	3.53604	0.964	0.384	2.16666e-25	Trem2Macs	Lgals3
6.28769e-28	3.10451	0.745	0.195	1.31312e-23	Trem2Macs	Cd72
8.99158e-28	3.23673	0.455	0.063	1.8778e-23	Trem2Macs	Nes
6.54216e-27	2.04222	0.927	0.322	1.36626e-22	Trem2Macs	Cd9
4.41789e-24	3.35562	0.309	0.032	9.22632e-20	Trem2Macs	Il7r
5.3942e-24	3.35979	0.273	0.024	1.12653e-19	Trem2Macs	Sh2d1b1
6.83732e-24	3.06845	0.455	0.073	1.42791e-19	Trem2Macs	Zmynd15
1.36786e-23	2.08489	0.636	0.133	2.85664e-19	Trem2Macs	Slamf7
3.2341e-22	2.48457	0.691	0.187	6.7541e-18	Trem2Macs	Glipr1
6.14908e-21	1.82987	0.491	0.09	1.28417e-16	Trem2Macs	Xylt1
1.51704e-18	1.68603	0.491	0.097	3.16819e-14	Trem2Macs	Plaur
1.88893e-18	2.08238	0.509	0.109	3.94484e-14	Trem2Macs	Abcg1
6.40096e-18	3.02757	0.309	0.044	1.33678e-13	Trem2Macs	Apbb2
6.22912e-16	2.34334	0.382	0.073	1.30089e-11	Trem2Macs	Ppa1
1.27017e-15	1.65351	0.818	0.339	2.65262e-11	Trem2Macs	Lsp1
2.3848e-15	1.76054	0.8	0.359	4.98041e-11	Trem2Macs	Basp1
6.31778e-15	2.808	0.364	0.073	1.31941e-10	Trem2Macs	Acp5
8.56792e-15	2.64405	0.345	0.067	1.78932e-10	Trem2Macs	Pdgfb
1.76733e-14	1.86698	0.891	0.506	3.69089e-10	Trem2Macs	Hexb
2.30827e-14	2.21838	0.782	0.35	4.8206e-10	Trem2Macs	Aprt
2.71267e-14	2.07059	0.509	0.142	5.66515e-10	Trem2Macs	Lpl
3.2038e-14	1.52276	0.982	0.722	6.69083e-10	Trem2Macs	Fxyd5
4.8806e-14	1.56942	0.909	0.524	1.01926e-09	Trem2Macs	Ckb
5.27189e-14	1.59944	0.891	0.528	1.10098e-09	Trem2Macs	Cxcl16
5.6004e-14	2.0345	0.436	0.106	1.16959e-09	Trem2Macs	Pilra
1.00237e-13	1.96788	0.345	0.069	2.09335e-09	Trem2Macs	Arhgap24
5.04601e-13	2.54348	0.345	0.075	1.05381e-08	Trem2Macs	Cadm1
1.22742e-12	1.95321	0.382	0.088	2.56335e-08	Trem2Macs	Gadd45g
1.35882e-12	1.67863	0.764	0.389	2.83776e-08	Trem2Macs	Bcl2a1b
4.57508e-12	2.38934	0.309	0.063	9.55461e-08	Trem2Macs	F11r
1.62605e-11	1.60393	0.545	0.18	3.39584e-07	Trem2Macs	Pdlim7
1.80181e-11	1.76784	0.273	0.051	3.7629e-07	Trem2Macs	Fgr
2.58457e-11	1.64608	0.673	0.272	5.39762e-07	Trem2Macs	Id2
1.12108e-10	2.57147	0.309	0.072	2.34127e-06	Trem2Macs	Mmp14
1.2034e-10	1.67389	0.455	0.138	2.51318e-06	Trem2Macs	Scimp
1.61501e-10	2.06281	0.327	0.08	3.37278e-06	Trem2Macs	Speg
1.63629e-10	2.01789	0.309	0.069	3.41722e-06	Trem2Macs	Vipas39
2.36094e-10	1.98549	0.382	0.104	4.93058e-06	Trem2Macs	Tspan13
3.5133e-10	1.86874	0.455	0.137	7.33717e-06	Trem2Macs	Rilpl2
5.6438e-10	2.17265	0.255	0.052	1.17865e-05	Trem2Macs	Tle1
7.56909e-10	2.4051	0.273	0.061	1.58073e-05	Trem2Macs	Comtd1
1.36876e-09	1.95085	0.455	0.152	2.85852e-05	Trem2Macs	Cpd
1.57875e-09	1.70706	0.727	0.418	3.29705e-05	Trem2Macs	Capg
3.52225e-09	1.52209	0.873	0.735	7.35587e-05	Trem2Macs	Ms4a7
9.10701e-09	1.88582	0.345	0.101	0.000190191	Trem2Macs	Atp2b4
1.23727e-08	1.83034	0.327	0.091	0.000258391	Trem2Macs	Syt11
1.44384e-08	1.60991	0.291	0.073	0.000301532	Trem2Macs	B4galnt1
1.86128e-08	1.64107	0.491	0.181	0.000388711	Trem2Macs	Phlda1
2.60561e-08	5.13193	0.255	0.065	0.000544156	Trem2Macs	Fabp5
4.17713e-08	1.72314	0.418	0.144	0.000872351	Trem2Macs	Plp2
7.85303e-08	1.55821	0.273	0.07	0.00164003	Trem2Macs	Abtb2
9.75361e-08	1.66546	0.273	0.071	0.00203694	Trem2Macs	Dtx4
1.18342e-07	1.58197	0.473	0.188	0.00247145	Trem2Macs	Ccrl2
1.27791e-07	1.62812	0.291	0.081	0.0026688	Trem2Macs	Mthfd2
2.27893e-07	2.02406	0.309	0.098	0.00475931	Trem2Macs	Col4a2
3.99057e-07	1.90171	0.291	0.089	0.00833391	Trem2Macs	Map4k3
4.47977e-07	1.53202	0.291	0.085	0.00935554	Trem2Macs	Sema4d
5.00592e-07	1.56638	0.327	0.106	0.0104544	Trem2Macs	4930430E12Rik
5.41906e-07	1.97528	0.273	0.08	0.0113172	Trem2Macs	Mcm6
7.03921e-07	1.65237	0.273	0.08	0.0147007	Trem2Macs	Pcp4l1
2.59811e-06	1.82902	0.255	0.077	0.0542589	Trem2Macs	Fbxo32
2.98287e-06	1.51794	0.273	0.084	0.0622942	Trem2Macs	Topbp1
5.16733e-06	1.54151	0.255	0.078	0.107914	Trem2Macs	Gdpd3
1.45969e-05	1.58199	0.327	0.118	0.304842	Trem2Macs	Bin2
1.498e-05	1.99582	0.273	0.098	0.312843	Trem2Macs	Lmcd1
0.000233196	1.5483	0.291	0.125	1	Trem2Macs	Rcan2
0.000244365	1.59719	0.309	0.135	1	Trem2Macs	Fn1
0.000381238	1.76802	0.255	0.103	1	Trem2Macs	Tm7sf3
0.00098611	1.75234	0.273	0.126	1	Trem2Macs	Ltbp1
3.7957e-153	6.95797	0.857	0.007	7.92695e-149	Proliferating	Cdca3
4.03467e-129	7.1103	0.786	0.008	8.42601e-125	Proliferating	Rrm2
1.44667e-116	7.04151	0.643	0.005	3.02123e-112	Proliferating	Melk
1.5563e-112	6.46789	0.929	0.015	3.25017e-108	Proliferating	Knl1
6.94469e-111	6.46251	0.714	0.008	1.45033e-106	Proliferating	Pbk
4.971e-109	7.34728	0.5	0.003	1.03814e-104	Proliferating	Esco2
2.39768e-104	6.84312	0.571	0.004	5.00732e-100	Proliferating	Bub1
2.64013e-104	6.47469	0.929	0.017	5.51365e-100	Proliferating	Birc5
1.82104e-99	5.57956	0.857	0.015	3.80307e-95	Proliferating	Lockd
9.54608e-99	7.10563	0.714	0.01	1.9936e-94	Proliferating	Ccna2
6.02833e-98	6.56178	0.714	0.01	1.25896e-93	Proliferating	Kif11
2.77973e-96	6.98575	0.857	0.016	5.80518e-92	Proliferating	Nusap1
5.03258e-93	6.175	0.857	0.017	1.051e-88	Proliferating	Pclaf
1.03659e-89	5.98036	0.786	0.014	2.16481e-85	Proliferating	Spc24
1.00771e-86	6.22564	0.857	0.019	2.10451e-82	Proliferating	Prc1
1.22419e-86	6.05704	0.571	0.006	2.55659e-82	Proliferating	Spag5
6.04275e-86	6.89557	0.5	0.004	1.26197e-81	Proliferating	Ska1
3.35743e-85	6.24086	0.5	0.004	7.01165e-81	Proliferating	Pole
7.11977e-83	6.65764	0.643	0.01	1.48689e-78	Proliferating	Clspn
2.18559e-82	6.23094	0.571	0.007	4.56439e-78	Proliferating	Ccnb1
4.5463e-80	6.49009	0.429	0.003	9.49449e-76	Proliferating	Kifc1
6.8743e-78	5.99735	0.571	0.008	1.43563e-73	Proliferating	Nuf2
3.66335e-77	7.88403	0.357	0.002	7.65054e-73	Proliferating	E2f8
8.06199e-76	6.03545	0.929	0.027	1.68367e-71	Proliferating	Cdca8
9.02821e-75	6.58914	0.5	0.006	1.88545e-70	Proliferating	Kif20a
1.08322e-73	6.56085	0.429	0.004	2.26221e-69	Proliferating	E2f7
1.18035e-73	5.73094	0.714	0.015	2.46505e-69	Proliferating	Cenpe
4.04854e-73	6.08852	0.929	0.029	8.45497e-69	Proliferating	Top2a
6.36508e-71	6.63892	0.5	0.006	1.32928e-66	Proliferating	Sgo1
1.83711e-70	6.19764	0.5	0.006	3.83662e-66	Proliferating	Kif22
1.95484e-68	5.96637	0.643	0.013	4.08248e-64	Proliferating	Cenpf
1.95484e-68	6.16109	0.643	0.013	4.08248e-64	Proliferating	Ube2c
1.64141e-66	5.94122	0.5	0.007	3.42793e-62	Proliferating	Foxm1
3.08389e-64	5.49999	0.786	0.022	6.4404e-60	Proliferating	Cenpp
1.20162e-63	4.75306	0.929	0.033	2.50947e-59	Proliferating	Diaph3
2.69869e-63	6.22403	0.5	0.008	5.63594e-59	Proliferating	Neil3
4.11183e-63	5.9577	0.5	0.008	8.58715e-59	Proliferating	Kif15
6.95438e-63	5.66834	0.5	0.008	1.45235e-58	Proliferating	Cdc45
7.32921e-63	5.50983	0.5	0.008	1.53063e-58	Proliferating	Hist1h1b
3.37333e-61	4.98231	0.643	0.015	7.04486e-57	Proliferating	Ccnb2
3.80314e-60	5.91895	0.571	0.012	7.94247e-56	Proliferating	Cdkn3
2.51212e-59	5.28449	0.643	0.015	5.24632e-55	Proliferating	Cit
1.53781e-58	5.62958	0.429	0.006	3.21157e-54	Proliferating	Cep55
7.09041e-58	5.19944	0.643	0.016	1.48076e-53	Proliferating	Hist1h2ae
1.24917e-57	5.39782	0.643	0.016	2.60877e-53	Proliferating	Spc25
1.43749e-56	7.15738	0.286	0.002	3.00205e-52	Proliferating	Lrr1
2.40931e-56	5.41177	0.929	0.04	5.03161e-52	Proliferating	Mki67
5.26259e-56	6.84394	0.357	0.004	1.09904e-51	Proliferating	Ankle1
1.38424e-55	5.12774	0.643	0.017	2.89085e-51	Proliferating	Ckap2l
1.02466e-53	5.89104	0.571	0.013	2.1399e-49	Proliferating	Tk1
1.69638e-53	5.71209	0.643	0.018	3.54272e-49	Proliferating	Tpx2
1.92084e-53	5.41749	0.571	0.013	4.01148e-49	Proliferating	Rad51ap1
2.25416e-52	6.21031	0.5	0.01	4.70758e-48	Proliferating	Cdc20
5.67418e-52	6.06921	0.429	0.007	1.185e-47	Proliferating	Pimreg
1.86746e-51	6.52735	0.357	0.004	3.90001e-47	Proliferating	Mxd3
1.16609e-49	6.90531	0.286	0.003	2.43526e-45	Proliferating	Cdca5
1.87572e-46	5.82095	0.429	0.008	3.91724e-42	Proliferating	Hmmr
4.02564e-45	4.90757	1	0.062	8.40715e-41	Proliferating	Cks1b
2.22814e-44	5.1519	0.643	0.022	4.65325e-40	Proliferating	Asf1b
7.39773e-44	6.38745	0.786	0.037	1.54494e-39	Proliferating	Hist1h2ap
1.68225e-42	4.67252	0.571	0.018	3.51321e-38	Proliferating	Rad51
6.25332e-42	5.72564	0.429	0.01	1.30594e-37	Proliferating	Cenpm
8.30579e-42	5.43503	0.429	0.01	1.73458e-37	Proliferating	Ckap2
5.2667e-41	5.48939	0.357	0.006	1.0999e-36	Proliferating	Plk1
2.44877e-40	5.33366	0.571	0.02	5.114e-36	Proliferating	Aurkb
6.56146e-40	5.19671	0.429	0.01	1.3703e-35	Proliferating	Ccne2
1.84613e-39	4.81868	0.5	0.015	3.85546e-35	Proliferating	Uhrf1
3.28293e-39	5.34572	0.571	0.021	6.85607e-35	Proliferating	Cdk1
1.06397e-38	5.96614	0.357	0.007	2.222e-34	Proliferating	Ncapg
1.38957e-38	5.81892	0.357	0.007	2.90197e-34	Proliferating	Bard1
3.29557e-38	5.06868	0.429	0.011	6.88247e-34	Proliferating	Dlgap5
9.22195e-38	4.58223	0.643	0.027	1.92591e-33	Proliferating	Tacc3
3.91609e-37	4.97573	0.5	0.016	8.17836e-33	Proliferating	Bub1b
4.25889e-37	4.8665	0.714	0.036	8.89426e-33	Proliferating	Racgap1
2.82569e-36	6.485	0.286	0.004	5.90118e-32	Proliferating	Kif4
3.76468e-36	4.08932	0.929	0.066	7.86216e-32	Proliferating	Lmnb1
6.13309e-36	5.12473	0.357	0.008	1.28083e-31	Proliferating	Iqgap3
4.614e-34	4.37985	0.643	0.031	9.63588e-30	Proliferating	Cenpw
4.75854e-34	5.25795	0.357	0.008	9.93773e-30	Proliferating	Shcbp1
5.5525e-33	5.34084	0.286	0.005	1.15958e-28	Proliferating	Kif2c
3.17323e-32	4.71343	0.429	0.013	6.62697e-28	Proliferating	Aurka
4.76721e-31	4.43681	0.429	0.014	9.95584e-27	Proliferating	Atad5
2.1979e-30	5.07464	0.286	0.006	4.5901e-26	Proliferating	Brca1
5.28626e-30	3.78987	0.786	0.055	1.10398e-25	Proliferating	Nrm
6.41759e-29	4.87677	0.5	0.022	1.34025e-24	Proliferating	Lmnb2
1.03574e-28	4.67645	0.643	0.039	2.16304e-24	Proliferating	Mcm5
2.37886e-28	5.43241	0.286	0.006	4.968e-24	Proliferating	Ska3
6.1557e-28	4.93582	0.357	0.011	1.28556e-23	Proliferating	Cenpi
1.60271e-27	5.00452	0.429	0.017	3.34709e-23	Proliferating	Ncapd2
2.12848e-27	4.70882	0.5	0.024	4.44511e-23	Proliferating	Sdk1
4.95784e-27	5.6021	0.357	0.012	1.03539e-22	Proliferating	Ndc80
5.19669e-27	3.59202	0.929	0.088	1.08528e-22	Proliferating	Ezh2
9.72745e-26	4.65674	0.429	0.018	2.03148e-21	Proliferating	Rcc1
7.4045e-25	5.2062	0.286	0.008	1.54636e-20	Proliferating	Rad54l
1.3018e-24	4.51838	0.286	0.008	2.71869e-20	Proliferating	Fbxo5
3.07122e-24	3.88488	0.857	0.089	6.41393e-20	Proliferating	Smc2
1.4327e-23	4.65246	0.357	0.013	2.99206e-19	Proliferating	Cenpn
1.44473e-23	4.92023	0.429	0.021	3.01718e-19	Proliferating	Cenpq
2.40542e-23	4.82518	0.286	0.008	5.02347e-19	Proliferating	Arhgef39
1.08102e-22	3.66724	0.643	0.049	2.2576e-18	Proliferating	Kif23
5.96784e-22	3.9228	0.5	0.03	1.24632e-17	Proliferating	Cenps
2.08816e-21	5.33062	1	0.175	4.36091e-17	Proliferating	Stmn1
2.30053e-21	3.83693	0.714	0.066	4.80444e-17	Proliferating	Rrm1
2.63238e-21	4.25778	0.571	0.042	5.49747e-17	Proliferating	Gm42047
7.44219e-21	3.84554	0.429	0.022	1.55423e-16	Proliferating	Cenpk
5.52896e-20	3.52207	1	0.157	1.15467e-15	Proliferating	Smc4
1.14908e-19	4.24722	0.286	0.01	2.39974e-15	Proliferating	Mastl
2.1048e-19	3.61364	0.357	0.017	4.39567e-15	Proliferating	Wdhd1
2.22992e-19	3.69201	0.429	0.024	4.65697e-15	Proliferating	Kif20b
2.4013e-19	4.58075	0.357	0.017	5.01487e-15	Proliferating	Knstrn
3.19532e-19	4.32294	0.357	0.017	6.6731e-15	Proliferating	Brip1
6.62089e-19	3.22469	0.429	0.025	1.38271e-14	Proliferating	Spn
7.12943e-19	4.46147	0.286	0.011	1.48891e-14	Proliferating	Ube2t
8.14774e-19	4.31767	0.286	0.011	1.70157e-14	Proliferating	Cip2a
1.81884e-18	3.76098	1	0.177	3.79847e-14	Proliferating	Hmgn2
5.22421e-18	4.49684	0.286	0.012	1.09102e-13	Proliferating	Enkd1
7.26992e-18	3.91698	0.286	0.012	1.51825e-13	Proliferating	Msh5
8.78071e-18	3.66591	0.5	0.037	1.83376e-13	Proliferating	Tyms
3.55125e-17	4.04581	0.286	0.012	7.41643e-13	Proliferating	Ect2
7.75186e-16	4.35992	0.357	0.022	1.6189e-11	Proliferating	Mad2l1
1.21147e-15	3.69815	0.286	0.013	2.53004e-11	Proliferating	Mms22l
1.33703e-15	3.2695	0.714	0.089	2.79224e-11	Proliferating	Nt5dc2
1.62035e-15	3.05312	0.643	0.071	3.38394e-11	Proliferating	Mcm7
1.8176e-15	1.98744	0.429	0.031	3.79588e-11	Proliferating	Spp1
2.7878e-15	3.1128	0.5	0.042	5.82204e-11	Proliferating	Rfc5
5.57876e-15	3.91531	0.714	0.099	1.16507e-10	Proliferating	Dut
1.13593e-14	3.06642	0.571	0.059	2.37228e-10	Proliferating	Anln
1.37935e-14	3.31077	0.5	0.046	2.88063e-10	Proliferating	Nup155
2.07237e-14	2.87666	0.714	0.091	4.32793e-10	Proliferating	Dnajc9
2.47636e-14	3.66462	0.357	0.024	5.17164e-10	Proliferating	Pkmyt1
3.54954e-14	3.3254	0.357	0.024	7.41285e-10	Proliferating	Slfn9
4.90324e-14	2.99473	0.714	0.096	1.02399e-09	Proliferating	Lig1
5.308e-14	3.3893	0.429	0.035	1.10852e-09	Proliferating	Cdca4
8.93616e-14	2.795	0.714	0.098	1.86623e-09	Proliferating	AI506816
1.04596e-13	3.13408	0.5	0.048	2.18438e-09	Proliferating	Pold2
1.05524e-13	3.69783	0.786	0.138	2.20377e-09	Proliferating	Cks2
1.18565e-13	3.14094	0.643	0.083	2.47612e-09	Proliferating	Atad2
1.40023e-13	3.44001	0.429	0.037	2.92424e-09	Proliferating	Alg8
1.83452e-13	3.14598	0.429	0.036	3.83122e-09	Proliferating	Ndc1
2.13429e-13	3.95747	0.357	0.026	4.45726e-09	Proliferating	Hells
2.21057e-13	3.56959	0.786	0.137	4.61656e-09	Proliferating	Cenpa
2.76886e-13	3.95168	0.286	0.017	5.78249e-09	Proliferating	Rai14
3.39493e-13	3.81407	0.286	0.017	7.08998e-09	Proliferating	Blm
4.1465e-13	3.76548	0.429	0.039	8.65955e-09	Proliferating	Coro2a
5.14384e-13	2.98727	0.429	0.037	1.07424e-08	Proliferating	Rbl1
5.66352e-13	4.55704	0.286	0.017	1.18277e-08	Proliferating	Hmgb3
5.76865e-13	3.16854	0.5	0.052	1.20472e-08	Proliferating	Ncapd3
7.14839e-13	3.0108	0.429	0.038	1.49287e-08	Proliferating	Hist1h4d
7.71795e-13	2.59113	0.857	0.156	1.61182e-08	Proliferating	Sae1
8.90685e-13	3.27347	0.429	0.039	1.86011e-08	Proliferating	Rad18
8.9325e-13	2.54211	0.857	0.148	1.86546e-08	Proliferating	Plp2
1.4244e-12	3.20061	0.429	0.039	2.97472e-08	Proliferating	Haus1
2.59895e-12	3.56585	0.357	0.028	5.42765e-08	Proliferating	Fen1
2.93949e-12	3.20474	0.571	0.075	6.13884e-08	Proliferating	Rpa2
3.58643e-12	2.5568	0.714	0.107	7.4899e-08	Proliferating	Ddx39
3.80108e-12	2.9612	0.429	0.04	7.93818e-08	Proliferating	Alg6
4.72047e-12	2.51858	0.786	0.131	9.85824e-08	Proliferating	Ccdc34
6.48986e-12	3.07284	0.357	0.029	1.35534e-07	Proliferating	Ppp1r8
9.07668e-12	3.07683	0.571	0.075	1.89557e-07	Proliferating	Arhgap11a
1.01479e-11	2.42398	0.857	0.168	2.1193e-07	Proliferating	Lsm2
1.95208e-11	2.73149	0.571	0.073	4.07672e-07	Proliferating	Mis18a
1.99559e-11	3.55904	0.571	0.079	4.16759e-07	Proliferating	Incenp
2.33907e-11	2.75529	1	0.29	4.88492e-07	Proliferating	Tubb4b
4.77622e-11	3.49695	1	0.57	9.97465e-07	Proliferating	Hmgb2
5.04307e-11	2.15304	0.857	0.159	1.0532e-06	Proliferating	Ncaph2
5.87738e-11	3.60233	0.286	0.021	1.22743e-06	Proliferating	Plk4
8.21583e-11	3.32961	0.286	0.021	1.71579e-06	Proliferating	Chaf1b
1.1368e-10	2.63036	0.571	0.08	2.3741e-06	Proliferating	Tfdp1
1.30067e-10	3.15665	0.357	0.033	2.71633e-06	Proliferating	Ncapg2
1.64743e-10	3.40216	1	0.56	3.4405e-06	Proliferating	Tubb5
1.70772e-10	2.44836	0.571	0.078	3.5664e-06	Proliferating	Xrcc1
1.97255e-10	2.52682	0.429	0.046	4.11948e-06	Proliferating	Aaas
2.67332e-10	2.4943	0.571	0.082	5.58297e-06	Proliferating	Cep128
3.88764e-10	2.36862	1	0.899	8.11896e-06	Proliferating	H2afz
3.93661e-10	2.54759	0.357	0.033	8.22121e-06	Proliferating	Mbd4
4.58814e-10	2.96352	0.357	0.035	9.58188e-06	Proliferating	Nptxr
4.67831e-10	2.6088	0.929	0.298	9.77017e-06	Proliferating	Anp32e
4.99719e-10	3.24517	0.286	0.022	1.04361e-05	Proliferating	Aplf
7.12862e-10	2.37605	0.786	0.164	1.48874e-05	Proliferating	Erh
8.01777e-10	3.45065	0.357	0.037	1.67443e-05	Proliferating	Mcm2
8.32567e-10	2.73595	0.643	0.112	1.73873e-05	Proliferating	Rangap1
8.54436e-10	2.42742	0.714	0.139	1.7844e-05	Proliferating	Pola1
1.04319e-09	3.03585	0.786	0.206	2.17861e-05	Proliferating	Tmpo
1.4367e-09	2.60223	0.429	0.05	3.00039e-05	Proliferating	Haus4
1.59173e-09	2.69053	0.571	0.088	3.32418e-05	Proliferating	Reep4
1.65193e-09	3.04449	0.357	0.037	3.44989e-05	Proliferating	Pold1
1.72938e-09	2.69764	0.571	0.092	3.61165e-05	Proliferating	Mcm3
1.73814e-09	2.18011	1	0.756	3.62993e-05	Proliferating	Hmgb1
1.86827e-09	2.05905	0.643	0.105	3.90169e-05	Proliferating	Hdac4
2.17839e-09	3.41756	0.286	0.024	4.54935e-05	Proliferating	Slc35d2
2.48292e-09	2.37769	1	0.518	5.18533e-05	Proliferating	Ran
2.68295e-09	2.21494	1	0.412	5.60308e-05	Proliferating	Nucks1
2.78702e-09	3.19731	0.286	0.024	5.82042e-05	Proliferating	Lancl2
2.78702e-09	3.13107	0.286	0.024	5.82042e-05	Proliferating	Dnph1
2.93329e-09	3.10902	0.429	0.055	6.12588e-05	Proliferating	Gmnn
3.27122e-09	2.49237	0.643	0.121	6.83161e-05	Proliferating	Pmf1
3.55245e-09	2.48215	0.714	0.15	7.41893e-05	Proliferating	Cbx5
3.86246e-09	2.90486	1	0.561	8.06637e-05	Proliferating	Tuba1b
4.11891e-09	2.72108	0.5	0.073	8.60194e-05	Proliferating	Mis12
4.90316e-09	2.33239	0.857	0.212	0.000102398	Proliferating	Selenoh
5.42159e-09	3.93415	0.286	0.026	0.000113224	Proliferating	Psat1
6.06729e-09	3.34886	0.286	0.026	0.000126709	Proliferating	Nup37
8.13176e-09	3.92396	0.286	0.027	0.000169824	Proliferating	Fdft1
9.60248e-09	2.22178	0.5	0.072	0.000200538	Proliferating	Alg13
1.1284e-08	2.11481	0.929	0.271	0.000235654	Proliferating	Anapc5
1.13594e-08	2.54217	0.643	0.124	0.000237231	Proliferating	Dnmt1
1.14137e-08	2.66081	0.357	0.04	0.000238363	Proliferating	Gstcd
1.19938e-08	2.40533	0.429	0.055	0.000250479	Proliferating	Mdc1
1.25892e-08	2.98939	0.929	0.484	0.000262912	Proliferating	H2afv
1.27766e-08	2.28874	0.5	0.075	0.000266826	Proliferating	Cdc27
1.33549e-08	2.22703	0.5	0.073	0.000278903	Proliferating	Usp39
1.37027e-08	2.21776	0.5	0.073	0.000286166	Proliferating	Naa40
1.42027e-08	2.34594	0.429	0.056	0.000296609	Proliferating	Rnf26
1.46831e-08	2.82343	0.357	0.041	0.000306643	Proliferating	Cgas
2.07564e-08	2.53946	0.571	0.101	0.000433477	Proliferating	Pcnt
2.15008e-08	2.44085	0.5	0.08	0.000449022	Proliferating	Cdkn2d
2.18913e-08	2.11732	1	0.588	0.000457178	Proliferating	Dek
2.23827e-08	2.78406	0.357	0.042	0.000467441	Proliferating	Ulbp1
2.4908e-08	2.6406	0.5	0.08	0.000520179	Proliferating	Myef2
2.91097e-08	3.31038	0.286	0.028	0.000607926	Proliferating	Kcnn4
3.509e-08	2.48814	0.571	0.106	0.00073282	Proliferating	Cntln
3.62491e-08	2.71984	0.429	0.062	0.000757026	Proliferating	Ccdc15
4.17716e-08	2.64609	0.286	0.028	0.000872359	Proliferating	Ska2
5.56319e-08	3.18764	0.286	0.03	0.00116182	Proliferating	Mrps2
5.67259e-08	2.40782	0.5	0.081	0.00118466	Proliferating	Jpt2
6.13617e-08	3.08039	0.286	0.03	0.00128148	Proliferating	Trim59
6.16305e-08	2.8821	0.357	0.045	0.00128709	Proliferating	Trim37
6.34245e-08	2.23818	1	0.561	0.00132456	Proliferating	Anp32b
6.40275e-08	2.28222	0.429	0.06	0.00133715	Proliferating	Def6
6.41602e-08	1.72229	1	0.517	0.00133992	Proliferating	Calm3
7.15952e-08	2.8417	0.5	0.082	0.00149519	Proliferating	Nde1
7.32123e-08	1.83066	1	0.978	0.00152896	Proliferating	Ptma
7.39128e-08	2.50179	0.5	0.083	0.0015436	Proliferating	Mcm6
7.47353e-08	2.28145	0.786	0.237	0.00156077	Proliferating	Pa2g4
7.62451e-08	2.17068	0.571	0.104	0.0015923	Proliferating	Hdgfl2
9.15296e-08	2.89869	0.286	0.03	0.0019115	Proliferating	Telo2
9.30477e-08	1.8204	0.714	0.148	0.00194321	Proliferating	Hat1
1.00627e-07	1.81379	0.929	0.478	0.0021015	Proliferating	Hnrnpab
1.08051e-07	1.8531	0.857	0.247	0.00225654	Proliferating	Lsm5
1.30878e-07	2.30961	1	0.437	0.00273326	Proliferating	Ube2s
1.45885e-07	2.97872	0.286	0.031	0.00304666	Proliferating	Prim1
1.45903e-07	2.14069	0.571	0.11	0.00304705	Proliferating	Usp1
1.47359e-07	1.72759	1	0.807	0.00307744	Proliferating	Tagln2
1.48074e-07	2.22831	0.714	0.178	0.00309238	Proliferating	Hpf1
1.50968e-07	2.68939	0.714	0.21	0.00315281	Proliferating	Dctpp1
1.51792e-07	2.42619	0.5	0.087	0.00317002	Proliferating	Topbp1
1.83153e-07	2.81327	0.286	0.031	0.00382497	Proliferating	Sh2d1b1
1.97572e-07	2.62112	0.643	0.152	0.00412609	Proliferating	Dtymk
2.01414e-07	1.64039	1	0.621	0.00420633	Proliferating	Snrpe
2.07164e-07	3.09243	0.5	0.1	0.0043264	Proliferating	H2afx
2.18587e-07	1.64522	0.857	0.224	0.00456497	Proliferating	Mrps18c
2.24997e-07	1.95542	0.571	0.11	0.00469883	Proliferating	Nav2
2.44089e-07	2.3838	0.857	0.324	0.00509754	Proliferating	Snrpd1
2.57827e-07	2.55151	0.643	0.143	0.00538446	Proliferating	Cmc2
2.7842e-07	2.24932	0.643	0.148	0.00581453	Proliferating	Psip1
2.80441e-07	2.42266	0.5	0.089	0.00585673	Proliferating	Nsd2
2.80633e-07	1.69515	0.929	0.313	0.00586074	Proliferating	Cbx3
3.27773e-07	2.19215	0.5	0.088	0.00684522	Proliferating	Eftud2
3.58825e-07	3.08741	0.357	0.05	0.0074937	Proliferating	G2e3
3.70484e-07	1.85817	0.929	0.292	0.00773718	Proliferating	Banf1
3.74943e-07	1.90382	0.857	0.269	0.00783031	Proliferating	Bub3
3.88042e-07	2.34243	0.429	0.067	0.00810388	Proliferating	Tmem97
4.08768e-07	2.06017	0.429	0.066	0.00853672	Proliferating	Rfwd3
4.47966e-07	1.96821	0.857	0.256	0.00935531	Proliferating	Ssrp1
4.88441e-07	2.76087	0.286	0.033	0.0102006	Proliferating	Hdac6
4.92888e-07	2.4364	0.357	0.049	0.0102935	Proliferating	Tubg1
5.1849e-07	2.1529	0.786	0.242	0.0108282	Proliferating	Rad21
5.38407e-07	1.78672	0.643	0.138	0.0112441	Proliferating	Ezr
5.77075e-07	1.80987	0.643	0.136	0.0120516	Proliferating	2310009B15Rik
6.0772e-07	2.71878	0.357	0.051	0.0126916	Proliferating	Rfc4
6.08735e-07	1.5924	0.714	0.159	0.0127128	Proliferating	Pak1ip1
6.63371e-07	1.93905	0.643	0.148	0.0138538	Proliferating	Bcap29
6.80541e-07	1.75951	0.643	0.141	0.0142124	Proliferating	Srpk1
8.33508e-07	1.59917	0.929	0.489	0.017407	Proliferating	Tpm4
9.34341e-07	1.8059	0.929	0.361	0.0195128	Proliferating	Nudc
9.36622e-07	1.88068	0.857	0.342	0.0195604	Proliferating	Lsm6
1.03582e-06	1.71698	0.857	0.29	0.0216321	Proliferating	Cbx1
1.14056e-06	2.2188	0.5	0.098	0.0238194	Proliferating	Haus8
1.17961e-06	2.28349	0.357	0.051	0.024635	Proliferating	Tbc1d31
1.18873e-06	2.65327	0.286	0.035	0.0248254	Proliferating	Nudcd1
1.19484e-06	1.70387	0.714	0.168	0.0249531	Proliferating	Cd180
1.27148e-06	1.74134	0.857	0.245	0.0265536	Proliferating	Lbr
1.43224e-06	2.1215	0.429	0.073	0.0299109	Proliferating	Aimp2
1.62807e-06	2.26097	0.429	0.073	0.0340006	Proliferating	Brf1
1.66789e-06	1.99271	0.571	0.121	0.0348323	Proliferating	Tmx2
1.71594e-06	2.75693	0.286	0.036	0.0358358	Proliferating	Recql
1.72082e-06	1.92239	0.929	0.453	0.0359377	Proliferating	Ranbp1
1.75633e-06	2.28612	0.286	0.035	0.0366792	Proliferating	Ada
1.86068e-06	1.96376	0.5	0.098	0.0388584	Proliferating	Klhdc10
1.91432e-06	1.87364	0.857	0.297	0.0399786	Proliferating	Mrpl51
1.93065e-06	3.25638	0.286	0.038	0.0403196	Proliferating	Nup35
2.23431e-06	2.02505	0.5	0.1	0.0466613	Proliferating	Cep83
2.29863e-06	2.68968	0.286	0.037	0.0480045	Proliferating	Galnt12
2.38905e-06	2.09645	0.643	0.162	0.0498928	Proliferating	Parp1
2.42168e-06	2.26157	0.286	0.037	0.0505745	Proliferating	Impa2
2.44817e-06	1.8089	0.786	0.236	0.0511276	Proliferating	Dpy30
2.7313e-06	1.66471	0.857	0.239	0.0570405	Proliferating	Nsmce1
2.82662e-06	2.23756	0.571	0.131	0.0590312	Proliferating	Npm3
2.84845e-06	2.7344	0.286	0.037	0.059487	Proliferating	Pola2
2.93604e-06	2.31618	0.5	0.104	0.0613162	Proliferating	Erg28
3.1015e-06	1.64939	0.857	0.32	0.0647717	Proliferating	Bcas2
3.14189e-06	2.90188	0.286	0.038	0.0656153	Proliferating	Gins2
3.34729e-06	1.5262	1	0.535	0.0699049	Proliferating	Hmgn1
3.38559e-06	1.91771	1	0.714	0.0707047	Proliferating	Arl6ip1
3.47811e-06	2.04847	0.286	0.037	0.0726369	Proliferating	Gpr84
3.56669e-06	2.38066	0.429	0.082	0.0744867	Proliferating	Prim2
3.91093e-06	1.86237	0.5	0.101	0.0816759	Proliferating	Cep57
4.14714e-06	2.60975	0.286	0.038	0.0866089	Proliferating	Pak4
4.15567e-06	1.69517	1	0.583	0.086787	Proliferating	Nap1l1
4.24542e-06	1.80308	0.429	0.076	0.0886614	Proliferating	Ints9
4.25041e-06	2.91821	0.357	0.06	0.0887655	Proliferating	Espl1
4.32014e-06	1.8444	0.714	0.195	0.0902219	Proliferating	Strap
4.36826e-06	2.52583	0.357	0.057	0.0912268	Proliferating	Hirip3
4.41779e-06	1.6933	0.857	0.312	0.0922612	Proliferating	Fundc2
5.2275e-06	1.93355	0.714	0.2	0.109171	Proliferating	Glipr1
5.32181e-06	1.80411	0.714	0.224	0.111141	Proliferating	Rnps1
6.32747e-06	1.91599	0.786	0.315	0.132143	Proliferating	Smchd1
6.33672e-06	2.44985	0.286	0.039	0.132336	Proliferating	Slc16a14
6.36019e-06	1.9814	0.429	0.08	0.132826	Proliferating	Alg14
6.56016e-06	2.56493	0.286	0.04	0.137002	Proliferating	Haus6
6.68135e-06	1.74993	0.643	0.17	0.139533	Proliferating	Exosc8
6.78389e-06	2.0305	0.571	0.139	0.141675	Proliferating	Nolc1
6.82742e-06	1.58023	0.429	0.076	0.142584	Proliferating	Mogs
6.99389e-06	1.85124	0.786	0.238	0.14606	Proliferating	Aco2
7.15228e-06	2.42591	0.286	0.039	0.149368	Proliferating	Cdc25b
7.27772e-06	1.52173	0.857	0.289	0.151988	Proliferating	Cdk4
7.7229e-06	2.19526	0.786	0.295	0.161285	Proliferating	Pcna
7.76673e-06	1.64973	0.714	0.199	0.1622	Proliferating	Pds5a
8.41947e-06	2.22115	0.357	0.059	0.175832	Proliferating	Orc6
8.49328e-06	2.2757	0.429	0.083	0.177374	Proliferating	Tipin
8.7686e-06	1.55837	0.929	0.429	0.183124	Proliferating	Raly
9.07392e-06	1.88981	0.357	0.058	0.1895	Proliferating	Gmcl1
9.09552e-06	2.49799	0.357	0.062	0.189951	Proliferating	Nedd1
9.91155e-06	1.74959	0.5	0.103	0.206993	Proliferating	Gins4
1.01298e-05	2.24495	0.429	0.085	0.211551	Proliferating	Ppih
1.06051e-05	1.80606	0.429	0.08	0.221477	Proliferating	Ciapin1
1.07451e-05	2.59268	0.286	0.041	0.224402	Proliferating	Btf3l4
1.07749e-05	2.82158	0.286	0.042	0.225023	Proliferating	Grpel2
1.12251e-05	1.83823	1	0.603	0.234425	Proliferating	Jpt1
1.1831e-05	1.57513	0.786	0.26	0.247079	Proliferating	Rbbp7
1.20418e-05	1.57031	0.929	0.556	0.251482	Proliferating	Set
1.23752e-05	2.51716	0.286	0.042	0.258444	Proliferating	Grhpr
1.24622e-05	2.4392	0.286	0.042	0.260261	Proliferating	Cep70
1.36484e-05	2.0207	0.5	0.114	0.285033	Proliferating	Cdkn2aipnl
1.43672e-05	2.65198	0.571	0.159	0.300045	Proliferating	Cpd
1.43737e-05	2.70007	0.357	0.065	0.300181	Proliferating	Rfc3
1.45028e-05	2.19311	0.429	0.087	0.302877	Proliferating	Rnaseh2a
1.46963e-05	1.80686	0.357	0.06	0.306919	Proliferating	Trp53cor1
1.61834e-05	1.61827	0.929	0.419	0.337975	Proliferating	Vdac3
1.64985e-05	1.5324	0.786	0.267	0.344555	Proliferating	Thoc7
1.68875e-05	1.65922	0.429	0.083	0.352678	Proliferating	Cep290
1.89478e-05	1.70735	0.643	0.184	0.395705	Proliferating	Suz12
1.95802e-05	1.60551	0.714	0.225	0.408912	Proliferating	Taf15
2.01118e-05	1.69047	0.857	0.401	0.420015	Proliferating	Hdgf
2.09581e-05	1.61795	0.643	0.175	0.437689	Proliferating	Trim28
2.23376e-05	1.81056	0.714	0.256	0.466499	Proliferating	Magoh
2.27689e-05	1.64344	0.714	0.22	0.475506	Proliferating	Cnih1
2.33516e-05	2.10044	0.286	0.042	0.487675	Proliferating	Zbed4
2.36732e-05	1.80544	0.714	0.262	0.494391	Proliferating	Alyref
2.47655e-05	2.0097	0.286	0.042	0.517203	Proliferating	Trpm2
2.47898e-05	1.8639	0.5	0.119	0.51771	Proliferating	Gabpb2
2.72838e-05	2.54025	0.286	0.044	0.569794	Proliferating	Pan2
2.92721e-05	2.9002	0.286	0.046	0.611319	Proliferating	Rhno1
2.99467e-05	1.68238	0.714	0.221	0.625408	Proliferating	Cbfb
3.0659e-05	1.80822	0.571	0.149	0.640282	Proliferating	Upf3a
3.1078e-05	2.57486	0.286	0.046	0.649033	Proliferating	Cep57l1
3.13028e-05	1.8384	0.5	0.119	0.653727	Proliferating	Aarsd1
3.18999e-05	1.72566	0.929	0.388	0.666197	Proliferating	Prdx4
3.23413e-05	2.22865	0.357	0.069	0.675415	Proliferating	F11r
3.37896e-05	1.75399	0.5	0.122	0.705662	Proliferating	Lrrc8c
3.60455e-05	2.22788	0.429	0.094	0.752775	Proliferating	Gm49336
3.70316e-05	1.83325	0.286	0.044	0.773369	Proliferating	Slc2a3
4.05205e-05	1.62819	0.5	0.115	0.84623	Proliferating	0610010F05Rik
4.1027e-05	1.95562	0.429	0.093	0.856807	Proliferating	Map4k3
4.10941e-05	1.53651	0.714	0.213	0.858209	Proliferating	Polr2m
4.2069e-05	1.65964	0.429	0.088	0.878569	Proliferating	Mad1l1
4.24218e-05	2.41909	0.357	0.071	0.885938	Proliferating	Hjurp
4.33999e-05	1.77415	0.857	0.389	0.906364	Proliferating	Cdkn1a
4.5631e-05	2.17447	0.429	0.095	0.952958	Proliferating	Cdkn2c
4.68019e-05	1.83502	0.5	0.12	0.977411	Proliferating	Actl6a
4.74925e-05	2.40976	0.286	0.046	0.991833	Proliferating	Sinhcaf
4.85469e-05	2.07964	0.429	0.096	1	Proliferating	Syt11
4.89995e-05	2.40858	0.357	0.075	1	Proliferating	Nes
4.94247e-05	2.21613	0.429	0.091	1	Proliferating	Gm43305
5.11955e-05	1.63256	0.429	0.089	1	Proliferating	Gmeb2
5.69648e-05	2.41288	0.286	0.047	1	Proliferating	Prps1
5.81106e-05	2.05071	0.357	0.068	1	Proliferating	Pop4
5.82267e-05	2.16283	0.286	0.046	1	Proliferating	Adap1
6.38391e-05	2.19923	0.286	0.047	1	Proliferating	Slf1
6.95466e-05	1.83955	0.5	0.125	1	Proliferating	Eri1
7.31305e-05	2.18706	0.286	0.048	1	Proliferating	Rbmx2
7.38875e-05	1.96964	0.429	0.098	1	Proliferating	Rnaseh2b
7.47317e-05	2.7526	0.286	0.051	1	Proliferating	Gdf15
7.56387e-05	1.80557	0.286	0.047	1	Proliferating	Glipr2
7.67705e-05	1.56643	0.714	0.281	1	Proliferating	Ubald2
7.77979e-05	1.72516	0.357	0.068	1	Proliferating	Zfp68
7.90399e-05	1.76663	0.643	0.204	1	Proliferating	Paics
8.07954e-05	2.75779	0.286	0.05	1	Proliferating	Mcm4
8.22597e-05	1.51287	0.643	0.197	1	Proliferating	Msl3
8.28949e-05	1.9635	0.5	0.134	1	Proliferating	Gpaa1
8.70698e-05	2.70543	0.286	0.051	1	Proliferating	Nmral1
8.73026e-05	1.92243	0.286	0.048	1	Proliferating	Fancc
9.26674e-05	1.98196	0.643	0.211	1	Proliferating	Stip1
9.34005e-05	1.50268	0.786	0.259	1	Proliferating	Ssna1
9.41587e-05	1.6608	0.357	0.071	1	Proliferating	Mapk8
9.69092e-05	2.12462	0.286	0.048	1	Proliferating	Tasp1
0.000102329	1.96037	0.357	0.071	1	Proliferating	Cdk5rap2
0.000103828	1.63232	0.643	0.208	1	Proliferating	Rcc2
0.000104966	1.52729	0.714	0.24	1	Proliferating	Mrpl18
0.000105939	2.01285	0.286	0.049	1	Proliferating	Kri1
0.000113966	2.82258	0.286	0.053	1	Proliferating	Cdc23
0.000123603	1.94987	0.571	0.187	1	Proliferating	Rdm1
0.000124234	1.86754	0.357	0.073	1	Proliferating	Nup50
0.000126949	2.86676	0.286	0.055	1	Proliferating	Phlda3
0.000128176	1.96854	0.357	0.075	1	Proliferating	Ss18l2
0.000131053	2.04029	0.286	0.049	1	Proliferating	Snx7
0.000133733	1.87329	0.357	0.073	1	Proliferating	Elp2
0.000134206	2.21771	0.571	0.189	1	Proliferating	Pdlim7
0.000136708	1.6073	0.714	0.299	1	Proliferating	Syncrip
0.000137287	1.63055	0.643	0.199	1	Proliferating	Mrpl13
0.000137776	1.60436	0.429	0.1	1	Proliferating	Snrnp25
0.000146042	2.0196	0.286	0.05	1	Proliferating	Ahi1
0.000152721	1.74403	0.5	0.134	1	Proliferating	Sf3a3
0.000158255	1.8572	0.286	0.05	1	Proliferating	Acap3
0.000158807	1.58081	0.786	0.309	1	Proliferating	Smc1a
0.000166239	1.97133	0.429	0.109	1	Proliferating	Fam129b
0.000175551	1.85967	0.429	0.107	1	Proliferating	Nip7
0.00017571	2.12268	0.357	0.079	1	Proliferating	Capn7
0.000180446	1.78287	0.429	0.105	1	Proliferating	Snrnp35
0.000193209	1.76832	0.5	0.137	1	Proliferating	Ckap5
0.000196478	2.37179	0.357	0.078	1	Proliferating	Tjap1
0.000204087	1.89436	0.643	0.24	1	Proliferating	Siva1
0.000217783	1.78829	0.571	0.188	1	Proliferating	Nop56
0.000218564	1.7786	0.357	0.076	1	Proliferating	Mrpl10
0.000229276	1.84348	0.357	0.078	1	Proliferating	Gm34589
0.000229994	1.68769	0.5	0.141	1	Proliferating	Ctnnbl1
0.000230355	2.17682	0.357	0.082	1	Proliferating	Cep295
0.000231737	2.40778	0.286	0.055	1	Proliferating	Sephs1
0.000240626	2.22141	0.286	0.053	1	Proliferating	Nup188
0.000240667	1.55928	0.357	0.075	1	Proliferating	Ppp2r5d
0.000248491	1.63749	0.5	0.141	1	Proliferating	Ccdc82
0.000252638	1.6196	0.571	0.184	1	Proliferating	Mif4gd
0.000254682	1.6037	0.429	0.103	1	Proliferating	Uxt
0.000256613	1.83132	0.357	0.078	1	Proliferating	Sept10
0.000271514	2.20551	0.357	0.081	1	Proliferating	0610040B10Rik
0.000276152	1.56003	0.571	0.183	1	Proliferating	Cnot6
0.000278493	1.56479	0.714	0.24	1	Proliferating	Psmb7
0.000284026	1.59301	0.357	0.076	1	Proliferating	Cfap20
0.000284516	2.38434	0.286	0.057	1	Proliferating	Gm49980
0.000286745	2.16808	0.286	0.055	1	Proliferating	Thoc5
0.000303608	1.93922	0.286	0.054	1	Proliferating	Rbm15
0.000309516	1.59808	0.429	0.106	1	Proliferating	Slc20a1
0.000313232	1.56809	0.357	0.077	1	Proliferating	Btbd10
0.000317763	1.78086	0.286	0.053	1	Proliferating	Ccdc71
0.000320698	1.73223	0.357	0.078	1	Proliferating	Dck
0.000327463	1.66808	0.429	0.108	1	Proliferating	Ppa2
0.000338389	1.69955	0.286	0.054	1	Proliferating	H2-Ob
0.00035406	1.50566	0.643	0.224	1	Proliferating	Nudt21
0.000356653	1.8742	0.357	0.08	1	Proliferating	Mrpl46
0.000369741	1.8713	0.357	0.082	1	Proliferating	Eefsec
0.000371612	1.83612	0.286	0.055	1	Proliferating	Alas1
0.000379183	1.60508	0.357	0.078	1	Proliferating	Ccdc167
0.000382694	1.65458	0.429	0.109	1	Proliferating	Med30
0.000387133	1.82554	0.286	0.055	1	Proliferating	Pctp
0.000390579	1.84629	0.357	0.083	1	Proliferating	Adamts10
0.000399532	1.53706	0.357	0.078	1	Proliferating	Jade1
0.000404049	1.78931	0.286	0.055	1	Proliferating	Cep192
0.00040497	2.55262	0.286	0.057	1	Proliferating	Ints14
0.000411987	1.70807	0.5	0.14	1	Proliferating	Bckdk
0.000419339	1.90618	0.5	0.149	1	Proliferating	Bicd2
0.000423085	1.87296	0.286	0.057	1	Proliferating	Zmat3
0.000424284	1.79764	0.357	0.082	1	Proliferating	Frmd8
0.000444647	1.57855	0.5	0.141	1	Proliferating	Ppp1r7
0.000448824	1.62563	0.286	0.056	1	Proliferating	Elp1
0.000449231	2.18581	0.286	0.057	1	Proliferating	Ppp2r1b
0.000479152	1.79225	0.357	0.082	1	Proliferating	Nxt1
0.000514865	1.61775	0.429	0.112	1	Proliferating	Pold3
0.000535281	1.66831	0.429	0.116	1	Proliferating	Dicer1
0.000581596	1.54568	0.571	0.184	1	Proliferating	Agap1
0.000581693	1.65195	0.429	0.116	1	Proliferating	Rif1
0.000597893	1.61496	0.5	0.156	1	Proliferating	Xpo1
0.000611935	1.92561	0.357	0.086	1	Proliferating	Tex30
0.000612381	1.92395	0.286	0.059	1	Proliferating	Ubr7
0.000612381	1.99604	0.286	0.059	1	Proliferating	Slc39a6
0.000613862	1.70415	0.286	0.057	1	Proliferating	Zdhhc16
0.000619014	1.52745	0.643	0.235	1	Proliferating	Cox20
0.000649303	1.9935	0.357	0.091	1	Proliferating	Synj2
0.000657054	1.81087	0.357	0.088	1	Proliferating	Stx3
0.000659595	1.67639	0.357	0.086	1	Proliferating	Mthfd2
0.000671494	1.88583	0.286	0.06	1	Proliferating	Zhx3
0.000672842	1.80938	0.286	0.059	1	Proliferating	P2ry10b
0.000677488	1.79213	0.286	0.058	1	Proliferating	Rbm10
0.000680106	2.12089	0.357	0.094	1	Proliferating	Bend6
0.000712837	1.79305	0.357	0.087	1	Proliferating	Ftsj3
0.000732915	1.7017	0.429	0.119	1	Proliferating	Larp1b
0.000750378	1.71379	0.286	0.059	1	Proliferating	Nufip1
0.000785816	1.54115	0.643	0.243	1	Proliferating	Matr3
0.000799239	1.52194	0.571	0.207	1	Proliferating	Sept11
0.000837622	2.08685	0.286	0.062	1	Proliferating	Slc25a25
0.000859233	1.98497	0.357	0.092	1	Proliferating	Mmadhc
0.000863839	1.87653	0.429	0.121	1	Proliferating	Snrnp40
0.000887493	1.56454	0.286	0.06	1	Proliferating	BC052040
0.000931947	1.52003	0.5	0.161	1	Proliferating	Prkd3
0.000943481	1.87302	0.286	0.064	1	Proliferating	Olfml3
0.000964172	1.53465	0.429	0.118	1	Proliferating	Eif1ad
0.00101226	1.71135	0.286	0.062	1	Proliferating	Dhx57
0.00102316	1.94718	0.357	0.092	1	Proliferating	Syce2
0.00105279	1.60578	0.357	0.088	1	Proliferating	Sash3
0.00105934	1.97066	0.357	0.096	1	Proliferating	Vars
0.00106361	1.55849	0.286	0.06	1	Proliferating	Rhot2
0.0010974	1.74861	0.357	0.092	1	Proliferating	Fam122a
0.00125497	1.81105	0.429	0.134	1	Proliferating	Lfng
0.00126184	1.66716	0.286	0.062	1	Proliferating	Snhg5
0.00127688	2.16792	0.357	0.104	1	Proliferating	Ipo5
0.0013409	1.53347	0.357	0.092	1	Proliferating	Psmg2
0.00136837	1.65195	0.357	0.092	1	Proliferating	Taok2
0.00138086	1.63345	0.286	0.064	1	Proliferating	Rap1gap2
0.00149596	1.76067	0.429	0.134	1	Proliferating	Mast2
0.00153272	1.59552	0.286	0.064	1	Proliferating	Tsfm
0.0015493	1.92314	0.643	0.241	1	Proliferating	Cnn2
0.00158888	1.63063	0.357	0.094	1	Proliferating	Man2c1
0.00165268	1.65814	0.286	0.064	1	Proliferating	Tdp2
0.00169588	2.07225	0.286	0.067	1	Proliferating	Zfyve26
0.0017089	1.59495	0.5	0.179	1	Proliferating	Ola1
0.00171616	1.78765	0.357	0.097	1	Proliferating	Cd2bp2
0.0017401	1.5156	0.286	0.064	1	Proliferating	Nudt2
0.00176754	1.65524	0.357	0.096	1	Proliferating	Slc4a2
0.00178581	1.83599	0.357	0.1	1	Proliferating	Lmf2
0.00181419	1.6561	0.429	0.13	1	Proliferating	Dap3
0.00195357	1.57465	0.786	0.524	1	Proliferating	Lmna
0.00201604	1.62942	0.5	0.171	1	Proliferating	Tcerg1
0.00201778	1.7114	0.286	0.067	1	Proliferating	Fam241a
0.00206624	1.55628	0.286	0.066	1	Proliferating	Med24
0.00214752	1.6502	0.286	0.067	1	Proliferating	Mrpl37
0.00221992	1.58627	0.429	0.129	1	Proliferating	H1f0
0.00228337	1.58169	0.5	0.172	1	Proliferating	Ccng1
0.00229301	1.83382	0.357	0.103	1	Proliferating	Slc25a24
0.00240799	1.95884	0.286	0.07	1	Proliferating	Polr1c
0.00241133	1.50343	0.429	0.136	1	Proliferating	Htatsf1
0.00249474	1.83834	0.286	0.069	1	Proliferating	Tubgcp2
0.00253885	1.74775	0.286	0.069	1	Proliferating	Trmt2a
0.00254258	1.82638	0.5	0.179	1	Proliferating	Rbck1
0.00257199	1.73826	0.357	0.102	1	Proliferating	Cep112
0.00266477	1.96664	0.286	0.072	1	Proliferating	Dynlt1f
0.00269715	1.8425	0.286	0.071	1	Proliferating	Rnf168
0.0027516	1.53329	0.429	0.143	1	Proliferating	Rnd3
0.00278997	2.28993	0.286	0.076	1	Proliferating	Arhgap24
0.00287645	1.84929	0.286	0.071	1	Proliferating	Ksr1
0.00291696	1.61625	0.357	0.105	1	Proliferating	Casp8ap2
0.00293089	1.64561	0.286	0.069	1	Proliferating	Orc3
0.00299791	1.58776	0.286	0.07	1	Proliferating	Ppwd1
0.00303397	1.54533	0.357	0.101	1	Proliferating	Pign
0.00314275	1.57038	0.286	0.07	1	Proliferating	Chchd6
0.00314616	1.82928	0.286	0.073	1	Proliferating	Osbpl3
0.00316051	1.52439	0.286	0.069	1	Proliferating	Ppm1d
0.00336583	1.77427	0.286	0.072	1	Proliferating	Mrpl44
0.00354347	1.59785	0.429	0.148	1	Proliferating	Smarcb1
0.00366248	1.54703	0.286	0.07	1	Proliferating	Atad3a
0.00367514	1.64438	0.286	0.072	1	Proliferating	Ptrh2
0.00373351	2.29157	0.429	0.152	1	Proliferating	AU020206
0.00395686	1.62628	0.286	0.073	1	Proliferating	Cby1
0.00405408	1.6867	0.429	0.145	1	Proliferating	Mrpl55
0.00419819	1.57968	0.5	0.182	1	Proliferating	Cnot1
0.00420528	1.65336	0.357	0.107	1	Proliferating	Zdhhc5
0.00443172	1.54099	0.286	0.073	1	Proliferating	Gm20492
0.00451895	1.65852	0.357	0.11	1	Proliferating	Thap2
0.00453555	1.59538	0.357	0.112	1	Proliferating	Acvr2a
0.00483162	1.65429	0.286	0.075	1	Proliferating	Zdhhc6
0.00485091	1.73113	0.286	0.075	1	Proliferating	Ncbp1
0.00490723	1.94356	0.286	0.077	1	Proliferating	Tmco3
0.00502335	1.52922	0.286	0.073	1	Proliferating	Kat2a
0.00506478	1.54929	0.429	0.146	1	Proliferating	Scimp
0.00534006	1.50243	0.643	0.34	1	Proliferating	Tuba1c
0.00543562	1.63675	0.286	0.075	1	Proliferating	Mrpl39
0.00545855	1.74289	0.286	0.078	1	Proliferating	Rpa1
0.0058667	1.59599	0.357	0.116	1	Proliferating	Nudcd2
0.00637752	1.74809	0.286	0.08	1	Proliferating	Fdps
0.00640674	1.69383	0.429	0.148	1	Proliferating	Taf1
0.00645993	1.99463	0.286	0.083	1	Proliferating	Cdadc1
0.0067159	2.06594	0.357	0.117	1	Proliferating	Palld
0.00674872	1.5961	0.429	0.16	1	Proliferating	Igsf8
0.00683852	1.97711	0.286	0.083	1	Proliferating	Nkapd1
0.00773289	1.69461	0.286	0.082	1	Proliferating	Dvl1
0.00776121	1.60273	0.286	0.082	1	Proliferating	Gdpd3
0.00804996	1.6222	0.286	0.081	1	Proliferating	Atg16l2
0.00922087	1.71462	0.357	0.118	1	Proliferating	Slc25a17
0.00934432	1.57708	0.286	0.083	1	Proliferating	Gmeb1
0.00940878	1.73084	0.286	0.086	1	Proliferating	Cdc16
0.00979962	1.83343	0.357	0.123	1	Proliferating	Tap1
8.84627e-88	4.08838	0.812	0.051	1.84745e-83	MonoMacDC-CD209	Napsa
2.76333e-81	7.02681	0.292	0.002	5.77093e-77	MonoMacDC-CD209	Upb1
1.16542e-77	3.92932	0.812	0.06	2.43386e-73	MonoMacDC-CD209	Ccr2
6.61121e-73	4.35398	0.688	0.044	1.38069e-68	MonoMacDC-CD209	Tnip3
1.07582e-71	6.35852	0.333	0.006	2.24675e-67	MonoMacDC-CD209	Klrd1
1.82409e-69	4.30489	0.438	0.014	3.80943e-65	MonoMacDC-CD209	Mcemp1
8.18137e-63	4.60704	0.417	0.015	1.7086e-58	MonoMacDC-CD209	Gm15987
4.37158e-50	5.17064	0.25	0.005	9.1296e-46	MonoMacDC-CD209	Pkp3
1.00325e-49	4.04307	0.396	0.019	2.09519e-45	MonoMacDC-CD209	Kcnn4
1.7433e-49	4.9718	0.312	0.011	3.6407e-45	MonoMacDC-CD209	Skint3
2.37722e-48	4.19838	0.375	0.018	4.96459e-44	MonoMacDC-CD209	Ltb4r1
1.62389e-46	2.98112	0.812	0.11	3.39133e-42	MonoMacDC-CD209	Plbd1
2.45362e-44	4.48021	0.375	0.02	5.12414e-40	MonoMacDC-CD209	Ear2
4.08326e-44	4.75864	0.521	0.047	8.52748e-40	MonoMacDC-CD209	Cd209a
6.08608e-44	2.99166	0.812	0.114	1.27102e-39	MonoMacDC-CD209	Gpr132
6.314e-43	2.92382	0.792	0.112	1.31862e-38	MonoMacDC-CD209	Cytip
1.39536e-42	3.60065	0.688	0.087	2.91406e-38	MonoMacDC-CD209	Clec4b1
5.47905e-41	3.9795	0.396	0.025	1.14424e-36	MonoMacDC-CD209	Dna2
6.6088e-40	4.19914	0.375	0.024	1.38018e-35	MonoMacDC-CD209	Bhlhe40
1.64688e-39	4.05905	0.25	0.009	3.43935e-35	MonoMacDC-CD209	Tmem154
1.65689e-38	3.6392	0.458	0.039	3.46024e-34	MonoMacDC-CD209	Rab11fip1
8.11637e-38	4.10593	0.333	0.019	1.69502e-33	MonoMacDC-CD209	Cd2
1.5631e-37	4.49433	0.354	0.022	3.26438e-33	MonoMacDC-CD209	H2-Oa
6.83536e-37	4.34087	0.375	0.026	1.4275e-32	MonoMacDC-CD209	H2-DMb2
7.26084e-35	3.04289	0.604	0.079	1.51635e-30	MonoMacDC-CD209	Bcl2a1d
1.23559e-34	4.12025	0.25	0.011	2.58042e-30	MonoMacDC-CD209	Kynu
2.54786e-33	4.33399	0.312	0.02	5.32096e-29	MonoMacDC-CD209	Klrb1b
3.17027e-33	2.73102	0.646	0.094	6.62079e-29	MonoMacDC-CD209	Plaur
6.33514e-33	3.04602	0.688	0.113	1.32303e-28	MonoMacDC-CD209	Traf1
2.79114e-32	2.49349	0.917	0.228	5.82902e-28	MonoMacDC-CD209	Alcam
5.51034e-31	3.43028	0.25	0.012	1.15078e-26	MonoMacDC-CD209	Pla1a
1.06024e-30	3.60372	0.292	0.018	2.21421e-26	MonoMacDC-CD209	Map4k1
2.03437e-30	2.35069	0.375	0.032	4.24858e-26	MonoMacDC-CD209	Il7r
2.53597e-30	3.37446	0.375	0.033	5.29612e-26	MonoMacDC-CD209	Itgb7
9.34551e-30	2.45736	0.958	0.337	1.95172e-25	MonoMacDC-CD209	Lsp1
1.25657e-29	3.60377	0.312	0.022	2.62422e-25	MonoMacDC-CD209	Slc2a6
1.76013e-29	2.66233	0.708	0.13	3.67585e-25	MonoMacDC-CD209	Emb
4.23467e-29	2.83254	0.458	0.052	8.84368e-25	MonoMacDC-CD209	Nr4a3
1.96418e-28	2.55915	0.938	0.343	4.10199e-24	MonoMacDC-CD209	Tmsb10
2.59888e-28	2.53095	0.417	0.043	5.42749e-24	MonoMacDC-CD209	Tiam1
3.21572e-28	2.69103	0.479	0.058	6.71572e-24	MonoMacDC-CD209	Itgax
4.59096e-28	2.04048	0.438	0.047	9.58776e-24	MonoMacDC-CD209	Fgr
7.23965e-28	3.848	0.292	0.021	1.51193e-23	MonoMacDC-CD209	Hopx
3.56618e-26	2.61573	0.417	0.047	7.44762e-22	MonoMacDC-CD209	Grk3
5.11868e-25	3.11381	0.479	0.07	1.06898e-20	MonoMacDC-CD209	Olfm1
1.26639e-24	3.05804	0.396	0.045	2.64474e-20	MonoMacDC-CD209	Gm10634
1.69028e-24	2.83392	0.354	0.036	3.52999e-20	MonoMacDC-CD209	Hepacam2
2.22328e-24	1.98906	0.958	0.387	4.64309e-20	MonoMacDC-CD209	Lgals3
2.82684e-24	3.22214	0.271	0.021	5.90357e-20	MonoMacDC-CD209	Pkd1l2
3.57116e-24	2.35203	0.958	0.485	7.45802e-20	MonoMacDC-CD209	S100a4
3.93039e-24	2.18219	1	0.536	8.20822e-20	MonoMacDC-CD209	H2-Ab1
4.65007e-24	2.29118	0.979	0.557	9.71121e-20	MonoMacDC-CD209	Cd52
7.1313e-24	2.35628	0.458	0.06	1.4893e-19	MonoMacDC-CD209	Rnase6
8.92413e-24	2.1571	1	0.508	1.86372e-19	MonoMacDC-CD209	H2-Eb1
1.03875e-23	2.04208	1	0.497	2.16933e-19	MonoMacDC-CD209	H2-Aa
3.05605e-23	1.85377	0.979	0.502	6.38225e-19	MonoMacDC-CD209	S100a11
6.27454e-23	3.22845	0.521	0.093	1.31038e-18	MonoMacDC-CD209	Avpi1
1.51423e-22	2.54644	0.646	0.135	3.16232e-18	MonoMacDC-CD209	Slamf7
1.13995e-21	1.91493	1	0.699	2.38067e-17	MonoMacDC-CD209	Cd74
5.12144e-21	2.86003	0.417	0.06	1.06956e-16	MonoMacDC-CD209	Sowahc
5.19513e-21	2.55281	0.375	0.049	1.08495e-16	MonoMacDC-CD209	Dusp5
5.43471e-21	3.34364	0.333	0.039	1.13498e-16	MonoMacDC-CD209	Gm36486
8.26737e-21	2.04772	0.625	0.137	1.72656e-16	MonoMacDC-CD209	Rgs1
1.2124e-20	2.33365	0.938	0.441	2.53198e-16	MonoMacDC-CD209	Gm2a
5.04638e-20	2.32379	0.938	0.385	1.05389e-15	MonoMacDC-CD209	Anxa2
1.67307e-19	2.4728	0.583	0.135	3.49403e-15	MonoMacDC-CD209	Il1b
2.75358e-19	2.08781	0.896	0.373	5.75058e-15	MonoMacDC-CD209	Syngr2
3.60885e-19	1.88297	0.792	0.235	7.53673e-15	MonoMacDC-CD209	Pim1
7.7285e-19	2.71453	0.333	0.042	1.61402e-14	MonoMacDC-CD209	Arl5c
7.7753e-19	2.96813	0.354	0.049	1.62379e-14	MonoMacDC-CD209	Bri3bp
8.74307e-19	2.25253	0.417	0.065	1.8259e-14	MonoMacDC-CD209	Il2rg
9.65017e-19	2.96472	0.292	0.033	2.01534e-14	MonoMacDC-CD209	Ryr1
2.03304e-18	2.22934	0.521	0.105	4.2458e-14	MonoMacDC-CD209	Nr4a2
2.91579e-18	3.1794	0.292	0.035	6.08933e-14	MonoMacDC-CD209	Lmo1
3.61697e-18	1.73466	0.917	0.379	7.55367e-14	MonoMacDC-CD209	H2-DMb1
3.85785e-18	2.28816	0.583	0.129	8.05672e-14	MonoMacDC-CD209	Slc38a1
7.28079e-18	1.73428	0.938	0.486	1.52052e-13	MonoMacDC-CD209	H2-DMa
2.3663e-17	1.93621	0.292	0.035	4.94179e-13	MonoMacDC-CD209	Cd24a
2.51151e-17	1.73251	0.562	0.116	5.24503e-13	MonoMacDC-CD209	Myo1g
2.76445e-17	2.56167	0.292	0.035	5.77328e-13	MonoMacDC-CD209	Ms4a4c
7.78661e-17	1.71252	0.833	0.303	1.62616e-12	MonoMacDC-CD209	Cd44
9.78781e-17	2.12368	0.396	0.066	2.04409e-12	MonoMacDC-CD209	Bcl2a1a
2.01589e-16	1.68872	0.938	0.669	4.20998e-12	MonoMacDC-CD209	S100a6
2.81722e-16	2.41389	0.5	0.11	5.88348e-12	MonoMacDC-CD209	Chn2
8.30287e-16	1.89056	0.458	0.093	1.73397e-11	MonoMacDC-CD209	Xylt1
8.8048e-16	2.46604	0.375	0.064	1.8388e-11	MonoMacDC-CD209	Aff3
2.02321e-15	1.98434	0.708	0.22	4.22527e-11	MonoMacDC-CD209	Gm20513
3.17704e-15	1.8127	0.979	0.932	6.63494e-11	MonoMacDC-CD209	Crip1
4.93915e-15	1.57956	0.75	0.23	1.03149e-10	MonoMacDC-CD209	Ramp1
5.14276e-15	1.5521	0.646	0.171	1.07401e-10	MonoMacDC-CD209	Lat2
6.44175e-15	1.74269	0.542	0.129	1.34529e-10	MonoMacDC-CD209	Etv3
7.89838e-15	1.80372	0.479	0.103	1.6495e-10	MonoMacDC-CD209	Jak2
8.59957e-15	2.04419	0.396	0.074	1.79594e-10	MonoMacDC-CD209	Malt1
2.52935e-14	1.79758	0.333	0.056	5.2823e-10	MonoMacDC-CD209	Hilpda
3.45741e-14	2.87994	0.25	0.033	7.22046e-10	MonoMacDC-CD209	Amz1
6.04168e-14	3.89317	0.479	0.13	1.26174e-09	MonoMacDC-CD209	Fn1
8.57174e-14	2.90128	0.292	0.046	1.79012e-09	MonoMacDC-CD209	Srgap3
1.97648e-13	3.01285	0.292	0.047	4.12768e-09	MonoMacDC-CD209	Nfil3
2.29285e-13	2.57669	0.25	0.035	4.78838e-09	MonoMacDC-CD209	Adam8
3.87169e-13	2.24915	0.542	0.151	8.08563e-09	MonoMacDC-CD209	Tnfaip3
4.20377e-13	1.68299	0.521	0.128	8.77915e-09	MonoMacDC-CD209	Gsto1
5.2942e-13	1.86251	0.521	0.137	1.10564e-08	MonoMacDC-CD209	Csf2rb
6.22999e-13	1.92365	0.354	0.068	1.30107e-08	MonoMacDC-CD209	St3gal5
1.09829e-12	2.13605	0.271	0.042	2.29367e-08	MonoMacDC-CD209	Glipr2
1.46491e-12	2.24398	0.292	0.049	3.05932e-08	MonoMacDC-CD209	H2-Ob
1.71342e-12	4.14615	0.333	0.067	3.57831e-08	MonoMacDC-CD209	Lyz1
1.90787e-12	1.80765	0.479	0.119	3.9844e-08	MonoMacDC-CD209	1700025G04Rik
2.12701e-12	1.81269	0.542	0.149	4.44204e-08	MonoMacDC-CD209	Pmaip1
4.262e-12	1.52925	0.333	0.062	8.90076e-08	MonoMacDC-CD209	Bzw2
6.8121e-12	2.09906	0.292	0.051	1.42264e-07	MonoMacDC-CD209	Krt80
6.98254e-12	1.6863	0.5	0.135	1.45823e-07	MonoMacDC-CD209	Fyn
8.29042e-12	2.08691	0.396	0.092	1.73137e-07	MonoMacDC-CD209	Rin3
1.05008e-11	1.76581	0.792	0.336	2.19298e-07	MonoMacDC-CD209	Gadd45b
1.11191e-11	1.64999	0.333	0.066	2.32211e-07	MonoMacDC-CD209	Lmnb1
1.6444e-11	2.07567	0.438	0.114	3.43418e-07	MonoMacDC-CD209	Agpat4
1.97706e-11	1.68097	0.542	0.167	4.1289e-07	MonoMacDC-CD209	Samsn1
3.77074e-11	1.96137	0.333	0.068	7.87482e-07	MonoMacDC-CD209	Csrnp1
3.90805e-11	1.65937	0.75	0.327	8.16158e-07	MonoMacDC-CD209	Pde4b
5.89345e-11	1.52413	0.458	0.122	1.23079e-06	MonoMacDC-CD209	Vps37b
6.32785e-11	2.08612	0.542	0.175	1.32151e-06	MonoMacDC-CD209	Fem1c
8.1964e-11	2.56661	0.271	0.05	1.71174e-06	MonoMacDC-CD209	Grasp
8.23452e-11	1.74826	0.542	0.162	1.7197e-06	MonoMacDC-CD209	Cers6
8.46437e-11	1.63724	0.521	0.15	1.7677e-06	MonoMacDC-CD209	Plxnd1
9.93605e-11	2.24451	0.458	0.133	2.07505e-06	MonoMacDC-CD209	Ezr
1.51325e-10	1.55746	0.812	0.445	3.16027e-06	MonoMacDC-CD209	H2afy
1.9529e-10	2.8953	0.271	0.052	4.07844e-06	MonoMacDC-CD209	Snhg15
2.04089e-10	2.38747	0.292	0.057	4.26219e-06	MonoMacDC-CD209	Ece1
2.25554e-10	2.17393	0.292	0.058	4.71048e-06	MonoMacDC-CD209	Me2
2.27592e-10	1.62491	0.521	0.156	4.75302e-06	MonoMacDC-CD209	Cbfa2t3
2.3322e-10	1.74962	0.354	0.08	4.87056e-06	MonoMacDC-CD209	Mthfd2
3.95898e-10	1.50514	0.479	0.137	8.26794e-06	MonoMacDC-CD209	Rilpl2
4.47105e-10	1.56029	0.375	0.089	9.33733e-06	MonoMacDC-CD209	Sipa1l3
5.55932e-10	1.67084	0.458	0.133	1.16101e-05	MonoMacDC-CD209	Phlpp1
9.56062e-10	1.84546	0.292	0.061	1.99664e-05	MonoMacDC-CD209	Dot1l
1.57886e-09	1.95714	0.479	0.152	3.29728e-05	MonoMacDC-CD209	Sept9
2.18991e-09	1.87981	0.333	0.08	4.57341e-05	MonoMacDC-CD209	Alkbh1
2.2509e-09	3.84978	0.333	0.089	4.70079e-05	MonoMacDC-CD209	Retnla
3.16027e-09	1.77579	0.521	0.171	6.59991e-05	MonoMacDC-CD209	Zc3h12a
4.52209e-09	1.55017	0.542	0.187	9.44394e-05	MonoMacDC-CD209	Ccrl2
5.74593e-09	1.51365	0.562	0.2	0.000119998	MonoMacDC-CD209	Sept11
5.79084e-09	1.61211	0.542	0.195	0.000120936	MonoMacDC-CD209	Ybx3
[truncated: 2,038 more rows]
