# Supplementary material for: Elevated apolipoprotein C3 heightens atherosclerosis risk by mediating arterial accumulation of free cholesterol and local inflammation in diabetes
Source: Research Square preprint supplement (doi:10.21203/rs.3.rs-6979508/v1), 2025-07-16
Supplement: Supplementary file 4 [file b7f3ef0383c30634c2975475.xlsx]

## Sheet: read me
sample name	Study Group
lib104962_2225GLLNX	control
lib104963_2225GLLNX	control
lib104964_2225GLLNX	control
lib104965_2225GLLNX	control
lib104966_2225GLLNX	APOC3
lib104967_2225GLLNX	APOC3
lib104968_2225GLLNX	APOC3
lib104969_2225GLLNX	APOC3
Positive logfold =increased in APOC3 treatment
Pre-filter set to > 0) >= 4
Filtered out 5122 genes (with more than 4 zeros)

## Sheet: DEseq
								control	control	control	control	APOC3	APOC3	APOC3	APOC3
gene_id	genes	baseMean	log2FoldChange	lfcSE	stat	pvalue	padj	lib104962_2225GLLNX	lib104963_2225GLLNX	lib104964_2225GLLNX	lib104965_2225GLLNX	lib104966_2225GLLNX	lib104967_2225GLLNX	lib104968_2225GLLNX	lib104969_2225GLLNX
ENSG00000109084	TMEM97	155.997	0.749881	0.214896	3.48951	0.000483915	0.983723	114.701	115.544	138.624	96.069	162.83	203.212	240.422	176.572
ENSG00000257151	PWAR6	2.79549	-4.24337	1.28133	-3.31169	0.000927337	0.983723	4.77919	4.99651	2.34955	9.51178	0.726918	0	0	0
ENSG00000277232	GTSE1-AS1	2.55915	-4.13567	1.28712	-3.21311	0.00131304	0.983723	1.59306	5.62107	5.87388	6.65825	0.726918	0	0	0
ENSG00000197077	KIAA1671	25.2721	-0.998312	0.31579	-3.16132	0.00157056	0.983723	36.6405	33.1019	35.2433	30.4377	18.173	12.921	17.4219	18.2374
ENSG00000121769	FABP3	220.694	0.809077	0.266836	3.03211	0.00242851	0.983723	140.19	189.867	163.294	146.481	242.791	199.688	426.256	256.982
ENSG00000242732	RTL5	11.8178	-1.5026	0.50591	-2.9701	0.002977	0.983723	14.3376	15.6141	15.2721	24.7306	8.72302	9.39707	2.32292	4.14487
ENSG00000170989	S1PR1	6.12564	-2.18172	0.737248	-2.95927	0.00308368	0.983723	1.59306	12.4913	11.7478	14.2677	2.90767	2.34927	1.16146	2.48692
ENSG00000100078	PLA2G3	8.82269	1.822	0.6163	2.95636	0.00311297	0.983723	1.59306	6.8702	0	5.70707	13.0845	17.6195	11.6146	14.0926
ENSG00000196460	RFX8	6.41689	2.42849	0.8225	2.95258	0.00315132	0.983723	3.18613	1.87369	1.17478	1.90236	7.26918	8.22243	24.3907	3.3159
ENSG00000196208	GREB1	10.9243	-1.44001	0.489574	-2.94135	0.00326783	0.983723	12.7445	19.986	18.7964	12.3653	7.9961	7.0478	3.48438	4.97385
ENSG00000162777	DENND2D	2.30478	-3.89012	1.3383	-2.90676	0.00365188	0.983723	4.77919	1.24913	5.87388	5.70707	0	0	0	0.828975
ENSG00000280515	SALRNA2	1.73845	-4.25744	1.46973	-2.89676	0.00377043	0.983723	4.77919	0.624564	4.6991	3.80471	0	0	0	0
ENSG00000270696	AC005034.3	9.98841	-1.48067	0.512446	-2.88942	0.00385954	0.983723	17.5237	10.6176	15.2721	16.17	7.9961	4.69853	3.48438	4.14487
ENSG00000181619	GPR135	6.15699	-2.15453	0.746479	-2.88626	0.00389855	0.983723	4.77919	7.49476	7.04866	20.9259	2.18075	2.34927	1.16146	3.3159
ENSG00000120437	ACAT2	665.532	0.700044	0.242643	2.88507	0.00391322	0.983723	477.919	560.234	487.532	501.271	697.841	663.668	1248.57	687.22
ENSG00000165392	WRN	57.7937	-0.834943	0.290611	-2.87306	0.00406514	0.983723	89.2116	58.0844	77.5352	72.2896	47.9766	56.3824	30.198	30.6721
ENSG00000168939	SPRY3	7.9848	1.9937	0.696018	2.86444	0.00417745	0.983723	3.18613	7.49476	1.17478	0	12.3576	16.4449	11.6146	11.6056
ENSG00000174529	TMEM81	1.75277	-4.30733	1.52113	-2.83167	0.00463063	0.983723	1.59306	0.624564	7.04866	4.75589	0	0	0	0
ENSG00000090565	RAB11FIP3	63.0055	-0.842484	0.29897	-2.81796	0.00483302	0.983723	78.0601	66.2038	84.5839	96.069	50.8843	46.9853	23.2292	58.0282
ENSG00000105792	CFAP69	8.98928	1.57879	0.565396	2.79235	0.00523265	0.983723	3.18613	3.74738	2.34955	8.56061	15.2653	14.0956	8.13022	16.5795
ENSG00000100024	UPB1	2.14724	-3.79035	1.38828	-2.73024	0.00632882	0.983723	1.59306	3.12282	9.39821	1.90236	0	0	1.16146	0
ENSG00000171316	CHD7	9.84229	1.47905	0.542151	2.72812	0.00636971	0.983723	1.59306	9.36846	3.52433	4.75589	16.7191	12.921	17.4219	12.4346
ENSG00000002587	HS3ST1	3.70714	3.08603	1.14062	2.70557	0.00681863	0.983723	1.59306	0.624564	1.17478	0	3.63459	5.87317	15.099	1.65795
ENSG00000054690	PLEKHH1	1.94469	-3.6111	1.33633	-2.70225	0.00688715	0.983723	4.77919	2.49825	2.34955	4.75589	0	1.17463	0	0
ENSG00000167508	MVD	1322.53	0.476917	0.176785	2.69772	0.00698161	0.983723	960.617	1204.16	1134.83	1121.44	1555.6	1353.18	1902.47	1347.91
ENSG00000198924	DCLRE1A	30.9832	-0.837642	0.311428	-2.68968	0.00715212	0.983723	47.7919	33.7264	34.0685	44.7054	23.9883	19.9688	16.2604	27.3562
ENSG00000109511	ANXA10	32.5255	0.972645	0.362986	2.67957	0.00737173	0.983723	30.2682	21.8597	19.9712	16.17	39.2536	41.1122	65.0418	26.5272
ENSG00000164758	MED30	17.4441	1.32488	0.494765	2.67781	0.0074106	0.983723	3.18613	11.2421	11.7478	12.3653	20.3537	17.6195	46.4584	16.5795
ENSG00000172346	CSDC2	22.7689	-0.946966	0.354997	-2.66753	0.00764109	0.983723	28.6751	26.8562	34.0685	31.3889	20.3537	15.2702	8.13022	17.4085
ENSG00000112742	TTK	3.60903	-2.791	1.05084	-2.65598	0.00790793	0.983723	3.18613	8.11933	2.34955	11.4141	1.45384	2.34927	0	0
ENSG00000260844	AC055876.4	2.08142	3.56372	1.34812	2.64347	0.008206	0.983723	1.59306	0	0	0	2.90767	3.5239	6.96876	1.65795
ENSG00000107758	PPP3CB	88.8693	-0.599275	0.22695	-2.64056	0.00827694	0.983723	135.41	87.4389	110.429	97.0202	69.7841	77.5258	60.3959	72.9498
ENSG00000196437	ZNF569	41.7089	-0.788198	0.299608	-2.63076	0.00851943	0.983723	50.978	47.4668	37.5928	75.1431	32.7113	32.8897	27.875	29.0141
ENSG00000047621	C12orf4	134.772	-0.533039	0.203462	-2.61984	0.00879708	0.983723	165.679	123.039	171.517	178.822	107.584	113.939	99.8856	117.714
ENSG00000150995	ITPR1	25.085	-1.28602	0.492505	-2.61118	0.00902295	0.983723	38.2335	9.36846	39.9424	55.1684	15.9922	15.2702	15.099	11.6056
ENSG00000185379	RAD51D	33.1915	-0.923967	0.354109	-2.60927	0.00907346	0.983723	43.0127	38.0984	54.0397	39.9495	31.2575	25.8419	9.29168	24.0403
ENSG00000073536	NLE1	40.6413	-0.684774	0.262674	-2.60694	0.00913565	0.983723	52.5711	49.3405	41.1172	57.0707	29.8036	30.5405	34.8438	29.8431
ENSG00000197608	ZNF841	29.6006	-0.910368	0.349336	-2.606	0.00916067	0.983723	50.978	39.9721	30.5442	33.2912	14.5384	27.0166	13.9375	26.5272
ENSG00000163637	PRICKLE2	29.4073	-0.948977	0.364929	-2.60044	0.00931037	0.983723	50.978	36.2247	36.4181	32.3401	19.6268	25.8419	8.13022	25.6982
ENSG00000081181	ARG2	12.259	1.22534	0.472508	2.59326	0.00950707	0.983723	11.1514	6.24564	7.04866	5.70707	18.173	12.921	24.3907	12.4346
ENSG00000198719	DLL1	1.9723	3.57264	1.38013	2.58863	0.00963587	0.983723	0	0	0	0.951178	5.81535	4.69853	3.48438	0.828975
ENSG00000135517	MIP	2.00496	3.49355	1.35879	2.57108	0.0101381	0.983723	1.59306	0	0	0	1.45384	4.69853	5.8073	2.48692
ENSG00000108091	CCDC6	92.1521	-0.792549	0.308556	-2.56857	0.0102118	0.983723	148.155	94.9337	117.478	108.434	67.6034	81.0497	32.5209	87.0423
ENSG00000197506	SLC28A3	10.824	-1.38944	0.543067	-2.5585	0.0105125	0.983723	25.489	16.8632	7.04866	13.3165	4.36151	9.39707	3.48438	6.6318
ENSG00000198901	PRC1	13.8003	-1.51706	0.593143	-2.55767	0.0105376	0.983723	25.489	9.36846	28.1946	19.9747	14.5384	5.87317	1.16146	5.80282
ENSG00000003989	SLC7A2	46.716	-0.944934	0.369933	-2.55434	0.010639	0.983723	55.7572	44.344	48.1658	97.9714	31.9844	41.1122	16.2604	38.1328
ENSG00000183579	ZNRF3	14.3267	1.08927	0.433292	2.51394	0.0119389	0.983723	11.1514	10.6176	8.22343	6.65825	17.446	27.0166	12.7761	20.7244
ENSG00000154889	MPPE1	63.1382	0.57495	0.229073	2.50989	0.0120767	0.983723	54.1642	54.9616	42.2919	51.3636	78.5072	63.4302	82.4637	77.9236
ENSG00000169093	ASMTL	172.769	0.487541	0.195188	2.49781	0.0124964	0.983723	111.514	174.253	138.624	147.433	199.176	196.164	221.839	193.151
ENSG00000174485	DENND4A	34.0808	-0.891337	0.357477	-2.49341	0.0126522	0.983723	58.9434	40.5966	52.8649	25.6818	21.0806	29.3658	15.099	29.0141
ENSG00000167548	KMT2D	15.3775	-1.08977	0.438487	-2.48531	0.012944	0.983723	14.3376	19.986	27.0198	22.8283	12.3576	10.5717	3.48438	12.4346
ENSG00000116539	ASH1L	66.5117	-0.599328	0.242144	-2.47509	0.0133204	0.983723	98.7699	79.9442	72.8361	70.3872	58.8804	58.7317	39.4896	53.0544
ENSG00000175106	TVP23C	17.4396	-1.03037	0.416391	-2.47452	0.0133414	0.983723	28.6751	16.8632	28.1946	19.9747	6.54226	10.5717	16.2604	12.4346
ENSG00000242779	ZNF702P	45.4105	-0.68776	0.278191	-2.47226	0.0134262	0.983723	60.5364	58.709	66.9622	38.0471	35.619	35.239	38.3282	29.8431
ENSG00000141577	CEP131	21.4674	-0.889727	0.360956	-2.46492	0.0137043	0.983723	25.489	30.6036	23.4955	32.3401	18.173	15.2702	8.13022	18.2374
ENSG00000135045	C9orf40	29.1198	0.822758	0.333868	2.46432	0.0137274	0.983723	12.7445	26.8562	23.4955	19.0236	33.4382	39.9375	47.6199	29.8431
ENSG00000225138	SLC9A3-AS1	4.29097	-2.02857	0.823244	-2.46412	0.013735	0.983723	9.55838	5.62107	4.6991	7.60943	2.18075	1.17463	3.48438	0
ENSG00000244625	MIATNB	12.8944	1.21616	0.494214	2.46081	0.0138626	0.983723	9.55838	8.11933	3.52433	9.51178	14.5384	15.2702	30.198	12.4346
ENSG00000237984	PTENP1	4.37965	1.86496	0.758353	2.45922	0.0139239	0.983723	1.59306	2.49825	1.17478	1.90236	6.54226	8.22243	8.13022	4.97385
ENSG00000138347	MYPN	2.55164	-2.78796	1.13796	-2.44997	0.0142869	0.983723	4.77919	6.24564	2.34955	4.75589	1.45384	0	0	0.828975
ENSG00000221994	ZNF630	4.47446	2.21744	0.906633	2.4458	0.0144531	0.983723	0	0	4.6991	1.90236	8.72302	5.87317	10.4531	4.14487
ENSG00000118997	DNAH7	1.69823	3.40921	1.39498	2.44391	0.0145293	0.983723	0	0.624564	0	0	5.81535	1.17463	3.48438	2.48692
ENSG00000103145	HCFC1R1	42.2279	0.709927	0.290666	2.44241	0.0145894	0.983723	30.2682	34.351	28.1946	34.2424	42.8882	44.6361	74.3334	48.9095
ENSG00000227036	LINC00511	9.29007	1.58624	0.64955	2.44206	0.0146037	0.983723	12.7445	3.74738	2.34955	0.951178	8.72302	16.4449	18.5834	10.7767
ENSG00000144559	TAMM41	63.9695	0.653556	0.267653	2.44181	0.0146139	0.983723	60.5364	49.9651	50.5154	38.9983	82.8687	55.2078	99.8856	73.7787
ENSG00000074582	BCS1L	146.869	0.453216	0.186217	2.4338	0.014941	0.983723	129.038	136.155	112.778	116.995	171.553	162.099	196.287	150.044
ENSG00000082701	GSK3B	115.393	-0.550546	0.227487	-2.42012	0.0155155	0.983723	176.83	130.534	112.778	130.311	90.1379	95.1453	75.4949	111.912
ENSG00000072657	TRHDE	7.73921	-1.73283	0.718534	-2.41162	0.0158817	0.983723	19.1168	11.2421	5.87388	12.3653	7.9961	1.17463	0	4.14487
ENSG00000206573	THUMPD3-AS1	32.456	0.754281	0.313029	2.40962	0.0159693	0.983723	25.489	26.2317	28.1946	17.1212	47.9766	30.5405	47.6199	36.4749
ENSG00000137504	CREBZF	104.866	-0.636672	0.265007	-2.40247	0.0162846	0.983723	167.272	119.916	97.5064	127.458	92.3186	95.1453	52.2657	87.0423
ENSG00000120899	PTK2B	18.2824	-1.03571	0.431772	-2.39875	0.0164513	0.983723	23.896	24.9825	25.8451	24.7306	18.173	9.39707	3.48438	15.7505
ENSG00000160588	MPZL3	9.80781	-1.87666	0.787137	-2.38416	0.0171182	0.983723	15.9306	11.8667	18.7964	15.2189	0	5.87317	0	10.7767
ENSG00000214212	C19orf38	4.52463	1.94243	0.815179	2.38282	0.0171805	0.983723	0	1.87369	3.52433	1.90236	13.0845	4.69853	6.96876	4.14487
ENSG00000183508	FAM46C	5.14159	-2.13284	0.896523	-2.37902	0.0173589	0.983723	1.59306	4.99651	8.22343	19.0236	3.63459	1.17463	0	2.48692
ENSG00000131061	ZNF341	14.0231	-0.986905	0.415386	-2.37587	0.0175075	0.983723	17.5237	17.4878	22.3207	17.1212	10.9038	10.5717	10.4531	5.80282
ENSG00000091129	NRCAM	8.05022	-1.26559	0.532718	-2.37572	0.0175149	0.983723	12.7445	9.36846	14.0973	9.51178	4.36151	4.69853	4.64584	4.97385
ENSG00000189046	ALKBH2	41.9369	0.904937	0.380977	2.3753	0.0175345	0.983723	28.6751	35.6001	21.146	30.4377	59.6073	38.7629	90.5939	30.6721
ENSG00000267421	AC005498.2	2.75172	2.73435	1.15179	2.374	0.0175963	0.983723	0	0.624564	0	1.90236	2.18075	4.69853	9.29168	3.3159
ENSG00000173542	MOB1B	65.6564	-0.771165	0.325325	-2.37044	0.0177669	0.983723	79.6532	68.0774	102.205	81.8014	56.6996	70.478	23.2292	43.1067
ENSG00000138386	NAB1	21.5894	-0.845966	0.35716	-2.36859	0.017856	0.983723	31.8613	23.1089	25.8451	31.3889	21.0806	10.5717	13.9375	14.9215
ENSG00000163138	PACRGL	36.9634	0.801434	0.338435	2.36806	0.0178817	0.983723	28.6751	23.1089	31.7189	24.7306	36.3459	30.5405	70.8491	49.7385
ENSG00000197467	COL13A1	75.151	0.517114	0.218748	2.36397	0.0180803	0.983723	60.5364	57.4599	70.4866	58.9731	91.5917	93.9707	95.2397	72.9498
ENSG00000116830	TTF2	33.1658	-0.802248	0.339426	-2.36354	0.0181012	0.983723	35.0474	36.2247	51.6901	45.6566	29.8036	34.0644	16.2604	16.5795
ENSG00000131931	THAP1	74.3026	0.667727	0.282961	2.35978	0.0182857	0.983723	54.1642	61.8318	65.7874	46.6077	67.6034	102.193	126.599	69.6339
ENSG00000240356	RPL23AP7	46.6241	0.856237	0.364259	2.35063	0.0187417	0.983723	39.8266	39.9721	25.8451	26.633	50.1574	39.9375	103.37	47.2516
ENSG00000164283	ESM1	11.2735	1.2929	0.553514	2.3358	0.0195018	0.983723	7.96532	4.99651	4.6991	8.56061	9.44994	9.39707	30.198	14.9215
ENSG00000228696	ARL17B	3.58267	1.95052	0.840421	2.32089	0.020293	0.983723	1.59306	1.24913	2.34955	0.951178	6.54226	4.69853	4.64584	6.6318
ENSG00000145194	ECE2	60.1332	0.804755	0.347084	2.31862	0.0204156	0.983723	46.1988	46.8423	44.6415	37.096	66.8765	46.9853	133.568	58.8572
ENSG00000152484	USP12	139.119	-0.585696	0.252661	-2.31811	0.0204433	0.983723	195.947	119.916	184.44	169.31	103.949	133.908	77.8178	127.662
ENSG00000197061	HIST1H4C	61.0198	0.79923	0.345294	2.31463	0.020633	0.983723	41.4197	38.723	42.2919	55.1684	65.4226	54.0331	134.729	56.3703
ENSG00000262406	MMP12	30.9189	0.901464	0.390159	2.3105	0.0208604	0.983723	23.896	26.8562	24.6703	10.463	32.7113	31.7151	63.8803	33.159
ENSG00000159314	ARHGAP27	4.01126	2.19835	0.952463	2.30807	0.0209955	0.983723	3.18613	2.49825	0	0	4.36151	12.921	5.8073	3.3159
ENSG00000186153	WWOX	26.9612	0.728654	0.316446	2.30262	0.0213004	0.983723	20.7098	14.365	22.3207	24.7306	34.1652	32.8897	32.5209	33.988
ENSG00000205643	CDPF1	60.8149	0.535769	0.232943	2.3	0.0214481	0.983723	49.385	52.4634	52.8649	43.7542	71.238	59.9063	84.7866	72.1208
ENSG00000109756	RAPGEF2	20.1469	-1.3342	0.580532	-2.29824	0.0215482	0.983723	50.978	16.2387	17.6216	31.3889	9.44994	15.2702	1.16146	19.0664
ENSG00000232931	LINC00342	2.02103	-2.89411	1.26078	-2.2955	0.0217044	0.983723	4.77919	3.12282	3.52433	2.85354	0.726918	0	1.16146	0
ENSG00000283108	AC011451.3	1.64949	3.29098	1.43403	2.29492	0.021738	0.983723	0	0.624564	0	0	0.726918	5.87317	3.48438	2.48692
ENSG00000101152	DNAJC5	80.9161	-0.581001	0.253297	-2.29375	0.0218047	0.983723	113.108	69.3266	117.478	90.362	72.6918	65.7795	52.2657	66.318
ENSG00000102755	FLT1	12.5707	1.32693	0.579194	2.291	0.0219635	0.983723	15.9306	8.11933	3.52433	1.90236	9.44994	23.4927	17.4219	20.7244
ENSG00000087448	KLHL42	81.5278	-0.647096	0.282614	-2.28968	0.0220398	0.983723	101.956	72.4494	96.3316	127.458	55.9727	88.0975	45.2969	64.66
ENSG00000073605	GSDMB	3.70267	-2.10091	0.919953	-2.28372	0.0223881	0.983723	7.96532	4.99651	9.39821	1.90236	2.18075	2.34927	0	0.828975
ENSG00000151552	QDPR	349.864	0.513564	0.225063	2.28187	0.0224969	0.983723	277.193	342.885	286.645	244.453	375.09	351.215	569.115	352.314
ENSG00000183458	AC138932.1	3.70644	-1.9122	0.838378	-2.28083	0.0225585	0.983723	4.77919	4.37195	7.04866	7.60943	2.18075	1.17463	0	2.48692
ENSG00000188801	ZNF322P1	1.5787	-3.23192	1.42135	-2.27383	0.022976	0.983723	4.77919	1.24913	3.52433	1.90236	0	1.17463	0	0
ENSG00000153832	FBXO36	27.5643	-0.753646	0.331844	-2.27109	0.0231417	0.983723	36.6405	26.8562	35.2433	39.9495	19.6268	14.0956	29.0365	19.0664
ENSG00000096717	SIRT1	72.5413	-0.559789	0.246673	-2.26936	0.0232464	0.983723	82.8393	64.3301	96.3316	102.727	58.1535	69.3034	51.1042	55.5413
ENSG00000112308	C6orf62	254.247	-0.639094	0.281786	-2.26801	0.0233286	0.983723	493.85	293.545	212.634	239.697	171.553	204.386	227.646	190.664
ENSG00000144730	IL17RD	3.74504	-2.15058	0.948656	-2.26698	0.0233917	0.983723	6.37225	2.49825	8.22343	7.60943	2.90767	2.34927	0	0
ENSG00000183971	NPW	1.21735	3.63872	1.60785	2.26309	0.02363	0.983723	0	0	0	0	0.726918	4.69853	3.48438	0.828975
ENSG00000078124	ACER3	92.3973	-0.478523	0.211466	-2.26288	0.0236428	0.983723	87.6185	104.927	124.526	112.239	70.5111	88.0975	70.8491	80.4105
ENSG00000246090	AP002026.1	7.68456	-1.24132	0.548808	-2.26185	0.0237064	0.983723	9.55838	8.74389	12.9225	12.3653	5.08843	2.34927	4.64584	5.80282
ENSG00000185344	ATP6V0A2	120.887	-0.680281	0.300989	-2.26015	0.0238118	0.983723	122.666	141.776	163.294	168.359	119.942	111.59	44.1355	95.3321
ENSG00000233608	TWIST2	33.6865	0.73026	0.323316	2.25866	0.0239046	0.983723	28.6751	24.9825	21.146	26.633	47.2497	32.8897	58.073	29.8431
ENSG00000230257	NFE4	19.5539	0.983656	0.436187	2.25512	0.0241257	0.983723	12.7445	13.1158	14.0973	12.3653	29.0767	18.7941	42.974	13.2636
ENSG00000174109	C16orf91	64.1444	0.848337	0.376797	2.25144	0.0243577	0.983723	46.1988	58.0844	45.8163	32.3401	77.7802	54.0331	147.505	51.3964
ENSG00000204428	LY6G5C	8.23031	1.41047	0.62952	2.24056	0.0250548	0.983723	3.18613	9.36846	2.34955	1.90236	9.44994	9.39707	18.5834	11.6056
ENSG00000106268	NUDT1	42.3927	1.11291	0.497185	2.23843	0.025193	0.983723	14.3376	23.1089	28.1946	40.9007	62.515	18.7941	111.5	39.7908
ENSG00000114331	ACAP2	161.839	-0.464054	0.207339	-2.23814	0.0252117	0.983723	227.808	167.383	167.993	189.285	130.845	150.353	106.854	154.189
ENSG00000157680	DGKI	39.2156	-0.782046	0.349721	-2.2362	0.0253387	0.983723	68.5017	38.723	38.7676	53.266	25.4421	39.9375	15.099	33.988
ENSG00000090060	PAPOLA	215.285	-0.502706	0.224919	-2.23505	0.0254142	0.983723	294.717	224.843	218.508	272.988	172.28	209.085	124.276	205.586
ENSG00000231304	SGO1-AS1	1.21406	3.63779	1.62929	2.23275	0.0255655	0.983723	0	0	0	0	0.726918	2.34927	5.8073	0.828975
ENSG00000198934	MAGEE1	15.4065	-0.873558	0.391895	-2.22906	0.0258097	0.983723	25.489	18.1123	16.4469	19.9747	9.44994	9.39707	12.7761	11.6056
ENSG00000163605	PPP4R2	129.198	-0.386444	0.17365	-2.22542	0.0260529	0.983723	149.748	135.53	152.721	148.384	107.584	109.241	112.662	117.714
ENSG00000188295	ZNF669	29.3869	0.655107	0.29446	2.22477	0.0260966	0.983723	25.489	24.9825	18.7964	21.8771	33.4382	32.8897	39.4896	38.1328
ENSG00000279289	AL136164.3	6.82813	-1.93558	0.874143	-2.21427	0.0268105	0.983723	28.6751	5.62107	2.34955	6.65825	1.45384	7.0478	1.16146	1.65795
ENSG00000115884	SDC1	61.7604	-0.491588	0.222123	-2.21313	0.0268885	0.983723	66.9087	74.9476	71.6613	75.1431	58.8804	50.5092	48.7813	47.2516
ENSG00000006704	GTF2IRD1	12.3407	-1.00629	0.45523	-2.21051	0.0270698	0.983723	12.7445	20.6106	14.0973	18.0724	10.1769	11.7463	4.64584	6.6318
ENSG00000134198	TSPAN2	87.7341	-0.578065	0.261982	-2.20651	0.0273485	0.983723	129.038	87.4389	90.4577	114.141	49.4304	71.6526	68.5261	91.1872
ENSG00000088854	C20orf194	44.2212	-0.815618	0.370182	-2.20329	0.0275744	0.983723	78.0601	46.2177	54.0397	49.4613	47.2497	25.8419	13.9375	38.9618
ENSG00000175455	CCDC14	52.7508	-0.534578	0.243161	-2.19845	0.0279171	0.983723	63.7225	54.337	57.564	74.1919	41.4343	48.16	39.4896	43.1067
ENSG00000166707	ZCCHC18	3.6083	1.94767	0.886443	2.19718	0.0280078	0.983723	3.18613	1.87369	0	0.951178	4.36151	7.0478	8.13022	3.3159
ENSG00000186280	KDM4D	2.25589	3.04716	1.38794	2.19546	0.0281308	0.983723	1.59306	0.624564	0	0	4.36151	2.34927	0	9.11872
ENSG00000146477	SLC22A3	20.9374	-1.13284	0.516814	-2.19197	0.0283818	0.983723	57.3503	27.4808	12.9225	18.0724	8.72302	14.0956	8.13022	20.7244
ENSG00000221923	ZNF880	69.8233	0.607603	0.278405	2.18245	0.0290766	0.983723	58.9434	65.5792	61.0883	35.1936	82.8687	83.399	106.854	64.66
ENSG00000259623	AC125257.1	20.7093	-1.1329	0.519794	-2.17951	0.0292936	0.983723	36.6405	14.365	16.4469	46.6077	10.9038	21.1434	4.64584	14.9215
ENSG00000246477	AF131216.1	1.51135	-3.20144	1.47086	-2.17658	0.0295119	0.983723	3.18613	0.624564	2.34955	4.75589	0	1.17463	0	0
ENSG00000235655	H3F3AP4	20.8883	1.05069	0.483567	2.1728	0.0297954	0.983723	9.55838	13.1158	12.9225	18.0724	22.5345	14.0956	56.9115	19.8954
ENSG00000158270	COLEC12	15.6525	-1.01283	0.46701	-2.16874	0.0301021	0.983723	28.6751	11.8667	18.7964	25.6818	16.7191	8.22243	6.96876	8.28975
ENSG00000115594	IL1R1	57.4156	-0.843428	0.388907	-2.16871	0.0301043	0.983723	54.1642	58.709	102.205	79.899	40.7074	64.6048	15.099	43.9357
ENSG00000237886	NALT1	1.37576	-3.0922	1.43075	-2.16124	0.0306768	0.983723	1.59306	1.87369	3.52433	2.85354	0	0	1.16146	0
ENSG00000075651	PLD1	98.495	-0.521382	0.241256	-2.16112	0.0306864	0.983723	82.8393	120.541	142.148	117.946	79.2341	96.3199	62.7188	86.2134
ENSG00000270362	HMGN3-AS1	3.24175	-2.14875	0.994864	-2.15985	0.0307844	0.983723	6.37225	1.24913	7.04866	6.65825	1.45384	0	2.32292	0.828975
ENSG00000178015	GPR150	1.93925	2.9264	1.35502	2.15967	0.0307984	0.983723	0	1.24913	0	0	3.63459	1.17463	6.96876	2.48692
ENSG00000119640	ACYP1	25.4618	1.21267	0.562028	2.15766	0.030954	0.983723	7.96532	13.7404	14.0973	24.7306	18.8999	15.2702	82.4637	26.5272
ENSG00000164754	RAD21	131.833	-0.608227	0.282206	-2.15526	0.0311415	0.983723	211.877	119.916	158.595	148.384	105.403	130.384	61.5574	118.543
ENSG00000162745	OLFML2B	1.55637	-3.29697	1.52981	-2.15514	0.0311507	0.983723	6.37225	2.49825	0	2.85354	0.726918	0	0	0
ENSG00000160194	NDUFV3	149.461	0.51016	0.236769	2.15467	0.0311875	0.983723	98.7699	142.401	128.051	121.751	166.464	143.305	241.584	153.36
ENSG00000169814	BTD	130.677	0.500348	0.232475	2.15226	0.0313766	0.983723	103.549	127.411	126.876	74.1919	136.661	146.829	176.542	153.36
ENSG00000137393	RNF144B	35.5135	-0.646771	0.300612	-2.15151	0.0314358	0.983723	43.0127	39.9721	39.9424	49.4613	18.8999	37.5883	27.875	27.3562
ENSG00000121989	ACVR2A	21.1297	-0.804736	0.375231	-2.14464	0.0319817	0.983723	28.6751	19.986	27.0198	32.3401	15.9922	21.1434	8.13022	15.7505
ENSG00000134287	ARF3	120.241	-0.416811	0.194353	-2.14461	0.0319837	0.983723	138.597	130.534	152.721	129.36	107.584	110.416	82.4637	110.254
ENSG00000168569	TMEM223	52.239	0.756908	0.352959	2.14446	0.0319959	0.983723	33.4543	50.5897	25.8451	43.7542	49.4304	45.8107	106.854	62.1731
ENSG00000157379	DHRS1	135.365	0.595802	0.277924	2.14376	0.0320521	0.983723	82.8393	131.783	124.526	90.362	159.922	116.289	234.615	142.584
ENSG00000231365	AL359915.2	7.48316	-1.43827	0.671763	-2.14104	0.0322706	0.983723	22.3029	4.99651	4.6991	12.3653	4.36151	2.34927	4.64584	4.14487
ENSG00000124596	OARD1	82.4754	0.866197	0.405329	2.13702	0.0325962	0.983723	39.8266	71.8248	79.8848	40.9007	77.7802	77.5258	203.256	68.8049
ENSG00000154188	ANGPT1	91.8026	-0.50696	0.238079	-2.12938	0.0332228	0.983723	106.735	83.067	135.099	106.532	72.6918	92.796	72.0105	65.489
ENSG00000268543	AC012313.4	2.32962	-2.54781	1.19745	-2.1277	0.0333616	0.983723	6.37225	5.62107	1.17478	2.85354	1.45384	0	1.16146	0
ENSG00000227540	AC016394.1	5.31939	1.42005	0.667762	2.12658	0.0334553	0.983723	3.18613	3.12282	2.34955	2.85354	7.26918	4.69853	11.6146	7.46077
ENSG00000065457	ADAT1	97.2487	-0.438205	0.20662	-2.12083	0.0339364	0.983723	117.887	102.428	104.555	123.653	77.0533	84.5736	70.8491	96.99
ENSG00000135870	RC3H1	77.3829	-0.788141	0.371723	-2.12024	0.033986	0.983723	106.735	83.067	123.351	79.899	61.788	75.1765	18.5834	70.4628
ENSG00000164080	RAD54L2	79.1919	-0.706932	0.33366	-2.11872	0.0341144	0.983723	109.921	96.8074	96.3316	91.3131	82.8687	63.4302	23.2292	69.6339
ENSG00000143507	DUSP10	103.109	0.551473	0.260449	2.11739	0.0342267	0.983723	74.874	107.425	75.1857	75.1431	116.307	92.796	169.573	113.57
ENSG00000171346	KRT15	6.88987	1.56581	0.740536	2.11443	0.0344784	0.983723	6.37225	3.74738	0	3.80471	5.08843	9.39707	20.9063	5.80282
ENSG00000196689	TRPV1	2.2553	2.99246	1.41583	2.11358	0.0345514	0.983723	1.59306	0.624564	0	0	1.45384	9.39707	0	4.97385
ENSG00000154736	ADAMTS5	41.0623	-0.639263	0.303008	-2.10973	0.0348819	0.983723	46.1988	49.9651	41.1172	61.8266	31.9844	46.9853	25.5521	24.8692
ENSG00000145425	RPS3A	124.072	0.566162	0.268424	2.10921	0.0349265	0.983723	84.4324	120.541	99.8559	93.2155	117.761	119.813	221.839	135.123
ENSG00000168661	ZNF30	20.8432	-0.861295	0.408715	-2.10732	0.0350895	0.983723	22.3029	28.1054	17.6216	38.9983	18.173	21.1434	10.4531	9.9477
ENSG00000103227	LMF1	125.228	0.407528	0.19345	2.10664	0.035149	0.983723	101.956	123.664	105.73	97.9714	158.468	146.829	142.86	124.346
ENSG00000134508	CABLES1	39.3146	-0.631343	0.299775	-2.10605	0.0351998	0.983723	43.0127	58.0844	35.2433	53.266	26.896	42.2868	26.7136	29.0141
ENSG00000177602	HASPIN	2.58365	2.18472	1.03778	2.10518	0.0352758	0.983723	0	1.24913	2.34955	0	5.08843	3.5239	3.48438	4.97385
ENSG00000214894	LINC00243	2.5438	2.2351	1.06392	2.10081	0.0356573	0.983723	0	1.24913	0	1.90236	6.54226	3.5239	4.64584	2.48692
ENSG00000006606	CCL26	15.7538	1.04111	0.49563	2.10058	0.035678	0.983723	9.55838	8.74389	16.4469	6.65825	19.6268	11.7463	38.3282	14.9215
ENSG00000272674	PCDHB16	3.9436	1.71932	0.818595	2.10034	0.0356993	0.983723	3.18613	1.24913	2.34955	0.951178	3.63459	9.39707	5.8073	4.97385
ENSG00000240350	AC017002.3	4.61054	1.92894	0.918544	2.1	0.035729	0.983723	1.59306	2.49825	2.34955	0.951178	2.90767	3.5239	19.7448	3.3159
ENSG00000079459	FDFT1	2276.51	0.498988	0.238104	2.09567	0.0361116	0.983723	1795.38	2013.59	1965.4	1771.09	2328.32	2135.48	4026.78	2176.06
ENSG00000206530	CFAP44	5.16752	-1.55776	0.743654	-2.09474	0.036194	0.983723	14.3376	4.99651	8.22343	3.80471	3.63459	3.5239	1.16146	1.65795
ENSG00000260549	MT1L	33.8669	0.883147	0.421611	2.0947	0.0361981	0.983723	22.3029	27.4808	24.6703	19.9747	35.619	32.8897	84.7866	23.2113
ENSG00000262655	SPON1	3.15969	-2.1005	1.00355	-2.09308	0.0363422	0.983723	6.37225	4.99651	8.22343	0.951178	0.726918	2.34927	0	1.65795
ENSG00000130159	ECSIT	63.0557	0.593894	0.283786	2.09275	0.0363716	0.983723	50.978	58.709	49.3406	40.9007	59.6073	64.6048	111.5	68.8049
ENSG00000120318	ARAP3	9.79129	-1.1121	0.531439	-2.09263	0.0363823	0.983723	11.1514	11.2421	17.6216	14.2677	8.72302	5.87317	1.16146	8.28975
ENSG00000064199	SPA17	14.0975	0.920739	0.440221	2.09154	0.0364798	0.983723	7.96532	7.49476	12.9225	10.463	15.9922	18.7941	26.7136	12.4346
ENSG00000254837	AP001372.2	15.4704	0.947256	0.453506	2.08874	0.0367311	0.983723	14.3376	13.7404	8.22343	5.70707	14.5384	17.6195	31.3594	18.2374
ENSG00000188283	ZNF383	14.554	0.873318	0.418128	2.08864	0.0367403	0.983723	17.5237	8.11933	8.22343	8.56061	18.8999	17.6195	20.9063	16.5795
ENSG00000153898	MCOLN2	12.4512	-1.30491	0.62502	-2.08779	0.0368165	0.983723	15.9306	5.62107	30.5442	19.0236	2.90767	3.5239	10.4531	11.6056
ENSG00000175213	ZNF408	72.5322	0.527511	0.252821	2.0865	0.0369335	0.983723	43.0127	80.5687	56.3892	55.1684	86.5033	75.1765	90.5939	92.8452
ENSG00000253729	PRKDC	139.245	-0.40037	0.191974	-2.08554	0.0370201	0.983723	172.051	131.783	162.119	169.31	114.126	130.384	105.693	128.491
ENSG00000244675	AC108676.1	6.97774	1.25723	0.602914	2.08525	0.0370465	0.983723	3.18613	4.99651	1.17478	6.65825	10.1769	9.39707	6.96876	13.2636
ENSG00000163602	RYBP	14.9865	-1.09567	0.525904	-2.08341	0.0372141	0.983723	35.0474	18.7369	8.22343	19.9747	5.08843	12.921	5.8073	14.0926
ENSG00000150667	FSIP1	6.94947	-1.27565	0.613542	-2.07916	0.0376031	0.983723	9.55838	6.24564	11.7478	12.3653	6.54226	1.17463	4.64584	3.3159
ENSG00000144741	SLC25A26	124.049	0.492214	0.236922	2.07754	0.037752	0.983723	87.6185	123.664	104.555	94.1667	138.114	135.083	193.964	115.227
ENSG00000197579	TOPORS	195.318	-0.364385	0.175527	-2.07595	0.0378981	0.983723	234.18	202.359	216.159	227.332	159.922	198.513	147.505	176.572
ENSG00000245532	NEAT1	65.1549	0.540229	0.260463	2.07411	0.0380689	0.983723	74.874	44.344	42.2919	53.266	77.7802	83.399	61.5574	83.7264
ENSG00000214439	FAM185BP	1.78639	2.64736	1.27695	2.07319	0.0381547	0.983723	0	0.624564	1.17478	0	2.18075	2.34927	4.64584	3.3159
ENSG00000164086	DUSP7	24.6235	0.773624	0.373248	2.07268	0.0382021	0.983723	9.55838	17.4878	21.146	23.7795	34.1652	39.9375	18.5834	32.33
ENSG00000046604	DSG2	43.8276	-0.824683	0.39815	-2.07129	0.038332	0.983723	58.9434	49.9651	63.4379	52.3148	32.7113	46.9853	8.13022	38.1328
ENSG00000166394	CYB5R2	9.31477	1.26266	0.609636	2.07116	0.0383434	0.983723	7.96532	3.12282	4.6991	6.65825	12.3576	5.87317	25.5521	8.28975
ENSG00000147155	EBP	590.435	0.605232	0.292234	2.07105	0.0383543	0.983723	446.058	508.395	500.455	417.567	574.265	493.346	1205.6	577.795
ENSG00000070610	GBA2	179.459	-0.522556	0.252385	-2.07047	0.0384086	0.983723	251.704	206.731	170.342	218.771	154.834	179.719	89.4324	164.137
ENSG00000188130	MAPK12	114.41	0.440047	0.212557	2.07026	0.0384284	0.983723	79.6532	116.793	81.0595	108.434	130.845	123.337	130.084	145.071
ENSG00000160752	FDPS	778.618	0.563832	0.272558	2.06867	0.0385772	0.983723	584.654	713.252	616.757	597.34	809.787	687.161	1502.93	717.063
ENSG00000114739	ACVR2B	1.3492	-3.18901	1.54223	-2.06779	0.0386595	0.983723	1.59306	6.24564	1.17478	0.951178	0	0	0	0.828975
ENSG00000265962	GACAT2	5.23038	1.6152	0.781226	2.06752	0.038685	0.983723	4.77919	2.49825	2.34955	0.951178	5.81535	5.87317	16.2604	3.3159
ENSG00000117399	CDC20	5.33779	-1.46593	0.70909	-2.06733	0.0387028	0.983723	6.37225	6.24564	11.7478	7.60943	5.08843	0	2.32292	3.3159
ENSG00000155621	C9orf85	40.936	0.720944	0.348909	2.06628	0.0388017	0.983723	25.489	34.351	35.2433	27.5842	34.8921	35.239	82.4637	52.2254
ENSG00000133027	PEMT	99.4571	0.584824	0.283852	2.06031	0.0393685	0.983723	65.3156	84.9407	84.5839	81.8014	98.8609	97.4946	188.157	94.5031
ENSG00000079257	LXN	73.3692	0.780004	0.378871	2.05876	0.0395175	0.983723	25.489	63.0809	81.0595	44.7054	73.4187	82.2243	149.828	67.1469
ENSG00000107331	ABCA2	36.9706	-0.79741	0.387425	-2.05823	0.0395678	0.983723	60.5364	39.9721	41.1172	47.5589	33.4382	29.3658	8.13022	35.6459
ENSG00000173727	AP000769.1	19.4661	0.890925	0.432963	2.05774	0.0396151	0.983723	12.7445	13.1158	14.0973	14.2677	18.8999	14.0956	45.2969	23.2113
ENSG00000160326	SLC2A6	413.198	0.301021	0.146337	2.05704	0.0396826	0.983723	364.812	385.356	382.977	348.131	445.601	439.313	426.256	513.135
ENSG00000173269	MMRN2	2.65164	-2.18767	1.06363	-2.0568	0.0397052	0.983723	3.18613	3.12282	2.34955	8.56061	0	1.17463	1.16146	1.65795
ENSG00000246130	AC107959.2	0.929789	3.30146	1.60516	2.05678	0.039707	0.983723	0	0	0	0	1.45384	1.17463	2.32292	2.48692
ENSG00000233554	B4GALT1-AS1	11.9829	1.09387	0.532241	2.05521	0.0398583	0.983723	9.55838	11.8667	4.6991	3.80471	12.3576	14.0956	27.875	11.6056
ENSG00000196605	ZNF846	38.6792	0.752245	0.366062	2.05496	0.0398825	0.983723	27.0821	34.9756	16.4469	35.1936	35.619	46.9853	76.6564	36.4749
ENSG00000142528	ZNF473	37.8695	-0.714747	0.3483	-2.0521	0.04016	0.983723	44.6058	38.0984	55.2145	50.4125	28.3498	45.8107	13.9375	26.5272
ENSG00000104863	LIN7B	22.7379	0.792904	0.386856	2.04961	0.0404024	0.983723	17.5237	14.365	17.6216	17.1212	23.9883	18.7941	47.6199	24.8692
ENSG00000258056	AC009779.2	19.4266	0.755088	0.368876	2.04699	0.0406586	0.983723	14.3376	15.6141	9.39821	18.0724	29.0767	21.1434	27.875	19.8954
ENSG00000115290	GRB14	47.1875	0.738896	0.361245	2.04542	0.0408137	0.983723	41.4197	29.3545	43.4667	27.5842	47.9766	50.5092	99.8856	37.3039
ENSG00000188002	AC026412.1	27.9402	0.786454	0.384836	2.04361	0.0409923	0.983723	23.896	19.986	14.0973	23.7795	22.5345	25.8419	56.9115	36.4749
ENSG00000127481	UBR4	129.114	-0.519686	0.254367	-2.04305	0.0410471	0.983723	162.492	118.667	163.294	165.505	105.403	124.511	66.2032	126.833
ENSG00000070759	TESK2	2.41211	2.22162	1.08768	2.04253	0.0410989	0.983723	0	1.87369	0	0.951178	5.81535	3.5239	4.64584	2.48692
ENSG00000164818	DNAAF5	36.9147	-0.580159	0.284248	-2.04103	0.0412477	0.983723	46.1988	40.5966	39.9424	50.4125	31.9844	37.5883	22.0677	26.5272
ENSG00000197147	LRRC8B	5.39421	-1.76484	0.865196	-2.03981	0.0413689	0.983723	4.77919	7.49476	5.87388	15.2189	5.08843	4.69853	0	0
ENSG00000178096	BOLA1	42.0017	0.611526	0.29992	2.03896	0.0414537	0.983723	27.0821	38.723	36.4181	29.4865	45.7958	37.5883	72.0105	48.9095
ENSG00000132122	SPATA6	12.1772	1.27341	0.624573	2.03885	0.0414651	0.983723	14.3376	6.8702	3.52433	4.75589	13.8114	4.69853	16.2604	33.159
ENSG00000176678	FOXL1	52.7871	-0.664216	0.325784	-2.03882	0.0414678	0.983723	39.8266	75.5722	82.2343	60.8754	49.4304	50.5092	23.2292	40.6198
ENSG00000258947	TUBB3	2.51169	2.33445	1.146	2.03703	0.0416465	0.983723	1.59306	0	1.17478	0.951178	2.18075	8.22243	3.48438	2.48692
ENSG00000272138	LINC01607	0.886762	-3.32568	1.63317	-2.03633	0.0417169	0.983723	1.59306	1.24913	2.34955	1.90236	0	0	0	0
ENSG00000103657	HERC1	53.8808	-0.733732	0.360559	-2.03499	0.0418521	0.983723	79.6532	43.7195	78.71	68.4849	38.5267	48.16	17.4219	56.3703
ENSG00000174886	NDUFA11	39.6451	0.765056	0.376304	2.03308	0.0420443	0.983723	17.5237	49.3405	17.6216	30.4377	50.1574	41.1122	66.2032	44.7646
ENSG00000257365	FNTB	57.8133	0.580291	0.285689	2.0312	0.0422345	0.983723	33.4543	54.337	52.8649	43.7542	79.961	81.0497	44.1355	72.9498
ENSG00000162645	GBP2	64.6956	-0.532389	0.262151	-2.03085	0.0422704	0.983723	95.5838	84.3161	71.6613	55.1684	49.4304	59.9063	41.8126	59.6862
ENSG00000248079	DPH6-AS1	7.03077	-1.2714	0.626428	-2.0296	0.0423977	0.983723	6.37225	9.99302	15.2721	7.60943	3.63459	8.22243	3.48438	1.65795
ENSG00000166920	C15orf48	10.8522	1.29003	0.635677	2.02939	0.042419	0.983723	6.37225	5.62107	9.39821	3.80471	9.44994	7.0478	36.0053	9.11872
ENSG00000121361	KCNJ8	11.0309	1.16641	0.574952	2.0287	0.0424888	0.983723	0	8.11933	9.39821	8.56061	18.173	17.6195	19.7448	6.6318
ENSG00000178562	CD28	2.77866	-2.37176	1.17074	-2.02586	0.0427789	0.983723	4.77919	0.624564	5.87388	7.60943	2.18075	0	1.16146	0
ENSG00000104983	CCDC61	11.352	-1.06233	0.524454	-2.02559	0.0428069	0.983723	9.55838	19.3615	22.3207	9.51178	7.26918	5.87317	12.7761	4.14487
ENSG00000115286	NDUFS7	64.4077	0.667019	0.329311	2.0255	0.0428158	0.983723	39.8266	63.0809	46.991	47.5589	65.4226	50.5092	128.922	72.9498
ENSG00000165029	ABCA1	130.962	-0.70063	0.346336	-2.02298	0.0430753	0.983723	192.761	114.295	171.517	171.212	111.218	138.607	39.4896	108.596
ENSG00000094880	CDC23	268.239	-0.336135	0.166171	-2.02283	0.0430907	0.983723	318.613	275.433	296.044	308.182	236.248	274.864	204.417	232.113
ENSG00000122378	FAM213A	169.75	0.451149	0.223244	2.02087	0.043293	0.983723	143.376	139.902	135.099	154.091	167.918	192.64	268.297	156.676
ENSG00000135678	CPM	8.4496	1.17455	0.581365	2.02032	0.0433497	0.983723	3.18613	4.37195	8.22343	4.75589	5.81535	9.39707	18.5834	13.2636
ENSG00000158458	NRG2	1.39606	-3.0738	1.52627	-2.01392	0.0440178	0.983723	1.59306	0.624564	5.87388	1.90236	0	1.17463	0	0
ENSG00000110455	ACCS	55.9755	-0.521229	0.259042	-2.01214	0.0442047	0.983723	74.874	76.1968	57.564	56.1195	55.9727	45.8107	34.8438	46.4226
ENSG00000143373	ZNF687	2.73744	-1.97105	0.979832	-2.01162	0.0442601	0.983723	4.77919	6.24564	4.6991	1.90236	1.45384	0	1.16146	1.65795
ENSG00000005486	RHBDD2	502.039	0.421009	0.209402	2.01053	0.0443748	0.983723	366.405	494.03	480.483	373.813	527.743	547.379	745.657	480.805
ENSG00000002016	RAD52	15.9434	-0.845511	0.420811	-2.00924	0.0445112	0.983723	20.7098	17.4878	16.4469	26.633	7.9961	10.5717	18.5834	9.11872
ENSG00000159167	STC1	106.113	0.546413	0.272159	2.0077	0.0446749	0.983723	73.2809	64.9546	104.555	101.776	106.13	124.511	174.219	99.477
ENSG00000153391	INO80C	58.5642	0.910712	0.453771	2.00699	0.0447509	0.983723	36.6405	43.0949	42.2919	39.9495	58.8804	41.1122	168.412	38.1328
ENSG00000233532	LINC00460	33.0319	0.705204	0.351516	2.00618	0.044837	0.983723	19.1168	24.9825	31.7189	23.7795	34.8921	32.8897	66.2032	30.6721
ENSG00000071575	TRIB2	60.1451	-0.676733	0.337433	-2.00553	0.0449061	0.983723	98.7699	54.337	56.3892	88.4596	58.1535	43.4614	24.3907	57.1993
ENSG00000197119	SLC25A29	38.0241	0.577858	0.288238	2.0048	0.0449849	0.983723	25.489	32.4773	37.5928	26.633	50.1574	42.2868	34.8438	54.7123
ENSG00000204387	C6orf48	159.454	0.60902	0.303968	2.00356	0.0451167	0.983723	105.142	156.765	129.225	112.239	174.46	140.956	315.917	140.926
ENSG00000153904	DDAH1	243.382	-0.46485	0.232098	-2.00282	0.0451969	0.983723	367.998	241.706	210.285	311.035	203.537	214.958	163.766	233.771
ENSG00000106785	TRIM14	28.4806	-0.679341	0.339349	-2.0019	0.0452958	0.983723	33.4543	39.3475	42.2919	24.7306	21.8075	31.7151	16.2604	18.2374
ENSG00000161281	COX7A1	152.748	0.643815	0.321629	2.00173	0.0453133	0.983723	105.142	146.772	113.953	109.386	159.922	136.257	322.886	127.662
ENSG00000198576	ARC	3.13733	-2.16265	1.08046	-2.00161	0.0453267	0.983723	1.59306	2.49825	11.7478	4.75589	2.18075	0	2.32292	0
ENSG00000184428	TOP1MT	44.7174	0.758705	0.379104	2.00131	0.0453589	0.983723	17.5237	55.5862	25.8451	31.3889	45.7958	41.1122	76.6564	63.831
ENSG00000184227	ACOT1	97.9067	0.484256	0.242037	2.00076	0.0454186	0.983723	70.0948	102.428	82.2343	69.436	106.857	105.717	148.667	97.819
ENSG00000124678	TCP11	1.3888	-3.13841	1.56864	-2.00072	0.0454226	0.983723	3.18613	2.49825	4.6991	0	0.726918	0	0	0
ENSG00000178502	KLHL11	20.4939	-0.850436	0.425161	-2.00027	0.0454715	0.983723	36.6405	16.8632	21.146	32.3401	16.7191	9.39707	9.29168	21.5533
ENSG00000166435	XRRA1	39.3566	-0.669632	0.334823	-1.99996	0.0455051	0.983723	35.0474	47.4668	70.4866	40.9007	39.9805	31.7151	18.5834	30.6721
ENSG00000076604	TRAF4	26.4339	-0.666932	0.334077	-1.99634	0.0458969	0.983723	31.8613	31.8527	36.4181	30.4377	23.2614	22.318	10.4531	24.8692
ENSG00000158406	HIST1H4H	102.31	0.51485	0.258062	1.99507	0.0460355	0.983723	79.6532	95.5582	74.0109	86.5572	116.307	84.5736	170.735	111.083
ENSG00000133935	ERG28	507.647	0.505007	0.253147	1.99491	0.0460524	0.983723	426.941	459.679	439.366	351.936	548.096	479.25	902.455	453.449
ENSG00000072133	RPS6KA6	7.2956	-1.95381	0.979408	-1.99489	0.0460552	0.983723	27.0821	3.74738	0	16.17	6.54226	1.17463	1.16146	2.48692
ENSG00000128581	IFT22	126.448	0.551463	0.276638	1.99345	0.0462123	0.983723	95.5838	119.292	91.6325	101.776	106.857	142.131	229.969	124.346
ENSG00000136014	USP44	2.05588	-2.29035	1.14929	-1.99284	0.046279	0.983723	4.77919	3.74738	2.34955	2.85354	0.726918	0	1.16146	0.828975
ENSG00000261971	MMP25-AS1	9.29381	-1.25258	0.628575	-1.99273	0.0462914	0.983723	7.96532	9.36846	22.3207	13.3165	5.08843	3.5239	1.16146	11.6056
ENSG00000187801	ZFP69B	19.8772	0.7448	0.373768	1.99268	0.0462962	0.983723	15.9306	17.4878	12.9225	13.3165	27.6229	22.318	16.2604	33.159
ENSG00000136932	TRMO	56.2191	0.714589	0.358857	1.99129	0.0464489	0.983723	44.6058	54.337	18.7964	51.3636	66.8765	54.0331	103.37	56.3703
ENSG00000171858	RPS21	295.315	0.645246	0.324852	1.98628	0.0470025	0.983723	183.202	277.931	225.557	233.039	318.39	220.831	628.35	275.22
ENSG00000156313	RPGR	26.7438	0.69711	0.351086	1.98558	0.0470796	0.983723	22.3029	27.4808	14.0973	17.1212	37.7997	23.4927	41.8126	29.8431
ENSG00000234618	RPSAP9	2.48301	2.03105	1.02296	1.98545	0.047094	0.983723	1.59306	1.24913	1.17478	0	4.36151	3.5239	4.64584	3.3159
ENSG00000173614	NMNAT1	52.6446	0.547823	0.275972	1.98507	0.0471371	0.983723	49.385	47.4668	38.7676	35.1936	48.7035	52.8585	82.4637	66.318
ENSG00000198932	GPRASP1	4.92803	-2.00335	1.0095	-1.98449	0.0472011	0.983723	9.55838	5.62107	8.22343	8.56061	0	0	0	7.46077
ENSG00000197982	C1orf122	289.728	0.524321	0.264438	1.98277	0.0473927	0.983723	218.25	260.443	218.508	252.062	312.575	232.577	524.98	298.431
ENSG00000178691	SUZ12	50.4622	-0.59026	0.297837	-1.98182	0.0474991	0.983723	66.9087	65.5792	45.8163	64.6801	42.8882	49.3346	22.0677	46.4226
ENSG00000151743	AMN1	37.7277	0.618511	0.312096	1.9818	0.0475018	0.983723	31.8613	28.7299	29.3694	29.4865	48.7035	27.0166	62.7188	43.9357
ENSG00000256235	SMIM3	271.673	0.362452	0.183058	1.97998	0.0477056	0.983723	230.994	234.211	260.8	224.478	300.217	268.991	380.959	272.733
ENSG00000100852	ARHGAP5	146.37	-0.530797	0.268268	-1.97861	0.0478603	0.983723	192.761	156.141	164.469	179.773	119.215	146.829	65.0418	146.729
ENSG00000125538	IL1B	354.095	1.00994	0.510941	1.97662	0.0480849	0.983723	151.341	247.327	279.597	260.623	282.771	247.848	1185.85	177.401
ENSG00000164366	CCDC127	139.899	0.579341	0.293098	1.97661	0.0480852	0.983723	92.3977	113.671	135.099	106.532	162.103	126.86	264.813	117.714
ENSG00000167528	ZNF641	46.8464	-0.645692	0.327048	-1.97431	0.0483469	0.983723	76.4671	49.9651	56.3892	47.5589	48.7035	42.2868	18.5834	34.8169
ENSG00000066933	MYO9A	45.2517	-0.635672	0.322019	-1.97402	0.0483793	0.983723	35.0474	64.3301	56.3892	63.729	31.2575	41.1122	22.0677	48.0805
ENSG00000180777	ANKRD30B	4.31461	1.69536	0.859038	1.97355	0.0484324	0.983723	3.18613	1.87369	1.17478	1.90236	2.90767	7.0478	13.9375	2.48692
ENSG00000071205	ARHGAP10	84.7031	-0.628611	0.318769	-1.97199	0.0486105	0.983723	114.701	75.5722	97.5064	124.604	64.6957	89.2721	32.5209	78.7526
ENSG00000124356	STAMBP	222.644	0.314214	0.159388	1.97137	0.0486813	0.983723	208.691	188.618	214.984	182.626	237.702	243.149	268.297	237.087
ENSG00000234155	LINC02535	11.0438	-1.05836	0.536934	-1.97111	0.0487108	0.983723	7.96532	13.1158	17.6216	19.9747	3.63459	14.0956	6.96876	4.97385
ENSG00000120699	EXOSC8	162.699	0.546229	0.277401	1.96909	0.0489424	0.983723	137.003	137.404	129.225	124.604	160.649	153.877	311.271	147.557
ENSG00000119862	LGALSL	39.7688	-0.600434	0.305081	-1.96811	0.0490549	0.983723	63.7225	48.716	30.5442	48.5101	24.7152	37.5883	33.6823	30.6721
ENSG00000170500	LONRF2	1.98478	-2.81745	1.43321	-1.96583	0.0493183	0.983723	0	3.12282	4.6991	5.70707	0	2.34927	0	0
ENSG00000185519	FAM131C	3.67709	-1.65241	0.841888	-1.96274	0.0496764	0.983723	6.37225	3.12282	5.87388	6.65825	0.726918	2.34927	3.48438	0.828975
ENSG00000228997	AL136452.1	8.77634	1.17598	0.599307	1.96224	0.0497351	0.983723	4.77919	6.24564	2.34955	7.60943	10.1769	5.87317	23.2292	9.9477
ENSG00000123485	HJURP	5.74062	-1.51981	0.774549	-1.96219	0.0497404	0.983723	7.96532	4.99651	15.2721	6.65825	6.54226	1.17463	0	3.3159
ENSG00000133805	AMPD3	59.3344	-0.612242	0.312065	-1.9619	0.0497738	0.983723	41.4197	70.5757	71.6613	102.727	44.342	42.2868	39.4896	62.1731
ENSG00000212747	RTL8B	71.5813	0.479884	0.24467	1.96135	0.0498378	0.983723	54.1642	79.3196	52.8649	50.4125	77.7802	88.0975	92.9168	77.0946
ENSG00000074935	TUBE1	117.548	0.396131	0.201997	1.96107	0.0498707	0.983723	87.6185	106.176	98.6812	111.288	126.484	138.607	157.959	113.57
ENSG00000261786	AC006058.1	2.42905	-2.05105	1.04624	-1.9604	0.0499487	0.983723	6.37225	3.12282	3.52433	2.85354	0.726918	1.17463	0	1.65795
ENSG00000175197	DDIT3	206.288	0.634435	0.324111	1.95746	0.0502932	0.983723	133.817	218.597	150.371	141.726	206.445	184.417	430.902	184.032
ENSG00000069275	NUCKS1	123.998	-0.523022	0.267201	-1.95741	0.0502994	0.983723	199.133	128.66	123.351	135.067	95.2263	135.083	68.5261	106.938
ENSG00000174371	EXO1	3.05709	-2.42868	1.24105	-1.95696	0.0503522	0.983723	14.3376	1.87369	4.6991	0	0.726918	0	1.16146	1.65795
ENSG00000136942	RPL35	470.612	0.70756	0.361782	1.95576	0.050493	0.983723	274.007	466.549	359.481	328.157	505.208	327.723	1091.77	412
ENSG00000101901	ALG13	43.0232	0.645062	0.329978	1.95486	0.0505992	0.983723	36.6405	34.9756	24.6703	37.096	37.0728	48.16	82.4637	43.1067
ENSG00000230330	HMGN2P3	1.69349	2.51562	1.28734	1.95412	0.0506865	0.983723	1.59306	0.624564	0	0	2.18075	2.34927	3.48438	3.3159
ENSG00000177374	HIC1	6.51086	-1.35234	0.692861	-1.95182	0.0509595	0.983723	3.18613	6.24564	17.6216	10.463	2.90767	4.69853	1.16146	5.80282
ENSG00000176927	EFCAB5	5.19329	1.28601	0.659686	1.94943	0.0512442	0.983723	4.77919	2.49825	2.34955	2.85354	7.26918	5.87317	9.29168	6.6318
ENSG00000110031	LPXN	229.113	0.671546	0.344499	1.94934	0.0512549	0.983723	183.202	179.25	182.09	161.7	212.26	218.482	528.464	167.453
ENSG00000240344	PPIL3	102.997	0.628472	0.323065	1.94534	0.0517339	0.983723	76.4671	87.4389	74.0109	84.6549	98.8609	82.2243	218.355	101.964
ENSG00000235381	AL596202.1	1.35011	-3.01511	1.54995	-1.94529	0.0517398	0.983723	6.37225	0.624564	1.17478	1.90236	0.726918	0	0	0
ENSG00000100075	SLC25A1	2006.74	0.380633	0.19567	1.94528	0.0517414	0.983723	1599.44	1921.16	1792.71	1658.86	2108.79	1921.7	3041.86	2009.43
ENSG00000130513	GDF15	1074.56	0.535992	0.275741	1.94382	0.0519166	0.983723	767.857	1024.91	896.354	818.014	1131.08	926.786	2049.98	981.506
ENSG00000162746	FCRLB	12.8731	0.917759	0.472178	1.94367	0.0519354	0.983723	9.55838	13.1158	7.04866	5.70707	25.4421	12.921	15.099	14.0926
ENSG00000153989	NUS1	63.3103	-0.574439	0.295547	-1.94365	0.0519378	0.983723	84.4324	63.0809	75.1857	81.8014	56.6996	57.557	25.5521	62.1731
ENSG00000120658	ENOX1	59.6845	0.46553	0.239763	1.94163	0.052182	0.983723	36.6405	50.5897	56.3892	55.1684	64.6957	74.0019	77.8178	62.1731
ENSG00000134897	BIVM	43.3143	-0.541992	0.279415	-1.93974	0.0524116	0.983723	52.5711	37.4738	52.8649	63.729	39.9805	32.8897	31.3594	35.6459
ENSG00000218739	CEBPZOS	107.677	0.602306	0.310831	1.93773	0.0526566	0.983723	105.142	99.3056	71.6613	65.6313	98.8609	99.8438	209.063	111.912
ENSG00000272853	AC069544.1	1.35864	3.04209	1.57211	1.93503	0.0529863	0.983723	0	0.624564	0	0	1.45384	0	4.64584	4.14487
ENSG00000145908	ZNF300	15.5236	-1.00689	0.520487	-1.93451	0.0530506	0.983723	36.6405	16.8632	18.7964	11.4141	13.0845	16.4449	3.48438	7.46077
ENSG00000183828	NUDT14	169.255	0.58183	0.300885	1.93373	0.0531463	0.983723	132.224	151.769	126.876	130.311	166.464	140.956	343.792	161.65
ENSG00000170439	METTL7B	9.45651	1.00076	0.518046	1.93179	0.0533854	0.983723	4.77919	5.62107	8.22343	6.65825	13.8114	5.87317	17.4219	13.2636
ENSG00000169247	SH3TC2	11.0024	-1.13554	0.587934	-1.93141	0.0534327	0.983723	12.7445	18.7369	18.7964	10.463	10.9038	10.5717	0	5.80282
ENSG00000214389	RPS3AP26	0.923692	3.24328	1.67952	1.93108	0.0534736	0.983723	0	0	0	0	0.726918	2.34927	3.48438	0.828975
ENSG00000144868	TMEM108	2.26274	-2.10255	1.08956	-1.92972	0.0536421	0.983723	3.18613	3.74738	2.34955	5.70707	1.45384	0	0	1.65795
ENSG00000169083	AR	3.11652	-1.84173	0.955505	-1.9275	0.0539174	0.983723	6.37225	8.11933	1.17478	3.80471	1.45384	2.34927	0	1.65795
ENSG00000164105	SAP30	52.131	0.692479	0.359507	1.92619	0.0540805	0.983723	43.0127	49.9651	34.0685	31.3889	37.0728	51.6839	106.854	63.0021
ENSG00000145934	TENM2	1.37216	-3.0656	1.59264	-1.92486	0.0542471	0.983723	6.37225	1.87369	0	1.90236	0	0	0	0.828975
ENSG00000226328	NUP50-AS1	24.9911	0.61865	0.321448	1.92457	0.0542828	0.983723	27.0821	19.986	16.4469	16.17	30.5306	27.0166	33.6823	29.0141
ENSG00000174917	C19orf70	314.261	0.628897	0.326861	1.92405	0.0543483	0.983723	210.284	306.036	237.305	232.088	338.017	243.149	673.647	273.562
ENSG00000169696	ASPSCR1	111.253	0.426956	0.22193	1.92383	0.0543759	0.983723	70.0948	113.046	105.73	88.4596	127.938	110.416	147.505	126.833
ENSG00000169914	OTUD3	13.9253	-0.939418	0.488472	-1.92318	0.0544579	0.983723	22.3029	10.6176	22.3207	19.0236	14.5384	3.5239	11.6146	7.46077
ENSG00000140534	TICRR	3.4001	-1.96424	1.02211	-1.92175	0.0546371	0.983723	7.96532	1.24913	7.04866	5.70707	2.90767	0	2.32292	0
ENSG00000232679	LINC01705	50.8109	0.96185	0.500799	1.92063	0.0547782	0.983723	41.4197	36.2247	30.5442	29.4865	55.9727	42.2868	149.828	20.7244
ENSG00000007047	MARK4	8.139	-1.01379	0.527987	-1.92011	0.0548445	0.983723	14.3376	12.4913	8.22343	8.56061	4.36151	4.69853	5.8073	6.6318
ENSG00000111707	SUDS3	142.19	-0.543601	0.283242	-1.91921	0.0549577	0.983723	216.657	141.776	157.42	159.798	110.492	166.798	68.5261	116.056
ENSG00000132792	CTNNBL1	216.643	0.38213	0.199127	1.91902	0.0549814	0.983723	173.644	176.752	176.216	224.478	223.891	227.879	308.948	221.336
ENSG00000100916	BRMS1L	58.3643	-0.535632	0.279198	-1.91846	0.0550522	0.983723	71.6879	53.0879	72.8361	78.9478	54.5189	56.3824	48.7813	30.6721
ENSG00000146700	SSC4D	5.68327	-1.30006	0.677779	-1.91812	0.0550955	0.983723	6.37225	6.24564	11.7478	8.56061	6.54226	2.34927	1.16146	2.48692
ENSG00000280670	CCDC163	3.13422	2.00051	1.044	1.9162	0.0553394	0.983723	0	3.12282	1.17478	0	2.90767	10.5717	2.32292	4.97385
ENSG00000284707	AC079781.5	1.58194	-2.55943	1.33701	-1.9143	0.0555823	0.983723	1.59306	3.74738	3.52433	1.90236	0.726918	0	1.16146	0
ENSG00000161267	BDH1	3.66388	1.70118	0.888959	1.91368	0.0556612	0.983723	0	0.624564	2.34955	3.80471	5.08843	2.34927	9.29168	5.80282
ENSG00000088305	DNMT3B	8.27152	1.19583	0.62522	1.91265	0.0557925	0.983723	7.96532	4.37195	5.87388	2.85354	15.9922	8.22243	3.48438	17.4085
ENSG00000170631	ZNF16	40.9799	-0.539854	0.282311	-1.91227	0.0558418	0.983723	55.7572	41.2212	52.8649	45.6566	36.3459	39.9375	22.0677	33.988
ENSG00000137133	HINT2	84.2432	0.650497	0.340316	1.91145	0.0559472	0.983723	60.5364	70.5757	65.7874	64.6801	111.218	63.4302	173.058	64.66
ENSG00000249679	AC106897.1	2.17836	2.21958	1.16121	1.91144	0.0559479	0.983723	1.59306	0.624564	1.17478	0	2.90767	1.17463	5.8073	4.14487
ENSG00000164542	KIAA0895	10.1265	-1.23653	0.647118	-1.91083	0.0560263	0.983723	12.7445	10.6176	9.39821	24.7306	7.26918	0	4.64584	11.6056
ENSG00000198542	ITGBL1	917.597	0.272157	0.142455	1.91047	0.0560726	0.983723	758.298	936.846	852.887	774.259	1024.95	1051.3	1010.47	931.768
ENSG00000188672	RHCE	6.57716	1.28046	0.670282	1.91032	0.0560916	0.983723	1.59306	3.12282	3.52433	6.65825	9.44994	5.87317	17.4219	4.97385
ENSG00000090520	DNAJB11	206.083	0.457439	0.239474	1.91018	0.05611	0.983723	151.341	196.738	162.119	182.626	226.072	180.894	339.146	209.731
ENSG00000272459	AC139795.3	2.25319	-2.24661	1.17676	-1.90915	0.0562431	0.983723	3.18613	1.87369	4.6991	4.75589	0	2.34927	1.16146	0
ENSG00000164074	ABHD18	28.1033	-0.588357	0.308294	-1.90843	0.0563354	0.983723	23.896	33.7264	36.4181	39.9495	21.0806	22.318	26.7136	20.7244
ENSG00000068394	GPKOW	127.152	0.479301	0.25126	1.90759	0.0564443	0.983723	82.8393	129.909	126.876	83.7037	141.749	113.939	182.349	155.847
ENSG00000123689	G0S2	101.612	0.839994	0.440458	1.90709	0.0565086	0.983723	57.3503	93.06	69.3118	70.3872	116.307	75.1765	274.105	57.1993
ENSG00000087152	ATXN7L3	30.9589	-0.650894	0.341858	-1.90399	0.0569113	0.983723	38.2335	39.3475	42.2919	32.3401	29.8036	27.0166	10.4531	28.1851
ENSG00000186908	ZDHHC17	201.307	-0.393508	0.206699	-1.90377	0.05694	0.983723	246.925	171.13	229.081	269.184	175.914	179.719	148.667	189.835
ENSG00000103496	STX4	77.5436	0.579845	0.304736	1.90278	0.0570692	0.983723	71.6879	64.9546	46.991	64.6801	74.8726	64.6048	146.344	86.2134
ENSG00000196422	PPP1R26	33.8879	-0.715006	0.376048	-1.90137	0.0572535	0.983723	60.5364	29.9791	38.7676	40.9007	31.2575	29.3658	10.4531	29.8431
ENSG00000196659	TTC30B	19.4056	-0.776944	0.408753	-1.90076	0.0573329	0.983723	28.6751	22.4843	22.3207	25.6818	17.446	14.0956	4.64584	19.8954
ENSG00000156795	WDYHV1	28.0864	0.743432	0.391399	1.89942	0.0575087	0.983723	28.6751	13.1158	30.5442	13.3165	31.2575	25.8419	48.7813	33.159
ENSG00000126870	WDR60	34.1286	-0.60606	0.319083	-1.89938	0.0575146	0.983723	28.6751	32.4773	56.3892	47.5589	31.9844	27.0166	23.2292	25.6982
ENSG00000151687	ANKAR	10.6757	-1.13573	0.598124	-1.89881	0.057589	0.983723	31.8613	11.8667	7.04866	8.56061	8.72302	8.22243	5.8073	3.3159
ENSG00000172493	AFF1	37.435	-0.534489	0.281505	-1.89868	0.0576064	0.983723	52.5711	39.9721	44.6415	40.9007	34.8921	36.4136	24.3907	25.6982
ENSG00000066739	ATG2B	65.7835	-0.56875	0.299624	-1.89821	0.0576683	0.983723	81.2462	59.9581	86.9334	87.5084	54.5189	61.0809	27.875	67.1469
ENSG00000173221	GLRX	792.632	0.709588	0.373944	1.89758	0.0577514	0.983723	575.096	710.129	586.213	533.611	733.46	637.826	1986.1	578.624
ENSG00000187840	EIF4EBP1	612.157	0.586023	0.309007	1.89647	0.0578982	0.983723	404.638	570.227	503.979	477.492	588.804	498.045	1278.77	575.308
ENSG00000001631	KRIT1	82.6896	-0.437179	0.230613	-1.89573	0.0579964	0.983723	101.956	84.3161	109.254	85.6061	77.7802	78.7004	70.8491	53.0544
ENSG00000107890	ANKRD26	32.4754	0.565493	0.29835	1.8954	0.0580392	0.983723	25.489	28.7299	27.0198	22.8283	39.9805	41.1122	46.4584	28.1851
ENSG00000157741	UBN2	9.5762	-1.08323	0.571595	-1.8951	0.0580797	0.983723	11.1514	11.2421	17.6216	12.3653	6.54226	9.39707	0	8.28975
ENSG00000137491	SLCO2B1	4.63768	1.42618	0.75273	1.89468	0.058135	0.983723	4.77919	2.49825	1.17478	1.90236	6.54226	11.7463	3.48438	4.97385
ENSG00000185043	CIB1	562.136	0.657115	0.346938	1.89404	0.0582194	0.983723	366.405	509.644	471.085	396.641	554.639	434.614	1297.35	466.713
ENSG00000182985	CADM1	26.4534	-0.800051	0.422443	-1.89387	0.0582427	0.983723	52.5711	29.9791	24.6703	28.5354	17.446	18.7941	8.13022	31.501
ENSG00000143353	LYPLAL1	233.439	0.573565	0.302997	1.89297	0.0583614	0.983723	165.679	206.731	163.294	213.064	215.895	226.704	473.876	202.27
ENSG00000063601	MTMR1	90.4117	-0.56815	0.300262	-1.89218	0.0584669	0.983723	116.294	76.1968	106.905	134.116	74.1457	75.1765	41.8126	98.648
ENSG00000100207	TCF20	5.61129	-1.38904	0.734447	-1.89127	0.0585879	0.983723	7.96532	6.24564	14.0973	4.75589	5.81535	3.5239	0	2.48692
ENSG00000125458	NT5C	33.753	0.76063	0.402196	1.89119	0.0585987	0.983723	19.1168	34.351	23.4955	21.8771	34.8921	23.4927	75.4949	37.3039
ENSG00000006015	REX1BD	221.011	0.639914	0.338383	1.8911	0.0586115	0.983723	135.41	212.976	192.663	148.384	204.264	189.116	485.49	199.783
ENSG00000226970	AL450063.1	3.97399	1.52655	0.807374	1.89075	0.0586573	0.983723	4.77919	1.87369	0	1.90236	5.08843	5.87317	8.13022	4.14487
ENSG00000170955	CAVIN3	924.143	0.618377	0.327203	1.88989	0.0587732	0.983723	578.282	910.614	748.332	677.239	966.074	722.4	1986.1	804.105
ENSG00000152380	FAM151B	14.9882	0.984477	0.520964	1.88972	0.0587952	0.983723	17.5237	6.24564	4.6991	12.3653	10.9038	28.1912	26.7136	13.2636
ENSG00000223811	AL589684.1	2.94772	1.7148	0.907517	1.88955	0.0588183	0.983723	0	1.87369	1.17478	1.90236	3.63459	5.87317	5.8073	3.3159
ENSG00000160213	CSTB	1047.89	0.619374	0.328125	1.88761	0.0590779	0.983723	670.68	984.937	863.46	784.722	1089.65	794.052	2278.78	916.846
ENSG00000011422	PLAUR	410.485	0.616429	0.326598	1.88743	0.0591028	0.983723	307.461	377.861	320.714	289.158	389.628	326.548	903.616	368.894
ENSG00000095787	WAC	255.572	-0.32821	0.173971	-1.88658	0.0592174	0.983723	318.613	260.443	277.247	284.402	247.879	232.577	184.672	238.745
ENSG00000109321	AREG	2.67154	2.00975	1.0653	1.88656	0.0592194	0.983723	1.59306	0.624564	2.34955	0	2.18075	2.34927	8.13022	4.14487
ENSG00000227345	PARG	136.952	-0.538287	0.285466	-1.88565	0.0593428	0.983723	186.388	176.127	172.692	114.141	114.126	152.702	65.0418	114.399
ENSG00000211450	SELENOH	116.161	0.643246	0.341347	1.88443	0.0595063	0.983723	78.0601	106.8	89.283	87.5084	141.749	77.5258	243.907	104.451
ENSG00000272168	CASC15	5.14229	1.30122	0.690782	1.88369	0.0596067	0.983723	4.77919	3.12282	1.17478	2.85354	5.08843	5.87317	11.6146	6.6318
ENSG00000233927	RPS28	254.121	0.634684	0.336985	1.88342	0.0596439	0.983723	189.575	227.341	189.139	189.285	248.606	189.116	570.277	229.626
ENSG00000099937	SERPIND1	24.4363	1.13638	0.603588	1.88271	0.0597398	0.983723	12.7445	14.365	28.1946	5.70707	24.7152	23.4927	75.4949	10.7767
ENSG00000101460	MAP1LC3A	96.7243	0.40967	0.217605	1.88264	0.0597498	0.983723	82.8393	85.5652	72.8361	90.362	116.307	96.3199	135.891	93.6741
ENSG00000160948	VPS28	346.354	0.545726	0.290098	1.88118	0.0599478	0.983723	207.098	339.138	278.422	299.621	393.99	288.96	646.933	316.668
ENSG00000205763	RP9P	18.7751	0.730614	0.388383	1.88117	0.0599487	0.983723	19.1168	14.9895	8.22343	14.2677	21.0806	17.6195	32.5209	22.3823
ENSG00000233170	AC138356.2	0.922046	3.24486	1.7252	1.88086	0.0599909	0.983723	0	0	0	0	0.726918	1.17463	4.64584	0.828975
ENSG00000166387	PPFIBP2	23.011	-0.720741	0.38333	-1.88021	0.0600792	0.983723	22.3029	31.8527	22.3207	37.096	17.446	28.1912	11.6146	13.2636
ENSG00000180263	FGD6	61.5633	-0.573506	0.305061	-1.87997	0.0601119	0.983723	90.8046	58.0844	46.991	99.8737	53.065	48.16	38.3282	57.1993
ENSG00000197140	ADAM32	2.42169	2.01268	1.07091	1.87941	0.0601883	0.983723	0	0.624564	2.34955	0.951178	5.81535	1.17463	3.48438	4.97385
ENSG00000147459	DOCK5	148.165	-0.562981	0.299555	-1.87939	0.0601914	0.983723	183.202	146.148	153.896	224.478	131.572	149.178	59.2345	137.61
ENSG00000165322	ARHGAP12	159.414	-0.352096	0.187538	-1.87746	0.0604548	0.983723	205.505	171.13	167.993	172.163	135.207	148.004	116.146	159.163
ENSG00000198355	PIM3	73.5095	-0.425578	0.22668	-1.87744	0.0604576	0.983723	86.0254	81.1933	90.4577	80.8502	78.5072	61.0809	51.1042	58.8572
ENSG00000185896	LAMP1	177.366	-0.318738	0.169806	-1.87708	0.0605078	0.983723	215.064	201.11	189.139	182.626	143.93	166.798	148.667	171.598
ENSG00000169564	PCBP1	69.3849	0.514054	0.273943	1.8765	0.0605873	0.983723	63.7225	62.4564	52.8649	49.4613	77.7802	56.3824	116.146	76.2657
ENSG00000139192	TAPBPL	79.4394	0.467417	0.249223	1.8755	0.0607239	0.983723	57.3503	64.9546	81.0595	62.7778	81.4148	72.8273	123.115	92.0162
ENSG00000179240	GVQW3	3.45067	1.62255	0.86536	1.875	0.0607926	0.983723	3.18613	1.87369	0	1.90236	7.9961	3.5239	5.8073	3.3159
ENSG00000075073	TACR2	2.02781	-2.24636	1.19885	-1.87377	0.0609626	0.983723	4.77919	4.37195	2.34955	1.90236	0	0	1.16146	1.65795
ENSG00000164125	FAM198B	253.515	-0.582138	0.310807	-1.87299	0.0610698	0.983723	331.357	257.32	278.422	350.034	218.802	240.8	89.4324	261.956
ENSG00000236090	LDHAP3	14.6054	0.81874	0.437154	1.87289	0.0610841	0.983723	6.37225	10.6176	8.22343	16.17	18.8999	14.0956	26.7136	15.7505
ENSG00000246705	H2AFJ	170.099	0.659344	0.352067	1.87278	0.0610986	0.983723	109.921	158.639	129.225	128.409	175.187	117.463	384.443	157.505
ENSG00000196569	LAMA2	9.99382	-1.22951	0.657428	-1.87018	0.0614586	0.983723	12.7445	6.8702	16.4469	19.9747	4.36151	12.921	0	6.6318
ENSG00000115350	POLE4	166.475	0.675941	0.361478	1.86994	0.0614925	0.983723	114.701	139.278	124.526	133.165	170.826	117.463	392.574	139.268
ENSG00000280219	AC093908.1	2.44537	-2.1924	1.17293	-1.86917	0.0615992	0.983723	3.18613	4.37195	0	8.56061	1.45384	0	1.16146	0.828975
ENSG00000167191	GPRC5B	28.132	-0.639776	0.342516	-1.86787	0.0617803	0.983723	28.6751	45.5932	27.0198	35.1936	26.896	27.0166	13.9375	20.7244
ENSG00000213654	GPSM3	2.98884	-2.07144	1.10916	-1.86757	0.0618221	0.983723	1.59306	2.49825	10.573	4.75589	0	1.17463	0	3.3159
ENSG00000138802	SEC24B	246.642	-0.537315	0.287731	-1.86742	0.0618432	0.983723	267.635	279.18	285.471	336.717	220.256	224.355	97.5627	261.956
ENSG00000246695	RASSF8-AS1	26.2498	0.741089	0.396861	1.86738	0.0618489	0.983723	12.7445	19.3615	17.6216	27.5842	31.2575	35.239	48.7813	17.4085
ENSG00000253485	PCDHGA5	4.36627	1.607	0.860599	1.8673	0.0618594	0.983723	3.18613	2.49825	2.34955	0.951178	7.9961	3.5239	1.16146	13.2636
ENSG00000101882	NKAP	33.0336	0.597978	0.320267	1.86713	0.061884	0.983723	19.1168	30.6036	28.1946	25.6818	34.8921	32.8897	58.073	34.8169
ENSG00000130255	RPL36	569.846	0.609725	0.326609	1.86683	0.0619247	0.983723	375.963	530.255	460.512	436.591	628.784	420.519	1219.53	486.608
ENSG00000227124	ZNF717	20.6072	0.774021	0.414662	1.86663	0.0619534	0.983723	17.5237	14.9895	17.6216	10.463	15.9922	30.5405	39.4896	18.2374
ENSG00000127191	TRAF2	71.4094	0.479304	0.25678	1.86659	0.0619585	0.983723	60.5364	76.1968	39.9424	60.8754	98.134	77.5258	80.1408	77.9236
ENSG00000099624	ATP5F1D	342.525	0.603644	0.323405	1.86653	0.0619673	0.983723	200.726	335.391	284.296	265.379	362.732	243.149	700.36	348.169
ENSG00000102934	PLLP	4.41963	1.51317	0.811272	1.86518	0.062156	0.983723	0	4.99651	1.17478	1.90236	5.08843	11.7463	4.64584	5.80282
ENSG00000185261	KIAA0825	11.2621	-0.899696	0.482406	-1.86502	0.0621788	0.983723	22.3029	11.2421	12.9225	12.3653	5.08843	11.7463	6.96876	7.46077
ENSG00000152348	ATG10	47.1265	0.585789	0.314182	1.86449	0.0622527	0.983723	31.8613	41.2212	42.2919	34.2424	47.2497	43.4614	89.4324	47.2516
ENSG00000154620	TMSB4Y	4.31354	1.37538	0.737975	1.86372	0.0623607	0.983723	1.59306	2.49825	2.34955	2.85354	5.08843	4.69853	10.4531	4.97385
ENSG00000127081	ZNF484	27.5729	-0.786527	0.42207	-1.8635	0.0623924	0.983723	47.7919	46.8423	32.8937	12.3653	18.8999	22.318	16.2604	23.2113
ENSG00000128039	SRD5A3	144.859	0.381359	0.20475	1.86256	0.062524	0.983723	116.294	126.786	142.148	116.995	160.649	162.099	202.094	131.807
ENSG00000169087	HSPBAP1	33.8457	0.683594	0.367286	1.8612	0.0627153	0.983723	35.0474	23.7334	18.7964	26.633	30.5306	29.3658	68.5261	38.1328
ENSG00000171735	CAMTA1	121.928	0.593073	0.318717	1.86082	0.0627702	0.983723	90.8046	103.053	104.555	89.4108	120.668	112.765	255.521	98.648
ENSG00000119684	MLH3	34.4907	-0.635132	0.341376	-1.8605	0.0628142	0.983723	25.489	34.351	54.0397	53.266	29.8036	30.5405	30.198	18.2374
ENSG00000145050	MANF	195.655	0.667265	0.358673	1.86037	0.0628334	0.983723	135.41	168.632	160.944	138.872	212.987	136.257	452.969	159.163
ENSG00000078687	TNRC6C	17.8371	-0.828695	0.445475	-1.86025	0.0628503	0.983723	19.1168	15.6141	32.8937	24.7306	20.3537	11.7463	5.8073	12.4346
ENSG00000170906	NDUFA3	195.62	0.653314	0.351334	1.85953	0.0629526	0.983723	135.41	178.625	144.497	148.384	176.641	151.528	454.131	175.743
ENSG00000102218	RP2	132.377	-0.491933	0.264598	-1.85917	0.063003	0.983723	152.934	151.144	159.77	155.993	121.395	130.384	58.073	129.32
ENSG00000060971	ACAA1	279.337	0.371258	0.200033	1.85599	0.0634554	0.983723	227.808	283.552	238.479	222.576	288.587	263.118	403.027	307.55
ENSG00000185163	DDX51	34.4086	0.609868	0.328923	1.85413	0.06372	0.983723	12.7445	34.351	30.5442	29.4865	44.342	49.3346	31.3594	43.1067
ENSG00000113532	ST8SIA4	2.87862	-2.07357	1.11861	-1.8537	0.0637815	0.983723	1.59306	6.24564	1.17478	9.51178	2.18075	0	2.32292	0
ENSG00000270021	AC026691.1	1.33288	2.94754	1.59055	1.85316	0.0638594	0.983723	0	0	0	0.951178	2.18075	5.87317	0	1.65795
ENSG00000105429	MEGF8	18.3453	-0.710271	0.383448	-1.85232	0.0639792	0.983723	23.896	21.2352	25.8451	20.9259	13.0845	12.921	8.13022	20.7244
ENSG00000204103	MAFB	2.609	1.99143	1.07548	1.85167	0.0640735	0.983723	0	2.49825	1.17478	0	4.36151	5.87317	1.16146	5.80282
ENSG00000181555	SETD2	99.3532	-0.618895	0.334301	-1.85131	0.0641249	0.983723	132.224	88.0635	116.303	145.53	63.2419	103.368	38.3282	107.767
ENSG00000067829	IDH3G	386.311	0.528412	0.285481	1.85096	0.0641758	0.983723	307.461	344.135	325.413	287.256	393.263	352.39	757.272	323.3
ENSG00000198862	LTN1	152.188	-0.637463	0.344442	-1.85071	0.0642109	0.983723	200.726	153.018	142.148	245.404	113.399	180.894	53.4272	128.491
ENSG00000151491	EPS8	593.913	-0.319789	0.172966	-1.84886	0.0644783	0.983723	699.355	618.318	594.437	727.652	600.434	545.03	423.933	542.149
ENSG00000172893	DHCR7	2588.8	0.262221	0.141915	1.84774	0.0646402	0.983723	2093.29	2463.28	2491.7	2367.48	3101.76	2855.53	2489.01	2848.36
ENSG00000167863	ATP5PD	303.93	0.555198	0.300504	1.84756	0.0646663	0.983723	219.843	263.566	258.451	241.599	331.475	254.895	612.089	249.521
ENSG00000250697	AC010343.3	59.1819	0.514998	0.278962	1.84612	0.0648749	0.983723	36.6405	54.337	58.7388	43.7542	64.6957	56.3824	97.5627	61.3441
ENSG00000164081	TEX264	266.372	0.499659	0.270871	1.84464	0.0650903	0.983723	192.761	258.569	244.353	185.48	271.14	244.324	483.167	251.179
ENSG00000180917	CMTR2	94.9835	-0.545408	0.295693	-1.84451	0.0651093	0.983723	122.666	114.295	99.8559	115.093	93.7724	92.796	36.0053	85.3844
ENSG00000271966	AC021321.1	1.23458	2.79052	1.51302	1.84433	0.0651349	0.983723	0	0	1.17478	0	0.726918	1.17463	3.48438	3.3159
ENSG00000174744	BRMS1	214.61	0.528252	0.287186	1.83941	0.065855	0.983723	119.48	186.12	209.11	186.431	233.341	197.338	390.251	194.809
ENSG00000141873	SLC39A3	143.11	0.358408	0.19492	1.83875	0.0659525	0.983723	105.142	136.155	135.099	123.653	167.191	138.607	188.157	150.873
ENSG00000187630	DHRS4L2	24.9019	0.712983	0.387872	1.83819	0.0660342	0.983723	17.5237	16.8632	18.7964	21.8771	24.7152	21.1434	53.4272	24.8692
ENSG00000121210	TMEM131L	66.2014	-0.531383	0.28909	-1.83812	0.0660443	0.983723	87.6185	89.9372	74.0109	62.7778	65.4226	50.5092	31.3594	67.9759
ENSG00000167962	ZNF598	25.3783	-0.926161	0.504055	-1.83742	0.0661478	0.983723	39.8266	19.986	43.4667	30.4377	18.8999	28.1912	2.32292	19.8954
ENSG00000126950	TMEM35A	71.1946	0.510175	0.277886	1.83591	0.0663705	0.983723	63.7225	51.8388	45.8163	73.2407	74.1457	75.1765	118.469	67.1469
ENSG00000139687	RB1	291.651	-0.607507	0.331445	-1.83291	0.0668167	0.983723	450.837	237.334	361.831	360.497	266.052	279.563	101.047	276.049
ENSG00000222009	BTBD19	33.7194	-0.614433	0.335472	-1.83155	0.0670188	0.983723	54.1642	37.4738	35.2433	37.096	26.896	37.5883	13.9375	27.3562
ENSG00000177042	TMEM80	77.0905	0.463427	0.253034	1.83148	0.0670287	0.983723	65.3156	68.702	74.0109	51.3636	94.4994	65.7795	114.985	82.0685
ENSG00000116095	PLEKHA3	128.481	-0.324039	0.176951	-1.83124	0.0670654	0.983723	146.562	140.527	132.75	152.189	113.399	108.066	109.177	125.175
ENSG00000198429	ZNF69	26.7526	-0.642653	0.351002	-1.83091	0.0671141	0.983723	28.6751	29.3545	30.5442	42.803	26.896	16.4449	12.7761	26.5272
ENSG00000267774	AC010776.2	3.11805	1.7743	0.969989	1.82919	0.0673706	0.983723	0	1.87369	2.34955	0.951178	2.90767	9.39707	5.8073	1.65795
ENSG00000138778	CENPE	10.161	-0.989751	0.541097	-1.82916	0.0673759	0.983723	14.3376	11.2421	16.4469	11.4141	4.36151	8.22243	12.7761	2.48692
ENSG00000188186	LAMTOR4	502.548	0.597719	0.326833	1.82882	0.0674265	0.983723	326.578	490.283	365.355	415.665	535.739	375.883	1067.38	443.501
ENSG00000231574	LINC02015	3.58401	1.63789	0.895816	1.82838	0.0674922	0.983723	3.18613	1.24913	0	2.85354	6.54226	7.0478	1.16146	6.6318
ENSG00000118689	FOXO3	121.603	-0.471689	0.258141	-1.82725	0.0676615	0.983723	140.19	130.534	164.469	131.263	111.945	118.638	58.073	117.714
ENSG00000196337	CGB7	1.2616	2.91769	1.59788	1.82597	0.0678542	0.983723	0	0.624564	0	0	3.63459	2.34927	3.48438	0
ENSG00000077942	FBLN1	28.4356	0.830282	0.454771	1.82571	0.0678933	0.983723	23.896	19.3615	16.4469	22.8283	33.4382	35.239	11.6146	64.66
ENSG00000110799	VWF	1.35372	-3.04741	1.67046	-1.8243	0.0681072	0.983723	4.77919	0.624564	4.6991	0	0.726918	0	0	0
ENSG00000198780	FAM169A	2.3678	1.97594	1.08321	1.82414	0.0681307	0.983723	1.59306	1.24913	1.17478	0	3.63459	1.17463	3.48438	6.6318
ENSG00000235884	LINC00941	67.0605	0.542111	0.297318	1.82333	0.0682528	0.983723	43.0127	66.2038	46.991	59.9242	74.8726	84.5736	110.339	50.5675
ENSG00000180667	YOD1	20.1395	-0.852976	0.467925	-1.82289	0.0683204	0.983723	31.8613	18.7369	17.6216	36.1448	16.7191	19.9688	3.48438	16.5795
ENSG00000130038	CRACR2A	1.1996	2.75279	1.51021	1.82279	0.0683348	0.983723	0	0	1.17478	0	2.90767	3.5239	1.16146	0.828975
ENSG00000167779	IGFBP6	426.714	0.626029	0.343454	1.82275	0.068342	0.983723	321.799	410.963	323.063	285.354	455.778	292.484	945.429	378.841
ENSG00000236098	AC097059.2	1.29048	2.91215	1.59777	1.82264	0.0683583	0.983723	0	0.624564	0	0	0.726918	1.17463	6.96876	0.828975
ENSG00000107863	ARHGAP21	64.2984	-0.520315	0.285537	-1.82223	0.0684195	0.983723	84.4324	67.4529	76.3604	75.1431	43.6151	75.1765	32.5209	59.6862
ENSG00000061918	GUCY1B1	11.1729	1.09425	0.600919	1.82096	0.0686123	0.983723	6.37225	5.62107	10.573	5.70707	6.54226	28.1912	19.7448	6.6318
ENSG00000183011	NAA38	251.122	0.650953	0.357594	1.82037	0.0687027	0.983723	156.12	241.706	178.566	203.552	226.798	184.417	580.73	237.087
ENSG00000185567	AHNAK2	126.328	-0.339012	0.186303	-1.81968	0.0688072	0.983723	143.376	148.646	133.924	137.921	114.853	130.384	98.7241	102.793
ENSG00000120696	KBTBD7	53.4923	-0.499072	0.274277	-1.81959	0.0688215	0.983723	63.7225	65.5792	63.4379	58.9731	44.342	31.7151	37.1667	63.0021
ENSG00000232004	CAP1P2	3.72788	1.50205	0.825528	1.81951	0.0688343	0.983723	3.18613	2.49825	1.17478	0.951178	5.81535	9.39707	3.48438	3.3159
ENSG00000137642	SORL1	3.71881	-1.89042	1.039	-1.81945	0.0688424	0.983723	11.1514	5.62107	3.52433	2.85354	0.726918	5.87317	0	0
ENSG00000168556	ING2	31.6475	-0.545604	0.299883	-1.81939	0.0688517	0.983723	49.385	39.3475	31.7189	30.4377	26.896	22.318	29.0365	24.0403
ENSG00000184988	TMEM106A	40.2182	-0.474899	0.26107	-1.81905	0.0689036	0.983723	57.3503	41.2212	45.8163	43.7542	32.7113	32.8897	34.8438	33.159
ENSG00000204344	STK19	39.6252	0.562479	0.30939	1.81803	0.0690599	0.983723	31.8613	43.0949	22.3207	29.4865	46.5228	35.239	60.3959	48.0805
ENSG00000282021	AC100810.3	1.84669	2.17909	1.19871	1.81786	0.069086	0.983723	0	1.24913	1.17478	0	4.36151	2.34927	2.32292	3.3159
ENSG00000182632	CCNYL2	1.12231	-2.87523	1.58194	-1.81753	0.0691355	0.983723	0	1.87369	3.52433	2.85354	0.726918	0	0	0
ENSG00000272823	AL445423.1	0.784607	3.07228	1.6905	1.81737	0.0691598	0.983723	0	0	0	0	1.45384	1.17463	1.16146	2.48692
ENSG00000138829	FBN2	123.174	-0.620386	0.341542	-1.81643	0.0693052	0.983723	181.609	104.927	136.274	175.017	83.5956	140.956	45.2969	117.714
ENSG00000080371	RAB21	153.995	-0.356324	0.196174	-1.81637	0.0693143	0.983723	183.202	173.629	146.847	187.382	117.761	160.925	119.63	142.584
ENSG00000249249	AC010226.1	1.37648	-3.00772	1.65623	-1.81601	0.0693691	0.983723	6.37225	0.624564	0	2.85354	0	0	1.16146	0
ENSG00000173992	CCS	116.073	0.550423	0.303127	1.81582	0.0693986	0.983723	84.4324	108.05	102.205	80.8502	128.665	105.717	224.162	94.5031
ENSG00000075407	ZNF37A	67.9867	-0.567009	0.312352	-1.81529	0.0694791	0.983723	79.6532	74.3231	97.5064	73.2407	55.9727	85.7482	30.198	47.2516
ENSG00000137473	TTC29	3.24355	-1.57735	0.869762	-1.81354	0.0697488	0.983723	4.77919	4.99651	5.87388	3.80471	2.18075	0	3.48438	0.828975
ENSG00000111665	CDCA3	6.71842	-1.06841	0.589461	-1.81251	0.069907	0.983723	7.96532	9.99302	12.9225	5.70707	4.36151	2.34927	4.64584	5.80282
ENSG00000227028	SLC8A1-AS1	2.57003	1.91257	1.05526	1.81242	0.0699212	0.983723	3.18613	0.624564	0	0.951178	3.63459	4.69853	5.8073	1.65795
ENSG00000184307	ZDHHC23	5.86254	-1.22878	0.678039	-1.81226	0.0699466	0.983723	9.55838	6.8702	10.573	6.65825	5.08843	2.34927	0	5.80282
ENSG00000129128	SPCS3	339.562	-0.334509	0.184762	-1.81049	0.0702204	0.983723	457.209	324.149	363.006	372.862	293.675	345.342	254.36	305.892
ENSG00000177663	IL17RA	97.5239	-0.486952	0.268979	-1.81037	0.0702382	0.983723	90.8046	108.05	124.526	132.214	85.0494	91.6214	47.6199	100.306
ENSG00000256294	ZNF225	44.5674	-0.73038	0.403467	-1.81026	0.0702554	0.983723	71.6879	41.8458	84.5839	25.6818	30.5306	32.8897	22.0677	47.2516
ENSG00000245067	IGFBP7-AS1	3.16765	1.80979	1.00016	1.80949	0.0703746	0.983723	0	1.87369	3.52433	0	5.81535	2.34927	9.29168	2.48692
ENSG00000255153	TOLLIP-AS1	1.90138	-2.12034	1.17197	-1.8092	0.0704193	0.983723	4.77919	2.49825	2.34955	2.85354	0.726918	1.17463	0	0.828975
ENSG00000134996	OSTF1	207.475	0.498562	0.275673	1.80853	0.0705247	0.983723	164.086	196.113	155.07	171.212	231.16	187.941	380.959	173.256
ENSG00000198482	ZNF808	11.6173	-0.875815	0.485021	-1.80573	0.0709611	0.983723	14.3376	12.4913	9.39821	23.7795	5.81535	7.0478	9.29168	10.7767
ENSG00000243742	RPLP0P2	102.528	0.395375	0.218963	1.80567	0.0709691	0.983723	87.6185	104.927	70.4866	89.4108	118.488	112.765	137.052	99.477
ENSG00000189129	PLAC9	40.9277	0.775421	0.429558	1.80516	0.0710494	0.983723	20.7098	35.6001	22.3207	40.9007	55.9727	25.8419	92.9168	33.159
ENSG00000130313	PGLS	195.979	0.569533	0.315529	1.80501	0.0710737	0.983723	125.852	204.232	157.42	141.726	228.252	176.195	383.282	150.873
ENSG00000085465	OVGP1	1.89806	2.50014	1.38544	1.80458	0.0711397	0.983723	1.59306	0	1.17478	0	1.45384	1.17463	8.13022	1.65795
ENSG00000197183	NOL4L	40.5272	-0.485307	0.268964	-1.80436	0.0711756	0.983723	43.0127	51.8388	45.8163	48.5101	35.619	35.239	24.3907	39.7908
ENSG00000011478	QPCTL	74.664	0.416522	0.231121	1.80218	0.071517	0.983723	46.1988	71.8248	76.3604	59.9242	88.684	76.3512	91.7554	86.2134
ENSG00000174332	GLIS1	5.8875	-1.29716	0.719863	-1.80196	0.0715514	0.983723	1.59306	10.6176	7.04866	14.2677	5.08843	2.34927	1.16146	4.97385
ENSG00000166333	ILK	3.39894	-1.43523	0.796791	-1.80126	0.0716613	0.983723	4.77919	5.62107	4.6991	4.75589	2.18075	1.17463	2.32292	1.65795
ENSG00000157778	PSMG3	55.0039	0.611553	0.339708	1.80023	0.0718244	0.983723	31.8613	49.9651	46.991	43.7542	53.7919	44.6361	112.662	56.3703
ENSG00000182585	EPGN	47.3367	0.552807	0.307197	1.79952	0.0719366	0.983723	44.6058	44.344	30.5442	33.2912	51.6112	54.0331	81.3022	38.9618
ENSG00000111678	C12orf57	35.8197	0.671524	0.373197	1.79938	0.0719584	0.983723	22.3029	37.4738	24.6703	24.7306	39.2536	24.6673	72.0105	41.4487
ENSG00000247828	TMEM161B-AS1	25.3805	0.802645	0.446368	1.79817	0.0721504	0.983723	12.7445	25.6071	19.9712	14.2677	27.6229	27.0166	59.2345	16.5795
ENSG00000167555	ZNF528	113.113	-0.385644	0.214526	-1.79766	0.0722312	0.983723	144.969	139.902	130.4	97.9714	96.6801	108.066	82.4637	104.451
ENSG00000205593	DENND6B	9.56101	1.151	0.640295	1.79762	0.072238	0.983723	4.77919	9.36846	7.04866	1.90236	10.1769	7.0478	27.875	8.28975
ENSG00000148803	FUOM	27.6598	0.876383	0.487622	1.79726	0.0722943	0.983723	6.37225	31.2282	23.4955	15.2189	27.6229	19.9688	65.0418	32.33
ENSG00000107223	EDF1	653.316	0.600661	0.334259	1.79699	0.0723366	0.983723	454.023	620.816	520.426	480.345	681.849	479.25	1434.4	555.413
ENSG00000267279	AC090409.1	22.0683	0.945705	0.526605	1.79585	0.0725179	0.983723	11.1514	19.3615	11.7478	17.1212	29.0767	14.0956	61.5574	12.4346
ENSG00000198695	MT-ND6	704.339	0.417662	0.232571	1.79585	0.0725186	0.983723	640.412	648.297	601.485	521.246	644.776	703.605	1177.72	697.168
ENSG00000176340	COX8A	202.628	0.660943	0.368079	1.79565	0.0725498	0.983723	117.887	188.618	177.391	142.677	189.726	145.655	475.037	184.032
ENSG00000173653	RCE1	60.8482	0.572458	0.31891	1.79505	0.0726465	0.983723	41.4197	69.9511	42.2919	39.9495	63.2419	59.9063	110.339	59.6862
ENSG00000164323	CFAP97	256.203	-0.377284	0.210258	-1.79438	0.0727519	0.983723	350.474	247.952	261.975	299.621	204.264	246.673	174.219	264.443
ENSG00000145476	CYP4V2	99.5732	-0.488095	0.272022	-1.79432	0.0727622	0.983723	160.899	81.1933	121.002	104.63	88.684	88.0975	59.2345	92.8452
ENSG00000225973	PIGBOS1	16.8022	0.704855	0.39297	1.79366	0.0728667	0.983723	14.3376	16.2387	10.573	9.51178	23.2614	24.6673	20.9063	14.9215
ENSG00000107281	NPDC1	188.613	0.39223	0.218775	1.79285	0.0729973	0.983723	125.852	188.618	157.42	177.87	212.987	180.894	272.943	192.322
ENSG00000106346	USP42	33.3285	-0.707314	0.394679	-1.79213	0.0731127	0.983723	54.1642	28.1054	37.5928	46.6077	23.9883	32.8897	9.29168	33.988
ENSG00000213281	NRAS	289.931	-0.383161	0.213905	-1.79127	0.0732506	0.983723	379.149	231.713	332.462	371.911	252.968	265.467	211.386	274.391
ENSG00000100300	TSPO	3066.67	0.512057	0.285875	1.79119	0.0732625	0.983723	2219.14	2885.48	2624.45	2381.75	3118.48	2482	5991.97	2830.12
ENSG00000167964	RAB26	12.4354	-0.953235	0.532191	-1.79115	0.0732689	0.983723	14.3376	22.4843	18.7964	9.51178	9.44994	16.4449	3.48438	4.97385
ENSG00000150401	DCUN1D2	32.9919	-0.599435	0.334703	-1.79095	0.0733018	0.983723	31.8613	40.5966	31.7189	55.1684	36.3459	21.1434	19.7448	27.3562
ENSG00000158711	ELK4	28.0693	-0.70059	0.391293	-1.79045	0.0733818	0.983723	50.978	37.4738	14.0973	37.096	21.8075	21.1434	16.2604	25.6982
ENSG00000156172	C8orf37	12.8942	0.89971	0.502507	1.79044	0.0733825	0.983723	12.7445	10.6176	5.87388	6.65825	14.5384	11.7463	30.198	10.7767
ENSG00000165449	SLC16A9	15.0412	-0.93132	0.520313	-1.78993	0.073466	0.983723	15.9306	28.1054	8.22343	26.633	11.6307	10.5717	3.48438	15.7505
ENSG00000183978	COA3	266.296	0.607715	0.339531	1.78987	0.0734751	0.983723	164.086	277.931	198.537	201.65	282.771	199.688	570.277	235.429
ENSG00000131089	ARHGEF9	86.5686	0.417732	0.233501	1.78899	0.0736159	0.983723	70.0948	89.9372	72.8361	62.7778	110.492	112.765	76.6564	96.99
ENSG00000059691	GATB	111.291	0.428665	0.239778	1.78776	0.0738154	0.983723	109.921	97.4319	102.205	70.3872	126.484	120.987	162.604	100.306
ENSG00000137965	IFI44	23.3991	-0.908117	0.508094	-1.7873	0.073889	0.983723	11.1514	56.2107	36.4181	17.1212	13.0845	25.8419	11.6146	15.7505
ENSG00000083845	RPS5	939.251	0.532784	0.298154	1.78694	0.0739465	0.983723	683.424	876.887	733.06	776.162	948.628	741.194	1896.66	857.989
ENSG00000004779	NDUFAB1	363.815	0.522756	0.292915	1.78467	0.0743145	0.983723	261.262	346.633	294.869	290.109	377.271	293.658	714.298	332.419
ENSG00000176749	CDK5R1	10.356	-0.869673	0.487384	-1.78437	0.0743636	0.983723	14.3376	11.2421	15.2721	13.3165	6.54226	7.0478	3.48438	11.6056
ENSG00000157540	DYRK1A	5.84906	-1.43412	0.804115	-1.78348	0.074509	0.983723	11.1514	4.99651	7.04866	11.4141	0.726918	1.17463	1.16146	9.11872
ENSG00000112306	RPS12	421.334	0.535482	0.300365	1.78277	0.0746237	0.983723	253.297	412.837	360.656	347.18	419.432	353.565	825.798	397.908
ENSG00000165209	STRBP	52.7376	-0.489149	0.274394	-1.78265	0.0746431	0.983723	54.1642	58.0844	74.0109	59.9242	50.1574	57.557	34.8438	33.159
ENSG00000161692	DBF4B	2.27898	-2.64007	1.48121	-1.78238	0.074688	0.983723	4.77919	1.87369	9.39821	0	2.18075	0	0	0
ENSG00000259705	AC084757.3	14.4359	-0.737215	0.413616	-1.78237	0.0746896	0.983723	17.5237	18.1123	18.7964	17.1212	7.9961	9.39707	17.4219	9.11872
ENSG00000254560	BBOX1-AS1	1.70139	2.5639	1.43881	1.78197	0.0747549	0.983723	0	0.624564	0	0.951178	0.726918	2.34927	8.13022	0.828975
ENSG00000171634	BPTF	43.3198	-0.454001	0.254945	-1.78078	0.0749482	0.983723	49.385	49.3405	52.8649	48.5101	37.7997	44.6361	32.5209	31.501
ENSG00000142507	PSMB6	977.963	0.535897	0.301058	1.78005	0.0750686	0.983723	769.45	869.393	765.954	787.576	933.363	803.449	2023.26	871.252
ENSG00000177830	CHID1	744.298	0.257229	0.144554	1.77946	0.0751637	0.983723	632.446	718.873	731.885	627.778	816.329	758.813	898.97	769.288
ENSG00000077348	EXOSC5	64.1843	0.547842	0.308007	1.77867	0.0752944	0.983723	50.978	63.0809	50.5154	42.803	53.7919	58.7317	117.307	76.2657
ENSG00000115556	PLCD4	10.1195	0.933772	0.524984	1.77867	0.0752946	0.983723	1.59306	4.99651	10.573	10.463	14.5384	12.921	9.29168	16.5795
ENSG00000196295	AC005154.1	25.4774	0.639892	0.359941	1.77777	0.0754415	0.983723	20.7098	24.9825	18.7964	14.2677	24.7152	28.1912	46.4584	25.6982
ENSG00000112305	SMAP1	48.1096	0.70456	0.396353	1.7776	0.0754689	0.983723	25.489	49.9651	44.6415	24.7306	50.8843	48.16	104.531	36.4749
ENSG00000164037	SLC9B1	1.44719	3.09842	1.74303	1.7776	0.075469	0.983723	0	0.624564	0	0	0.726918	9.39707	0	0.828975
ENSG00000141552	ANAPC11	485.523	0.593874	0.334095	1.77756	0.075476	0.983723	302.682	494.03	378.278	370.96	471.77	398.201	1054.61	413.658
ENSG00000130653	PNPLA7	4.85894	1.29825	0.730449	1.77733	0.0755145	0.983723	1.59306	3.12282	4.6991	1.90236	9.44994	2.34927	5.8073	9.9477
ENSG00000130988	RGN	4.87344	1.37697	0.774754	1.77729	0.07552	0.983723	1.59306	1.87369	5.87388	1.90236	11.6307	2.34927	4.64584	9.11872
ENSG00000103363	ELOB	676.042	0.627246	0.352934	1.77723	0.0755298	0.983723	430.127	639.553	572.116	482.247	692.753	454.583	1534.29	602.665
ENSG00000186222	BLOC1S4	120.664	0.540256	0.30401	1.7771	0.0755515	0.983723	103.549	91.1863	104.555	94.1667	143.203	88.0975	231.131	109.425
ENSG00000139168	ZCRB1	226.975	0.552537	0.31118	1.77562	0.0757952	0.983723	173.644	179.874	176.216	205.455	231.887	192.64	470.391	185.69
ENSG00000273015	AC008124.1	23.9942	-0.652169	0.367466	-1.77477	0.0759355	0.983723	23.896	24.9825	27.0198	41.8519	26.896	17.6195	13.9375	15.7505
ENSG00000186300	ZNF555	37.2211	-0.59291	0.334106	-1.77462	0.0759608	0.983723	46.1988	41.8458	50.5154	41.8519	42.8882	14.0956	31.3594	29.0141
ENSG00000134597	RBMX2	28.3475	0.771917	0.43508	1.7742	0.0760305	0.983723	14.3376	31.8527	12.9225	22.8283	27.6229	23.4927	63.8803	29.8431
ENSG00000245910	SNHG6	28.2778	0.769489	0.433833	1.7737	0.076113	0.983723	9.55838	26.2317	17.6216	28.5354	32.7113	22.318	62.7188	26.5272
ENSG00000169155	ZBTB43	73.725	-0.501815	0.283021	-1.77307	0.0762172	0.983723	79.6532	82.4424	85.7586	98.9226	61.0611	45.8107	44.1355	92.0162
ENSG00000267270	PARD6G-AS1	1.69221	2.42808	1.37103	1.77099	0.0765631	0.983723	0	0	2.34955	0	4.36151	2.34927	1.16146	3.3159
ENSG00000167384	ZNF180	23.6424	0.706933	0.399276	1.77054	0.0766377	0.983723	23.896	23.1089	15.2721	9.51178	18.173	28.1912	33.6823	37.3039
ENSG00000174013	FBXO45	52.549	-0.465015	0.26276	-1.76973	0.0767718	0.983723	58.9434	52.4634	71.6613	61.8266	43.6151	45.8107	31.3594	54.7123
ENSG00000138593	SECISBP2L	53.7298	0.538309	0.304186	1.76967	0.0767824	0.983723	38.2335	59.3336	45.8163	30.4377	55.2458	49.3346	85.9481	65.489
ENSG00000248333	CDK11B	19.2422	0.704038	0.39794	1.76921	0.0768591	0.983723	15.9306	18.7369	11.7478	11.4141	21.0806	18.7941	37.1667	19.0664
ENSG00000238045	AC009133.1	9.8035	-0.851541	0.481481	-1.76859	0.0769629	0.983723	12.7445	12.4913	12.9225	12.3653	5.08843	8.22243	4.64584	9.9477
ENSG00000010626	LRRC23	28.3876	0.777056	0.440164	1.76538	0.0775001	0.983723	19.1168	27.4808	19.9712	16.17	37.7997	34.0644	59.2345	13.2636
ENSG00000198836	OPA1	373.187	-0.393144	0.222739	-1.76504	0.0775568	0.983723	492.257	415.335	398.249	390.934	344.559	357.089	209.063	378.012
ENSG00000224470	ATXN1L	28.3036	-0.775586	0.439618	-1.76423	0.0776936	0.983723	47.7919	14.365	54.0397	27.5842	21.8075	25.8419	20.9063	14.0926
ENSG00000173947	PIFO	8.68235	-0.956606	0.542397	-1.76366	0.0777886	0.983723	14.3376	6.8702	15.2721	9.51178	3.63459	8.22243	5.8073	5.80282
ENSG00000173113	TRMT112	421.193	0.601373	0.341091	1.76308	0.0778863	0.983723	280.379	407.84	330.112	318.645	392.536	339.469	946.59	353.972
ENSG00000140526	ABHD2	128.334	-0.510243	0.289799	-1.76068	0.0782931	0.983723	200.726	133.032	145.672	125.556	111.218	129.21	56.9115	124.346
ENSG00000120539	MASTL	31.696	0.696294	0.39551	1.7605	0.0783236	0.983723	17.5237	26.8562	19.9712	31.3889	27.6229	58.7317	20.9063	50.5675
ENSG00000087076	HSD17B14	56.3504	0.522787	0.297167	1.75924	0.0785374	0.983723	44.6058	54.9616	43.4667	40.9007	65.4226	49.3346	99.8856	52.2254
ENSG00000010278	CD9	1982.74	0.543517	0.30898	1.75907	0.0785657	0.983723	1522.97	1846.21	1600.04	1483.84	1897.26	1747.85	4163.83	1599.92
ENSG00000229931	AL137003.1	1.88656	2.45151	1.3938	1.75888	0.0785985	0.983723	3.18613	0	0	0	2.90767	3.5239	4.64584	0.828975
ENSG00000183696	UPP1	157.957	0.560301	0.318819	1.75743	0.0788445	0.983723	113.108	144.274	124.526	127.458	173.733	126.86	325.209	128.491
ENSG00000126106	TMEM53	79.4418	0.564579	0.32128	1.75728	0.0788704	0.983723	47.7919	85.5652	54.0397	66.5825	81.4148	77.5258	152.151	70.4628
ENSG00000138175	ARL3	226.027	0.53195	0.302735	1.75715	0.0788924	0.983723	164.086	181.123	185.615	207.357	232.614	191.465	455.292	190.664
ENSG00000067365	METTL22	160.923	0.405549	0.230848	1.75678	0.0789555	0.983723	127.445	145.523	131.575	148.384	196.995	132.734	243.907	160.821
ENSG00000131115	ZNF227	34.2999	0.583597	0.332213	1.75669	0.0789701	0.983723	19.1168	34.9756	27.0198	26.633	38.5267	49.3346	52.2657	26.5272
ENSG00000188095	MESP2	1.10538	2.67843	1.52476	1.75662	0.0789821	0.983723	0	0.624564	0	0	0.726918	2.34927	3.48438	1.65795
ENSG00000162910	MRPL55	244.885	0.549975	0.313145	1.75629	0.0790385	0.983723	167.272	241.082	213.809	171.212	220.256	210.259	500.589	234.6
ENSG00000128606	LRRC17	885.112	0.401117	0.228401	1.7562	0.0790545	0.983723	661.121	809.435	788.275	790.429	849.04	873.927	1468.09	840.58
ENSG00000166167	BTRC	147.202	-0.433969	0.247223	-1.75538	0.0791951	0.983723	183.202	138.653	187.964	169.31	151.926	123.337	78.9793	144.242
ENSG00000177556	ATOX1	434.749	0.592031	0.337495	1.75419	0.0793978	0.983723	305.868	378.486	347.734	353.838	423.793	314.802	972.142	381.328
ENSG00000137818	RPLP1	1270.72	0.508662	0.290011	1.75394	0.0794408	0.983723	906.453	1157.94	1086.67	1043.44	1275.01	1025.45	2511.08	1159.74
ENSG00000246263	UBR5-AS1	4.28544	1.39405	0.794842	1.75387	0.0794529	0.983723	4.77919	1.87369	1.17478	1.90236	2.90767	7.0478	10.4531	4.14487
ENSG00000141252	VPS53	86.2872	-0.445792	0.254184	-1.75382	0.0794616	0.983723	121.073	91.1863	95.1568	92.2643	91.5917	85.7482	51.1042	62.1731
ENSG00000218510	LINC00339	24.1151	0.810173	0.462425	1.75201	0.0797723	0.983723	17.5237	23.7334	10.573	17.1212	16.7191	22.318	59.2345	25.6982
ENSG00000011201	ANOS1	157.163	-0.685183	0.391159	-1.75168	0.0798297	0.983723	219.843	139.902	172.692	243.502	131.572	175.02	37.1667	137.61
ENSG00000180155	LYNX1	7.10104	-1.14081	0.651414	-1.75129	0.0798967	0.983723	14.3376	5.62107	8.22343	11.4141	4.36151	7.0478	0	5.80282
ENSG00000090238	YPEL3	155.094	0.528332	0.30171	1.75112	0.0799246	0.983723	137.003	139.902	126.876	103.678	162.103	135.083	304.303	131.807
ENSG00000225383	SFTA1P	218.348	0.6831	0.390263	1.75036	0.0800567	0.983723	159.306	197.987	155.07	156.944	197.722	162.099	555.178	162.479
ENSG00000203867	RBM20	1.17519	2.84109	1.62565	1.74766	0.0805227	0.983723	0	0.624564	0	0	1.45384	2.34927	0	4.97385
ENSG00000157111	TMEM171	181.956	0.701557	0.401489	1.74739	0.0805697	0.983723	114.701	150.52	128.051	159.798	179.549	136.257	465.746	121.03
ENSG00000207561	MIR635	1.49399	2.33303	1.33549	1.74694	0.0806471	0.983723	1.59306	0.624564	0	0	2.90767	2.34927	1.16146	3.3159
ENSG00000198840	MT-ND3	148.882	0.605603	0.346826	1.74613	0.080788	0.983723	90.8046	145.523	110.429	123.653	130.118	128.035	329.855	132.636
ENSG00000127540	UQCR11	140.468	0.479618	0.275105	1.7434	0.0812634	0.983723	106.735	138.029	122.177	100.825	130.845	126.86	253.198	145.071
ENSG00000048707	VPS13D	52.7765	-0.472138	0.270826	-1.74333	0.0812766	0.983723	68.5017	49.9651	71.6613	57.0707	53.065	46.9853	30.198	44.7646
ENSG00000118181	RPS25	346.989	0.543732	0.311909	1.74324	0.0812914	0.983723	246.925	329.77	266.674	284.402	332.929	296.008	722.428	296.773
ENSG00000187522	HSPA14	73.4257	0.550938	0.316136	1.74272	0.0813823	0.983723	43.0127	65.5792	62.2631	65.6313	77.0533	71.6526	141.698	60.5151
ENSG00000223547	ZNF844	15.859	0.976539	0.560579	1.74202	0.0815055	0.983723	19.1168	11.8667	2.34955	9.51178	13.0845	38.7629	19.7448	12.4346
ENSG00000213337	ANKRD39	22.4039	0.772919	0.444102	1.74041	0.0817871	0.983723	17.5237	16.2387	21.146	11.4141	29.8036	14.0956	49.9428	19.0664
ENSG00000145431	PDGFC	402.013	-0.253583	0.145707	-1.74036	0.0817952	0.983723	446.058	414.086	440.541	448.005	362.005	409.947	364.698	330.761
ENSG00000269713	NBPF9	43.2706	-0.49698	0.285575	-1.74028	0.0818099	0.983723	65.3156	41.2212	49.3406	48.5101	36.3459	38.7629	24.3907	42.2777
ENSG00000134748	PRPF38A	93.3482	0.392291	0.22542	1.74026	0.0818129	0.983723	87.6185	90.5617	68.137	76.0943	101.769	85.7482	132.406	104.451
ENSG00000170448	NFXL1	29.2279	0.642361	0.369201	1.73987	0.0818825	0.983723	30.2682	22.4843	25.8451	14.2677	40.7074	21.1434	30.198	48.9095
ENSG00000125148	MT2A	1667.65	0.669457	0.384904	1.73928	0.0819853	0.983723	1062.57	1477.09	1374.49	1234.63	1524.35	1286.22	4219.58	1162.22
ENSG00000271334	LINC02104	2.61347	1.84112	1.05862	1.73918	0.0820032	0.983723	0	1.24913	0	2.85354	2.18075	2.34927	8.13022	4.14487
ENSG00000117724	CENPF	3.72146	-1.64031	0.943768	-1.73804	0.0822038	0.983723	3.18613	5.62107	9.39821	3.80471	0.726918	5.87317	1.16146	0
ENSG00000263823	AC009831.1	1.11015	-2.72181	1.56616	-1.73789	0.0822304	0.983723	4.77919	1.24913	1.17478	0.951178	0.726918	0	0	0
ENSG00000184381	PLA2G6	4.3466	1.51349	0.870951	1.73775	0.082255	0.983723	1.59306	3.12282	1.17478	2.85354	7.9961	10.5717	0	7.46077
ENSG00000185420	SMYD3	142.798	0.56476	0.325157	1.73688	0.0824076	0.983723	111.514	134.281	102.205	111.288	130.118	151.528	296.172	105.28
ENSG00000149761	NUDT22	106.719	0.467498	0.269186	1.73671	0.082438	0.983723	71.6879	125.537	82.2343	76.0943	120.668	115.114	163.766	98.648
ENSG00000137502	RAB30	32.0132	0.526791	0.303394	1.73633	0.082506	0.983723	27.0821	25.6071	30.5442	21.8771	28.3498	35.239	41.8126	45.5936
ENSG00000229656	ITGB1-DT	16.7292	1.07812	0.620956	1.73623	0.0825235	0.983723	6.37225	8.11933	18.7964	9.51178	17.446	8.22243	54.5886	10.7767
ENSG00000051620	HEBP2	335.519	0.451105	0.259863	1.73593	0.0825759	0.983723	285.158	299.791	271.373	276.793	368.548	283.087	599.313	300.089
ENSG00000075275	CELSR1	16.9103	-0.862687	0.497017	-1.73573	0.0826121	0.983723	30.2682	9.36846	16.4469	32.3401	13.0845	9.39707	6.96876	17.4085
ENSG00000158882	TOMM40L	28.6526	-0.5587	0.321989	-1.73515	0.082714	0.983723	46.1988	36.8493	29.3694	24.7306	23.2614	27.0166	18.5834	23.2113
ENSG00000159459	UBR1	117.829	-0.574281	0.331105	-1.73444	0.0828402	0.983723	175.237	92.4354	131.575	165.505	69.0572	130.384	55.7501	122.688
ENSG00000186642	PDE2A	10.245	-0.977365	0.56356	-1.73427	0.0828699	0.983723	7.96532	8.11933	25.8451	12.3653	7.9961	8.22243	8.13022	3.3159
ENSG00000129559	NEDD8	427.467	0.537317	0.309873	1.73399	0.0829202	0.983723	328.171	362.872	354.782	348.131	398.351	370.01	900.132	357.288
ENSG00000135317	SNX14	295.449	-0.292362	0.168744	-1.73258	0.0831711	0.983723	291.531	302.913	351.258	354.79	257.329	304.23	234.615	266.93
ENSG00000136710	CCDC115	222.901	0.389707	0.224936	1.73252	0.0831807	0.983723	160.899	200.485	193.838	214.966	265.325	210.259	336.823	200.612
ENSG00000132874	SLC14A2	0.77851	2.99987	1.73172	1.73231	0.0832185	0.983723	0	0	0	0	0.726918	2.34927	2.32292	0.828975
ENSG00000179954	SSC5D	3.61196	1.64046	0.947283	1.73176	0.0833169	0.983723	4.77919	2.49825	0	0	5.08843	9.39707	4.64584	2.48692
ENSG00000174652	ZNF266	40.6642	0.747152	0.431493	1.73155	0.0833537	0.983723	28.6751	28.7299	54.0397	10.463	42.8882	69.3034	34.8438	56.3703
ENSG00000110851	PRDM4	129.4	-0.493616	0.285228	-1.7306	0.0835224	0.983723	137.003	141.151	152.721	175.017	109.765	125.686	54.5886	139.268
ENSG00000171960	PPIH	61.2977	0.592733	0.342547	1.73037	0.0835638	0.983723	44.6058	57.4599	43.4667	48.5101	57.4265	61.0809	128.922	48.9095
ENSG00000182287	AP1S2	266.854	0.502341	0.290408	1.72977	0.0836705	0.983723	251.704	209.853	200.887	220.673	240.61	250.197	523.819	237.087
ENSG00000125743	SNRPD2	1012.1	0.576159	0.333142	1.72947	0.0837254	0.983723	774.229	873.14	796.498	805.648	933.363	795.227	2276.46	842.238
ENSG00000009413	REV3L	57.7265	-0.466325	0.269661	-1.7293	0.0837554	0.983723	78.0601	64.3301	57.564	68.4849	50.1574	64.6048	31.3594	47.2516
ENSG00000072042	RDH11	594.787	0.340394	0.196848	1.72922	0.0837696	0.983723	474.733	555.862	519.251	547.879	614.973	567.348	889.678	588.572
ENSG00000101246	ARFRP1	216.433	0.375614	0.217344	1.7282	0.0839525	0.983723	186.388	211.103	184.44	171.212	256.602	175.02	311.271	235.429
ENSG00000004059	ARF5	250.558	0.524938	0.303802	1.7279	0.0840068	0.983723	178.423	262.317	198.537	180.724	239.156	212.609	494.782	237.916
ENSG00000139985	ADAM21	11.3601	-0.856739	0.495903	-1.72763	0.0840539	0.983723	11.1514	14.9895	18.7964	14.2677	12.3576	7.0478	2.32292	9.9477
ENSG00000071626	DAZAP1	16.5608	-0.66006	0.38234	-1.72637	0.0842812	0.983723	23.896	23.1089	19.9712	14.2677	13.0845	15.2702	10.4531	12.4346
ENSG00000165633	VSTM4	48.3566	0.517531	0.299839	1.72603	0.0843423	0.983723	41.4197	28.7299	38.7676	51.3636	56.6996	61.0809	38.3282	70.4628
ENSG00000143891	GALM	38.0803	0.546539	0.316832	1.72501	0.0845255	0.983723	27.0821	40.5966	30.5442	23.7795	35.619	48.16	61.5574	37.3039
ENSG00000213096	ZNF254	26.3437	-0.74247	0.430498	-1.72468	0.0845855	0.983723	44.6058	26.2317	42.2919	19.0236	15.9922	35.239	11.6146	15.7505
ENSG00000213741	RPS29	288.618	0.602854	0.349616	1.72433	0.0846481	0.983723	189.575	299.791	202.061	223.527	277.683	209.085	641.126	266.101
ENSG00000161298	ZNF382	11.3524	-1.10709	0.642069	-1.72425	0.0846621	0.983723	27.0821	6.8702	24.6703	3.80471	5.08843	7.0478	10.4531	5.80282
ENSG00000203485	INF2	115.74	0.378902	0.219779	1.72401	0.0847057	0.983723	100.363	119.292	79.8848	100.825	118.488	131.559	160.282	115.227
ENSG00000198133	TMEM229B	7.55592	-1.19394	0.692673	-1.72367	0.0847674	0.983723	12.7445	5.62107	15.2721	8.56061	4.36151	10.5717	0	3.3159
ENSG00000175105	ZNF654	80.8892	-0.458589	0.266149	-1.72305	0.0848794	0.983723	86.0254	76.1968	105.73	107.483	71.238	79.8751	41.8126	78.7526
ENSG00000251669	FAM86EP	6.95324	1.08894	0.632644	1.72125	0.0852052	0.983723	4.77919	3.74738	2.34955	6.65825	3.63459	10.5717	13.9375	9.9477
ENSG00000184349	EFNA5	13.5315	-0.808848	0.469957	-1.72111	0.0852305	0.983723	23.896	16.8632	7.04866	20.9259	8.72302	9.39707	13.9375	7.46077
ENSG00000249936	RAC1P2	44.7857	0.647236	0.376059	1.7211	0.0852326	0.983723	23.896	39.9721	36.4181	38.0471	54.5189	32.8897	95.2397	37.3039
ENSG00000188428	BLOC1S5	55.8974	0.611408	0.35556	1.71956	0.085512	0.983723	55.7572	44.9686	44.6415	31.3889	49.4304	75.1765	106.854	38.9618
ENSG00000198087	CD2AP	96.7226	-0.45521	0.264728	-1.71954	0.0855168	0.983723	106.735	86.8144	123.351	131.263	74.8726	98.6692	53.4272	98.648
ENSG00000251442	LINC01094	10.6828	0.9527	0.554203	1.71904	0.0856062	0.983723	1.59306	5.62107	11.7478	9.51178	10.9038	11.7463	24.3907	9.9477
ENSG00000136450	SRSF1	114.362	-0.398899	0.23211	-1.71858	0.0856916	0.983723	151.341	114.92	113.953	141.726	122.849	108.066	76.6564	85.3844
ENSG00000213864	EEF1B2P2	3.49368	1.52242	0.886032	1.71825	0.0857517	0.983723	0	0.624564	4.6991	1.90236	2.90767	5.87317	6.96876	4.97385
ENSG00000178741	COX5A	536.984	0.528892	0.307913	1.71766	0.0858578	0.983723	406.231	477.791	429.968	443.249	520.473	462.806	1118.49	436.87
ENSG00000175643	RMI2	13.8581	0.850302	0.495065	1.71756	0.0858777	0.983723	6.37225	8.11933	17.6216	7.60943	19.6268	8.22243	26.7136	16.5795
ENSG00000099282	TSPAN15	23.7624	0.712412	0.414791	1.71752	0.0858842	0.983723	12.7445	23.7334	8.22343	25.6818	29.8036	29.3658	40.6511	19.8954
ENSG00000188690	UROS	451.416	0.367041	0.213803	1.71673	0.0860292	0.983723	337.729	460.303	418.22	358.594	468.862	428.741	682.939	455.936
ENSG00000233822	HIST1H2BN	10.8293	-0.791539	0.461233	-1.71614	0.0861366	0.983723	12.7445	14.9895	14.0973	13.3165	8.72302	3.5239	9.29168	9.9477
ENSG00000172301	COPRS	515.956	0.546819	0.318642	1.71609	0.0861448	0.983723	425.348	460.928	363.006	427.079	510.297	388.804	1092.93	459.252
ENSG00000065613	SLK	198.141	-0.325944	0.189947	-1.71597	0.0861668	0.983723	256.483	212.352	193.838	220.673	181.73	194.989	139.375	185.69
ENSG00000037637	FBXO42	168.271	-0.386463	0.225294	-1.71537	0.0862769	0.983723	194.354	168.632	180.915	218.771	139.568	194.989	108.016	140.926
ENSG00000176485	PLA2G16	166.232	0.359045	0.209342	1.71511	0.0863243	0.983723	127.445	159.888	133.924	158.847	169.372	172.671	242.745	164.966
ENSG00000099785	2024-03-02	164.81	0.371374	0.216534	1.71509	0.0863292	0.983723	140.19	141.776	144.497	147.433	161.376	158.576	255.521	169.111
ENSG00000124802	EEF1E1	46.8585	0.618756	0.360984	1.71408	0.0865144	0.983723	38.2335	26.8562	39.9424	42.803	39.2536	43.4614	98.7241	45.5936
ENSG00000185475	TMEM179B	294.961	0.531635	0.310293	1.71333	0.0866518	0.983723	227.808	265.44	238.479	232.088	290.04	222.006	608.605	275.22
ENSG00000135218	CD36	120.013	0.459348	0.268143	1.71307	0.0866993	0.983723	127.445	78.0705	123.351	77.0455	111.945	132.734	183.511	126.004
ENSG00000115268	RPS15	679.076	0.568739	0.332045	1.71283	0.0867432	0.983723	469.954	639.553	540.397	536.465	712.38	474.552	1465.76	593.546
ENSG00000052802	MSMO1	2017.55	0.368171	0.214991	1.7125	0.0868052	0.983723	2005.67	1691.94	1655.26	1693.1	2015.74	2100.24	3181.24	1797.22
ENSG00000104722	NEFM	7.51577	1.05813	0.618001	1.71218	0.0868644	0.983723	9.55838	3.74738	1.17478	5.70707	13.0845	12.921	8.13022	5.80282
ENSG00000107938	EDRF1	44.1811	-0.597249	0.349097	-1.71084	0.0871111	0.983723	52.5711	46.8423	43.4667	69.436	31.9844	58.7317	19.7448	30.6721
ENSG00000125971	DYNLRB1	483.366	0.586022	0.342608	1.71047	0.0871783	0.983723	340.916	432.198	386.501	385.227	473.951	360.612	1092.93	394.592
ENSG00000198846	TOX	25.5791	0.61793	0.361291	1.71034	0.0872028	0.983723	11.1514	29.3545	16.4469	21.8771	27.6229	28.1912	30.198	39.7908
ENSG00000112851	ERBIN	234.769	-0.618796	0.361977	-1.70949	0.0873605	0.983723	313.834	205.481	325.413	293.914	209.352	240.8	63.8803	225.481
ENSG00000234797	RPS3AP6	3.17462	1.6688	0.976273	1.70936	0.0873846	0.983723	1.59306	1.24913	1.17478	1.90236	1.45384	9.39707	6.96876	1.65795
ENSG00000155760	FZD7	32.5132	-0.543466	0.317973	-1.70916	0.0874211	0.983723	47.7919	31.8527	32.8937	42.803	23.9883	29.3658	17.4219	33.988
ENSG00000198546	ZNF511	16.5087	0.699531	0.409295	1.70911	0.0874306	0.983723	9.55838	11.2421	14.0973	15.2189	24.7152	15.2702	27.875	14.0926
ENSG00000148834	GSTO1	1251.25	0.623507	0.365034	1.70808	0.0876217	0.983723	895.302	1150.45	970.365	922.643	1204.5	952.628	3004.7	909.385
ENSG00000128309	MPST	201.942	0.505127	0.295964	1.70672	0.0878739	0.983723	133.817	210.478	150.371	171.212	216.622	146.829	368.183	218.02
ENSG00000117479	SLC19A2	34	-0.538687	0.315785	-1.70587	0.0880324	0.983723	43.0127	35.6001	42.2919	39.9495	26.896	42.2868	22.0677	19.8954
ENSG00000233276	GPX1	1144.68	0.51506	0.301949	1.70579	0.0880476	0.983723	829.986	1066.75	933.947	937.862	1163.07	866.879	2313.63	1045.34
ENSG00000135525	MAP7	2.0538	2.08673	1.22374	1.70521	0.0881556	0.983723	1.59306	0	0	1.90236	3.63459	1.17463	2.32292	5.80282
ENSG00000185085	INTS5	122.403	-0.395919	0.232239	-1.70479	0.0882334	0.983723	103.549	140.527	170.342	141.726	119.215	116.289	78.9793	108.596
ENSG00000106400	ZNHIT1	565.154	0.540673	0.317232	1.70435	0.0883161	0.983723	383.928	515.265	476.959	464.175	527.743	461.631	1197.47	494.069
ENSG00000242125	SNHG3	13.1621	0.769425	0.451491	1.70419	0.0883464	0.983723	4.77919	14.365	8.22343	10.463	22.5345	12.921	16.2604	15.7505
ENSG00000070669	ASNS	1.44655	-2.39705	1.40687	-1.70382	0.0884145	0.983723	3.18613	4.37195	1.17478	0.951178	0.726918	0	1.16146	0
ENSG00000180801	ARSJ	509.73	-0.268215	0.157461	-1.70337	0.0884982	0.983723	597.399	497.777	545.096	589.731	456.505	485.124	397.219	508.99
ENSG00000253251	AC008560.1	6.13731	1.18838	0.697692	1.70331	0.0885107	0.983723	3.18613	3.74738	8.22343	0	9.44994	9.39707	9.29168	5.80282
ENSG00000267904	AC024075.1	0.780157	3.00406	1.7638	1.70318	0.0885351	0.983723	0	0	0	0	0.726918	3.5239	1.16146	0.828975
ENSG00000181649	PHLDA2	887.688	0.599189	0.351928	1.70259	0.0886454	0.983723	653.156	809.435	703.691	656.313	790.16	690.684	2080.18	717.892
ENSG00000233527	ZNF529-AS1	10.8831	1.18194	0.69464	1.70152	0.0888453	0.983723	4.77919	9.99302	2.34955	8.56061	6.54226	8.22243	38.3282	8.28975
ENSG00000103942	HOMER2	5.22928	1.46861	0.863407	1.70095	0.088952	0.983723	6.37225	1.87369	3.52433	0	1.45384	7.0478	11.6146	9.9477
ENSG00000115128	SF3B6	415.474	0.547641	0.321968	1.70092	0.0889582	0.983723	324.985	359.124	331.287	333.864	415.07	315.976	892.001	351.485
ENSG00000228124	AL096678.1	0.776863	2.99993	1.76432	1.70033	0.0890682	0.983723	0	0	0	0	0.726918	1.17463	3.48438	0.828975
ENSG00000188785	ZNF548	51.701	-0.634615	0.373244	-1.70027	0.0890806	0.983723	87.6185	54.9616	55.2145	55.1684	49.4304	51.6839	13.9375	45.5936
ENSG00000172244	C5orf34	7.41681	-1.19936	0.705454	-1.70012	0.0891078	0.983723	23.896	10.6176	3.52433	3.80471	4.36151	2.34927	5.8073	4.97385
ENSG00000131374	TBC1D5	139.951	-0.534251	0.314249	-1.70009	0.0891148	0.983723	132.224	136.779	180.915	213.064	119.215	122.162	56.9115	158.334
ENSG00000273802	HIST1H2BG	7.05156	1.06174	0.62479	1.69936	0.0892517	0.983723	4.77919	5.62107	4.6991	2.85354	6.54226	5.87317	18.5834	7.46077
ENSG00000143575	HAX1	679.361	0.458037	0.269755	1.69797	0.0895134	0.983723	476.326	653.918	615.583	542.172	723.284	545.03	1225.34	653.232
ENSG00000198825	INPP5F	46.6209	-0.480997	0.283428	-1.69707	0.0896842	0.983723	60.5364	50.5897	38.7676	67.5337	40.7074	48.16	30.198	36.4749
ENSG00000104129	DNAJC17	31.1459	0.624	0.367729	1.6969	0.0897153	0.983723	20.7098	29.3545	24.6703	21.8771	26.896	36.4136	62.7188	26.5272
ENSG00000168765	GSTM4	99.4243	0.508302	0.299567	1.69679	0.0897364	0.983723	87.6185	84.3161	85.7586	70.3872	100.315	78.7004	190.479	97.819
ENSG00000165516	KLHDC2	309.223	0.356946	0.210394	1.69656	0.0897793	0.983723	219.843	284.801	292.519	285.354	318.39	290.134	461.1	321.642
ENSG00000125995	ROMO1	345.853	0.563289	0.332365	1.69479	0.0901158	0.983723	250.111	327.271	263.15	274.891	352.555	243.149	745.657	310.037
ENSG00000177600	RPLP2	476.396	0.584509	0.344909	1.69468	0.0901368	0.983723	304.275	449.686	404.123	365.253	508.843	334.771	1048.8	395.421
ENSG00000126432	PRDX5	1962.65	0.501081	0.295825	1.69384	0.0902953	0.983723	1376.41	1838.72	1667.01	1617	1937.96	1613.95	3923.41	1726.75
ENSG00000177426	TGIF1	235.89	0.415038	0.245087	1.69343	0.0903734	0.983723	164.086	246.078	202.061	194.04	252.241	222.006	384.443	222.165
ENSG00000156017	CARNMT1	82.416	-0.459109	0.271248	-1.69258	0.0905353	0.983723	122.666	78.0705	78.71	103.678	72.6918	86.9229	45.2969	71.2918
ENSG00000104901	DKKL1	0.735303	2.94078	1.73762	1.69242	0.0905662	0.983723	0	0	0	0	0.726918	1.17463	2.32292	1.65795
ENSG00000197747	S100A10	891.43	0.580422	0.343068	1.69186	0.0906734	0.983723	605.364	835.666	740.109	675.337	811.968	703.605	2023.26	736.129
ENSG00000174373	RALGAPA1	23.6856	-0.770806	0.455618	-1.69178	0.0906882	0.983723	36.6405	21.8597	27.0198	34.2424	13.8114	30.5405	4.64584	20.7244
ENSG00000155816	FMN2	24.8193	0.595002	0.351722	1.69168	0.0907068	0.983723	19.1168	21.2352	18.7964	19.0236	18.173	31.7151	40.6511	29.8431
ENSG00000122068	FYTTD1	428.836	-0.291047	0.172078	-1.69136	0.0907675	0.983723	514.56	444.689	422.919	506.978	416.524	431.09	315.917	378.012
ENSG00000143947	RPS27A	879.665	0.545076	0.322324	1.69108	0.0908209	0.983723	595.806	831.919	694.293	738.115	870.121	664.842	1868.79	773.433
ENSG00000174500	GCSAM	1.39582	-2.41214	1.42652	-1.69093	0.0908509	0.983723	3.18613	2.49825	1.17478	2.85354	1.45384	0	0	0
ENSG00000227051	C14orf132	74.6536	-0.487039	0.288164	-1.69014	0.0910005	0.983723	89.2116	75.5722	95.1568	89.4108	69.7841	83.399	32.5209	62.1731
ENSG00000081870	HSPB11	87.5524	0.530659	0.314059	1.68968	0.0910895	0.983723	74.874	85.5652	57.564	67.5337	90.1379	68.1287	169.573	87.0423
ENSG00000082516	GEMIN5	70.1756	-0.523344	0.309851	-1.68902	0.0912161	0.983723	86.0254	80.5687	86.9334	78.9478	65.4226	56.3824	26.7136	80.4105
ENSG00000173141	MRPL57	190.294	0.585644	0.346795	1.68873	0.0912708	0.983723	132.224	176.752	153.896	144.579	195.541	150.353	423.933	145.071
ENSG00000279207	AC015813.6	4.85749	-1.89265	1.12077	-1.68872	0.0912739	0.983723	4.77919	5.62107	19.9712	0	1.45384	5.87317	1.16146	0
ENSG00000122970	IFT81	61.9537	0.436378	0.258525	1.68795	0.0914201	0.983723	43.0127	42.4703	54.0397	70.3872	65.4226	74.0019	82.4637	63.831
ENSG00000089327	FXYD5	422.03	0.461114	0.273186	1.68791	0.0914278	0.983723	307.461	409.714	343.035	358.594	444.147	358.263	777.017	378.012
ENSG00000116586	LAMTOR2	272.421	0.572015	0.338923	1.68774	0.0914607	0.983723	215.064	251.075	222.033	187.382	259.51	193.815	599.313	251.179
ENSG00000270157	AC004918.3	3.0571	-1.66896	0.989087	-1.68738	0.0915311	0.983723	3.18613	8.11933	4.6991	2.85354	1.45384	0	0	4.14487
ENSG00000130520	LSM4	496.186	0.501167	0.297011	1.68737	0.0915328	0.983723	356.846	514.641	413.521	356.692	527.743	409.947	958.205	431.896
ENSG00000165244	ZNF367	1.96595	-2.80707	1.66447	-1.68646	0.0917065	0.983723	7.96532	0	5.87388	0	0.726918	0	1.16146	0
ENSG00000139372	TDG	114.612	-0.346122	0.205247	-1.68636	0.0917257	0.983723	135.41	129.285	119.827	129.36	122.122	108.066	88.271	84.5554
ENSG00000224578	HNRNPA1P48	3.26112	2.00804	1.19076	1.68635	0.0917276	0.983723	0	4.37195	0	0	1.45384	2.34927	10.4531	7.46077
ENSG00000255031	AP002807.1	2.94775	-1.50648	0.893928	-1.68524	0.0919431	0.983723	3.18613	4.99651	4.6991	4.75589	1.45384	1.17463	0	3.3159
ENSG00000155957	TMBIM4	71.0302	0.469617	0.278951	1.68351	0.0922767	0.983723	60.5364	48.716	62.2631	66.5825	63.2419	72.8273	121.953	72.1208
ENSG00000130414	NDUFA10	575.83	0.35866	0.213122	1.68288	0.0923979	0.983723	447.651	583.967	480.483	504.125	621.515	518.013	878.064	572.821
ENSG00000166337	TAF10	214.861	0.534526	0.318047	1.68065	0.0928305	0.983723	135.41	192.99	170.342	201.65	225.345	164.449	435.548	193.151
ENSG00000228878	SEPT7-AS1	0.724192	2.92251	1.73904	1.68053	0.092855	0.983723	0	0	0	0	1.45384	2.34927	1.16146	0.828975
ENSG00000138180	CEP55	6.71361	1.077	0.640874	1.68051	0.0928574	0.983723	1.59306	6.24564	5.87388	2.85354	8.72302	4.69853	16.2604	7.46077
ENSG00000164949	GEM	151.222	-0.326344	0.194197	-1.68048	0.0928643	0.983723	176.83	172.38	153.896	171.212	138.114	125.686	109.177	162.479
ENSG00000229539	AL353194.1	3.54963	1.57166	0.935381	1.68024	0.0929106	0.983723	3.18613	1.87369	1.17478	0.951178	0.726918	7.0478	9.29168	4.14487
ENSG00000180879	SSR4	615.239	0.558951	0.332716	1.67996	0.0929644	0.983723	407.824	582.718	515.727	482.247	598.981	482.774	1342.65	508.99
ENSG00000204116	CHIC1	21.6403	-0.771849	0.459551	-1.67957	0.0930409	0.983723	33.4543	16.2387	38.7676	21.8771	17.446	19.9688	4.64584	20.7244
ENSG00000119650	IFT43	140.557	0.505374	0.300928	1.67939	0.0930768	0.983723	86.0254	134.906	132.75	109.386	149.018	112.765	263.651	135.952
ENSG00000185513	L3MBTL1	9.22604	1.17272	0.698693	1.67845	0.0932591	0.983723	4.77919	4.37195	14.0973	0	15.2653	11.7463	6.96876	16.5795
ENSG00000197948	FCHSD1	62.0341	-0.545374	0.32493	-1.67844	0.0932621	0.983723	81.2462	61.2072	58.7388	94.1667	51.6112	61.0809	24.3907	63.831
ENSG00000232838	PET117	1.98345	2.03708	1.21399	1.678	0.0933469	0.983723	0	0	2.34955	0.951178	2.90767	3.5239	1.16146	4.97385
ENSG00000106588	PSMA2	13.4642	-0.80067	0.477224	-1.67776	0.0933931	0.983723	14.3376	11.2421	18.7964	23.7795	10.9038	10.5717	13.9375	4.14487
ENSG00000171860	C3AR1	15.9859	0.832516	0.496251	1.67761	0.0934232	0.983723	6.37225	14.365	18.7964	5.70707	11.6307	16.4449	31.3594	23.2113
ENSG00000103932	RPAP1	119.485	-0.438049	0.261145	-1.67742	0.0934613	0.983723	117.887	131.158	167.993	133.165	92.3186	120.987	63.8803	128.491
ENSG00000105583	WDR83OS	207.119	0.590855	0.35227	1.67728	0.0934877	0.983723	159.306	174.253	167.993	158.847	206.445	143.305	472.714	174.085
ENSG00000172590	MRPL52	291.575	0.54295	0.323711	1.67727	0.0934902	0.983723	230.994	282.303	220.858	214.015	276.229	225.53	619.058	263.614
ENSG00000165868	HSPA12A	8.97164	-0.990739	0.590716	-1.67718	0.0935066	0.983723	4.77919	18.1123	17.6216	6.65825	5.08843	9.39707	3.48438	6.6318
ENSG00000166359	WDR88	1.81605	-2.17963	1.29959	-1.67716	0.0935114	0.983723	6.37225	3.74738	1.17478	0.951178	1.45384	0	0	0.828975
ENSG00000278611	ZNF426-DT	3.96143	1.41679	0.844902	1.67687	0.0935671	0.983723	3.18613	0.624564	2.34955	2.85354	5.81535	9.39707	5.8073	1.65795
ENSG00000123700	KCNJ2	3.34316	1.74531	1.04138	1.67596	0.0937465	0.983723	3.18613	1.87369	1.17478	0	2.18075	7.0478	10.4531	0.828975
ENSG00000041353	RAB27B	20.362	-0.644584	0.384701	-1.67555	0.0938271	0.983723	30.2682	20.6106	29.3694	19.0236	12.3576	15.2702	24.3907	11.6056
ENSG00000167526	RPL13	1162.5	0.522644	0.311945	1.67544	0.0938483	0.983723	724.844	1136.71	968.015	985.421	1230.67	849.26	2324.08	1080.98
ENSG00000245812	LINC02202	3.29504	1.42848	0.852707	1.67523	0.0938898	0.983723	0	2.49825	2.34955	1.90236	7.26918	5.87317	2.32292	4.14487
ENSG00000121690	DEPDC7	38.0512	0.576008	0.343846	1.67519	0.0938967	0.983723	33.4543	31.8527	30.5442	25.6818	24.7152	50.5092	66.2032	41.4487
ENSG00000130997	POLN	8.90789	1.02196	0.610394	1.67427	0.0940782	0.983723	12.7445	3.12282	2.34955	6.65825	18.8999	10.5717	6.96876	9.9477
ENSG00000253948	AC104986.2	5.40303	1.5909	0.950347	1.67402	0.0941266	0.983723	1.59306	1.24913	0	7.60943	2.18075	5.87317	19.7448	4.97385
ENSG00000146678	IGFBP1	2.82381	2.11471	1.26349	1.67371	0.0941876	0.983723	0	0	2.34955	1.90236	4.36151	3.5239	10.4531	0
ENSG00000130396	AFDN	6.15103	1.00896	0.6033	1.6724	0.0944451	0.983723	3.18613	4.37195	3.52433	4.75589	6.54226	10.5717	10.4531	5.80282
ENSG00000164885	CDK5	168.27	0.479621	0.28705	1.67086	0.0947486	0.983723	116.294	169.257	124.526	150.286	177.368	129.21	304.303	174.914
ENSG00000103064	SLC7A6	40.1386	-0.480452	0.287569	-1.67074	0.0947738	0.983723	43.0127	37.4738	54.0397	53.266	29.8036	30.5405	29.0365	43.9357
ENSG00000170791	CHCHD7	210.098	0.471548	0.282372	1.66996	0.0949283	0.983723	189.575	181.123	158.595	174.066	189.726	210.259	398.381	179.059
ENSG00000188770	OPTC	0.742081	-2.99302	1.79239	-1.66985	0.0949483	0.983723	3.18613	0.624564	1.17478	0.951178	0	0	0	0
ENSG00000197619	ZNF615	30.1241	-0.573735	0.34368	-1.66939	0.0950409	0.983723	44.6058	32.4773	28.1946	39.9495	23.9883	25.8419	12.7761	33.159
ENSG00000247516	MIR4458HG	49.6145	0.620867	0.371963	1.66916	0.0950852	0.983723	38.2335	39.9721	36.4181	40.9007	36.3459	44.6361	111.5	48.9095
ENSG00000272341	AL137003.2	1.49273	2.37249	1.42202	1.6684	0.0952371	0.983723	0	0.624564	1.17478	0	2.18075	0	4.64584	3.3159
ENSG00000079263	SP140	6.76208	1.01481	0.608303	1.66826	0.0952637	0.983723	4.77919	4.37195	7.04866	1.90236	8.72302	5.87317	13.9375	7.46077
ENSG00000211459	MT-RNR1	1552.3	0.551869	0.330934	1.66761	0.0953927	0.983723	1019.56	1361.55	1271.11	1382.06	1411.68	1290.92	3412.37	1269.16
ENSG00000100154	TTC28	32.5812	-0.638918	0.383152	-1.66753	0.0954087	0.983723	33.4543	27.4808	36.4181	61.8266	26.1691	29.3658	12.7761	33.159
ENSG00000085871	MGST2	101.922	0.479971	0.287864	1.66735	0.0954446	0.983723	90.8046	83.6915	82.2343	83.7037	117.761	76.3512	184.672	96.1611
ENSG00000156650	KAT6B	68.7315	-0.43186	0.259017	-1.6673	0.0954542	0.983723	87.6185	74.9476	66.9622	85.6061	55.9727	81.0497	54.5886	43.1067
ENSG00000067064	IDI1	2125.47	0.373158	0.223836	1.66711	0.0954933	0.983723	1957.88	1716.3	1891.39	1842.43	2083.35	2204.79	3468.12	1839.49
ENSG00000174804	FZD4	75.9998	-0.508743	0.305248	-1.66665	0.0955832	0.983723	105.142	73.6985	86.9334	92.2643	68.3303	88.0975	31.3594	62.1731
ENSG00000214046	SMIM7	138.646	0.423248	0.253997	1.66635	0.0956435	0.983723	125.852	119.292	103.38	124.604	141.749	128.035	236.938	129.32
ENSG00000173409	ARV1	165.573	0.423818	0.254469	1.6655	0.0958128	0.983723	130.631	151.769	148.022	134.116	183.91	148.004	282.235	145.9
ENSG00000187605	TET3	10.0597	-0.966589	0.58038	-1.66544	0.0958245	0.983723	14.3376	9.36846	18.7964	11.4141	5.08843	7.0478	1.16146	13.2636
ENSG00000181827	RFX7	24.595	-0.544739	0.327092	-1.6654	0.095833	0.983723	25.489	28.7299	28.1946	34.2424	23.2614	24.6673	13.9375	18.2374
ENSG00000175054	ATR	93.6763	-0.63937	0.383953	-1.66523	0.0958663	0.983723	132.224	76.1968	92.8073	155.993	90.1379	104.542	27.875	69.6339
ENSG00000278845	MRPL45	161.966	0.389017	0.233644	1.665	0.0959128	0.983723	130.631	160.513	123.351	144.579	176.641	159.75	254.36	145.9
ENSG00000213846	AC098614.1	26.5151	0.603348	0.362387	1.66493	0.0959269	0.983723	20.7098	18.1123	21.146	23.7795	27.6229	34.0644	47.6199	19.0664
ENSG00000197582	GPX1P1	30.2461	0.648887	0.389759	1.66484	0.0959443	0.983723	17.5237	31.2282	27.0198	17.1212	31.9844	27.0166	62.7188	27.3562
ENSG00000114374	USP9Y	61.2929	-0.72278	0.434263	-1.66438	0.096036	0.983723	90.8046	53.7125	112.778	49.4613	52.3381	49.3346	13.9375	67.9759
ENSG00000166704	ZNF606	32.0681	-0.540977	0.32514	-1.66383	0.0961465	0.983723	30.2682	30.6036	48.1658	43.7542	29.8036	27.0166	16.2604	30.6721
ENSG00000011243	AKAP8L	167.448	0.324555	0.195079	1.66371	0.0961695	0.983723	130.631	185.495	133.924	141.726	186.091	180.894	206.74	174.085
ENSG00000120784	ZFP30	13.6446	-0.78281	0.470668	-1.66319	0.0962748	0.983723	14.3376	9.36846	17.6216	27.5842	7.26918	11.7463	10.4531	10.7767
ENSG00000108107	RPL28	223.675	0.490014	0.294729	1.66259	0.0963942	0.983723	129.038	215.474	199.712	197.845	245.698	196.164	412.318	193.151
ENSG00000077152	UBE2T	50.9943	0.669222	0.40274	1.66167	0.0965782	0.983723	41.4197	35.6001	48.1658	32.3401	57.4265	35.239	119.63	38.1328
ENSG00000100292	HMOX1	188.714	0.329198	0.198163	1.66125	0.0966634	0.983723	148.155	173.629	185.615	160.749	210.806	169.147	260.167	201.441
ENSG00000196159	FAT4	38.2324	-0.631564	0.380203	-1.66112	0.0966888	0.983723	49.385	31.8527	38.7676	66.5825	31.2575	38.7629	12.7761	36.4749
ENSG00000176463	SLCO3A1	53.5692	-0.506375	0.305074	-1.65984	0.0969462	0.983723	60.5364	58.709	71.6613	61.8266	49.4304	44.6361	22.0677	59.6862
ENSG00000242294	STAG3L5P	2.08523	-1.75607	1.05821	-1.65947	0.097022	0.983723	3.18613	2.49825	2.34955	4.75589	0.726918	1.17463	1.16146	0.828975
ENSG00000110700	RPS13	591.334	0.536702	0.323427	1.65942	0.097031	0.983723	452.43	525.258	461.687	489.857	556.092	442.837	1275.28	527.228
ENSG00000137207	YIPF3	1080.57	0.322978	0.19467	1.6591	0.0970947	0.983723	868.22	1006.8	996.21	967.349	1080.93	1014.88	1610.95	1099.22
ENSG00000167468	GPX4	895.552	0.532416	0.320918	1.65904	0.097108	0.983723	586.247	909.989	749.507	681.044	936.998	723.574	1852.53	724.524
ENSG00000174501	ANKRD36C	30.108	-0.555348	0.334821	-1.65864	0.0971881	0.983723	49.385	33.1019	35.2433	26.633	23.9883	31.7151	15.099	25.6982
ENSG00000102265	TIMP1	3822.93	0.53419	0.322137	1.65827	0.0972633	0.983723	2689.09	3349.54	3362.21	3090.38	3649.86	3217.32	8238.24	2986.8
ENSG00000142541	RPL13A	968.946	0.467653	0.282023	1.65821	0.0972755	0.983723	664.308	931.225	812.945	842.744	1018.41	775.258	1818.85	887.832
ENSG00000230513	THAP7-AS1	3.1781	1.43379	0.864878	1.65779	0.0973592	0.983723	1.59306	1.87369	2.34955	0.951178	3.63459	8.22243	3.48438	3.3159
ENSG00000134202	GSTM3	97.4561	0.529051	0.319164	1.65762	0.0973948	0.983723	78.0601	86.8144	71.6613	81.8014	106.857	69.3034	193.964	91.1872
ENSG00000134369	NAV1	365.363	-0.502507	0.30318	-1.65746	0.0974275	0.983723	540.049	358.5	386.501	429.933	308.213	373.533	144.021	382.157
ENSG00000172732	MUS81	117.089	-0.324805	0.195981	-1.65733	0.097452	0.983723	135.41	118.667	146.847	120.8	96.6801	117.463	90.5939	110.254
ENSG00000122873	CISD1	200.668	0.553553	0.334089	1.6569	0.0975393	0.983723	141.783	194.864	167.993	144.579	199.176	146.829	428.579	181.545
ENSG00000244564	AC096888.1	3.53709	-1.42181	0.858329	-1.65649	0.0976235	0.983723	1.59306	5.62107	8.22343	4.75589	1.45384	1.17463	4.64584	0.828975
ENSG00000272335	AC093297.2	1.10014	-2.80648	1.69445	-1.65628	0.0976644	0.983723	0	1.24913	5.87388	0.951178	0.726918	0	0	0
ENSG00000280383	Z95331.1	1.8517	2.16551	1.30833	1.65518	0.0978889	0.983723	0	1.24913	1.17478	0	0.726918	4.69853	1.16146	5.80282
ENSG00000131943	C19orf12	152.689	-0.275391	0.166384	-1.65515	0.0978935	0.983723	159.306	174.253	173.867	160.749	133.026	145.655	131.245	143.413
ENSG00000167291	TBC1D16	51.2289	-0.574203	0.346922	-1.65513	0.0978974	0.983723	58.9434	48.716	52.8649	85.6061	49.4304	43.4614	18.5834	52.2254
ENSG00000182154	MRPL41	228.829	0.60287	0.364307	1.65484	0.0979569	0.983723	164.086	221.72	176.216	163.603	242.064	158.576	526.141	178.23
ENSG00000143314	MRPL24	252.555	0.485547	0.293462	1.65455	0.0980159	0.983723	181.609	236.71	207.935	214.015	237.702	197.338	488.975	256.153
ENSG00000213341	CHUK	196.495	-0.369109	0.223177	-1.65388	0.0981513	0.983723	261.262	225.468	233.78	166.456	151.926	202.037	137.052	193.98
ENSG00000025796	SEC63	462.98	0.268233	0.162194	1.65378	0.0981723	0.983723	463.582	407.84	425.269	384.276	508.116	521.537	567.954	425.264
ENSG00000145335	SNCA	39.7293	0.696213	0.420992	1.65374	0.0981796	0.983723	35.0474	26.2317	29.3694	30.4377	27.6229	36.4136	98.7241	33.988
ENSG00000173889	PHC3	68.6566	-0.439409	0.265793	-1.6532	0.0982901	0.983723	82.8393	67.4529	81.0595	84.6549	50.1574	84.5736	42.974	55.5413
ENSG00000147123	NDUFB11	276.543	0.562341	0.340158	1.65318	0.0982949	0.983723	178.423	276.682	234.955	201.65	289.313	203.212	593.506	234.6
ENSG00000180822	PSMG4	74.4837	0.486191	0.29413	1.65298	0.0983355	0.983723	57.3503	72.4494	59.9136	57.0707	68.3303	65.7795	137.052	77.9236
ENSG00000137806	NDUFAF1	157.871	0.512823	0.310271	1.65282	0.0983669	0.983723	124.259	143.65	128.051	123.653	167.191	106.892	310.11	159.163
ENSG00000228300	C19orf24	113.137	0.496212	0.300341	1.65216	0.098502	0.983723	78.0601	118.043	92.8073	84.6549	107.584	97.4946	213.709	112.741
ENSG00000176142	TMEM39A	238.036	-0.270693	0.163876	-1.65181	0.0985727	0.983723	288.345	222.345	258.451	273.939	218.802	217.307	219.516	205.586
ENSG00000248927	AC114284.1	11.0488	0.785888	0.475776	1.6518	0.0985749	0.983723	7.96532	9.36846	7.04866	7.60943	13.8114	10.5717	22.0677	9.9477
ENSG00000198721	ECI2	194.445	0.553106	0.334862	1.65174	0.0985869	0.983723	140.19	163.011	175.042	151.237	189.726	157.401	423.933	155.018
ENSG00000112514	CUTA	716.943	0.519387	0.314509	1.65142	0.0986521	0.983723	538.456	660.164	617.932	539.318	695.661	550.903	1500.61	632.508
ENSG00000146701	MDH2	1251.95	0.436801	0.264575	1.65095	0.098749	0.983723	933.535	1234.76	1020.88	1064.37	1277.2	1051.3	2267.17	1166.37
ENSG00000115896	PLCL1	31.4577	0.612692	0.37116	1.65075	0.09879	0.983723	22.3029	31.8527	21.146	22.8283	18.8999	38.7629	51.1042	44.7646
ENSG00000149806	FAU	279.918	0.601377	0.364391	1.65036	0.0988693	0.983723	156.12	264.815	250.227	216.869	281.317	204.386	637.642	227.968
ENSG00000134222	PSRC1	8.24157	-0.901709	0.546495	-1.64999	0.0989459	0.983723	9.55838	13.1158	14.0973	5.70707	3.63459	7.0478	6.96876	5.80282
ENSG00000130772	MED18	72.9722	0.434422	0.263311	1.64984	0.0989748	0.983723	62.1295	79.3196	64.6127	40.9007	77.7802	96.3199	90.5939	72.1208
ENSG00000134780	DAGLA	9.85235	-1.01363	0.614465	-1.64961	0.0990237	0.983723	11.1514	9.36846	14.0973	19.0236	10.9038	1.17463	2.32292	10.7767
ENSG00000184857	TMEM186	34.3526	0.532489	0.322831	1.64944	0.0990585	0.983723	22.3029	33.1019	28.1946	27.5842	39.2536	27.0166	59.2345	38.1328
ENSG00000154710	RABGEF1	12.5609	0.734799	0.445687	1.64869	0.0992113	0.983723	6.37225	9.99302	9.39821	11.4141	15.2653	9.39707	22.0677	16.5795
ENSG00000180998	GPR137C	1.76723	-2.07681	1.25981	-1.64852	0.0992469	0.983723	4.77919	2.49825	3.52433	0.951178	0.726918	0	0	1.65795
ENSG00000109536	FRG1	56.2437	0.496259	0.301039	1.64849	0.0992526	0.983723	46.1988	58.0844	41.1172	39.9495	54.5189	50.5092	99.8856	59.6862
ENSG00000162231	NXF1	207.752	-0.377253	0.228874	-1.6483	0.0992911	0.983723	280.379	214.85	227.907	218.771	220.256	170.322	123.115	206.415
ENSG00000121039	RDH10	126.466	-0.390365	0.236857	-1.6481	0.099332	0.983723	114.701	129.909	163.294	165.505	99.5878	133.908	81.3022	123.517
ENSG00000102898	NUTF2	702.407	0.446886	0.27118	1.64793	0.0993671	0.983723	530.49	670.157	599.136	576.414	689.118	624.905	1308.97	620.073
ENSG00000132004	FBXW9	47.407	0.547801	0.332533	1.64736	0.0994839	0.983723	33.4543	53.0879	30.5442	35.1936	60.3342	51.6839	80.1408	34.8169
ENSG00000238279	BX470102.1	1.4702	2.26838	1.37726	1.64703	0.099552	0.983723	1.59306	0.624564	0	0	0.726918	2.34927	2.32292	4.14487
ENSG00000084710	EFR3B	3.51877	1.55472	0.944034	1.64689	0.099581	0.983723	0	3.12282	3.52433	0	5.81535	8.22243	5.8073	1.65795
ENSG00000148908	RGS10	42.4676	0.615601	0.3738	1.64687	0.0995838	0.983723	22.3029	39.9721	34.0685	36.1448	41.4343	37.5883	91.7554	36.4749
ENSG00000204520	MICA	1729.79	0.393757	0.239139	1.64656	0.0996483	0.983723	1521.38	1579.52	1522.51	1356.38	1758.42	1609.25	2960.56	1530.29
ENSG00000108528	SLC25A11	411.882	0.362129	0.219963	1.64632	0.0996977	0.983723	280.379	397.223	393.55	368.106	417.251	398.201	628.35	412
ENSG00000151849	CENPJ	19.8767	-0.623925	0.379115	-1.64574	0.099817	0.983723	27.0821	17.4878	32.8937	19.9747	15.2653	17.6195	10.4531	18.2374
ENSG00000135249	RINT1	140.231	0.287585	0.174818	1.64506	0.099958	0.983723	122.666	133.657	115.128	132.214	145.384	151.528	169.573	151.702
ENSG00000147164	SNX12	22.119	0.678538	0.412571	1.64466	0.10004	0.983723	19.1168	14.9895	18.7964	15.2189	22.5345	17.6195	48.7813	19.8954
ENSG00000187240	DYNC2H1	60.0254	-0.535889	0.325914	-1.64426	0.100122	0.983723	71.6879	56.8353	66.9622	88.4596	45.0689	79.8751	29.0365	42.2777
ENSG00000251141	MRPS30-DT	3.70833	1.53794	0.935494	1.64398	0.100179	0.983723	1.59306	1.87369	0	3.80471	1.45384	3.5239	11.6146	5.80282
ENSG00000184254	ALDH1A3	72.9862	-0.466485	0.28388	-1.64325	0.100332	0.983723	93.9908	59.9581	89.283	96.069	66.1496	83.399	51.1042	43.9357
ENSG00000083807	SLC27A5	16.754	0.753388	0.458533	1.64304	0.100375	0.983723	15.9306	16.2387	10.573	6.65825	14.5384	22.318	33.6823	14.0926
ENSG00000133624	ZNF767P	16.4063	0.783417	0.476921	1.64266	0.100454	0.983723	7.96532	16.8632	9.39821	13.3165	24.7152	24.6673	6.96876	27.3562
ENSG00000106591	MRPL32	203.752	0.472872	0.287891	1.64254	0.100478	0.983723	164.086	173.004	158.595	185.48	175.914	224.355	384.443	164.137
ENSG00000136930	PSMB7	1009.09	0.459499	0.27982	1.64212	0.100565	0.983723	820.428	909.365	872.858	795.185	970.436	850.435	1945.45	908.556
ENSG00000035664	DAPK2	1.15459	-2.80839	1.71028	-1.64207	0.100576	0.983723	3.18613	0.624564	4.6991	0	0.726918	0	0	0
ENSG00000175322	ZNF519	2.06009	-1.91579	1.16676	-1.64197	0.100596	0.983723	1.59306	1.87369	7.04866	2.85354	1.45384	0	0	1.65795
ENSG00000135914	HTR2B	1.34503	2.28242	1.39013	1.64188	0.100615	0.983723	0	0.624564	0	0.951178	4.36151	1.17463	1.16146	2.48692
ENSG00000056972	TRAF3IP2	75.275	0.349801	0.213072	1.64171	0.100651	0.983723	57.3503	68.0774	63.4379	74.1919	80.6879	89.2721	92.9168	76.2657
ENSG00000186416	NKRF	11.0333	-0.768266	0.467973	-1.64169	0.100654	0.983723	11.1514	15.6141	10.573	18.0724	10.1769	10.5717	4.64584	7.46077
ENSG00000260196	AC124798.1	5.38125	-1.13453	0.691086	-1.64166	0.10066	0.983723	12.7445	5.62107	5.87388	5.70707	1.45384	3.5239	2.32292	5.80282
ENSG00000124659	TBCC	157.381	0.434058	0.264461	1.64129	0.100737	0.983723	129.038	159.264	116.303	129.36	165.01	136.257	272.943	150.873
ENSG00000165775	FUNDC2	220.151	0.459619	0.280168	1.64051	0.100899	0.983723	175.237	209.229	158.595	196.894	219.529	190.291	409.995	201.441
ENSG00000175416	CLTB	512.183	0.47736	0.29102	1.6403	0.100943	0.983723	377.556	495.279	432.318	406.153	527.016	413.471	993.048	452.62
ENSG00000173486	FKBP2	242.554	0.528175	0.32225	1.63902	0.101209	0.983723	173.644	206.731	205.586	207.357	230.433	202.037	515.688	198.954
ENSG00000256745	AP002784.2	2.96615	1.45563	0.888204	1.63885	0.101245	0.983723	1.59306	2.49825	0	1.90236	5.08843	3.5239	5.8073	3.3159
ENSG00000235720	GABPAP	1.13748	2.72087	1.66025	1.63883	0.101249	0.983723	0	0.624564	0	0	1.45384	4.69853	2.32292	0
ENSG00000128708	HAT1	316.503	0.413506	0.252321	1.63881	0.101253	0.983723	283.565	297.917	265.499	237.795	311.121	305.405	550.532	280.193
ENSG00000144736	SHQ1	148.911	-0.294041	0.179425	-1.6388	0.101256	0.983723	187.982	151.144	153.896	165.505	146.837	126.86	123.115	135.952
ENSG00000135655	USP15	330.692	-0.285657	0.174368	-1.63824	0.101372	0.983723	414.197	307.285	346.559	386.178	279.137	338.294	301.98	271.904
ENSG00000090013	BLVRB	395.69	0.523932	0.319847	1.63807	0.101407	0.983723	294.717	383.482	287.82	331.01	409.255	299.532	822.314	337.393
ENSG00000056736	IL17RB	3.66936	-1.39376	0.850882	-1.63802	0.101418	0.983723	6.37225	1.87369	8.22343	4.75589	1.45384	3.5239	2.32292	0.828975
ENSG00000132763	MMACHC	11.7382	0.697912	0.426204	1.63751	0.101525	0.983723	7.96532	8.74389	9.39821	9.51178	13.8114	16.4449	13.9375	14.0926
ENSG00000271576	AL359504.2	5.02948	1.29087	0.788329	1.63748	0.101531	0.983723	0	2.49825	7.04866	1.90236	7.9961	4.69853	12.7761	3.3159
ENSG00000089009	RPL6	379.851	0.458607	0.280085	1.63739	0.10155	0.983723	323.392	352.254	300.743	302.475	379.451	320.675	722.428	337.393
ENSG00000225177	AL590617.2	25.1295	0.700198	0.427647	1.63733	0.101562	0.983723	19.1168	14.9895	22.3207	19.9747	20.3537	23.4927	59.2345	21.5533
ENSG00000198799	LRIG2	39.0634	-0.647783	0.39569	-1.6371	0.10161	0.983723	65.3156	39.3475	43.4667	43.7542	31.2575	41.1122	9.29168	38.9618
ENSG00000273472	AC096733.2	1.98542	-1.87069	1.14272	-1.63705	0.10162	0.983723	1.59306	3.74738	3.52433	3.80471	0.726918	0	0	2.48692
ENSG00000162636	FAM102B	30.2815	-0.732728	0.447603	-1.63701	0.101629	0.983723	31.8613	28.1054	41.1172	50.4125	18.8999	32.8897	5.8073	33.159
ENSG00000169946	ZFPM2	33.9497	-0.512445	0.313133	-1.63651	0.101733	0.983723	43.0127	39.9721	36.4181	40.9007	24.7152	29.3658	17.4219	39.7908
ENSG00000104219	ZDHHC2	78.7533	-0.427049	0.261054	-1.63586	0.101868	0.983723	79.6532	68.702	110.429	102.727	57.4265	82.2243	53.4272	75.4367
ENSG00000100271	TTLL1	90.706	0.482284	0.29491	1.63536	0.101974	0.983723	73.2809	73.6985	74.0109	80.8502	94.4994	89.2721	169.573	70.4628
ENSG00000130312	MRPL34	145.361	0.604187	0.3695	1.63515	0.102018	0.983723	114.701	139.902	101.031	104.63	131.572	120.987	341.469	108.596
ENSG00000210077	MT-TV	2.70258	1.63625	1.00078	1.63498	0.102054	0.983723	0	1.87369	0	2.85354	5.08843	2.34927	6.96876	2.48692
ENSG00000228474	OST4	518.813	0.50565	0.309291	1.63487	0.102076	0.983723	372.777	499.651	421.745	419.47	508.116	420.519	1063.9	444.33
ENSG00000101945	SUV39H1	16.2267	0.709185	0.433874	1.63454	0.102145	0.983723	9.55838	14.365	11.7478	13.3165	23.9883	24.6673	8.13022	24.0403
ENSG00000270170	NCBP2-AS2	153.93	0.482435	0.295211	1.63421	0.102215	0.983723	105.142	150.52	115.128	140.774	149.018	149.178	291.526	130.149
ENSG00000173376	NDNF	1.80719	-2.54313	1.55651	-1.63386	0.102288	0.983723	4.77919	0	3.52433	3.80471	0	2.34927	0	0
ENSG00000163104	SMARCAD1	130.466	-0.370568	0.226809	-1.63383	0.102294	0.983723	140.19	121.79	175.042	153.14	124.303	118.638	81.3022	129.32
ENSG00000183647	ZNF530	9.60451	-0.953493	0.583783	-1.6333	0.102406	0.983723	11.1514	12.4913	18.7964	7.60943	1.45384	10.5717	8.13022	6.6318
ENSG00000103121	CMC2	104.969	0.729065	0.446393	1.63324	0.102419	0.983723	49.385	109.299	83.4091	72.2896	86.5033	65.7795	281.073	92.0162
ENSG00000155980	KIF5A	1.08581	-2.71874	1.66488	-1.63299	0.102471	0.983723	3.18613	1.24913	3.52433	0	0.726918	0	0	0
ENSG00000070010	UFD1	430.25	0.479101	0.293476	1.63251	0.102573	0.983723	342.509	415.335	372.404	306.279	410.709	373.533	843.22	378.012
ENSG00000084207	GSTP1	2727.24	0.463402	0.283861	1.6325	0.102575	0.983723	2078.95	2526.36	2286.11	2279.02	2663.43	2183.64	5286.97	2513.45
ENSG00000135373	EHF	3.47415	-1.68091	1.02977	-1.63232	0.102612	0.983723	7.96532	6.24564	7.04866	0	2.18075	3.5239	0	0.828975
ENSG00000135211	TMEM60	159.346	0.519974	0.31855	1.63232	0.102613	0.983723	129.038	150.52	133.924	109.386	164.284	120.987	324.047	142.584
ENSG00000142669	SH3BGRL3	3168.45	0.460648	0.282248	1.63207	0.102665	0.983723	2528.19	2906.09	2625.62	2606.23	3023.98	2686.39	6170.84	2800.28
ENSG00000187049	TMEM216	49.1055	0.517663	0.317222	1.63186	0.102709	0.983723	30.2682	38.0984	49.3406	42.803	40.7074	46.9853	88.271	56.3703
ENSG00000154864	PIEZO2	153.744	-0.477473	0.292726	-1.63113	0.102863	0.983723	216.657	132.408	197.362	171.212	143.93	160.925	67.3647	140.097
ENSG00000101473	ACOT8	156.49	0.49288	0.302234	1.63079	0.102934	0.983723	133.817	122.414	123.351	139.823	146.837	139.781	312.433	133.465
ENSG00000112144	ICK	58.8361	-0.61257	0.375702	-1.63047	0.103003	0.983723	79.6532	50.5897	63.4379	91.3131	42.8882	72.8273	18.5834	51.3964
ENSG00000130244	FAM98C	56.2092	0.428704	0.26297	1.63024	0.103051	0.983723	44.6058	56.2107	41.1172	48.5101	65.4226	49.3346	84.7866	59.6862
ENSG00000047249	ATP6V1H	554.259	0.370289	0.227283	1.6292	0.103271	0.983723	444.465	506.521	503.979	477.492	559.727	530.934	909.423	501.53
ENSG00000116514	RNF19B	54.6895	-0.416478	0.255785	-1.62824	0.103474	0.983723	63.7225	61.8318	66.9622	58.0219	47.9766	58.7317	31.3594	48.9095
ENSG00000203760	CENPW	11.6352	0.998562	0.613496	1.62766	0.103597	0.983723	6.37225	10.6176	4.6991	8.56061	10.1769	5.87317	36.0053	10.7767
ENSG00000103202	NME4	714.829	0.45081	0.27701	1.62741	0.10365	0.983723	543.235	728.866	579.164	563.098	698.568	597.888	1332.19	675.614
ENSG00000235109	ZSCAN31	19.3011	0.603398	0.370801	1.62728	0.103677	0.983723	20.7098	10.6176	12.9225	18.0724	23.9883	22.318	26.7136	19.0664
ENSG00000171940	ZNF217	22.4672	-0.591299	0.363455	-1.62688	0.103762	0.983723	28.6751	25.6071	22.3207	32.3401	23.9883	17.6195	9.29168	19.8954
ENSG00000061987	MON2	197.863	-0.821327	0.504922	-1.62664	0.103813	0.983723	280.379	182.373	323.063	225.429	112.672	239.625	22.0677	197.296
ENSG00000138468	SENP7	17.4036	-0.714825	0.439478	-1.62653	0.103837	0.983723	23.896	23.1089	27.0198	12.3653	6.54226	16.4449	11.6146	18.2374
ENSG00000255561	FDXACB1	10.5515	-0.817916	0.502868	-1.6265	0.103843	0.983723	7.96532	9.99302	22.3207	13.3165	5.81535	10.5717	6.96876	7.46077
ENSG00000146416	AIG1	172.837	0.467464	0.287453	1.62622	0.103902	0.983723	117.887	148.646	135.099	176.919	175.914	162.099	319.402	146.729
ENSG00000114956	DGUOK	250.29	0.518585	0.318928	1.62602	0.103945	0.983723	168.865	229.839	223.207	199.747	222.437	196.164	519.173	242.89
ENSG00000182809	CRIP2	1254.84	0.46238	0.284421	1.62569	0.104015	0.983723	895.302	1256	1104.29	964.495	1282.28	1011.36	2369.38	1155.59
ENSG00000135940	COX5B	694.269	0.53924	0.331789	1.62525	0.104109	0.983723	476.326	658.915	549.795	577.365	652.046	560.3	1515.71	563.703
ENSG00000238072	AC009244.1	3.76791	1.33464	0.821314	1.625	0.104162	0.983723	0	1.87369	2.34955	3.80471	3.63459	5.87317	9.29168	3.3159
ENSG00000064205	WISP2	1.93565	2.02803	1.24807	1.62493	0.104177	0.983723	1.59306	0.624564	1.17478	0	3.63459	0	3.48438	4.97385
ENSG00000145494	NDUFS6	250.854	0.582073	0.358226	1.62487	0.104189	0.983723	152.934	234.211	222.033	193.089	256.602	180.894	565.631	201.441
ENSG00000138400	MDH1B	7.31661	0.936078	0.576373	1.62408	0.104358	0.983723	3.18613	3.74738	9.39821	3.80471	8.72302	12.921	9.29168	7.46077
ENSG00000124562	SNRPC	607.448	0.546939	0.336805	1.62391	0.104396	0.983723	417.383	577.721	491.056	487.003	582.261	448.71	1335.68	519.767
ENSG00000197020	ZNF100	8.66545	-1.24472	0.766541	-1.62382	0.104415	0.983723	19.1168	2.49825	7.04866	20.9259	10.9038	3.5239	1.16146	4.14487
ENSG00000187189	TSPYL4	24.7775	-0.556421	0.342806	-1.62314	0.10456	0.983723	35.0474	26.2317	34.0685	23.7795	23.2614	23.4927	11.6146	20.7244
ENSG00000266777	SH3GL1P1	0.689795	-2.92791	1.80435	-1.62269	0.104655	0.983723	1.59306	0.624564	2.34955	0.951178	0	0	0	0
ENSG00000172845	SP3	183.709	-0.519403	0.32014	-1.62243	0.104712	0.983723	224.622	181.748	230.256	229.234	143.93	241.974	72.0105	145.9
ENSG00000124615	MOCS1	97.3131	-0.462622	0.285173	-1.62225	0.104749	0.983723	68.5017	133.032	145.672	103.678	99.5878	70.478	63.8803	93.6741
ENSG00000196458	ZNF605	45.1049	-0.685043	0.422499	-1.62141	0.10493	0.983723	58.9434	41.8458	76.3604	46.6077	39.9805	36.4136	9.29168	51.3964
ENSG00000115525	ST3GAL5	83.0421	0.513631	0.316906	1.62077	0.105067	0.983723	39.8266	76.1968	98.6812	57.0707	77.0533	131.559	106.854	77.0946
ENSG00000244005	NFS1	119.258	0.374163	0.230976	1.61992	0.10525	0.983723	93.9908	126.162	122.177	72.2896	138.114	124.511	141.698	135.123
ENSG00000261490	AC005674.2	4.20843	-1.2027	0.742716	-1.61933	0.105376	0.983723	6.37225	5.62107	5.87388	5.70707	2.90767	4.69853	0	2.48692
ENSG00000174738	NR1D2	119.539	-0.522671	0.322949	-1.61843	0.105569	0.983723	180.016	108.05	108.079	168.359	98.8609	148.004	54.5886	90.3582
ENSG00000156384	SFR1	44.2379	0.766331	0.473539	1.61831	0.105597	0.983723	31.8613	38.723	32.8937	26.633	31.2575	51.6839	118.469	22.3823
ENSG00000112773	FAM46A	99.9634	0.390686	0.241471	1.61794	0.105676	0.983723	106.735	66.8283	91.6325	82.7525	88.684	130.384	103.37	129.32
ENSG00000131669	NINJ1	322.718	0.337052	0.208322	1.61793	0.105677	0.983723	246.925	324.149	304.267	263.476	351.101	293.658	471.553	326.616
ENSG00000109674	NEIL3	5.56586	-1.13703	0.702901	-1.61762	0.105745	0.983723	4.77919	13.1158	9.39821	2.85354	2.90767	2.34927	5.8073	3.3159
ENSG00000170634	ACYP2	89.194	0.508586	0.314407	1.61761	0.105747	0.983723	70.0948	71.2003	81.0595	71.3384	83.5956	88.0975	177.703	70.4628
ENSG00000114302	PRKAR2A	101.483	-0.312968	0.193507	-1.61735	0.105804	0.983723	113.108	101.179	109.254	126.507	84.3225	86.9229	95.2397	95.3321
ENSG00000160305	DIP2A	86.3581	-0.611164	0.377916	-1.6172	0.105836	0.983723	106.735	83.6915	133.924	94.1667	70.5111	86.9229	22.0677	92.8452
ENSG00000123349	PFDN5	726.073	0.507242	0.313685	1.61704	0.10587	0.983723	592.62	653.294	560.368	591.633	724.011	562.649	1518.03	605.98
ENSG00000233308	OSTN-AS1	35.0001	0.895825	0.554088	1.61676	0.105931	0.983723	15.9306	26.8562	24.6703	29.4865	26.896	18.7941	114.985	22.3823
ENSG00000071082	RPL31	679.911	0.517938	0.320382	1.61663	0.105959	0.983723	482.698	620.816	563.892	567.854	643.323	502.743	1437.89	620.073
ENSG00000114790	ARHGEF26	16.998	-0.68552	0.424164	-1.61617	0.106058	0.983723	17.5237	28.1054	22.3207	15.2189	15.2653	19.9688	9.29168	8.28975
ENSG00000231500	RPS18	1365.09	0.499063	0.308849	1.61588	0.10612	0.983723	955.838	1257.87	1227.64	1082.44	1354.25	1098.28	2797.96	1146.47
ENSG00000114391	RPL24	326.647	0.486349	0.300996	1.6158	0.106138	0.983723	208.691	321.65	277.247	278.695	296.583	286.611	641.126	302.576
ENSG00000248049	UBA6-AS1	54.2969	-0.395936	0.245044	-1.61577	0.106143	0.983723	52.5711	63.0809	59.9136	70.3872	51.6112	55.2078	41.8126	39.7908
ENSG00000234420	ZNF37BP	12.1367	-0.825171	0.510707	-1.61574	0.10615	0.983723	20.7098	13.7404	18.7964	9.51178	11.6307	12.921	2.32292	7.46077
ENSG00000073711	PPP2R3A	75.4132	-0.575996	0.356503	-1.61568	0.106163	0.983723	127.445	51.8388	90.4577	93.2155	59.6073	69.3034	30.198	81.2395
ENSG00000131143	COX4I1	1286.93	0.493445	0.305495	1.61523	0.106261	0.983723	920.791	1223.52	1080.79	1049.15	1229.95	1044.25	2629.55	1117.46
ENSG00000147383	NSDHL	441.333	0.446174	0.276246	1.61514	0.106281	0.983723	328.171	400.97	365.355	398.544	456.505	357.089	821.152	402.882
ENSG00000072121	ZFYVE26	42.7494	-0.905283	0.560742	-1.61444	0.106432	0.983723	81.2462	39.9721	63.4379	38.9983	25.4421	45.8107	2.32292	44.7646
ENSG00000260273	AL359711.2	1.6522	1.97768	1.22547	1.61381	0.106568	0.983723	0	1.24913	1.17478	0	3.63459	2.34927	2.32292	2.48692
ENSG00000171222	SCAND1	219.586	0.546485	0.338806	1.61297	0.10675	0.983723	159.306	209.229	159.77	184.529	255.148	138.607	455.292	194.809
ENSG00000158234	FAIM	63.2988	0.44607	0.276576	1.61283	0.106782	0.983723	60.5364	46.8423	52.8649	54.2172	68.3303	71.6526	102.208	49.7385
ENSG00000272523	LINC01023	2.30477	1.80852	1.12158	1.61247	0.106859	0.983723	1.59306	0.624564	0	1.90236	2.18075	2.34927	8.13022	1.65795
ENSG00000085117	CD82	127.862	0.515122	0.319494	1.61231	0.106895	0.983723	74.874	129.909	111.604	102.727	121.395	102.193	250.875	129.32
ENSG00000104368	PLAT	5151.03	0.393573	0.244164	1.61192	0.106979	0.983723	4151.52	4930.31	4810.71	3916.95	5755.01	5474.97	8332.32	3836.49
ENSG00000144713	RPL32	472.315	0.521143	0.323415	1.61137	0.107098	0.983723	291.531	484.037	390.026	384.276	520.473	339.469	950.074	418.632
ENSG00000272894	AC004982.2	2.37737	-1.95886	1.21597	-1.61095	0.107192	0.983723	9.55838	2.49825	2.34955	0.951178	0	1.17463	0	2.48692
ENSG00000164830	OXR1	182.448	-0.362806	0.225246	-1.61071	0.107243	0.983723	197.54	166.759	218.508	237.795	145.384	214.958	139.375	139.268
ENSG00000109083	IFT20	105.282	0.445887	0.276832	1.61068	0.10725	0.983723	92.3977	88.688	78.71	96.069	98.8609	90.4468	189.318	107.767
ENSG00000077254	USP33	212.248	-0.460924	0.286206	-1.61046	0.107297	0.983723	317.02	204.232	237.305	226.38	172.28	238.451	97.5627	204.757
ENSG00000168010	ATG16L2	11.738	-0.985709	0.612077	-1.61043	0.107303	0.983723	28.6751	13.7404	14.0973	6.65825	3.63459	5.87317	4.64584	16.5795
ENSG00000213963	AC019080.1	3.76822	-1.21572	0.754956	-1.61031	0.107329	0.983723	4.77919	5.62107	7.04866	3.80471	2.90767	1.17463	2.32292	2.48692
ENSG00000204054	LINC00963	105.067	0.402582	0.250017	1.61022	0.10735	0.983723	87.6185	98.0565	91.6325	83.7037	121.395	101.018	168.412	88.7003
ENSG00000185386	MAPK11	3.1642	1.45054	0.900996	1.60993	0.107413	0.983723	0	1.24913	2.34955	2.85354	4.36151	5.87317	6.96876	1.65795
ENSG00000168894	RNF181	419.008	0.558161	0.346743	1.60973	0.107458	0.983723	318.613	376.612	311.316	348.131	391.809	300.706	950.074	354.801
ENSG00000244300	GATA2-AS1	3.23384	1.91497	1.1904	1.60867	0.107688	0.983723	1.59306	0	1.17478	2.85354	5.81535	0	12.7761	1.65795
ENSG00000061656	SPAG4	17.2697	0.666952	0.414608	1.60863	0.107697	0.983723	12.7445	13.7404	12.9225	13.3165	18.173	21.1434	33.6823	12.4346
ENSG00000276600	RAB7B	15.2509	-0.757267	0.470808	-1.60844	0.107739	0.983723	27.0821	15.6141	21.146	14.2677	15.2653	9.39707	3.48438	15.7505
ENSG00000184497	TMEM255B	57.4801	0.444608	0.276484	1.60808	0.107817	0.983723	46.1988	58.0844	45.8163	42.803	51.6112	74.0019	88.271	53.0544
ENSG00000219507	FTH1P8	18.1788	0.72403	0.45044	1.60738	0.10797	0.983723	12.7445	17.4878	15.2721	8.56061	18.173	17.6195	40.6511	14.9215
ENSG00000198598	MMP17	14.2786	-0.644189	0.400832	-1.60713	0.108026	0.983723	12.7445	16.8632	21.146	19.0236	13.8114	10.5717	9.29168	10.7767
ENSG00000105404	RABAC1	1234.99	0.457222	0.284619	1.60644	0.108178	0.983723	911.232	1154.19	1121.91	974.958	1256.84	977.295	2357.76	1125.75
ENSG00000150977	RILPL2	139.89	0.358411	0.223134	1.60626	0.108217	0.983723	117.887	135.53	116.303	118.897	127.938	142.131	213.709	146.729
ENSG00000106546	AHR	150.37	-0.635405	0.395665	-1.60592	0.108292	0.983723	224.622	120.541	166.818	220.673	114.853	176.195	38.3282	140.926
ENSG00000215114	UBXN2B	81.819	-0.362017	0.225475	-1.60558	0.108367	0.983723	106.735	80.5687	85.7586	97.0202	71.238	66.9541	59.2345	87.0423
ENSG00000129235	TXNDC17	426.519	0.556259	0.346599	1.60491	0.108514	0.983723	301.089	397.223	321.889	359.545	415.797	334.771	959.366	322.471
ENSG00000132323	ILKAP	98.6973	0.391643	0.244104	1.60441	0.108623	0.983723	82.8393	87.4389	102.205	68.4849	84.3225	104.542	142.86	116.885
ENSG00000184990	SIVA1	240.421	0.525204	0.327413	1.6041	0.108691	0.983723	162.492	221.096	211.46	192.138	226.798	175.02	506.397	227.968
ENSG00000130724	CHMP2A	516.571	0.490893	0.306142	1.60348	0.108829	0.983723	390.301	463.426	427.618	435.64	525.562	372.359	1041.83	475.831
ENSG00000161395	PGAP3	72.1539	0.436108	0.272012	1.60327	0.108875	0.983723	52.5711	70.5757	69.3118	52.3148	97.407	103.368	54.5886	77.0946
ENSG00000060339	CCAR1	425.87	0.261507	0.163128	1.60308	0.108917	0.983723	372.777	418.458	361.831	394.739	469.589	411.122	548.209	430.238
ENSG00000168310	IRF2	62.337	0.439131	0.273933	1.60306	0.108922	0.983723	30.2682	64.3301	61.0883	53.266	62.515	85.7482	74.3334	67.1469
ENSG00000162302	RPS6KA4	35.024	-0.588538	0.367226	-1.60266	0.10901	0.983723	43.0127	41.2212	46.991	38.0471	33.4382	31.7151	9.29168	36.4749
ENSG00000148950	IMMP1L	28.2123	0.632312	0.394668	1.60214	0.109125	0.983723	20.7098	20.6106	21.146	25.6818	35.619	21.1434	59.2345	21.5533
ENSG00000115760	BIRC6	116.132	-0.524196	0.327215	-1.60199	0.109158	0.983723	167.272	111.797	115.128	155.042	96.6801	118.638	41.8126	122.688
ENSG00000109475	RPL34	596.849	0.499173	0.311646	1.60173	0.109216	0.983723	425.348	529.005	480.483	542.172	564.815	463.98	1233.47	535.518
ENSG00000104998	IL27RA	40.8684	-0.460727	0.287719	-1.60131	0.109308	0.983723	58.9434	52.4634	45.8163	32.3401	35.619	36.4136	37.1667	28.1851
ENSG00000123091	RNF11	507.941	-0.36807	0.22986	-1.60128	0.109314	0.983723	726.437	456.556	541.572	566.902	446.328	563.824	321.724	440.186
ENSG00000060237	WNK1	80.7187	-0.37242	0.232735	-1.60019	0.109556	0.983723	97.1769	89.3126	74.0109	104.63	75.5995	74.0019	52.2657	78.7526
ENSG00000132196	HSD17B7	85.7949	0.506715	0.316732	1.59983	0.109637	0.983723	82.8393	66.8283	62.2631	71.3384	82.1418	83.399	169.573	67.9759
ENSG00000229809	ZNF688	36.2245	0.607143	0.379507	1.59982	0.109639	0.983723	25.489	37.4738	35.2433	16.17	43.6151	23.4927	62.7188	45.5936
ENSG00000181991	MRPS11	88.0118	0.521043	0.32572	1.59967	0.109672	0.983723	58.9434	81.8178	88.1082	58.9731	81.4148	79.8751	175.38	79.5816
ENSG00000112679	DUSP22	114.848	0.299104	0.186983	1.59963	0.109681	0.983723	89.2116	111.172	115.128	95.1178	127.211	125.686	130.084	125.175
ENSG00000138678	GPAT3	11.8331	0.833528	0.521088	1.59959	0.109689	0.983723	9.55838	12.4913	4.6991	6.65825	10.9038	8.22243	25.5521	16.5795
ENSG00000178860	MSC	208.046	0.368494	0.230381	1.5995	0.10971	0.983723	156.12	211.727	177.391	178.822	194.087	198.513	326.37	221.336
ENSG00000263465	SRSF8	218.881	0.288613	0.180475	1.59919	0.109779	0.983723	162.492	204.232	200.887	217.82	210.806	240.8	275.266	238.745
ENSG00000237928	NFIA-AS2	2.92908	-1.60449	1.00369	-1.59859	0.109912	0.983723	3.18613	4.37195	1.17478	8.56061	1.45384	3.5239	1.16146	0
ENSG00000109390	NDUFC1	326.581	0.551637	0.345122	1.59838	0.109958	0.983723	213.471	299.166	246.703	298.67	311.848	243.149	723.59	276.049
ENSG00000176731	C8orf59	17.608	0.662055	0.414268	1.59813	0.110013	0.983723	6.37225	14.9895	12.9225	19.0236	23.9883	17.6195	30.198	15.7505
ENSG00000111058	ACSS3	2.02025	1.80584	1.13015	1.59787	0.110072	0.983723	1.59306	1.87369	0	0	4.36151	3.5239	2.32292	2.48692
ENSG00000213442	RPL18AP3	33.4519	0.561469	0.351524	1.59724	0.110211	0.983723	14.3376	28.7299	35.2433	28.5354	38.5267	28.1912	59.2345	34.8169
ENSG00000102871	TRADD	127.671	0.334152	0.209218	1.59715	0.110233	0.983723	119.48	111.797	126.876	94.1667	152.653	135.083	166.089	115.227
ENSG00000213430	HSPD1P1	1.0169	-2.6458	1.65721	-1.59654	0.110369	0.983723	0	2.49825	3.52433	0.951178	0	0	1.16146	0
ENSG00000133134	BEX2	3.7862	1.43401	0.898833	1.59541	0.11062	0.983723	1.59306	1.24913	2.34955	2.85354	1.45384	4.69853	12.7761	3.3159
ENSG00000173276	ZBTB21	41.533	-0.669404	0.41976	-1.59473	0.110773	0.983723	52.5711	33.1019	55.2145	63.729	42.1613	49.3346	10.4531	25.6982
ENSG00000111801	BTN3A3	59.9719	-0.505727	0.317126	-1.59472	0.110775	0.983723	52.5711	77.4459	83.4091	68.4849	75.5995	30.5405	51.1042	40.6198
ENSG00000197956	S100A6	2781.14	0.476852	0.299142	1.59407	0.110921	0.983723	2027.97	2532.61	2428.26	2312.31	2682.33	2275.26	5608.69	2381.64
ENSG00000155368	DBI	857.345	0.535739	0.336099	1.59399	0.110938	0.983723	648.377	766.34	680.195	703.872	844.679	601.412	1888.53	725.353
ENSG00000166441	RPL27A	512.374	0.489117	0.306878	1.59385	0.11097	0.983723	363.219	502.774	439.366	398.544	551.731	381.756	1013.95	447.646
ENSG00000283196	AC006453.2	103.461	0.506851	0.318008	1.59383	0.110974	0.983723	70.0948	107.425	84.5839	77.9966	110.492	90.4468	202.094	84.5554
ENSG00000134548	SPX	16.7927	0.686847	0.430999	1.59362	0.111022	0.983723	7.96532	13.1158	16.4469	13.3165	18.173	11.7463	33.6823	19.8954
ENSG00000054148	PHPT1	495.366	0.49823	0.312649	1.59357	0.111031	0.983723	361.625	487.16	390.026	402.349	512.477	375.883	1008.15	425.264
ENSG00000228834	AL445189.2	0.661845	-2.88542	1.81082	-1.59344	0.111063	0.983723	1.59306	0.624564	1.17478	1.90236	0	0	0	0
ENSG00000260052	AC023813.3	0.661845	-2.88542	1.81082	-1.59344	0.111063	0.983723	1.59306	0.624564	1.17478	1.90236	0	0	0	0
ENSG00000038219	BOD1L1	109.236	0.451158	0.283148	1.59337	0.111078	0.983723	78.0601	108.674	103.38	77.0455	98.134	132.734	184.672	91.1872
ENSG00000149792	MRPL49	306.285	0.233337	0.146487	1.59289	0.111185	0.983723	269.228	283.552	291.344	282.5	356.19	331.247	299.657	336.564
ENSG00000181444	ZNF467	1.46441	2.30624	1.44816	1.59253	0.111265	0.983723	0	0.624564	1.17478	0	2.90767	3.5239	3.48438	0
ENSG00000184786	TCTE3	4.42504	1.44063	0.904794	1.59222	0.111335	0.983723	1.59306	1.87369	1.17478	4.75589	2.18075	9.39707	1.16146	13.2636
ENSG00000114902	SPCS1	660.216	0.506176	0.317984	1.59183	0.111424	0.983723	540.049	561.483	535.698	544.074	599.708	562.649	1410.01	528.057
ENSG00000103264	FBXO31	97.3581	-0.394793	0.248129	-1.59108	0.111592	0.983723	113.108	107.425	99.8559	123.653	103.949	72.8273	56.9115	101.135
ENSG00000120051	CFAP58	5.91739	-1.08458	0.681778	-1.59082	0.111651	0.983723	4.77919	8.11933	15.2721	3.80471	4.36151	4.69853	4.64584	1.65795
ENSG00000204516	MICB	132.407	0.291934	0.183587	1.59017	0.111797	0.983723	113.108	139.278	112.778	109.386	149.018	140.956	152.151	142.584
ENSG00000110925	CSRNP2	102.272	-0.642142	0.403923	-1.58976	0.111888	0.983723	130.631	72.4494	152.721	144.579	103.949	64.6048	29.0365	120.201
ENSG00000026103	FAS	290.181	0.306587	0.19288	1.58952	0.111943	0.983723	280.379	241.082	270.198	246.355	279.137	298.357	415.803	290.141
ENSG00000131080	EDA2R	229.637	-0.393178	0.247375	-1.5894	0.111971	0.983723	285.158	206.106	290.17	262.525	199.903	270.166	132.406	190.664
ENSG00000213799	ZNF845	51.3966	-0.531036	0.334182	-1.58906	0.112047	0.983723	39.8266	44.344	86.9334	72.2896	44.342	46.9853	26.7136	49.7385
ENSG00000153406	NMRAL1	136.827	0.495163	0.311762	1.58827	0.112225	0.983723	97.1769	159.264	95.1568	100.825	151.199	101.018	247.391	142.584
ENSG00000219928	AL161787.1	1.13254	2.71975	1.71254	1.58814	0.112255	0.983723	0	0.624564	0	0	1.45384	1.17463	5.8073	0
ENSG00000166669	ATF7IP2	15.1467	0.859545	0.54125	1.58807	0.11227	0.983723	14.3376	8.74389	17.6216	2.85354	14.5384	32.8897	18.5834	11.6056
ENSG00000154719	MRPL39	173.383	0.417421	0.262866	1.58796	0.112295	0.983723	108.328	182.373	160.944	139.823	190.453	160.925	283.396	160.821
ENSG00000197728	RPS26	349.33	0.480619	0.302716	1.58769	0.112356	0.983723	235.773	322.899	323.063	283.451	346.013	276.039	689.907	317.497
ENSG00000105171	POP4	266.325	0.473902	0.298512	1.58755	0.112388	0.983723	213.471	233.587	222.033	221.625	259.51	245.498	528.464	206.415
ENSG00000225302		3.13965	-1.94349	1.22424	-1.58751	0.112398	0.983723	11.1514	2.49825	0	6.65825	3.63459	1.17463	0	0
ENSG00000102174	PHEX	10.0051	0.820557	0.517051	1.58699	0.112514	0.983723	9.55838	6.8702	5.87388	6.65825	5.81535	12.921	17.4219	14.9215
ENSG00000228701	TNKS2-AS1	2.07987	2.02904	1.27856	1.58698	0.112518	0.983723	1.59306	0	0	1.90236	2.18075	1.17463	8.13022	1.65795
ENSG00000137942	FNBP1L	99.8359	-0.434224	0.273657	-1.58675	0.11257	0.983723	108.328	99.9302	136.274	115.093	72.6918	102.193	52.2657	111.912
ENSG00000116741	RGS2	47.5866	0.690135	0.435127	1.58605	0.112727	0.983723	22.3029	45.5932	52.8649	23.7795	42.1613	35.239	111.5	47.2516
ENSG00000186272	ZNF17	12.4289	-0.747121	0.471171	-1.58567	0.112815	0.983723	14.3376	19.986	17.6216	10.463	9.44994	3.5239	11.6146	12.4346
ENSG00000114383	TUSC2	176.086	0.338825	0.213695	1.58555	0.112841	0.983723	149.748	183.622	138.624	148.384	183.91	156.226	250.875	197.296
ENSG00000228192	AL512353.1	1.39906	2.19862	1.38685	1.58534	0.112889	0.983723	0	0.624564	1.17478	0	0.726918	3.5239	3.48438	1.65795
ENSG00000188643	S100A16	2044.03	0.48253	0.304373	1.58533	0.112892	0.983723	1565.98	1915.54	1668.18	1670.27	1887.08	1703.22	4198.68	1743.33
ENSG00000128626	MRPS12	275.005	0.497381	0.313743	1.58531	0.112895	0.983723	183.202	251.699	261.975	214.015	268.233	209.085	554.016	257.811
ENSG00000153044	CENPH	5.16748	1.26357	0.797136	1.58514	0.112935	0.983723	0	1.87369	1.17478	8.56061	7.26918	5.87317	11.6146	4.97385
ENSG00000221829	FANCG	27.3282	-0.617562	0.389602	-1.58511	0.112942	0.983723	33.4543	26.8562	35.2433	37.096	31.2575	27.0166	18.5834	9.11872
ENSG00000185614	FAM212A	35.6544	0.58747	0.370676	1.58486	0.112998	0.983723	15.9306	29.9791	30.5442	36.1448	37.7997	27.0166	69.6876	38.1328
ENSG00000136874	STX17	38.6324	-0.505021	0.318705	-1.5846	0.113057	0.983723	66.9087	47.4668	35.2433	32.3401	34.1652	32.8897	36.0053	24.0403
ENSG00000197021	CXorf40B	101.813	0.40081	0.252971	1.58441	0.113101	0.983723	84.4324	76.1968	99.8559	90.362	115.58	106.892	159.12	82.0685
ENSG00000147684	NDUFB9	261.972	0.526781	0.332601	1.58382	0.113234	0.983723	173.644	214.225	223.207	246.355	222.437	192.64	556.339	266.93
ENSG00000144426	NBEAL1	51.0557	-0.500769	0.316406	-1.58268	0.113495	0.983723	76.4671	45.5932	48.1658	70.3872	40.7074	50.5092	24.3907	52.2254
ENSG00000111786	SRSF9	296.768	0.474913	0.300152	1.58224	0.113594	0.983723	224.622	309.784	238.479	218.771	278.41	257.245	580.73	266.101
ENSG00000124370	MCEE	61.5684	0.518176	0.32751	1.58217	0.113611	0.983723	58.9434	46.2177	46.991	50.4125	60.3342	49.3346	123.115	57.1993
ENSG00000004838	ZMYND10	2.41664	1.78391	1.12772	1.58188	0.113678	0.983723	1.59306	0.624564	2.34955	0	1.45384	3.5239	8.13022	1.65795
ENSG00000223855	AC147651.1	2.72911	1.70033	1.07527	1.58131	0.113807	0.983723	1.59306	1.24913	2.34955	0	2.18075	2.34927	10.4531	1.65795
ENSG00000101306	MYLK2	1.41435	-2.35257	1.48807	-1.58096	0.113887	0.983723	3.18613	1.87369	4.6991	0	0.726918	0	0	0.828975
ENSG00000142657	PGD	1493.86	0.253901	0.160635	1.5806	0.113969	0.983723	1239.4	1503.32	1285.2	1420.11	1578.14	1474.16	1944.28	1506.25
ENSG00000154359	LONRF1	38.3937	-0.584992	0.370156	-1.58039	0.114018	0.983723	25.489	33.1019	54.0397	71.3384	34.1652	38.7629	22.0677	28.1851
ENSG00000228452	AC098484.1	3.1794	-1.31689	0.833475	-1.58	0.114107	0.983723	3.18613	4.37195	5.87388	4.75589	2.90767	2.34927	1.16146	0.828975
ENSG00000254531	AP001816.1	9.77395	1.10981	0.702593	1.57958	0.114202	0.983723	1.59306	11.8667	9.39821	0.951178	10.1769	7.0478	25.5521	11.6056
ENSG00000147403	RPL10	803.526	0.477141	0.302285	1.57845	0.114462	0.983723	554.386	781.954	647.301	701.97	790.887	622.556	1594.68	734.472
ENSG00000256087	ZNF432	29.7882	-0.694536	0.440012	-1.57845	0.114463	0.983723	38.2335	21.8597	65.7874	21.8771	18.173	34.0644	15.099	23.2113
ENSG00000168944	CEP120	66.8386	-0.645209	0.408778	-1.57839	0.114477	0.983723	90.8046	79.9442	90.4577	65.6313	61.0611	75.1765	12.7761	58.8572
ENSG00000162545	CAMK2N1	26.5234	0.537045	0.340277	1.57826	0.114506	0.983723	19.1168	23.7334	23.4955	19.0236	22.5345	38.7629	40.6511	24.8692
ENSG00000170873	MTSS1	7.35542	0.944035	0.598154	1.57825	0.114509	0.983723	3.18613	6.24564	5.87388	4.75589	13.8114	8.22243	3.48438	13.2636
ENSG00000186787	SPIN2B	18.9071	0.677434	0.429315	1.57794	0.11458	0.983723	12.7445	16.2387	16.4469	12.3653	23.9883	11.7463	39.4896	18.2374
ENSG00000173915	ATP5MD	600.68	0.496311	0.31455	1.57785	0.114601	0.983723	457.209	542.746	495.755	496.515	573.538	468.679	1257.86	513.135
ENSG00000267219	AC010504.1	1.54744	-2.28519	1.44917	-1.5769	0.114819	0.983723	4.77919	1.24913	1.17478	2.85354	0	0	2.32292	0
ENSG00000196417	ZNF765	52.3635	-0.546312	0.346455	-1.57686	0.114827	0.983723	63.7225	49.9651	66.9622	69.436	44.342	37.5883	19.7448	67.1469
ENSG00000125755	SYMPK	34.2036	-0.524334	0.332581	-1.57656	0.114896	0.983723	47.7919	39.3475	35.2433	39.9495	33.4382	35.239	12.7761	29.8431
ENSG00000183648	NDUFB1	169.864	0.508398	0.32254	1.57623	0.114972	0.983723	137.003	159.264	130.4	133.165	161.376	133.908	355.407	148.386
ENSG00000175550	DRAP1	356.479	0.496712	0.315135	1.57619	0.114982	0.983723	253.297	353.503	293.694	280.598	351.101	319.5	728.236	271.904
ENSG00000117472	TSPAN1	22.6194	0.629165	0.399264	1.57581	0.11507	0.983723	19.1168	16.8632	23.4955	11.4141	21.0806	35.239	37.1667	16.5795
ENSG00000171530	TBCA	208.632	0.501394	0.31821	1.57567	0.115102	0.983723	149.748	189.867	173.867	175.968	196.995	184.417	433.225	164.966
ENSG00000143376	SNX27	106.758	-0.35207	0.223461	-1.57553	0.115134	0.983723	124.259	96.8074	112.778	145.53	87.9571	111.59	78.9793	96.1611
ENSG00000175215	CTDSP2	148.585	-0.579816	0.368025	-1.57548	0.115145	0.983723	146.562	164.26	213.809	188.333	146.111	136.257	38.3282	155.018
ENSG00000249210	GAPDHP38	1.06638	2.59556	1.64762	1.57533	0.115179	0.983723	0	0	0	0.951178	2.90767	2.34927	2.32292	0
ENSG00000187514	PTMA	395.33	0.505689	0.321023	1.57524	0.115201	0.983723	280.379	385.356	312.49	327.205	412.163	305.405	818.829	320.813
ENSG00000008988	RPS20	297.485	0.459124	0.291755	1.57366	0.115565	0.983723	221.436	277.306	264.325	237.795	314.756	241.974	570.277	252.008
ENSG00000279118	AC093535.2	2.78984	-1.45154	0.922422	-1.57362	0.115576	0.983723	6.37225	2.49825	4.6991	2.85354	0.726918	2.34927	1.16146	1.65795
ENSG00000140990	NDUFB10	442.877	0.50027	0.317912	1.57361	0.115578	0.983723	323.392	424.079	371.229	347.18	420.159	371.184	926.845	358.946
ENSG00000171848	RRM2	2.48234	-1.71839	1.09227	-1.57323	0.115665	0.983723	0	3.12282	8.22343	3.80471	0.726918	0	2.32292	1.65795
ENSG00000134363	FST	2692.35	0.308805	0.196291	1.5732	0.115672	0.983723	2477.21	2528.86	2373.05	2240.98	2735.39	2669.94	4043.04	2470.34
ENSG00000121741	ZMYM2	171.502	-0.499986	0.317832	-1.57311	0.115693	0.983723	215.064	167.383	210.285	212.113	167.191	183.243	59.2345	157.505
ENSG00000043093	DCUN1D1	228.721	-0.30041	0.191034	-1.57254	0.115825	0.983723	304.275	213.601	213.809	279.646	201.356	222.006	198.61	196.467
ENSG00000054282	SDCCAG8	127.343	0.412468	0.262348	1.57222	0.1159	0.983723	122.666	120.541	112.778	80.8502	129.391	116.289	210.224	126.004
ENSG00000196656	AC004057.1	13.672	0.71916	0.457562	1.57172	0.116015	0.983723	7.96532	9.36846	9.39821	14.2677	18.173	9.39707	26.7136	14.0926
ENSG00000277791	PSMB3	857.431	0.496209	0.315859	1.57098	0.116187	0.983723	622.888	840.663	736.584	643.948	795.248	705.955	1786.33	727.84
ENSG00000142945	KIF2C	2.07269	2.16556	1.37868	1.57075	0.11624	0.983723	0	2.49825	0	0	3.63459	0	4.64584	5.80282
ENSG00000240583	AQP1	11.8607	-0.711567	0.453108	-1.57041	0.116319	0.983723	14.3376	18.1123	15.2721	11.4141	13.0845	9.39707	5.8073	7.46077
ENSG00000147889	CDKN2A	878.933	0.479917	0.305686	1.56997	0.116423	0.983723	624.481	869.393	688.419	752.382	919.552	644.874	1739.87	792.5
ENSG00000198618	PPIAP22	95.2314	0.495017	0.315345	1.56977	0.116469	0.983723	73.2809	83.067	84.5839	74.1919	89.4109	86.9229	191.641	78.7526
ENSG00000101544	ADNP2	35.1019	-0.650587	0.41449	-1.56961	0.116506	0.983723	47.7919	33.7264	39.9424	51.3636	31.2575	24.6673	8.13022	43.9357
ENSG00000123131	PRDX4	1204.94	0.443544	0.282743	1.56872	0.116714	0.983723	978.141	1126.09	998.559	980.665	1209.59	957.326	2308.98	1080.15
ENSG00000167969	ECI1	311.974	0.441391	0.281469	1.56817	0.116842	0.983723	219.843	312.906	274.898	249.209	349.648	241.974	562.147	285.167
ENSG00000172216	CEBPB	91.9917	0.314423	0.200627	1.5672	0.117068	0.983723	73.2809	90.5617	76.3604	85.6061	95.2263	108.066	111.5	95.3321
ENSG00000169020	ATP5ME	53.9527	0.564378	0.36012	1.5672	0.117069	0.983723	31.8613	47.4668	45.8163	47.5589	50.8843	44.6361	116.146	47.2516
ENSG00000198258	UBL5	680.872	0.511819	0.326685	1.56671	0.117183	0.983723	505.001	646.423	568.592	524.099	689.118	512.14	1449.5	552.097
ENSG00000259250	AC018904.1	1.04279	-2.68138	1.71206	-1.56617	0.117308	0.983723	3.18613	0.624564	0	3.80471	0.726918	0	0	0
ENSG00000135631	RAB11FIP5	277.546	-0.463294	0.295952	-1.56544	0.117481	0.983723	294.717	337.264	288.995	366.204	257.329	290.134	108.016	277.707
ENSG00000260766		1.35671	2.19286	1.4014	1.56477	0.117638	0.983723	0	0.624564	0	0.951178	1.45384	2.34927	4.64584	0.828975
ENSG00000104312	RIPK2	161.323	0.322148	0.205909	1.56452	0.117695	0.983723	125.852	144.274	133.924	167.407	147.564	171.496	221.839	178.23
ENSG00000130811	EIF3G	349.452	0.399705	0.25552	1.56428	0.117752	0.983723	264.449	360.373	277.247	301.524	420.159	297.182	573.761	300.918
ENSG00000143543	JTB	584.724	0.435494	0.278445	1.56402	0.117812	0.983723	454.023	553.988	491.056	487.955	570.631	492.171	1105.71	522.254
ENSG00000058063	ATP11B	316.07	-0.492176	0.314694	-1.56399	0.117821	0.983723	444.465	277.306	344.209	412.811	258.056	382.93	127.761	281.022
ENSG00000185634	SHC4	8.02842	1.01292	0.647728	1.56381	0.117863	0.983723	1.59306	7.49476	7.04866	4.75589	10.9038	8.22243	3.48438	20.7244
ENSG00000034510	TMSB10	2970.19	0.467414	0.298946	1.56354	0.117926	0.983723	2219.14	2795.55	2494.05	2462.6	2859.7	2368.06	5965.26	2597.18
ENSG00000246859	STARD4-AS1	10.6399	-0.977614	0.625375	-1.56325	0.117995	0.983723	19.1168	7.49476	9.39821	20.9259	4.36151	9.39707	1.16146	13.2636
ENSG00000151914	DST	498.917	-0.338433	0.216623	-1.56232	0.118214	0.983723	669.087	478.416	566.242	517.441	450.689	493.346	305.464	510.648
ENSG00000255624	AC073585.1	1.01458	2.44739	1.56792	1.56092	0.118544	0.983723	0	0	1.17478	0	1.45384	1.17463	3.48438	0.828975
ENSG00000116731	PRDM2	41.8362	-0.57282	0.367195	-1.55999	0.118763	0.983723	76.4671	43.0949	34.0685	48.5101	39.2536	22.318	22.0677	48.9095
ENSG00000179523	EIF3J-AS1	38.204	0.478546	0.306788	1.55986	0.118793	0.983723	38.2335	36.8493	24.6703	27.5842	47.2497	43.4614	56.9115	30.6721
ENSG00000198517	MAFK	7.40765	-0.904578	0.580139	-1.55924	0.118939	0.983723	4.77919	13.1158	12.9225	7.60943	4.36151	4.69853	3.48438	8.28975
ENSG00000026036	RTEL1-TNFRSF6B	1.70355	-1.94335	1.24698	-1.55844	0.119129	0.983723	1.59306	1.87369	3.52433	3.80471	0	1.17463	0	1.65795
ENSG00000172992	DCAKD	113.162	0.338704	0.217387	1.55807	0.119218	0.983723	87.6185	126.162	84.5839	98.9226	123.576	111.59	145.183	127.662
ENSG00000170035	UBE2E3	322.884	0.303878	0.195077	1.55773	0.119296	0.983723	304.275	302.913	294.869	253.013	318.39	353.565	457.615	298.431
ENSG00000261662	AL359752.1	1.59779	-2.66569	1.71158	-1.55744	0.119365	0.983723	1.59306	0	1.17478	8.56061	1.45384	0	0	0
ENSG00000100097	LGALS1	3786.7	0.464084	0.29805	1.55707	0.119455	0.983723	2920.09	3571.88	3184.82	3053.28	3697.83	2956.55	7575.04	3334.14
ENSG00000168653	NDUFS5	1041.54	0.499287	0.32068	1.55697	0.119478	0.983723	769.45	978.691	835.266	867.475	963.894	822.243	2214.9	880.371
ENSG00000221983	UBA52	557.703	0.517544	0.332413	1.55693	0.119487	0.983723	377.556	529.63	484.008	442.298	543.735	395.851	1192.82	495.727
ENSG00000091527	CDV3	361.824	-0.356627	0.229095	-1.55668	0.119547	0.983723	509.78	342.885	377.103	398.544	350.375	308.929	220.677	386.302
ENSG00000164976	MYORG	14.5303	-0.740629	0.475799	-1.5566	0.119565	0.983723	20.7098	14.365	19.9712	19.0236	16.7191	7.0478	3.48438	14.9215
ENSG00000135063	FAM189A2	9.12838	-0.925719	0.594834	-1.55626	0.119645	0.983723	4.77919	9.36846	21.146	12.3653	7.9961	10.5717	3.48438	3.3159
ENSG00000197958	RPL12	369.773	0.495284	0.318268	1.55619	0.119663	0.983723	251.704	365.994	301.917	306.279	354.736	293.658	763.079	320.813
ENSG00000164687	FABP5	43.0838	0.712997	0.458196	1.5561	0.119685	0.983723	38.2335	28.7299	23.4955	39.9495	46.5228	30.5405	111.5	25.6982
ENSG00000149809	TM7SF2	197.087	0.353122	0.227052	1.55525	0.119887	0.983723	160.899	180.499	192.663	157.896	205.718	155.052	286.881	237.087
ENSG00000099795	NDUFB7	326.258	0.466942	0.300251	1.55518	0.119904	0.983723	243.739	312.282	269.024	269.184	326.386	252.546	643.449	293.457
ENSG00000134899	ERCC5	8.34361	0.914789	0.588452	1.55457	0.120049	0.983723	7.96532	4.99651	8.22343	2.85354	11.6307	5.87317	6.96876	18.2374
ENSG00000182899	RPL35A	635.55	0.504525	0.324618	1.55421	0.120135	0.983723	430.127	601.455	523.95	545.025	618.607	481.6	1341.49	542.149
ENSG00000183684	ALYREF	92.5823	0.37907	0.243949	1.55389	0.12021	0.983723	73.2809	88.0635	75.1857	83.7037	93.7724	90.4468	147.505	88.7003
ENSG00000033011	ALG1	215.524	0.336066	0.216277	1.55387	0.120216	0.983723	186.388	191.741	187.964	195.943	243.518	166.798	308.948	242.89
ENSG00000205534	SMG1P2	3.01685	1.35811	0.874381	1.55323	0.120369	0.983723	3.18613	1.87369	0	1.90236	4.36151	3.5239	3.48438	5.80282
ENSG00000133398	MED10	276.799	0.446401	0.28755	1.55243	0.12056	0.983723	243.739	237.334	238.479	216.869	253.694	270.166	531.949	222.165
ENSG00000168876	ANKRD49	69.6012	0.519538	0.334662	1.55243	0.12056	0.983723	62.1295	44.344	51.6901	70.3872	65.4226	78.7004	133.568	50.5675
ENSG00000010438	PRSS3	36.4365	0.711134	0.458149	1.55219	0.120617	0.983723	22.3029	28.1054	25.8451	33.2912	29.8036	30.5405	97.5627	24.0403
ENSG00000227517	LINC01483	12.8543	0.847812	0.546728	1.5507	0.120973	0.983723	6.37225	11.8667	8.22343	9.51178	18.173	7.0478	32.5209	9.11872
ENSG00000114841	DNAH1	6.41705	-1.0523	0.678788	-1.55027	0.121077	0.983723	12.7445	4.37195	10.573	7.60943	4.36151	5.87317	0	5.80282
ENSG00000205356	TECPR1	45.838	-0.582493	0.375904	-1.54958	0.121243	0.983723	43.0127	40.5966	61.0883	76.0943	47.9766	36.4136	15.099	46.4226
ENSG00000164970	FAM219A	19.6561	-0.592148	0.382208	-1.54928	0.121314	0.983723	36.6405	21.2352	16.4469	20.9259	15.9922	19.9688	12.7761	13.2636
ENSG00000260260	SNHG19	3.27998	1.3598	0.877822	1.54906	0.121367	0.983723	1.59306	3.12282	1.17478	0.951178	2.90767	5.87317	8.13022	2.48692
ENSG00000082512	TRAF5	129.162	-0.457971	0.295706	-1.54874	0.121445	0.983723	138.597	131.783	178.566	150.286	127.211	118.638	52.2657	135.952
ENSG00000166343	MSS51	2.20053	2.40471	1.5529	1.54852	0.121496	0.983723	1.59306	1.24913	0	0	0	0	8.13022	6.6318
ENSG00000277053	GTF2IP1	2.27275	1.59459	1.02983	1.54841	0.121523	0.983723	0	1.87369	2.34955	0	3.63459	3.5239	3.48438	3.3159
ENSG00000167920	TMEM99	80.3082	0.494112	0.319187	1.54803	0.121615	0.983723	58.9434	68.0774	51.6901	86.5572	78.5072	81.0497	152.151	65.489
ENSG00000080947	CROCCP3	4.92692	-1.14516	0.739803	-1.54793	0.121639	0.983723	3.18613	8.74389	4.6991	10.463	2.18075	2.34927	1.16146	6.6318
ENSG00000239213	NCK1-AS1	5.32282	1.14156	0.737492	1.5479	0.121647	0.983723	1.59306	3.74738	3.52433	3.80471	3.63459	5.87317	16.2604	4.14487
ENSG00000142534	RPS11	635.855	0.468445	0.302646	1.54783	0.121662	0.983723	436.499	605.202	548.62	542.172	655.68	480.425	1252.05	566.19
ENSG00000240476	LINC00973	54.4143	0.69598	0.449649	1.54783	0.121664	0.983723	31.8613	36.2247	51.6901	45.6566	47.2497	43.4614	145.183	33.988
ENSG00000004766	VPS50	134.761	-0.301111	0.194554	-1.5477	0.121695	0.983723	180.016	133.657	144.497	138.872	127.211	133.908	108.016	111.912
ENSG00000242262	AC092597.1	2.26433	1.91035	1.23446	1.54752	0.121737	0.983723	0	3.12282	0	0	4.36151	1.17463	6.96876	2.48692
ENSG00000129484	PARP2	133.618	0.31836	0.205729	1.54747	0.12175	0.983723	129.038	118.667	112.778	115.093	122.122	131.559	184.672	155.018
ENSG00000255198	SNHG9	15.9524	0.81455	0.526396	1.54741	0.121765	0.983723	9.55838	11.8667	12.9225	11.4141	16.7191	9.39707	44.1355	11.6056
ENSG00000235449	AC098934.3	1.02049	-2.61017	1.6876	-1.54667	0.121942	0.983723	0	0.624564	3.52433	2.85354	0	0	1.16146	0
ENSG00000125650	PSPN	3.6513	-1.32474	0.856555	-1.54659	0.121962	0.983723	1.59306	6.24564	4.6991	8.56061	3.63459	0	1.16146	3.3159
ENSG00000261136	AC023908.3	1.89073	-2.30339	1.48942	-1.5465	0.121984	0.983723	6.37225	1.87369	4.6991	0	2.18075	0	0	0
ENSG00000101546	RBFA	38.8489	0.441094	0.285381	1.54563	0.122194	0.983723	31.8613	36.2247	30.5442	32.3401	42.8882	36.4136	61.5574	38.9618
ENSG00000083812	ZNF324	35.4365	-0.655866	0.424424	-1.54531	0.122271	0.983723	25.489	34.9756	58.7388	55.1684	41.4343	16.4449	13.9375	37.3039
ENSG00000076344	RGS11	6.12518	-0.985516	0.638071	-1.54452	0.122462	0.983723	6.37225	11.8667	5.87388	7.60943	1.45384	5.87317	5.8073	4.14487
ENSG00000099341	PSMD8	1740.66	0.439318	0.284436	1.54452	0.122463	0.983723	1217.1	1685.07	1483.74	1522.84	1716.98	1431.88	3306.68	1560.96
ENSG00000166922	SCG5	99.4452	0.568344	0.368013	1.54436	0.122502	0.983723	81.2462	82.4424	79.8848	76.0943	82.1418	81.0497	232.292	80.4105
ENSG00000112695	COX7A2	941.617	0.495046	0.320569	1.54427	0.122522	0.983723	751.926	815.68	778.876	779.015	853.402	747.067	2018.62	788.355
ENSG00000096080	MRPS18A	49.6643	0.564997	0.365881	1.54421	0.122538	0.983723	41.4197	44.344	37.5928	36.1448	47.2497	39.9375	109.177	41.4487
ENSG00000238186	AL603839.2	0.621018	-2.80955	1.8198	-1.54388	0.122618	0.983723	1.59306	1.24913	1.17478	0.951178	0	0	0	0
ENSG00000111615	KRR1	53.7773	0.563109	0.364876	1.54329	0.12276	0.983723	43.0127	47.4668	48.1658	34.2424	50.8843	50.5092	116.146	39.7908
ENSG00000188010	MORN2	114.184	0.557067	0.36102	1.54304	0.122822	0.983723	70.0948	100.555	92.8073	104.63	97.407	93.9707	257.844	96.1611
ENSG00000151773	CCDC122	10.1628	0.823287	0.533677	1.54267	0.122911	0.983723	4.77919	5.62107	9.39821	9.51178	15.2653	5.87317	20.9063	9.9477
ENSG00000127445	PIN1	414.936	0.437873	0.283883	1.54244	0.122966	0.983723	312.24	414.086	338.335	343.375	387.447	338.294	782.824	402.882
ENSG00000154001	PPP2R5E	206.895	-0.460118	0.298394	-1.54198	0.123078	0.983723	293.124	184.246	253.752	228.283	168.645	260.769	96.4012	169.94
ENSG00000246451	AL049840.1	3.07036	-1.4013	0.908826	-1.54188	0.123102	0.983723	7.96532	5.62107	2.34955	1.90236	0.726918	2.34927	1.16146	2.48692
ENSG00000149823	VPS51	118.038	-0.339725	0.220385	-1.5415	0.123194	0.983723	114.701	124.288	140.973	148.384	135.207	96.3199	88.271	96.1611
ENSG00000245556	SCAMP1-AS1	25.0712	0.570863	0.370453	1.54098	0.123321	0.983723	19.1168	21.8597	19.9712	19.0236	30.5306	28.1912	45.2969	16.5795
ENSG00000186448	ZNF197	35.3306	-0.562246	0.364952	-1.5406	0.123414	0.983723	39.8266	32.4773	37.5928	58.9731	29.0767	38.7629	12.7761	33.159
ENSG00000169230	PRELID1	211.566	0.482013	0.312933	1.54031	0.123485	0.983723	144.969	222.345	177.391	159.798	215.895	155.052	412.318	204.757
ENSG00000176714	CCDC121	5.08748	1.16694	0.75768	1.54015	0.123523	0.983723	1.59306	3.74738	5.87388	0.951178	2.90767	7.0478	12.7761	5.80282
ENSG00000214941	ZSWIM7	58.087	0.50997	0.331155	1.53997	0.123567	0.983723	43.0127	64.3301	32.8937	49.4613	58.1535	61.0809	106.854	48.9095
ENSG00000060749	QSER1	9.69106	-0.74309	0.48272	-1.53938	0.123711	0.983723	7.96532	12.4913	11.7478	16.17	7.9961	8.22243	4.64584	8.28975
ENSG00000105372	RPS19	1476.14	0.488469	0.317387	1.53903	0.123796	0.983723	1017.97	1483.96	1232.34	1178.51	1488	1058.34	3012.83	1337.14
ENSG00000142227	EMP3	1334.41	0.482859	0.313752	1.53898	0.123808	0.983723	1046.64	1204.16	1143.06	1057.71	1260.48	1026.63	2790.99	1145.64
ENSG00000115685	PPP1R7	663.464	0.465905	0.302743	1.53894	0.123818	0.983723	512.966	625.188	556.844	532.66	641.142	542.681	1339.16	557.071
ENSG00000102007	PLP2	618.259	0.426405	0.277116	1.53873	0.123871	0.983723	473.14	548.992	573.291	513.636	620.788	496.87	1155.65	563.703
ENSG00000096433	ITPR3	109.674	-0.406792	0.264373	-1.53871	0.123876	0.983723	149.748	98.6811	130.4	123.653	100.315	96.3199	58.073	120.201
ENSG00000103018	CYB5B	743.103	0.403478	0.262271	1.5384	0.12395	0.983723	634.039	644.55	662.574	617.315	673.853	667.192	1358.91	686.391
ENSG00000130770	ATP5IF1	696.301	0.47882	0.311326	1.538	0.124049	0.983723	512.966	663.911	583.864	565	652.046	537.982	1432.08	622.56
ENSG00000143554	SLC27A3	8.50307	0.934515	0.607658	1.5379	0.124074	0.983723	0	4.37195	5.87388	12.3653	10.9038	15.2702	9.29168	9.9477
ENSG00000135047	CTSL	1265.08	0.424331	0.27605	1.53715	0.124256	0.983723	1040.27	1144.83	1118.39	1016.81	1202.32	1110.03	2399.58	1088.44
ENSG00000127922	SEM1	395.972	0.467987	0.304458	1.53711	0.124265	0.983723	289.938	373.489	321.889	342.424	392.536	304.23	790.954	352.314
ENSG00000187051	RPS19BP1	250.713	0.491713	0.319915	1.53701	0.12429	0.983723	170.458	255.447	204.411	201.65	287.86	192.64	495.943	197.296
ENSG00000163041	H3F3A	105.121	0.479801	0.312223	1.53673	0.12436	0.983723	71.6879	87.4389	92.8073	97.9714	101.042	89.2721	207.901	92.8452
ENSG00000125449	ARMC7	5.35732	1.00656	0.655019	1.53669	0.12437	0.983723	0	4.99651	4.6991	3.80471	8.72302	5.87317	8.13022	6.6318
ENSG00000198727	MT-CYB	7585.14	0.417588	0.271778	1.53651	0.124414	0.983723	6493.33	6264.37	6886.54	6334.85	6827.94	7065.42	14304.5	6504.14
ENSG00000162437	RAVER2	47.2081	-0.609378	0.396624	-1.53641	0.124437	0.983723	86.0254	44.9686	38.7676	59.9242	35.619	36.4136	16.2604	59.6862
ENSG00000198755	RPL10A	428.42	0.496522	0.323219	1.53618	0.124495	0.983723	313.834	405.342	345.384	355.741	419.432	313.627	900.132	373.868
ENSG00000089248	ERP29	619.771	0.456286	0.297135	1.53562	0.124632	0.983723	454.023	614.571	521.6	498.418	626.603	509.791	1212.56	520.596
ENSG00000128311	TST	106.498	0.461325	0.30047	1.53534	0.124699	0.983723	81.2462	98.0565	93.9821	83.7037	99.5878	110.416	202.094	82.8975
ENSG00000126768	TIMM17B	107.947	0.509906	0.332126	1.53528	0.124715	0.983723	74.874	110.548	95.1568	74.1919	110.492	89.2721	219.516	89.5293
ENSG00000132912	DCTN4	303.125	-0.319673	0.208235	-1.53516	0.124745	0.983723	369.591	289.173	367.705	321.498	275.502	326.548	193.964	281.022
ENSG00000231160	KLF3-AS1	3.08299	1.37861	0.898092	1.53504	0.124773	0.983723	3.18613	1.87369	1.17478	0.951178	7.9961	2.34927	4.64584	2.48692
ENSG00000230457	PA2G4P4	1.34989	-2.17163	1.41481	-1.53493	0.124801	0.983723	3.18613	1.24913	3.52433	0.951178	0.726918	0	1.16146	0
ENSG00000144647	POMGNT2	131.523	-0.350989	0.228728	-1.53453	0.1249	0.983723	165.679	129.285	140.973	155.042	134.48	142.131	85.9481	98.648
ENSG00000152433	ZNF547	24.9803	0.661544	0.431184	1.53425	0.124968	0.983723	20.7098	14.365	28.1946	14.2677	22.5345	35.239	48.7813	15.7505
ENSG00000214900	LINC01588	14.5033	0.796927	0.519559	1.53385	0.125066	0.983723	4.77919	15.6141	12.9225	7.60943	10.1769	19.9688	32.5209	12.4346
ENSG00000108826	MRPL27	275.555	0.571705	0.372856	1.53331	0.125199	0.983723	192.761	251.699	212.634	228.283	263.144	204.386	655.064	196.467
ENSG00000143198	MGST3	1039.8	0.505137	0.329466	1.5332	0.125227	0.983723	865.034	963.077	798.848	810.404	964.62	825.767	2262.52	828.146
ENSG00000251257	AC010457.1	12.6349	0.951721	0.620744	1.53319	0.125228	0.983723	4.77919	15.6141	8.22343	4.75589	19.6268	11.7463	31.3594	4.97385
ENSG00000189223	PAX8-AS1	5.44477	-1.12107	0.73121	-1.53317	0.125234	0.983723	7.96532	3.74738	7.04866	11.4141	5.08843	0	5.8073	2.48692
ENSG00000154898	CCDC144CP	1.42946	-2.20377	1.43824	-1.53227	0.125455	0.983723	4.77919	0.624564	1.17478	2.85354	0	1.17463	0	0.828975
ENSG00000188158	NHS	9.63259	0.90178	0.58861	1.53205	0.12551	0.983723	12.7445	5.62107	5.87388	3.80471	18.173	14.0956	3.48438	13.2636
ENSG00000163293	NIPAL1	3.15541	1.52181	0.993388	1.53194	0.125537	0.983723	1.59306	4.37195	0	0	5.81535	2.34927	6.96876	4.14487
ENSG00000129351	ILF3	199.054	-0.306949	0.200369	-1.53192	0.125542	0.983723	186.388	218.597	266.674	209.259	181.003	182.068	142.86	205.586
ENSG00000159111	MRPL10	174.124	0.357622	0.233462	1.53182	0.125567	0.983723	127.445	178.001	163.294	139.823	199.903	171.496	261.329	151.702
ENSG00000143799	PARP1	251.834	-0.35739	0.233317	-1.53178	0.125577	0.983723	286.751	271.685	299.568	274.891	235.521	239.625	134.729	271.904
ENSG00000118564	FBXL5	514.045	-0.211482	0.138072	-1.53168	0.125601	0.983723	594.213	503.398	538.047	572.609	489.943	488.647	476.199	449.304
ENSG00000099804	CDC34	362.439	0.403859	0.263673	1.53166	0.125606	0.983723	291.531	347.882	312.49	294.865	371.455	306.579	648.095	326.616
ENSG00000141562	NARF	327.538	0.358612	0.234144	1.53159	0.125625	0.983723	270.821	296.668	306.616	272.988	319.117	283.087	537.756	333.248
ENSG00000109065	NAT9	178.702	0.321306	0.20982	1.53134	0.125684	0.983723	192.761	181.748	125.701	135.067	181.73	206.735	221.839	184.032
ENSG00000257337	AC068888.1	3.32382	1.34321	0.877287	1.53109	0.125746	0.983723	3.18613	1.24913	3.52433	0	3.63459	5.87317	5.8073	3.3159
ENSG00000141384	TAF4B	13.9902	-0.735502	0.480473	-1.53079	0.125822	0.983723	12.7445	17.4878	10.573	28.5354	8.72302	16.4449	5.8073	11.6056
ENSG00000235618	FAM21EP	2.68106	-1.51021	0.986559	-1.53079	0.125822	0.983723	0	3.12282	5.87388	6.65825	1.45384	2.34927	1.16146	0.828975
ENSG00000189221	MAOA	16.3694	-0.760781	0.497038	-1.53063	0.125861	0.983723	39.8266	19.986	10.573	13.3165	15.9922	7.0478	9.29168	14.9215
ENSG00000100664	EIF5	866.168	0.260544	0.170222	1.53061	0.125866	0.983723	697.762	832.543	818.819	800.892	829.414	873.927	1164.94	911.043
ENSG00000204272	NBDY	303.761	0.494081	0.322821	1.53051	0.12589	0.983723	202.319	309.159	250.227	245.404	279.864	246.673	629.511	266.93
ENSG00000136002	ARHGEF4	5.46737	-1.05192	0.687335	-1.53043	0.12591	0.983723	3.18613	11.8667	3.52433	10.463	4.36151	4.69853	2.32292	3.3159
ENSG00000103490	PYCARD	7.14429	1.14122	0.745689	1.53042	0.125912	0.983723	0	9.36846	2.34955	4.75589	7.26918	5.87317	20.9063	6.6318
ENSG00000089101	CFAP61	1.46376	-2.31653	1.51369	-1.53038	0.125922	0.983723	6.37225	2.49825	0	0.951178	0.726918	0	1.16146	0
ENSG00000261324	AC010168.2	1.42823	2.31572	1.51373	1.52981	0.126063	0.983723	0	0.624564	0	0.951178	0.726918	0	5.8073	3.3159
ENSG00000158125	XDH	10.4316	-0.865721	0.565971	-1.52962	0.12611	0.983723	22.3029	8.11933	15.2721	8.56061	7.9961	11.7463	6.96876	2.48692
ENSG00000101182	PSMA7	1529.95	0.471751	0.308493	1.52921	0.126212	0.983723	1124.7	1450.24	1307.53	1244.14	1448.75	1187.55	3131.3	1345.43
ENSG00000154640	BTG3	64.9803	0.572926	0.374671	1.52914	0.126229	0.983723	65.3156	46.2177	46.991	50.4125	56.6996	63.4302	145.183	45.5936
ENSG00000116863	ADPRHL2	286.106	0.312241	0.204202	1.52908	0.126245	0.983723	211.877	289.173	253.752	263.476	322.752	304.23	394.896	248.692
ENSG00000090581	GNPTG	337.841	0.383239	0.250649	1.52898	0.126269	0.983723	245.332	361.622	266.674	296.768	347.467	304.23	559.824	320.813
ENSG00000161526	SAP30BP	232.944	0.361763	0.236641	1.52875	0.126328	0.983723	186.388	223.594	207.935	195.943	226.798	214.958	383.282	224.652
ENSG00000115844	DLX2	1.64903	1.9376	1.26749	1.52868	0.126343	0.983723	0	0.624564	0	1.90236	2.18075	2.34927	1.16146	4.97385
ENSG00000188846	RPL14	293.86	0.510226	0.333798	1.52855	0.126377	0.983723	184.795	322.899	212.634	247.306	311.848	226.704	599.313	245.376
ENSG00000107371	EXOSC3	67.6493	0.494769	0.323751	1.52824	0.126453	0.983723	68.5017	61.8318	48.1658	45.6566	64.6957	75.1765	126.599	50.5675
ENSG00000164674	SYTL3	9.68896	-0.733042	0.479706	-1.52811	0.126486	0.983723	9.55838	12.4913	14.0973	12.3653	6.54226	5.87317	5.8073	10.7767
ENSG00000100028	SNRPD3	287.232	0.48423	0.316885	1.52809	0.126489	0.983723	237.366	274.183	234.955	210.21	250.787	245.498	596.991	247.863
ENSG00000086758	HUWE1	177.142	-0.530567	0.347231	-1.52799	0.126514	0.983723	269.228	129.909	218.508	221.625	171.553	171.496	61.5574	173.256
ENSG00000165115	KIF27	10.4824	0.691268	0.452404	1.52799	0.126515	0.983723	4.77919	8.74389	9.39821	8.56061	13.0845	12.921	13.9375	12.4346
ENSG00000105258	POLR2I	28.204	0.52113	0.341082	1.52787	0.126544	0.983723	22.3029	24.9825	19.9712	24.7306	34.1652	24.6673	49.9428	24.8692
ENSG00000141698	NT5C3B	353.472	0.329982	0.215988	1.52778	0.126568	0.983723	296.31	321.026	318.364	315.791	349.648	331.247	556.339	339.051
ENSG00000132361	CLUH	98.587	-0.65143	0.42643	-1.52764	0.126602	0.983723	129.038	113.671	128.051	112.239	98.134	81.0497	16.2604	110.254
ENSG00000224738	AC099850.1	7.63855	1.21592	0.795954	1.52763	0.126604	0.983723	4.77919	6.8702	2.34955	3.80471	4.36151	10.5717	26.7136	1.65795
ENSG00000124207	CSE1L	455.632	-0.242568	0.158795	-1.52755	0.126623	0.983723	506.594	465.3	519.251	485.101	431.062	482.774	355.407	399.566
ENSG00000163191	S100A11	3141.54	0.456211	0.29872	1.52722	0.126707	0.983723	2536.16	2737.46	2748.98	2571.99	2825.53	2741.59	6371.77	2598.84
ENSG00000104907	TRMT1	135.875	0.320197	0.209674	1.52712	0.126731	0.983723	87.6185	134.906	138.624	119.848	154.834	144.48	170.735	135.952
ENSG00000164904	ALDH7A1	272.803	0.273352	0.179022	1.52692	0.12678	0.983723	248.518	228.59	277.247	233.99	260.237	274.864	358.891	300.089
ENSG00000186812	ZNF397	20.4908	0.615316	0.402991	1.52687	0.126793	0.983723	9.55838	15.6141	12.9225	25.6818	29.0767	21.1434	32.5209	17.4085
ENSG00000232112	TMA7	49.8635	0.588995	0.385823	1.52659	0.126862	0.983723	39.8266	42.4703	36.4181	39.9495	45.7958	31.7151	113.823	48.9095
ENSG00000124243	BCAS4	87.7226	0.412015	0.26994	1.52632	0.12693	0.983723	78.0601	76.8213	65.7874	79.899	98.134	74.0019	148.667	80.4105
ENSG00000224080	UBE2FP1	1.53339	1.89769	1.24334	1.52628	0.12694	0.983723	0	1.24913	0	0.951178	2.90767	2.34927	2.32292	2.48692
ENSG00000261377	PDCD6IPP2	7.48567	0.902434	0.591296	1.5262	0.126961	0.983723	4.77919	6.24564	5.87388	3.80471	9.44994	3.5239	16.2604	9.9477
ENSG00000135763	URB2	41.4673	-0.770261	0.504745	-1.52604	0.127	0.983723	76.4671	43.0949	41.1172	49.4613	37.0728	38.7629	3.48438	42.2777
ENSG00000166192	SENP8	16.5249	0.66388	0.435351	1.52493	0.127276	0.983723	17.5237	7.49476	17.6216	9.51178	13.0845	24.6673	23.2292	19.0664
ENSG00000131351	HAUS8	11.8298	0.869454	0.570374	1.52436	0.12742	0.983723	7.96532	7.49476	8.22343	9.51178	14.5384	10.5717	31.3594	4.97385
ENSG00000132541	RIDA	91.5158	0.595284	0.39053	1.5243	0.127434	0.983723	86.0254	56.8353	71.6613	77.0455	74.1457	83.399	218.355	64.66
ENSG00000197808	ZNF461	18.3105	-0.727561	0.477339	-1.5242	0.127458	0.983723	11.1514	29.9791	14.0973	35.1936	12.3576	7.0478	20.9063	15.7505
ENSG00000116691	MIIP	66.4709	0.437407	0.286985	1.52414	0.127472	0.983723	46.1988	73.074	52.8649	52.3148	94.4994	57.557	96.4012	58.8572
ENSG00000106772	PRUNE2	85.55	-0.469049	0.307789	-1.52393	0.127526	0.983723	114.701	79.9442	98.6812	104.63	55.2458	101.018	40.6511	89.5293
ENSG00000149273	RPS3	1653.36	0.402101	0.263926	1.52354	0.127624	0.983723	1285.6	1571.4	1463.77	1375.4	1589.04	1393.12	3005.86	1542.72
ENSG00000136770	DNAJC1	127.508	0.268423	0.176213	1.52328	0.127688	0.983723	109.921	119.292	113.953	118.897	139.568	125.686	150.99	141.755
ENSG00000089289	IGBP1	156.23	0.399532	0.262294	1.52322	0.127703	0.983723	140.19	141.776	131.575	124.604	138.841	137.432	272.943	162.479
ENSG00000187699	C2orf88	7.33254	0.994314	0.652813	1.52312	0.127728	0.983723	4.77919	6.8702	5.87388	1.90236	5.08843	12.921	4.64584	16.5795
ENSG00000143256	PFDN2	204.55	0.548565	0.360188	1.523	0.127759	0.983723	138.597	190.492	160.944	173.114	196.268	142.131	465.746	169.111
ENSG00000144161	ZC3H8	52.8945	0.506863	0.332808	1.52299	0.127761	0.983723	25.489	48.716	41.1172	57.0707	47.2497	70.478	88.271	44.7646
ENSG00000092036	HAUS4	7.54646	0.830167	0.54511	1.52293	0.127775	0.983723	4.77919	4.99651	7.04866	4.75589	7.9961	9.39707	13.9375	7.46077
ENSG00000154174	TOMM70	209.95	-0.336728	0.221108	-1.52291	0.127781	0.983723	280.379	216.099	192.663	250.16	204.264	200.862	131.245	203.928
ENSG00000139324	TMTC3	172.009	-0.334137	0.219465	-1.52251	0.127882	0.983723	254.89	169.881	163.294	181.675	150.472	165.623	121.953	168.282
ENSG00000164107	HAND2	12.1146	0.883459	0.580304	1.52241	0.127907	0.983723	11.1514	7.49476	5.87388	9.51178	12.3576	8.22243	34.8438	7.46077
ENSG00000130066	SAT1	2028.51	0.466881	0.306701	1.52227	0.127943	0.983723	1591.47	1801.24	1789.18	1629.37	1880.54	1759.6	4174.29	1602.41
ENSG00000102030	NAA10	94.9796	0.397659	0.261237	1.52222	0.127955	0.983723	78.0601	88.688	85.7586	74.1919	96.6801	91.6214	160.282	84.5554
ENSG00000165406	2024-03-08	44.1719	-0.495653	0.325643	-1.52207	0.127991	0.983723	65.3156	45.5932	54.0397	43.7542	38.5267	29.3658	22.0677	54.7123
ENSG00000161551	ZNF577	35.4516	0.538739	0.354007	1.52183	0.128052	0.983723	27.0821	25.6071	36.4181	26.633	26.896	28.1912	58.073	54.7123
ENSG00000116750	UCHL5	148.182	0.39521	0.259698	1.5218	0.128059	0.983723	130.631	134.281	122.177	123.653	138.841	165.623	250.875	119.372
ENSG00000116497	S100PBP	102.882	-0.38881	0.255519	-1.52165	0.128098	0.983723	117.887	138.029	96.3316	115.093	119.215	85.7482	60.3959	90.3582
ENSG00000275131	AC241952.1	7.2187	-0.934952	0.614526	-1.52142	0.128155	0.983723	12.7445	7.49476	12.9225	4.75589	3.63459	9.39707	3.48438	3.3159
ENSG00000150779	TIMM8B	260.698	0.491666	0.323371	1.52044	0.1284	0.983723	186.388	235.461	200.887	242.551	228.252	207.91	547.048	237.087
ENSG00000276953	TRBV12-4	1.66832	1.95629	1.28725	1.51974	0.128577	0.983723	0	1.24913	1.17478	0	1.45384	1.17463	5.8073	2.48692
ENSG00000165626	BEND7	18.7079	-0.717107	0.471965	-1.51941	0.12866	0.983723	17.5237	20.6106	14.0973	40.9007	13.0845	14.0956	6.96876	22.3823
ENSG00000072756	TRNT1	124.223	0.379977	0.250137	1.51908	0.128744	0.983723	106.735	119.292	109.254	95.1178	111.218	129.21	204.417	118.543
ENSG00000108511	HOXB6	3.88262	1.29803	0.854827	1.51847	0.128896	0.983723	3.18613	2.49825	2.34955	0.951178	3.63459	2.34927	12.7761	3.3159
ENSG00000099385	BCL7C	85.2156	0.411989	0.271393	1.51805	0.129001	0.983723	66.9087	82.4424	70.4866	71.3384	90.1379	72.8273	146.344	81.2395
ENSG00000203950	RTL8A	253.067	0.457148	0.301173	1.51789	0.129042	0.983723	189.575	225.468	196.188	240.648	252.241	197.338	495.943	227.139
ENSG00000163956	LRPAP1	1176.33	0.348447	0.22957	1.51783	0.129058	0.983723	839.545	1280.98	1036.15	980.665	1303.36	1005.49	1784	1180.46
ENSG00000072832	CRMP1	11.1443	-0.698273	0.4601	-1.51766	0.129101	0.983723	9.55838	14.9895	17.6216	12.3653	7.26918	12.921	6.96876	7.46077
ENSG00000104365	IKBKB	122.817	-0.353202	0.2328	-1.51719	0.129217	0.983723	132.224	111.172	164.469	144.579	104.676	116.289	78.9793	130.149
ENSG00000185900	POMK	22.4784	-0.812986	0.536041	-1.51665	0.129355	0.983723	27.0821	15.6141	48.1658	24.7306	21.0806	17.6195	2.32292	23.2113
ENSG00000101849	TBL1X	47.2105	0.558822	0.36849	1.51652	0.129389	0.983723	31.8613	49.9651	49.3406	20.9259	50.8843	77.5258	32.5209	64.66
ENSG00000131495	NDUFA2	143.42	0.544742	0.359326	1.51601	0.129516	0.983723	78.0601	129.909	121.002	136.019	148.291	109.241	311.271	113.57
ENSG00000198839	ZNF277	31.6985	0.58589	0.386526	1.51578	0.129574	0.983723	23.896	38.0984	14.0973	23.7795	35.619	28.1912	59.2345	30.6721
ENSG00000254858	MPV17L2	189.256	0.392587	0.259019	1.51567	0.129604	0.983723	122.666	180.499	182.09	167.407	202.083	167.973	314.756	176.572
ENSG00000146232	NFKBIE	69.8962	0.39083	0.257874	1.51559	0.129623	0.983723	70.0948	61.2072	50.5154	59.9242	75.5995	70.478	109.177	62.1731
ENSG00000100299	ARSA	74.1302	0.438989	0.289665	1.51551	0.129644	0.983723	50.978	88.0635	69.3118	41.8519	87.9571	66.9541	103.37	84.5554
ENSG00000184154	LRTOMT	28.395	0.582241	0.384214	1.51541	0.12967	0.983723	17.5237	22.4843	29.3694	20.9259	37.0728	36.4136	47.6199	15.7505
ENSG00000118495	PLAGL1	128.254	-0.410451	0.270856	-1.51539	0.129674	0.983723	119.48	128.66	159.77	177.87	123.576	135.083	63.8803	117.714
ENSG00000132170	PPARG	7.19632	0.895213	0.590882	1.51505	0.129761	0.983723	4.77919	3.12282	4.6991	7.60943	7.26918	5.87317	15.099	9.11872
ENSG00000163900	TMEM41A	107.79	0.473864	0.312773	1.51504	0.129761	0.983723	79.6532	106.8	92.8073	79.899	90.8648	122.162	205.578	84.5554
ENSG00000137364	TPMT	116.435	0.411581	0.271805	1.51425	0.129962	0.983723	84.4324	96.1828	110.429	107.483	123.576	113.939	200.933	94.5031
ENSG00000141985	SH3GL1	201.821	-0.463479	0.306079	-1.51424	0.129964	0.983723	234.18	216.099	263.15	223.527	183.91	199.688	74.3334	219.678
ENSG00000179271	GADD45GIP1	363.207	0.498529	0.32931	1.51386	0.130061	0.983723	226.215	372.865	306.616	296.768	360.551	259.594	745.657	337.393
ENSG00000147799	ARHGAP39	4.99869	-1.19905	0.792647	-1.51272	0.130351	0.983723	11.1514	4.37195	9.39821	3.80471	7.26918	1.17463	1.16146	1.65795
ENSG00000167377	ZNF23	3.5904	1.26305	0.834975	1.51268	0.130361	0.983723	3.18613	1.24913	2.34955	1.90236	4.36151	7.0478	6.96876	1.65795
ENSG00000152076	CCDC74B	7.32722	0.849047	0.561347	1.51252	0.130402	0.983723	1.59306	6.8702	5.87388	5.70707	10.9038	11.7463	9.29168	6.6318
ENSG00000203705	TATDN3	78.0565	0.329004	0.217525	1.51249	0.13041	0.983723	74.874	61.8318	75.1857	65.6313	86.5033	102.193	83.6251	74.6077
ENSG00000131634	TMEM204	48.0411	0.543129	0.359156	1.51224	0.130473	0.983723	30.2682	55.5862	28.1946	40.9007	71.238	34.0644	80.1408	43.9357
ENSG00000228787	NLGN4Y-AS1	37.2623	0.743028	0.491467	1.51186	0.13057	0.983723	28.6751	30.6036	21.146	30.4377	32.7113	21.1434	106.854	26.5272
ENSG00000124172	ATP5F1E	835.958	0.48172	0.318656	1.51172	0.130604	0.983723	643.598	786.95	677.846	681.044	798.156	623.73	1752.64	723.695
ENSG00000232527	AC245595.1	24.0165	0.776086	0.513532	1.51127	0.13072	0.983723	20.7098	16.8632	19.9712	13.3165	19.6268	10.5717	66.2032	24.8692
ENSG00000125447	GGA3	51.2223	-0.604223	0.399862	-1.51108	0.130768	0.983723	58.9434	56.8353	58.7388	73.2407	44.342	51.6839	10.4531	55.5413
ENSG00000185608	MRPL40	271.079	0.479726	0.317477	1.51106	0.130773	0.983723	199.133	270.436	213.809	220.673	250.06	214.958	557.501	242.061
ENSG00000237214	AL080243.2	1.48145	2.1443	1.41912	1.511	0.130788	0.983723	0	0	1.17478	0.951178	0.726918	3.5239	4.64584	0.828975
ENSG00000257354	AC048341.1	20.7953	-0.605195	0.400577	-1.51081	0.130838	0.983723	22.3029	14.365	31.7189	32.3401	13.8114	21.1434	11.6146	19.0664
ENSG00000120693	SMAD9	12.6928	-0.674115	0.446251	-1.51062	0.130886	0.983723	17.5237	13.7404	11.7478	19.9747	10.9038	10.5717	4.64584	12.4346
ENSG00000102359	SRPX2	164.849	0.283791	0.187887	1.51044	0.130931	0.983723	143.376	161.762	144.497	143.628	163.557	159.75	220.677	181.545
ENSG00000102003	SYP	1.25161	2.28198	1.51081	1.51043	0.130934	0.983723	0	1.24913	0	0	1.45384	1.17463	1.16146	4.97385
ENSG00000162869	PPP1R21	85.3271	-0.315753	0.209091	-1.51012	0.131012	0.983723	111.514	92.4354	86.9334	89.4108	87.2302	69.3034	72.0105	73.7787
ENSG00000111817	DSE	373.095	-0.318482	0.210946	-1.50978	0.1311	0.983723	412.603	370.991	452.289	422.323	353.282	350.041	225.323	397.908
ENSG00000198763	MT-ND2	1544.37	0.444225	0.294275	1.50955	0.131157	0.983723	1245.78	1239.76	1315.75	1431.52	1405.13	1431.88	3061.61	1223.57
ENSG00000170921	TANC2	48.4491	-0.483732	0.320459	-1.50949	0.131172	0.983723	81.2462	42.4703	39.9424	63.729	35.619	45.8107	29.0365	49.7385
ENSG00000176261	ZBTB8OS	139.551	0.466104	0.308858	1.50912	0.131269	0.983723	125.852	120.541	111.604	110.337	135.934	106.892	277.589	127.662
ENSG00000167258	CDK12	22.8326	-0.554301	0.367308	-1.50909	0.131275	0.983723	23.896	21.8597	28.1946	35.1936	20.3537	22.318	9.29168	21.5533
ENSG00000169567	HINT1	1042.06	0.472628	0.313217	1.50895	0.131313	0.983723	853.882	999.927	817.644	818.965	995.151	763.512	2144.06	943.373
ENSG00000251281	AC034223.2	15.4787	0.661019	0.438211	1.50845	0.13144	0.983723	15.9306	14.365	7.04866	10.463	19.6268	14.0956	29.0365	13.2636
ENSG00000189001	SBSN	1.11172	2.50506	1.66074	1.5084	0.131451	0.983723	1.59306	0	0	0	1.45384	3.5239	2.32292	0
ENSG00000060138	YBX3	791.813	0.293647	0.194699	1.50821	0.131501	0.983723	740.775	748.852	637.903	717.189	803.245	797.576	1160.3	728.669
ENSG00000108306	FBXL20	61.9762	-0.360169	0.238883	-1.50772	0.131625	0.983723	65.3156	70.5757	64.6127	77.0455	45.7958	69.3034	47.6199	55.5413
ENSG00000174851	YIF1A	938.92	0.434268	0.288209	1.50678	0.131867	0.983723	640.412	873.765	889.305	789.478	905.013	784.655	1789.81	838.922
ENSG00000175265	GOLGA8A	28.8619	-0.446553	0.296365	-1.50677	0.13187	0.983723	41.4197	29.9791	30.5442	32.3401	26.1691	24.6673	20.9063	24.8692
ENSG00000197903	HIST1H2BK	183.948	0.478501	0.317713	1.50608	0.132047	0.983723	141.783	161.137	170.342	140.774	188.272	138.607	373.99	156.676
ENSG00000157554	ERG	1.81225	-2.57056	1.70712	-1.50579	0.132121	0.983723	0	0.624564	10.573	0.951178	0	2.34927	0	0
ENSG00000263063	AC024361.2	1.28543	2.26739	1.50593	1.50563	0.132161	0.983723	0	1.24913	0	0	0.726918	1.17463	4.64584	2.48692
ENSG00000164587	RPS14	1368.82	0.481072	0.319525	1.50558	0.132174	0.983723	978.141	1317.83	1144.23	1129.05	1341.16	1047.77	2858.35	1134.04
ENSG00000153234	NR4A2	1.27602	2.09075	1.38896	1.50526	0.132256	0.983723	0	0.624564	1.17478	0	2.90767	2.34927	2.32292	0.828975
ENSG00000254842	LINC02551	1.11539	2.578	1.71295	1.50501	0.132322	0.983723	0	0	1.17478	0	0.726918	4.69853	2.32292	0
ENSG00000280254	AC233723.2	2.84815	-1.73652	1.15395	-1.50485	0.132362	0.983723	11.1514	3.74738	1.17478	1.90236	3.63459	1.17463	0	0
ENSG00000206562	METTL6	51.3075	0.44432	0.295266	1.50481	0.132372	0.983723	36.6405	49.9651	36.4181	49.4613	60.3342	42.2868	84.7866	50.5675
ENSG00000261338	AC021016.2	12.5846	-0.79025	0.525496	-1.50382	0.132628	0.983723	23.896	6.8702	14.0973	19.9747	10.1769	10.5717	3.48438	11.6056
ENSG00000126267	COX6B1	474.593	0.521087	0.346601	1.50342	0.13273	0.983723	293.124	444.689	388.851	430.884	462.32	352.39	1040.67	383.815
ENSG00000088986	DYNLL1	1349.83	0.470649	0.313061	1.50338	0.132742	0.983723	1045.05	1236.64	1147.76	1095.76	1299	1006.66	2795.63	1172.17
ENSG00000255284	AP006621.3	6.39223	1.27226	0.846373	1.50319	0.132791	0.983723	0	6.24564	8.22343	0	7.26918	3.5239	15.099	10.7767
ENSG00000153107	ANAPC1	84.4518	-0.728753	0.484871	-1.50298	0.132844	0.983723	148.155	76.1968	89.283	108.434	67.6034	103.368	10.4531	72.1208
ENSG00000171488	LRRC8C	20.3505	-0.673908	0.44847	-1.50268	0.13292	0.983723	19.1168	21.2352	45.8163	14.2677	20.3537	18.7941	11.6146	11.6056
ENSG00000196262	PPIA	2433.61	0.395226	0.263016	1.50267	0.132925	0.983723	1930.79	2194.09	2203.88	2079.28	2344.31	2056.78	4435.62	2224.14
ENSG00000196323	ZBTB44	20.4678	-0.579507	0.385724	-1.50239	0.132997	0.983723	39.8266	19.986	22.3207	17.1212	15.9922	19.9688	12.7761	15.7505
ENSG00000169976	SF3B5	440.774	0.498981	0.332153	1.50226	0.133029	0.983723	277.193	439.693	363.006	379.52	437.605	320.675	922.199	386.302
ENSG00000167815	PRDX2	415.663	0.44736	0.297859	1.50192	0.133119	0.983723	286.751	439.693	326.588	351.936	472.497	333.596	773.532	340.709
ENSG00000218582	GAPDHP63	3.11024	1.35271	0.900725	1.50181	0.133147	0.983723	1.59306	1.87369	3.52433	0	2.90767	4.69853	6.96876	3.3159
ENSG00000179965	ZNF771	60.0722	0.509681	0.339489	1.50132	0.133273	0.983723	36.6405	60.5827	59.9136	39.9495	75.5995	46.9853	110.339	50.5675
ENSG00000261040	WFDC21P	177.608	0.536482	0.357459	1.50082	0.133402	0.983723	143.376	156.141	118.652	160.749	162.103	119.813	398.381	161.65
ENSG00000239883	PARGP1	5.71536	0.957473	0.638002	1.50074	0.133423	0.983723	4.77919	1.87369	4.6991	4.75589	9.44994	8.22243	6.96876	4.97385
ENSG00000138430	OLA1	253.896	0.336335	0.224175	1.50032	0.133531	0.983723	218.25	224.843	218.508	234.941	260.964	244.324	403.027	226.31
ENSG00000162384	C1orf123	173.439	0.396325	0.264243	1.49985	0.133654	0.983723	149.748	166.134	152.721	129.36	170.826	158.576	304.303	155.847
ENSG00000100387	RBX1	451.533	0.482085	0.321436	1.49979	0.13367	0.983723	334.543	431.574	367.705	371.911	415.797	337.12	946.59	407.027
ENSG00000137040	RANBP6	133.566	-0.484671	0.323181	-1.49969	0.133695	0.983723	191.168	113.671	151.546	168.359	111.218	133.908	51.1042	147.557
ENSG00000103152	MPG	172.586	0.418041	0.278771	1.49958	0.133722	0.983723	119.48	174.253	169.168	126.507	191.906	149.178	298.495	151.702
ENSG00000228022	HCG20	2.87981	1.32701	0.884954	1.49953	0.133737	0.983723	0	1.87369	3.52433	0.951178	4.36151	4.69853	3.48438	4.14487
ENSG00000196683	TOMM7	375.922	0.533864	0.356054	1.49939	0.133773	0.983723	266.042	347.257	297.218	316.742	340.198	276.039	862.965	300.918
ENSG00000158716	DUSP23	84.9432	0.52998	0.353541	1.49906	0.133857	0.983723	76.4671	74.9476	57.564	68.4849	79.2341	61.0809	184.672	77.0946
ENSG00000124839	RAB17	1.93566	2.00952	1.34062	1.49895	0.133887	0.983723	1.59306	0.624564	1.17478	0	1.45384	2.34927	0	8.28975
ENSG00000108094	CUL2	317.353	-0.247698	0.165253	-1.49891	0.133898	0.983723	371.184	315.405	324.238	369.057	324.932	306.579	255.521	271.904
ENSG00000171467	ZNF318	13.971	-0.736803	0.49158	-1.49885	0.133914	0.983723	20.7098	13.1158	25.8451	11.4141	14.5384	9.39707	3.48438	13.2636
ENSG00000182362	YBEY	34.6664	0.504036	0.336328	1.49865	0.133965	0.983723	22.3029	34.351	28.1946	28.5354	40.7074	28.1912	62.7188	32.33
ENSG00000151498	ACAD8	123.841	0.303359	0.202437	1.49853	0.133995	0.983723	95.5838	126.162	105.73	113.19	129.391	160.925	142.86	116.885
ENSG00000267280	TBX2-AS1	1.05937	2.59696	1.73303	1.49851	0.134001	0.983723	0	0.624564	0	0	0	4.69853	2.32292	0.828975
ENSG00000136950	ARPC5L	264.502	0.465915	0.31093	1.49846	0.134015	0.983723	189.575	241.706	237.305	218.771	244.245	194.989	530.787	258.64
ENSG00000106245	BUD31	132.456	0.435339	0.290539	1.49838	0.134034	0.983723	84.4324	148.646	111.604	103.678	144.657	103.368	226.485	136.781
ENSG00000166681	BEX3	737.374	0.470404	0.313956	1.49831	0.134053	0.983723	576.689	707.631	595.611	591.633	713.107	560.3	1521.51	632.508
ENSG00000186577	SMIM29	385.787	0.437081	0.291768	1.49805	0.134122	0.983723	293.124	352.879	344.209	319.596	381.632	327.723	747.98	319.155
ENSG00000111142	METAP2	325.466	0.305653	0.204051	1.49792	0.134153	0.983723	274.007	325.398	293.694	269.184	319.844	342.993	478.522	300.089
ENSG00000258791	LINC00520	9.16963	1.06083	0.708429	1.49744	0.13428	0.983723	1.59306	6.8702	5.87388	8.56061	8.72302	8.22243	30.198	3.3159
ENSG00000204628	RACK1	2766.22	0.405411	0.270794	1.49712	0.134362	0.983723	2142.67	2554.47	2384.79	2436.92	2728.85	2344.57	5130.17	2407.34
ENSG00000173599	PC	76.7298	-0.453613	0.303025	-1.49695	0.134406	0.983723	86.0254	85.5652	85.7586	98.9226	98.8609	56.3824	36.0053	66.318
ENSG00000140988	RPS2	1772.97	0.357623	0.238922	1.49682	0.134441	0.983723	1370.03	1636.98	1616.49	1592.27	1834.74	1523.5	2973.34	1636.4
ENSG00000128011	LRFN1	0.938218	-2.57715	1.72188	-1.49671	0.13447	0.983723	0	0.624564	2.34955	3.80471	0.726918	0	0	0
ENSG00000248161	AC098487.1	9.81293	0.922473	0.616515	1.49627	0.134583	0.983723	7.96532	4.99651	3.52433	10.463	7.9961	8.22243	27.875	7.46077
ENSG00000138246	DNAJC13	178.552	-0.485606	0.324563	-1.49618	0.134606	0.983723	219.843	183.622	203.236	227.332	151.926	199.688	60.3959	182.374
ENSG00000198034	RPS4X	645.406	0.424044	0.28344	1.49606	0.134638	0.983723	530.49	599.581	508.678	565	668.765	512.14	1220.69	557.9
ENSG00000198730	CTR9	318.406	-0.36714	0.245405	-1.49606	0.134638	0.983723	344.102	295.419	392.375	404.251	269.687	293.658	178.865	368.894
ENSG00000102038	SMARCA1	697.639	-0.266736	0.17834	-1.49566	0.134743	0.983723	849.103	680.15	770.653	750.48	660.769	684.811	485.49	699.655
ENSG00000131435	PDLIM4	400.595	0.413916	0.27676	1.49557	0.134765	0.983723	281.972	405.342	348.908	335.766	388.901	351.215	732.881	359.775
ENSG00000265750	AC090772.3	1.03148	2.50624	1.67595	1.49541	0.134808	0.983723	0	0	0	0.951178	1.45384	3.5239	2.32292	0
ENSG00000116670	MAD2L2	88.8087	0.56889	0.380444	1.49533	0.134828	0.983723	46.1988	99.9302	76.3604	61.8266	105.403	65.7795	186.995	67.9759
ENSG00000158864	NDUFS2	886.533	0.356113	0.238303	1.49437	0.135079	0.983723	772.636	836.915	803.547	696.263	826.506	858.657	1493.64	804.105
ENSG00000082515	MRPL22	187.926	0.499561	0.334311	1.4943	0.135097	0.983723	137.003	205.481	138.624	139.823	165.737	169.147	392.574	155.018
ENSG00000230177	AL080317.1	1.37739	-2.15018	1.43906	-1.49415	0.135135	0.983723	1.59306	1.87369	2.34955	2.85354	0	2.34927	0	0
ENSG00000218426	AL590867.2	26.7951	0.631841	0.422893	1.49409	0.135152	0.983723	19.1168	28.7299	14.0973	20.9259	29.0767	19.9688	59.2345	23.2113
ENSG00000101365	IDH3B	464.476	0.378442	0.253332	1.49386	0.135213	0.983723	457.209	397.847	392.375	368.106	458.685	408.772	808.376	424.435
ENSG00000187556	NANOS3	2.14774	1.93282	1.29394	1.49375	0.13524	0.983723	1.59306	1.87369	0	0	5.08843	0	6.96876	1.65795
ENSG00000029639	TFB1M	56.1731	0.480729	0.321856	1.49361	0.135277	0.983723	47.7919	57.4599	41.1172	39.9495	51.6112	54.0331	106.854	50.5675
ENSG00000139597	N4BP2L1	4.73814	1.12865	0.755694	1.49353	0.135298	0.983723	1.59306	1.87369	3.52433	4.75589	6.54226	3.5239	12.7761	3.3159
ENSG00000143774	GUK1	1447.52	0.419103	0.280613	1.49353	0.135299	0.983723	1107.18	1372.79	1217.07	1256.51	1493.82	1095.93	2703.88	1332.99
ENSG00000166562	SEC11C	253.386	0.48829	0.326965	1.4934	0.135332	0.983723	194.354	231.089	202.061	214.966	242.064	187.941	536.595	218.02
ENSG00000135069	PSAT1	2640.22	0.229306	0.15355	1.49337	0.135342	0.983723	2403.93	2536.35	2438.83	2342.75	2762.29	2645.27	3456.51	2535.83
ENSG00000119396	RAB14	567.54	-0.244984	0.164091	-1.49297	0.135444	0.983723	678.645	549.616	610.883	623.973	461.593	614.333	483.167	518.109
ENSG00000135845	PIGC	106.211	0.529706	0.355079	1.4918	0.135752	0.983723	73.2809	92.4354	93.9821	86.5572	90.8648	130.384	218.355	63.831
ENSG00000126067	PSMB2	777.379	0.378106	0.25348	1.49166	0.135789	0.983723	645.191	801.94	653.175	602.096	724.011	769.385	1342.65	680.588
ENSG00000176399	DMRTA1	15.4015	0.688367	0.461479	1.49165	0.13579	0.983723	4.77919	13.7404	18.7964	9.51178	29.0767	17.6195	13.9375	15.7505
ENSG00000160050	CCDC28B	40.9168	0.597611	0.400678	1.4915	0.13583	0.983723	17.5237	44.344	23.4955	42.803	34.8921	34.0644	81.3022	48.9095
ENSG00000224843	LINC00240	1.42583	2.18369	1.46418	1.49141	0.135855	0.983723	1.59306	0.624564	0	0	2.18075	3.5239	3.48438	0
ENSG00000179010	MRFAP1	971.941	0.331542	0.222319	1.49129	0.135886	0.983723	748.74	952.46	864.635	875.084	985.701	857.482	1538.93	952.492
ENSG00000158805	ZNF276	17.8799	0.609865	0.408982	1.49118	0.135915	0.983723	14.3376	10.6176	16.4469	16.17	26.1691	22.318	10.4531	26.5272
ENSG00000082898	XPO1	185.272	-0.427301	0.28661	-1.49088	0.135994	0.983723	208.691	178.625	210.285	253.013	169.372	212.609	81.3022	168.282
ENSG00000155959	VBP1	274.061	0.424864	0.285007	1.49072	0.136036	0.983723	270.821	231.713	202.061	231.136	276.956	239.625	512.204	227.968
ENSG00000105193	RPS16	496.857	0.495306	0.332374	1.49021	0.13617	0.983723	328.171	478.416	442.89	398.544	488.489	375.883	1054.61	407.856
ENSG00000196531	NACA	1142.91	0.443122	0.297449	1.48974	0.136292	0.983723	885.743	1098.61	910.451	978.763	1080.2	885.674	2260.2	1043.68
ENSG00000175756	AURKAIP1	441.072	0.463832	0.311381	1.4896	0.13633	0.983723	312.24	467.798	355.957	345.278	438.332	339.469	875.741	393.763
ENSG00000137760	ALKBH8	36.9425	-0.50074	0.336213	-1.48935	0.136395	0.983723	65.3156	36.2247	35.2433	38.0471	26.1691	29.3658	22.0677	43.1067
ENSG00000124357	NAGK	723.296	0.391232	0.262693	1.48931	0.136406	0.983723	570.317	697.013	633.204	601.145	727.645	635.477	1297.35	624.218
ENSG00000174891	RSRC1	34.2174	0.549917	0.369298	1.48909	0.136464	0.983723	25.489	28.7299	36.4181	19.9747	36.3459	32.8897	67.3647	26.5272
ENSG00000168538	TRAPPC11	167.283	-0.422853	0.284058	-1.48861	0.136589	0.983723	192.761	163.636	206.761	204.503	169.372	176.195	70.8491	154.189
ENSG00000271976	AC012467.2	3.01306	1.42352	0.956405	1.4884	0.136644	0.983723	3.18613	0.624564	1.17478	1.90236	2.18075	9.39707	2.32292	3.3159
ENSG00000206527	HACD2	191.119	-0.309092	0.207676	-1.48834	0.136661	0.983723	226.215	176.127	238.479	207.357	175.914	186.767	126.599	191.493
ENSG00000224982	TMEM233	20.6349	0.722542	0.485569	1.48803	0.136742	0.983723	19.1168	14.365	16.4469	12.3653	14.5384	14.0956	53.4272	20.7244
ENSG00000198157	HMGN5	11.4959	0.838237	0.563377	1.48788	0.136783	0.983723	7.96532	12.4913	7.04866	4.75589	13.8114	9.39707	29.0365	7.46077
ENSG00000198899	MT-ATP6	2209.18	0.415886	0.27953	1.4878	0.136803	0.983723	1954.69	1839.96	1950.13	1826.26	2008.47	2020.37	4232.36	1841.15
ENSG00000232453	AC105277.1	7.3881	0.951207	0.639425	1.4876	0.136857	0.983723	4.77919	6.24564	4.6991	3.80471	5.08843	12.921	17.4219	4.14487
ENSG00000189043	NDUFA4	1076.29	0.485483	0.326404	1.48737	0.136918	0.983723	822.021	953.084	901.053	910.278	977.705	790.528	2314.79	940.886
ENSG00000099800	TIMM13	399.56	0.507294	0.341142	1.48704	0.137003	0.983723	305.868	387.854	290.17	334.815	378.724	311.278	876.902	310.865
ENSG00000277758	FO681492.1	3.41591	1.27494	0.857467	1.48687	0.137049	0.983723	3.18613	1.24913	0	3.80471	5.08843	5.87317	2.32292	5.80282
ENSG00000077264	PAK3	55.9452	-0.374215	0.251732	-1.48656	0.13713	0.983723	73.2809	48.0914	64.6127	68.4849	50.1574	39.9375	49.9428	53.0544
ENSG00000178537	SLC25A20	251.503	0.339343	0.228311	1.48632	0.137195	0.983723	205.505	249.825	205.586	225.429	264.598	232.577	397.219	231.284
ENSG00000198468	FLVCR1-AS1	29.785	0.429184	0.288829	1.48595	0.137293	0.983723	23.896	28.7299	25.8451	22.8283	37.0728	34.0644	30.198	35.6459
ENSG00000157916	RER1	950.382	0.384557	0.258841	1.48568	0.137363	0.983723	748.74	933.098	865.81	748.577	924.64	830.466	1682.96	868.765
ENSG00000141741	MIEN1	213.121	0.471715	0.317551	1.48547	0.137418	0.983723	149.748	206.731	156.245	199.747	196.268	186.767	432.063	177.401
ENSG00000272031	ANKRD34A	16.6334	-0.790798	0.532416	-1.4853	0.137464	0.983723	20.7098	24.358	14.0973	25.6818	11.6307	9.39707	2.32292	24.8692
ENSG00000173457	PPP1R14B	526.057	0.409703	0.275879	1.48508	0.137522	0.983723	403.045	507.77	449.939	445.152	559.727	436.964	964.012	441.843
ENSG00000162961	DPY30	241.559	0.504079	0.339592	1.48437	0.137712	0.983723	189.575	252.324	196.188	159.798	236.248	179.719	512.204	206.415
ENSG00000118922	KLF12	17.3033	-0.5894	0.397158	-1.48405	0.137797	0.983723	28.6751	15.6141	17.6216	21.8771	11.6307	18.7941	9.29168	14.9215
ENSG00000257335	MGAM	6.39447	-1.2402	0.835795	-1.48386	0.137847	0.983723	9.55838	6.24564	0	19.9747	4.36151	5.87317	3.48438	1.65795
ENSG00000146083	RNF44	3.7068	1.3936	0.939215	1.4838	0.137863	0.983723	3.18613	1.87369	1.17478	1.90236	0.726918	4.69853	12.7761	3.3159
ENSG00000215105	TTC3P1	18.1916	-0.704141	0.474709	-1.48331	0.137992	0.983723	22.3029	16.8632	9.39821	41.8519	15.9922	12.921	10.4531	15.7505
ENSG00000119760	SUPT7L	172.055	0.246342	0.166115	1.48296	0.138086	0.983723	162.492	168.008	146.847	151.237	184.637	196.164	196.287	170.769
ENSG00000091844	RGS17	49.3824	0.630997	0.425684	1.48231	0.138257	0.983723	47.7919	50.5897	36.4181	19.9747	63.9688	41.1122	104.531	30.6721
ENSG00000075914	EXOSC7	143.805	0.469508	0.316866	1.48172	0.138414	0.983723	111.514	119.292	123.351	127.458	149.018	109.241	290.365	120.201
ENSG00000172965	MIR4435-2HG	321.724	0.433103	0.292306	1.48168	0.138426	0.983723	262.856	317.903	257.276	255.867	334.382	253.721	613.251	278.535
ENSG00000203668	CHML	39.4027	-0.514547	0.347288	-1.48161	0.138444	0.983723	46.1988	42.4703	49.3406	47.5589	29.0767	49.3346	13.9375	37.3039
ENSG00000119705	SLIRP	283.244	0.466966	0.315183	1.48157	0.138454	0.983723	210.284	286.05	212.634	240.648	268.233	207.91	569.115	271.075
ENSG00000042493	CAPG	455.787	0.391261	0.264131	1.48131	0.138523	0.983723	336.136	469.047	402.948	367.155	426.701	414.646	806.053	423.606
ENSG00000180992	MRPL14	490.452	0.460593	0.310959	1.4812	0.138552	0.983723	415.79	429.075	404.123	401.397	468.862	407.598	1010.47	386.302
ENSG00000237758	BANF1P3	0.633327	2.71028	1.82989	1.48112	0.138576	0.983723	0	0	0	0	0.726918	2.34927	1.16146	0.828975
ENSG00000136044	APPL2	219.59	-0.228763	0.154462	-1.48103	0.138597	0.983723	232.587	239.208	234.955	240.648	207.172	222.006	186.995	193.151
ENSG00000177225	GATD1	115.833	0.340466	0.229907	1.48089	0.138637	0.983723	113.108	123.664	89.283	82.7525	131.572	99.8438	146.344	140.097
ENSG00000160352	ZNF714	8.89899	0.823404	0.556076	1.48074	0.138676	0.983723	6.37225	6.8702	9.39821	2.85354	8.72302	12.921	17.4219	6.6318
ENSG00000137135	ARHGEF39	1.30407	-2.21277	1.49459	-1.48053	0.138733	0.983723	0	2.49825	1.17478	4.75589	0	1.17463	0	0.828975
ENSG00000095794	CREM	104.529	0.499503	0.337435	1.48029	0.138795	0.983723	86.0254	95.5582	75.1857	88.4596	96.6801	102.193	218.355	73.7787
ENSG00000189171	S100A13	92.3742	0.529488	0.3577	1.48026	0.138805	0.983723	71.6879	94.9337	62.2631	72.2896	87.2302	64.6048	199.771	86.2134
ENSG00000114744	COMMD2	278.985	-0.284226	0.192025	-1.48015	0.138832	0.983723	383.928	269.812	283.121	290.109	229.706	239.625	298.495	237.087
ENSG00000136895	GARNL3	3.75407	1.31579	0.888979	1.48012	0.138841	0.983723	3.18613	1.24913	3.52433	0.951178	5.08843	9.39707	5.8073	0.828975
ENSG00000168904	LRRC28	90.7323	0.342161	0.231203	1.47991	0.138896	0.983723	71.6879	84.3161	90.4577	72.2896	95.9532	98.6692	131.245	81.2395
ENSG00000188243	COMMD6	275.387	0.487685	0.32955	1.47985	0.138913	0.983723	210.284	265.44	239.654	200.699	287.86	191.465	571.438	236.258
ENSG00000025039	RRAGD	17.4641	0.623189	0.421133	1.47979	0.138929	0.983723	12.7445	8.74389	16.4469	17.1212	19.6268	29.3658	23.2292	12.4346
ENSG00000175279	CENPS	3.20472	1.33614	0.903239	1.47927	0.139067	0.983723	1.59306	2.49825	0	2.85354	6.54226	3.5239	6.96876	1.65795
ENSG00000108187	PBLD	61.9536	0.352101	0.238051	1.4791	0.139114	0.983723	57.3503	64.9546	44.6415	49.4613	61.788	70.478	78.9793	67.9759
ENSG00000171863	RPS7	323.997	0.502267	0.339593	1.47903	0.139133	0.983723	240.553	314.156	250.227	266.33	318.39	243.149	703.845	255.324
ENSG00000125351	UPF3B	32.5229	0.623415	0.42155	1.47887	0.139176	0.983723	31.8613	11.8667	34.0685	25.6818	31.9844	27.0166	66.2032	31.501
ENSG00000135643	KCNMB4	10.0625	0.790001	0.534935	1.47682	0.139725	0.983723	6.37225	4.99651	9.39821	8.56061	8.72302	12.921	22.0677	7.46077
ENSG00000153993	SEMA3D	58.2226	-0.507405	0.343593	-1.47676	0.139739	0.983723	79.6532	60.5827	43.4667	90.362	47.2497	58.7317	24.3907	61.3441
ENSG00000129103	SUMF2	463.954	0.252783	0.171209	1.47646	0.139821	0.983723	369.591	482.788	386.501	451.81	526.289	462.806	572.6	459.252
ENSG00000172428	COPS9	226.199	0.530045	0.359117	1.47597	0.139952	0.983723	146.562	228.59	186.789	176.919	223.164	163.274	505.235	179.059
ENSG00000101911	PRPS2	67.0849	-0.376589	0.255156	-1.47591	0.139967	0.983723	97.1769	67.4529	79.8848	60.8754	56.6996	52.8585	48.7813	72.9498
ENSG00000172594	SMPDL3A	80.8181	0.500023	0.338808	1.47583	0.139989	0.983723	68.5017	70.5757	62.2631	65.6313	83.5956	75.1765	166.089	54.7123
ENSG00000170385	SLC30A1	242.812	-0.456636	0.309435	-1.47571	0.140022	0.983723	307.461	226.092	298.393	292.963	220.983	263.118	90.5939	242.89
ENSG00000163545	NUAK2	52.0534	-0.501679	0.340016	-1.47545	0.14009	0.983723	55.7572	48.0914	68.137	73.2407	51.6112	44.6361	18.5834	56.3703
ENSG00000159261	CLDN14	41.9641	0.719284	0.487575	1.47523	0.140151	0.983723	14.3376	28.1054	37.5928	45.6566	33.4382	35.239	111.5	29.8431
ENSG00000003393	ALS2	188.729	-0.508542	0.344725	-1.47521	0.140155	0.983723	234.18	201.11	199.712	252.062	135.207	213.783	61.5574	212.218
ENSG00000002586	CD99	1700.76	0.407091	0.276	1.47497	0.140221	0.983723	1288.79	1665.09	1467.3	1426.77	1729.34	1364.92	3145.23	1518.68
ENSG00000153551	CMTM7	169.525	0.534021	0.362235	1.47424	0.140418	0.983723	109.921	144.899	145.672	152.189	154.834	135.083	386.766	126.833
ENSG00000249859	PVT1	19.837	0.604808	0.410276	1.47415	0.140442	0.983723	23.896	16.2387	12.9225	10.463	25.4421	19.9688	34.8438	14.9215
ENSG00000198356	ASNA1	514.229	0.3064	0.207874	1.47397	0.140491	0.983723	414.197	519.012	493.406	410.909	551.731	475.727	757.272	491.582
ENSG00000198093	ZNF649	32.2836	-0.521248	0.35372	-1.47362	0.140584	0.983723	23.896	34.9756	51.6901	41.8519	23.9883	23.4927	18.5834	39.7908
ENSG00000104980	TIMM44	189.472	0.337672	0.229147	1.4736	0.140588	0.983723	138.597	173.629	153.896	201.65	204.991	166.798	282.235	193.98
ENSG00000183172	SMDT1	138.253	0.441975	0.299942	1.47353	0.140607	0.983723	108.328	123.039	108.079	128.409	147.564	109.241	263.651	117.714
ENSG00000223658	C1GALT1C1L	2.37578	1.68196	1.14161	1.47333	0.140662	0.983723	0	1.24913	0	2.85354	1.45384	1.17463	8.13022	4.14487
ENSG00000182257	PRR34	0.871607	-2.41109	1.63707	-1.4728	0.140804	0.983723	1.59306	0.624564	1.17478	2.85354	0.726918	0	0	0
ENSG00000177700	POLR2L	1229.09	0.430636	0.292497	1.47228	0.140946	0.983723	995.665	1113.6	1045.55	1032.03	1173.25	989.041	2421.64	1061.92
ENSG00000120053	GOT1	385.512	0.311672	0.211737	1.47197	0.141028	0.983723	350.474	336.64	332.462	355.741	400.532	373.533	592.345	342.367
ENSG00000198832	SELENOM	846.635	0.446164	0.303165	1.47169	0.141106	0.983723	603.771	903.744	681.37	676.288	876.663	643.699	1636.5	751.051
ENSG00000139874	SSTR1	9.03146	-0.971986	0.660556	-1.47147	0.141165	0.983723	17.5237	9.36846	4.6991	16.17	5.08843	14.0956	1.16146	4.14487
ENSG00000169554	ZEB2	161.589	-0.434679	0.295443	-1.47128	0.141216	0.983723	195.947	163.636	162.119	222.576	154.834	148.004	67.3647	178.23
ENSG00000137203	TFAP2A	7.69432	-0.785246	0.533893	-1.47079	0.141347	0.983723	14.3376	9.36846	7.04866	8.56061	5.08843	5.87317	4.64584	6.6318
ENSG00000163960	UBXN7	133.74	-0.411564	0.279845	-1.47069	0.141376	0.983723	154.527	155.516	138.624	162.652	109.765	135.083	60.3959	153.36
ENSG00000119421	NDUFA8	316.51	0.490266	0.333398	1.47051	0.141423	0.983723	216.657	311.657	253.752	269.184	295.129	256.07	675.97	253.666
ENSG00000125821	DTD1	338.055	0.488342	0.332116	1.4704	0.141454	0.983723	226.215	304.163	305.442	288.207	322.025	286.611	718.944	252.837
ENSG00000092931	MFSD11	180.212	0.285733	0.19435	1.4702	0.141507	0.983723	148.155	168.632	153.896	176.919	183.183	187.941	249.714	173.256
ENSG00000247950	SEC24B-AS1	3.53081	1.22125	0.830828	1.46991	0.141585	0.983723	0	2.49825	4.6991	0.951178	5.08843	7.0478	4.64584	3.3159
ENSG00000101457	DNTTIP1	177.707	0.40039	0.272518	1.46922	0.141772	0.983723	135.41	181.123	152.721	141.726	167.918	157.401	317.079	168.282
ENSG00000211818	TRAV39	5.65199	1.01971	0.694155	1.46899	0.141834	0.983723	0	6.8702	1.17478	5.70707	7.9961	7.0478	8.13022	8.28975
ENSG00000154723	ATP5PF	311.139	0.46371	0.315682	1.46891	0.141856	0.983723	261.262	281.678	236.13	266.33	314.029	218.482	631.834	279.364
ENSG00000177548	RABEP2	54.0229	-0.379031	0.258098	-1.46856	0.141953	0.983723	47.7919	65.5792	62.2631	68.4849	52.3381	48.16	33.6823	53.8834
ENSG00000229117	RPL41	482.177	0.449287	0.305945	1.46852	0.141963	0.983723	358.439	479.04	421.745	370.008	451.416	389.978	964.012	422.777
ENSG00000131469	RPL27	735.731	0.492407	0.335324	1.46845	0.141981	0.983723	508.187	688.269	633.204	614.461	715.287	529.76	1586.55	610.125
ENSG00000138463	DIRC2	157.235	0.30338	0.206603	1.46842	0.14199	0.983723	132.224	149.271	152.721	127.458	171.553	172.671	216.032	135.952
ENSG00000259345	AC013652.1	18.2133	0.542893	0.369798	1.46808	0.142082	0.983723	12.7445	13.1158	12.9225	19.9747	19.6268	27.0166	22.0677	18.2374
ENSG00000182199	SHMT2	959.675	0.22442	0.152894	1.46781	0.142155	0.983723	831.579	936.846	943.345	827.525	1059.12	947.929	1195.14	935.912
ENSG00000181929	PRKAG1	444.101	0.320614	0.218465	1.46757	0.142221	0.983723	403.045	439.693	341.86	393.788	437.605	404.074	687.584	445.159
ENSG00000159228	CBR1	507.05	0.385475	0.262673	1.46751	0.142238	0.983723	411.01	468.423	425.269	452.761	488.489	422.868	911.746	475.831
ENSG00000134265	NAPG	198.939	-0.34035	0.231983	-1.46714	0.142339	0.983723	232.587	181.123	180.915	293.914	154.107	202.037	195.125	151.702
ENSG00000007255	TRAPPC6A	51.3474	0.551009	0.375658	1.46678	0.142435	0.983723	33.4543	54.337	30.5442	46.6077	51.6112	41.1122	109.177	43.9357
ENSG00000154556	SORBS2	138.482	-0.264865	0.180578	-1.46676	0.142441	0.983723	160.899	147.397	164.469	133.165	137.388	126.86	120.792	116.885
ENSG00000181322	NME9	1.16274	2.5766	1.75736	1.46618	0.1426	0.983723	1.59306	0	0	0	0.726918	1.17463	5.8073	0
ENSG00000232450	AL133517.1	0.962555	-2.59675	1.77132	-1.466	0.142649	0.983723	1.59306	0.624564	0	4.75589	0.726918	0	0	0
ENSG00000130726	TRIM28	428.389	-0.391781	0.267246	-1.466	0.142649	0.983723	434.906	490.283	528.649	491.759	423.793	412.296	192.802	452.62
ENSG00000161381	PLXDC1	1.44827	-2.29279	1.56457	-1.46545	0.142799	0.983723	3.18613	0.624564	5.87388	0	0.726918	1.17463	0	0
ENSG00000174720	LARP7	47.5994	0.483871	0.330238	1.46522	0.142861	0.983723	33.4543	41.8458	37.5928	44.7054	50.8843	39.9375	91.7554	40.6198
ENSG00000235782	AL031429.1	2.35931	1.73859	1.18763	1.46392	0.143217	0.983723	0	1.87369	0	1.90236	1.45384	3.5239	9.29168	0.828975
ENSG00000100442	FKBP3	202.193	0.471438	0.322094	1.46366	0.143286	0.983723	154.527	182.997	162.119	176.919	178.822	152.702	420.449	189.006
ENSG00000111843	TMEM14C	910.38	0.44364	0.30315	1.46343	0.143349	0.983723	694.576	870.017	743.633	776.162	835.229	776.433	1835.11	751.88
ENSG00000188647	PTAR1	66.8672	-0.39369	0.269038	-1.46333	0.143378	0.983723	105.142	54.337	71.6613	75.1431	67.6034	57.557	48.7813	54.7123
ENSG00000184983	NDUFA6	476.328	0.497641	0.34008	1.46331	0.143383	0.983723	350.474	467.798	386.501	373.813	455.051	334.771	1036.02	406.198
ENSG00000151502	VPS26B	186.619	-0.403315	0.275627	-1.46327	0.143395	0.983723	248.518	206.731	200.887	194.992	170.826	213.783	84.7866	172.427
ENSG00000213551	DNAJC9	36.7049	0.477515	0.326474	1.46264	0.143565	0.983723	27.0821	44.9686	22.3207	26.633	44.342	35.239	55.7501	37.3039
ENSG00000125843	AP5S1	75.8242	0.333546	0.22805	1.4626	0.143576	0.983723	71.6879	74.9476	66.9622	55.1684	85.7763	66.9541	90.5939	94.5031
ENSG00000173535	TNFRSF10C	89.7346	-0.348697	0.238419	-1.46254	0.143594	0.983723	89.2116	81.1933	121.002	111.288	77.7802	91.6214	60.3959	85.3844
ENSG00000237550	RPL9P9	28.73	0.594814	0.406853	1.46199	0.143745	0.983723	17.5237	28.7299	28.1946	16.17	31.9844	21.1434	60.3959	25.6982
ENSG00000215006	CHCHD2P2	5.26708	1.12053	0.76646	1.46196	0.143753	0.983723	4.77919	1.24913	7.04866	0.951178	7.9961	3.5239	11.6146	4.97385
ENSG00000228288	PCAT6	8.36857	0.870213	0.59529	1.46183	0.143788	0.983723	1.59306	8.74389	5.87388	6.65825	15.9922	4.69853	15.099	8.28975
ENSG00000104960	PTOV1	90.4316	0.298541	0.204226	1.46182	0.143792	0.983723	76.4671	91.1863	75.1857	79.899	97.407	95.1453	116.146	92.0162
ENSG00000140350	ANP32A	73.0162	0.393275	0.269092	1.46149	0.143881	0.983723	76.4671	72.4494	64.6127	39.9495	93.7724	89.2721	63.8803	83.7264
ENSG00000151665	PIGF	81.5812	0.503746	0.344963	1.46029	0.14421	0.983723	54.1642	79.3196	74.0109	60.8754	63.9688	71.6526	170.735	77.9236
ENSG00000131242	RAB11FIP4	5.36089	1.046	0.716335	1.46021	0.144232	0.983723	3.18613	0.624564	7.04866	3.80471	8.72302	8.22243	4.64584	6.6318
ENSG00000229503	AC092155.2	2.27697	1.61898	1.10899	1.45987	0.144325	0.983723	0	1.87369	1.17478	0.951178	2.90767	2.34927	8.13022	0.828975
ENSG00000256092	AC137767.1	1.92995	1.61876	1.10905	1.45959	0.144403	0.983723	0	0.624564	1.17478	1.90236	2.90767	3.5239	1.16146	4.14487
ENSG00000273350	AC004832.5	1.01543	2.49299	1.70813	1.45949	0.144431	0.983723	0	0	0	0.951178	0	3.5239	1.16146	2.48692
ENSG00000241749	RPSAP52	15.046	0.854786	0.585779	1.45923	0.144502	0.983723	7.96532	13.1158	9.39821	11.4141	10.9038	18.7941	42.974	5.80282
ENSG00000214975	PPIAP29	5.89757	1.17122	0.802716	1.45907	0.144546	0.983723	3.18613	3.12282	1.17478	6.65825	3.63459	3.5239	20.9063	4.97385
ENSG00000139637	C12orf10	99.8402	0.404221	0.277063	1.45895	0.144579	0.983723	93.9908	101.804	66.9622	79.899	98.8609	92.796	170.735	93.6741
ENSG00000112053	SLC26A8	2.12482	2.05896	1.41128	1.45893	0.144585	0.983723	3.18613	0.624564	0	0	2.90767	0	1.16146	9.11872
ENSG00000197451	HNRNPAB	324.462	0.307573	0.210874	1.45857	0.144684	0.983723	270.821	326.022	286.645	274.891	337.29	285.436	485.49	329.103
ENSG00000113732	ATP6V0E1	2622.37	0.407665	0.279561	1.45823	0.144777	0.983723	2137.89	2358.35	2317.83	2201.98	2466.43	2231.8	5008.22	2256.47
ENSG00000196154	S100A4	404.333	0.467516	0.320651	1.45802	0.144835	0.983723	299.496	397.223	346.559	312.938	391.809	288.96	830.444	367.236
ENSG00000235257	ITGA9-AS1	2.5068	-1.35017	0.926146	-1.45784	0.144885	0.983723	4.77919	2.49825	3.52433	3.80471	1.45384	1.17463	1.16146	1.65795
ENSG00000204392	LSM2	68.2327	0.51817	0.355564	1.45732	0.145029	0.983723	62.1295	51.8388	55.2145	55.1684	64.6957	45.8107	146.344	64.66
ENSG00000103266	STUB1	246.222	0.411304	0.282267	1.45714	0.145076	0.983723	211.877	276.057	162.119	194.04	263.871	182.068	411.157	268.588
ENSG00000054965	FAM168A	43.9335	-0.584107	0.400953	-1.45679	0.145173	0.983723	78.0601	35.6001	39.9424	58.9731	34.8921	30.5405	16.2604	57.1993
ENSG00000173660	UQCRH	433.218	0.499776	0.343107	1.45662	0.145222	0.983723	288.345	440.317	367.705	337.668	432.516	335.945	934.975	328.274
ENSG00000124733	MEA1	378.747	0.501672	0.34443	1.45653	0.145247	0.983723	267.635	397.847	260.8	326.254	375.817	265.467	809.538	326.616
ENSG00000164631	ZNF12	146.367	-0.422834	0.29032	-1.45644	0.14527	0.983723	160.899	137.404	191.488	181.675	111.945	152.702	67.3647	167.453
ENSG00000108395	TRIM37	399.721	-0.418834	0.287602	-1.4563	0.145311	0.983723	508.187	430.324	419.395	472.736	394.717	406.423	161.443	404.54
ENSG00000227097	RPS28P7	24.715	0.541355	0.371815	1.45598	0.145398	0.983723	15.9306	24.9825	15.2721	22.8283	24.7152	23.4927	46.4584	24.0403
ENSG00000198805	PNP	125.157	0.445857	0.306231	1.45595	0.145407	0.983723	106.735	120.541	109.254	86.5572	117.761	95.1453	239.261	126.004
ENSG00000102978	POLR2C	183.65	0.384828	0.264396	1.4555	0.145531	0.983723	137.003	171.755	163.294	163.603	209.352	171.496	310.11	142.584
ENSG00000065413	ANKRD44	84.966	-0.42313	0.29073	-1.45541	0.145556	0.983723	127.445	84.3161	65.7874	113.19	71.9649	79.8751	47.6199	89.5293
ENSG00000135272	MDFIC	168.114	-0.322171	0.221403	-1.45514	0.145632	0.983723	245.332	157.39	180.915	165.505	152.653	180.894	131.245	130.978
ENSG00000011566	MAP4K3	309.45	-0.399303	0.274426	-1.45505	0.145656	0.983723	304.275	304.163	364.181	435.64	302.398	347.691	148.667	268.588
ENSG00000144792	ZNF660	1.56626	-1.9472	1.33835	-1.45493	0.145689	0.983723	0	3.74738	2.34955	3.80471	1.45384	1.17463	0	0
ENSG00000146263	MMS22L	30.2084	-0.462502	0.317898	-1.45488	0.145704	0.983723	41.4197	31.2282	37.5928	31.3889	35.619	19.9688	22.0677	22.3823
ENSG00000171806	METTL18	27.6115	0.571293	0.392687	1.45483	0.145717	0.983723	17.5237	26.2317	18.7964	24.7306	24.7152	35.239	54.5886	19.0664
ENSG00000140297	GCNT3	15.3049	-0.67288	0.462536	-1.45476	0.145735	0.983723	17.5237	11.2421	14.0973	32.3401	11.6307	9.39707	16.2604	9.9477
ENSG00000106077	ABHD11	60.5155	0.47942	0.329621	1.45446	0.14582	0.983723	35.0474	62.4564	50.5154	52.3148	61.788	48.16	114.985	58.8572
ENSG00000140577	CRTC3	58.5904	-0.503174	0.34606	-1.45401	0.145943	0.983723	111.514	44.9686	52.8649	67.5337	45.7958	51.6839	31.3594	63.0021
ENSG00000110107	PRPF19	12.4349	-0.738572	0.508057	-1.45372	0.146025	0.983723	25.489	11.2421	19.9712	6.65825	10.1769	5.87317	9.29168	10.7767
ENSG00000178226	PRSS36	2.37126	1.55041	1.06651	1.45372	0.146025	0.983723	0	1.24913	2.34955	0.951178	1.45384	2.34927	8.13022	2.48692
ENSG00000115541	HSPE1	88.2552	0.505495	0.347753	1.4536	0.146056	0.983723	68.5017	79.9442	72.8361	69.436	71.9649	70.478	191.641	81.2395
ENSG00000213058	AL365357.1	11.298	0.727861	0.500849	1.45325	0.146153	0.983723	6.37225	9.99302	9.39821	7.60943	11.6307	8.22243	25.5521	11.6056
ENSG00000102096	PIM2	56.2216	0.377523	0.259787	1.4532	0.146168	0.983723	57.3503	48.0914	32.8937	57.0707	55.2458	64.6048	73.172	61.3441
ENSG00000196466	ZNF799	9.8939	0.845294	0.581701	1.45314	0.146184	0.983723	6.37225	11.2421	8.22343	1.90236	15.2653	12.921	17.4219	5.80282
ENSG00000214026	MRPL23	21.5805	0.655316	0.450969	1.45313	0.146188	0.983723	12.7445	23.1089	12.9225	17.1212	27.6229	14.0956	47.6199	17.4085
ENSG00000089157	RPLP0	1635.3	0.393571	0.270964	1.45248	0.146367	0.983723	1202.76	1649.47	1369.79	1430.57	1713.35	1306.19	2933.85	1476.4
ENSG00000104299	INTS9	95.4813	-0.303219	0.208778	-1.45235	0.146403	0.983723	117.887	99.3056	95.1568	111.288	102.495	75.1765	81.3022	81.2395
ENSG00000162604	TM2D1	229.232	0.453462	0.312402	1.45153	0.146632	0.983723	191.168	214.85	187.964	178.822	200.629	200.862	468.068	191.493
ENSG00000182872	RBM10	117.782	-0.410616	0.282962	-1.45113	0.146743	0.983723	146.562	124.288	125.701	142.677	135.207	112.765	52.2657	102.793
ENSG00000115419	GLS	587.415	-0.395966	0.272876	-1.45108	0.146756	0.983723	758.298	561.483	583.864	767.601	513.931	641.35	277.589	595.204
ENSG00000116353	MECR	131.803	0.364862	0.251483	1.45085	0.146823	0.983723	92.3977	111.797	122.177	133.165	132.299	112.765	211.386	138.439
ENSG00000215252	GOLGA8B	26.9342	-0.625662	0.431259	-1.45078	0.146841	0.983723	38.2335	19.986	37.5928	36.1448	26.1691	25.8419	5.8073	25.6982
ENSG00000169964	TMEM42	158.748	0.408281	0.281534	1.4502	0.147003	0.983723	130.631	139.902	151.546	122.702	158.468	151.528	289.204	126.004
ENSG00000185728	YTHDF3	518.362	-0.425153	0.293194	-1.45008	0.147037	0.983723	685.017	469.047	593.262	630.631	425.247	588.491	223	532.202
ENSG00000147408	CSGALNACT1	7.94799	-1.07529	0.741567	-1.45002	0.147052	0.983723	22.3029	4.99651	3.52433	12.3653	2.18075	11.7463	2.32292	4.14487
ENSG00000177425	PAWR	298.665	-0.274409	0.189302	-1.44958	0.147174	0.983723	320.206	307.91	294.869	384.276	231.887	314.802	236.938	298.431
ENSG00000063854	HAGH	457.554	0.410501	0.283213	1.44945	0.147213	0.983723	379.149	456.556	380.627	353.838	436.151	385.28	861.803	407.027
ENSG00000167797	CDK2AP2	345.678	0.467493	0.322538	1.44942	0.14722	0.983723	224.622	343.51	294.869	295.817	343.105	271.34	706.168	285.996
ENSG00000187118	CMC1	73.2477	0.557544	0.38475	1.44911	0.147308	0.983723	54.1642	58.0844	62.2631	61.8266	59.6073	49.3346	171.896	68.8049
ENSG00000124532	MRS2	143.876	0.309849	0.213838	1.44899	0.14734	0.983723	114.701	144.274	108.079	144.579	153.38	143.305	200.933	141.755
ENSG00000110675	ELMOD1	5.27679	-1.0446	0.720946	-1.44893	0.147356	0.983723	9.55838	4.99651	4.6991	9.51178	5.08843	5.87317	0	2.48692
ENSG00000154040	CABYR	26.403	0.463926	0.320301	1.44841	0.147504	0.983723	25.489	21.2352	19.9712	21.8771	23.2614	31.7151	39.4896	28.1851
ENSG00000243147	MRPL33	224.863	0.454234	0.313668	1.44813	0.14758	0.983723	176.83	211.727	170.342	198.796	207.172	171.496	455.292	207.244
ENSG00000166794	PPIB	414.581	0.414409	0.286228	1.44783	0.147665	0.983723	304.275	410.963	350.083	354.79	416.524	320.675	774.694	384.644
ENSG00000155729	KCTD18	66.4133	0.337783	0.233324	1.4477	0.1477	0.983723	63.7225	65.5792	43.4667	61.8266	83.5956	70.478	69.6876	72.9498
ENSG00000147224	PRPS1	183.637	-0.305509	0.211043	-1.44762	0.147724	0.983723	226.215	202.983	170.342	214.015	173.007	164.449	120.792	197.296
ENSG00000185100	ADSSL1	1.91334	1.71327	1.18362	1.44748	0.147761	0.983723	1.59306	1.87369	0	0	2.18075	3.5239	1.16146	4.97385
ENSG00000119714	GPR68	38.4841	-0.418452	0.289139	-1.44723	0.147831	0.983723	39.8266	33.7264	49.3406	54.2172	37.0728	27.0166	30.198	36.4749
ENSG00000134825	TMEM258	256.386	0.499372	0.345096	1.44705	0.147882	0.983723	186.388	242.955	233.78	185.48	233.341	191.465	562.147	215.533
ENSG00000185760	KCNQ5	34.166	-0.706722	0.488525	-1.44665	0.147996	0.983723	49.385	39.3475	32.8937	48.5101	39.2536	36.4136	3.48438	24.0403
ENSG00000128298	BAIAP2L2	1.31207	-2.28289	1.57836	-1.44637	0.148074	0.983723	1.59306	0.624564	5.87388	0.951178	1.45384	0	0	0
ENSG00000090266	NDUFB2	355.153	0.463919	0.32083	1.446	0.148178	0.983723	259.669	354.128	292.519	286.305	352.555	273.69	730.558	291.799
ENSG00000156239	N6AMT1	79.8426	0.301258	0.20838	1.44571	0.148258	0.983723	74.874	73.074	74.0109	63.729	77.7802	95.1453	96.4012	83.7264
ENSG00000076053	RBM7	123.086	0.346041	0.23945	1.44515	0.148417	0.983723	133.817	95.5582	85.7586	118.897	114.853	135.083	178.865	121.859
ENSG00000185591	SP1	71.0122	-0.55555	0.38452	-1.44479	0.148517	0.983723	74.874	69.3266	115.128	78.9478	61.0611	93.9707	20.9063	53.8834
ENSG00000227359	AC017074.1	3.86828	-1.18435	0.819882	-1.44454	0.148587	0.983723	6.37225	3.12282	3.52433	8.56061	2.18075	4.69853	0	2.48692
ENSG00000086065	CHMP5	636.801	0.407419	0.282041	1.44454	0.148588	0.983723	552.793	586.465	511.027	538.367	536.466	579.094	1214.89	575.308
ENSG00000100316	RPL3	2437.4	0.337415	0.233604	1.44439	0.148631	0.983723	1761.93	2324	2354.25	2172.49	2464.98	2127.26	3940.83	2353.46
ENSG00000235904	RBMS3-AS3	2.96642	1.82266	1.26197	1.4443	0.148655	0.983723	0	1.87369	0	2.85354	0.726918	2.34927	15.099	0.828975
ENSG00000129562	DAD1	1437.15	0.475368	0.329278	1.44367	0.148833	0.983723	1048.24	1355.93	1178.3	1226.07	1303.36	1081.84	3090.65	1212.79
ENSG00000176046	NUPR1	2245.72	0.464257	0.321595	1.44361	0.14885	0.983723	1803.35	2106.03	1910.19	1729.24	2147.32	1684.42	4734.11	1851.1
ENSG00000197774	EME2	4.15008	-1.23962	0.858767	-1.44349	0.148882	0.983723	3.18613	6.8702	7.04866	6.65825	3.63459	0	0	5.80282
ENSG00000272047	GTF2H5	299.474	0.470583	0.326055	1.44326	0.148947	0.983723	270.821	262.941	245.528	224.478	268.233	211.434	627.188	285.167
ENSG00000177494	ZBED2	1.5801	-2.32089	1.60816	-1.4432	0.148965	0.983723	3.18613	0	2.34955	4.75589	0	2.34927	0	0
ENSG00000170860	LSM3	256.61	0.467995	0.324278	1.44319	0.148966	0.983723	207.098	210.478	244.353	198.796	236.975	203.212	538.918	213.046
ENSG00000214253	FIS1	541.792	0.463949	0.321512	1.44302	0.149014	0.983723	395.08	548.367	464.036	412.811	559.727	379.407	1099.9	475.002
ENSG00000155115	GTF3C6	289.086	0.464566	0.321979	1.44284	0.149065	0.983723	242.146	246.078	226.732	255.867	263.871	237.276	608.605	232.113
ENSG00000260032	NORAD	354.402	-0.311331	0.215833	-1.44246	0.149171	0.983723	433.313	294.794	440.541	402.349	274.048	401.725	271.782	316.668
ENSG00000106477	CEP41	95.3898	0.35388	0.245345	1.44238	0.149195	0.983723	90.8046	83.067	62.2631	97.9714	101.042	118.638	128.922	80.4105
ENSG00000170153	RNF150	19.2439	-0.556969	0.386275	-1.4419	0.149331	0.983723	35.0474	18.7369	17.6216	20.9259	15.2653	21.1434	12.7761	12.4346
ENSG00000163472	TMEM79	18.2701	0.523463	0.363044	1.44187	0.149339	0.983723	15.9306	19.3615	12.9225	11.4141	23.2614	21.1434	19.7448	22.3823
ENSG00000145604	SKP2	53.7191	-0.44565	0.309079	-1.44187	0.14934	0.983723	71.6879	59.3336	38.7676	78.9478	50.1574	43.4614	30.198	57.1993
ENSG00000162814	SPATA17	1.42457	2.24346	1.55603	1.44179	0.149362	0.983723	0	0.624564	1.17478	0	1.45384	1.17463	6.96876	0
ENSG00000255400	AC124276.2	1.42457	2.24346	1.55603	1.44179	0.149362	0.983723	0	0.624564	1.17478	0	1.45384	1.17463	6.96876	0
ENSG00000133112	TPT1	520.252	0.428633	0.297314	1.44168	0.149392	0.983723	388.708	485.286	439.366	459.419	529.923	385.28	1008.15	465.884
ENSG00000066855	MTFR1	40.8155	-0.380826	0.264202	-1.44142	0.149466	0.983723	46.1988	38.723	55.2145	45.6566	36.3459	34.0644	31.3594	38.9618
ENSG00000128585	MKLN1	219.33	-0.2328	0.161574	-1.44082	0.149635	0.983723	226.215	221.096	244.353	256.818	218.075	210.259	184.672	193.151
ENSG00000136451	VEZF1	132.369	-0.342473	0.237776	-1.44032	0.149778	0.983723	170.458	120.541	150.371	152.189	128.665	146.829	81.3022	108.596
ENSG00000110367	DDX6	128.601	-0.393086	0.272955	-1.44011	0.149835	0.983723	197.54	141.776	139.798	105.581	98.134	157.401	88.271	100.306
ENSG00000224957	LINC01266	2.06588	-1.95338	1.35643	-1.44009	0.149842	0.983723	0	2.49825	1.17478	9.51178	2.18075	0	1.16146	0
ENSG00000185432	METTL7A	2.05161	1.74283	1.21024	1.44007	0.149848	0.983723	1.59306	1.24913	0	0.951178	5.08843	5.87317	0	1.65795
ENSG00000143653	SCCPDH	292.965	0.365646	0.253957	1.43979	0.149926	0.983723	278.786	268.562	224.382	252.062	337.29	243.149	486.652	252.837
ENSG00000175782	SLC35E3	126.256	0.343463	0.238595	1.43952	0.150002	0.983723	138.597	103.053	103.38	100.825	133.753	143.305	183.511	103.622
ENSG00000168872	DDX19A	53.5677	-0.378016	0.262652	-1.43923	0.150086	0.983723	46.1988	65.5792	70.4866	59.9242	60.3342	39.9375	42.974	43.1067
ENSG00000074842	MYDGF	1366.35	0.407415	0.283093	1.43915	0.150107	0.983723	1088.06	1309.71	1227.64	1071.98	1277.2	1141.74	2601.67	1212.79
ENSG00000225630	MTND2P28	41.1957	0.485598	0.337433	1.43909	0.150124	0.983723	28.6751	30.6036	35.2433	41.8519	37.7997	39.9375	78.9793	36.4749
ENSG00000162631	NTNG1	13.9333	-0.595075	0.41354	-1.43898	0.150157	0.983723	14.3376	17.4878	22.3207	13.3165	14.5384	9.39707	9.29168	10.7767
ENSG00000122912	SLC25A16	61.9194	0.429882	0.298795	1.43872	0.15023	0.983723	52.5711	53.0879	76.3604	29.4865	61.0611	75.1765	69.6876	77.9236
ENSG00000176728	TTTY14	18.5531	0.58808	0.40879	1.43859	0.150267	0.983723	17.5237	13.1158	10.573	18.0724	19.6268	15.2702	36.0053	18.2374
ENSG00000169967	MAP3K2	177.296	-0.485431	0.337439	-1.43857	0.150271	0.983723	248.518	166.759	200.887	212.113	146.111	216.133	60.3959	167.453
ENSG00000198712	MT-CO2	6401.52	0.4096	0.284768	1.43836	0.150332	0.983723	5786.01	5441.2	5577.84	5189.63	5789.18	5662.91	12410.2	5355.18
ENSG00000106305	AIMP2	99.78	0.44538	0.309649	1.43834	0.150339	0.983723	62.1295	96.1828	91.6325	86.5572	100.315	70.478	182.349	108.596
ENSG00000100558	PLEK2	78.0488	0.451408	0.313845	1.43831	0.150345	0.983723	46.1988	81.1933	70.4866	63.729	70.5111	71.6526	145.183	75.4367
ENSG00000084453	SLCO1A2	1.50407	2.06504	1.43599	1.43806	0.150417	0.983723	1.59306	0	1.17478	0	1.45384	1.17463	5.8073	0.828975
ENSG00000138834	MAPK8IP3	25.0871	-0.602361	0.418909	-1.43793	0.150455	0.983723	27.0821	26.8562	25.8451	41.8519	26.896	22.318	5.8073	24.0403
ENSG00000267309	AC092295.2	2.11451	-1.62999	1.13369	-1.43776	0.150501	0.983723	4.77919	4.37195	1.17478	2.85354	2.90767	0	0	0.828975
ENSG00000074657	ZNF532	89.6369	-0.590828	0.411084	-1.43725	0.150648	0.983723	121.073	80.5687	110.429	119.848	65.4226	88.0975	19.7448	111.912
ENSG00000156831	NSMCE2	147.254	0.420431	0.292602	1.43687	0.150755	0.983723	132.224	125.537	125.701	119.848	135.934	116.289	279.912	142.584
ENSG00000243926	TIPARP-AS1	2.78192	1.29132	0.898786	1.43674	0.150793	0.983723	1.59306	2.49825	1.17478	0.951178	2.90767	2.34927	5.8073	4.97385
ENSG00000240898	AC132942.1	1.42038	-2.12927	1.48244	-1.43632	0.15091	0.983723	3.18613	0.624564	2.34955	2.85354	0	2.34927	0	0
ENSG00000256073	URB1-AS1	12.8173	0.628888	0.437847	1.43632	0.150911	0.983723	9.55838	11.8667	8.22343	10.463	20.3537	9.39707	18.5834	14.0926
ENSG00000146267	FAXC	6.08329	0.901661	0.627788	1.43625	0.150931	0.983723	3.18613	4.99651	5.87388	2.85354	7.26918	9.39707	3.48438	11.6056
ENSG00000270504	AL391422.3	2.95828	-1.43256	0.997587	-1.43602	0.150995	0.983723	6.37225	1.24913	2.34955	7.60943	2.90767	2.34927	0	0.828975
ENSG00000183283	DAZAP2	1168.85	0.27773	0.19343	1.43582	0.151055	0.983723	1002.04	1127.96	1106.64	988.274	1157.25	1179.33	1710.83	1078.5
ENSG00000145247	OCIAD2	636.38	0.468544	0.326373	1.43561	0.151113	0.983723	514.56	605.827	521.6	492.71	633.873	468.679	1341.49	512.306
ENSG00000197121	PGAP1	20.872	-0.587641	0.409381	-1.43544	0.151162	0.983723	17.5237	21.2352	22.3207	38.9983	22.5345	21.1434	11.6146	11.6056
ENSG00000103196	CRISPLD2	3.13174	1.38722	0.966568	1.4352	0.15123	0.983723	0	3.12282	2.34955	0.951178	7.26918	7.0478	3.48438	0.828975
ENSG00000269946	AL158152.2	2.5245	1.68926	1.17722	1.43496	0.151298	0.983723	4.77919	0.624564	0	0	1.45384	5.87317	5.8073	1.65795
ENSG00000198715	GLMP	462.691	0.26807	0.186816	1.43494	0.151305	0.983723	375.963	467.798	458.163	376.667	579.354	407.598	560.985	475.002
ENSG00000068024	HDAC4	13.7754	-0.71995	0.501761	-1.43485	0.151331	0.983723	28.6751	11.2421	14.0973	16.17	16.7191	7.0478	4.64584	11.6056
ENSG00000163512	AZI2	137.65	0.361138	0.25171	1.43474	0.151361	0.983723	108.328	144.274	111.604	116.044	154.107	120.987	220.677	125.175
ENSG00000198498	TMA16	56.2476	0.429433	0.299328	1.43466	0.151385	0.983723	47.7919	45.5932	49.3406	48.5101	46.5228	49.3346	99.8856	63.0021
ENSG00000149532	CPSF7	27.1728	-0.432857	0.301868	-1.43393	0.151593	0.983723	30.2682	34.351	32.8937	27.5842	26.1691	23.4927	18.5834	24.0403
ENSG00000115226	FNDC4	886.518	0.386873	0.269891	1.43344	0.151731	0.983723	715.286	821.926	874.033	661.069	909.375	809.322	1586.55	714.576
ENSG00000134248	LAMTOR5	659.3	0.462386	0.322648	1.4331	0.15183	0.983723	546.421	616.444	491.056	563.098	626.603	510.966	1386.78	533.031
ENSG00000235501	AC105942.1	18.5613	0.589994	0.411728	1.43297	0.151866	0.983723	9.55838	24.358	9.39821	14.2677	20.3537	19.9688	23.2292	27.3562
ENSG00000139946	PELI2	22.1643	-0.67392	0.470397	-1.43266	0.151955	0.983723	44.6058	14.365	27.0198	24.7306	18.173	14.0956	6.96876	27.3562
ENSG00000160075	SSU72	780.905	0.386755	0.269956	1.43266	0.151955	0.983723	653.156	771.336	635.554	645.85	732.734	673.065	1430.92	704.628
ENSG00000121440	PDZRN3	19.4539	-0.608929	0.425088	-1.43248	0.152007	0.983723	30.2682	19.3615	21.146	24.7306	23.9883	12.921	5.8073	17.4085
ENSG00000171492	LRRC8D	117.66	-0.297037	0.2075	-1.4315	0.152286	0.983723	133.817	124.913	132.75	128.409	119.942	122.162	78.9793	100.306
ENSG00000080493	SLC4A4	11.2594	-0.637153	0.445246	-1.43101	0.152427	0.983723	12.7445	12.4913	16.4469	13.3165	10.9038	10.5717	6.96876	6.6318
ENSG00000118363	SPCS2	216.745	0.424554	0.296688	1.43098	0.152436	0.983723	207.098	197.987	164.469	170.261	228.979	183.243	411.157	170.769
ENSG00000267871	ZNF460-AS1	1.01293	2.45242	1.71383	1.43096	0.152441	0.983723	0	0	1.17478	0	1.45384	0	4.64584	0.828975
ENSG00000257219	LINC02407	170.313	0.399865	0.279522	1.43053	0.152565	0.983723	148.155	147.397	129.225	161.7	156.287	145.655	312.433	161.65
ENSG00000146828	SLC12A9	18.9049	-0.633756	0.443086	-1.43032	0.152624	0.983723	19.1168	23.1089	25.8451	24.7306	16.7191	8.22243	6.96876	26.5272
ENSG00000101745	ANKRD12	83.3762	0.398146	0.278361	1.43032	0.152625	0.983723	71.6879	81.8178	66.9622	65.6313	74.1457	105.717	134.729	66.318
ENSG00000182774	RPS17	224.605	0.465994	0.325809	1.43026	0.152641	0.983723	143.376	226.092	199.712	183.577	214.441	178.544	458.777	192.322
ENSG00000133065	SLC41A1	161.245	-0.597861	0.418117	-1.42989	0.152749	0.983723	251.704	135.53	195.013	195.943	176.641	155.052	32.5209	147.557
ENSG00000168060	NAALADL1	4.94127	1.17761	0.823652	1.42974	0.152792	0.983723	0	2.49825	2.34955	6.65825	6.54226	7.0478	12.7761	1.65795
ENSG00000235034	C19orf81	2.09633	1.50193	1.05065	1.42953	0.152853	0.983723	0	1.87369	1.17478	0.951178	3.63459	1.17463	4.64584	3.3159
ENSG00000095906	NUBP2	313.005	0.408853	0.286014	1.42949	0.152864	0.983723	207.098	313.531	287.82	265.379	338.744	271.34	565.631	254.495
ENSG00000185088	RPS27L	1386.98	0.437713	0.306227	1.42938	0.152896	0.983723	1201.17	1172.93	1123.09	1214.65	1236.49	1152.32	2842.09	1153.1
ENSG00000136933	RABEPK	237.903	0.360318	0.252136	1.42906	0.152986	0.983723	176.83	252.324	209.11	193.089	274.775	220.831	379.797	196.467
ENSG00000104823	ECH1	153.067	0.464688	0.325183	1.42901	0.153003	0.983723	111.514	166.759	102.205	132.214	152.653	116.289	301.98	140.926
ENSG00000150967	ABCB9	25.5161	-0.658825	0.461038	-1.429	0.153003	0.983723	30.2682	34.351	39.9424	20.9259	18.173	23.4927	4.64584	32.33
ENSG00000110330	BIRC2	292.502	-0.251973	0.176338	-1.42892	0.153027	0.983723	337.729	292.296	319.539	323.401	250.787	308.929	217.193	290.141
ENSG00000169429	CXCL8	382.502	0.666334	0.466352	1.42882	0.153055	0.983723	237.366	285.426	284.296	374.764	291.494	247.848	1115	223.823
ENSG00000164031	DNAJB14	155.532	-0.317816	0.222454	-1.42868	0.153096	0.983723	210.284	128.66	183.265	170.261	125.03	158.576	117.307	150.873
ENSG00000035681	NSMAF	316.722	-0.257724	0.180412	-1.42853	0.153139	0.983723	399.859	294.17	352.433	336.717	323.479	286.611	240.422	300.089
ENSG00000170584	NUDCD2	154.639	0.436449	0.305534	1.42848	0.153154	0.983723	117.887	149.895	128.051	128.409	123.576	124.511	297.334	167.453
ENSG00000125691	RPL23	406.684	0.406964	0.284938	1.42825	0.153219	0.983723	309.054	377.861	339.51	370.96	389.628	311.278	763.079	392.105
ENSG00000056097	ZFR	650.2	-0.241261	0.168929	-1.42818	0.15324	0.983723	712.099	653.918	765.954	686.751	606.25	700.081	479.683	596.862
ENSG00000182117	NOP10	742.21	0.447005	0.313052	1.42789	0.153322	0.983723	567.131	706.382	630.855	606.852	696.388	560.3	1521.51	648.258
ENSG00000182512	GLRX5	212.497	0.395419	0.276931	1.42786	0.153332	0.983723	165.679	187.369	176.216	203.552	195.541	183.243	390.251	198.125
ENSG00000247934	AC022364.1	6.43782	1.27719	0.894533	1.42777	0.153357	0.983723	1.59306	6.8702	0	5.70707	7.26918	17.6195	11.6146	0.828975
ENSG00000161016	RPL8	1596.05	0.43854	0.30719	1.42759	0.153411	0.983723	1145.41	1553.91	1369.79	1350.67	1605.04	1164.06	3171.95	1407.6
ENSG00000181904	C5orf24	421.476	-0.365148	0.255908	-1.42687	0.153616	0.983723	541.642	344.135	429.968	583.072	323.479	499.219	270.62	379.67
ENSG00000232973	CYP1B1-AS1	2.18714	1.75879	1.23278	1.42669	0.15367	0.983723	0	2.49825	0	0.951178	0.726918	4.69853	1.16146	7.46077
ENSG00000012963	UBR7	97.9298	-0.415055	0.29111	-1.42577	0.153936	0.983723	156.12	86.1898	112.778	94.1667	85.0494	116.289	55.7501	77.0946
ENSG00000168386	FILIP1L	357.974	-0.332618	0.233321	-1.42558	0.153989	0.983723	385.521	386.605	404.123	420.421	309.667	387.629	195.125	374.697
ENSG00000255495	AC145124.1	2.46339	1.54893	1.0869	1.4251	0.154129	0.983723	1.59306	3.12282	0	0	5.81535	4.69853	1.16146	3.3159
ENSG00000215156	AC138409.1	1.92458	-1.99316	1.39864	-1.42507	0.154137	0.983723	6.37225	1.24913	4.6991	0	0.726918	2.34927	0	0
ENSG00000053372	MRTO4	139.765	0.455747	0.319847	1.42489	0.154189	0.983723	97.1769	153.018	122.177	97.0202	119.215	145.655	269.459	114.399
ENSG00000142546	NOSIP	293.864	0.434846	0.305194	1.42482	0.154209	0.983723	191.168	297.292	269.024	240.648	353.282	207.91	535.433	256.153
ENSG00000172602	RND1	1.79073	-1.64765	1.1565	-1.42469	0.154248	0.983723	3.18613	1.87369	2.34955	3.80471	1.45384	0	0	1.65795
ENSG00000239900	ADSL	7.94921	-0.788632	0.553552	-1.42468	0.154251	0.983723	9.55838	10.6176	7.04866	12.3653	4.36151	5.87317	10.4531	3.3159
ENSG00000103260	METRN	247.753	0.291943	0.204967	1.42434	0.154348	0.983723	186.388	275.433	210.285	216.869	296.583	214.958	305.464	276.049
ENSG00000185298	CCDC137	121.542	0.281686	0.197792	1.42415	0.154402	0.983723	93.9908	126.786	119.827	97.0202	147.564	131.559	125.438	130.149
ENSG00000135404	CD63	7791.41	0.413157	0.290125	1.42406	0.154428	0.983723	6463.06	7011.35	6688	6569.79	7339.69	6361.81	15279	6618.53
ENSG00000100321	SYNGR1	69.8678	0.377293	0.264975	1.42388	0.154481	0.983723	49.385	64.3301	66.9622	60.8754	66.1496	66.9541	113.823	70.4628
ENSG00000130349	C6orf203	90.8551	0.57609	0.404658	1.42365	0.154549	0.983723	68.5017	76.8213	70.4866	75.1431	82.1418	63.4302	226.485	63.831
ENSG00000180855	ZNF443	10.764	0.78813	0.553687	1.42342	0.154614	0.983723	4.77919	10.6176	10.573	4.75589	11.6307	25.8419	10.4531	7.46077
ENSG00000164932	CTHRC1	328.23	0.454789	0.319567	1.42314	0.154695	0.983723	262.856	306.036	244.353	292.963	285.679	297.182	680.616	256.153
ENSG00000236013	AL138737.1	1.6376	-1.86776	1.31247	-1.42309	0.15471	0.983723	3.18613	2.49825	4.6991	0	0.726918	0	1.16146	0.828975
ENSG00000205629	LCMT1	168.464	0.421689	0.296331	1.42303	0.154727	0.983723	141.783	163.636	131.575	137.921	178.822	139.781	318.24	135.952
ENSG00000129696	TTI2	85.5108	0.395791	0.278167	1.42286	0.154778	0.983723	81.2462	76.1968	65.7874	71.3384	85.7763	102.193	139.375	62.1731
ENSG00000184924	PTRHD1	61.5005	0.469899	0.330282	1.42272	0.154818	0.983723	36.6405	52.4634	57.564	58.0219	53.065	59.9063	119.63	54.7123
ENSG00000138442	WDR12	197.661	0.335624	0.235909	1.42268	0.154828	0.983723	197.54	188.618	184.44	128.409	194.814	194.989	298.495	193.98
ENSG00000120697	ALG5	286.182	0.382179	0.268689	1.42239	0.154914	0.983723	226.215	271.061	252.577	242.551	268.96	257.245	518.011	252.837
ENSG00000198939	ZFP2	1.62039	2.423	1.70348	1.42238	0.154916	0.983723	1.59306	0.624564	0	0	1.45384	0	9.29168	0
ENSG00000114999	TTL	379.235	-0.481461	0.338523	-1.42224	0.154956	0.983723	441.279	383.482	506.328	437.542	351.828	412.296	117.307	383.815
ENSG00000204381	LAYN	102.351	0.282166	0.198451	1.42184	0.155072	0.983723	84.4324	104.927	83.4091	95.1178	117.034	101.018	124.276	108.596
ENSG00000100417	PMM1	159.735	0.373666	0.262816	1.42178	0.155091	0.983723	127.445	144.274	166.818	117.946	195.541	118.638	249.714	157.505
ENSG00000259867	AC105411.1	2.38896	1.54427	1.08618	1.42175	0.1551	0.983723	0	3.12282	1.17478	0	3.63459	5.87317	1.16146	4.14487
ENSG00000088448	ANKRD10	83.9651	-0.308143	0.21683	-1.42113	0.15528	0.983723	108.328	91.1863	72.8361	99.8737	74.1457	66.9541	81.3022	77.0946
ENSG00000168283	BMI1	98.7874	-0.346429	0.243822	-1.42083	0.155367	0.983723	116.294	75.5722	121.002	130.311	82.8687	103.368	81.3022	79.5816
ENSG00000277161	PIGW	67.544	0.368256	0.25922	1.42063	0.155424	0.983723	78.0601	46.8423	46.991	65.6313	74.8726	91.6214	65.0418	71.2918
ENSG00000138495	COX17	109.256	0.571645	0.402436	1.42046	0.155473	0.983723	66.9087	106.176	81.0595	96.069	105.403	63.4302	261.329	93.6741
ENSG00000198938	MT-CO3	5042.52	0.410042	0.288683	1.42039	0.155494	0.983723	4110.1	4180.83	4574.58	4456.27	4408.76	4523.51	9860.8	4225.28
ENSG00000060642	PIGV	351.662	0.298744	0.210384	1.42	0.155609	0.983723	336.136	315.405	281.946	327.205	346.013	347.691	533.11	325.787
ENSG00000170892	TSEN34	555.855	0.310386	0.218586	1.41997	0.155615	0.983723	422.162	546.493	512.202	502.222	572.812	489.822	854.835	546.294
ENSG00000008018	PSMB1	1511.44	0.437362	0.308011	1.41996	0.15562	0.983723	1226.66	1313.46	1306.35	1288.85	1367.33	1179.33	3102.26	1307.29
ENSG00000122026	RPL21	506.627	0.456671	0.321686	1.41962	0.155719	0.983723	374.37	456.556	431.143	445.152	503.754	366.486	1051.12	424.435
ENSG00000127561	SYNGR3	33.6023	0.474564	0.334316	1.41951	0.155751	0.983723	25.489	33.1019	28.1946	24.7306	38.5267	29.3658	60.3959	29.0141
ENSG00000229720	AL109924.2	4.70679	1.33189	0.938294	1.41948	0.155759	0.983723	0	4.37195	5.87388	0	5.81535	2.34927	15.099	4.14487
ENSG00000051523	CYBA	185.824	0.425291	0.299641	1.41933	0.155802	0.983723	151.341	191.116	138.624	152.189	201.356	135.083	346.115	170.769
ENSG00000185250	PPIL6	9.28501	0.888075	0.625721	1.41928	0.155817	0.983723	1.59306	9.99302	4.6991	8.56061	13.8114	10.5717	20.9063	4.14487
ENSG00000267508	ZNF285	29.9691	0.572429	0.403341	1.41922	0.155835	0.983723	30.2682	20.6106	19.9712	25.6818	28.3498	65.7795	20.9063	28.1851
ENSG00000170889	RPS9	364.723	0.454754	0.32053	1.41876	0.15597	0.983723	229.401	363.496	328.937	307.231	351.101	270.166	731.72	335.735
ENSG00000183617	MRPL54	130.956	0.553114	0.38986	1.41875	0.155972	0.983723	95.5838	142.401	93.9821	91.3131	132.299	90.4468	305.464	96.1611
ENSG00000138190	EXOC6	67.4707	-0.358592	0.252755	-1.41873	0.155977	0.983723	68.5017	60.5827	88.1082	86.5572	56.6996	44.6361	70.8491	63.831
ENSG00000170315	UBB	471.695	0.457036	0.32217	1.41862	0.15601	0.983723	377.556	473.419	370.054	368.106	476.131	347.691	970.981	389.618
ENSG00000149932	TMEM219	581.117	0.364301	0.256814	1.41854	0.156033	0.983723	455.616	585.216	493.406	496.515	589.531	487.473	1008.15	533.031
ENSG00000165264	NDUFB6	392.103	0.49597	0.349681	1.41835	0.156089	0.983723	329.764	372.865	272.548	325.303	367.094	260.769	865.288	343.196
ENSG00000168002	POLR2G	478.243	0.471023	0.332121	1.41823	0.156124	0.983723	426.941	429.7	381.802	364.301	428.882	355.914	1031.38	407.027
ENSG00000114125	RNF7	691.811	0.429236	0.302663	1.4182	0.156133	0.983723	527.304	660.788	574.465	594.487	638.234	566.173	1384.46	588.572
ENSG00000024862	CCDC28A	51.0221	0.518931	0.365977	1.41793	0.156211	0.983723	43.0127	46.2177	34.0685	43.7542	55.2458	36.4136	108.016	41.4487
ENSG00000177030	DEAF1	271.773	0.241814	0.170587	1.41754	0.156326	0.983723	221.436	277.931	251.402	243.502	312.575	260.769	332.178	274.391
ENSG00000152104	PTPN14	163.652	-0.293875	0.207322	-1.41748	0.156344	0.983723	157.713	165.509	200.887	196.894	150.472	176.195	111.5	150.044
ENSG00000104872	PIH1D1	184.19	0.417414	0.294522	1.41726	0.156407	0.983723	130.631	187.994	139.798	170.261	163.557	173.846	344.954	162.479
ENSG00000140319	SRP14	2473.8	0.413812	0.292085	1.41675	0.156555	0.983723	2163.38	2189.72	2058.21	2073.57	2318.14	1998.05	4868.84	2120.52
ENSG00000182628	SKA2	84.3988	0.360711	0.254635	1.41658	0.156605	0.983723	63.7225	84.3161	68.137	77.0455	77.7802	98.6692	130.084	75.4367
ENSG00000235194	PPP1R3E	6.46255	0.859062	0.606471	1.41649	0.156631	0.983723	6.37225	3.74738	4.6991	3.80471	6.54226	14.0956	5.8073	6.6318
ENSG00000164743	C8orf48	23.8765	0.578888	0.408725	1.41633	0.15668	0.983723	25.489	18.1123	12.9225	19.9747	20.3537	23.4927	49.9428	20.7244
ENSG00000102393	GLA	300.96	0.402477	0.284289	1.41573	0.156854	0.983723	216.657	289.798	274.898	253.965	287.133	249.022	560.985	275.22
ENSG00000135837	CEP350	91.1062	-0.341	0.240953	-1.41521	0.157006	0.983723	121.073	92.4354	105.73	90.362	98.8609	83.399	55.7501	81.2395
ENSG00000270503	YTHDF2P1	5.38197	-0.900039	0.63611	-1.41491	0.157095	0.983723	6.37225	4.99651	8.22343	8.56061	2.90767	4.69853	2.32292	4.97385
ENSG00000136449	MYCBPAP	1.50086	-1.91267	1.3522	-1.41449	0.157217	0.983723	1.59306	1.24913	1.17478	5.70707	1.45384	0	0	0.828975
ENSG00000221916	C19orf73	2.04847	2.33962	1.65425	1.4143	0.157273	0.983723	0	1.24913	1.17478	0	0	2.34927	11.6146	0
ENSG00000260822	AC004656.1	2.03097	-1.713	1.21132	-1.41416	0.157315	0.983723	3.18613	2.49825	0	6.65825	0.726918	2.34927	0	0.828975
ENSG00000125877	ITPA	161.538	0.474373	0.335499	1.41393	0.157382	0.983723	90.8046	182.373	129.225	136.019	158.468	149.178	319.402	126.833
ENSG00000235899	LINC01564	0.925357	2.26816	1.60427	1.41383	0.157413	0.983723	0	0	1.17478	0	0.726918	2.34927	2.32292	0.828975
ENSG00000182325	FBXL6	42.4315	0.402303	0.284624	1.41345	0.157522	0.983723	39.8266	42.4703	34.0685	30.4377	53.065	37.5883	40.6511	61.3441
ENSG00000090263	MRPS33	121.339	0.493517	0.349176	1.41337	0.157546	0.983723	78.0601	142.401	95.1568	85.6061	121.395	90.4468	247.391	110.254
ENSG00000113749	HRH2	3.02755	-1.28565	0.909678	-1.4133	0.157567	0.983723	3.18613	4.37195	7.04866	2.85354	1.45384	0	1.16146	4.14487
ENSG00000111196	MAGOHB	82.0128	0.422057	0.298679	1.41308	0.157632	0.983723	57.3503	78.695	76.3604	66.5825	77.7802	65.7795	149.828	83.7264
ENSG00000181481	RNF135	101.97	0.303096	0.214535	1.4128	0.157713	0.983723	87.6185	108.674	89.283	77.9966	104.676	102.193	135.891	109.425
ENSG00000237973	MTCO1P12	10.2543	0.756944	0.535837	1.41264	0.157762	0.983723	6.37225	11.8667	3.52433	7.60943	10.9038	10.5717	22.0677	9.11872
ENSG00000068878	PSME4	94.9608	-0.38552	0.272986	-1.41224	0.15788	0.983723	105.142	88.0635	95.1568	142.677	90.8648	96.3199	51.1042	90.3582
ENSG00000104067	TJP1	428.064	-0.569549	0.403329	-1.41212	0.157915	0.983723	587.84	332.268	608.534	518.392	347.467	458.107	101.047	470.858
ENSG00000166452	AKIP1	298.841	0.383665	0.271714	1.41202	0.157945	0.983723	246.925	261.068	263.15	265.379	318.39	236.101	537.756	261.956
ENSG00000129518	EAPP	255.429	0.439787	0.311522	1.41174	0.158028	0.983723	219.843	249.201	227.907	169.31	260.237	224.355	499.428	193.151
ENSG00000116525	TRIM62	17.0566	-0.63543	0.450107	-1.41173	0.15803	0.983723	23.896	26.2317	10.573	21.8771	13.8114	22.318	6.96876	10.7767
ENSG00000204386	NEU1	839.614	0.245053	0.173603	1.41157	0.158076	0.983723	710.506	787.575	785.925	788.527	861.398	752.94	1134.75	895.293
ENSG00000131153	GINS2	11.9305	0.772917	0.547733	1.41112	0.158209	0.983723	11.1514	8.74389	10.573	4.75589	11.6307	12.921	29.0365	6.6318
ENSG00000282386	AL358472.4	1.67295	1.85619	1.31548	1.41103	0.158235	0.983723	1.59306	1.24913	0	0	0.726918	2.34927	5.8073	1.65795
ENSG00000119778	ATAD2B	21.1911	-0.56802	0.402575	-1.41097	0.158254	0.983723	22.3029	23.7334	35.2433	20.9259	26.1691	16.4449	8.13022	16.5795
ENSG00000101391	CDK5RAP1	128.783	0.374514	0.265477	1.41072	0.158327	0.983723	84.4324	126.162	110.429	125.556	133.753	108.066	212.547	129.32
ENSG00000238227	TMEM250	326.689	-0.274686	0.194725	-1.41063	0.158353	0.983723	353.66	337.264	368.88	371.911	308.94	341.818	210.224	320.813
ENSG00000274270	AL137060.1	0.845918	-2.28822	1.62219	-1.41057	0.15837	0.983723	1.59306	1.87369	1.17478	0.951178	0	1.17463	0	0
ENSG00000253767	PCDHGA8	1.35277	-2.28589	1.62081	-1.41034	0.158439	0.983723	1.59306	0.624564	7.04866	0	0.726918	0	0	0.828975
ENSG00000137106	GRHPR	517.764	0.389284	0.276035	1.41027	0.158459	0.983723	372.777	515.89	440.541	462.273	543.735	415.82	932.652	458.423
ENSG00000175592	FOSL1	268.162	0.266133	0.188721	1.41019	0.158483	0.983723	237.366	241.082	222.033	272.037	265.325	271.34	371.667	264.443
ENSG00000122861	PLAU	1019.29	0.310249	0.220017	1.41012	0.158505	0.983723	885.743	891.877	970.365	891.254	976.251	1037.2	1617.91	883.687
ENSG00000101447	FAM83D	2.4252	-1.40917	0.999439	-1.40996	0.158551	0.983723	4.77919	3.12282	4.6991	1.90236	2.90767	0	1.16146	0.828975
ENSG00000116198	CEP104	97.0614	-0.296643	0.210441	-1.40963	0.15865	0.983723	101.956	109.299	102.205	115.093	89.4109	68.1287	85.9481	104.451
ENSG00000129028	THAP10	17.68	0.569458	0.404005	1.40953	0.158678	0.983723	9.55838	15.6141	22.3207	9.51178	26.1691	18.7941	16.2604	23.2113
ENSG00000174705	SH3PXD2B	55.7319	-0.489215	0.347135	-1.40929	0.158749	0.983723	78.0601	49.9651	82.2343	51.3636	50.1574	63.4302	20.9063	49.7385
ENSG00000168090	COPS6	1004.48	0.387318	0.274844	1.40923	0.158767	0.983723	866.627	964.951	868.159	780.918	966.074	845.736	1862.98	880.371
ENSG00000118420	UBE3D	21.2297	0.554818	0.393705	1.40922	0.15877	0.983723	14.3376	13.1158	16.4469	24.7306	16.7191	19.9688	31.3594	33.159
ENSG00000166889	PATL1	32.942	-0.438854	0.311462	-1.40901	0.158831	0.983723	50.978	33.1019	38.7676	30.4377	35.619	28.1912	23.2292	23.2113
ENSG00000171953	ATPAF2	73.7133	0.366994	0.260491	1.40886	0.158878	0.983723	62.1295	69.3266	62.2631	62.7778	79.961	68.1287	119.63	65.489
ENSG00000160325	CACFD1	54.7581	-0.478747	0.339955	-1.40826	0.159053	0.983723	60.5364	63.7055	85.7586	44.7054	44.342	74.0019	30.198	34.8169
ENSG00000182903	ZNF721	31.7839	-0.644644	0.457786	-1.40818	0.159079	0.983723	62.1295	31.2282	38.7676	23.7795	19.6268	39.9375	8.13022	30.6721
ENSG00000079335	CDC14A	8.57216	-0.822506	0.584135	-1.40808	0.159108	0.983723	7.96532	12.4913	17.6216	5.70707	9.44994	7.0478	5.8073	2.48692
ENSG00000104154	SLC30A4	72.5218	-0.322323	0.228923	-1.408	0.159131	0.983723	84.4324	64.9546	82.2343	92.2643	66.1496	63.4302	54.5886	72.1208
ENSG00000105254	TBCB	610.196	0.440357	0.312756	1.40799	0.159134	0.983723	450.837	583.343	533.348	502.222	636.78	486.298	1225.34	463.397
ENSG00000264577	AC010761.1	0.871702	-2.40381	1.70748	-1.40781	0.159187	0.983723	0	2.49825	2.34955	0.951178	0	1.17463	0	0
ENSG00000169242	EFNA1	3.07187	-1.61143	1.14468	-1.40775	0.159205	0.983723	6.37225	6.24564	2.34955	3.80471	0	0	0	5.80282
ENSG00000178980	SELENOW	470.137	0.454202	0.322739	1.40734	0.159328	0.983723	332.95	445.314	402.948	404.251	450.689	353.565	976.788	394.592
ENSG00000213362	FTH1P12	5.38289	1.13209	0.804582	1.40705	0.159413	0.983723	3.18613	1.24913	2.34955	6.65825	5.81535	7.0478	15.099	1.65795
ENSG00000132432	SEC61G	492.809	0.471716	0.335276	1.40695	0.159443	0.983723	366.405	495.904	407.647	380.471	455.051	346.517	1051.12	439.357
ENSG00000184076	UQCR10	500.737	0.44431	0.315804	1.40692	0.159452	0.983723	385.521	471.546	433.492	405.202	481.947	360.612	1023.25	444.33
ENSG00000276256	AC011043.1	79.0338	0.315737	0.224496	1.40643	0.159598	0.983723	60.5364	83.6915	64.6127	70.3872	86.5033	99.8438	92.9168	73.7787
ENSG00000253305	PCDHGB6	1.86806	-1.82186	1.29582	-1.40595	0.15974	0.983723	0	1.87369	2.34955	7.60943	1.45384	0	0	1.65795
ENSG00000156232	WHAMM	13.8034	0.595259	0.423448	1.40574	0.1598	0.983723	14.3376	8.74389	9.39821	12.3653	21.0806	18.7941	11.6146	14.0926
ENSG00000135723	FHOD1	14.0713	0.587132	0.417676	1.40571	0.15981	0.983723	7.96532	9.99302	16.4469	10.463	17.446	14.0956	22.0677	14.0926
ENSG00000156482	RPL30	74.8176	0.500084	0.355892	1.40516	0.159975	0.983723	43.0127	81.8178	63.4379	58.0219	85.7763	49.3346	147.505	69.6339
ENSG00000114784	EIF1B	210.039	0.463822	0.330104	1.40508	0.159997	0.983723	175.237	207.355	180.915	141.726	220.983	185.592	425.094	143.413
ENSG00000158042	MRPL17	371.592	0.441452	0.314237	1.40484	0.160069	0.983723	275.6	370.991	314.84	297.719	358.371	298.357	752.626	304.234
ENSG00000122432	SPATA1	0.942644	-2.4247	1.72597	-1.40483	0.160071	0.983723	1.59306	1.24913	3.52433	0	0	1.17463	0	0
ENSG00000173421	CCDC36	9.02002	1.0584	0.753519	1.40461	0.160136	0.983723	11.1514	5.62107	3.52433	3.80471	20.3537	15.2702	0	12.4346
ENSG00000157450	RNF111	145.986	-0.559	0.397988	-1.40457	0.16015	0.983723	135.41	118.667	202.061	239.697	122.849	180.894	40.6511	127.662
ENSG00000163754	GYG1	321.202	0.349145	0.248586	1.40452	0.160163	0.983723	269.228	309.159	319.539	231.136	336.563	294.833	527.303	281.851
ENSG00000010818	HIVEP2	34.5059	-0.578769	0.412214	-1.40405	0.160304	0.983723	44.6058	36.8493	42.2919	42.803	34.8921	27.0166	6.96876	40.6198
ENSG00000198888	MT-ND1	1019.27	0.408791	0.291176	1.40393	0.160341	0.983723	831.579	824.424	950.394	896.01	920.278	892.721	1990.74	848.041
ENSG00000131871	SELENOS	461.51	0.411499	0.293108	1.40391	0.160345	0.983723	377.556	420.331	378.278	407.104	422.339	385.28	902.455	398.737
ENSG00000151458	ANKRD50	106.041	-0.645807	0.460076	-1.4037	0.160409	0.983723	151.341	95.5582	131.575	139.823	81.4148	117.463	15.099	116.056
ENSG00000162065	TBC1D24	10.9896	-0.705184	0.502516	-1.40331	0.160526	0.983723	19.1168	11.2421	14.0973	10.463	5.81535	12.921	3.48438	10.7767
ENSG00000027697	IFNGR1	586.877	0.282819	0.201542	1.40327	0.160535	0.983723	516.153	548.992	459.337	591.633	501.574	617.857	832.767	626.705
ENSG00000105289	TJP3	1.2978	-2.05731	1.46615	-1.40321	0.160555	0.983723	4.77919	0.624564	1.17478	1.90236	0.726918	1.17463	0	0
ENSG00000183726	TMEM50A	995.267	0.361519	0.257683	1.40296	0.160629	0.983723	831.579	927.477	834.091	890.303	1002.42	886.848	1759.61	829.804
ENSG00000128272	ATF4	1117.11	0.352808	0.251502	1.40281	0.160674	0.983723	852.289	1087.37	999.734	983.519	1122.36	977.295	1924.54	989.796
ENSG00000123119	NECAB1	27.2679	-0.451072	0.321711	-1.4021	0.160884	0.983723	31.8613	26.2317	36.4181	32.3401	27.6229	27.0166	15.099	21.5533
ENSG00000000419	DPM1	273.784	0.419939	0.299555	1.40188	0.160952	0.983723	272.414	257.945	209.11	196.894	266.779	241.974	523.819	221.336
ENSG00000163510	CWC22	97.9786	-0.348023	0.248274	-1.40177	0.160984	0.983723	138.597	83.6915	102.205	115.093	66.8765	89.2721	106.854	81.2395
ENSG00000259330	INAFM2	70.9331	-0.57431	0.409719	-1.40172	0.160999	0.983723	105.142	58.0844	88.1082	89.4108	68.3303	72.8273	15.099	70.4628
ENSG00000080345	RIF1	101.546	-0.43345	0.309234	-1.40169	0.161008	0.983723	130.631	94.9337	117.478	124.604	89.4109	120.987	40.6511	93.6741
ENSG00000153721	CNKSR3	36.4243	-0.399706	0.285168	-1.40165	0.161019	0.983723	39.8266	36.8493	35.2433	53.266	29.0767	37.5883	31.3594	28.1851
ENSG00000142686	C1orf216	411.878	-0.215837	0.153992	-1.40161	0.161031	0.983723	433.313	404.717	453.463	479.394	398.351	424.043	346.115	355.63
ENSG00000112981	NME5	17.9956	-0.626673	0.447193	-1.40135	0.161111	0.983723	30.2682	18.7369	17.6216	20.9259	15.9922	9.39707	24.3907	6.6318
ENSG00000257621	PSMA3-AS1	27.2709	0.514524	0.36717	1.40132	0.161118	0.983723	35.0474	20.6106	19.9712	15.2189	29.8036	27.0166	46.4584	24.0403
ENSG00000250535	STK19B	4.88368	0.968792	0.691363	1.40128	0.161131	0.983723	0	4.37195	2.34955	5.70707	7.9961	5.87317	6.96876	5.80282
ENSG00000113391	FAM172A	135.873	-0.295142	0.210631	-1.40123	0.161146	0.983723	164.086	131.783	146.847	157.896	117.034	128.035	92.9168	148.386
ENSG00000115457	IGFBP2	1516.09	0.25616	0.182819	1.40117	0.161165	0.983723	1260.11	1564.53	1429.7	1270.77	1582.5	1443.62	2095.27	1482.21
ENSG00000198276	UCKL1	136.558	0.326604	0.233202	1.40052	0.161359	0.983723	111.514	144.899	130.4	97.0202	167.918	115.114	184.672	140.926
ENSG00000174628	IQCK	16.9357	0.63059	0.450362	1.40018	0.161458	0.983723	6.37225	14.365	9.39821	21.8771	24.7152	17.6195	27.875	13.2636
ENSG00000241945	PWP2	11.9145	-0.642538	0.45909	-1.39959	0.161636	0.983723	12.7445	9.99302	19.9712	16.17	11.6307	8.22243	5.8073	10.7767
ENSG00000182752	PAPPA	858.547	-0.404313	0.288883	-1.39957	0.161641	0.983723	1103.99	804.438	1091.37	914.083	809.06	907.992	361.214	876.226
ENSG00000198205	ZXDA	8.3299	-0.774357	0.553287	-1.39956	0.161645	0.983723	15.9306	8.11933	9.39821	9.51178	10.1769	5.87317	3.48438	4.14487
ENSG00000196911	KPNA5	33.5849	0.480637	0.343635	1.39869	0.161907	0.983723	38.2335	17.4878	25.8451	32.3401	47.2497	46.9853	29.0365	31.501
ENSG00000210196	MT-TP	128.366	0.473799	0.338774	1.39857	0.161942	0.983723	100.363	106.8	111.604	110.337	120.668	92.796	274.105	110.254
ENSG00000135390	ATP5MC2	481.134	0.427178	0.305482	1.39837	0.162001	0.983723	356.846	462.177	421.745	399.495	465.228	360.612	953.559	429.409
ENSG00000138061	CYP1B1	254.74	-0.39905	0.285383	-1.3983	0.162024	0.983723	315.427	226.717	279.597	338.62	212.26	252.546	118.469	294.286
ENSG00000137100	DCTN3	417.885	0.446841	0.31961	1.39808	0.162089	0.983723	344.102	402.844	344.209	322.45	396.17	320.675	865.288	347.34
ENSG00000105928	GSDME	434.51	0.230468	0.164859	1.39797	0.162121	0.983723	420.569	404.093	407.647	367.155	470.316	436.964	559.824	409.513
ENSG00000187534	PRR13P5	4.06657	1.1148	0.797558	1.39777	0.162182	0.983723	1.59306	1.24913	4.6991	2.85354	4.36151	2.34927	10.4531	4.97385
ENSG00000130305	NSUN5	55.4783	0.372763	0.266684	1.39777	0.162183	0.983723	35.0474	59.9581	52.8649	43.7542	71.238	57.557	72.0105	51.3964
ENSG00000111364	DDX55	56.1099	0.417775	0.29896	1.39743	0.162286	0.983723	50.978	59.9581	44.6415	36.1448	61.788	41.1122	87.1095	67.1469
ENSG00000157168	NRG1	92.8198	-0.33493	0.239733	-1.39709	0.162385	0.983723	124.259	77.4459	91.6325	121.751	73.4187	96.3199	78.9793	78.7526
ENSG00000163882	POLR2H	192.689	0.392731	0.281278	1.39624	0.162643	0.983723	122.666	197.362	159.77	184.529	215.168	158.576	331.016	172.427
ENSG00000183775	KCTD16	76.5294	-0.525104	0.376139	-1.39604	0.162704	0.983723	109.921	67.4529	105.73	79.899	66.1496	57.557	24.3907	101.135
ENSG00000120519	SLC10A7	23.1952	-0.473271	0.3391	-1.39567	0.162815	0.983723	30.2682	24.9825	24.6703	27.5842	18.8999	23.4927	23.2292	12.4346
ENSG00000119915	ELOVL3	0.956098	2.46173	1.76384	1.39567	0.162815	0.983723	0	0	0	0.951178	4.36151	1.17463	1.16146	0
ENSG00000228857	AC104653.1	8.93336	0.768965	0.551009	1.39556	0.162848	0.983723	3.18613	9.99302	3.52433	8.56061	13.0845	9.39707	16.2604	7.46077
ENSG00000177822	AC098864.1	6.41859	-0.90341	0.647366	-1.39552	0.16286	0.983723	7.96532	7.49476	12.9225	4.75589	2.90767	3.5239	9.29168	2.48692
ENSG00000267023	LRRC37A16P	17.4202	0.51165	0.366646	1.39549	0.162868	0.983723	9.55838	17.4878	14.0973	15.2189	18.8999	21.1434	19.7448	23.2113
ENSG00000169738	DCXR	224.326	0.422319	0.302655	1.39538	0.1629	0.983723	148.155	192.366	230.256	194.992	226.072	165.623	421.61	215.533
ENSG00000180626	ZNF594	17.6462	-0.819606	0.587384	-1.39535	0.16291	0.983723	19.1168	20.6106	17.6216	32.3401	10.1769	29.3658	1.16146	10.7767
ENSG00000167792	NDUFV1	631.481	0.293534	0.210379	1.39526	0.162936	0.983723	567.131	603.329	548.62	549.781	668.765	547.379	961.689	605.151
ENSG00000250365	AL139353.2	2.11024	-2.03955	1.46199	-1.39506	0.162999	0.983723	0	4.37195	9.39821	0	1.45384	0	0	1.65795
ENSG00000152078	TMEM56	3.29616	-1.28579	0.921681	-1.39504	0.163003	0.983723	4.77919	1.87369	9.39821	2.85354	1.45384	3.5239	0	2.48692
ENSG00000134330	IAH1	145.466	0.294399	0.211039	1.395	0.163017	0.983723	125.852	136.779	129.225	129.36	151.926	152.702	210.224	127.662
ENSG00000104824	HNRNPL	61.4618	-0.363289	0.260448	-1.39486	0.163058	0.983723	60.5364	61.8318	86.9334	67.5337	54.5189	68.1287	38.3282	53.8834
ENSG00000117410	ATP6V0B	1310.74	0.413538	0.296476	1.39485	0.163062	0.983723	968.583	1239.13	1198.27	1089.1	1251.75	1092.41	2565.67	1080.98
ENSG00000164091	WDR82	188.221	-0.423343	0.303561	-1.39459	0.16314	0.983723	175.237	215.474	230.256	241.599	181.003	213.783	74.3334	174.085
ENSG00000162729	IGSF8	195.077	-0.344096	0.246823	-1.3941	0.163287	0.983723	170.458	206.106	245.528	251.111	187.545	186.767	109.177	203.928
ENSG00000136273	HUS1	139.72	0.359858	0.25817	1.39388	0.163353	0.983723	92.3977	112.421	139.798	143.628	154.107	130.384	220.677	124.346
ENSG00000131652	THOC6	59.7702	0.354108	0.254049	1.39386	0.16336	0.983723	43.0127	58.0844	54.0397	53.266	58.1535	54.0331	87.1095	70.4628
ENSG00000075213	SEMA3A	199.262	-0.316513	0.227089	-1.39378	0.163384	0.983723	246.925	227.966	212.634	197.845	182.456	203.212	114.985	208.073
ENSG00000261118	AC092123.1	0.927004	2.27249	1.63069	1.39357	0.163447	0.983723	0	0	1.17478	0	0.726918	3.5239	1.16146	0.828975
ENSG00000123178	SPRYD7	189.117	0.406588	0.291767	1.39354	0.163458	0.983723	144.969	152.394	144.497	207.357	175.914	178.544	348.438	160.821
ENSG00000042088	TDP1	56.5753	-0.353394	0.253598	-1.39352	0.163462	0.983723	58.9434	52.4634	75.1857	67.5337	55.2458	50.5092	54.5886	38.1328
ENSG00000182768	NGRN	107.44	0.354871	0.254667	1.39347	0.163479	0.983723	92.3977	113.671	96.3316	74.1919	128.665	83.399	155.636	115.227
ENSG00000173040	EVC2	34.791	-0.468062	0.33593	-1.39333	0.163519	0.983723	33.4543	49.3405	34.0685	43.7542	29.8036	43.4614	16.2604	28.1851
ENSG00000143614	GATAD2B	17.327	-0.751393	0.539543	-1.39265	0.163726	0.983723	25.489	9.36846	24.6703	27.5842	7.26918	24.6673	4.64584	14.9215
ENSG00000022277	RTF2	390.184	0.341105	0.244933	1.39265	0.163726	0.983723	286.751	406.591	310.141	370.96	388.901	368.835	635.319	353.972
ENSG00000163703	CRELD1	263.997	0.301983	0.216854	1.39257	0.163751	0.983723	186.388	266.689	281.946	209.259	288.587	231.403	354.245	293.457
ENSG00000005238	FAM214B	300.246	-0.334842	0.240454	-1.39254	0.163759	0.983723	356.846	297.292	366.53	320.547	282.044	319.5	159.12	300.089
ENSG00000157800	SLC37A3	339.764	-0.253407	0.182065	-1.39185	0.163967	0.983723	387.114	336.015	363.006	393.788	334.382	335.945	234.615	333.248
ENSG00000158315	RHBDL2	11.6401	0.789579	0.567293	1.39184	0.163972	0.983723	6.37225	9.99302	8.22343	8.56061	5.81535	21.1434	25.5521	7.46077
ENSG00000117614	SYF2	152.958	0.500481	0.359599	1.39178	0.16399	0.983723	124.259	128.036	118.652	135.067	153.38	108.066	342.631	113.57
ENSG00000100413	POLR3H	284.339	0.273475	0.19654	1.39145	0.16409	0.983723	215.064	315.405	254.926	241.599	322.752	280.737	368.183	276.049
ENSG00000172007	RAB33B	47.0143	-0.419251	0.301376	-1.39112	0.164188	0.983723	55.7572	54.9616	62.2631	41.8519	36.3459	61.0809	29.0365	34.8169
ENSG00000182004	SNRPE	240.1	0.378938	0.272398	1.39112	0.164189	0.983723	170.458	239.832	206.761	215.918	228.252	202.037	426.256	231.284
ENSG00000120727	PAIP2	205.413	0.389322	0.279932	1.39078	0.164293	0.983723	176.83	179.25	158.595	195.943	210.079	162.099	373.99	186.519
ENSG00000142867	BCL10	167.036	0.420184	0.302167	1.39057	0.164356	0.983723	170.458	133.657	109.254	157.896	169.372	170.322	304.303	121.03
ENSG00000197647	ZNF433	11.8817	0.67496	0.485441	1.39041	0.164406	0.983723	9.55838	9.99302	2.34955	14.2677	13.0845	16.4449	12.7761	16.5795
ENSG00000169241	SLC50A1	304.159	0.445432	0.320365	1.39039	0.164411	0.983723	245.332	287.924	231.431	264.428	314.756	233.752	620.22	235.429
ENSG00000185825	BCAP31	1412.52	0.348598	0.250793	1.38998	0.164534	0.983723	1161.34	1402.15	1271.11	1134.76	1417.49	1155.84	2417	1340.45
ENSG00000111863	ADTRP	26.9215	0.522554	0.376092	1.38943	0.164702	0.983723	15.9306	25.6071	24.6703	20.9259	21.8075	23.4927	52.2657	30.6721
ENSG00000197375	SLC22A5	24.4116	-0.486987	0.350515	-1.38935	0.164727	0.983723	35.0474	29.9791	27.0198	22.8283	23.2614	23.4927	10.4531	23.2113
ENSG00000160360	GPSM1	71.122	-0.474649	0.34165	-1.38928	0.164746	0.983723	62.1295	84.3161	69.3118	115.093	68.3303	69.3034	26.7136	73.7787
ENSG00000130559	CAMSAP1	52.3428	-0.552726	0.397936	-1.38898	0.164838	0.983723	43.0127	55.5862	74.0109	77.0455	47.2497	38.7629	15.099	67.9759
ENSG00000188906	LRRK2	9.62632	0.853749	0.614703	1.38888	0.16487	0.983723	12.7445	4.99651	5.87388	4.75589	13.0845	19.9688	2.32292	13.2636
ENSG00000159884	CCDC107	19.3381	0.698025	0.502597	1.38884	0.164883	0.983723	7.96532	19.986	11.7478	18.0724	20.3537	9.39707	46.4584	20.7244
ENSG00000121753	ADGRB2	27.4611	-0.608572	0.438191	-1.38883	0.164885	0.983723	19.1168	21.2352	37.5928	55.1684	27.6229	21.1434	10.4531	27.3562
ENSG00000105677	TMEM147	621.699	0.42722	0.307639	1.38871	0.164922	0.983723	473.14	608.95	560.368	477.492	639.688	482.774	1228.82	502.359
ENSG00000159199	ATP5MC1	447.277	0.436778	0.314527	1.38868	0.164929	0.983723	329.764	430.324	404.123	354.79	436.878	332.421	903.616	386.302
ENSG00000137714	FDX1	80.3933	0.359041	0.258561	1.38861	0.16495	0.983723	62.1295	69.3266	56.3892	92.2643	80.6879	89.2721	118.469	74.6077
ENSG00000110711	AIP	218.668	0.428998	0.308948	1.38858	0.164961	0.983723	164.086	237.334	165.643	176.919	234.068	155.052	412.318	203.928
ENSG00000164647	STEAP1	185.064	0.55019	0.396316	1.38826	0.165057	0.983723	132.224	178.001	140.973	148.384	172.28	126.86	454.131	127.662
ENSG00000212907	MT-ND4L	867.332	0.371938	0.267919	1.38825	0.165062	0.983723	799.718	758.22	775.352	690.556	768.353	811.672	1585.39	749.393
ENSG00000197568	HHLA3	55.4212	0.547454	0.394442	1.38792	0.165161	0.983723	39.8266	53.7125	61.0883	24.7306	47.9766	48.16	117.307	50.5675
ENSG00000272693	AC073107.1	2.01105	-1.76601	1.27259	-1.38773	0.16522	0.983723	3.18613	6.24564	0	2.85354	1.45384	2.34927	0	0
ENSG00000245552	AP000787.1	1.32534	2.33878	1.68559	1.38751	0.165286	0.983723	0	1.24913	0	0	0.726918	0	6.96876	1.65795
ENSG00000076067	RBMS2	212.603	-0.314138	0.226407	-1.38749	0.165292	0.983723	267.635	186.745	239.654	251.111	218.802	202.037	130.084	204.757
ENSG00000162244	RPL29	745.223	0.434665	0.313335	1.38722	0.165374	0.983723	514.56	738.234	656.7	623.973	713.107	594.364	1504.09	616.757
ENSG00000121316	PLBD1	0.825032	-2.45861	1.77253	-1.38706	0.165422	0.983723	0	3.74738	1.17478	0.951178	0.726918	0	0	0
ENSG00000244038	DDOST	2104.9	0.239231	0.17249	1.38693	0.165463	0.983723	1804.94	2154.12	1918.41	1843.38	2142.95	1978.08	2856.03	2141.24
ENSG00000164898	FMC1	5.16064	1.06823	0.770304	1.38676	0.165514	0.983723	3.18613	1.87369	3.52433	4.75589	4.36151	2.34927	16.2604	4.97385
ENSG00000127951	FGL2	1.58405	1.85893	1.34049	1.38675	0.165517	0.983723	0	1.24913	1.17478	0	0.726918	5.87317	1.16146	2.48692
ENSG00000225511	LINC00475	5.13802	1.06978	0.771463	1.38669	0.165538	0.983723	0	6.8702	2.34955	2.85354	2.90767	7.0478	11.6146	7.46077
ENSG00000267505	AC005180.2	4.37309	-0.978429	0.705602	-1.38666	0.165546	0.983723	4.77919	4.37195	4.6991	9.51178	3.63459	2.34927	2.32292	3.3159
ENSG00000179406	LINC00174	4.44816	-0.977038	0.704614	-1.38663	0.165555	0.983723	6.37225	6.24564	2.34955	8.56061	2.90767	2.34927	3.48438	3.3159
ENSG00000143322	ABL2	93.7794	-0.50044	0.360912	-1.3866	0.165564	0.983723	154.527	57.4599	148.022	81.8014	93.0455	81.0497	46.4584	87.8713
ENSG00000025156	HSF2	65.3354	0.324674	0.234154	1.38658	0.16557	0.983723	58.9434	54.337	62.2631	58.0219	85.7763	57.557	66.2032	79.5816
ENSG00000198168	SVIP	69.0008	0.589191	0.42494	1.38653	0.165586	0.983723	54.1642	66.2038	34.0685	64.6801	49.4304	68.1287	167.25	48.0805
ENSG00000139428	MMAB	191.704	0.377211	0.272056	1.38652	0.165588	0.983723	144.969	190.492	170.342	160.749	236.248	118.638	283.396	228.797
ENSG00000163344	PMVK	222.359	0.365001	0.263321	1.38614	0.165703	0.983723	183.202	208.604	192.663	192.138	246.425	167.973	379.797	208.073
ENSG00000183891	TTC32	12.4448	0.661541	0.477258	1.38613	0.165707	0.983723	11.1514	6.8702	4.6991	16.17	15.2653	10.5717	17.4219	17.4085
ENSG00000250317	SMIM20	118.121	0.435399	0.314124	1.38607	0.165724	0.983723	92.3977	96.1828	96.3316	116.044	119.215	84.5736	229.969	110.254
ENSG00000096092	TMEM14A	226.029	0.490792	0.354097	1.38604	0.165735	0.983723	183.202	189.867	185.615	192.138	194.814	199.688	508.72	154.189
ENSG00000162458	FBLIM1	553.643	-0.454632	0.328048	-1.38587	0.165786	0.983723	705.727	578.971	614.408	662.971	519.747	492.171	186.995	668.154
ENSG00000186350	RXRA	18.439	-0.59184	0.427126	-1.38563	0.165859	0.983723	31.8613	16.2387	10.573	30.4377	13.0845	17.6195	12.7761	14.9215
ENSG00000182141	ZNF708	12.25	-0.656861	0.474067	-1.38559	0.165873	0.983723	14.3376	9.99302	17.6216	18.0724	11.6307	11.7463	10.4531	4.14487
ENSG00000148303	RPL7A	588.911	0.40605	0.293069	1.38551	0.165896	0.983723	406.231	568.978	541.572	507.929	592.438	439.313	1106.87	547.952
ENSG00000110717	NDUFS8	589.696	0.446313	0.322169	1.38534	0.165949	0.983723	395.08	617.069	496.93	486.052	623.696	404.074	1170.75	523.912
ENSG00000214160	ALG3	437.294	0.315941	0.228067	1.3853	0.165961	0.983723	336.136	440.317	429.968	350.034	446.328	407.598	681.777	406.198
ENSG00000233325	MIPEPP3	6.00245	0.90133	0.650663	1.38525	0.165976	0.983723	4.77919	1.87369	5.87388	4.75589	9.44994	4.69853	11.6146	4.97385
ENSG00000214300	SPDYE3	15.3895	-0.599956	0.433306	-1.3846	0.166175	0.983723	19.1168	19.3615	17.6216	19.0236	20.3537	9.39707	5.8073	12.4346
ENSG00000175854	SWI5	222.883	0.506941	0.366163	1.38447	0.166215	0.983723	164.086	198.611	169.168	203.552	201.356	139.781	507.558	198.954
ENSG00000166136	NDUFB8	50.0401	0.516912	0.373399	1.38434	0.166253	0.983723	46.1988	49.9651	29.3694	38.0471	37.0728	52.8585	104.531	42.2777
ENSG00000224877	NDUFAF8	213.987	0.521503	0.376784	1.38409	0.166331	0.983723	162.492	226.092	160.944	152.189	206.445	131.559	488.975	183.203
ENSG00000249915	PDCD6	612.786	0.391839	0.283231	1.38346	0.166523	0.983723	505.001	555.862	553.319	505.076	578.627	492.171	1162.62	549.61
ENSG00000181458	TMEM45A	374.839	0.353519	0.255557	1.38333	0.166564	0.983723	309.054	351.005	338.335	316.742	355.463	339.469	656.225	332.419
ENSG00000238278	ALG1L6P	3.40455	-1.08956	0.78784	-1.38298	0.166672	0.983723	6.37225	3.74738	4.6991	3.80471	1.45384	2.34927	2.32292	2.48692
ENSG00000139197	PEX5	81.9578	-0.447608	0.323674	-1.3829	0.166695	0.983723	101.956	81.8178	102.205	93.2155	78.5072	95.1453	29.0365	73.7787
ENSG00000198171	DDRGK1	245.949	0.366344	0.265111	1.38185	0.167018	0.983723	205.505	246.078	202.061	204.503	256.602	206.735	429.74	216.362
ENSG00000235001	EIF4A1P2	0.903235	-2.39438	1.73284	-1.38177	0.167044	0.983723	0	0.624564	3.52433	1.90236	0	1.17463	0	0
ENSG00000150316	CWC15	221.778	0.394379	0.285435	1.38168	0.167071	0.983723	178.423	183.622	206.761	196.894	212.26	190.291	416.964	189.006
ENSG00000185278	ZBTB37	4.6596	-0.982785	0.711353	-1.38157	0.167103	0.983723	7.96532	6.24564	4.6991	5.70707	3.63459	5.87317	2.32292	0.828975
ENSG00000239665	AL157392.3	4.58505	-1.08449	0.785025	-1.38147	0.167135	0.983723	11.1514	6.8702	3.52433	3.80471	5.81535	3.5239	1.16146	0.828975
ENSG00000063177	RPL18	635.519	0.459226	0.33246	1.3813	0.167187	0.983723	434.906	614.571	513.377	576.414	604.796	458.107	1341.49	540.491
ENSG00000138074	SLC5A6	130.734	-0.368401	0.266786	-1.38089	0.167314	0.983723	162.492	131.783	164.469	132.214	126.484	133.908	62.7188	131.807
ENSG00000133997	MED6	75.0244	0.427258	0.30946	1.38066	0.167385	0.983723	81.2462	68.0774	51.6901	55.1684	85.0494	59.9063	133.568	65.489
ENSG00000175352	NRIP3	104.875	0.302704	0.219262	1.38056	0.167415	0.983723	82.8393	82.4424	95.1568	115.093	133.753	112.765	120.792	96.1611
ENSG00000102575	ACP5	0.883796	2.21627	1.60535	1.38055	0.167417	0.983723	0	0	1.17478	0	0.726918	2.34927	1.16146	1.65795
ENSG00000196793	ZNF239	24.9829	-0.465775	0.337437	-1.38033	0.167484	0.983723	19.1168	29.3545	39.9424	26.633	18.173	25.8419	20.9063	19.8954
ENSG00000156103	MMP16	59.6059	-0.411406	0.298225	-1.37952	0.167736	0.983723	76.4671	59.3336	71.6613	66.5825	59.6073	49.3346	26.7136	67.1469
ENSG00000160124	CCDC58	3.67406	1.13285	0.821255	1.37942	0.167766	0.983723	4.77919	2.49825	2.34955	0	5.08843	7.0478	3.48438	4.14487
ENSG00000216740	ANXA2P3	1.20902	1.97432	1.43133	1.37937	0.167782	0.983723	0	0.624564	1.17478	0	0.726918	1.17463	3.48438	2.48692
ENSG00000168303	MPLKIP	159.726	0.401265	0.290911	1.37934	0.167789	0.983723	117.887	143.025	135.099	153.14	151.199	132.734	299.657	145.071
ENSG00000131386	GALNT15	13.4711	-0.70399	0.510482	-1.37907	0.167873	0.983723	15.9306	20.6106	15.2721	15.2189	10.9038	12.921	1.16146	15.7505
ENSG00000144724	PTPRG	171.691	-0.624575	0.453299	-1.37784	0.168251	0.983723	205.505	137.404	253.752	236.843	124.303	225.53	30.198	159.992
ENSG00000109854	HTATIP2	358.01	0.385189	0.279564	1.37782	0.168258	0.983723	299.496	346.633	314.84	279.646	343.832	333.596	660.871	285.167
ENSG00000183741	CBX6	69.0335	-0.377893	0.274277	-1.37778	0.168272	0.983723	84.4324	78.0705	79.8848	71.3384	79.961	59.9063	34.8438	63.831
ENSG00000067113	PLPP1	207.651	0.312187	0.226646	1.37742	0.168383	0.983723	152.934	223.594	171.517	190.236	191.179	196.164	304.303	231.284
ENSG00000240342	RPS2P5	151.998	0.410102	0.297765	1.37727	0.16843	0.983723	111.514	139.278	124.526	145.53	166.464	116.289	282.235	130.149
ENSG00000090273	NUDC	604.265	0.398419	0.289327	1.37705	0.168496	0.983723	409.417	607.7	560.368	506.027	614.973	498.045	1121.97	515.622
ENSG00000231728	AC234782.2	1.27438	2.09921	1.52465	1.37685	0.168559	0.983723	0	0.624564	1.17478	0	0.726918	3.5239	0	4.14487
ENSG00000179833	SERTAD2	65.0942	-0.516666	0.375293	-1.3767	0.168604	0.983723	117.887	38.0984	64.6127	87.5084	50.1574	68.1287	31.3594	63.0021
ENSG00000125779	PANK2	142.81	0.333601	0.242328	1.37665	0.168619	0.983723	97.1769	159.264	128.051	117.946	138.841	152.702	212.547	135.952
ENSG00000114316	USP4	269.836	-0.269593	0.195848	-1.37654	0.168655	0.983723	296.31	267.938	300.743	316.742	269.687	250.197	177.703	279.364
ENSG00000196756	SNHG17	109.576	0.436086	0.316799	1.37654	0.168656	0.983723	66.9087	88.0635	96.3316	119.848	108.311	89.2721	206.74	101.135
ENSG00000134146	DPH6	42.2823	0.626304	0.454993	1.37651	0.168663	0.983723	33.4543	35.6001	16.4469	46.6077	42.1613	36.4136	101.047	26.5272
ENSG00000149016	TUT1	28.7035	-0.456924	0.331947	-1.3765	0.168668	0.983723	35.0474	43.0949	22.3207	32.3401	26.896	23.4927	17.4219	29.0141
ENSG00000131174	COX7B	596.447	0.408443	0.296813	1.37609	0.168793	0.983723	503.408	535.251	496.93	513.636	544.462	492.171	1180.04	505.675
ENSG00000169583	CLIC3	72.0552	0.40586	0.294973	1.37592	0.168846	0.983723	47.7919	84.9407	49.3406	63.729	74.8726	57.557	110.339	87.8713
ENSG00000148600	CDHR1	4.50343	-1.12977	0.82116	-1.37582	0.168877	0.983723	3.18613	10.6176	4.6991	5.70707	1.45384	7.0478	0	3.3159
ENSG00000241015	TPM3P9	21.3953	0.574483	0.41756	1.37581	0.168881	0.983723	12.7445	10.6176	15.2721	30.4377	32.7113	18.7941	23.2292	27.3562
ENSG00000173567	ADGRF3	2.51742	1.45835	1.06042	1.37525	0.169053	0.983723	0	1.87369	2.34955	0.951178	3.63459	4.69853	0	6.6318
ENSG00000118985	ELL2	395.342	-0.268757	0.195483	-1.37483	0.169183	0.983723	458.802	366.619	434.667	469.882	398.351	413.471	269.459	351.485
ENSG00000116857	TMEM9	333.109	0.266018	0.193499	1.37478	0.169201	0.983723	281.972	322.275	305.442	298.67	347.467	305.405	476.199	327.445
ENSG00000120738	EGR1	8.61305	0.680013	0.494809	1.37429	0.169351	0.983723	4.77919	6.8702	5.87388	8.56061	10.1769	11.7463	9.29168	11.6056
ENSG00000070367	EXOC5	444.806	-0.384384	0.279754	-1.37401	0.16944	0.983723	634.039	450.935	473.435	458.468	417.978	429.916	202.094	491.582
ENSG00000138744	NAAA	172.052	0.300805	0.218929	1.37398	0.169447	0.983723	132.224	169.257	178.566	135.067	173.733	163.274	248.552	175.743
ENSG00000178307	TMEM11	257.953	0.394308	0.286987	1.37396	0.169455	0.983723	181.609	241.706	219.683	247.306	260.964	177.37	456.454	278.535
ENSG00000075303	SLC25A40	31.3205	0.4553	0.331404	1.37385	0.169488	0.983723	41.4197	24.9825	22.3207	18.0724	28.3498	41.1122	39.4896	34.8169
ENSG00000136960	ENPP2	14.0443	-0.704484	0.512826	-1.37373	0.169526	0.983723	6.37225	17.4878	34.0685	11.4141	10.9038	8.22243	13.9375	9.9477
ENSG00000080608	PUM3	233.509	0.256494	0.186743	1.37351	0.169593	0.983723	172.051	248.576	203.236	224.478	260.964	224.355	285.719	248.692
ENSG00000106483	SFRP4	268.888	0.217618	0.158485	1.37311	0.169718	0.983723	253.297	271.685	237.305	231.136	280.59	272.515	325.209	279.364
ENSG00000011105	TSPAN9	58.691	0.335368	0.244249	1.37306	0.169735	0.983723	35.0474	61.2072	54.0397	55.1684	63.9688	63.4302	66.2032	70.4628
ENSG00000255910	AC024901.1	4.41981	-1.00271	0.731056	-1.37158	0.170193	0.983723	7.96532	5.62107	4.6991	5.70707	2.90767	0	3.48438	4.97385
ENSG00000204311	PJVK	3.78273	1.21638	0.886875	1.37153	0.170209	0.983723	1.59306	3.74738	3.52433	0	7.26918	2.34927	9.29168	2.48692
ENSG00000176597	B3GNT5	40.0686	-0.398014	0.290213	-1.37146	0.170233	0.983723	36.6405	34.9756	59.9136	51.3636	35.619	31.7151	31.3594	38.9618
ENSG00000198538	ZNF28	91.5427	-0.425798	0.310484	-1.3714	0.17025	0.983723	108.328	89.3126	136.274	87.5084	82.1418	78.7004	40.6511	109.425
ENSG00000145741	BTF3	849.708	0.451893	0.329555	1.37122	0.170306	0.983723	629.26	766.964	734.235	739.066	774.168	662.493	1820.01	671.469
ENSG00000100138	SNU13	720.087	0.392141	0.286001	1.37112	0.170337	0.983723	579.875	667.034	623.806	619.217	681.122	610.809	1378.65	600.178
ENSG00000197724	PHF2	6.55825	-0.899639	0.656179	-1.37103	0.170367	0.983723	15.9306	6.8702	3.52433	8.56061	5.08843	4.69853	1.16146	6.6318
ENSG00000136169	SETDB2	35.8064	-0.56709	0.413645	-1.37096	0.170388	0.983723	39.8266	41.2212	24.6703	65.6313	26.896	27.0166	13.9375	47.2516
ENSG00000169180	XPO6	239.159	-0.475708	0.347031	-1.37079	0.170439	0.983723	275.6	214.85	312.49	311.035	236.975	253.721	73.172	235.429
ENSG00000106692	FKTN	133.49	-0.449949	0.32834	-1.37037	0.17057	0.983723	180.016	121.165	130.4	185.48	105.403	171.496	54.5886	119.372
ENSG00000198455	ZXDB	39.0504	-0.484611	0.353708	-1.37009	0.17066	0.983723	62.1295	39.3475	44.6415	37.096	24.7152	42.2868	17.4219	44.7646
ENSG00000153930	ANKFN1	6.96874	1.10317	0.805292	1.36989	0.17072	0.983723	0	11.8667	3.52433	0.951178	5.08843	12.921	13.9375	7.46077
ENSG00000184445	KNTC1	9.36491	-0.869395	0.634783	-1.36959	0.170814	0.983723	14.3376	11.8667	5.87388	16.17	9.44994	11.7463	4.64584	0.828975
ENSG00000275611	AL159153.1	0.882946	-2.3823	1.73956	-1.36948	0.170848	0.983723	3.18613	1.87369	1.17478	0	0	0	0	0.828975
ENSG00000185658	BRWD1	107.149	-0.300574	0.219482	-1.36947	0.170851	0.983723	121.073	111.797	109.254	132.214	105.403	98.6692	68.5261	110.254
ENSG00000105325	FZR1	71.6486	-0.473507	0.345786	-1.36936	0.170885	0.983723	82.8393	74.9476	83.4091	93.2155	74.8726	62.2556	22.0677	79.5816
ENSG00000185798	WDR53	36.4727	0.532206	0.388887	1.36853	0.171145	0.983723	28.6751	36.8493	31.7189	20.9259	28.3498	38.7629	76.6564	29.8431
ENSG00000197785	ATAD3A	125.947	-0.323096	0.236095	-1.3685	0.171156	0.983723	159.306	127.411	143.323	132.214	133.026	115.114	72.0105	125.175
ENSG00000278311	GGNBP2	328.325	0.286229	0.209176	1.36837	0.171197	0.983723	277.193	304.787	303.092	296.768	317.663	315.976	499.428	311.694
ENSG00000103254	FAM173A	89.7228	0.516696	0.377713	1.36796	0.171324	0.983723	63.7225	98.6811	65.7874	65.6313	96.6801	70.478	196.287	60.5151
ENSG00000198918	RPL39	94.2663	0.469373	0.343183	1.36771	0.171404	0.983723	71.6879	93.06	70.4866	79.899	101.042	62.2556	192.802	82.8975
ENSG00000177302	TOP3A	66.8306	-0.401899	0.293867	-1.36762	0.171431	0.983723	66.9087	86.8144	66.9622	82.7525	50.1574	81.0497	33.6823	66.318
ENSG00000238280	AL133417.1	0.869393	2.19553	1.60547	1.36753	0.171458	0.983723	0	0	1.17478	0	1.45384	1.17463	2.32292	0.828975
ENSG00000269313	MAGIX	7.05751	0.811471	0.593481	1.36731	0.171528	0.983723	4.77919	4.99651	4.6991	5.70707	7.9961	7.0478	16.2604	4.97385
ENSG00000118508	RAB32	1059.33	0.384401	0.281182	1.36709	0.171597	0.983723	904.86	1009.92	851.712	908.375	1024.95	882.15	1996.55	896.122
ENSG00000176040	TMPRSS7	1.79085	-1.70454	1.24698	-1.36693	0.171646	0.983723	3.18613	1.24913	1.17478	5.70707	2.18075	0	0	0.828975
ENSG00000142731	PLK4	4.02978	1.14345	0.83656	1.36684	0.171674	0.983723	4.77919	0.624564	2.34955	2.85354	5.08843	10.5717	3.48438	2.48692
ENSG00000070770	CSNK2A2	81.12	-0.44359	0.324625	-1.36647	0.171792	0.983723	130.631	61.2072	99.8559	83.7037	61.788	98.6692	41.8126	71.2918
ENSG00000105696	TMEM59L	17.9429	0.545926	0.39957	1.36629	0.171849	0.983723	11.1514	18.7369	14.0973	13.3165	18.8999	14.0956	32.5209	20.7244
ENSG00000109794	FAM149A	18.6495	-0.557323	0.407968	-1.36609	0.17191	0.983723	35.0474	19.986	23.4955	11.4141	13.8114	14.0956	13.9375	17.4085
ENSG00000175764	TTLL11	15.021	0.552877	0.404807	1.36578	0.172008	0.983723	7.96532	14.9895	16.4469	8.56061	17.446	16.4449	20.9063	17.4085
ENSG00000163558	PRKCI	236.852	-0.300423	0.219992	-1.36561	0.172062	0.983723	258.076	208.604	304.267	276.793	226.798	214.958	153.313	252.008
ENSG00000242221	PSG2	2.01416	1.79896	1.31741	1.36552	0.172088	0.983723	1.59306	1.87369	0	0	1.45384	7.0478	0	4.14487
ENSG00000254615	AC027031.2	23.4356	0.592956	0.434303	1.3653	0.172158	0.983723	23.896	19.3615	15.2721	16.17	22.5345	15.2702	53.4272	21.5533
ENSG00000105185	PDCD5	382.697	0.43175	0.316316	1.36493	0.172274	0.983723	277.193	365.994	327.762	331.01	368.548	286.611	777.017	327.445
[truncated: 13,861 more rows]
