# Supplementary material for: Elevated apolipoprotein C3 heightens atherosclerosis risk by mediating arterial accumulation of free cholesterol and local inflammation in diabetes
Source: Research Square preprint supplement (doi:10.21203/rs.3.rs-6979508/v1), 2025-07-16
Supplement: Supplementary file 5 [file c907745d53c5b445a8bd0264.xlsx]

## Sheet: Read me
All data included in the graphs
Blue italicized values are statistical outliers based on ROUT at Q=0.1%
The human datasets can be accessed by reasonable request to the MESA Publication and Presentations Committee (https://www.mesa-nhlbi.org).
For scRNA-seq data (Figures 3 and Extended Data Figure 9), see individual spreadsheets (Supplemental Excel 1-4)

## Sheet: Figure 1a
Sudan IV staining (mm2)
Week 6	ND	D
	4531	2008
	6436	2054
	0	0
	1146	6348
	0	12474
	3067	2504
	2782	2556
	26020*	0
	306	193
	650	28028*
n	9	9
Week 9	ND	D
	60648	182353
	25836	89591.5
	41793.3	2207600.35*
	1574.73	140613
	111470	64784.3
	1041.51	161546
	89747	81758.6
	1861783.47*	113431
	81831.5	93673.5
	110848	497842.054*
	57835.1
	21278.1
	10113.1
n	12	8
Week 12	ND	D																														982000	762000	476000	188000		453000	514000		770000		111000	268000	367000
	342000	368000
	31000	1001000
	0	111000
	102000	356000
	43000	982000
	138000	762000
	128000	476000
	96000	188000
	0	453000
	140000	514000
	29000	770000
	0	111000
	123000	268000
	18000	367000
	0
	40000
	24000
	0
	0
	108000
	76000
	18000
	275000
	0
n	24	14
Two-way ANOVA	Ordinary
Alpha	0.05
Source of Variation	P value
Interaction	1.1e-06
Duration	2.06e-09
Diabetes	1.57e-05

## Sheet: Figure 1b
Sudan IV staining (mm2)
Week 2	ND	D
	5939.25	0
	3451.45	3874.28
	7453.56	0
	3736.61	0
	14956.3	9715.2
		11386.8
		66413.412*
		36078
n	5	7
Week 6	ND	D
	5300.09	105805
	22645.9	58989.3
	12606.2	34111.4
	3264.62	55803.4
	5172.26	146416
	26923.3	62617.8
	41505.9	8761.38
	36451.7	22577
n	8	8
Week 9	ND	D
	17192	67905.8
	28681	121675
	20311	83247
	123762.428*	48465.7
	535597*	241533
	23367	39095.3
	23066	75415
	11274.6	334774
	34480.1	361314
	130067*	264222
	144773*	551444
	14868	19440.1
	18579	23366.8
	4927	79008.3
	15707	248999
n	11	15
Two-way ANOVA	Ordinary
Alpha	0.05
Source of Variation	P value
Interaction	0.0324
Duration	0.0152
Diabetes	0.0122

## Sheet: Figure 1c
Plasma APOC3 (mg/mL)
	ND cASO	ND ANGPTL3 ASO	ND APOC3 ASO	D cASO	D ANGPTL3 ASO	D APOC3 ASO
	789.041	272.26	115.718	1841.1	2091.78	268.151
	986.301	504.452	106.731	1323.29	1520.03	476.712
	927.74	447.945	174.965	1178.42	1230.82	206.507
	2182.36	593.322	170.638	1455.82	1478.42	507.534
	2209.65	448.897	128.699	1799.49	1226.71	49.3151
	776.75	846.98	95.7474	4338.87	1567.29	31.3356
	2438.65	1230.09	379.332	4531.92	2090.49	1271.69
	1719.7	1079.97	181.954	3124.64	2559.14	655.927
	1632.16	582.035		4540.9	3454.16	805.707
	1507.01	744.464		4761.82	1654.13	423.933
	1848.18	995.43		2710.58	2642.02	1132.56
		598.012		2257.58	1106.27	804.376
				4210.05	3030.45	341.055
				4272.63	2267.23	541.095
n	11	12	8	14	14	14
Two-way ANOVA
Bonferroni's multiple comparisons test	Adjusted P Value
ND
APOC3 ASO vs. cASO	0.000578
ANGPLT3 ASO vs. cASO	0.0252
ANGPLT3 ASO vs. APOC3 ASO	0.389
D
APOC3 ASO vs. cASO	3.08e-12
ANGPLT3 ASO vs. cASO	0.00165
ANGPLT3 ASO vs. APOC3 ASO	7.96e-06
cASO
D vs. ND	6.83e-06
APOC3 ASO
D vs. ND	0.274
ANGPLT3 ASO
D vs. ND	4.05e-05

## Sheet: Figure 1d
Blood glucose (mg/dL)
Week 0	ND cASO	ND ANGPTL3 ASO	ND APOC3 ASO	D cASO	D ANGPTL3 ASO	D APOC3 ASO
	162	172	127	559	440	558
	180	138	111	568	521	542
	172	187	123	487	413	508
	149	162	122	601	243	460
	106	119	114	554	429	601
	116	134	115	494	473	389
	105	122	136	419	480	421
	155	104	128	381	500	448
	116	134	130	540	500	418
	145	114	138	500	527	516
	114	140	107	485	570	464
	130	117	123	445	451	472
	124	159	116	441	384	301
	134	165	139	544	301	448
	104	125	168	483	545	601
	131	121	134	584	526	477
	115	136	147	601	601	455
	115		124	496	588	529
	128			504	113	448
	117			568	488	433
	139			476	551	457
	143			511	601	489
	175			601		491
	132			586		580
	172			531		486
	163			308		563
	136			474		555
	131			551		580
	118			447		554
	125			459		147
				467		399
				600		513
				533		556
						584
n	30	17	18	33	22	34
Week 4	203	180	107	601	601	577
	205	187	103	601	601	601
	181	208	107	601	571	601
	184	213	167	601	601	601
	159	159	101	601	601	523
	175	190	126	601	483	601
	187	166	109	601	601	579
	223	87	124	601	601	601
	142	199	135	131*	601	601
	131	92	132	601	601	601
	111	98	93	570	267*	601
	122	105	132	601	601	585
	131	189	98	509	569	601
	111	160	185	125*	562	356*
	121	236	174	399*	601	483
	96	182	150	329*	326*	601
	119	201	229	173*	562	601
	108		204	231*	162*	533
	125			601	601	550
	119			601	601	601
	192			601	520	579
	186			499		601
	265			601		408*
	195			573		587
	232			601		583
	194			601		402*
	220			590		511
	159			499		531
	177			471		601
				601		601
				601		448*
				563
				601
				601
n	29	17	18	28	18	27
Week 8	174	157	169	600	247	107
	190	96	127	426	337	516
	161	111	145	423	100	325
	161	173	163	601	443	169
	199	226	131	601	536	414
	171	202	140	449	437	601
	185	186	162	601	601	601
	245	141	177	601	601	483
	269	178	171	560	433	601
	194	127	127	601	601	520
	164	193	103	601	601	601
	193	158	128	601	601	601
	170	171	141	601	499	601
	168	176	168	601	601	569
	121	202	104	398	503	601
	145	202	327*	225	206	555
	127	236	234	297	547	601
	155		223	344	161	468
	97			582	374	570
	140			431	601	555
	112			435	530	313
	180			522		601
	201			502		113
	177			516		601
	162			583		451
	159			572		102
	154			601		588
	156			546		461
	127			187		409
	170			517		341
				601		421
n	30	17	17	31	21	31
Week 12	209	203	104	509	541	601
	156	142	126	554	302	601
	176	147	129	601	601	601
	118	161	129	421	563	341*
	108	154	108	601	601	601
	153	141	149	548	601	584
	124	154	153	594	335	455*
	120	114	135	548	601	448*
	124	129	114	594	495	601
	171	176	132	601	254	601
	148	202	124	601	601	601
	124	165	133	601	601	601
	157	168	121	601	578	601
	123		179	601	199	601
	148		185	135*	505	601
	101		165	452	600	553
	118		172	601		575
	129			553		584
	145			601		601
	190			601		601
	201			601		601
	176			451		601
	200			601		584
	276			601		553
	175			477		601
	181			601		570
	217			601		601
	153			600		600
	192			426		540
				577		369*
				513
n	0	16	17	30	16	26
Two-way ANOVA
Bonferroni's multiple comparisons test	Adjusted P Value
ND cASO vs. ND APOC3	>9.99e-001
ND cASO vs. ND ANGPTL3	>9.99e-001
ND cASO vs. D cASO	6.41e-158
ND cASO vs. D APOC3	4.2e-151
ND cASO vs. D ANGPTL3	1.2e-118
ND APOC3 vs. ND ANGPTL3	>9.99e-001
ND APOC3 vs. D cASO	7.41e-140
ND APOC3 vs. D APOC3	3.23e-134
ND APOC3 vs. D ANGPTL3	2.1e-108
ND ANGPTL3 vs. D cASO	1.75e-126
ND ANGPTL3 vs. D APOC3	4.63e-121
ND ANGPTL3 vs. D ANGPTL3	5.48e-97
D cASO vs. D APOC3	>9.99e-001
D cASO vs. D ANGPTL3	0.00762
D APOC3 vs. D ANGPTL3	0.138

## Sheet: Figure 1e
Plasma triglycerides (mg/dL)
Week 0	ND cASO	ND ANGPTL3 ASO	ND APOC3 ASO	D cASO	D ANGPTL3 ASO	D APOC3 ASO
	77.9856	70.7914	218.294	341.295	190.935	386.619
	74.3885	93.8129	169.881	183.022	126.906	113.237
	68.6331	85.8993	242.103	155.683	120.432	180.863
	65.7554	107.482	130.992	306.043	108.201	126.187
	78.7591	199.197	691.309524*	376.547	97.4101	222.59
	104.307	175.109	223.849	333.381	343.453	234.82
	83.8686	106.496	150.04	152.482	295.252	172.19
	103.577	78.7591	154.802	104.307	213.796	102.847
	109.416	89.708	113.532	202.117	172.92	203.577
	147.659	154.802	140.516	188.978	184.599	366.35
	92.8968	154.802	85.754	234.234	206.496	193.358
	96.8651	186.548	138.135	223.285	128.394	183.139
	134.96	89.9254	188.929	184.599	146.071	119.635
	98.4524	108.582	111.567	219.881	119.087	259.781
	69.881		76.4925	334.167	361.151	524.643
	109.563			331.786	215.299	350.833
	150.04			531.786	421.269	140.516
	135.754			342.103		215.119
	168.294			311.944		245.278
	156.389			655.595		172.262
	168.294			394.484		284.167
	95.8955			134.701		183.373
	89.1791			245.149		218.294
	86.9403			207.836		160.821
	113.806			130.97		467.537
	108.582			122.761		226.493
	83.209			183.955		216.791
				320.522		226.493
						245.149
n	27	14	14	28	17	29
Week 4	37.8014	39.9291	63.4426	266.17	74.6809	88.156
	131.418	49.1489	55.2459	185.319	165.461	140.638
	156.95	62.6241	86.3934	396.667	105.887	117.943
	133.546	45.6028	68.3607	91.7021	126.454	42.0567
	310.455	213.485	120	321.489	27.1631	117.943
	265	186.97	93.7705	198.794	122.199	144.894
	251.364	207.424	84.7541	307.424	169.007	158.182
	263.485	155.152	83.1148	490	218.788	185.455
	223.333	170.303	78.1967	193.030303*	170.303	158.939
	160.164	55.2459	80.6557	418.788	419.545	266.515
	161.803	73.2787	83.9344	557.424	161.97	202.879
	291.311	53.6066	90.4918	606.667	127.879	290.758
	220.82	50.9302	65.082	474.091	147.869	137.727
	238.852	54.031	90.4651	146.23	36.3934	149.848
	169.18	69.5349	49.3798	614.262	79.0164	215.902
	235.574		59.4574	469.18	86.5891	263.443
	87.3643			602.787	42.4031	287.213
	255.581			629.016	209.845	81.4754
	193.566			273.279	46.2791	164.262
				510.984	79.6124	214.262
				262.623		119.18
				649.38		114.262
				832.326		130.775
				347.829		101.318
				307.519		178.837
				467.209		164.884
n	19	15	16	25	20	26
Week 8	132.227	43.1641	58.3	479.883	83.0078	100.195
	176.758	48.6328	67.5	146.289	45.5078	136.914
	104.883	40.0391	85.8	176.758	38.4766	96.2891
	87.6953	38.4766	67.5	140.039	53.3203	109.57
	196.25	26.25	74.2	526.758	49.4141	105.664
	212.5	31.25	80.8	383.008	56.4453	131.445
	146.25	36.25	67.5	833.75	151.25	80
	86.25	68.75	63.3	900	68.75	66.25
	111.25	47.5	69.2	468.75	443.75	116.25
	167.5	78.3	47.5	636.25	81.25	11.25
	176.7	65	74.2	286.25	417.5	53.75
	137.5	66.7	67.5	832.5	288.3	246.25
	172.5		88.3	436.25	58.3	82.5
	218.3			215.8	195.8	201.25
	195.8			491.7		97.5
	209.2			212.5		179.2
	202.5			402.5		70.8
	240			575.8		54.2
	160			901.7		71.7
	195.8			910.8		65.8
	180.8			355		34.2
						42.5
n	21	12	13	21	14	22
Week 12	117.713	40.5426	52.9339	392.907	153.372	120.814
	131.667	39.7674	61.1983	229.341	52.5969	132.442
	8.41085	40.5426	92.6033	250.271	223.915	96.7829
	118.488	76.9767	37.2314	541.744	99.8837	139.419
	141.318	56.0465	58.719	529.341	72.3256	304.535
	183.178	51.281	101.694	645.969	79.3023	196.783
	183.953	54.5868	81.8595	813.411	82.4031	55.2713
	137.442	55.4132	71.1157	670	96.3566	62.2481
	123.488	77.08	76.0744	519.612	56.28	115.736
	168.636	74.1441	79.3802	332.016	116.28	102.558
	154.587	80.4505	57.8926	597.907	66.036	161.473
	217.397	63.3333	62.8512	432.791	120.09	456.046512*
	209.959	39.4186	59.5455	171.942	495.765766*	84.7287
	174.421	11.5116	70.68	469.463	70.4264	116.512
	175.248	54.1473	73.2432	522.355	144.845	201.694
	170.289	45.6202	57.9279	173.595	229.793	156.24
	171.942		44.4144	427.314	73.595	73.595
	145.496			368.636	24.0083	61.1983
	138.058			333.099		62.8512
	251.281			633.08		62.8512
	147.149			640.28		148.802
	82.68			489.88		56.2397
	163.48			660.28		103.48
	116.28			489.88		173.88
	54.68			430.68		145.88
	356.28*			343.514		163.48
	127.297			412.883		452.28*
	99.3694			558.829		268.28
	124.595			521.892		182.252
						93.964
						147.117
n	28	16	17	29	17	29
Two-way ANOVA
Tukey's multiple comparisons test	Adjusted P Value
ND cASO vs. ND APOC3	0.00358
ND cASO vs. ND ANGPTL3	0.000336
ND cASO vs. D cASO	1.09e-11
ND cASO vs. D APOC3	>9.99e-001
ND cASO vs. D ANGPTL3	0.995
ND APOC3 vs. ND ANGPTL3	0.991
ND APOC3 vs. D cASO	1.09e-11
ND APOC3 vs. D APOC3	0.00173
ND APOC3 vs. D ANGPTL3	0.0386
ND ANGPTL3 vs. D cASO	1.09e-11
ND ANGPTL3 vs. D APOC3	0.00014
ND ANGPTL3 vs. D ANGPTL3	0.00619
D cASO vs. D APOC3	1.09e-11
D cASO vs. D ANGPTL3	1.09e-11
D APOC3 vs. D ANGPTL3	0.987

## Sheet: Figure 1f
FPLC - Triglycerides (mg/dL)
			Fraction	ND cASO				ND APOC3				ND ANGPTL3				D cASO				D APOC3				D ANGPTL3
			11	0	0	0	0	0	0	0	0	0	0	0	0	0	0	0	0	0	0	0	0	0	0	0	0
			12	0	0	0	0	0	0	0	0	0	0	0	0	0	0	0	0	0	0	0	0	0	0	0	0
			13	0	0	0	0	0	0	0	0	0	0	0	0	0	0	0	0	0	0	0	0	0	0	0	0
			14	0.167	0	0	0.266	0	0	0	0	0	0	0	0	0.245	0.185	0.178	0	0.364	0.043	0	0	0.253	0	0.182	0
			15	1.678	3.386	3.086	2.205	0	0	0	0	0	0	0	0	3.595	7.166	5.798	1.682	3.116	2.937	2.228	0.452	4.247	0	4.904	1.517
			16	6.334	9.478	5.489	11.375	0.606	0.827	0.614	1.104	1.359	0.262	1.245	0.521	20.898	21.124	20.3	3.841	8.402	6.542	5.102	2.873	15.312	0.958	12.808	4.462
			17	3.092	4.294	1.797	4.537	0.049	0.339	0.548	0.712	0.329	0	0.453	0.123	14.031	9.126	11.662	1.382	3.937	2.378	1.406	1.015	5.836	0.112	4.37	1.659
			18	1.209	1.746	0.865	2.268	0	0.058	0	0.107	0.144	0	0.188	0.333	5.724	3.983	5.081	0.584	1.545	0.971	0.535	0.205	2.365	0	1.926	0.746
			19	0.801	0.938	0.512	1.692	0	0.087	0	0.081	0.071	0	0.566	0	3.202	2.504	2.894	0.565	1.394	0.634	0.231	0.128	1.376	0	1.264	0.443
			20	0.644	0.567	0.318	1.404	0	0.124	0.043	0.15	0.077	0	0.197	0	2.023	1.265	1.766	0.346	0.52	0.286	0.061	0	0.879	0	0.885	0.332
			21	0.692	0.421	0.255	1.506	0.081	0.225	0.144	0.303	0.028	0	0.387	0	1.551	1.429	1.444	0.411	0.45	0.216	0.037	0	0.638	0	0.657	0.304
			22	0.544	0.258	0.13	1.407	0.42	0.319	0.358	0.384	0.04	0	0.488	0	1.243	1.166	1.128	0.514	0.453	0.249	0	0	0.41	0	0.479	0.326
			23	0.475	0.135	0.084	1.15	0.115	0.25	0.17	0.332	0.079	0	0.467	0	0.949	0.92	0.884	0.511	0.436	0.171	0	0	0.306	0	0.404	0.288
			24	0.295	0	0.047	0.859	0.351	0.136	0.092	0.211	0	0	0.366	0.298	0.683	0.74	0.682	0.321	0.439	0.102	0	0	0.146	0	0.307	0.34
			25	0.141	0	0	0.6	0	0	0	0.467	0	0	0.223	0.454	0.437	0.516	0.509	0.257	0.233	0	0	0	0	0	0.157	0
			26	0	0	0	0.341	0	0	0	0	0	0	0	0.25	0.25	0.284	0.338	0.052	0	0	0	0	0	0	0.051	0
			27	0	0	0	0.192	0	0	0	0	0	0	0	1.379	0.194	0.126	0.388	0	0	0	0	0	0	0	0	0
			28	0	0	0	0.055	0	0	0	0	0	0	0	0	0	0	0.17	0	0	0	0	0	0	0	0	0
			29	0	0	0	0	0	0	0	0	0	0	0	0	0	0	0	0	0	0	0	0	0	0	0	0
			30	0	0	0	0	0	0	0	0	0	0	0	0	0	0	0	0	0	0	0	0	0	0	0	0
			31	0	0	0	0	0	0	0	0	0	0	0	0	0	0	0	0	0	0	0	0	0	0	0	0
			32	0	0	0	0	0	0	0	0	0	0	0	0	0	0	0	0	0	0	0	0	0	0	0	0
			33	0	0	0	0	0	0	0	0	0	0	0	0	0	0	0	0	0	0	0	0	0	0	0	0
			34	0	0	0	0	0	0	0	0	0	0	0	0	0	0	0	0	0	0	0	0	0	0	0	0
			35	0	0	0	0	0	0	0	0	0	0	0	0	0	0	0	0	0	0	0	0	0	0	0	0
			36	0	0	0	0	0	0	0	0	0	0	0	0	0	0	0	0	0	0	0	0	0	0	0	0
			37	0	0	0	0	0	0	0	0	0	0	0	0	0	0	0	0	0	0	0	0	0	0	0	0
			38	0	0	0	0	0	0	0	0	0	0	0	0	0	0	0	0	0	0	0	0	0	0	0	0
			39	0	0	0	0	0	0	0	0	0	0	0	0	0	0	0	0	0	0	0	0	0	0	0	0
			40	0	0	0	0	0	0	0	0	0	0	0	0	0	0	0	0	0	0	0	0	0	0	0	0

## Sheet: Figure 1g
Plasma cholesterol (mg/dL)
Week 0	ND cASO	ND ANGPTL3 ASO	ND APOC3 ASO	D cASO	D ANGPTL3 ASO	D APOC3 ASO
	200.719	351.799	192.267	294.245	269.065	254.676
	182.734	186.331	199.72	272.662	222.302	254.676
	197.122	189.928	240.093	240.288	236.691	261.871
	189.928	175.605	199.099	315.827	200.719	204.317
	195.605	169.816	161.211	287.05	215.108	243.885
	176.132	142.447	223.944	323.022	290.647	211.511
	148.763	124.553	228.913	212.447	290.647	202.974
	179.816	161.921	232.019	189.816	210.868	183.5
	147.184	206.553	171.77	244.026	180.868	246.132
	182.329	186.056	219.596	214.553	196.132	254.026
	191.025	266.18	190.404	182.447	204.553	203.5
	146.925	184.61	218.975	233.5	175.079	216.658
	186.056	176.818	190.404	243.5	251.273	225.079
	197.236		195.649	305.311	222.081	237.711
	208.416		178.766	281.087	294.13	381.087
	207.174			276.118	228.766	286.056
	250.031			336.988	277.468	214.627
	240.093			284.814		261.832
	224.565			343.82		286.056
	260.59			240.093		287.298
	197.236			241.957		224.565
	210.584			211.234		286.056
	178.766			263.182		274.255
	162.532			205.39		227.468
	237.208			219.026		361.234
	230.714			230.714		258.636
	212.532			249.545		280.714
				264.481		275.519
						273.571
n	27	13	15	28	17	29
Week 4	268.112	155.524	164.727	430.35	412.867	355.524
	259.021	177.902	153.212	439.441	480	311.469
	324.755	187.692	253.212	522.657	435.944	379.301
	264.615	146.434	192.606	476.503	449.93	340.14
	381.073	288.927	170.788	491.189	363.217	349.231
	350.183	249.136	216.242	448.531	503.077	651.329
	284.215	231.335	208.97	491.021	497.483	330.812
	264.319	110.916	188.364	516.675	651.23	399.921
	202.016	219.817	156.848	387.356	416.675	193.639
	262.909	150.788	250.182	475.838	681.073	442.33
	343.515	153.818	228.364	724.005	637.094	418.77
	381.697	150.182	171.394	678.455	250.183	480.026
	279.273	447.443	128.97	698.874	706.545	247.042
	322.909	176.42	195.17	770.182	383.515	289.974
	225.333	208.239	188.92	715.636	732	526.545
	247.758		100.852	578.667	282.102	572.606
	415.636			901.091	140.625	422.909
	306.545			916.242	364.489	458.061
	301.091			281.697	204.83	555.636
	237.455			733.212	222.443	508.364
	296.848			461.091		569.576
	200.852			514.489		436.848
	315.057			521.307		307.102
	274.716			454.261		265.057
				419.602		276.989
				429.83		317.33
n	24	15	16	26	20	26
Week 8	324.2	210	119.4	588.2	582.486	509.914
	467.629	243	261.4	465.343	463.629	326.486
	417.914	144	171.9	491.057	484.771	556.2
	467.057	131	135.4	607.629	371.629	556.2
	357	162	190.4	594.486	754	181.914
	351	187.9	195.3	797	507	369.914
	314	183.6	174.3	852	744	396
	217	324.9	134.2	533	661	449
	210	190.497	195.3	719	941	235
	210.1	269.497	145.3	759	441.49	375
	260.7	210.378	103.3	924	477.252	404
	295.3	303.656	120	807	297.773	644
	235.4	286.849	202.417	454.6		404
	263.8	190.486	225.71	623.7	433.908	441
	220	208.771	224.664	662.6	391.05	389.1
	236	246.486	170.042	563.2	411.629	410.1
	254.6	264.771	237.269	616.3	373.343	374.9
	307.7			586	479.3	390.4
	187.3			655.8	469.4	418.1
	219.4			506.391	437.9	415.1
	254.6			703.742		420
	408.377			522.285		297.8
	300.43			705.728		316.987
	281.225			715.662		473.278
	399.106			648.113		346.788
	328.907			775.924		349.437
	272.456			954.916		246.126
	499.454			681.807		454.735
	607.017			865		387.689
	373.403					322.983
						475.924
n	30	17	17	29	19	31
Week 12	244.581	217.931	184.804	647.575	587.096	280.509
	372.725	226.897	175.654	441.587	388.293	309.251
	540.988	176.552	245.588	505.06	557.754	343.383
	511.048	129.655	167.157	578.114	464.341	417.635
	338.621	201.379	147.549	702.665	553.103	544.581
	335.172	277.614	202.451	596.552	617.931	530.808
	297.241	329.248	199.183	593.103	517.931	360.69
	253.103	222.059	160.621	608.276	588.966	449.655
	205.517	208.434	141.013	658.621	403.012	351.034
	361.928	213.369	240.359	530.345	453.614	400
	308.987	230.39	183.497	628.966	266.56	398.621
	279.575	290.674	152.124	625.517	377.199	571.034
	486.765	197.874	142.974	749.51	596.348	316.552
	276.307	267.934	220.482	737.092	452.964	445.517
	299.837	244.581	175.071	826.634	495.479	499.837
	304.412	294.88	171.525	722.059	622.059	674.346
	423.366		133.227	806.373	608.333	386.765
	259.314			759.314	585.458	450.163
	267.81			806.373		433.824
	437.745			580.12		342.32
	256.046			530.723		448.856
	269.277			484.337		268.464
	326.506			662.651		286.145
	357.229			708.434		357.831
	209.639			611.446		293.976
	421.084			601.312		356.627
	337.482			580.035		383.735
	287.128			615.496		521.084
	305.567			613.369		474.362
						391.383
						398.475
n	29	16	17	29	18	31
Two-way ANOVA
Tukey's multiple comparisons test	Adjusted P Value
ND APOC3 vs. ND cASO	1.04e-09
ND ANGPTL3 vs. ND cASO	3.64e-05
D cASO vs. ND cASO	2.13e-10
D APOC3 vs. ND cASO	3.39e-09
D ANGPTL3 vs. ND cASO	2.13e-10
ND ANGPTL3 vs. ND APOC3	0.598
D cASO vs. ND APOC3	2.13e-10
D APOC3 vs. ND APOC3	2.13e-10
D ANGPTL3 vs. ND APOC3	2.13e-10
D cASO vs. ND ANGPTL3	2.13e-10
D APOC3 vs. ND ANGPTL3	2.13e-10
D ANGPTL3 vs. ND ANGPTL3	2.13e-10
D APOC3 vs. D cASO	2.13e-10
D ANGPTL3 vs. D cASO	2.15e-10
D ANGPTL3 vs. D APOC3	0.00057

## Sheet: Figure 1h
FPLC - cholesterol (mg/dL)
		Fraction	ND cASO				ND APOC3				ND ANGPTL3				D cASO				D APOC3				D ANGPTL3
		11	0	0	0	0	0	0	0	0	0	0	0	0	0	0	0	0	0	0	0	0	0	0	0	0
		12	0	0	0	0	0	0	0	0	0	0	0	0	0	0	0	0	0	0	0	0	0	0	0	0
		13	0	0	0	0	0	0	0	0	0	0	0	0	0	0	0	0	0	0	0	0	0	0	0	0
		14	0	0	0	0	0	0	0	0	0	0	0	0	0	0	0	0	0	0	0	0	0	0	0	0
		15	0	0	0	0	0	0	0	0	0.505	0	0	0	2.28	3.578	4.081	1.303	1.414	1.463	2.077	0	3.914	1.907	4.409	1.904
		16	5.794	15.979	23.744	5.914	0	0	0	0	4.409	3.298	3.19	0.455	18.803	16.339	21.6	10.872	11.27	12.055	14.075	6.48	24.595	26.867	24.057	16.526
		17	4.528	11.414	12.645	4.052	0	0	0	0	3.019	2.522	0.675	0.421	18.128	11.227	18.144	6.365	8.338	7.632	8.509	4.631	15.317	15.717	14.613	8.852
		18	3.463	7.696	8.097	3.483	0	0	0	0	2.405	1.857	0	0.321	11.805	8.403	12.041	4.65	4.828	5.114	6.047	3.36	8.804	7.718	8.743	5.09
		19	3.66	6.136	5.479	3.899	0.253	0.341	0.235	0.461	2.638	2.08	0	0.657	9.812	8.339	9.78	4.437	3.935	4.52	4.978	2.911	8.322	5.423	7.56	4.533
		20	3.731	4.264	3.346	3.722	0.247	0.85	1.008	1.293	2.76	2.169	0	0.889	8.74	8.019	8.045	4.023	3.213	3.975	4.447	2.718	8.24	3.629	7.38	4.393
		21	3.66	3.345	2.387	4.134	0.924	1.318	1.439	1.515	2.296	2.235	0.309	0.747	9.094	8.673	7.347	4.307	3.114	3.755	4.33	2.541	8.538	2.484	8.078	4.412
		22	3.375	2.344	1.549	3.741	1.248	1.44	1.615	1.84	2.441	2.506	0.377	0.778	9.281	8.252	7.07	4.546	2.848	3.295	4.04	2.368	9.365	2.901	8.139	4.687
		23	2.71	1.632	0.931	2.91	0.702	0.995	1.3	1.465	2.243	2.197	0.222	0.511	8.48	7.141	6.026	4.13	2.448	2.645	3.49	1.698	7.466	1.133	7.851	4.655
		24	1.835	0.899	0.43	1.948	0.092	0.351	0.481	0.799	1.758	1.334	0	0.101	6.88	5.638	4.85	3.829	1.932	1.896	2.567	1.16	5.682	0.559	6.664	4.338
		25	1.079	0.39	0.021	1.277	0	0	0	0.089	1.271	0.903	0	0	5.208	4.036	3.8	2.909	1.456	1.246	1.65	0.525	3.783	0.001	4.981	3.388
		26	0.326	0	0	0.348	0	0	0	0	0.974	0.434	0	0	3.502	2.229	2.434	1.859	0.573	0.452	0.835	0	2.238	0	3.404	2.649
		27	0	0	0	0	0	0	0	0	0.913	0.525	0	0	2.513	1.528	1.742	0.993	0.258	0	0.62	0	1.569	0	2.057	1.68
		28	0.075	0	0	0.028	0	0	0	0	0.989	1.02	0	0	1.518	1.064	1.1	0.502	0.107	0	0.699	0	1.012	0	1.328	1.05
		29	0.953	0.153	0.41	0.682	0	0	0	0	0.898	1.347	0	0	1.388	1.859	1.972	1.012	0.55	0.465	1.508	0.654	1.333	0.73	1.469	0.976
		30	2.378	1.092	1.163	2.181	0	0	0	0	2.002	1.936	0	0.464	2.009	2.463	2.744	1.82	1.351	1.571	2.826	1.919	2.474	2.766	1.869	1.203
		31	2.625	1.072	0.639	2.518	0	0	0	0	2.276	2.722	0	1.054	2.243	2.126	2.521	2.082	1.151	1.249	2.519	2.15	1.658	1.32	1.427	0.87
		32	0.665	0	0	0.715	0	0	0	0	1.441	1.913	0	0.265	1.044	0.457	0.66	0.389	0	0	0.721	0.645	0.172	0	0	0
		33	0	0	0	0	0	0	0	0	0.54	0.845	0	0	0	0	0	0	0	0	0	0	0	0	0	0
		34	0	0	0	0	0	0	0	0	0.548	0	0	0	0	0	0	0	0	0	0	0	0	0	0	0
		35	0	0	0	0	0	0	0	0	0	0	0	0	0	0	0	0	0	0	0	0	0	0	0	0
		36	0	0	0	0	0	0	0	0	0	0	0	0	0	0	0	0	0	0	0	0	0	0	0	0
		37	0	0	0	0	0	0	0	0	0	0	0	0	0	0	0	0	0	0	0	0	0	0	0	0
		38	0	0	0	0	0	0	0	0	0	0	0	0	0	0	0	0	0	0	0	0	0	0	0	0
		39	0	0	0	0	0	0	0	0	0	0	0	0	0	0	0	0	0	0	0	0	0	0	0	0
		40	0	0	0	0	0	0	0	0	0	0	0	0	0	0	0	0	0	0	0	0	0	0	0	0

## Sheet: igure 1i
TRL APOB (AU/mL)
	ND cASO	ND APOC3 ASO	ND ANGPTL3 ASO	D cASO	D APOC3 ASO	D ANGPTL3 ASO
	1.59496	0.267143	0.982693	4.85157	1.1635	0.691374
	1.41238	0.397931	1.05811	1.6159	1.32293	4.48931
	0.792262	0.651485	0.397071	1.26892	2.872685*	3.20111
	0.570224	0.123494	0.712724	0.748129	1.41903	1.34801
	0.751124	0.350851	0.55764	3.59677	1.46336	1.08509
	1.18544	0.190781	0.358249	2.19412	1.24814	1.37814
	0.436871	0.292164	0.832963	2.31111	1.51581	2.07611
	2.5597	0.320439	0.468089	4.45162	0.639084	0.827109
n	8	8	8	8	7	8
Two-way ANOVA
Tukey's multiple comparisons test	Adjusted P Value
ND
APOC3 ASO vs. cASO	0.159
ANGPTL3 ASO vs. cASO	0.519
ANGPTL3 ASO vs. APOC3 ASO	0.72
D
APOC3 ASO vs. cASO	0.0133
ANGPTL3 ASO vs. cASO	0.232
ANGPTL3 ASO vs. APOC3 ASO	0.366
cASO
D vs. ND	0.00212
APOC3 ASO
D vs. ND	0.0513
ANGPTL3 ASO
D vs. ND	0.00953

[truncated: 81 more sheets: Figure 1j, Figure 1k, Figure 1l, Figure 1m, Figure 1n, Figure 2a, Figure 2b, Figure 2c, Figure 2d, Figure 2e, Ext Fig. 2a, Ext Fig. 2b, Ext Fig. 2c, Ext Fig. 2d, Ext Fig. 2e, Ext Fig. 2f, Ext Fig. 3a, Ext Fig. 3b, Ext Fig. 3c, Ext Fig. 3d …]
