# Supplementary material for: Elevated apolipoprotein C3 heightens atherosclerosis risk by mediating arterial accumulation of free cholesterol and local inflammation in diabetes
Source: Research Square preprint supplement (doi:10.21203/rs.3.rs-6979508/v1), 2025-07-16
Supplement: Supplementary file 6 [file f94a3da04ac021fced828bef.xlsx]

## Sheet: Read me
Data from scRNAseq early lesion
ND vs D (LCMV) (positive= increased in D)
ND vs D (STZ) (postive=increased in D)
cASO vs APOC3 ASO (postive = increased in APOC3)
DEG using FDR of 0.05 analyzed by Melissa Krueger (Sina Gharib)
Positive is INCREASED in diabetes/APOC3
All data sorted by LCMV with Z score over 2, followed by sorting STZ D with Z score over 2. Data then sorted by APOC3, and only Z-score of -2 was counted as "reversed"
After sorting for >2 (or -2) Z score, data was sorted based on p values (in LCMV model). Only data with p<0.05 shown in figures
Upstream regulators are analyzed the same way (cut off +/-2). Only data with BH adjusted p<0.05 is shown in figures

## Sheet: Resi_mac_IPA
	NDvsD (LCMV)						STZ_NDvD						LCMV_D3vDcASO					Shown in figure
	Ingenuity Canonical Pathways	-log(p-value)	Ratio	z-score	Molecules		Ingenuity Canonical Pathways	-log(p-value)	Ratio	z-score	Molecules		Ingenuity Canonical Pathways	-log(p-value)	Ratio	z-score	Molecules
Number of signficant pathways	Pathways increased by D and reversed by APOC3 ASO
1	Neutrophil degranulation	5.02	0.0819	2.402	ACLY,ADAM10,ADGRE5,ALDOA,ANO6,ARPC5,ATG7,ATP6V1D,B2M,C3,CD14,CD63,CD93,CFP,CLEC4D,CTSS,FUCA1,GDI2,GLA,GRN,HGSNAT,HK3,HSP90AA1,HSP90AB1,HSPA1A/HSPA1B,HSPA8,ITGAV,ITGB2,LGALS3,MMP9,NCKAP1L,PGM1,PKM,PLD1,PPIA,PSMD11,PTPRJ,SPTAN1,TUBB4B		Neutrophil degranulation	16.6	0.111	2.885	ALDOA,ASAH1,ATP8A1,B2M,BRI3,CD36,CD63,CD68,CFP,CST3,CSTB,CTSC,CTSH,CTSS,DEGS1,DOCK2,DYNLT1,FCGR3A/FCGR3B,FGL2,FTH1,FTL,GOLGA7,GRN,HGSNAT,HSP90AA1,HSP90AB1,HSPA1A/HSPA1B,HSPA8,IDH1,JUP,LAMP1,LAMTOR1,LGALS3,LRG1,LYZ,MAN2B1,MGST1,NME2,PGAM1,PKM,PLEKHO2,PPIA,PSAP,RHOA,RNASET2,SDCBP,SERPINB6,STOM,TIMP2,VAMP8,VAPA,VAT1,YPEL5		Neutrophil degranulation	7.27	0.084	-6.325	ARPC5,ATG7,ATP8A1,BIN2,BRI3,BST1,CD300A,CD36,CD44,CD93,CLEC12A,CTSC,CTSD,CTSH,CYBA,CYBB,CYFIP1,FCGR2A,FCGR3A/FCGR3B,FTH1,GMFG,GSDMD,GSN,HGSNAT,HVCN1,IDH1,LAIR1,LAMTOR1,LILRB3,NCKAP1L,PAFAH1B2,PGM1,PLD1,PRDX6,PSMD12,RHOG,RNASET2,SERPINB6,SPTAN1,SYNGR1	1
2	Plasma lipoprotein assembly, remodeling, and clearance	4.48	0.158	2.309	ABCA1,ABCG1,ANGPTL4,APOBR,APOC2,APOE,CLTA,HDLBP,MYLIP,NCEH1,SOAT1,UBC		Plasma lipoprotein assembly, remodeling, and clearance	1.18	0.0658	2.236	AP2S1,APOE,LIPA,LPL,RPS27A		Plasma lipoprotein assembly, remodeling, and clearance	4.46	0.145	-2.714	ABCA1,ABCG1,ANGPTL4,APOE,CLTC,LIPA,LPL,MYLIP,NCEH1,RPS27A,SOAT1	10
3	Actin Cytoskeleton Signaling	2.87	0.082	2.309	ACTB,APC,ARHGAP24,ARPC1B,ARPC5,CD14,FGF1,ITGA6,ITGAV,ITGB2,MYLK,NCKAP1L,PIK3CB,PIK3CG,PIK3R3,PXN,RAC2,SSH2,TLN1,VAV1		Actin Cytoskeleton Signaling	0.581	0.0369	3	ACTA2,ACTG2,CRK,MYH11,MYL9,PFN1,PIK3R6,RAC3,RHOA		Actin Cytoskeleton Signaling	3.8	0.082	-3.153	ACTB,ARPC1A,ARPC2,ARPC3,ARPC5,CFL2,CYFIP1,DOCK1,GNA12,GSN,ITGA4,MAPK3,NCKAP1L,PDGFB,PIK3CA,PIP5K1A,PXN,RAC2,TLN2,TRIO	8
4	Superpathway of Inositol Phosphate Compounds	2.67	0.0805	3.5	DUSP6,INPP5D,ITPKB,MTMR6,PIK3CB,PIK3CG,PIK3R3,PLCD1,PPFIA1,PPM1H,Ppp1cc,PPP1R10,PTPN11,PTPRJ,RASA1,RNGTT,SSH2,TNS3,WBP11		Superpathway of Inositol Phosphate Compounds	0.444	0.0339	2.121	NT5C,PALD1,PIK3R6,PPIP5K1,PPP1R14A,PPP1R14B,PTPN2,SGPP1		Superpathway of Inositol Phosphate Compounds	1.33	0.0551	-3.464	CDIPT,DOT1L,DUSP6,INPPL1,ITPKB,MTMR6,OCRL,PIK3CA,PIP5K1A,PPFIBP2,PPM1H,PTPN23,TNS3	4
5	Ephrin Receptor Signaling	2.65	0.0842	2.53	ADAM10,ARPC1B,ARPC5,CREBBP,CXCR4,EPHA6,FGF1,GNAS,GNG5,ITGA6,ITGAV,ITGB2,PIK3CG,PTPN11,PXN,RAC2,RASA1		Ephrin Receptor Signaling	1.51	0.0545	2.111	AKT1,CREB5,CRK,CXCR4,GNA15,GNAS,GNB5,GRINA,RAC3,RHOA,SDCBP		Ephrin Receptor Signaling	1.81	0.0644	-3.464	ARPC1A,ARPC2,ARPC3,ARPC5,CFL2,GNA12,GNAS,GNB1,ITGA4,MAPK3,PDGFB,PXN,RAC2	5
6	3-phosphoinositide Biosynthesis	2.51	0.0817	3.606	DUSP6,INPP5D,MTMR6,PIK3CB,PIK3CG,PIK3R3,PPFIA1,PPM1H,Ppp1cc,PPP1R10,PTPN11,PTPRJ,RASA1,RNGTT,SSH2,TNS3,WBP11		3-phosphoinositide Biosynthesis	0.613	0.0385	2.121	NT5C,PALD1,PIK3R6,PPIP5K1,PPP1R14A,PPP1R14B,PTPN2,SGPP1		3-phosphoinositide Biosynthesis	1.39	0.0577	-3.162	CDIPT,DOT1L,DUSP6,INPPL1,MTMR6,OCRL,PIK3CA,PIP5K1A,PPFIBP2,PPM1H,PTPN23,TNS3	7
7	Pancreatic Secretion Signaling Pathway	2.11	0.0729	3.3	ADCY9,ARHGEF10,ARHGEF11,CD38,GNAS,IRF2,ITPR2,PIK3CB,PIK3CG,PIK3R3,PLCD1,Ppp1cc,PPP1R10,PRKAG2,PRKCB,RASGRP3,RPTOR,WNK1		Pancreatic Secretion Signaling Pathway	1.93	0.0567	2.673	AKT1,BET1L,GNAS,LIPA,LPL,PIK3R6,PPP1R14A,PPP1R14B,PRKCB,PRKCE,PRKD3,RASGRP3,RHOA,SLC6A6		Pancreatic Secretion Signaling Pathway	2.49	0.0688	-3.153	ADCY9,ARHGDIA,ARHGDIB,BST1,CD38,DAGLB,GNA12,GNAS,LIPA,LPL,MAPK3,ORAI1,PIK3CA,PLCL1,RGS2,STX16,VTI1A	9
8	Protein Sorting Signaling Pathway	2.02	0.0787	3.207	ADCY9,AP1S2,CLTA,GNAS,PLD1,PRKAG2,SNX10,SNX24,SNX29,SORT1,TBC1D23,TMED10,TMED5,WASHC3		Protein Sorting Signaling Pathway	1.87	0.0618	2.111	GNAS,HCK,HMOX1,LYN,SCARB2,SNX2,SNX4,SORT1,TBC1D23,TMED2,VPS29		Protein Sorting Signaling Pathway	3.6	0.0899	-4	ADCY9,AP4M1,ARFGEF2,CLTC,GNAS,GOLGA4,KDELR2,PLD1,PLPP2,SNX17,SNX24,SNX6,TMED10,TMED9,VPS29,WASHC3	2
9	Integrin Signaling	1.74	0.0708	2.673	ACTB,ARPC1B,ARPC5,ITGA6,ITGAV,ITGB2,MYLK,PIK3CB,PIK3CG,PIK3R3,PXN,RAC2,RHOQ,TLN1,TSPAN4		Integrin Signaling	1.38	0.0519	3.162	ACTA2,ACTG2,AKT1,CRK,MYL9,PFN1,PIK3R6,RAC3,RHOA,RHOJ,TSPAN4		Integrin Signaling	5.18	0.0991	-3.771	ACTB,ARF3,ARHGAP5,ARPC1A,ARPC2,ARPC3,ARPC5,DOCK1,FNBP1,GSN,ITGA4,MAPK3,PDGFB,PIK3CA,PXN,RAC2,RHOC,RHOG,TLN2,TSPAN3,TSPAN4	3
10	Ephrin B Signaling	1.68	0.0972	2.449	CXCR4,GNAS,GNG5,ITSN2,PXN,RAC2,VAV1		Ephrin B Signaling	2.36	0.0972	2.449	CXCR4,GNA15,GNAS,GNB5,HNRNPK,RAC3,RHOA		Ephrin B Signaling	2.63	0.111	-2.236	CBL,CFL2,GNA12,GNAS,GNB1,MAPK3,PXN,RAC2	12
11	COPI-mediated anterograde transport	1.36	0.0784	2.121	BET1,COG5,COG6,SPTAN1,STX5,TMED10,TUBA1B,TUBB4B		COPI-mediated anterograde transport	0.479	0.0392	2	BET1L,CAPZA2,DCTN6,TMED2		COPI-mediated anterograde transport	3.91	0.118	-3.464	ARF3,ARFGAP3,BET1,CAPZB,COG6,KDELR2,RAB1B,SPTAN1,TMED10,TMED9,TUBB2A,USO1	6
	Electron transport, ATP synthesis, and heat production by uncoupling proteins	0	0.0312	2	COX7A2L,NDUFA12,TACO1,UCP2		Electron transport, ATP synthesis, and heat production by uncoupling proteins	1.52	0.0625	2.121	COX4I1,COX5A,NDUFA3,NDUFB10,NDUFB5,NDUFV2,TACO1,UQCRFS1		Electron transport, ATP synthesis, and heat production by uncoupling proteins	0.62	0.0469	-2.449	COQ10B,ETFA,ETFB,NDUFA5,NDUFB6,NDUFB8	11
	Pathways increased by D but not reversed by APOC3 ASO
12	Eukaryotic Translation Initiation	7.34	0.164	2.683	EIF3C,EIF3H,EIF5B,RPL12,RPL13A,RPL3,RPL35A,RPL4,RPL41,RPL5,RPL6,RPS12,RPS14,RPS17,RPS2,RPS23,RPS25,RPS28,RPS6,RPSA		Eukaryotic Translation Initiation	36	0.361	2.714	EIF3A,EIF3E,EIF3F,RPL10,RPL11,RPL13,RPL14,RPL15,RPL18,RPL18A,RPL19,RPL21,RPL3,RPL35,RPL37,RPL37A,RPL38,RPL39,RPL41,RPL6,RPL7,RPL8,RPL9,RPLP2,RPS10,RPS11,RPS12,RPS13,RPS15,RPS18,RPS19,RPS2,RPS21,RPS24,RPS27A,RPS28,RPS29,RPS3,RPS4Y1,RPS5,RPS6,RPS7,RPS8,RPS9		Eukaryotic Translation Initiation	9.37	0.172	4.146	EIF5B,FAU,RPL14,RPL18,RPL18A,RPL24,RPL30,RPL35,RPL35A,RPL37,RPL37A,RPL38,RPL39,RPL41,RPS15A,RPS18,RPS21,RPS26,RPS27A,RPS28,RPS29
13	Eukaryotic Translation Termination	6.97	0.181	2.183	RPL12,RPL13A,RPL3,RPL35A,RPL4,RPL41,RPL5,RPL6,RPS12,RPS14,RPS17,RPS2,RPS23,RPS25,RPS28,RPS6,RPSA		Eukaryotic Translation Termination	39	0.447	2.469	ETF1,RPL10,RPL11,RPL13,RPL14,RPL15,RPL18,RPL18A,RPL19,RPL21,RPL3,RPL35,RPL37,RPL37A,RPL38,RPL39,RPL41,RPL6,RPL7,RPL8,RPL9,RPLP2,RPS10,RPS11,RPS12,RPS13,RPS15,RPS18,RPS19,RPS2,RPS21,RPS24,RPS27A,RPS28,RPS29,RPS3,RPS4Y1,RPS5,RPS6,RPS7,RPS8,RPS9		Eukaryotic Translation Termination	10.7	0.213	4.472	FAU,RPL14,RPL18,RPL18A,RPL24,RPL30,RPL35,RPL35A,RPL37,RPL37A,RPL38,RPL39,RPL41,RPS15A,RPS18,RPS21,RPS26,RPS27A,RPS28,RPS29
14	Eukaryotic Translation Elongation	6.9	0.179	2.183	RPL12,RPL13A,RPL3,RPL35A,RPL4,RPL41,RPL5,RPL6,RPS12,RPS14,RPS17,RPS2,RPS23,RPS25,RPS28,RPS6,RPSA		Eukaryotic Translation Elongation	38.8	0.442	2.469	EEF1B2,RPL10,RPL11,RPL13,RPL14,RPL15,RPL18,RPL18A,RPL19,RPL21,RPL3,RPL35,RPL37,RPL37A,RPL38,RPL39,RPL41,RPL6,RPL7,RPL8,RPL9,RPLP2,RPS10,RPS11,RPS12,RPS13,RPS15,RPS18,RPS19,RPS2,RPS21,RPS24,RPS27A,RPS28,RPS29,RPS3,RPS4Y1,RPS5,RPS6,RPS7,RPS8,RPS9		Eukaryotic Translation Elongation	10.6	0.211	4.472	FAU,RPL14,RPL18,RPL18A,RPL24,RPL30,RPL35,RPL35A,RPL37,RPL37A,RPL38,RPL39,RPL41,RPS15A,RPS18,RPS21,RPS26,RPS27A,RPS28,RPS29
15	SRP-dependent cotranslational protein targeting to membrane	6.36	0.157	2.357	RPL12,RPL13A,RPL3,RPL35A,RPL4,RPL41,RPL5,RPL6,RPS12,RPS14,RPS17,RPS2,RPS23,RPS25,RPS28,RPS6,RPSA,SEC61A1		SRP-dependent cotranslational protein targeting to membrane	37.3	0.383	2.412	RPL10,RPL11,RPL13,RPL14,RPL15,RPL18,RPL18A,RPL19,RPL21,RPL3,RPL35,RPL37,RPL37A,RPL38,RPL39,RPL41,RPL6,RPL7,RPL8,RPL9,RPLP2,RPS10,RPS11,RPS12,RPS13,RPS15,RPS18,RPS19,RPS2,RPS21,RPS24,RPS27A,RPS28,RPS29,RPS3,RPS4Y1,RPS5,RPS6,RPS7,RPS8,RPS9,SEC61G,SRP9,SSR3		SRP-dependent cotranslational protein targeting to membrane	10.7	0.191	3.838	FAU,RPL14,RPL18,RPL18A,RPL24,RPL30,RPL35,RPL35A,RPL37,RPL37A,RPL38,RPL39,RPL41,RPN1,RPS15A,RPS18,RPS21,RPS26,RPS27A,RPS28,RPS29,SRP54
16	Nonsense-Mediated Decay (NMD)	6.25	0.154	2.357	RPL12,RPL13A,RPL3,RPL35A,RPL4,RPL41,RPL5,RPL6,RPS12,RPS14,RPS17,RPS2,RPS23,RPS25,RPS28,RPS6,RPSA,SMG6		Nonsense-Mediated Decay (NMD)	34.2	0.359	2.469	ETF1,RPL10,RPL11,RPL13,RPL14,RPL15,RPL18,RPL18A,RPL19,RPL21,RPL3,RPL35,RPL37,RPL37A,RPL38,RPL39,RPL41,RPL6,RPL7,RPL8,RPL9,RPLP2,RPS10,RPS11,RPS12,RPS13,RPS15,RPS18,RPS19,RPS2,RPS21,RPS24,RPS27A,RPS28,RPS29,RPS3,RPS4Y1,RPS5,RPS6,RPS7,RPS8,RPS9		Nonsense-Mediated Decay (NMD)	9.72	0.179	4.146	FAU,RPL14,RPL18,RPL18A,RPL24,RPL30,RPL35,RPL35A,RPL37,RPL37A,RPL38,RPL39,RPL41,RPS15A,RPS18,RPS21,RPS26,RPS27A,RPS28,RPS29,SMG6
17	Selenoamino acid metabolism	6.14	0.159	2.183	RPL12,RPL13A,RPL3,RPL35A,RPL4,RPL41,RPL5,RPL6,RPS12,RPS14,RPS17,RPS2,RPS23,RPS25,RPS28,RPS6,RPSA		Selenoamino acid metabolism	36.2	0.393	2.469	HNMT,RPL10,RPL11,RPL13,RPL14,RPL15,RPL18,RPL18A,RPL19,RPL21,RPL3,RPL35,RPL37,RPL37A,RPL38,RPL39,RPL41,RPL6,RPL7,RPL8,RPL9,RPLP2,RPS10,RPS11,RPS12,RPS13,RPS15,RPS18,RPS19,RPS2,RPS21,RPS24,RPS27A,RPS28,RPS29,RPS3,RPS4Y1,RPS5,RPS6,RPS7,RPS8,RPS9		Selenoamino acid metabolism	9.62	0.187	4.472	FAU,RPL14,RPL18,RPL18A,RPL24,RPL30,RPL35,RPL35A,RPL37,RPL37A,RPL38,RPL39,RPL41,RPS15A,RPS18,RPS21,RPS26,RPS27A,RPS28,RPS29
18	Major pathway of rRNA processing in the nucleolus and cytosol	4.95	0.113	2.837	DDX21,NCL,RIOK3,RPL12,RPL13A,RPL3,RPL35A,RPL4,RPL41,RPL5,RPL6,RPS12,RPS14,RPS17,RPS2,RPS23,RPS25,RPS28,RPS6,RPSA,TEX10		Major pathway of rRNA processing in the nucleolus and cytosol	26.1	0.231	2.592	EXOSC5,IMP3,RPL10,RPL11,RPL13,RPL14,RPL15,RPL18,RPL18A,RPL19,RPL21,RPL3,RPL35,RPL37,RPL37A,RPL38,RPL39,RPL41,RPL6,RPL7,RPL8,RPL9,RPLP2,RPS10,RPS11,RPS12,RPS13,RPS15,RPS18,RPS19,RPS2,RPS21,RPS24,RPS27A,RPS28,RPS29,RPS3,RPS4Y1,RPS5,RPS6,RPS7,RPS8,RPS9		Major pathway of rRNA processing in the nucleolus and cytosol	6.09	0.113	4.146	FAU,FCF1,RPL14,RPL18,RPL18A,RPL24,RPL30,RPL35,RPL35A,RPL37,RPL37A,RPL38,RPL39,RPL41,RPS15A,RPS18,RPS21,RPS26,RPS27A,RPS28,RPS29
19	Transcriptional regulation of white adipocyte differentiation	1.8	0.0952	2.828	ANGPTL4,CDK19,CDK8,CHD9,CREBBP,MED15,NCOA1,TBL1X		Transcriptional regulation of white adipocyte differentiation	1.48	0.0714	2.449	CD36,CEBPA,CEBPB,FABP4,LPL,MED22		Transcriptional regulation of white adipocyte differentiation	3.4	0.119	-0.632	ANGPTL4,CCND3,CD36,EGR2,KLF4,LPL,MED20,MED9,NCOA1,TNF
	Amino acids regulate mTORC1	1.22	0.0909	2.236	ATP6V1D,ATP6V1H,FNIP1,FNIP2,RPTOR		Amino acids regulate mTORC1	1.15	0.0727	2	ATP6V0B,ATP6V1F,ATP6V1G1,LAMTOR1		Amino acids regulate mTORC1	0.574	0.0545	NaN	ATP6V1A,LAMTOR1,RHEB
	Ion channel transport	0.385	0.0437	2.646	ANO6,ATP6V1D,ATP6V1H,CAMK2D,MCOLN1,UBC,WNK1,WWP1		Ion channel transport	1.1	0.0492	2.121	ATP6V0B,ATP6V1F,ATP6V1G1,ATP8A1,RPS27A,SGK1,STOM,TSC22D3,WWP1		Ion channel transport	0	0.0273	-1	ATP6V1A,ATP8A1,PDZD11,RPS27A,TSC22D3

## Sheet: Resi_mac_upstream_reg
	ResiMac_NDvsD (LCMV)									Resimac_NDvsD (STZ)									ResiMac_cASOvsAPOC3 (LCMV)
	Upstream Regulator	Expr Log Ratio	Molecule Type	Predicted Activation State	Activation z-score	p-value of overlap	B-H corrected p-value	Target Molecules in Dataset		Upstream Regulator	Expr Log Ratio	Molecule Type	Predicted Activation State	Activation z-score	p-value of overlap	B-H corrected p-value	Target Molecules in Dataset		Upstream Regulator	Expr Log Ratio	Molecule Type	Predicted Activation State	Activation z-score	p-value of overlap	B-H corrected p-value	Target Molecules in Dataset
Number of signficant pathways	Upstream regulators activated by D and reversed by APOC3 ASO
1	beta-estradiol		chemical - endogenous mammalian	Activated	2.74	3.62e-26	6.08e-23	4632427E13Rik,ABCA1,ACAA2,ACTB,ADCY9,ADNP,AFF4,ALDH2,ALDOA,ALG2,ANKRD12,APC,APOE,APP,ARPC1B,ARSG,ATF3,BCAS3,BCL2A1,BCL2L1,BCL2L11,C3,C4A/C4B,CACNA1D,CADM1,CASP4,CCL2,Ccl2,Ccl8,CCN2,CCR1,CCR2,CCR5,CD14,CD93,CDK6,CDKN1B,CFB,CLEC4D,CPT1A,CREBBP,CTNND1,CWC25,CXCL16,CXCL3,CXCR4,DUSP6,EGR1,ELF1,ELK3,Esrra,ETV3,ETV5,ETV6,FCGR2B,FEZ2,FGF1,FNIP1,FOS,FOSB,FOSL2,FOXO3,FRMD4B,FRS2,FUCA1,G6PD,GAB1,GAB2,GATAD2…		beta-estradiol		chemical - endogenous mammalian	Activated	3.461	4.7e-25	1.41e-22	1500009L16Rik,4632427E13Rik,ACTA2,AIF1,ALDOA,ANXA1,APOE,APP,ASAH1,ATF3,ATP6V1F,BATF,BAX,BCL2L1,BIN1,BIRC3,BSG,BTG2,CALR,CASP4,CAST,CCND2,CCR1,CD68,CD74,CD86,CDCA7,CEBPA,CEBPB,COX5A,CRK,CSTB,CTSH,CXCL10,CXCL13,CXCL16,CXCL3,CXCR4,DBP,DDIT3,DDIT4,DUSP3,EGR1,EIF3A,EIF3F,EMP1,ETV6,FABP4,FAM162A,FCGR2B,FCGRT,FGFR1,FOS,GLUL,GPRC5B,GPX3,GPX4,GTF2I,HCK,HDAC1,HES6,HGSNAT,HIVEP2,HLA-A,HLA-DQA1,HLA-DRB5,HMGB…		beta-estradiol		chemical - endogenous mammalian	Inhibited	-2.971	6.47e-11	1.34e-08	ABCA1,ABCA3,ACSL1,ACTB,ADCY9,AIF1,Akap9,ALG2,ALG5,ANKH,ANXA4,APOE,ASB2,BCL2A1,BCL2L11,BIN1,BLNK,Calm1 (includes others),CBL,CCND3,CCR1,CCR5,CD44,CD74,CD93,CDK6,CDKN1B,Cdkn1c,CELF2,CKB,CRIM1,CSF2RB,CTSD,CTSH,CXCL16,CYBB,CYTH4,DAB2,DDIT4,DLG1,DOCK1,DOT1L,DUSP6,EGR2,ELF1,ELK3,EMP1,ERF,Esrra,ETV6,FCGR2A,FGFR1,FNBP1,FRMD4B,FRS2,FSCN1,FZD5,GLUL,GMFB,GNB1,GNPTAB,GPR137B,GSN,HDAC2,HGSNAT,HIVEP3,HLA-A,HLA…
2	PPARG	1.454	ligand-dependent nuclear receptor	Activated	2.969	2.27e-15	5.44e-13	ABCA1,ABCG1,ACAA2,ACADL,ACLY,ACSL4,ADIPOR2,ALDH9A1,ANGPTL4,APOE,APP,ATP6V1D,BCL2L1,C3,CCL2,Ccl2,CCN2,CDK6,CDKN2C,CPT1A,CXCL3,FGF1,GDF15,HADHA,HES1,IGF1,IL1B,IRAK4,JUN,KLF6,LNPEP,MBNL1,MMP9,NCF1,NFE2L2,NPEPPS,NR4A1,NRF1,ODC1,PDE3B,PEA15,PF4,PFKFB3,PLIN2,POU2F1,Retnla,RPSA,SAP18,SAT1,SLC27A1,SLC27A4,SPP1,STAT5B,TAGLN,TCF4,TGFBR1,TGFBR2,TSLP,UCP2,VCAM1,VIM		PPARG	0.448	ligand-dependent nuclear receptor	Activated	2.595	2.21e-09	8.43e-08	ACTA2,APOE,APP,BAX,BCL2L1,BIN1,CD36,CD68,CEBPA,CEBPB,CXCL3,FABP4,GABARAPL2,HIVEP2,HMOX1,IDH1,IGF1,IGFBP7,IL1B,JUN,LAPTM4A,LPL,MGST1,MRC1,NCF1,NOX4,NR1D1,PDE3B,PF4,PID1,PPARD,RAB20,RARRES2,RGL1,SAT1,SGK1,SLC44A1,TAGLN,Tpm2,TSC22D3,VAMP8		PPARG	-0.215	ligand-dependent nuclear receptor	Inhibited	-2.191	3.94e-06	0.000176	ABCA1,ABCA3,ABCG1,ACSL1,ACSL4,ALDH9A1,ANGPTL4,APOE,BIN1,CD36,CDK6,Cdkn1c,CYBA,IDH1,IGF1,IL1B,KLF4,KLF6,LNPEP,LPL,MRC1,NDUFA5,NFE2L2,NPEPPS,NR4A1,PCTP,PDE3B,PEA15,PLIN2,Retnla,SLC27A1,TAGLN,TGFBR1,TNF,TRERF1,TSC22D3,ZNF703
3	alitretinoin		chemical drug	Activated	2.623	3.25e-09	1.39e-07	ABCA1,ABCC3,ABCG1,ADAM10,APP,BCL2A1,BCL2L1,CASP4,CCL24,CD14,CD38,CD83,CDKN1B,FOLR2,FOS,ISG15,MMP9,RUNX3,SLC27A1,SMAD1,SOAT1,SPP1,TGFBR1,TGFBR2,VIM		alitretinoin		chemical drug	Activated	2.331	0.000237	0.0018	APP,BCL2L1,CASP4,Ccl6,CD36,CD83,CD86,COX4I1,CXCL10,CXCL13,FABP4,FOS,PTGIS,TGFB2		alitretinoin		chemical drug	Inhibited	-2.807	0.000269	0.00476	ABCA1,ABCC3,ABCG1,BCL2A1,Ccl9,CCND3,CD36,CD38,CDKN1B,CYP4F2,IFNGR1,PLA2G15,SLC27A1,SOAT1,TGFBR1
4	medroxyprogesterone acetate		chemical drug	Activated	4.009	9.12e-07	1.87e-05	ALDH2,ALG2,ARPC1B,ARSG,BCL2L1,BCL2L11,CCL2,Ccl2,CCN2,CCR5,CDK6,CDKN1B,CXCR4,FGF1,GLA,GPX3,HDAC2,HGSNAT,HSP90B1,IGF1,IL1B,IL6ST,ITGA6,ITGAV,ITGB2,JUN,JUNB,LGMN,LIFR,MYLK,NPR1,ODC1,PDE3B,PXN,RAC2,SAT1,SMAD1,SMAD7,SPRED1,STAT5B,TBL1X		medroxyprogesterone acetate		chemical drug	Activated	2.579	7.34e-07	1.41e-05	ASAH1,BAX,BCL2L1,BIRC3,BTG2,CCND2,CD68,CEBPA,CXCL10,CXCR4,FGFR1,GLUL,GPX3,HES6,HGSNAT,HSP90B1,HTRA1,IGF1,IGFBP7,IL1B,JUN,LGMN,LIFR,LIPA,LMNA,MAOA,PDE3B,RALGDS,RARRES2,RUNX1,SAT1,SGK1,TGFB2,ZBTB16		medroxyprogesterone acetate		chemical drug	Inhibited	-2.947	8.82e-08	6.15e-06	ALG2,ALG5,BCL2L11,CCR5,CD44,CDK6,CDKN1B,CKB,CSF2RB,DOCK1,ENHO,FGFR1,FZD5,GLUL,GNPTAB,GSN,HDAC2,HGSNAT,IFNGR1,IGF1,IL1A,IL1B,IL6ST,ITGA4,LGMN,LIFR,LIPA,P4HA1,PDE3B,PDGFB,PTTG1,PXN,RAC2,RPN1,ST6GAL1,TLN2,TNF,WEE1,ZBTB16
5	GW3965		chemical reagent	Activated	2.383	7e-05	0.000718	ABCA1,ABCG1,APOE,APP,Ccl2,Ccl7,CD38,CX3CR1,IL1B,IRF8,MERTK,MMP9,MYLIP,PLIN2,RGS1		GW3965		chemical reagent	Activated	2.3	0.000197	0.00155	APOE,APP,Ccl7,CD86,CX3CR1,CXCL10,CYTH1,GNGT2,IL1B,LPL,NR1D1,PKIB		GW3965		chemical reagent	Inhibited	-2.295	1.01e-05	0.000358	ABCA1,ABCG1,APOE,CD38,CD80,CX3CR1,FAM3C,GATM,IL1B,IRF8,LPL,MICB,MYLIP,PLIN2,TNF
6	metribolone		chemical reagent	Activated	3.217	8.52e-05	0.000848	ACLY,ALDH9A1,ALDOA,APP,ATP6V1D,B2M,BCAP29,BCL2L1,CCR1,CDKN1B,COX7A2L,CXCR4,DBI,DNAJB9,EGR1,FKBP5,FOS,GDF15,GTPBP2,H1-0,HADH,HOMER1,HSPA5,HSPH1,IGF1,ITGA6,LIFR,MERTK,NPEPPS,PHYH,PKM,PMM2,PPIA,SAT1,SELENOP,TNFAIP8,TXNIP		metribolone		chemical reagent	Activated	3.119	3.19e-10	1.48e-08	ACSL3,ALDOA,APP,ATP6V0B,ATP6V1F,ATP6V1G1,B2M,BAX,BCL2L1,CCR1,COX17,COX4I1,COX5A,CTNND2,CXCR4,EGR1,FKBP5,FOS,HES6,HSPA5,IGF1,IGF1R,JPT1,LIFR,MAF,MAOA,MRPL34,NDUFA3,NDUFB10,NDUFB5,NDUFV2,PGAM1,PKM,PPIA,SAT1,SELENOP,TBC1D4,TIMP2,TM9SF2,TOMM22,TRPS1,UQCRFS1		metribolone		chemical reagent	Inhibited	-3.454	0.0106	0.0567	ALDH9A1,ANKH,ARL6IP1,B3GAT3,CCR1,CDKN1B,ETFA,FKBP5,FZD5,GOT1,HSD17B10,IGF1,LIFR,NDUFB8,NPEPPS,PHYH,PNKD,PRDX6,SELENOP,TBC1D4,TNF,TNFAIP8,TP53INP2,TSC22D1,UBE2J1,WEE1
	Upstream regulators inhibited by D and reversed by APOC3 ASO
7	miR-124-3p (and other miRNAs w/seed AAGGCAC)		mature microRNA	Inhibited	-4.111	5.21e-09	2.09e-07	ACAA2,ALDH9A1,ARPC1B,ARRDC1,CCL2,Ccl2,CCN2,CDK6,CTNND1,ECI2,EGR1,ELK3,ERN1,HADH,HES1,KLHL24,LGALS3,MAN2A1,MDFIC,MTMR6,PGM1,RBM47,RFFL,SERP1,SLC30A7,TLN1,TMEM248,TRIP11,TSKU,ZFP36L2		miR-124-3p (and other miRNAs w/seed AAGGCAC)		mature microRNA	Inhibited	-2.118	0.0151	0.0454	CDCA7,CEBPA,CERS2,DDIT3,EGR1,HTATIP2,LGALS3,NECAP2,SERP1,SERPINB6,STOM,VCF1,ZFP36L2		miR-124-3p (and other miRNAs w/seed AAGGCAC)		mature microRNA	Activated	4.073	0.00142	0.0157	ALDH9A1,ARRDC1,CDK6,CHST14,ELK3,ENDOD1,GSN,MTMR6,PGM1,PLSCR3,RBM47,RFFL,RHOG,SERPINB6,SYNGR2,TMEM248,UHMK1
8	miR-1-3p (and other miRNAs w/seed GGAAUGU)		mature microRNA	Inhibited	-2.47	1.03e-05	0.000149	ARID2,AXL,CXCR4,DDX5,DNAJB1,G6PD,IGF1,LRP1,MEF2A,NRP1,PICALM,PREX1,RBM47,SERP1,SH3PXD2B,SHTN1,TAGLN2,Tmsb4x (includes others),TRIM2,TSPAN4,UNC93B1		miR-1-3p (and other miRNAs w/seed GGAAUGU)		mature microRNA	Inhibited	-2.512	1.72e-06	2.89e-05	ADAR,CDK14,CERS2,CORO1C,CTSC,CXCR4,DDX5,GOLGA7,H3-3A/H3-3B,IGF1,LIN7C,MXD4,PLEKHB2,RNF138,SERP1,SLC44A1,SRSF9,TRAPPC3,TSPAN4		miR-1-3p (and other miRNAs w/seed GGAAUGU)		mature microRNA	Activated	3.962	0.000388	0.00624	ARF3,AXL,BLCAP,Calm1 (includes others),CDK14,CTSC,GNPDA2,IGF1,LARP4,LASP1,RBM47,SNX6,Tmsb4x (includes others),TSPAN4,UHMK1,UST
	Upstream regulators activated by D but not reversed by APOC3 ASO
9	NFE2L2	0.229	transcription regulator	Activated	3.621	1.23e-12	1.29e-10	ABCC3,ALAS1,ALDOA,ATF3,ATF7,ATG7,B2M,BCL2L1,C3,Ccl2,CCN2,CDKN2C,CPT1A,CXCL3,DDX6,EIF3C,ETV6,FKBP5,FOXO3,G6PD,Ggta1,GPX1,GPX3,GSTO1,HIPK2,HLA-A,HLA-E,HM13,HSP90AA1,HSP90AB1,HSP90B1,IFIT1B,IFNGR2,IL1B,IL6ST,ISG15,MITF,MMP9,Mt1,NBR1,NCF1,NFE2L2,NIPBL,PFKFB3,PLIN2,PRKCB,PSMC1,PSMD11,PSMD4,RBM6,RSF1,SAT1,SEC61A1,SERINC3,TALDO1,UBC,UBE2K,Uty,VCAM1		NFE2L2	-0.241	transcription regulator	Activated	4.48	7.26e-16	8.36e-14	AKR1A1,ALDOA,ANG,ATF3,B2M,BCL2L1,CD36,CD86,CEBPA,CFH,COX4I1,CXCL10,CXCL3,DDIT3,DSTN,EIF3E,EIF4G2,ETV6,FABP4,FKBP5,FTH1,FTL,GPX3,GPX4,GSTM5,HLA-A,HMOX1,HSP90AA1,HSP90AB1,HSP90B1,HTATIP2,IDH1,IFIT1B,IL1B,IRF9,LAMP1,LMNA,LPL,LY6E,MAP1LC3B,MEF2C,MGST1,NCF1,NLRP3,PDIA6,PRDX1,PRKCB,RPL18,SAT1,SERINC3,SLC30A4,TCN2,TGFB2,TMED2,UBA2		NFE2L2	-0.339	transcription regulator		-1.971	0.00221	0.0213	ABCC3,ARHGAP5,ATG7,Calm1 (includes others),Ccl9,CCT3,CD36,CELA1,CTSD,CYBB,ETV6,FKBP5,FTH1,GOT1,GSTT2/GSTT2B,HAX1,HLA-A,IDH1,IL1A,IL1B,IL6ST,LPL,Mt1,NFE2L2,P2RX4,PLIN2,PSMD12,RPL18,TALDO1,TNF,USO1
10	PNPT1	-0.214	enzyme	Activated	3.404	5.29e-08	1.65e-06	BCL2L1,Bst2,CDKN1B,IFI16,IFIT1B,IFIT3,Irgm1,ISG15,Oasl2,PARP14,RNF213,RTP4,USP18		PNPT1	-0.663	enzyme	Activated	2.967	1.67e-06	2.83e-05	BCL2L1,CXCL10,IFI16,IFIT1B,IFIT3,LGALS3BP,OAS1,Oasl2,PARP14,Trim30a/Trim30d		#N/A	#N/A	#N/A	#N/A	#N/A	#N/A	#N/A	#N/A
11	SN-011		chemical reagent	Activated	3.317	4.42e-05	0.000495	Bst2,CCL2,IFIT3,IFITM3,ISG15,LGALS9B,MCL1,OAS2,RTP4,USP18,ZBP1		SN-011		chemical reagent	Activated	3.576	4.49e-08	1.23e-06	ADAR,CXCL10,FCGR1A,IFIT3,IFITM3,IRF9,LY6E,OAS1,OAS2,SLFN5,TANK,TAP1,TRIM25		#N/A	#N/A	#N/A	#N/A	#N/A	#N/A	#N/A	#N/A
12	USP8	0.083	peptidase	Activated	3.238	3.36e-08	1.12e-06	APP,B2M,Bst2,Ccl2,Ccl7,HLA-A,IFI16,IFIT1B,IFIT3,IFITM3,Irgm1,ISG15,OAS2,Oasl2,TGFBR2		USP8	0.5	peptidase	Activated	3.269	6.23e-10	2.7e-08	APP,B2M,CALR,Ccl7,CXCL10,HLA-A,IFI16,IFIT1B,IFIT3,IFITM3,OAS1,OAS2,Oasl2,PSMB8,TAP1		#N/A	#N/A	#N/A	#N/A	#N/A	#N/A	#N/A	#N/A
13	TO-901317		chemical reagent	Activated	3.086	7.48e-08	2.24e-06	ABCA1,ABCG1,ACLY,ADIPOR2,ALAS1,ALDH2,APOC2,APOE,APP,BCL2L1,C3,CASP4,CCL2,Ccl2,CCL24,CDKN1B,CPT1A,G6PD,IGF1,IL1B,ITGA6,LGALS3,LIFR,MMP9,MPEG1,Mt1,PFKFB3,Scd2		TO-901317		chemical reagent	Activated	2.471	3.61e-05	0.000373	APOE,APP,BCL2L1,CASP4,CFH,COX17,FABP4,GSTM5,HNRNPK,IGF1,IL1B,LGALS3,LIFR,LPL,LTC4S,MPEG1,NR1D1,PSMB8,PSME1		TO-901317		chemical reagent		-1.336	0.00829	0.0485	ABCA1,ABCG1,ACSL1,APOE,Ccl9,CDKN1B,IGF1,IL1B,LIFR,LPL,LTC4S,MPEG1,Mt1,Mt2,TNF
14	MLXIPL		transcription regulator	Activated	3.032	3.91e-10	2.17e-08	ACLY,ADGRE1,ADIPOR2,Ccl2,CPT1A,RPL12,RPL13A,RPL3,Rpl32,RPL35A,RPL4,RPL41,RPL5,RPL6,Rplp1 (includes others),RPS12,RPS14,RPS17,RPS2,RPS23,RPS25,RPS28,RPS6,RPSA,TXNIP		MLXIPL		transcription regulator	Activated	2.48	8.71e-44	1.71e-40	ADGRE1,CEBPA,FABP4,MRC1,NR1D1,PNPLA2,RPL10,RPL11,RPL13,RPL14,RPL15,RPL18,RPL18A,RPL19,RPL21,Rpl22l1,Rpl29 (includes others),RPL3,RPL35,Rpl36a,RPL37,RPL37A,RPL38,RPL39,RPL41,RPL6,RPL7,RPL8,RPL9,Rplp1 (includes others),RPLP2,RPS10,RPS11,RPS12,RPS13,RPS15,RPS18,RPS19,RPS2,RPS21,RPS24,Rps27/Rps27rt,RPS27A,RPS28,RPS29,RPS3,Rps3a1,RPS4Y1,RPS5,RPS6,RPS7,RPS8,RPS9		MLXIPL		transcription regulator	Activated	4.69	4.2e-10	6.21e-08	MRC1,RPL14,RPL18,RPL18A,RPL24,RPL30,RPL35,RPL35A,Rpl36,RPL37,RPL37A,RPL38,RPL39,RPL41,RPS15A,RPS18,RPS21,RPS26,Rps27/Rps27rt,RPS27A,RPS28,RPS29,Rps3a1
15	NR1H3	0.569	ligand-dependent nuclear receptor	Activated	3.023	1.28e-11	1.11e-09	ABCA1,ABCG1,ADGRE1,APOC2,APOE,ARL4C,ATF3,BCL2L1,Bst2,CCL2,Ccl2,CCL24,Ccl7,Ccl8,CCR1,CCR2,CCR5,CD38,CDKN1B,CFB,CX3CR1,CXCL16,GPX1,GPX3,IL1B,IRF8,MERTK,MMP9,Mt1,MYLIP,RPS14,Scd2,UBC,ZBP1		NR1H3	-0.204	ligand-dependent nuclear receptor	Activated	2.068	1e-08	3.24e-07	ACSL3,ACTA2,ADGRE1,APOE,ATF3,BCL2L1,C1QA,Ccl7,CCR1,CD68,CTSC,CX3CR1,CXCL10,CXCL16,CYTH1,FCGR1A,FGL2,GAS6,GNGT2,GPX3,GSTM5,IL1B,LPL,LYZ,TAP1		NR1H3	0.299	ligand-dependent nuclear receptor		-1.792	4.56e-07	2.67e-05	ABCA1,ABCG1,APOE,ARL4C,CCR1,CCR5,CD38,CDKN1B,CTSC,CX3CR1,CXCL16,EBI3,FAM3C,FCGR1A,GPR132,IL1B,IRF8,LAIR1,LPL,Mt1,Mt2,MYLIP,TAP1,TNF
16	1,2-dithiole-3-thione		chemical reagent	Activated	3.012	8.95e-05	0.000883	ABCC3,ALAS1,ALDOA,ATF7,DNAJB9,EIF3C,ETV6,FKBP5,HM13,HSP90AA1,HSP90AB1,HSP90B1,NBR1,NFE2L2,PSMC1,PSMD11,PSMD4,SEC61A1,SERINC3,UBE2K		1,2-dithiole-3-thione		chemical reagent	Activated	2.273	1.49e-08	4.68e-07	AKR1A1,ALDOA,ANG,DSTN,EIF3E,EIF4G2,ETV6,FKBP5,FTH1,GSTM5,HMOX1,HSP90AA1,HSP90AB1,HSP90B1,HTATIP2,LMNA,LPL,LY6E,PDIA6,PRDX1,RPL18,SERINC3,TMED2		1,2-dithiole-3-thione		chemical reagent		-1.376	0.00224	0.0215	ABCC3,CCT3,CELA1,CTSD,ETV6,FKBP5,FTH1,GSTT2/GSTT2B,HAX1,LPL,NFE2L2,P2RX4,PSMD12,RPL18,USO1
17	PPARGC1A		transcription regulator	Activated	2.824	2.16e-06	3.94e-05	ABCA1,ACADL,ADGRG1,ALAS1,APOC2,C3,Ccl2,Ccl7,CCN2,CPT1A,ELMO1,Esrra,FOS,GDF15,GPX1,IGF1,IL1B,LGALS9B,LIFR,MAP3K1,MBP,MITF,NCEH1,NFKBIZ,NR4A1,NRF1,ODC1,PACSIN2,PHYH,PLA2G7,PLIN2,RECQL,RPGRIP1,SEMA3C,Sik1,SMAD7,STAT5B,TCF4,TNFRSF12A,UCP2,VCAM1		PPARGC1A		transcription regulator	Activated	2.168	5.68e-07	1.15e-05	ANG,BAX,Ccl7,CD36,CD68,CEBPA,CEBPB,CFH,COX4I1,COX5A,CTSC,CXCL10,FABP4,FOS,GAS6,HMOX1,IGF1,IGFBP7,IL1B,IRAK1,LIFR,LIPA,LPL,MFAP5,NDUFB5,NDUFV2,NFKB2,NFKBIZ,NLRP3,PGAM1,PLA2G7,PNPLA2,S100A1,TIMP2,UQCRFS1		PPARGC1A		transcription regulator		-1.224	0.0158	0.0736	ABCA1,CASP8,CD36,CTSC,DOCK1,Esrra,IGF1,IL1A,IL1B,IMPA1,LIFR,LIPA,LPL,MAP2K6,MAP3K1,NCEH1,NDUFB8,NFKBIZ,NR4A1,PHYH,PLA2G7,PLIN2,S100A1,SLC25A25,TNF
18	Ttc39aos1		other	Activated	2.755	6.02e-08	1.85e-06	BCL2A1,Ccl2,Ccl7,IFI16,IFIT3,IFITM3,IL1B,ISG15,OAS2,PARP14,PHF11,RNF213,RTP4,USP18		Ttc39aos1		other	Activated	3.846	1.3e-10	6.42e-09	Ccl7,CXCL10,IFI16,IFIT3,IFITM3,Igtp,IL1B,IRF9,LGALS3BP,LY6E,OAS2,PARP14,SLC15A3,TAP1,Trim30a/Trim30d		#N/A	#N/A	#N/A	#N/A	#N/A	#N/A	#N/A	#N/A
19	daidzein		chemical drug	Activated	2.724	1.46e-05	0.000201	ABCA1,ABCC3,ABCG1,APOE,CCL2,FCGR2B,FOSB,HLA-A,ITGB2,NCOA1,NFE2L2,OGDH,OSBPL3,ZEB2		daidzein		chemical drug	Activated	2.143	1.57e-05	0.00019	AIF1,APOE,BAX,CD86,EVI2A,FCGR2B,Fcna,HLA-A,HLA-DQA1,HMOX1,PKIB,ZEB2		daidzein		chemical drug		-1.29	5.5e-05	0.00141	ABCA1,ABCC3,ABCG1,AIF1,APOE,EVI2A,HLA-A,HLA-DQA1,NCOA1,NFE2L2,OGDH,ZEB2
20	Irgm1	-1.345	enzyme	Activated	2.712	1.64e-05	0.000223	B2M,Ccl2,CXCL16,IFI16,Ifi27l2a/Ifi27l2b,IFIT1B,IFIT3,IFITM3,IL1B,ISG15,OAS2,Oasl2,USP18,ZBP1		Irgm1	-0.181	enzyme	Activated	3.774	2.01e-10	9.58e-09	APOBEC3B,B2M,CXCL10,CXCL13,CXCL16,IFI16,Ifi27l2a/Ifi27l2b,IFIT1B,IFIT3,IFITM3,IL1B,IRF9,NUPR1,OAS1,OAS2,Oasl2,TRIM25,Trim30a/Trim30d		Irgm1	-0.028	enzyme		0.825	0.0354	0.111	CXCL16,GSDMD,IFI16,Ifi27l2a/Ifi27l2b,IL1A,IL1B,TNF
21	NCOR1	0.304	transcription regulator	Activated	2.646	0.0016	0.00888	CDKN1B,IFIT1B,IFIT3,IKZF1,IL1B,ISG15,MMP9,OAS2,Oasl2,TSLP,ZBP1		NCOR1	-0.13	transcription regulator	Activated	2.351	0.000135	0.00113	CEBPA,CXCL10,IFIT1B,IFIT3,IL1B,LYZ,NR1D1,OAS1,OAS2,Oasl2,PIM1		#N/A	#N/A	#N/A	#N/A	#N/A	#N/A	#N/A	#N/A
22	amino acids		chemical - endogenous mammalian	Activated	2.567	1.49e-05	0.000204	ACTB,FOS,FOSB,IGF1,JUN,JUNB,ODC1,RPS6		amino acids		chemical - endogenous mammalian	Activated	2.171	0.0016	0.00825	DDIT3,FOS,IGF1,JUN,RPS6		#N/A	#N/A	#N/A	#N/A	#N/A	#N/A	#N/A	#N/A
23	PLCG2	0.313	enzyme	Activated	2.512	1.59e-13	2.26e-11	ACSL4,APOE,BCL2A1,CCL2,Ccl2,Ccl7,Ccl8,CD63,CX3CR1,DGKZ,HLA-A,HLA-DRB5,IFI16,IFIT1B,IFIT3,IFITM3,ISG15,MS4A4A,Ms4a6b,PLIN2,SPP1,TREM2		PLCG2	-0.34	enzyme	Activated	2.943	3.73e-16	4.79e-14	ACSL3,APOE,C1QA,Ccl7,CD36,CD63,CD68,CD74,CD9,CX3CR1,CXCL10,HLA-A,HLA-DQA1,HLA-DRB5,IFI16,IFIT1B,IFIT3,IFITM3,LIPA,LPL,Ms4a6b,TREM2		PLCG2	0.075	enzyme		-1.983	6.57e-12	2.05e-09	ACSL1,ACSL4,APOE,BCL2A1,CD36,CD74,CTSD,CX3CR1,DAGLB,DGKZ,HLA-A,HLA-DQA1,HLA-DRB5,IFI16,LIPA,LPL,PLIN2,TNF,TREM2
24	genistein		chemical drug	Activated	2.493	3.33e-11	2.52e-09	ALAS1,ANGPTL4,AP1S2,ARSG,ATP6V1H,BCL2L1,C3,CCL2,Ccl2,CCN2,CCR2,CX3CR1,CXCL3,FCGR2B,FOS,FUCA1,GABARAP,GDF15,GPX1,HEXA,HLA-A,HPGD,HSPA1A/HSPA1B,HSPA5,IGF1,IL1B,ITGB2,JUN,JUNB,JUND,LGMN,MAP3K1,MCOLN1,MMP9,Mt1,NFE2L2,OGDH,OSBPL3,PLA2G7,POLR2A,SORT1,SPP1,TAGLN,VCAM1,VPS11,ZEB2		genistein		chemical drug	Activated	2.522	9.01e-16	1.01e-13	ASAH1,ATP6V0B,ATP6V1G1,BAX,BCL2L1,CD68,CD74,CD86,CEBPA,CTSH,CX3CR1,CXCL10,CXCL3,EVI2A,EXT1,FCGR2B,Fcna,FOS,HLA-A,HLA-DQA1,HMOX1,HPGD,HS3ST3A1,HSPA1A/HSPA1B,HSPA5,IGF1,IGF1R,IL1B,JUN,KDSR,LAMP1,LGMN,LIPA,LPL,MAN2B1,MAOA,NAGPA,PIM1,PKIB,PLA2G7,POLR2A,PSAP,SCARB2,SORT1,TAGLN,ZEB2		genistein		chemical drug		-1.23	3.41e-07	2.07e-05	ACP2,ANGPTL4,ATP6V1A,CD44,CD74,CD80,CHST14,CTSD,CTSH,CX3CR1,CYP4F2,EVI2A,GNPTAB,HLA-A,HLA-DQA1,HPGD,HS2ST1,IGF1,IL1B,JUND,LGMN,LIPA,LPL,MAP3K1,Mt1,NFE2L2,OGDH,PLA2G15,PLA2G7,PLBD2,TAGLN,TNF,WEE1,ZEB2
25	SU6656		chemical toxicant	Activated	2.449	0.000336	0.00259	ATF3,Ccl2,Ccl7,CCN2,EGR1,JUNB,Mt1		SU6656		chemical toxicant	Activated	2	0.0175	0.0516	ATF3,Ccl7,DDIT3,EGR1		SU6656		chemical toxicant		0.447	0.00534	0.0366	Mt1,Mt2,NR4A2,PHLDA1,ZFP36L1
26	PGR		ligand-dependent nuclear receptor	Activated	2.402	0.00214	0.0113	ARNT,BCL2L1,CADM1,CDKN1B,COL14A1,DDX21,DPYSL2,EIF5B,EP400,FKBP5,FOS,HES1,HPGD,IFI16,IFIT3,ISG15,ITGA6,LDLRAD4,MAT2A,MMP9,NRP1,OAS2,PFKFB3,PHF21A,PPM1H,RHOQ,S100A6,SELENOP,STAT5B,TRAF5,VCAM1		PGR		ligand-dependent nuclear receptor	Activated	3.15	0.000182	0.00146	BCL2L1,BIRC3,CD36,CEBPA,CEBPB,FAM89B,FKBP5,FOS,GAS6,GLUL,GRK4,HPGD,IFI16,IFIT3,KLF9,MFAP5,OAS1,OAS2,PHF21A,RAD51B,RASGRP2,RUNX1,S100A6,SELENOP,SGK1,TGFB2,TGFBI,TSC22D3		PGR		ligand-dependent nuclear receptor		-0.693	0.000646	0.00898	ACSL1,ADAM19,CCND3,CD36,CD44,CDKN1B,CTBS,CTSD,EIF5B,EP400,FKBP5,GLUL,GOT1,GPR160,HPGD,IFI16,ITGA4,KLF4,KLF9,LCP1,P2RX4,PDGFB,PPM1H,RHOC,SELENOP,SRSF7,TGFBI,TNF,TSC22D3
27	dexamethasone		chemical drug	Activated	2.387	1.25e-25	1.5e-22	ABCA1,ABCC3,ACADL,ACLY,ACSL4,ACTB,ADAM10,ADAM9,ALAS1,ALDH2,ANGPTL4,APOE,APP,ARHGAP24,ARHGAP25,ARL4C,ARL5B,ATF3,B2M,BCL2A1,BCL2L1,BCL2L11,C3,CASP4,CBLB,Cbr2,CCL2,Ccl2,Ccl7,CCN2,CCR1,CCR2,CD14,CD38,CD83,CDKN1B,CDKN2C,CDYL,CFB,CLEC4D,CPSF3,CRIP1,CX3CR1,CXCL3,CXCR4,DAPK1,DHRS7,DNM1L,EDNRB,EGR1,EIF4G3,ERBIN,ETV5,FCGR2B,FGF1,FKBP5,FOS,FOSB,FOSL2,FOXO3,G6PD,GAB1,GDF15,GPX1,GRK5,GRN,GTF2IRD1,HDAC2,HES1,H…		dexamethasone		chemical drug	Activated	4.741	3.77e-32	2.11e-29	ACSL3,ACTA2,ACTG2,AIF1,AKT1,ANXA1,APOE,APP,ATF3,B2M,BATF,BAX,BCL2L1,BIRC3,BSG,BTG2,C9orf72,CALR,CASP4,CAST,Ccl7,CCND2,CCR1,CD163,CD36,CD74,CD83,CD86,CDV3,CEBPA,CEBPB,CMKLR1,COQ8B,COX4I1,Cox7c,CST3,CTSC,CX3CR1,CXCL10,CXCL3,CXCR4,DCTN6,DDIT3,DDIT4,DLC1,EDNRB,EGR1,ENTPD1,ETF1,EXT1,FABP4,FAM89B,FCGR1A,FCGR2B,FGL2,FKBP5,FOS,FTH1,FTL,GAS6,GLUL,GNB5,GNGT2,GPR34,GPR65,GRINA,GRN,GSTM5,GTF2I,HDAC1,HLA-A,HL…		dexamethasone		chemical drug	Activated	2.283	1.11e-11	3.05e-09	ABCA1,ABCC3,ACSL1,ACSL4,ACTB,AIF1,ALOX5AP,ANGPTL4,APOE,ARHGAP25,ARHGDIA,ARL4C,BCL2A1,BCL2L11,BEX3,Calm1 (includes others),CASP8,Cbr2,CCND3,CCR1,CD36,CD38,CD44,CD74,CD80,CDKN1B,Cdkn1c,CELF2,CEP135,CLIC1,CRIP1,CSF2RB,CTSC,CTSD,CX3CR1,CYBB,CYP27A1,DAPP1,DDIT4,DLG1,EGR2,ENTPD1,EPSTI1,ETFA,EVL,FCGR1A,FKBP5,FSCN1,FTH1,GCC2,GLUL,GOT1,GPR34,HDAC2,HLA-A,HLA-DQA1,HLA-DQB1,HLA-DRB5,HPGD,HPGDS,IDH1,Ifi27l2a/…
28	NR1H (family)		group	Activated	2.25	2.02e-05	0.000269	ABCA1,ABCG1,ACADL,ACLY,APOC2,APOE,C3,CCL2,Ccl2,CCR2,CCR5,FGF1,IL1B,MARCKSL1,MERTK,MYLIP,NFKBIZ,RUNX3		NR1H (family)		group	Activated	2.602	0.00011	0.000949	ACSL3,APOE,CCND2,CXCL10,HCK,IL1B,LPL,MARCKSL1,NFKB2,NFKBIZ,NLRP3,SLC8A1,TAP1,ZBTB16		NR1H (family)		group		-0.439	0.00377	0.0297	ABCA1,ABCG1,APOE,CCR5,IL1B,LPL,MYLIP,NFKBIZ,SLC8A1,TAP1,TNF,ZBTB16
29	THRA	0.108	ligand-dependent nuclear receptor	Activated	2.218	0.0104	0.0374	ANGPTL4,APP,CCL2,Ccl2,CDKN1B,CIRBP,CPT1A,CXCL3,Esrra,FOS,IGF1,IL1B,JUN,MBP,NCF1,UCP2		THRA	0.03	ligand-dependent nuclear receptor	Activated	2.064	8.23e-08	2.1e-06	APP,CEBPA,COX4I1,CTSH,CXCL10,CXCL3,FGFR1,FOS,GPD1L,GPX4,HMOX1,IGF1,IL1B,JUN,JUP,KLF9,LAMP1,LPL,NCF1,NLRP3,NME1,NOX4,SLC8A1		THRA	-0.216	ligand-dependent nuclear receptor		-0.197	0.000293	0.00507	Akap9,ANGPTL4,Calm1 (includes others),CASP8,CD44,CDKN1B,CTSD,CTSH,Esrra,FGFR1,IGF1,IL1A,IL1B,KLF9,LPL,PTTG1,SLC8A1,TNF
30	L-triiodothyronine		chemical - endogenous mammalian	Activated	2.169	0.000562	0.00393	ABCA1,ACTB,ADCY9,APOC2,APP,BCL2L1,BCL2L11,C4A/C4B,Cbr2,CCN2,CDKN1B,CPT1A,EGR1,FOLR2,FOS,G6PD,GDF15,GPCPD1,HOMER1,IGF1,ITGAV,LGALS3,LRP1,MBP,MMP9,NR4A1,ODC1,RPS14,RREB1,Scd2,SLC27A1,SLC43A2,SMAD7,SNX29,TMF1,TRNT1,TSKU,UCP2		L-triiodothyronine		chemical - endogenous mammalian	Activated	2.067	6.16e-06	8.49e-05	ACTG2,APP,BAX,BCL2L1,BTG2,Ccl6,CD36,CEBPA,CMKLR1,COX4I1,COX5A,Cox6c,CST3,CTSH,DBP,EGR1,ETF1,FABP4,FGFR1,FKBP7,FOS,GPD1L,HINT1,IGF1,IGF1R,JUP,KLF9,LGALS3,LMNA,LYZ,NME1,NR1D1,PTGIS,RAB34,RREB1,SLC8A1		L-triiodothyronine		chemical - endogenous mammalian		0.235	0.0279	0.0994	ABCA1,ACOT2,ACSL1,ACTB,ADCY9,BCL2L11,Calm1 (includes others),Cbr2,CD36,CD44,CDKN1B,COQ10B,CTSH,EGR2,FGFR1,HINT1,IGF1,IL4I1,KLF9,NR4A1,PTTG1,RGS2,RREB1,SLC27A1,SLC8A1,ST6GAL1,TNF
31	TRIM24	0.366	transcription regulator	Activated	2.164	1.77e-05	0.000238	Bst2,EMB,EPHA6,Ifi27l2a/Ifi27l2b,IFIT1B,IFIT3,IFNGR2,Irgm1,ISG15,LGALS3,PACSIN3,PHF11,RTP4,SPP1,USP18		TRIM24	-0.45	transcription regulator	Activated	2.534	1.37e-05	0.00017	CXCL10,GLUL,Ifi27l2a/Ifi27l2b,IFIT1B,IFIT3,Igtp,IRF9,LGALS3,LGALS3BP,OAS1,PSMB8,TAP1,TGFBI		TRIM24	-0.136	transcription regulator		0.853	0.00891	0.0499	BLNK,CALHM6,EPSTI1,GLUL,Ifi27l2a/Ifi27l2b,IFNGR1,PIK3CA,TAP1,TGFBI
32	ACOD1		enzyme	Activated	2.121	3.76e-05	0.000438	Ccl2,Ifi27l2a/Ifi27l2b,IL1B,ISG15,NFE2L2,RNF213,SPP1,TIMD4		ACOD1		enzyme	Activated	2.828	4.4e-06	6.4e-05	AIF1,CD86,CXCL10,Ifi27l2a/Ifi27l2b,IL1B,MRC1,SGK1,TAP1		ACOD1		enzyme		1.463	1.13e-05	0.000392	AIF1,CD80,Ifi27l2a/Ifi27l2b,IL1B,MRC1,NFE2L2,TAP1,TNF
33	EHMT1	0.098	enzyme	Activated	2.111	0.00112	0.00687	ALDH2,C3,CD38,CDKN2C,GTF2IRD1,MAN1C1,MLH1,MSRB1,NUB1,PLIN2,SAT1,SCMH1		EHMT1	-0.217	enzyme	Activated	2	0.387	0.414	GRINA,MGST1,MSRB1,SAT1		#N/A	#N/A	#N/A	#N/A	#N/A	#N/A	#N/A	#N/A
34	SOCS3	-0.287	phosphatase	Activated	2.099	0.00512	0.0215	ABCA1,ATF3,Ccl2,EGR1,FOS,IL1B,IRF8,JUN,OAS2,VIM		SOCS3	0.034	phosphatase	Activated	2.445	0.000582	0.00377	ATF3,CD86,CXCL10,EGR1,FCGR1A,FOS,IL1B,JUN,OAS1,OAS2		#N/A	#N/A	#N/A	#N/A	#N/A	#N/A	#N/A	#N/A
35	FOSL1	0.375	transcription regulator	Activated	2.062	6.99e-06	0.000106	AXL,CCL2,Ccl2,Ccl7,Ccl8,EGR1,FOS,FOSB,HPGD,IL1B,JUN,JUNB,MMP9,NRP1		FOSL1		transcription regulator	Activated	2.579	0.0134	0.0422	Ccl6,Ccl7,EGR1,FOS,HPGD,IL1B,JUN		#N/A	#N/A	#N/A	#N/A	#N/A	#N/A	#N/A	#N/A
36	ACKR2		G-protein coupled receptor	Activated	2.042	1.41e-07	3.89e-06	Ccl2,CCR2,IFI16,Ifi27l2a/Ifi27l2b,IFIT1B,IFIT3,Ifitm6,IL1B,ISG15,OAS2,Oasl2,USP18		ACKR2		G-protein coupled receptor	Activated	3.162	6.48e-07	1.28e-05	ADAR,CXCL10,IFI16,Ifi27l2a/Ifi27l2b,IFIT1B,IFIT3,IL1B,OAS1,OAS2,Oasl2		ACKR2		G-protein coupled receptor		-0.447	0.0173	0.0777	IFI16,Ifi27l2a/Ifi27l2b,IL1A,IL1B,TNF
37	UBAP1	-0.262	other	Activated	2	0.014	0.0463	IFIT3,ISG15,OAS2,USP18		UBAP1	0.378	other	Activated	2	0.00501	0.0195	IFIT3,OAS1,OAS2,PSMB8		#N/A	#N/A	#N/A	#N/A	#N/A	#N/A	#N/A	#N/A
	Upstream regulators inhibited by D but not reversed by APOC3 ASO
38	poly rI:rC-RNA		biologic drug	Inhibited	-2.026	6.84e-20	3.19e-17	ABCA1,ADAM10,APP,ATF3,AUTS2,AXL,B2M,Bst2,C3,CCL2,Ccl2,CCNT1,CCR1,CCT5,CD14,CD83,CFB,CHD7,CIITA,COX7A2L,CTSS,CXCL3,CXCR4,EGR1,FARS2,FCGR2B,FNDC3B,FOS,GDF15,GPHN,HLA-A,HLA-E,HSPA5,IFI16,IFI30,IFIT1B,IFIT3,IFITM3,IGF1,IL1B,IMMP2L,INO80,IRF2,IRF8,Irgm1,ISG15,JUN,JUNB,KLF6,LGALS9B,MAFB,MCL1,MERTK,MMP9,MYBBP1A,NFKBIE,NFKBIZ,NR4A1,NR4A3,OAS2,Oasl2,ODC1,PARP14,PFKFB3,PHF11,PIK3R3,PLSCR1,PMM2,PTPRJ,Retnla…		poly rI:rC-RNA		biologic drug	Inhibited	-5.163	2.1e-21	4.69e-19	ACSL3,ADAR,ANXA1,APP,ATF3,B2M,BAX,BIRC3,CCND2,CCR1,CD163,CD36,CD74,CD83,CD86,CD9,CDK14,CEBPB,CFH,CIITA,CMPK1,CTSS,CXCL10,CXCL3,CXCR4,DDIT4,EGR1,EXT1,FCGR1A,FCGR2B,FOS,HLA-A,HLA-DMA,HLA-DMB,HSPA5,IFI16,IFIT1B,IFIT3,IFITM3,IGF1,Igtp,IL1B,IRAK1,IRF9,JUN,KMO,LIPA,LPL,LY6E,LYN,LYZ,MAX,NFKB2,NFKBIZ,NLRP3,OAS1,OAS2,Oasl2,PARP14,PIM1,PSMB8,PTPN2,RELB,RPL11,RPL15,RPL19,RPL3,RPS13,RPS2,SAT1,SCARB2,SLFN13,S…		poly rI:rC-RNA		biologic drug	Inhibited	-3.604	4.29e-09	4.74e-07	ABCA1,AXL,CASP8,CCND3,CCR1,CD36,CD44,CD74,CD80,CDK14,CIITA,CYP4F2,DDIT4,EBI3,ELMOD2,EPSTI1,ETFB,ETNK1,FAU,FCGR1A,GATM,HLA-A,IFI16,IFNGR1,IGF1,IL1A,IL1B,IL2RG,IL4I1,IMMP2L,IRAK2,IRF8,KLF4,KLF6,LIPA,LPL,MAFB,MAX,NCOA7,NFKBIZ,NR4A1,NR4A2,P2RY6,PHLDA1,PTPN23,Retnla,RGS2,RPL30,SLC25A4,SLC40A1,SPIC,ST6GAL1,ST8SIA4,STON2,TAP1,TAP2,TCF7L2,TNF,TNFAIP2,ZFP36
39	IFNAR (family)		group	Inhibited	-2.716	3.58e-15	7.91e-13	AXL,B2M,Bst2,C3,CCL2,Ccl2,Ccl7,HLA-A,HLA-E,IFI16,IFIT1B,IFIT3,IFITM3,IL1B,IRF8,Irgm1,ISG15,MMP9,OAS2,RNF213,SPP1,TGFBR1,UNC93B1,USP18,VCAM1,ZBP1		IFNAR (family)		group	Inhibited	-4.194	4.93e-14	4.19e-12	APOBEC3B,B2M,Ccl7,CD74,CD86,CXCL10,DDIT3,HLA-A,IFI16,IFIT1B,IFIT3,IFITM3,IL1B,IRF9,KDM6B,LGALS3BP,NLRP3,OAS1,OAS2,PSMB8,TAP1,TLR7		IFNAR (family)		group	Inhibited	-2.401	8.13e-05	0.00189	AXL,CD74,HLA-A,IFI16,IFNGR1,IL1B,IRF8,ITGA4,TAP1,TAP2,TGFBR1,TNF
40	ELAVL1	-0.165	other	Inhibited	-2.088	1.19e-12	1.27e-10	ABCA1,ACAA2,ACADL,ACLY,ACSL4,ADGRE1,ATF3,AXL,B2M,BCL2L1,Bst2,Ccl2,Ccl8,CCN2,CCR2,CD63,CD83,CPT1A,CTSS,FOS,HLA-A,HLA-DRB5,IFI16,IFITM3,IL1B,Irgm1,LGALS9B,MAT2A,MPEG1,NCL,OAS2,PLA2G7,PRKN,RPS14,RPS6,RPTOR,SAT1,TP53INP1,USP18,VCAM1,VIM,ZFP36		ELAVL1	0.022	other	Inhibited	-2.367	1.99e-13	1.61e-11	ACTA2,ADGRE1,ATF3,B2M,BATF,BCL2L1,Cd52,CD63,CD68,CD83,CD86,CEBPA,CTSS,CXCL10,FABP4,FOS,HLA-A,HLA-DRB5,HMOX1,IFI16,IFITM3,IL1B,IRF9,LGALS3BP,LPL,MPEG1,OAS1,OAS2,PLA2G7,PNPLA2,PPARD,PSAP,RPL13,RPS6,SAT1,SYK,TSC22D3		ELAVL1	-0.127	other		0.684	7.93e-05	0.00187	ABCA1,ACSL4,ARHGDIA,AXL,CYBA,CYBB,CYP27A1,FCGR2A,HLA-A,HLA-DRB5,IFI16,IL1A,IL1B,IL2RG,IRF4,LPL,MPEG1,NDUFB8,PLA2G7,SRSF7,TNF,TSC22D3,WEE1,ZFP36
41	ZBTB10	-0.577	transcription regulator	Inhibited	-2.065	4.64e-12	4.33e-10	AGO3,B2M,BCL2L11,Bst2,CASP4,CCL24,CD83,CXCL3,HLA-E,IFI16,Ifi27l2a/Ifi27l2b,IFIT1B,IFIT3,IFITM3,Ifitm6,IL1B,IRF2,Irgm1,ISG15,LGALS9B,LRP1,NR4A3,RTP4,Tlr13,TSLP,UNC93B1,ZBP1,ZBTB20		ZBTB10	0.192	transcription regulator	Inhibited	-3.043	1.68e-06	2.83e-05	ANXA1,B2M,CASP4,CD83,CD86,CXCL10,CXCL3,IFI16,Ifi27l2a/Ifi27l2b,IFIT1B,IFIT3,IFITM3,Igtp,IL1B,LPL,OAS1,SLFN13		ZBTB10	0.336	transcription regulator		-1.715	0.0107	0.0568	BCL2L11,CD80,CYBB,ELMOD2,IFI16,Ifi27l2a/Ifi27l2b,IL10RB,IL1B,IRF4,LPL,TNF
42	RICTOR	0.396	other	Inhibited	-2.488	7.83e-10	4.03e-08	ATP6V1D,ATP6V1H,BCL2L1,BCL2L11,COX7A2L,EGR1,IFI16,IL1B,ISG15,MCL1,OAS2,PFKFB3,PHF11,PRKCB,PSMC1,PSMC5,PSMD11,PSMD4,PSME4,PXN,RPL12,RPL13A,RPL35A,RPL4,RPL41,RPL6,Rplp1 (includes others),RPS2,RPS23,RPS6,RPSA,SEM1,Uba52,VCAM1,VIM		RICTOR	-0.469	other	Inhibited	-2.522	4.07e-34	2.9e-31	ATP6V0B,ATP6V1F,ATP6V1G1,BAX,BCL2L1,BSG,COX17,COX4I1,COX5A,Cox6c,Cox7c,EGR1,IFI16,IL1B,NDUFA3,NDUFB10,NDUFB5,NDUFV2,OAS2,PRKCB,PRKCE,PSMB8,PSME1,RPL10,RPL11,RPL14,RPL18,RPL21,Rpl29 (includes others),Rpl34 (includes others),RPL38,RPL41,RPL6,RPL7,RPL8,RPL9,Rplp1 (includes others),RPLP2,RPS10,RPS11,RPS13,RPS15,RPS18,RPS19,RPS2,RPS21,RPS24,RPS27A,RPS29,RPS3,Rps3a1,RPS4Y1,RPS5,RPS6,RPS8,RPS9,SGK1,Uba5…		RICTOR	0.533	other		-0.697	1.5e-05	0.000498	ATP6V1A,BCL2L11,FAU,IFI16,IL1B,NDUFA5,NDUFB6,NDUFB8,PSMD12,PXN,RPL14,RPL18,RPL30,RPL35A,RPL38,RPL41,RPS18,RPS21,RPS26,RPS27A,RPS29,Rps3a1,TNF,Uba52
43	Pam3-Cys-Ser-Lys4		chemical reagent	Inhibited	-2.714	1.12e-09	5.6e-08	ADGRE5,BCL2A1,BCL2L1,BCL2L11,CASP4,CCL2,Ccl2,Ccl7,CCN2,CCR1,CCR2,CCR5,CD14,CD83,CXCL3,DDX5,FCGR2B,HLA-A,HLA-DRB5,IFI16,IL1B,JUN,MCL1,MMP9,NFKBIZ,PARP14,RGS1,SLC40A1,VCAM1,Wfdc17		Pam3-Cys-Ser-Lys4		chemical reagent	Inhibited	-3.416	4.58e-12	2.89e-10	BATF,BCL2L1,BIRC3,CASP4,Ccl7,CCR1,CD83,CD86,CXCL10,CXCL13,CXCL3,DDIT4,DDX5,FAM162A,FCGR2B,HIF3A,HLA-A,HLA-DRB5,IFI16,IL1B,JUN,KDM6B,NFKB2,NFKBIZ,NLRP3,PARP14,RELB,SPI1,TGFB2		Pam3-Cys-Ser-Lys4		chemical reagent		-1.963	9.93e-11	1.84e-08	BCL2A1,BCL2L11,CASP8,CCR1,CCR5,CD180,CD80,DDIT4,EBI3,FCGR2A,HIF3A,HIVEP3,HLA-A,HLA-DRB5,IFI16,IL1A,IL1B,IRAK2,IRF4,ITGA4,MAPK3,NFKBIZ,Pvr,RGS2,SLC3A2,SLC40A1,TNF,TRAF3,Wfdc17
44	IFNAR1	0.241	transmembrane receptor	Inhibited	-2.028	1.87e-09	8.61e-08	ATF3,AXL,B2M,CCL24,CIITA,CLEC4D,CXCL3,DUSP6,HLA-A,IFI16,IFIT1B,IFIT3,IFITM3,IL1B,ISG15,ITGAV,NUB1,OAS2,Oasl2,PARP14,PLA2G7,PLSCR1,RIPOR2,RTP4,SMAD7,TNFAIP2,USP18,VCAM1		IFNAR1	0.062	transmembrane receptor	Inhibited	-3.686	1.91e-09	7.4e-08	ADAR,ATF3,B2M,CD86,CIITA,CXCL10,CXCL13,CXCL3,HLA-A,IFI16,IFIT1B,IFIT3,IFITM3,IL1B,LGALS3BP,LY6E,OAS1,OAS2,Oasl2,PARP14,PLA2G7,PSME1,TLR7,TRIM25		IFNAR1	-0.375	transmembrane receptor		-0.614	0.0046	0.034	AXL,Ccl9,CIITA,DUSP6,EPSTI1,HLA-A,IFI16,IFNAR1,IFNGR1,IL1A,IL1B,PLA2G7,TNF,TNFAIP2
45	IRF3	0.136	transcription regulator	Inhibited	-3.463	4.98e-09	2.01e-07	ADAM9,B2M,Bst2,CCL2,Ccl2,FGF1,IFI16,Ifi27l2a/Ifi27l2b,IFIT1B,IFIT3,IFITM3,IL1B,Irgm1,ISG15,JUNB,MMP9,OAS2,Oasl2,PARP14,PHF11,RASA1,RPTOR,SORL1,TSLP,USP18,VCAM1,VIM,ZBP1		IRF3	-0.09	transcription regulator	Inhibited	-3.635	4.08e-07	8.68e-06	ADAR,APOBEC3B,B2M,BIRC3,CD86,CXCL10,FCGR1A,IFI16,Ifi27l2a/Ifi27l2b,IFIT1B,IFIT3,IFITM3,Igtp,IL1B,OAS1,OAS2,Oasl2,PARP14,RPS7,TAP1,Trim30a/Trim30d		#N/A	#N/A	#N/A	#N/A	#N/A	#N/A	#N/A	#N/A
46	N-ethyl-N-nitrosourea		chemical toxicant	Inhibited	-2.173	4.87e-08	1.53e-06	Bst2,CCL2,CCL24,HSP90AA1,IFIT1B,IFIT3,IFITM3,IL1B,ISG15,Mt1,OAS2,Oasl2,PF4,SPP1		N-ethyl-N-nitrosourea		chemical toxicant	Inhibited	-2.164	1.1e-07	2.78e-06	BAX,CXCL13,HSP90AA1,IFIT1B,IFIT3,IFITM3,IL1B,OAS1,OAS2,Oasl2,PF4,PSMB8		#N/A	#N/A	#N/A	#N/A	#N/A	#N/A	#N/A	#N/A
47	IRF7	-1.331	transcription regulator	Inhibited	-2.499	1.16e-07	3.27e-06	BCL2L1,CASP4,Ccl2,DNAJA1,IFI16,IFIT1B,IFIT3,IFITM3,IRF8,Irgm1,ISG15,MCL1,OAS2,Oasl2,PARP14,PHF11,PLSCR1,RPTOR,RTP4,TLR8,TNFAIP8,USP18,ZBP1		IRF7	-1.183	transcription regulator	Inhibited	-3.996	6.89e-08	1.81e-06	ADAR,BCL2L1,CASP4,CXCL10,FCGR1A,IFI16,IFIT1B,IFIT3,IFITM3,Igtp,IRF9,LILRA5,OAS1,OAS2,Oasl2,PARP14,PSMB8,PSME1,TAP1,Trim30a/Trim30d		IRF7	-0.245	transcription regulator	Inhibited	-2.76	0.00839	0.0488	CALHM6,CCRL2,CD80,FCGR1A,IFI16,IL1A,IL4I1,IRF8,MICB,TAP1,TAP2,TNFAIP8
48	Wy 40905		chemical reagent	Inhibited	-2.582	2.87e-07	7.08e-06	ATF3,EGR1,FANCC,FOS,FOSB,GLA,HADH,JUN,JUNB,KLF6,NFKBIZ,NR4A1,SCN1B,ZFP36		Wy 40905		chemical reagent	Inhibited	-2.438	0.000141	0.00117	ATF3,BTG2,CD68,EGR1,FOS,JUN,MAZ,MNAT1,NFKBIZ		Wy 40905		chemical reagent		0.108	0.000366	0.00608	EGR2,KLF4,KLF6,NFKBIZ,NR4A1,RGS2,SCN1B,UHMK1,ZFP36
49	IFIH1	-0.622	enzyme	Inhibited	-2.284	3.55e-07	8.43e-06	Bst2,CCL2,Ccl2,CXCL3,EGR1,IFIT1B,IFIT3,IL1B,ISG15,OAS2,PTPRJ,USP18		IFIH1	-0.387	enzyme	Inhibited	-2.952	1.39e-06	2.42e-05	CXCL10,CXCL3,EGR1,IFIT1B,IFIT3,IL1B,OAS1,OAS2,SIGLEC1,TANK		#N/A	#N/A	#N/A	#N/A	#N/A	#N/A	#N/A	#N/A
50	mir-802		microRNA	Inhibited	-2.236	4.86e-07	1.09e-05	APP,ARHGAP24,ARHGEF10,ARPC5,ARRDC3,CD14,CDK19,CXCR4,DTX4,FGF1,HPGD,ITGAV,MBNL1,MYLK,PIK3CG,PIK3R3,RASA1,SPP1,TCF4,VIM		mir-802		microRNA	Inhibited	-3.286	0.00244	0.0113	ACTA2,APP,CXCR4,HPGD,MGST1,MYH11,MYL9,NOX4,RHOA,RHOJ,SDCBP		mir-802		microRNA		1.265	0.0168	0.0768	ARPC3,ARPC5,CFL2,DTX4,EPB41L1,GSN,HPGD,NDUFB6,RHOC,ZNF704
51	IFN BETA (family)		group	Inhibited	-2.898	7.89e-07	1.64e-05	ADNP,ATF3,BCL2L1,Bst2,CASP4,CCL2,Ccl2,CCL24,Ccl8,CD83,FKBP5,HLA-A,IFI16,IFIT1B,IFIT3,IFITM3,IL1B,IRF2,ISG15,KLHL14,MMP9,OAS2,Oasl2,SPP1,TGFBR1,TSLP,USP18,ZBP1		IFN BETA (family)		group	Inhibited	-3.038	3.16e-12	2.08e-10	ADAR,APOBEC3B,ATF3,BCL2L1,BTG2,CASP4,CD163,CD74,CD83,CD86,CDK2AP1,CEBPB,CXCL10,FKBP5,GAS6,HLA-A,HNRNPK,IFI16,IFIT1B,IFIT3,IFITM3,IL1B,IRF9,KMO,OAS1,OAS2,Oasl2,TAP1,TLR7,TNRC6B,TRIM25,Trim30a/Trim30d		IFN BETA (family)		group		-0.05	0.0102	0.0552	CD74,CD80,CYBB,FKBP5,HLA-A,IFI16,IFNGR1,IL1A,IL1B,Mt2,MTAP,RALGPS2,RTN4,TAP1,TGFBR1,TNF
52	calcimycin		chemical reagent	Inhibited	-2.023	1.58e-06	2.97e-05	APP,ATF3,BCL2L11,CD14,CD83,EGR1,FOS,FOSB,HSP90B1,HSPA5,IGF1,IL1B,JUN,JUNB,NR4A1,ODC1,TSLP		calcimycin		chemical reagent	Inhibited	-3.057	4.47e-06	6.47e-05	APP,ATF3,CALR,CD83,CD86,DDIT3,DDIT4,EGR1,FOS,HSP90B1,HSPA5,IGF1,IL1B,JUN		calcimycin		chemical reagent		-1.16	0.0315	0.101	BCL2L11,CD80,DDIT4,IGF1,IL1B,IRF4,NR4A1,TNF
53	26S PROTEASOME (complex)		complex	Inhibited	-2.026	1.19e-05	0.000169	ARNT,ATG7,ATP6V1D,ATP6V1H,BAG3,BCL2L11,CCL2,CDKN1B,CXCL3,HMGB2,JUNB,MCOLN1,Retnla,RUNX3,TXNIP,VIM,VPS11,VPS8		26S PROTEASOME (complex)		complex	Inhibited	-2.561	0.00877	0.0301	BAX,BIRC3,CD68,CXCL3,DDIT3,HMGB2,LAMP1,MAP1LC3B,NFKB2,PSAP		#N/A	#N/A	#N/A	#N/A	#N/A	#N/A	#N/A	#N/A
54	IRF9	-0.558	transcription regulator	Inhibited	-2.537	5.32e-05	0.000573	CIITA,GMPPB,IFIT3,IFITM3,IRF8,ISG15,OAS2,Oasl2,PARP14,RTP4,USP18,ZBP1		IRF9	-0.64	transcription regulator	Inhibited	-2.535	1.69e-05	0.000201	ADAR,CIITA,CXCL10,IFIT3,IFITM3,LGALS3BP,OAS2,Oasl2,PARP14,SLFN13,TRIM25		#N/A	#N/A	#N/A	#N/A	#N/A	#N/A	#N/A	#N/A
55	pyridostatin		chemical reagent	Inhibited	-2.333	0.000889	0.00571	B2M,IFIT1B,IFIT3,IFITM3,ISG15,PARP14,PLSCR1,RTP4,USP18		pyridostatin		chemical reagent	Inhibited	-3.713	4.08e-09	1.48e-07	ADAR,B2M,CXCL10,IFIT1B,IFIT3,IFITM3,IRF9,LGALS3BP,LY6E,PARP14,PSMB8,PSME1,TAP1,TRIM25		#N/A	#N/A	#N/A	#N/A	#N/A	#N/A	#N/A	#N/A
56	IFNL1		cytokine	Inhibited	-2.234	0.00152	0.00854	ATF3,CD83,IFIT3,IFITM3,ISG15,OAS2,PHF11,PLSCR1,RTP4,USP18		IFNL1		cytokine	Inhibited	-2.964	0.000151	0.00124	ATF3,CD83,CXCL10,IFIT3,IFITM3,IRF9,LGALS3BP,OAS1,OAS2,SLC15A3		#N/A	#N/A	#N/A	#N/A	#N/A	#N/A	#N/A	#N/A
57	RNY3		other	Inhibited	-2.236	0.00267	0.0133	IFIT3,IFITM3,ISG15,OAS2,RTP4		RNY3		other	Inhibited	-2.646	5.85e-06	8.19e-05	CXCL10,IFIT3,IFITM3,LY6E,OAS1,OAS2,SIGLEC1		#N/A	#N/A	#N/A	#N/A	#N/A	#N/A	#N/A	#N/A
58	IFN TYPE 1 (family)		group	Inhibited	-2.019	0.00303	0.0148	BCL2L1,Bst2,Ccl2,IFI16,IFIT1B,ISG15,MMP9		IFN TYPE 1 (family)		group	Inhibited	-2.18	0.0143	0.0433	BCL2L1,CXCL10,CXCL13,IFI16,IFIT1B		#N/A	#N/A	#N/A	#N/A	#N/A	#N/A	#N/A	#N/A
59	ouabain		chemical drug	Inhibited	-2.414	0.00566	0.0234	ACTB,BCL2L1,FOS,HSPA5,HSPA8,VIM		ouabain		chemical drug	Inhibited	-2.2	0.00726	0.0258	BCL2L1,DDIT3,FOS,HSPA5,HSPA8		#N/A	#N/A	#N/A	#N/A	#N/A	#N/A	#N/A	#N/A
60	VPC-220010		chemical reagent	Inhibited	-2.449	0.0086	0.0317	CDK6,DNAJB9,FKBP5,HPGD,LIFR,SELENOP		VPC-220010		chemical reagent	Inhibited	-2.333	5.95e-06	8.24e-05	ACSL3,AKT1,FKBP5,GPD1L,HPGD,LIFR,MAF,SELENOP,SGK1		VPC-220010		chemical reagent		1.134	0.000726	0.00972	ANKH,CDK6,FKBP5,HPGD,LIFR,SELENOP,TSC22D1
61	PAF1	0.527	other	Inhibited	-2.449	0.00948	0.0345	IFIT3,IFITM3,ISG15,NFKBIZ,OAS2,ZFP36		PAF1	0.163	other	Inhibited	-2.236	0.0113	0.0365	BIRC3,IFIT3,IFITM3,NFKBIZ,OAS2		#N/A	#N/A	#N/A	#N/A	#N/A	#N/A	#N/A	#N/A

## Sheet: EC_IPA
	NDvsD_LCMV							NDvsD_STZ								cASOvsAPOC3_LCMV
Number of signficant pathways	Ingenuity Canonical Pathways	-log(p-value)	Ratio	z-score	Molecules			Ingenuity Canonical Pathways	-log(p-value)	Ratio	z-score	Molecules				Ingenuity Canonical Pathways	-log(p-value)	Ratio	z-score	Molecules
	Pathways increased by D and reversed by APOC3 ASO
1	Deubiquitination	4.22	0.125	5.048	ACTB,ACTR8,ARRB1,ATXN3,ATXN7,BIRC3,ESR1,FOXK1,FOXO4,GATA3,HCFC1,KAT2B,MAT2B,NOD1,OTUD7B,PSMB7,PSMC4,PSMD14,PSME4,RPS27A,SMAD4,SMAD7,SMURF2,STAM,STAM2,TGFB1,TGFBR1,TRRAP,USP22,USP3,USP47,USP7,VCP			Deubiquitination	0.671	0.019	2.236	PSMB1,PSMB4,PSMB6,USP12,ZRANB1				Deubiquitination	4.48	0.0875	-3.962	ABRAXAS2,ADRM1,ASXL2,ATXN3,BABAM2,FOXK1,INO80D,PTEN,RAD23A,SEM1,SMAD4,SMAD7,SMURF2,SNX3,STAM,TRIM25,UBE2D1,USP12,USP15,USP22,USP7,WDR20,YY1		2
2	Ion channel transport	2.11	0.109	3.441	ANO6,ASPH,ATP11A,ATP11B,ATP11C,ATP1A1,ATP1B3,ATP2A3,ATP6V0A1,ATP6V1B2,ATP8B1,ATP9B,CAMK2D,FXYD1,FXYD6,NEDD4L,OSTM1,RPS27A,TTYH3,WWP1			Ion channel transport	0.743	0.0219	2	ATP6V1F,SGK1,TSC22D3,WWP1				Ion channel transport	0	0.0273	-2.236	ATP11C,ATP6V1A,ATP9B,SRI,TRPM3		4
3	Role of PKR in Interferon Induction and Antiviral Response	2.08	0.118	3.742	CASP3,HSP90B1,Hspa1b,HSPA8,IKBKB,MAP2K3,MAP2K4,MAP2K7,MAPK1,MAPK3,MAPK8,NFKB1,PDGFD,REL,SCARA3,STAT3			Role of PKR in Interferon Induction and Antiviral Response	2.2	0.0441	2.449	FAS,HSP90AB1,HSP90B1,HSPA5,HSPA8,PDGFD				Role of PKR in Interferon Induction and Antiviral Response	1.38	0.0662	-2.121	ATF2,CASP8,EIF2AK2,HSP90AB1,IKBKB,MAPK1,MAPK3,SCARA3,TAB2		5
	Phagosome Formation	0.815	0.0704	5.774	ADGRA3,ADGRG1,ADGRL1,AKT3,ARPC5,DOCK1,F2R,FZD4,FZD6,GAB2,GABBR1,GPR107,GPR180,GPRC5A,HMOX1,ITGB1,ITPR1,ITPR2,LPAR1,MAP2K3,MAP2K4,MAP2K5,MAP2K7,MAPK1,MAPK3,MTOR,MYL6,MYL9,PIK3CB,PIK3R3,PIKFYVE,PLA2G4A,PNPLA2,PNPLA8,PRKCH,PRKCI,PRKCQ,PRKD3,PTGER4,PTK2B,RALB,RAPGEF1,RAPGEF3,RAPGEF4,SAP130,SCARA3,SOS1,SOS2,WIPF1			Phagosome Formation	0	0.0115	2.121	ACKR3,ARPC3,ARPC5L,CHRM3,F2R,KRAS,LPAR6,MYL12B				Phagosome Formation	0	0.0316	-4.69	AKT3,CHRM3,CMKLR1,GPR107,ITPR1,KRAS,MAPK1,MAPK3,MAPK7,MRAS,PLA2G4A,PRDX6,PRKCE,PRKCH,RAPGEF4,ROCK1,SAP130,SCARA3,SOS1,VAV3,WASF2,WIPF1		1
	FAK Signaling	0	0.0522	6.26	ACVR1B,ADGRA3,ADGRG1,ADGRL1,AKT3,ARHGAP35,ARPC5,BMPR2,CAPN5,CDH5,CTNNB1,DOCK1,EFNA5,ELF1,ETS1,F2R,FZD4,FZD6,GABBR1,GHR,GIT1,GIT2,GPR107,GPR180,GPRC5A,IL13RA1,IL1R1,IL20RB,IL31RA,IL4R,ITGB1,LPAR1,MAP2K4,MAP2K5,MAPK1,MAPK3,MAPK8,MMP14,MMP2,MTOR,NFKB1,PIK3CB,PIK3R3,PTGER4,RALB,RB1CC1,SOCS2,SOS1,SOS2,TCF7L1,TCF7L2,TGFB1,TGFBR1,WIPF1			FAK Signaling	0	0.00967	2.53	ACKR3,ARPC3,ARPC5L,CDH5,CHRM3,ELF1,F2R,KRAS,LPAR6,SDCBP				FAK Signaling	0	0.0193	-3.578	AKT3,ARHGAP35,CAPN5,CHRM3,CMKLR1,ELF1,ETS1,GIT2,GPR107,IL31RA,KDR,KRAS,MAPK1,MAPK3,MAPK7,MRAS,PTEN,PXN,SOS1,WIPF1		3
	Pathways increased by D but not reversed by APOC3 ASO
4	Transcriptional regulation by RUNX1	4.35	0.151	3.71	ARID1A,ARID2,AUTS2,CBFB,CBX4,CBX6,CREBBP,ELF1,ESR1,GATA3,KMT2A,LMO2,MNAT1,PHC1,PSMB7,PSMC4,PSMD14,PSME4,RPS27A,SMARCA4,SMARCD1,TAL1,TCF12			Transcriptional regulation by RUNX1	1.98	0.0395	2.449	CTSV,ELF1,LMO2,PSMB1,PSMB4,PSMB6				Transcriptional regulation by RUNX1	0.593	0.0461	-1.89	ARID2,CBX4,CREBBP,ELF1,KMT2A,SEM1,SMARCA4		6
5	Regulation of RUNX2 expression and activity	2.37	0.151	2.714	CBFB,DLX6,ESR1,FBXW7,PSMB7,PSMC4,PSMD14,PSME4,RPS27A,TWIST1,WWP1			Regulation of RUNX2 expression and activity	1.93	0.0548	2	PSMB1,PSMB4,PSMB6,WWP1				Regulation of RUNX2 expression and activity	0.633	0.0548	0	FBXW7,NR3C1,SEM1,TWIST1		10
6	Signaling by NOTCH4	1.95	0.133	2.714	CREBBP,FBXW7,HEY2,KAT2B,MAML3,NCSTN,NOTCH4,PSMB7,PSMC4,PSMD14,RPS27A			Signaling by NOTCH4	1.74	0.0482	2	ACTA2,PSMB1,PSMB4,PSMB6				Signaling by NOTCH4	0.272	0.0361	NaN	CREBBP,FBXW7,SEM1		11
7	Signaling by ROBO receptors	1.31	0.103	2.887	ABL2,CAP1,ISL1,NRP1,PRKACA,PSMB7,PSMC4,PSMD14,PSME4,RPS27A,SOS1,SOS2			Signaling by ROBO receptors	1.28	0.0345	2	PFN1,PSMB1,PSMB4,PSMB6				Signaling by ROBO receptors	0.256	0.0345	-1	CUL2,DAG1,SEM1,SOS1		8
	Degradation of beta-catenin by the destruction complex	1.29	0.109	2.121	CSNK1A1,CTNNB1,PSMB7,PSMC4,PSMD14,PSME4,RPS27A,TCF7L1,TCF7L2,TLE3			Degradation of beta-catenin by the destruction complex	1.6	0.0435	2	PSMB1,PSMB4,PSMB6,ZRANB1				Degradation of beta-catenin by the destruction complex	0	0.0326	NaN	CTBP2,SEM1,TLE3		12
	Metabolism of polyamines	0.316	0.0678	2	PSMB7,PSMC4,PSMD14,PSME4			Metabolism of polyamines	3.14	0.0847	2.236	OAZ1,PSMB1,PSMB4,PSMB6,SAT1				Metabolism of polyamines	0.859	0.0678	0	AMD1,OAZ1,OAZ2,SEM1		9
	BBSome Signaling Pathway	0	0.047	2.837	ADGRA3,ADGRG1,ADGRL1,BBS9,ERN1,EZH2,F2R,FZD4,FZD6,GABBR1,GPR107,GPR180,GPRC5A,INVS,LPAR1,MAP2K4,MAPK1,PCGF2,PRKACA,PTCH1,PTGER4,RAB5A,STAT3			BBSome Signaling Pathway	0	0.00818	2	ACKR3,CHRM3,F2R,LPAR6				BBSome Signaling Pathway	0	0.0184	-1.89	ASXL2,CCDC66,CCT4,CCT6A,CHRM3,CMKLR1,GPR107,MAPK1,PHF1		7

## Sheet: EC_upstream_reg
	EC_NDvsD (LCMV)									EC_NDvsD (STZ)									EC_cASOvsAPOC3 (LCMV)
	Upstream Regulator	Expr Log Ratio	Molecule Type	Predicted Activation State	Activation z-score	p-value of overlap	B-H corrected p-value	Target Molecules in Dataset		Upstream Regulator	Expr Log Ratio	Molecule Type	Predicted Activation State	Activation z-score	p-value of overlap	B-H corrected p-value	Target Molecules in Dataset		Upstream Regulator	Expr Log Ratio	Molecule Type	Predicted Activation State	Activation z-score	p-value of overlap	B-H corrected p-value	Target Molecules in Dataset
Number of signficant pathways	Upstream regulators activated by D and reversed by APOC3 ASO
1	lipopolysaccharide		chemical drug	Activated	7.422	8.1e-21	2.01e-17	9930111J21Rik1/Gm12185,ABCA3,ABCC1,ACADL,ACE,ACOT2,ACTB,AKAP13,ANGPTL4,API5,ARL15,ASH1L,ATP1A1,B2M,BBX,BIRC3,BMP4,CARHSP1,CASP3,CAV1,CCND3,CCNG2,CCNL1,CD200,CD2AP,CD38,CD74,CD9,CDC42EP4,CDH5,CDKN1B,CEACAM1,CFH,CFLAR,CHCHD2,CKAP4,Clca3a1/Clca3a2,CLIC4,CLPTM1L,CNNM2,COL5A2,CPT1A,CREB3L2,CREB5,CREBBP,CRLF3,CST3,CTNNB1,CTSC,CUL5,CXCL16,CYP1B1,DAXX,DDIT4,DDX17,DDX27,DDX5,DENND3,DIDO1,DRAM1,DSE,DUSP16,…		lipopolysaccharide		chemical drug	Activated	2.711	1.72e-13	4.23e-11	ABCA1,ACAA2,ACKR3,ACTA2,ADAMTS1,BRI3,CALR,CASP4,CBFA2T3,CCN2,CCND2,CD200,CD38,CD9,CDH5,CDKN1A,CFH,CHCHD2,CSRP1,CTSV,CYP1B1,ELF1,EPAS1,EPHX2,F2R,FAS,Foxp1,GSN,GSTP1,H3-3A/H3-3B,HSP90B1,HSPA5,HSPA8,ID3,IFITM2,JUND,KCNN4,KLF10,KLF2,KLF4,LGALS1,Ly6a (includes others),MANF,MAP1LC3B,NDFIP1,NDUFC1,NNMT,NOS3,NUPR1,PDIA3,PECAM1,PHLDB2,PKIG,PLAT,PLAUR,Podxl,PPIA,PSMB1,PSMB4,RHOB,RPLP0,RPS14,RPS2,S100A4,SAT…		lipopolysaccharide		chemical drug	Inhibited	-4.159	5.52e-07	0.000143	9930111J21Rik1/Gm12185,ABCC4,ACADL,ACLY,ADRM1,AHNAK,ANKMY2,ANXA3,AOX1,ATF2,BACH2,BAG4,BBX,Calm1 (includes others),CARHSP1,CASP8,CCN2,CCND2,CCT4,CCT6A,CD74,CDK6,CEACAM1,CLIC5,CLPTM1L,COX4I1,CPT1A,CREBBP,CRYAB,CTBP2,CUL2,DAG1,DDX17,DIDO1,DLL1,Eif1,EIF2AK2,ELF1,ELK4,EMB,ERF,FH,Fnbp1l,FNTA,Foxp1,FUT8,GBP2,GBP4,GBP6,GNAI3,GPM6A,GSTP1,HDGFL3,HEG1,HK1,HLA-A,HLA-DMA,HLA-DMB,HLA-DQA1,HLA-DQB1,HLA-DRB5,HSP…
	Upstream regulators inhibited by D and reversed by APOC3 ASO
2	miR-124-3p (and other miRNAs w/seed AAGGCAC)		mature microRNA	Inhibited	-5.529	3.75e-07	2.97e-05	ACTR8,ANKRD27,APEX2,B4GALT1,BTG3,CAV1,CDC14B,CDCA7L,CREB3L2,CTDSP2,CYP1B1,DRAM1,ERN1,FSTL1,GMCL1,IQGAP1,ITGB1,ITPRID2,KANK1,KLHL24,LIMCH1,LITAF,LRRC58,MAN2A1,NFATC1,NFIC,PAPSS2,RHOG,SEC11A,SLC30A7,SQSTM1,STAT3,TEAD1,TMEM263,TRIP11		miR-124-3p (and other miRNAs w/seed AAGGCAC)		mature microRNA	Inhibited	-2.823	0.00712	0.0387	ACAA2,CCN2,CYP1B1,GSN,ITPRID2,MAN2A1,TJP2,XIST		miR-124-3p (and other miRNAs w/seed AAGGCAC)		mature microRNA	Activated	3.625	0.00207	0.0681	ALDH9A1,ANKRD27,CCN2,CDC14B,CDK6,CERS2,CTDSP2,DNAJC1,GNAI3,KLHL24,LIMCH1,NFIC,NR3C2,RBMS1,TJP2,UHMK1,VPS37C
3	TREX1		enzyme	Inhibited	-3.471	0.000509	0.00974	B2M,Bst2,CFH,IFI16,Ifi27l2a/Ifi27l2b,IRF2,LGMN,Ly6a (includes others),MVP,NCOA7,NLRC5,PARP14,PLA2G4A,PRKCH,PROCR,SAMHD1,SIRT2,TRIM14,TXNIP,VCAM1		TREX1		enzyme	Inhibited	-2.39	0.000434	0.00552	CDKN1A,CFH,GSN,LGALS9B,LGMN,Ly6a (includes others),S100A6,TXNIP		TREX1		enzyme	Activated	3	0.000449	0.0256	CASP8,CAST,EIF2AK2,GBP4,IFITM3,IRF2,LGALS9B,NCOA7,PLA2G4A,PRKCH,SIRT2,TRIM14,TRIM25,TXNIP
	Upstream regulators activated by D but not reversed by APOC3 ASO
4	YAP1	0.253	transcription regulator	Activated	2.262	3.41e-11	9.42e-09	ACADSB,ANKZF1,ARID4B,C19orf53,CASP3,CCDC80,CDKN1B,CEP83,COPG1,CPT1A,CTNNB1,CTSD,DDAH1,ECHDC1,EI24,ESR1,FLNB,HFE,HMGCS1,ICAM1,ITGB1,ITPR1,LATS2,LIMCH1,LOX,MAML3,MMP14,MMP2,MYL9,NCSTN,NF2,PECAM1,PHACTR2,PMEPA1,RPL10,RPL10A,RPL13,RPL15,RPL18,RPL18A,RPL19,RPL21,RPL27A,RPL35A,Rpl36,RPL37,RPL37A,RPL38,RPL39,RPL41,RPL9,RPS12,RPS13,RPS18,RPS2,RPS24,RPS25,RPS27A,Rps3a1,RPS5,SAV1,SMAD7,SORBS1,SPOP,ST6GAL1,…		YAP1	-0.057	transcription regulator	Activated	2.439	7.93e-34	6.51e-31	ACTA2,ADAMTS1,BIN1,BRI3,CASP4,CCN2,CDKN1A,FAS,MAP1LC3B,NUPR1,PECAM1,RPL11,RPL15,RPL18,RPL19,RPL22,Rpl22l1,Rpl23a,RPL28,Rpl29 (includes others),RPL30,RPL31,RPL35,Rpl36,Rpl36a,RPL37,RPL37A,RPL38,RPL39,RPL41,RPL6,RPL7A,RPL8,RPL9,RPLP0,Rplp1 (includes others),RPLP2,RPS12,RPS14,RPS15,RPS18,RPS2,RPS21,Rps27/Rps27rt,RPS28,RPS29,RPS3,RPS7,RPS8,SGK1,ST6GAL1,TAGLN,THBS1,TJP2		YAP1	-0.064	transcription regulator		-1.522	1.24e-07	4.8e-05	ACACA,ACLY,ANKZF1,CASP8,CCN2,CDK6,CPT1A,EI24,INF2,ITPR1,KITLG,LIMCH1,PTEN,RAD50,RPL18A,Rpl23a,RPL27A,RPL35A,Rpl36,RPL37,RPL37A,RPL38,RPL39,RPL41,RPS15,RPS15A,RPS16,RPS18,RPS19,RPS2,RPS25,RPS26,Rps27/Rps27rt,RPS28,RPS29,SMAD7,SORBS1,SPOP,TJP2,UGP2,XIAP,ZEB1,ZNF521
5	F2R	0.397	G-protein coupled receptor	Activated	2.617	3.65e-07	2.93e-05	AKT3,CASP3,ECE1,ESR1,F2R,GJA1,HMOX1,ICAM1,IGFBP7,MCAM,MMP2,NR4A1,PLAT,S100A4,SELE,SELP,TEK,THBS1,VCAM1,VEGFA,VWF		F2R	0.431	G-protein coupled receptor	Activated	2.97	3.37e-06	0.000141	CASP4,CCN2,ECE1,F2R,PLAT,PLAUR,S100A4,TAGLN,THBS1		#N/A	#N/A	#N/A	#N/A	#N/A	#N/A	#N/A	#N/A
6	D-glucose		chemical - endogenous mammalian	Activated	3.037	4.29e-07	3.3e-05	ACADL,ACE,ACTB,ACTN1,ADARB1,ATP2A3,ATP8B1,BMP4,CAP1,CAPZA1,CASP3,CAV1,CCND3,CDKN1B,CFLAR,CTNNB1,CTSC,CTSD,DAD1,DDIT4,DECR1,DYNLL1,DYRK1A,EVA1A,FAIM,GATA4,GJA1,GLUL,GRK2,HK1,HMOX1,Hspa1b,HSPB1,ICAM1,Ifi27l2a/Ifi27l2b,ITGB1,ITPR1,ITPR2,KAT2B,KCNQ1OT1,KLF10,MCAM,MMP14,MMP2,MTOR,MYL9,NFKB1,NR4A1,NR4A2,NTS,NUAK1,NUP98,PDCD4,PFKFB3,PICK1,PINK1,PLK3,RTN3,S100A4,Scd2,SELE,SELP,SIRT2,SORBS1,SOS2,SQSTM1,ST…		D-glucose		chemical - endogenous mammalian	Activated	2.147	6.18e-08	5.16e-06	ABCA1,ACAA2,ACTA2,CALR,CAPZA2,CCN2,CCND2,CDKN1A,CTSV,FAS,GSN,HNRNPK,HSPA5,KCNN4,KLF10,LGALS1,NOS3,NUAK1,PDIA3,PLAUR,RPS14,S100A4,SGK1,SLC35B1,TAGLN,THBS1,TSPAN2,TXNIP,WWP1		#N/A	#N/A	#N/A	#N/A	#N/A	#N/A	#N/A	#N/A
7	medroxyprogesterone acetate		chemical drug	Activated	4.426	7.09e-07	5.08e-05	AKT3,ATOH8,B4GALT1,BIRC3,BMP4,BMPR2,CASP3,CAV1,CCNG2,CDKN1B,COL5A2,DOCK1,EOGT,ESR1,ETS1,F2R,FLNB,FUT8,FZD4,GHR,GLUL,GUSB,HGSNAT,HPSE,HSP90B1,ICAM1,IGFBP7,IL4R,ITGB1,JAK2,KRT18,LGMN,LIPA,MAPK8,NOTCH4,NPR1,PDE1A,PDGFD,PRICKLE2,PTCH1,RAPGEF1,SAMHD1,SFRP1,SMAD7,SMURF2,SSH1,ST6GAL1,STAT3,TCF7L1,TGFB1,THBS1,TIMP3,TWIST1,VCAN,VEGFA,ZBTB16		medroxyprogesterone acetate		chemical drug	Activated	2.708	5.01e-06	0.000193	ADAMTS1,ASAH1,CAV2,CCN2,CCND2,CDKN1A,F2R,FAS,GSN,HSP90B1,ID3,LGMN,MYL12B,NOS3,PDGFD,SAT1,SGK1,ST6GAL1,THBS1		#N/A	#N/A	#N/A	#N/A	#N/A	#N/A	#N/A	#N/A
8	AR		ligand-dependent nuclear receptor	Activated	4.115	1.86e-05	0.000738	ADGRA3,ARHGAP21,BMP4,BMPR2,BOP1,BPGM,C4A/C4B,CAMKK2,CAV1,CDCA7L,CDK14,CDKN1B,CFLAR,CKAP4,CMIP,COX8A,CTNNB1,DAB2IP,DDIT4,DHH,Dst,DYRK1A,EHD3,EPAS1,ERN1,ESR1,FBXL14,FZD6,GATA3,GJA1,GUSB,HLA-A,ICAM1,IGFBP5,IL1R1,ITPR2,Ly6a (includes others),MECOM,MMP2,MYL6,NCOA4,NFATC1,Pcp4l1,PDIA5,PER1,PHACTR4,PLAT,PMEPA1,PPP3CA,PTCH1,RP2,SCAP,SERPINA3,SLC41A2,SLCO3A1,SULF2,TBC1D8,TGFB1,THBS1,TIMP3,TMEM176B,Tpm1,TU…		AR		ligand-dependent nuclear receptor	Activated	2.206	0.000882	0.00927	ABCA1,CAV2,CCDC85B,CCN2,CDKN1A,DEGS1,EPAS1,GSN,GSTP1,HSPA5,Ly6a (includes others),NDUFB8,NOS3,NUPR1,PER1,PLAT,RHOB,SGK1,TCAP,THBS1		#N/A	#N/A	#N/A	#N/A	#N/A	#N/A	#N/A	#N/A
9	INTERFERON ALPHA (family)		group	Activated	4.063	2.88e-05	0.00106	ASCC2,AUTS2,B2M,BMP4,Bst2,CASP3,CAV1,CCND3,CD38,CDKN1B,CEACAM1,CKAP4,CSNK1E,CYP1B1,DAXX,DDIT4,EZH2,F2R,FAM13B,FILIP1L,GATA3,GBP6,GPR180,HLA-A,HMOX1,ICAM1,IFI16,Ifi47,IL1R1,IL4R,ITGB1,ITPR1,LARGE1,MAP4K4,MARCKSL1,MERTK,MMP2,MYLIP,MYOF,NF2,NFKB1,PARP14,PLAT,PPM1K,PRKACA,RB1,SOCS2,ST6GAL1,STAT3,TGFB1,TMEM140,Tpm4,TRAM2,TRIB2,TSC22D1,TTC28,USP6NL,VCAM1,VCAN		INTERFERON ALPHA (family)		group	Activated	2.178	0.00408	0.027	ADAMTS1,CCND2,CD38,CDKN1A,CYP1B1,F2R,FAS,IFITM2,MRPL17,PLAT,PLAUR,S100A6,SAT1,SGK1,ST6GAL1		#N/A	#N/A	#N/A	#N/A	#N/A	#N/A	#N/A	#N/A
10	PKC (family)		group	Activated	3.903	0.00018	0.00455	CCND3,CDKN1B,CPT1A,CTNNB1,ERN1,HMOX1,HSP90B1,IRF6,ITGB1,LIPA,MAD1L1,MAPK1,MAPK3,MMP2,NFKB1,NOTCH4,NR1D1,NR4A1,NR4A2,P4HB,PER1,RARA,RB1,RBL2,TGFB1,VCAM1,VEGFA		PKC (family)		group	Activated	2.067	5.84e-05	0.00132	ABCA1,ACTA2,CCN2,CDKN1A,DBP,FAS,HSP90B1,HSPA5,NR1D1,PER1,TAGLN		#N/A	#N/A	#N/A	#N/A	#N/A	#N/A	#N/A	#N/A
11	RRAS2	0.041	enzyme	Activated	3.441	0.000332	0.00714	ADAMTS12,CAV1,CD74,CFH,DRAM1,ELF1,GCNT2,HLA-DMA,IL4R,MDK,NCAM1,NRP1,PARVA,PROCR,SELE,THY1,TRIM14,VCAN,VWC2		RRAS2	-0.031	enzyme	Activated	2.236	0.0221	0.071	CASP4,CFH,ELF1,IFITM2,VWC2		#N/A	#N/A	#N/A	#N/A	#N/A	#N/A	#N/A	#N/A
12	thioacetamide		chemical toxicant	Activated	2.398	0.000525	0.00998	ACOT2,BIRC3,C4A/C4B,CD200,CTSF,CXCL16,EHD3,F2R,FBLN5,FSTL1,FXYD6,HK1,LOX,MMP14,MMP2,PDGFD,PECAM1,PLCB4,PRELP,PTK2B,RBM3,Scd2,SELENOW,SMAD7,STEAP3,TGFB1,TGFBR1,TMEM45A,Tpm1		thioacetamide		chemical toxicant	Activated	2.433	5.81e-05	0.00132	ACTA2,ADAMTS1,CCN2,CD200,CSRP2,F2R,IFITM2,LGALS1,PDGFD,PECAM1,RBM3,TAGLN		#N/A	#N/A	#N/A	#N/A	#N/A	#N/A	#N/A	#N/A
13	SLC15A4		transporter	Activated	4.221	0.000693	0.0122	CKAP4,CSNK1E,EZH2,F2R,FAM13B,FILIP1L,HMOX1,IFI16,IL1R1,MAP4K4,MARCKSL1,MMP2,MYOF,ST6GAL1,Tpm4,TRAM2,TSC22D1,VCAM1		SLC15A4		transporter	Activated	2.449	0.00486	0.0301	ADAMTS1,F2R,PLAUR,S100A6,SAT1,ST6GAL1		#N/A	#N/A	#N/A	#N/A	#N/A	#N/A	#N/A	#N/A
14	RETNLB		other	Activated	3.592	0.000735	0.0125	CASP3,FRZB,FZD6,IL13RA1,IL4R,MID1,MMP2,MSN,MYCT1,NR4A1,SFRP1,SOCS2,TGFB1		RETNLB		other	Activated	2.219	0.00261	0.02	ACTA2,CCN2,FRZB,MYCT1,TINAGL1		#N/A	#N/A	#N/A	#N/A	#N/A	#N/A	#N/A	#N/A
15	MRTFA	0.015	transcription regulator	Activated	2.459	0.0028	0.0328	ABLIM1,ACTB,CBFB,CDC42BPA,CLDN15,COL5A2,CTTN,DDAH1,EFNA5,F2R,HLA-A,ICAM1,ITGB1,LOX,MYL9,RAB27B,SELE,SELP,SERINC3,SORBS1,TAL1,THBS1,Tpm4,VCAM1		MRTFA	0.12	transcription regulator	Activated	2.377	0.00502	0.0308	ACTA2,CCN2,F2R,PFN1,SERINC3,SGK1,TAGLN,THBS1		#N/A	#N/A	#N/A	#N/A	#N/A	#N/A	#N/A	#N/A
	Upstream regulators inhibited by D but not reversed by APOC3 ASO
16	APOE	-0.71	transporter	Inhibited	-2.737	3.06e-10	6.21e-08	ACADL,ACTB,ADGRG1,ANGPTL4,ATXN3,BMP4,CAMK1,CASP3,CAV1,CPT1A,CTNNB1,CTSD,DIP2A,DYRK1A,EMILIN1,ESR1,F2R,GATA3,GLUL,HMOX1,HSP90B1,Hspa1b,ICAM1,IL4R,JAK2,LARGE1,LIPA,MAP2K3,MAP2K7,MMP2,MYBBP1A,MYLIP,NFKB1,P4HB,PCDH9,PHACTR1,PHF21A,PLAT,PLIN2,PMEPA1,PRKCQ,PSMC4,RPL10A,SELE,SERPINA3,SMARCD1,SORBS1,STAT3,STAT6,TGFB1,THY1,TIFA,TXNIP,VCAM1,VCAN,VCP		APOE	-0.043	transporter	Inhibited	-2.21	8.8e-07	4.38e-05	ABCA1,ACTA2,BCAM,CALR,CCN2,CCND2,CSRP1,CTSV,F2R,HPCAL1,HSP90AB1,HSP90B1,HSPA5,KLF4,NOS3,PLAT,THBD,TXNIP		#N/A	#N/A	#N/A	#N/A	#N/A	#N/A	#N/A	#N/A
17	mifepristone		chemical drug	Inhibited	-2.263	6.34e-06	0.000311	ACE,ALAS1,ARID4B,B2M,CAMK2D,CASP3,CAV1,CD74,CDKN1B,CEACAM1,COL5A2,Ctla2a/Ctla2b,CTSD,CTSF,DDIT4,FTH1,GJA1,HLA-A,HLA-DQB1,ICAM1,IL4R,IQGAP1,JAM2,LOX,Ly6a (includes others),MERTK,MNAT1,NR4A1,P2RX7,PELI1,PFKFB3,PLA2G4A,PLAT,PTN,RARA,SERPING1,SFRP1,SQSTM1,TGFB1,TIMP3,VCAN		mifepristone		chemical drug	Inhibited	-2.467	0.000188	0.00292	CCN2,CDKN1A,Ctla2a/Ctla2b,FAS,HSPA5,KLF4,KLF9,KRAS,Ly6a (includes others),NOS3,PLAT,RHOB,S100A6		mifepristone		chemical drug		0.452	0.0279	0.218	CASP8,CAST,CCN2,CD74,CEACAM1,FKBP5,GAS6,HLA-A,HLA-DQB1,HSPD1,JAM2,KRAS,MERTK,Mt1,NR3C1,PLA2G4A,RARA,SERPING1
18	PEAR1	-0.029	other	Inhibited	-2.53	0.000739	0.0125	COL5A2,FSTL1,ITGB1,LOX,MMP14,SERPINE2,SFRP1,Tpm1,Tpm4,VCAN		PEAR1	0.028	other	Inhibited	-2	0.00326	0.0232	ACTA2,Cald1,LGALS1,TAGLN		#N/A	#N/A	#N/A	#N/A	#N/A	#N/A	#N/A	#N/A
19	aspirin		chemical drug	Inhibited	-3.706	0.00163	0.0224	BMP6,CAV1,CD38,CDH5,CTSD,FBLN5,GHR,ICAM1,MCAM,MMP2,NPR1,PECAM1,PLA2G4A,RASGRF2,SELP,SMURF2,SOX4,TEK,TGFB1,THBS1,VCAM1		aspirin		chemical drug	Inhibited	-2.425	0.0188	0.0671	ABCA1,CD38,CDH5,CDKN1A,PECAM1,THBS1		#N/A	#N/A	#N/A	#N/A	#N/A	#N/A	#N/A	#N/A
20	KU-55933		chemical drug	Inhibited	-2.401	0.00439	0.0437	ACTN1,ANGPTL4,CFLAR,HMGCS1,THBS1,VCAM1		KU-55933		chemical drug	Inhibited	-2	0.000285	0.00395	ACTA2,CSRP1,TAGLN,THBS1		#N/A	#N/A	#N/A	#N/A	#N/A	#N/A	#N/A	#N/A

## Sheet: Fibro_IPA
	NDvsD_LCMV							NDvsD_STZ								cASOvsAPOC3_LCMV
	Ingenuity Canonical Pathways	-log(p-value)	Ratio	z-score	Molecules			Ingenuity Canonical Pathways	-log(p-value)	Ratio	z-score	Molecules				Ingenuity Canonical Pathways	-log(p-value)	Ratio	z-score	Molecules
Number of signficant pathways	Pathways increased by D and reversed by APOC3 ASO
1	RHO GTPase cycle	36.2	0.416	8.848	ABCD3,ABI1,ABI2,ABL2,ACBD5,ACTB,ACTG1,ACTN1,ADD3,AKAP12,AKAP13,ANKFY1,ANKLE2,ARFGAP3,ARHGAP1,ARHGAP10,ARHGAP12,ARHGAP17,ARHGAP20,ARHGAP21,ARHGAP23,ARHGAP24,ARHGAP29,ARHGAP31,ARHGAP32,ARHGAP35,ARHGAP42,ARHGAP5,ARHGDIA,ARHGEF1,ARHGEF10,ARHGEF11,ARHGEF12,ARHGEF25,ARHGEF28,ARHGEF6,BCAP31,BCR,C1QBP,CAPZB,CAVIN1,CCDC88A,CCT2,CCT6A,CDC37,CDC42BPA,CDC42BPB,CKAP4,CKB,CLTC,CPD,CPNE8,CPSF7,CUL3,CYFIP1,DAAM1…			RHO GTPase cycle	11.8	0.227	6.139	ACBD5,ACTG1,ACTN1,ARAP1,ARFGAP2,ARHGAP1,ARHGAP20,ARHGAP21,ARHGAP24,ARHGAP29,ARHGAP44,ARHGAP5,ARHGDIA,ARHGEF12,ARMCX3,BAIAP2,BRK1,C1QBP,CAV1,CAVIN1,CCT2,CDC42BPA,CDC42EP2,CDC42EP3,CDC42EP5,CKB,CLTC,CSK,CUL3,CYBA,DBN1,DLC1,DOCK10,DOCK4,DOCK6,DOCK7,DOCK9,EFHD2,EMD,ERBIN,FAM13B,FLOT1,GNA13,GPS1,HINT2,HMOX2,HNRNPC,HSP90AA1,HSP90AB1,HSPE1,ITGB1,KIDINS220,LAMTOR1,MACO1,MSI2,NCK1,NCKAP1,NDUFA5,NDUFS3,NSF…				RHO GTPase cycle	37.6	0.431	-9.19	ABCD3,ABI1,ABI2,ACBD5,ACTG1,ACTN1,ADD3,AKAP12,ALDH3A2,ANKFY1,ANKLE2,ARAP1,ARFGAP3,ARHGAP10,ARHGAP12,ARHGAP17,ARHGAP21,ARHGAP23,ARHGAP24,ARHGAP29,ARHGAP31,ARHGAP32,ARHGAP35,ARHGAP42,ARHGAP5,ARHGAP6,ARHGDIA,ARHGDIB,ARHGEF1,ARHGEF10,ARHGEF11,ARHGEF12,ARHGEF2,ARHGEF25,ARHGEF28,ARHGEF40,ARHGEF6,ARL13B,ARMCX3,BCR,CAPZB,CCDC88A,CCT2,CCT6A,CDC37,CDC42BPA,CDC42BPB,CDC42EP3,CDC42EP5,CDC42SE2,CKAP4,CKB,CLTC…
2	Class I MHC mediated antigen processing and presentation	24.8	0.389	5.628	ANAPC1,ANAPC10,ANAPC11,ANAPC4,ANAPC5,ARIH2,ASB3/GPR75-ASB3,BCAP31,BECN1,BLMH,BTBD1,BTRC,CALR,CANX,CBLB,CDC27,CHUK,CTSV,CUL1,CUL3,CUL5,DCAF1,ELOC,FBXL20,FBXL3,FBXL5,FBXL7,FBXO11,FBXO22,FBXO30,FBXO32,FBXO6,FBXW11,FBXW2,FBXW7,FBXW8,HECTD1,HECW2,HERC1,HERC2,HLA-A,HLA-E,HLA-G,HSPA5,HUWE1,ITCH,KEAP1,KLHL21,KLHL5,KLHL9,LNPEP,LTN1,MEX3C,MGRN1,MKRN1,MYD88,MYLIP,NEDD4L,NPEPPS,PDIA3,PJA2,PRKN,PSMA6,PSMB4,PS…			Class I MHC mediated antigen processing and presentation	21.5	0.293	8.2	ANAPC11,ANAPC13,ANAPC5,ASB3/GPR75-ASB3,B2M,BTBD1,CALR,CDC16,CDC26,CTSV,CUL3,CUL5,CYBA,ELOC,FBXL3,FBXL5,FBXO11,FBXO31,FBXO4,FBXO6,FBXO9,FBXW2,HECTD1,HERC1,HERC2,HLA-A,HLA-E,HSPA5,LNPEP,MEX3C,MGRN1,MKRN1,MYLIP,PDIA3,PJA2,PSMA1,PSMA2,PSMA3,PSMA5,PSMA6,PSMA7,PSMB1,PSMB2,PSMB3,PSMB4,PSMB5,PSMB6,PSMB7,PSMC1,PSMC2,PSMC4,PSMC5,PSMC6,PSMD12,PSMD13,PSMD3,PSMD4,PSMD6,PSMD7,PSMD8,PSMD9,PSME2,PSME4,RBBP6,RCHY…				Class I MHC mediated antigen processing and presentation	22.9	0.389	-6.952	ANAPC1,ANAPC10,ANAPC11,ANAPC13,ANAPC4,ANAPC5,ARIH2,BECN1,BTBD1,BTRC,CALR,CANX,CDC26,CHUK,CUL1,CUL3,CYBA,DCAF1,ERAP1,FBXL20,FBXL7,FBXO11,FBXO22,FBXO30,FBXO4,FBXO6,FBXW11,FBXW2,FBXW7,FBXW8,HECTD1,HECW2,HERC1,HERC4,HLA-A,HLA-G,HSPA5,HUWE1,ITCH,KEAP1,KLHL13,KLHL21,KLHL5,KLHL9,LRRC41,MEX3C,MGRN1,MRC2,MYLIP,NEDD4L,NPEPPS,PDIA3,PJA1,PJA2,PRKN,PSMA1,PSMA7,PSMB10,PSMB4,PSMB7,PSMB8,PSMC3,PSMC6,PSMD1,PSMD11…
3	Protein Ubiquitination Pathway	21.3	0.41	4.31	ANAPC1,ANAPC10,ANAPC11,ANAPC4,ANAPC5,BIRC2,BIRC3,BIRC6,BTRC,CUL1,DNAJA1,DNAJB1,DNAJB12,DNAJB4,DNAJB6,DNAJC1,DNAJC10,DNAJC13,DNAJC18,DNAJC3,DNAJC5,DNAJC8,ELOC,FBXW7,HLA-A,HLA-E,HLA-G,HSP90AA1,HSP90AB1,HSP90B1,HSPA13,HSPA1A/HSPA1B,HSPA4,HSPA5,HSPA8,HSPA9,HSPB1,HSPB7,HSPB8,HSPE1,HSPH1,MR1,NEDD4L,PRKN,PSMA6,PSMB4,PSMB7,PSMC1,PSMC3,PSMD1,PSMD11,PSMD12,PSMD13,PSMD2,PSMD3,PSMD4,PSMD7,PSMD8,PSME2,SMO,SMU…			Protein Ubiquitination Pathway	30	0.377	6.799	AMFR,ANAPC11,ANAPC5,B2M,BAG1,BIRC2,CRYAB,DNAJA1,DNAJB1,DNAJB11,DNAJB2,DNAJB4,DNAJB6,DNAJB9,DNAJC1,DNAJC15,DNAJC19,DNAJC4,DNAJC7,ELOC,HLA-A,HLA-E,HSP90AA1,HSP90AB1,HSP90B1,HSPA4,HSPA5,HSPA8,HSPA9,HSPB1,HSPB2,HSPB7,HSPB8,HSPE1,HSPH1,MR1,PSMA1,PSMA2,PSMA3,PSMA5,PSMA6,PSMA7,PSMB1,PSMB2,PSMB3,PSMB4,PSMB5,PSMB6,PSMB7,PSMC1,PSMC2,PSMC4,PSMC5,PSMC6,PSMD12,PSMD13,PSMD3,PSMD4,PSMD6,PSMD7,PSMD8,PSMD9,PSME2,…				Protein Ubiquitination Pathway	24.9	0.443	-7.365	ANAPC1,ANAPC10,ANAPC11,ANAPC4,ANAPC5,BIRC6,BTRC,CBL,CUL1,DNAJA1,DNAJB1,DNAJB11,DNAJB12,DNAJB14,DNAJB2,DNAJB6,DNAJB9,DNAJC1,DNAJC10,DNAJC13,DNAJC15,DNAJC18,DNAJC19,DNAJC25,DNAJC3,DNAJC4,DNAJC5,DNAJC8,FBXW7,HLA-A,HLA-G,HSP90AA1,HSP90AB1,HSP90B1,HSPA14,HSPA2,HSPA4,HSPA5,HSPA9,HSPD1,MR1,NEDD4L,PRKN,PSMA1,PSMA7,PSMB10,PSMB4,PSMB7,PSMB8,PSMC3,PSMC6,PSMD1,PSMD11,PSMD12,PSMD2,PSMD3,PSMD4,PSMD6,PSMD9,PSME…
4	Pulmonary Fibrosis Idiopathic Signaling Pathway	20.7	0.383	5.182	ACTA2,ACTB,ACTG1,ACVR2A,ADAM10,AEBP2,AKT3,AXL,BCL2,BMPR2,BRAF,CCN2,COL12A1,COL15A1,COL16A1,COL1A1,COL3A1,COL4A2,COL4A5,COL5A2,COL6A1,COL6A2,COL6A3,COL8A1,CREBBP,CXCL12,EDNRA,EGFR,EGR1,EIF4EBP1,EIF4EBP2,EP300,EZH1,EZH2,FGF2,FGFR1,FGFR2,FN1,FOS,FOXO1,FOXO3,FZD1,FZD2,FZD4,GNA12,GRB2,GSK3B,IL13RA1,IL17RA,IL6,IL6ST,ITGAV,ITGB1,JAK2,JARID2,JUN,LATS1,LATS2,LPAR1,MAP2K1,MAP2K4,MAPK1,MAPK14,MAPK3,MAPK8,MA…			Pulmonary Fibrosis Idiopathic Signaling Pathway	18.4	0.291	3.128	ACTA2,ACTG1,ACVR1,ADAMTS1,AKT1,AKT2,AKT3,ATF2,AXL,BAX,BMPR2,CAV1,CCN2,COL12A1,COL15A1,COL1A1,COL1A2,COL3A1,COL4A1,COL4A2,COL4A3,COL4A4,COL4A5,COL6A1,COL6A2,COL6A6,CTNNB1,EGR1,EIF4EBP1,EIF4EBP2,EP300,EZH1,F2R,FGFR1,FGFR2,FGFRL1,FN1,FOS,FZD2,FZD4,GNA13,GSK3B,HES1,HRAS,IL11RA,IL13RA1,IL6ST,ILK,ITGAV,ITGB1,JUN,LATS2,LPAR1,MAP2K1,MAP2K3,MAPK3,MMP2,MMP23B,NOX4,PDGFA,PDGFD,PDGFRA,PEX13,PIK3C2A,PIK3R2,PO…				Pulmonary Fibrosis Idiopathic Signaling Pathway	19.1	0.383	-6.338	ACTA2,ACTG1,ACVR1,ACVR2A,ADAM10,ADAMTS1,AEBP2,AKT1,AKT2,AKT3,ARAF,ATF2,BCL2,BMPR2,BRAF,CCN2,COL1A1,COL1A2,COL3A1,COL4A5,COL4A6,COL5A1,COL6A1,COL6A2,COL8A1,CREBBP,CTNNB1,CXCL12,EGFR,EIF4EBP1,EIF4EBP2,EP300,EZH1,EZH2,F2R,FGF2,FGFR1,FGFR2,FGFRL1,FOS,FZD2,FZD4,FZD7,GNA12,GNA13,GRB2,GSK3B,IL11RA,IL13RA1,IL17RA,IL6ST,ITGAV,ITGB1,JAG1,JAK2,JARID2,KRAS,LATS1,LPAR1,MAP2K1,MAP2K3,MAP2K4,MAPK1,MAPK14,MAPK8,…
5	Hepatic Fibrosis Signaling Pathway	20.5	0.355	4.066	ACTA2,ACVR2A,AKT3,APC,AXIN1,BAMBI,BCL2,BMPR2,BRAF,CACNA1A,CACNA1C,Calm1 (includes others),CCDC88A,CCN2,Cdc42,CDKN1B,CHUK,COL1A1,COL3A1,CREB1,CREB3,CREB3L2,CREB5,CREBBP,CSNK1A1,CSNK1D,CSNK1E,CSNK1G1,CSNK1G3,EDNRA,EZH2,FGF2,FGFR1,FLT1,FNBP1,FOS,FOXO1,FTH1,FTL,FZD1,FZD2,FZD4,GLI3,GNAI2,GNAI3,GSK3B,HIF1A,ICAM1,IL17RA,IL1R1,IL1RAP,IL33,IRAK1,IRAK3,IRS2,ITGA1,ITGA5,ITGA9,ITGAV,ITGB1,ITGB5,ITGB8,JAK1,JA…			Hepatic Fibrosis Signaling Pathway	12.8	0.237	2.985	ACTA2,ACVR1,AKT1,AKT2,AKT3,APC,ATF2,BAMBI,BMPR2,CACNA1A,CACNA1C,Calm1 (includes others),CCN2,CEBPB,COL1A1,COL1A2,COL3A1,CREB3L1,CREB3L2,CREB5,CSNK1A1,CSNK1E,CTNNB1,FGFR1,FLT1,FOS,FTH1,FTL,FZD2,FZD4,GLIS2,GSK3B,HIF1A,HRAS,IL1R1,IL33,IRAK1,ITGA8,ITGAV,ITGB1,ITGB5,JUN,KLF9,LRP1,MAP2K1,MAP2K2,MAP2K3,MAPK3,MYL12A,MYL12B,MYL6,MYL9,NOX4,PDCD4,PDGFA,PDGFD,PDGFRA,PIK3C2A,PIK3R2,PRKAR1A,PRKCA,PTCH1,PTEN,PT…				Hepatic Fibrosis Signaling Pathway	17.9	0.35	-4.67	ACTA2,ACVR1,ACVR2A,AKT1,AKT2,AKT3,APC,ARAF,ATF2,ATF4,BAMBI,BCL2,BMPR2,BRAF,CACNA1A,CACNA2D1,Calm1 (includes others),CCDC88A,CCN2,CDKN1B,CEBPB,CHUK,COL1A1,COL1A2,COL3A1,CREB1,CREB3,CREB3L1,CREB3L2,CREB5,CREBBP,CSNK1A1,CSNK1D,CSNK1E,CSNK1G1,CSNK1G2,CSNK1G3,CTNNB1,EZH2,FGF2,FGFR1,FLT1,FNBP1,FOS,FTH1,FZD2,FZD4,FZD7,GLI3,GNAI1,GNAI2,GNAI3,GSK3B,HIF1A,ICAM1,IL17RA,IL1R1,IL1RAP,IL33,IRAK1,IRAK3,IRS2,ITG…
6	Autophagy	19.4	0.429	4.346	AKT1S1,AKT3,AMBRA1,ARNT,ATG10,ATG12,ATG13,ATG3,BCL2,BECN1,BIRC6,BNIP3,Calm1 (includes others),CAMKK2,CDKN1B,CHP1,CREB1,CREB3,CREB3L2,CREB5,CREBBP,DAPK1,DRAM1,EIF2A,ERN1,FGF2,FOS,FOXO1,FOXO3,GABARAP,GABARAPL1,GNAI3,GORASP2,GSK3B,HIF1A,IGF1,INSR,IRS2,JUN,LAMP1,LAMP2,MAP1LC3B,MAP2K1,MAP2K4,MAPK1,MAPK3,MAPK8,MAPK9,MYC,MYD88,NFKB1,NFKB2,NRBF2,OPTN,PI4K2A,PIK3C2A,PIK3CA,PIK3R1,PIK3R2,PPP2CA,PPP2CB,PPP2…			Autophagy	5.98	0.226	3.833	AKT1,AKT2,AKT3,ATF2,ATG12,ATG3,ATG5,BAD,BNIP3,Calm1 (includes others),CAMKK2,CHP1,CREB3L1,CREB3L2,CREB5,DAPK1,DAPK3,DDIT3,FOS,GABARAP,GABARAPL2,GORASP2,GSK3B,HIF1A,JUN,LAMP2,MAP1LC3A,MAP1LC3B,MAP2K1,MAP2K2,MAPK3,PIK3C2A,PIK3R2,PPP2CA,PPP3CB,PPP3R1,PRKAR1A,PTEN,RAB7A,RAF1,RALB,RB1CC1,TGFB1,TGFB2,TLR4,TNFRSF11B,TNFRSF1A,TP53,UVRAG				Autophagy	18.1	0.429	-4.346	AKT1,AKT1S1,AKT2,AKT3,AMBRA1,ARL8B,ARNT,ATF2,ATF4,ATG10,ATG12,ATG13,ATG3,ATG4B,ATG5,BCL2,BECN1,BIRC6,Calm1 (includes others),CAMKK2,CDKN1B,CREB1,CREB3,CREB3L1,CREB3L2,CREB5,CREBBP,DAPK3,DDIT3,DRAM1,EIF2A,EIF2AK3,ERN1,FGF2,FOS,FUNDC1,GABARAPL1,GNAI3,GORASP2,GSK3B,HIF1A,INSR,IRS1,IRS2,LAMP1,MAP1LC3A,MAP2K1,MAP2K4,MAPK1,MAPK8,NFKB1,NFKB2,OPTN,PI4K2A,PIK3C2A,PIK3CA,PPP2CA,PPP2CB,PPP2R1A,PPP2R2A,PPP2R…
7	Estrogen Receptor Signaling	18.7	0.347	4.421	ADCY5,AKT3,BCL2,CACNA1A,CACNA1C,CARM1,CDK8,CDKN1A,CFL2,CREB1,CREB3,CREB3L2,CREB5,CREBBP,DDX5,EGFR,EIF4EBP1,EP300,ESR1,FBXO32,FOS,FOXO1,FOXO3,GNA12,GNAI2,GNAI3,GNAO1,GNAQ,GNB4,GNG10,GNG11,GNG12,GNG5,GPS2,GRB2,GSK3B,GUCY1A1,GUCY1B1,HDAC3,HIF1A,HNRNPD,HSP90AA1,HSP90AB1,HSP90B1,IGF1,IGF1R,JAK1,JAK2,JUN,MAP2K1,MAPK1,MAPK3,MCU,MED13,MED13L,MED14,MED15,MED31,MED6,MMP14,MMP19,MMP2,MMP23B,MMP3,MPRIP,MYC,M…			Estrogen Receptor Signaling	21.3	0.284	3.801	ADCY7,AKT1,AKT2,AKT3,ATF2,BAD,CACNA1A,CACNA1C,CAV1,CCNC,CDK8,CDKN1A,CFL1,CFL2,CREB3L1,CREB3L2,CREB5,CTBP1,CYC1,EIF4E,EIF4EBP1,EP300,ESR1,FOS,GNA13,GNAS,GNB1,GNB2,GNB4,GNG10,GNG5,GSK3B,GUCY1A1,HES1,HIF1A,HNRNPD,HRAS,HSP90AA1,HSP90AB1,HSP90B1,JUN,MAP2K1,MAP2K2,MAPK3,MCU,MDK,MED10,MED13,MED13L,MED14,MED21,MED30,MED31,MED6,MMP2,MMP23B,MYL12A,MYL12B,MYL6,MYL9,NDUFA11,NDUFA12,NDUFA2,NDUFA3,NDUFA4L2,NDU…				Estrogen Receptor Signaling	17.5	0.35	-5.14	ADCY7,AKT1,AKT2,AKT3,ATF2,ATF4,BCL2,CACNA1A,CACNA2D1,CARM1,CCNC,CDK8,CDKN1A,CFL1,CREB1,CREB3,CREB3L1,CREB3L2,CREB5,CREBBP,CTBP1,DDX5,DLG4,EGFR,EIF4E,EIF4EBP1,EP300,ESR1,FOS,GNA11,GNA12,GNA13,GNAI1,GNAI2,GNAI3,GNAO1,GNAQ,GNAS,GNB4,GNG11,GNG12,GNG5,GPS2,GRB2,GSK3B,GUCY1A1,HDAC3,HIF1A,HNRNPD,HSP90AA1,HSP90AB1,HSP90B1,IGF1R,IGF2R,JAK1,JAK2,KRAS,MAP2K1,MAPK1,MCU,MDK,MED1,MED10,MED13,MED14,MED6,MMP14,M…
8	Neutrophil degranulation	17.4	0.326	4.739	ACTR10,ACTR1B,ADAM10,AGA,AHSG,ANO6,ANPEP,ANXA2,AP2A2,ARL8A,ARMC8,ARPC5,ARSA,ARSB,ATP11A,ATP11B,ATP6AP2,ATP6V0A1,ATP6V0C,ATP6V1D,B4GALT1,C1orf35,C3,CAB39,CANT1,CAP1,CAT,CCT2,CCT8,CD47,CDK13,CKAP4,COPB1,CPNE1,CREG1,CRISPLD2,CSTB,CTSA,CTSB,CTSD,CTSH,CYFIP1,DGAT1,DIAPH1,DNAJC13,DNAJC3,DNAJC5,DPP7,DYNC1H1,DYNLL1,EEF1A1,EEF2,ERP44,FAF2,FGL2,FTH1,FTL,FUCA1,GAA,GDI2,GGH,GLB1,GM2A,GNS,GRN,GSN,GSTP1,GUSB,H…			Neutrophil degranulation	17	0.25	7.975	ACAA1,ACTR10,ACTR2,AGA,ALDOA,ANO6,ANPEP,ANXA2,APRT,ARL8A,ARPC5,ASAH1,ATP11A,ATP6AP2,ATP6V1D,B2M,B4GALT1,BRI3,CCT2,CD47,CMTM6,CNN2,COMMD3,CPNE1,CRISPLD2,CSNK2B,CST3,CSTB,CTSA,CTSB,CTSD,CTSH,CTSZ,CYBA,DDX3X,DEGS1,DPP7,DYNC1H1,EEF1A1,ERP44,FABP5,FTH1,FTL,FUCA1,GDI2,GGH,GM2A,GNS,GOLGA7,GPI,GSN,GSTP1,HMOX2,HSP90AA1,HSP90AB1,HSPA8,IDH1,ITGAV,KCMF1,LAMP2,LAMTOR1,LAMTOR2,LAMTOR3,MAN2B1,MGST1,MIF,NCSTN,ND…				Neutrophil degranulation	13.1	0.311	-5.754	ACAA1,ACLY,ACTR10,ADAM10,ANO6,ANPEP,AP2A2,APAF1,ARL8A,ARMC8,ARPC5,ARSA,ATP11A,ATP11B,ATP6AP2,B4GALT1,C1orf35,C3,CAB39,CANT1,CAP1,CAT,CCT2,CCT8,CD44,CD55,CDK13,CKAP4,CMTM6,CNN2,COPB1,CPNE1,CPNE3,CREG1,CRISPLD2,CST3,CSTB,CTSA,CTSH,CTSZ,CYBA,DBNL,DDOST,DGAT1,DIAPH1,DNAJC13,DNAJC3,DNAJC5,DPP7,DYNLL1,EEF1A1,EEF2,ERP44,FABP5,FAF2,FTH1,FUCA1,GAA,GDI2,GGH,GM2A,GNS,GSN,GSTP1,GUSB,HEXB,HMOX2,HSP90AA1,HSP90…
9	Myelination Signaling Pathway	16.7	0.358	3.975	ACVR2A,ADAM17,AKT1S1,AKT3,APC,APH1A,ARHGAP1,ARHGAP12,ARHGAP35,ARHGAP5,AXIN1,BACE1,BMP4,BMPR1A,BMPR2,BRAF,Calm1 (includes others),CHD8,CHP1,CNTN6,CREB1,CREB3,CREB3L2,CREB5,CREBBP,DAG1,DLC1,EGFR,EIF4EBP1,EP300,ERBB4,FGF2,FGFR1,FGFR2,FKBP1A,FOS,FYN,FZD1,FZD2,FZD4,GLI3,GRB2,GSK3B,HDAC1,HDAC3,HDAC5,HDAC7,HDAC8,HDAC9,ID2,IGF1,IGF1R,ITGB1,ITGB5,ITGB8,JUN,LAMA2,LAMA4,LAMB1,LAMB2,LAMC1,LAMC3,MAP2K1,MAPK1,…			Myelination Signaling Pathway	10.3	0.239	3.397	ACVR1,AKT1,AKT2,AKT3,APC,APH1A,ARHGAP1,ARHGAP5,ATF2,BMP1,BMPR1A,BMPR2,Calm1 (includes others),CHP1,CREB3L1,CREB3L2,CREB5,CTNNB1,DLC1,EIF4E,EIF4EBP1,EP300,FGFR1,FGFR2,FGFRL1,FKBP1A,FOS,FZD2,FZD4,GLIS2,GSK3B,HDAC2,HRAS,ID4,ILK,ITGB1,ITGB5,JUN,LAMA2,LAMB1,LAMC1,MAP2K1,MAP2K2,MAPK3,NCSTN,NDRG1,NFATC3,NTF3,PDGFA,PDGFD,PDGFRA,PIK3C2A,PIK3R2,PPP3CB,PPP3R1,PRKAR1A,PSENEN,PTEN,PTK2,PTPN11,RAF1,RALB,RAP1A,…				Myelination Signaling Pathway	17.5	0.373	-4.346	ACVR1,ACVR2A,ACVRL1,ADAM17,AKT1,AKT1S1,AKT2,AKT3,APC,APH1A,ARAF,ARHGAP12,ARHGAP35,ARHGAP5,ARHGAP6,ATF2,ATF4,BACE1,BMP4,BMPR1A,BMPR2,BRAF,Calm1 (includes others),CHD8,CNTN6,CREB1,CREB3,CREB3L1,CREB3L2,CREB5,CREBBP,CTNNB1,DAG1,DLC1,EGFR,EIF4E,EIF4EBP1,EP300,FGF2,FGFR1,FGFR2,FGFRL1,FOS,FZD2,FZD4,FZD7,GLI3,GRB2,GSK3B,HDAC1,HDAC3,HDAC4,HDAC5,HDAC7,HDAC8,IGF1R,IGF2R,IRS1,ITGB1,ITGB5,ITGB8,KRAS,LAMA4,LA…
10	Deubiquitination	16.4	0.38	6.4	ACTB,APC,ASXL1,ASXL2,ATXN7,AXIN1,BABAM1,BABAM2,BECN1,BIRC2,BIRC3,CYLD,EP300,ESR1,FKBP8,HCFC1,HIF1A,IDE,IL33,INO80,INO80B,INO80D,KAT2B,KEAP1,MAT2B,MBD5,MDM4,MYC,MYSM1,NEDD8,NFKBIA,NOD1,OGT,OTUD7B,PRKN,PSMA6,PSMB4,PSMB7,PSMC1,PSMC3,PSMD1,PSMD11,PSMD12,PSMD13,PSMD2,PSMD3,PSMD4,PSMD7,PSMD8,PSME2,PSME4,RAD23B,RHOA,RHOT1,RIPK2,RNF146,SEM1,SIAH2,SMAD1,SMAD3,SMAD4,SMAD7,SMURF2,SNX3,STAM,STAM2,STAMBPL1,TG…			Deubiquitination	15.7	0.297	7.473	ACTL6A,ADRM1,APC,AR,BIRC2,EP300,ESR1,HIF1A,IL33,KAT2B,MAT2B,MBD5,NEDD8,OGT,OTUD7B,PSMA1,PSMA2,PSMA3,PSMA5,PSMA6,PSMA7,PSMB1,PSMB2,PSMB3,PSMB4,PSMB5,PSMB6,PSMB7,PSMC1,PSMC2,PSMC4,PSMC5,PSMC6,PSMD12,PSMD13,PSMD3,PSMD4,PSMD6,PSMD7,PSMD8,PSMD9,PSME2,PSME4,PTEN,RAD23A,RAD23B,RHOA,RNF146,RPS27A,SMAD3,SMAD4,SMAD7,SNX3,SUDS3,TAF10,TGFB1,TGFBR1,TNKS,TOMM20,TOMM70,TP53,UBC,UCHL1,UCHL5,UFD1,UIMC1,USP14,USP1…				Deubiquitination	16.1	0.388	-7.525	ACTL6A,APC,AR,ARRB1,ASXL1,ASXL2,ATXN7,BABAM1,BABAM2,BECN1,CYLD,EP300,ESR1,FKBP8,HCFC1,HIF1A,IDE,IL33,INO80,INO80D,INO80E,JOSD2,KAT2B,KEAP1,MBD5,MDM4,MYSM1,NOD1,OGT,PRKN,PSMA1,PSMA7,PSMB10,PSMB4,PSMB7,PSMB8,PSMC3,PSMC6,PSMD1,PSMD11,PSMD12,PSMD2,PSMD3,PSMD4,PSMD6,PSMD9,PSME1,PSME4,RAD23A,RAD23B,RHOT1,RIPK2,RNF146,RUVBL1,SEM1,SIAH2,SMAD1,SMAD3,SMAD4,SMAD7,SMURF2,SNX3,STAM,STAM2,STAMBPL1,SUDS3,TAF10,…
11	Histone Modification Signaling Pathway	16.3	0.366	6.928	ASH1L,ATAD2,ATAD2B,ATRX,BAZ1B,BAZ2A,BAZ2B,BPTF,BRD1,BRD3,BRD7,BRWD1,CARM1,CBX4,CBX5,CBX6,CDYL,CHD1,CHD4,CHUK,CREBBP,CSNK2A1,CSNK2A2,DNMT3A,DOT1L,EHMT1,EHMT2,EP300,ESR1,EZH1,EZH2,FOXO1,GLYR1,H1-0,H3-3A/H3-3B,HDAC1,HDAC3,HDAC5,HP1BP3,ING1,ING2,ING3,ING5,KAT2B,KAT6A,KAT7,KDM1A,KDM2A,KDM3A,KDM3B,KDM5A,KDM5B,KDM6A,KDM7A,KMT2A,KMT2C,KMT2E,KMT5B,L3MBTL3,MAP2K4,MAPK8,MAPK9,MBTD1,MLLT10,MMP2,MORC3,MORF4L1…			Histone Modification Signaling Pathway	0.954	0.136	4.743	AR,ATF2,ATRX,BRD1,BRD3,CBX3,CBX6,CDK9,CHD1,CSNK2A1,CSNK2B,EHMT1,EP300,ESR1,EZH1,H3-3A/H3-3B,HDAC2,KAT2B,KDM6B,MMP2,MORC3,MORF4L1,NSD1,NSD3,PBRM1,PHF1,PKD1,PRMT1,RNF20,SMNDC1,SUMO1,SUMO3,TDRD3,TRIM33,VEGFB,VEGFD,YWHAE,YWHAH,YWHAQ,YWHAZ				Histone Modification Signaling Pathway	18.8	0.393	-6.499	AR,ASH1L,ATAD2,ATAD2B,ATF2,ATRX,BAZ1B,BAZ2A,BAZ2B,BPTF,BRD1,BRD2,BRD3,BRWD1,CARM1,CBX1,CBX3,CBX4,CBX5,CBX6,CDYL,CHD1,CHD4,CHUK,CREBBP,CSNK2A1,CSNK2A2,DNMT3A,DOT1L,EHMT1,EP300,ESR1,EZH1,EZH2,GLYR1,H1-0,HDAC1,HDAC3,HDAC4,HDAC5,HDGFL2,HP1BP3,ING1,ING2,ING4,ING5,JMJD6,KAT2B,KAT6A,KAT7,KDM1A,KDM2A,KDM3A,KDM3B,KDM4C,KDM5A,KDM5B,KDM6A,KDM6B,KDM7A,KMT2A,KMT2C,KMT2D,KMT2E,KMT5B,MAP2K4,MAPK8,MBTD1,MLLT10,M…
12	Protein Sorting Signaling Pathway	15.8	0.427	3.9	ADCY5,AP1G1,AP1S2,AP3B1,AP3D1,AP3S1,ARCN1,ARFGAP1,ARFGEF1,ARFGEF2,CLINT1,CLTB,CLTC,COPA,COPB1,COPB2,COPE,COPZ1,COPZ2,DNM2,FYN,GGA2,GNAQ,GOLGA4,GUCY1A1,GUCY1B1,HMOX1,KDELR1,LMAN1,MIA3,PI4K2A,PLD1,PLD3,PLPP3,PREB,PRKACB,PRKAG1,PRKAG2,PRKD1,RAB11B,RER1,SACM1L,SAR1A,SEC23A,SEC23B,SEC24A,SEC24B,SEC24C,SEC24D,SEC31A,SERPINH1,SNX1,SNX12,SNX13,SNX14,SNX17,SNX2,SNX24,SNX29,SNX3,SNX33,SNX4,SNX6,SNX7,SNX9,S…			Protein Sorting Signaling Pathway	4.22	0.213	4.542	ADCY7,AP1S1,AP1S2,AP3S1,AP4S1,CLINT1,CLTA,CLTB,CLTC,COPE,CTBP1,GGA2,GNAS,GUCY1A1,KDELR2,PLPP3,PRKAR1A,RAB11A,RER1,SAR1A,SCARB2,SEC23A,SEC24D,SERPINH1,SNX18,SNX2,SNX3,SNX4,SNX7,TMED1,TMED2,TMED3,TMED5,TMED7,VPS26A,VPS29,VPS35,WASHC3				Protein Sorting Signaling Pathway	18.4	0.461	-5.301	ADCY7,AP1G1,AP1S1,AP3B1,AP3D1,AP4S1,ARCN1,ARF1,ARFGEF1,ARFGEF2,CLINT1,CLTB,CLTC,COPA,COPB1,COPB2,COPG1,COPZ1,COPZ2,CTBP1,DNM2,GCC1,GGA2,GNAQ,GNAS,GOLGA4,GUCY1A1,HMOX1,IGF2R,KDELR1,KDELR2,KDELR3,LMAN1,M6PR,MIA3,PI4K2A,PLPP3,PREB,PRKACA,PRKACB,PRKAG1,PRKAG2,RAB11A,RAB11B,SACM1L,SAR1A,SEC13,SEC23A,SEC24A,SEC24B,SEC24C,SEC24D,SEC31A,SERPINH1,SNX10,SNX12,SNX13,SNX14,SNX17,SNX18,SNX2,SNX24,SNX29,SNX3,S…
13	Role of Macrophages, Fibroblasts and Endothelial Cells in Rheumatoid Arthritis	15.5	0.348	3.714	AKT3,APC,AXIN1,Calm1 (includes others),CAMK2D,CEBPD,CEBPG,CEBPZ,CHP1,CHUK,CREB1,CREB3,CREB3L2,CREB5,CREBBP,CSF1,CSNK1A1,CSNK1D,CSNK1E,CSNK1G1,CSNK1G3,CXCL12,DAAM1,DKK3,FGF2,FN1,FOS,FRZB,FZD1,FZD2,FZD4,GNAO1,GNAQ,GSK3B,ICAM1,IL17RA,IL1R1,IL1RAP,IL33,IL6,IL6R,IL6ST,IRAK1,IRAK3,JAK2,JUN,LRP1,LRP5,LRP6,LTBR,MAP2K1,MAP2K4,MAP3K14,MAPK1,MAPK14,MAPK3,MAPK9,MAPKAPK2,MMP3,MYC,MYD88,NFAT5,NFATC1,NFKB1,NFKB…			Role of Macrophages, Fibroblasts and Endothelial Cells in Rheumatoid Arthritis	7.28	0.213	3.586	AKT1,AKT2,AKT3,APC,ATF2,Calm1 (includes others),CAMK2D,CEBPB,CEBPZ,CHP1,CREB3L1,CREB3L2,CREB5,CSF1,CSNK1A1,CSNK1E,CTNNB1,FN1,FOS,FZD2,FZD4,GSK3B,HRAS,IL1R1,IL33,IL6ST,IRAK1,JUN,LRP1,LTBR,MAP2K1,MAP2K2,MAP2K3,MAPK3,MAPKAPK2,MIF,NFAT5,NFATC3,PDGFA,PDGFD,PDIA3,PIK3C2A,PIK3R2,PLCB4,PLCL1,PPP3CB,PPP3R1,PRKCA,RAF1,RALB,RAP1A,RAP1B,RHOA,ROCK1,ROCK2,RRAS,RRAS2,RYK,SFRP2,SFRP4,SOST,TCF4,TGFB1,TLR4,TNFRSF1…				Role of Macrophages, Fibroblasts and Endothelial Cells in Rheumatoid Arthritis	11	0.324	-3.657	AKT1,AKT2,AKT3,APC,ATF2,ATF4,Calm1 (includes others),CAMK2D,CEBPB,CEBPD,CEBPG,CEBPZ,CHUK,CREB1,CREB3,CREB3L1,CREB3L2,CREB5,CREBBP,CSF1,CSNK1A1,CSNK1D,CSNK1E,CSNK1G1,CSNK1G2,CSNK1G3,CTNNB1,CXCL12,DAAM1,DKK3,FGF2,FOS,FRZB,FZD2,FZD4,FZD7,GNAO1,GNAQ,GSK3B,ICAM1,IL17RA,IL1R1,IL1RAP,IL33,IL6R,IL6ST,IRAK1,IRAK3,JAK2,KRAS,LRP6,LTBR,MAP2K1,MAP2K3,MAP2K4,MAP3K14,MAPK1,MAPK14,MAPKAPK2,MMP3,NFAT5,NFATC1,NFKB…
14	IGF-1 Signaling	15	0.505	3.317	AKT3,CCN2,CCN3,CSNK2A1,CSNK2A2,FOS,FOXO1,FOXO3,GRB10,GRB2,IGF1,IGF1R,IGFBP5,IGFBP6,IRS2,JAK1,JAK2,JUN,MAP2K1,MAPK1,MAPK3,MAPK8,NRAS,PDPK1,PIK3C2A,PIK3CA,PIK3R1,PIK3R2,PRKACB,PRKAG1,PRKAG2,PRKCI,PTK2,PTPN11,PXN,RALB,RAP1B,RAP2A,RAP2B,RASA1,RPS6KB1,RRAS2,SHC1,SOCS1,SOCS2,SOCS3,SOCS4,SOCS5,SOS2,STAT3,YWHAB,YWHAE,YWHAG			IGF-1 Signaling	11.5	0.371	2.268	AKT1,AKT2,AKT3,BAD,CCN1,CCN2,CCN3,CSNK2A1,CSNK2B,FOS,HRAS,IGFBP4,IGFBP5,IGFBP6,IGFBP7,JUN,MAP2K1,MAP2K2,MAPK3,PIK3C2A,PIK3R2,PRKAR1A,PTK2,PTPN11,PXN,RAF1,RALB,RAP1A,RAP1B,RASA1,RPS6KB1,RRAS,RRAS2,SHC1,SOCS2,YWHAE,YWHAH,YWHAQ,YWHAZ				IGF-1 Signaling	13.5	0.495	-3.015	AKT1,AKT2,AKT3,CCN2,CCN3,CSNK2A1,CSNK2A2,FOS,GRB10,GRB2,IGF1R,IGFBP5,IGFBP7,IRS1,IRS2,JAK1,JAK2,KRAS,MAP2K1,MAPK1,MAPK8,NRAS,PDPK1,PIK3C2A,PIK3CA,PRKACA,PRKACB,PRKAG1,PRKAG2,PRKCI,PTK2,PTPN11,PXN,RALA,RALB,RAP1A,RAP1B,RAP2A,RAP2B,RASA1,RPS6KB1,RRAS2,SHC1,SOCS4,SOCS5,SOS1,SOS2,STAT3,YWHAB,YWHAE,YWHAG,YWHAQ
15	Senescence Pathway	14.9	0.355	4.491	ACVR2A,AKT3,ANAPC1,ANAPC10,ANAPC11,ANAPC4,ANAPC5,ASXL1,ASXL2,ATF3,BHLHE40,BMPR2,BRAF,CACNA1A,CACNA1C,Calm1 (includes others),CAPN2,CAPN7,CAPNS1,CAT,CCND2,CCND3,CDC27,CDKN1A,CDKN1B,CHP1,CHUK,CREBBP,DLAT,DLD,EIF4EBP1,ELF1,ELF2,ELF4,ELK3,EP300,EP400,ETS2,EZH2,FOXO3,GADD45G,HBP1,HIPK2,IL6,ING1,IRF3,ITPR2,ITSN2,JUN,KAT2B,MAP2K1,MAP2K4,MAP2K5,MAPK1,MAPK14,MAPK3,MAPK6,MAPKAPK2,MCU,NF1,NFAT5,NFATC1,NFKB1…			Senescence Pathway	9.35	0.237	4.41	ACVR1,AKT1,AKT2,AKT3,ANAPC11,ANAPC13,ANAPC5,ATF3,BHLHE40,BMPR2,CACNA1A,CACNA1C,Calm1 (includes others),CAPNS1,CCND2,CCND3,CDC16,CDC26,CDK4,CDKN1A,CEBPB,CHP1,DLD,EIF4E,EIF4EBP1,ELF1,ELK3,EP300,EP400,GADD45B,GADD45G,HBP1,HRAS,JUN,KAT2B,MAP2K1,MAP2K2,MAP2K3,MAPK3,MAPKAPK2,MCU,NFAT5,NFATC3,PDHA1,PHF1,PIK3C2A,PIK3R2,PPP1CA,PPP2CA,PPP3CB,PPP3R1,PTEN,RAF1,RALB,RAP1A,RAP1B,RNF2,RRAS,RRAS2,SERPINE1,SMAD3,…				Senescence Pathway	14.5	0.361	-5.051	ACVR1,ACVR2A,AKT1,AKT2,AKT3,ANAPC1,ANAPC10,ANAPC11,ANAPC13,ANAPC4,ANAPC5,ARAF,ASXL1,ASXL2,BMPR2,BRAF,CACNA1A,CACNA2D1,Calm1 (includes others),CAPN7,CAPNS1,CAT,CCND2,CDC26,CDK4,CDKN1A,CDKN1B,CEBPB,CHUK,CREBBP,DLAT,DLD,DMTF1,EIF4E,EIF4EBP1,ELF1,ELF2,ELF4,ELK3,EP300,EP400,ETS1,ETS2,EZH2,GADD45A,GADD45B,GADD45G,HIPK2,ING1,ITPR2,ITSN2,KAT2B,KRAS,MAP2K1,MAP2K3,MAP2K4,MAP2K5,MAPK1,MAPK14,MAPK6,MAPKAPK2,…
16	Integrin Signaling	14.1	0.387	4.714	ABL1,ACTA2,ACTB,ACTG1,ACTN1,ACTN4,ACTR3,AKT3,ARF4,ARF5,ARHGAP5,ARPC1B,ARPC2,ARPC5,ASAP1,BRAF,CAPN2,CAPN7,CAPNS1,Cdc42,CRK,CRKL,CTTN,DOCK1,FNBP1,FYN,GRB2,GSK3B,GSN,ITGA1,ITGA5,ITGA9,ITGAV,ITGB1,ITGB5,ITGB8,LIMS1,MAP2K1,MAP2K4,MAPK1,MAPK3,MAPK8,MPRIP,MYL9,NCK1,NRAS,PAK2,PAK3,PARVA,PFN1,PIK3C2A,PIK3CA,PIK3R1,PIK3R2,PIKFYVE,PPP1CB,Ppp1r12b,PTK2,PXN,RALB,RAP1B,RAP2A,RAP2B,RAPGEF1,RHOA,RHOB,RHOC,RHOJ,R…			Integrin Signaling	16.3	0.325	4.572	ABL1,ACTA2,ACTG1,ACTN1,ACTN4,ACTR2,ACTR3,AKT1,AKT2,AKT3,ARF3,ARF4,ARF5,ARHGAP5,ARPC1B,ARPC2,ARPC3,ARPC4,ARPC5,ARPC5L,ASAP1,CAPNS1,CAV1,CRK,GSK3B,GSN,HRAS,ILK,ILKAP,ITGA8,ITGAV,ITGB1,ITGB5,MAP2K1,MAP2K2,MAPK3,MYL12A,MYL12B,MYL9,NCK1,PAK3,PFN1,PFN2,PIK3C2A,PIK3R2,PPP1CB,PTEN,PTK2,PXN,RAF1,RALB,RAP1A,RAP1B,RHOA,RHOBTB1,RHOC,RHOJ,RHOQ,RND3,ROCK1,RRAS,RRAS2,SHC1,TSPAN3,TSPAN4,TSPAN6,VASP,Wasl,ZYX				Integrin Signaling	14.5	0.401	-3.623	ABL1,ACTA2,ACTG1,ACTN1,ACTN4,ACTR3,AKT1,AKT2,AKT3,ARF1,Arf2,ARF3,ARF4,ARHGAP5,ARPC1B,ARPC2,ARPC4,ARPC5,ASAP1,BRAF,CAPN7,CAPNS1,CRK,CRKL,CTTN,DOCK1,FNBP1,GRB2,GSK3B,GSN,ITGA1,ITGA9,ITGAV,ITGB1,ITGB5,ITGB8,KRAS,LIMS1,MAP2K1,MAP2K4,MAPK1,MAPK8,MPRIP,MYL9,NCK1,NEDD9,NRAS,PAK2,PAK3,PARVA,PFN1,PFN2,PIK3C2A,PIK3CA,PIKFYVE,PPP1CB,PPP1R12A,Ppp1r12b,PTK2,PXN,RAC1,RALA,RALB,RAP1A,RAP1B,RAP2A,RAP2B,RHOB,RHOJ…
17	PTEN Regulation	14	0.433	2.92	AGO2,AGO3,AKT3,ATN1,CBX4,CBX6,CHD3,CHD4,CSNK2A1,CSNK2A2,EGR1,EZH2,GATAD2A,GATAD2B,HDAC1,HDAC3,HDAC5,HDAC7,JUN,KDM1A,LAMTOR1,MAPK1,MAPK3,MECOM,MKRN1,MTA3,PHC2,PHC3,PREX2,PSMA6,PSMB4,PSMB7,PSMC1,PSMC3,PSMD1,PSMD11,PSMD12,PSMD13,PSMD2,PSMD3,PSMD4,PSMD7,PSMD8,PSME2,PSME4,RBBP7,RCOR1,REST,RNF146,RNF2,RRAGC,SCMH1,SEM1,SLC38A9,SUZ12,TNKS,TNKS2,TNRC6A,TNRC6B,TNRC6C,TP53,UBC,USP7,VAPA,XIAP			PTEN Regulation	28	0.473	4.817	AGO2,AKT1,AKT2,AKT3,ATF2,CBX6,CHD3,CSNK2A1,CSNK2B,EGR1,HDAC2,JUN,LAMTOR1,LAMTOR2,LAMTOR3,LAMTOR4,LAMTOR5,MAF1,MAPK3,MBD3,MKRN1,MTA1,PREX2,PSMA1,PSMA2,PSMA3,PSMA5,PSMA6,PSMA7,PSMB1,PSMB2,PSMB3,PSMB4,PSMB5,PSMB6,PSMB7,PSMC1,PSMC2,PSMC4,PSMC5,PSMC6,PSMD12,PSMD13,PSMD3,PSMD4,PSMD6,PSMD7,PSMD8,PSMD9,PSME2,PSME4,PTEN,RBBP4,RBBP7,RHEB,RNF146,RNF2,RPS27A,RRAGA,RRAGC,SCMH1,STUB1,SUZ12,TNKS,TNRC6C,TP53,UBC…				PTEN Regulation	13.7	0.44	-2.03	AGO2,AGO3,AKT1,AKT2,AKT3,ATF2,CBX4,CBX6,CHD3,CHD4,CSNK2A1,CSNK2A2,EZH2,GATAD2A,GATAD2B,HDAC1,HDAC3,HDAC5,HDAC7,KDM1A,LAMTOR1,LAMTOR3,LAMTOR4,MAPK1,MECOM,MTA3,PHC2,PHC3,PSMA1,PSMA7,PSMB10,PSMB4,PSMB7,PSMB8,PSMC3,PSMC6,PSMD1,PSMD11,PSMD12,PSMD2,PSMD3,PSMD4,PSMD6,PSMD9,PSME1,PSME4,RBBP7,RCOR1,REST,RNF146,RNF2,RRAGC,SCMH1,SEM1,SLC38A9,STUB1,SUZ12,TNKS,TNKS2,TNRC6B,TNRC6C,TP53,UBC,USP7,VAPA,XIAP
18	IL-8 Signaling	13.8	0.386	3.679	AKT3,ANGPT2,BCL2,BCL2L1,BRAF,CCND2,CCND3,Cdc42,CHUK,CSTB,EGFR,EIF4EBP1,FLT1,FNBP1,FOS,GNA12,GNAI2,GNAI3,GNAO1,GNAQ,GNB4,GNG10,GNG11,GNG12,GNG5,HMOX1,ICAM1,IQGAP1,IRAK1,IRAK3,ITGAV,JUN,LASP1,MAP2K1,MAP2K4,MAP4K4,MAPK1,MAPK3,MAPK8,MAPK9,MMP2,MYL9,NFKB1,NFKBIA,NFKBIB,NOX4,NRAS,PAK2,PIK3C2A,PIK3CA,PIK3R1,PIK3R2,PLD1,PLD3,PRKCA,PRKCE,PRKCI,PRKD1,PRKD3,PTGS2,PTK2,RAB11FIP2,RALB,RAP1B,RAP2A,RAP2B,RHOA,R…			IL-8 Signaling	8.12	0.252	3.175	AKT1,AKT2,AKT3,ANGPT2,BAX,BCL2L1,CCND2,CCND3,CSTB,EIF4EBP1,FLT1,FOS,GNA13,GNAS,GNB1,GNB2,GNB4,GNG10,GNG5,HBEGF,HRAS,IRAK1,ITGAV,JUN,MAP2K1,MAP2K2,MAPK3,MMP2,MYL12B,MYL9,NOX4,PIK3C2A,PIK3R2,PRKCA,PTK2,RAF1,RALB,RAP1A,RAP1B,RHOA,RHOBTB1,RHOC,RHOJ,RHOQ,RND3,ROCK1,ROCK2,RPS6KB1,RRAS,RRAS2,VASP,VEGFB,VEGFD				IL-8 Signaling	11.4	0.371	-4.303	AKT1,AKT2,AKT3,ANGPT1,ANGPT2,ARAF,BCL2,BRAF,CCND2,CHUK,CSTB,EGFR,EIF4EBP1,FLT1,FNBP1,FOS,GNA11,GNA12,GNA13,GNAI1,GNAI2,GNAI3,GNAO1,GNAQ,GNAS,GNB4,GNG11,GNG12,GNG5,HBEGF,HMOX1,ICAM1,IQGAP1,IRAK1,IRAK3,ITGAV,KRAS,LASP1,MAP2K1,MAP2K4,MAP4K4,MAPK1,MAPK8,MMP2,MYL9,NFKB1,NRAS,PAK2,PIK3C2A,PIK3CA,PRKCA,PRKCE,PRKCI,PTK2,RAB11FIP2,RAC1,RALA,RALB,RAP1A,RAP1B,RAP2A,RAP2B,RELA,RHOB,RHOJ,RHOQ,RHOT1,RHOU,RND3,…
19	Acute Phase Response Signaling	13.1	0.395	3.873	AHSG,AKT3,C1R,C1S,C2,C3,C4A/C4B,CFB,CHUK,CP,FN1,FOS,FTL,GRB2,HMOX1,HMOX2,HNRNPK,IL1R1,IL1RAP,IL33,IL6,IL6R,IL6ST,IRAK1,ITIH2,JAK2,JUN,LBP,MAP2K1,MAP2K4,MAP3K14,MAP3K5,MAPK1,MAPK14,MAPK3,MAPK8,MAPK9,MYD88,NFKB1,NFKB2,NFKBIA,NFKBIB,NR3C1,NRAS,OSMR,PDPK1,PIK3CA,PIK3R1,PIK3R2,PTPN11,RALB,RAP1B,RAP2A,RAP2B,RBP1,RBP4,RELB,RRAS2,SERPINA3,SERPINE1,SERPING1,SHC1,SOCS1,SOCS2,SOCS3,SOCS4,SOCS5,SOD2,SOS2,STA…			Acute Phase Response Signaling	6.93	0.249	2.795	AKT1,AKT2,AKT3,C1S,C2,C4A/C4B,CEBPB,CFB,FN1,FOS,FTL,HMOX2,HNRNPK,HRAS,IL1R1,IL33,IL6ST,IRAK1,ITIH2,JUN,LBP,MAP2K1,MAP2K2,MAP2K3,MAPK3,NR3C1,OSMR,PIK3R2,PTPN11,RAF1,RALB,RAP1A,RAP1B,RBP1,RBP4,RRAS,RRAS2,SERPINA3,SERPINE1,SERPING1,SHC1,SOCS2,SOD2,TCF4,TNFRSF11B,TNFRSF1A				Acute Phase Response Signaling	7.61	0.341	-2.774	AKT1,AKT2,AKT3,C1R,C2,C3,C4A/C4B,CEBPB,CFB,CHUK,FOS,GRB2,HMOX1,HMOX2,IL1R1,IL1RAP,IL33,IL6R,IL6ST,IRAK1,JAK2,KRAS,LBP,MAP2K1,MAP2K3,MAP2K4,MAP3K14,MAP3K5,MAPK1,MAPK14,MAPK8,NFKB1,NFKB2,NR3C1,NRAS,OSMR,PDPK1,PIK3CA,PTPN11,RALA,RALB,RAP1A,RAP1B,RAP2A,RAP2B,RBP4,REL,RELA,RELB,RRAS2,SERPINA3,SERPINE1,SERPING1,SHC1,SOCS4,SOCS5,SOS1,SOS2,STAT3,TCF3,TCF4,TF,TNFRSF1A
20	Oxytocin Signaling Pathway	12.7	0.344	4.899	ABCC9,AKT3,ATP2B1,ATP2B4,CACNA1A,CACNA1C,Calm1 (includes others),CAMKK2,CHP1,CREB1,CREB3,CREB3L2,CREB5,CREBBP,EEF2,EGFR,FOS,GJA1,GNA12,GNAI2,GNAI3,GNAO1,GNAQ,GNB4,GNG10,GNG11,GNG12,GNG5,GRB2,GSK3B,GUCY1A1,GUCY1A2,GUCY1B1,HSPB1,HSPB7,IL6,ITPR2,KCNT2,MAP2K4,MAP2K5,MAPK1,MAPK14,MAPK3,MAPK6,MAPK8,MAPK9,MPRIP,MYH11,MYH9,MYL6,MYL9,MYO10,MYO18A,NFATC1,NFE2L2,NFKB1,NFKB2,NPR1,NPR2,NPR3,NRAS,NT5C,PIK3C2A,…			Oxytocin Signaling Pathway	7.31	0.223	3.098	ABCC9,AKT1,AKT2,AKT3,ATF2,ATP2B1,CACNA1A,CACNA1C,Calm1 (includes others),CAMKK2,CHP1,CREB3L1,CREB3L2,CREB5,FOS,GNA13,GNB1,GNB2,GNB4,GNG10,GNG5,GSK3B,GUCY1A1,HRAS,HSPB1,HSPB2,HSPB7,ITPR1,KCNJ8,KCNT2,LPL,MAPK3,MEF2C,MYH11,MYH9,MYL6,MYL9,NPR2,NT5C,PIK3C2A,PIK3R2,PLA2G12A,PLA2G4A,PLCB4,PNPLA2,PPP1CB,PPP1R14A,PPP3CB,PPP3R1,PRKAR1A,PRKCA,PTGFR,RAF1,RALB,RAP1A,RAP1B,RHOA,ROCK1,ROCK2,RRAS,RRAS2,SHC1,SLC3…				Oxytocin Signaling Pathway	12	0.348	-5.027	AKT1,AKT2,AKT3,ARRB1,ATF2,ATF4,ATP2B1,ATP2B4,CACNA1A,CACNA2D1,Calm1 (includes others),CAMKK2,CREB1,CREB3,CREB3L1,CREB3L2,CREB5,CREBBP,EEF2,EGFR,FOS,GNA11,GNA12,GNA13,GNAI1,GNAI2,GNAI3,GNAO1,GNAQ,GNB4,GNG11,GNG12,GNG5,GRB2,GSK3B,GUCY1A1,GUCY1A2,ITPR1,ITPR2,KCNJ8,KRAS,LPL,MAP2K4,MAP2K5,MAPK1,MAPK14,MAPK6,MAPK8,MEF2C,MFN2,MPRIP,MYH10,MYH11,MYH9,MYL9,MYO10,MYO18A,NFATC1,NFE2L2,NFKB1,NFKB2,NPR2,NRAS,P…
21	Intra-Golgi and retrograde Golgi-to-ER traffic	12.7	0.379	3.761	ACTR10,AGPAT3,ARCN1,ARF4,ARF5,ARFGAP1,ARFGAP3,BET1L,CAPZA1,CAPZA2,CAPZB,COG5,COPA,COPB1,COPB2,COPE,COPZ1,COPZ2,CYTH3,DCTN2,DCTN4,DYNC1H1,DYNC1LI2,DYNLL1,GALNT1,GALNT2,GBF1,GCC2,GOLGA4,GOLGA5,GOLIM4,KDELR1,KIF13B,KIF16B,KIF1B,KIF1C,KIFAP3,KLC1,MAN1A1,MAN1A2,MAN1C1,MAN2A1,MAN2A2,NAA35,NAPA,NBAS,NSF,PAFAH1B1,PLIN3,RAB18,RAB1B,RAB30,RAB33B,RAB3GAP1,RAB3GAP2,RAB43,RAB6B,RAB9A,RHOBTB3,STX16,STX18,STX5,…			Intra-Golgi and retrograde Golgi-to-ER traffic	7.33	0.246	5.657	ACTR10,ACTR1A,AGPAT3,ARF3,ARF4,ARF5,ARFGAP2,ARFIP2,ARL1,CAPZA1,CAPZA2,COPE,CYTH2,DCTN1,DCTN2,DCTN3,DCTN6,DYNC1H1,GOLIM4,KDELR2,KIF1B,KIF1C,KIF2A,KIF5B,MAN1A1,MAN1C1,MAN2A1,NAA38,NAPA,PAFAH1B2,PLA2G4A,PLIN3,RAB18,RAB1A,RAB1B,RAB6A,RAB9A,RHOBTB3,SCOC,TMED2,TMED3,TMED7,TMF1,TUBA1B,TUBA1C,TUBB2A,TUBB2B,TUBB4B,VAMP4,VPS54				Intra-Golgi and retrograde Golgi-to-ER traffic	17.5	0.433	-4.904	ACTR10,AGPAT3,ARCN1,ARF1,ARF3,ARF4,ARFGAP3,ARFIP2,ARL1,BET1L,BICD1,BICD2,CAPZA1,CAPZB,COG5,COPA,COPB1,COPB2,COPG1,COPZ1,COPZ2,DCTN2,DCTN4,DCTN6,DYNC1LI2,DYNLL1,DYNLL2,GALNT1,GALNT2,GBF1,GCC1,GCC2,GOLGA4,GOLGA5,GOLIM4,GOSR2,IGF2R,KDELR1,KDELR2,KDELR3,KIF13B,KIF16B,KIF1B,KIF1C,KIF2A,KIF5B,KIFAP3,KLC1,M6PR,MAN1A1,MAN1A2,MAN1C1,MAN2A2,NAA35,NBAS,NSF,PAFAH1B1,PLIN3,RAB18,RAB1B,RAB30,RAB33B,RAB3GAP1,RA…
22	ID1 Signaling Pathway	12.5	0.378	3.671	ABI1,ACVR2A,AKT3,APP,ATF3,ATF6,BCL2,BCL2L1,BCL3,BHLHE40,BMP4,BMPR1A,BMPR2,BRAF,CCN2,CDKN1A,CDKN1B,CREBBP,CUL3,EGFR,EGR1,EP300,FGF2,FGFR1,FGFR2,FN1,FOXO3,FYN,GSK3B,GSPT1,HIF1A,IGF1R,IL6,IL6R,LIFR,MAPK1,MAPK14,MAPK3,MMP2,MYC,NFKB1,NFKB2,NRAS,PARK7,PIK3C2A,PIK3CA,PIK3R1,PIK3R2,PLXNB2,PTGER4,RALB,RAP1B,RAP2A,RAP2B,REST,RHOC,RRAS2,SMAD1,SMAD3,SMAD4,SMAD5,STAT3,TGFB2,TGFBR2,TGFBR3,TNFRSF1A,TP53,USP1,VE…			ID1 Signaling Pathway	9.8	0.274	2.832	ACVR1,AKT1,AKT2,AKT3,APP,ATF3,ATF6,BAX,BCL2L1,BHLHE40,BMPR1A,BMPR2,CAV1,CCN2,CDK4,CDKN1A,CTNNB1,CUL3,EGR1,EP300,FGFR1,FGFR2,FGFRL1,FN1,GSK3B,GSPT1,HIF1A,HRAS,MAPK3,MMP2,PIK3C2A,PIK3R2,PLXNB2,PTEN,RAF1,RALB,RAP1A,RAP1B,RHOC,RRAS,RRAS2,SMAD3,SMAD4,TGFB1,TGFB2,TGFB3,TGFBR1,TGFBR3,TNFRSF11B,TNFRSF1A,TP53,USP1,VEGFB,VEGFD,ZNF148				ID1 Signaling Pathway	11.1	0.373	-3.349	ABI1,ACVR1,ACVR2A,ACVRL1,AKT1,AKT2,AKT3,APP,ARAF,ATF6,BCL2,BCL3,Bhlhe41,BMP4,BMPR1A,BMPR2,BRAF,CCN2,CDK4,CDKN1A,CDKN1B,CREBBP,CTNNB1,CUL3,EGFR,EP300,ETS1,FGF2,FGFR1,FGFR2,FGFRL1,GSK3B,GSPT1,HIF1A,IGF1R,IL6R,KRAS,LIFR,MAPK1,MAPK14,MMP2,NFKB1,NFKB2,NRAS,PARK7,PIK3C2A,PIK3CA,PLXNB2,RALA,RALB,RAP1A,RAP1B,RAP2A,RAP2B,REST,RRAS2,SMAD1,SMAD3,SMAD4,SMAD5,STAT3,TGFB2,TGFB3,TGFBR2,TGM2,TNFRSF1A,TP53,USP1,V…
23	HGF Signaling	12.3	0.432	4.718	AKT3,CDKN1A,CRKL,DOCK1,ELF1,ELF2,ELF4,ELK3,ETS2,FOS,GAB1,GRB2,IL6,ITGA1,ITGA5,ITGA9,ITGAV,ITGB1,ITGB5,ITGB8,JUN,MAP2K1,MAP2K4,MAP3K14,MAP3K2,MAP3K3,MAP3K4,MAP3K5,MAP3K6,Map3k7,MAP3K8,MAPK1,MAPK3,MAPK8,MAPK9,NRAS,PIK3C2A,PIK3CA,PIK3R1,PIK3R2,PRKCA,PRKCE,PRKCI,PRKD1,PRKD3,PTGS2,PTK2,PTPN11,PXN,RALB,RAP1B,RAP2A,RAP2B,RAPGEF1,RRAS2,SOS2,STAT3			HGF Signaling	4.37	0.235	3.53	AKT1,AKT2,AKT3,ATF2,CDKN1A,ELF1,ELK3,FOS,HRAS,ITGA8,ITGAV,ITGB1,ITGB5,JUN,MAP2K1,MAP2K2,MAP3K2,Map3k7,MAPK3,PIK3C2A,PIK3R2,PRKCA,PTK2,PTPN11,PXN,RAF1,RALB,RAP1A,RAP1B,RRAS,RRAS2				HGF Signaling	9.88	0.409	-3.507	AKT1,AKT2,AKT3,ATF2,CDKN1A,CRKL,DOCK1,ELF1,ELF2,ELF4,ELK3,ETS1,ETS2,FOS,GAB1,GRB2,ITGA1,ITGA9,ITGAV,ITGB1,ITGB5,ITGB8,KRAS,MAP2K1,MAP2K4,MAP3K14,MAP3K2,MAP3K3,MAP3K4,MAP3K5,MAP3K6,Map3k7,MAPK1,MAPK8,NRAS,PIK3C2A,PIK3CA,PRKCA,PRKCE,PRKCI,PTK2,PTPN11,PXN,RAC1,RALA,RALB,RAP1A,RAP1B,RAP2A,RAP2B,RRAS2,SOS1,SOS2,STAT3
24	Transcriptional regulation by RUNX1	12	0.408	3.775	ABL1,ARID1B,ARID2,AUTS2,AXIN1,CBFB,CBX4,CBX6,CCNH,CDK7,CREBBP,CSNK2A1,CSNK2A2,CTSK,CTSV,ELF1,ELF2,EP300,ESR1,HIPK2,ITCH,KMT2A,LDB1,LIFR,MNAT1,PBRM1,PCGF5,PHC2,PHC3,PSMA6,PSMB4,PSMB7,PSMC1,PSMC3,PSMD1,PSMD11,PSMD12,PSMD13,PSMD2,PSMD3,PSMD4,PSMD7,PSMD8,PSME2,PSME4,RNF2,RSPO3,RUNX1,RYBP,SCMH1,SEM1,SMARCA2,SMARCA4,SMARCC1,SMARCC2,SMARCE1,SOCS3,SOCS4,TCF12,TCF3,UBC,YAP1			Transcriptional regulation by RUNX1	12.2	0.329	5.774	ABL1,ACTL6A,ARID2,AUTS2,CBFB,CBX6,CCNH,CSNK2A1,CSNK2B,CTSK,CTSV,ELF1,EP300,ESR1,LMO2,PBRM1,PSMA1,PSMA2,PSMA3,PSMA5,PSMA6,PSMA7,PSMB1,PSMB2,PSMB3,PSMB4,PSMB5,PSMB6,PSMB7,PSMC1,PSMC2,PSMC4,PSMC5,PSMC6,PSMD12,PSMD13,PSMD3,PSMD4,PSMD6,PSMD7,PSMD8,PSMD9,PSME2,PSME4,RNF2,RPS27A,RYBP,SCMH1,SMARCD2,UBC				Transcriptional regulation by RUNX1	11.7	0.414	-3.873	ABL1,ACTL6A,ARID1A,ARID1B,ARID2,AUTS2,CBFB,CBX4,CBX6,CCNH,CREBBP,CSNK2A1,CSNK2A2,CTSK,ELF1,ELF2,EP300,ESR1,HIPK2,ITCH,KMT2A,LDB1,LIFR,MNAT1,PBRM1,PCGF5,PHC2,PHC3,PSMA1,PSMA7,PSMB10,PSMB4,PSMB7,PSMB8,PSMC3,PSMC6,PSMD1,PSMD11,PSMD12,PSMD2,PSMD3,PSMD4,PSMD6,PSMD9,PSME1,PSME4,RNF2,RUNX1,RYBP,SCMH1,SEM1,SMARCA2,SMARCA4,SMARCB1,SMARCC1,SMARCC2,SMARCE1,SOCS4,TCF12,TCF3,TJP1,UBC,YAP1
25	Ephrin Receptor Signaling	11.9	0.371	4.636	ABI1,ABL1,ACP1,ACTR3,ADAM10,AKT3,ARPC1B,ARPC2,ARPC5,AXIN1,CFL2,CREB1,CREB3,CREB3L2,CREB5,CREBBP,CRK,CRKL,CXCL12,EFNA5,EPHA3,FYN,GNA12,GNAI2,GNAI3,GNAO1,GNAQ,GNB4,GNG10,GNG11,GNG12,GNG5,GRB2,ITGA1,ITGA5,ITGA9,ITGAV,ITGB1,ITGB5,ITGB8,ITSN1,JAK2,KALRN,MAP2K1,MAP3K14,MAP4K4,MAPK1,MAPK3,NCK1,NRAS,PAK2,PAK3,PDGFD,PTK2,PTPN11,PXN,RALB,RAP1B,RAP2A,RAP2B,RAPGEF1,RASA1,RHOA,ROCK1,ROCK2,RRAS2,SHC1,SORBS1,SO…			Ephrin Receptor Signaling	10.7	0.282	5.397	ABL1,ACTR2,ACTR3,AKT1,AKT2,AKT3,ARPC1B,ARPC2,ARPC3,ARPC4,ARPC5,ARPC5L,ATF2,CFL1,CFL2,CREB3L1,CREB3L2,CREB5,CRK,GNA13,GNAS,GNB1,GNB2,GNB4,GNG10,GNG5,GRINA,HRAS,ITGA8,ITGAV,ITGB1,ITGB5,MAP2K1,MAP2K2,MAPK3,NCK1,PAK3,PDGFA,PDGFD,PTK2,PTPN11,PXN,RAF1,RALB,RAP1A,RAP1B,RASA1,RHOA,ROCK1,ROCK2,RRAS,RRAS2,SDCBP,SHC1,VEGFB,VEGFD,Wasl				Ephrin Receptor Signaling	16	0.421	-4.924	ABI1,ABL1,ACP1,ACTR3,ADAM10,AKT1,AKT2,AKT3,ANGPT1,ARPC1B,ARPC2,ARPC4,ARPC5,ATF2,ATF4,CFL1,CREB1,CREB3,CREB3L1,CREB3L2,CREB5,CREBBP,CRK,CRKL,CXCL12,EFNA5,EPHA7,GNA11,GNA12,GNA13,GNAI1,GNAI2,GNAI3,GNAO1,GNAQ,GNAS,GNB4,GNG11,GNG12,GNG5,GRB2,ITGA1,ITGA9,ITGAV,ITGB1,ITGB5,ITGB8,ITSN1,JAK2,KALRN,KRAS,MAP2K1,MAP3K14,MAP4K4,MAPK1,NCK1,NRAS,PAK2,PAK3,PDGFA,PDGFD,PTK2,PTPN11,PXN,RAC1,RALA,RALB,RAP1A,RAP1B,…
26	Signaling by VEGF	11.7	0.454	4.041	ABI1,ABI2,ACTB,ACTG1,AHCYL1,AKT3,AXL,CRK,CTNNA1,CTNND1,CYFIP1,DOCK1,ELMO1,ELMO2,FLT1,FYN,HSP90AA1,HSPB1,ITGAV,ITPR2,MAPK14,MAPKAP1,MAPKAPK2,NCK1,NCKAP1,NRAS,NRP1,PAK2,PAK3,PDPK1,PIK3CA,PIK3R1,PIK3R2,PRKACB,PRKCA,PTK2,PXN,RASA1,RHOA,RICTOR,ROCK1,ROCK2,SHC2,SPHK1,VEGFA,VEGFB,VEGFC,VEGFD,WASF2			Signaling by VEGF	7.97	0.315	2.959	ACTG1,AHCYL1,AKT1,AKT2,AKT3,AXL,BAIAP2,BRK1,CAV1,CRK,CTNNB1,CTNND1,CYBA,FLT1,HRAS,HSP90AA1,HSPB1,ITGAV,ITPR1,MAPKAPK2,NCK1,NCKAP1,NRP1,PAK3,PIK3R2,PRKCA,PTK2,PXN,RASA1,RHOA,ROCK1,ROCK2,VEGFB,VEGFD				Signaling by VEGF	11	0.454	-4.522	ABI1,ABI2,ACTG1,AHCYL1,AKT1,AKT2,AKT3,CRK,CTNNA1,CTNNB1,CTNND1,CYBA,DOCK1,ELMO1,ELMO2,FLT1,HSP90AA1,ITGAV,ITPR1,ITPR2,JUP,KRAS,MAPK14,MAPKAP1,MAPKAPK2,NCK1,NRAS,NRP1,PAK2,PAK3,PDPK1,PIK3CA,PRKACA,PRKACB,PRKCA,PTK2,PXN,RAC1,RASA1,RICTOR,ROCK1,ROCK2,SHC2,SPHK1,VAV3,VEGFB,VEGFC,VEGFD,WASF2
27	MSP-RON Signaling in Cancer Cells Pathway	11.6	0.414	3.371	ACTA2,AKT3,ARNT,BRAF,CREB1,CREB3,CREB3L2,CREB5,CREBBP,EGFR,ELF1,ELF2,ELF4,ELK3,ETS2,FOS,GRB2,GSK3B,HIF1A,IL3RA,ITGB1,JUN,MAP2K1,MAPK1,MAPK3,MYC,NFKB1,NFKB2,NFKBIA,NRAS,PIK3C2A,PIK3CA,PIK3R1,PIK3R2,PTK2,RALB,RAP1B,RAP2A,RAP2B,RELB,RPS6KA3,RRAS2,SOS2,SP1,STAT3,TCF3,TCF4,TCF7L1,TCF7L2,TRIM24,VEGFA,VEGFB,VEGFC,VEGFD,VIM,YWHAB,YWHAE,YWHAG			MSP-RON Signaling in Cancer Cells Pathway	5.95	0.257	3.087	ACTA2,AKT1,AKT2,AKT3,ATF2,CREB3L1,CREB3L2,CREB5,CTNNB1,ELF1,ELK3,FOS,GSK3B,HIF1A,HRAS,ITGB1,JUN,MAP2K1,MAP2K2,MAPK3,PIK3C2A,PIK3R2,PTK2,RAF1,RALB,RAP1A,RAP1B,RRAS,RRAS2,TCF4,VEGFB,VEGFD,YWHAE,YWHAH,YWHAQ,YWHAZ				MSP-RON Signaling in Cancer Cells Pathway	14.9	0.464	-3.775	ACTA2,AKT1,AKT2,AKT3,ARAF,ARNT,ATF2,ATF4,BRAF,CREB1,CREB3,CREB3L1,CREB3L2,CREB5,CREBBP,CTNNB1,EGFR,ELF1,ELF2,ELF4,ELK3,ETS1,ETS2,FOS,GRB2,GSK3B,HIF1A,IL3RA,ITGB1,KRAS,MAP2K1,MAPK1,NFKB1,NFKB2,NRAS,PIK3C2A,PIK3CA,PTK2,RALA,RALB,RAP1A,RAP1B,RAP2A,RAP2B,REL,RELA,RELB,RRAS2,SOS1,SOS2,SP1,STAT3,TCF3,TCF4,TCF7L1,TCF7L2,TRIM24,VEGFB,VEGFC,VEGFD,VIM,YWHAB,YWHAE,YWHAG,YWHAQ
28	Human Embryonic Stem Cell Pluripotency	11.5	0.368	3.952	ACVR2A,AKT3,APC,AXIN1,BMP4,BMPR1A,BMPR2,BRAF,FGF2,FGFR1,FGFR2,FOXO1,FZD1,FZD2,FZD4,GRB2,GSK3B,HSP90AA1,HSP90AB1,HSP90B1,ID2,ID3,INHBA,JAK1,JAK2,KLF2,KLF4,LIFR,MAP2K1,MAP2K4,MAP2K5,MAPK1,MYC,NFYB,NFYC,NGF,NRAS,NTF3,NTRK2,NTRK3,PDGFD,PDGFRA,PDGFRB,PDPK1,PIK3C2A,PIK3CA,PIK3R1,PIK3R2,PRKCA,PRKCE,PRKCI,PRKD1,PRKD3,RALB,RAP1B,RAP2A,RAP2B,REST,RIF1,RRAS2,S1PR2,SMAD1,SMAD3,SMAD4,SMAD5,SMAD7,SMO,SOS2,SPHK…			Human Embryonic Stem Cell Pluripotency	6.63	0.239	2.887	ACVR1,AKT1,AKT2,AKT3,APC,BMP1,BMPR1A,BMPR2,CTNNB1,FGFR1,FGFR2,FGFRL1,FZD2,FZD4,GSK3B,HRAS,HSP90AA1,HSP90AB1,HSP90B1,ID3,ID4,KLF2,KLF4,LEFTY1,MAP2K1,MAP2K2,MAP2K3,NTF3,PDGFA,PDGFD,PDGFRA,PIK3C2A,PIK3R2,PRKCA,RAF1,RALB,RAP1A,RAP1B,RRAS,RRAS2,SMAD3,SMAD4,SMAD7,TGFB1,TGFB2,TGFB3,TGFBR1,WNT5A				Human Embryonic Stem Cell Pluripotency	12	0.383	-4.444	ACVR1,ACVR2A,ACVRL1,AKT1,AKT2,AKT3,APC,ARAF,BMP4,BMPR1A,BMPR2,BRAF,CTNNB1,FGF2,FGFR1,FGFR2,FGFRL1,FZD2,FZD4,FZD7,GRB2,GSK3B,HSP90AA1,HSP90AB1,HSP90B1,ID3,INHBA,JAK1,JAK2,KLF4,KRAS,LIFR,MAP2K1,MAP2K3,MAP2K4,MAP2K5,MAPK1,NFYB,NFYC,NGF,NRAS,NTRK2,PDGFA,PDGFD,PDGFRB,PDPK1,PIK3C2A,PIK3CA,PRKCA,PRKCE,PRKCI,RALA,RALB,RAP1A,RAP1B,RAP2A,RAP2B,REST,RIF1,RRAS2,S1PR2,SMAD1,SMAD3,SMAD4,SMAD5,SMAD7,SMO,SOS1,SO…
29	Role of Tissue Factor in Cancer	11.3	0.362	3.811	ACVR2A,AKT3,BCL2,BCL2L1,BMPR2,BRAF,CCN2,CFL2,CHUK,CSF1,EGFR,EGR1,F3,FLT1,FOS,FYN,GNA12,GNAQ,ITGAV,ITGB1,JAK2,JUN,MAP2K1,MAP2K4,MAP2K5,MAPK1,MAPK14,MAPK3,MAPK6,MAPK8,MAPK9,MMP2,NFKB1,NFKB2,NRAS,P4HB,PDIA6,PIK3C2A,PIK3CA,PIK3R1,PIK3R2,PLCB1,PPP2CA,PPP2CB,PPP2R2A,PPP2R2D,PPP2R3A,PPP2R5A,Ppp2r5c,PPP2R5E,PRKCA,PTGS2,PTK2,PTPN11,PXN,RALB,RAP1B,RAP2A,RAP2B,RB1,RBL2,RPS6KA3,RPS6KB1,RRAS2,STAT5B,TFPI,TGFB…			Role of Tissue Factor in Cancer	8.81	0.261	3.538	ACVR1,AKT1,AKT2,AKT3,BCL2L1,BMPR2,CCN1,CCN2,CFL1,CFL2,CSF1,EGR1,EIF4E,F2R,F3,FLT1,FOS,GNA13,HBEGF,HRAS,ITGAV,ITGB1,JUN,MAP2K1,MAP2K2,MAP2K3,MAPK3,MMP2,PDIA6,PIK3C2A,PIK3R2,PPP2CA,Ppp2r5c,PRKCA,PTEN,PTK2,PTPN11,PXN,RAF1,RALB,RAP1A,RAP1B,RPS6KB1,RRAS,RRAS2,TFPI,TGFB1,TGFB2,TGFB3,TGFBR1,TGFBR3,TNFRSF11B,TNFRSF1A,TP53				Role of Tissue Factor in Cancer	13.2	0.391	-3.444	ACVR1,ACVR2A,AKT1,AKT2,AKT3,ARAF,ARRB1,BCL2,BMPR2,BRAF,CCN2,CFL1,CHUK,CSF1,EGFR,EIF4E,F2R,F3,FLT1,FOS,GNA11,GNA12,GNA13,GNAQ,HBEGF,ITGAV,ITGB1,JAK2,KRAS,MAP2K1,MAP2K3,MAP2K4,MAP2K5,MAPK1,MAPK14,MAPK6,MAPK8,MMP2,NFKB1,NFKB2,NRAS,P4HB,PDIA6,PIK3C2A,PIK3CA,PLCB1,PPP2CA,PPP2CB,PPP2R1A,PPP2R2A,PPP2R2D,PPP2R3A,Ppp2r3d,PPP2R5A,Ppp2r5c,PPP2R5E,PRKCA,PTK2,PTPA,PTPN11,PXN,RAC1,RALA,RALB,RAP1A,RAP1B,RAP2A,R…
30	JAK/STAT Signaling	10.9	0.488	3.042	AKT3,BCL2L1,CDKN1A,FOS,GNAQ,GRB2,IL6,JAK1,JAK2,JUN,MAP2K1,MAPK1,MAPK3,NFKB1,NFKB2,NRAS,PIAS1,PIAS2,PIK3C2A,PIK3CA,PIK3R1,PIK3R2,PTPN1,PTPN11,RALB,RAP1B,RAP2A,RAP2B,RELB,RRAS2,SHC1,SOCS1,SOCS2,SOCS3,SOCS4,SOCS5,SOS2,STAT3,STAT5B,STAT6			JAK/STAT Signaling	5.2	0.293	2.858	AKT1,AKT2,AKT3,BCL2L1,CDKN1A,CEBPB,FOS,HRAS,JUN,MAP2K1,MAP2K2,MAPK3,PIK3C2A,PIK3R2,PTPN11,RAF1,RALB,RAP1A,RAP1B,RRAS,RRAS2,SHC1,SOCS2,STAT6				JAK/STAT Signaling	10.3	0.488	-2.596	AKT1,AKT2,AKT3,CDKN1A,CEBPB,FOS,GNAQ,GRB2,JAK1,JAK2,KRAS,MAP2K1,MAPK1,NFKB1,NFKB2,NRAS,PIAS2,PIK3C2A,PIK3CA,PTPN1,PTPN11,RALA,RALB,RAP1A,RAP1B,RAP2A,RAP2B,REL,RELA,RELB,RRAS2,SHC1,SOCS4,SOCS5,SOS1,SOS2,STAT2,STAT3,STAT5B,STAT6
31	VEGF Signaling	10.8	0.455	2	ACTA2,ACTB,ACTG1,ACTN1,ACTN4,AKT3,ARNT,BCL2,BCL2L1,EIF1AX,EIF2S1,EIF2S2,EIF2S3,ELAVL1,FLT1,FOXO1,FOXO3,GRB2,HIF1A,MAP2K1,MAPK1,MAPK3,NRAS,PIK3C2A,PIK3CA,PIK3R1,PIK3R2,PRKCA,PTK2,PTPN11,PXN,RALB,RAP1B,RAP2A,RAP2B,ROCK1,ROCK2,RRAS2,SHC1,SOS2,VEGFA,VEGFB,VEGFC,VEGFD,YWHAE			VEGF Signaling	10.4	0.364	2.828	ACTA2,ACTG1,ACTN1,ACTN4,AKT1,AKT2,AKT3,BAD,BCL2L1,EIF1AY,EIF2S1,ELAVL1,FLT1,HIF1A,HRAS,MAP2K1,MAP2K2,MAPK3,PIK3C2A,PIK3R2,PRKCA,PTK2,PTPN11,PXN,RAF1,RALB,RAP1A,RAP1B,ROCK1,ROCK2,RRAS,RRAS2,SHC1,VEGFB,VEGFD,YWHAE				VEGF Signaling	10.2	0.455	-3.124	ACTA2,ACTG1,ACTN1,ACTN4,AKT1,AKT2,AKT3,ARNT,BCL2,EIF1AX,EIF1AY,EIF2S1,EIF2S2,EIF2S3,ELAVL1,FLT1,GRB2,HIF1A,KRAS,MAP2K1,MAPK1,NRAS,PIK3C2A,PIK3CA,PRKCA,PTK2,PTPN11,PXN,RALA,RALB,RAP1A,RAP1B,RAP2A,RAP2B,ROCK1,ROCK2,RRAS2,SHC1,SOS1,SOS2,VCL,VEGFB,VEGFC,VEGFD,YWHAE
32	HIF1Œ± Signaling	10.6	0.354	4.096	ADM,AKT3,ARNT,BRAF,CAMK1D,CAMK2D,CDKN1A,CHP1,COPS5,CREBBP,EIF4EBP1,ELOC,EP300,FGF2,FLT1,HIF1A,HK2,HMOX1,HSP90AA1,HSPA1A/HSPA1B,Hspa1b,HSPA4,HSPA5,HSPA8,HSPA9,IGF1,IL6,IL6R,JUN,KDM1A,MAP2K1,MAP2K4,MAP2K5,MAPK1,MAPK3,MMP14,MMP19,MMP2,MMP23B,MMP3,NAA10,NCOA1,NOX4,NRAS,PIK3C2A,PIK3CA,PIK3R1,PIK3R2,PPP3CA,PPP3CB,PRKCA,PRKCE,PRKCI,PRKD1,PRKD3,RACK1,RALB,RAN,RAP1B,RAP2A,RAP2B,RPS6,RPS6KB1,RRAS2,SAT1,SER…			HIF1Œ± Signaling	8.65	0.258	3.434	ADM,AKT1,AKT2,AKT3,CAMK1D,CAMK2D,CDKN1A,CHP1,EGLN2,EIF4E,EIF4EBP1,ELOC,EP300,FLT1,GPI,HIF1A,HK2,HRAS,HSP90AA1,HSPA4,HSPA5,HSPA8,HSPA9,JUN,MAP2K1,MAP2K2,MAP2K3,MAPK3,MKNK2,MMP2,MMP23B,NOX4,PIK3C2A,PIK3R2,PPP3CB,PPP3R1,PRKCA,RAF1,RALB,RAN,RAP1A,RAP1B,RPS6,RPS6KB1,RRAS,RRAS2,SAT1,SERPINE1,STUB1,TGFB1,TGFB2,TP53,VEGFB,VEGFD				HIF1Œ± Signaling	10.6	0.364	-4.503	ADM,AKT1,AKT2,AKT3,ARAF,ARNT,BRAF,CAMK1,CAMK1D,CAMK2D,CDKN1A,COPS5,CREBBP,EIF4E,EIF4EBP1,EP300,FGF2,FLT1,HIF1A,HK1,HK2,HMOX1,HSP90AA1,HSPA14,HSPA2,HSPA4,HSPA5,HSPA9,IL6R,KDM1A,KRAS,LDHB,MAP2K1,MAP2K3,MAP2K4,MAP2K5,MAPK1,MKNK2,MMP14,MMP16,MMP19,MMP2,MMP23B,MMP3,NAA10,NCOA1,NRAS,PIK3C2A,PIK3CA,PPP3CA,PPP3CB,PRKCA,PRKCE,PRKCI,RAC1,RACK1,RALA,RALB,RAP1A,RAP1B,RAP2A,RAP2B,RPS6,RPS6KB1,RRAS2,SAT1,SERPI…
33	Cardiac Hypertrophy Signaling (Enhanced)	10.5	0.277	6.455	ACE,ACVR2A,ADCY5,AKAP13,AKT3,ATF6,BMPR2,CACNA1A,CACNA1C,Calm1 (includes others),CAMK2D,CHP1,CHUK,DIAPH1,Diaph2,DLG1,Eda,EDNRA,EIF4EBP1,EP300,FGF2,FGF7,FGFR1,FGFR2,FZD1,FZD2,FZD4,GDE1,GHR,GNA12,GNAI2,GNAI3,GNAQ,GNB4,GNG10,GNG11,GNG12,GNG5,GSK3B,GUCY1A1,GUCY1B1,HAND2,HDAC1,HDAC3,HDAC5,HDAC7,HDAC8,HDAC9,HSPB1,HSPB7,IFNAR1,IGF1,IGF1R,IL10RB,IL13RA1,IL17D,IL17RA,IL1R1,IL31RA,IL33,IL3RA,IL6,IL6R,IL6ST,…			Cardiac Hypertrophy Signaling (Enhanced)	6.31	0.183	5.33	ACVR1,ADCY7,AKT1,AKT2,AKT3,ATF2,ATF6,BMPR2,CACNA1A,CACNA1C,Calm1 (includes others),CAMK2D,CHP1,CTNNB1,EIF4E,EIF4EBP1,EP300,FGFR1,FGFR2,FGFRL1,FZD2,FZD4,GDE1,GHR,GNA13,GNAS,GNB1,GNB2,GNB4,GNG10,GNG5,GSK3B,GUCY1A1,HAND2,HDAC2,HRAS,HSPB1,HSPB2,HSPB7,IL11RA,IL13RA1,IL1R1,IL33,IL6ST,ITGA8,ITGAV,ITGB1,ITGB5,ITPR1,JUN,MAP2K1,MAP2K2,MAP2K3,MAP3K2,MAP3K20,Map3k7,MAPK3,MAPKAPK2,MEF2A,MEF2C,MKNK2,NFAT5,NFAT…				Cardiac Hypertrophy Signaling (Enhanced)	9.11	0.277	-7.66	ACVR1,ACVR2A,ADCY7,AKT1,AKT2,AKT3,ATF2,ATF6,ATP2A2,BMPR2,CACNA1A,CACNA2D1,Calm1 (includes others),CAMK2D,CHUK,CTNNB1,DIAPH1,Diaph2,DLG1,Eda,EIF4E,EIF4EBP1,EP300,FGF2,FGF7,FGFR1,FGFR2,FGFRL1,FZD2,FZD4,FZD7,GHR,GNA11,GNA12,GNA13,GNAI1,GNAI2,GNAI3,GNAQ,GNAS,GNB4,GNG11,GNG12,GNG5,GSK3B,GUCY1A1,HAND2,HDAC1,HDAC3,HDAC4,HDAC5,HDAC7,HDAC8,IFNAR1,IGF1R,IL10RB,IL11RA,IL13RA1,IL17RA,IL1R1,IL31RA,IL33,IL3RA,…
34	Pulmonary Healing Signaling Pathway	10.3	0.357	4.154	BMP4,BMPR1A,BMPR2,BRAF,CFL2,CXCL12,EGFR,EP300,FGF7,FGFR1,FGFR2,FYN,FZD1,FZD2,FZD4,GRB2,HIF1A,IDH2,MAP2K4,MAPK1,MAPK14,MAPK3,MAPK8,MAPK9,MMP14,MMP19,MMP2,MMP23B,MMP3,MYC,MYD88,NFATC1,NFKB1,NFKB2,NFKBIA,NRAS,PRKAG1,PRKAG2,PRKCA,PRKCE,PRKCI,PRKD1,PRKD3,RALB,RAP1B,RAP2A,RAP2B,RBPJ,RRAS2,SMAD1,SMAD5,SMO,SOS2,STAT3,STAT5B,TCF3,TCF4,TCF7L1,TCF7L2,TGFB2,THBS1,TLR4,TNFRSF1A,VEGFA,VEGFB,VEGFC,VEGFD,WNT9A,W…			Pulmonary Healing Signaling Pathway	2.37	0.176	3.888	ACKR3,BMPR1A,BMPR2,CFL1,CFL2,CTNNB1,EP300,FGFR1,FGFR2,FZD2,FZD4,HBEGF,HIF1A,HRAS,IDH2,MAPK3,MMP2,MMP23B,PRKCA,RAF1,RALB,RAP1A,RAP1B,RRAS,RRAS2,TCF4,TGFB1,TGFB2,TGFB3,TLR4,TNFRSF11B,TNFRSF1A,VEGFB,VEGFD,WNT5A				Pulmonary Healing Signaling Pathway	11.8	0.382	-5.506	ARAF,BMP4,BMPR1A,BMPR2,BRAF,CFL1,CTNNB1,CXCL12,EGFR,EP300,FGF7,FGFR1,FGFR2,FZD2,FZD4,FZD7,GRB2,HBEGF,HIF1A,IDH2,JAG1,KRAS,MAP2K4,MAPK1,MAPK14,MAPK8,MMP14,MMP16,MMP19,MMP2,MMP23B,MMP3,NFATC1,NFKB1,NFKB2,NOTCH2,NRAS,PRKAB2,PRKAG1,PRKAG2,PRKCA,PRKCE,PRKCI,RAC1,RALA,RALB,RAP1A,RAP1B,RAP2A,RAP2B,RBPJ,RRAS2,SMAD1,SMAD5,SMO,SOS1,SOS2,STAT3,STAT5B,TCF3,TCF4,TCF7L1,TCF7L2,TGFB2,TGFB3,THBS1,TLR4,TNFRSF1A,V…
35	CXCR4 Signaling	10.3	0.375	3.221	ADCY5,AKT3,ARHGEF11,Cdc42,CRK,CXCL12,DOCK1,EGR1,ELMO1,ELMO2,FNBP1,FOS,GNA12,GNAI2,GNAI3,GNAO1,GNAQ,GNB4,GNG10,GNG11,GNG12,GNG5,GUCY1A1,GUCY1B1,ITPR2,JUN,MAP2K1,MAP2K4,MAPK1,MAPK3,MAPK8,MAPK9,MYL6,MYL9,NRAS,PAK2,PAK3,PIK3C2A,PIK3CA,PIK3R1,PIK3R2,PLCB1,PLCB4,PRKCA,PRKCE,PRKCI,PRKD1,PRKD3,PTK2,PXN,RALB,RAP1B,RAP2A,RAP2B,RHOA,RHOB,RHOC,RHOJ,RHOQ,RHOT1,ROCK1,ROCK2,RRAS2			CXCR4 Signaling	8.32	0.274	2.53	ADCY7,AKT1,AKT2,AKT3,CRK,EGR1,FOS,GNA13,GNAS,GNB1,GNB2,GNB4,GNG10,GNG5,GUCY1A1,HRAS,ITPR1,JUN,MAP2K1,MAP2K2,MAPK3,MYL12A,MYL12B,MYL6,MYL9,PAK3,PIK3C2A,PIK3R2,PLCB4,PRKCA,PTK2,PXN,RAF1,RALB,RAP1A,RAP1B,RHOA,RHOBTB1,RHOC,RHOJ,RHOQ,RND3,ROCK1,ROCK2,RRAS,RRAS2				CXCR4 Signaling	8.59	0.363	-3.501	ADCY7,AKT1,AKT2,AKT3,ARHGEF11,CRK,CXCL12,DOCK1,ELMO1,ELMO2,FNBP1,FOS,GNA11,GNA12,GNA13,GNAI1,GNAI2,GNAI3,GNAO1,GNAQ,GNAS,GNB4,GNG11,GNG12,GNG5,GUCY1A1,ITPR1,ITPR2,KRAS,MAP2K1,MAP2K4,MAPK1,MAPK8,MYL9,NRAS,PAK2,PAK3,PIK3C2A,PIK3CA,PLCB1,PRKCA,PRKCE,PRKCI,PTK2,PXN,RAC1,RALA,RALB,RAP1A,RAP1B,RAP2A,RAP2B,RHOB,RHOJ,RHOQ,RHOT1,RHOU,RND3,ROCK1,ROCK2,RRAS2
36	Actin Cytoskeleton Signaling	10.3	0.336	2.668	ABI2,ACTA2,ACTB,ACTG1,ACTN1,ACTN4,ACTR3,APC,ARHGAP24,ARHGAP35,ARHGEF1,ARHGEF12,ARHGEF6,ARPC1B,ARPC2,ARPC5,CFL2,CRK,CRKL,CYFIP1,DIAPH1,DOCK1,FGF2,FGF7,FN1,GNA12,GNG12,GRB2,GSN,IQGAP1,ITGA1,ITGA5,ITGA9,ITGAV,ITGB1,ITGB5,ITGB8,LBP,MAP2K1,MAPK1,MAPK3,MPRIP,MYH11,MYH9,MYL6,MYL9,MYO10,MYO18A,NCKAP1,NRAS,PAK2,PAK3,PDGFD,PFN1,PIK3C2A,PIK3CA,PIK3R1,PIK3R2,PIP5K1A,PPP1CB,Ppp1r12b,PTK2,PXN,RALB,RAP1B,RAP2A,…			Actin Cytoskeleton Signaling	9.06	0.25	5.082	ACTA2,ACTG1,ACTN1,ACTN4,ACTR2,ACTR3,APC,ARHGAP24,ARHGEF12,ARPC1B,ARPC2,ARPC3,ARPC4,ARPC5,ARPC5L,BAIAP2,BRK1,CFL1,CFL2,CRK,CSK,F2R,FN1,GNA13,GSN,HRAS,ITGA8,ITGAV,ITGB1,ITGB5,LBP,MAP2K1,MAP2K2,MAPK3,MYH11,MYH9,MYL12A,MYL12B,MYL6,MYL9,NCKAP1,PAK3,PDGFA,PDGFD,PFN1,PFN2,PIK3C2A,PIK3R2,PPP1CB,PTK2,PXN,RAF1,RALB,RAP1A,RAP1B,RHOA,ROCK1,ROCK2,RRAS,RRAS2,SHC1				Actin Cytoskeleton Signaling	11	0.352	-2.926	ABI2,ACTA2,ACTG1,ACTN1,ACTN4,ACTR3,APC,ARHGAP24,ARHGAP35,ARHGEF1,ARHGEF12,ARHGEF6,ARPC1B,ARPC2,ARPC4,ARPC5,CFL1,CRK,CRKL,DIAPH1,DOCK1,F2R,FGF2,FGF7,GNA12,GNA13,GNG12,GRB2,GSN,IQGAP1,ITGA1,ITGA9,ITGAV,ITGB1,ITGB5,ITGB8,KRAS,LBP,MAP2K1,MAPK1,MPRIP,MYH10,MYH11,MYH9,MYL9,MYO10,MYO18A,NRAS,PAK2,PAK3,PDGFA,PDGFD,PFN1,PFN2,PIK3C2A,PIK3CA,PIP5K1A,PPP1CB,PPP1R12A,Ppp1r12b,PTK2,PXN,RAC1,RALA,RALB,RAP1A,RAP…
37	Cachexia Signaling Pathway	10.3	0.302	2.183	ACVR2A,ADCY5,AGO2,AGO3,AKT3,BCL2,BECN1,BMPR2,CAPN2,CAPN7,CAPNS1,CASP4,CEBPD,CHUK,Eda,EIF2A,EIF2S1,EIF2S2,EIF2S3,EP300,ERN1,FBXO30,FBXO32,FOXO1,FOXO3,GABARAPL1,GDF15,GSK3B,GUCY1A1,GUCY1B1,HSP90AA1,HSP90AB1,HSP90B1,HSPA1A/HSPA1B,Hspa1b,HSPA4,HSPA5,HSPA8,HSPA9,IFNGR1,IFNGR2,IGF1,IGF1R,IL17D,IL1R1,IL1RAP,IL33,IL6,IL6R,INHBA,INSR,KLF15,LIFR,MALAT1,MAP1LC3B,MAP2K4,MAPK1,MAPK14,MAPK3,MAPK8,MAPK9,MFN1,MY…			Cachexia Signaling Pathway	8.51	0.217	4.696	ACVR1,ADCY7,AGO2,AKT1,AKT2,AKT3,BMPR2,CAPNS1,CASP4,CEBPB,EIF2S1,EP300,GNAS,GSK3B,GUCY1A1,HSP90AA1,HSP90AB1,HSP90B1,HSPA4,HSPA5,HSPA8,HSPA9,IFNGR2,IL1R1,IL33,LPL,MALAT1,MAP1LC3B,MAPK3,MEF2C,NOX4,NR3C1,PIK3C2A,PIK3R2,PNPLA2,PRKAR1A,PRKCA,PSMA1,PSMA2,PSMA3,PSMA5,PSMA6,PSMA7,PSMB1,PSMB2,PSMB3,PSMB4,PSMB5,PSMB6,PSMB7,PSMC1,PSMC2,PSMC4,PSMC5,PSMC6,PSMD12,PSMD13,PSMD3,PSMD4,PSMD6,PSMD7,PSMD8,PSMD9,PSME2…				Cachexia Signaling Pathway	7.01	0.283	-4.511	ACVR1,ACVR2A,ADCY7,AGO2,AGO3,AKT1,AKT2,AKT3,BCL2,BECN1,BMPR2,CAPN7,CAPNS1,CEBPB,CEBPD,CHUK,Eda,EIF2A,EIF2AK3,EIF2S1,EIF2S2,EIF2S3,EP300,ERN1,FBXO30,GABARAPL1,GNAS,GSK3B,GUCY1A1,HSP90AA1,HSP90AB1,HSP90B1,HSPA14,HSPA2,HSPA4,HSPA5,HSPA9,IFNGR2,IGF1R,IL1R1,IL1RAP,IL33,IL6R,INHBA,INSR,IRS1,KLF15,LIFR,LPL,MAP2K4,MAPK1,MAPK14,MAPK8,MEF2C,MFN1,MFN2,NFKB1,NFKB2,NR3C1,P4HB,PDE3B,PHGDH,PIK3C2A,PIK3CA,PRKAB2…
38	Regulation of the Epithelial Mesenchymal Transition by Growth Factors Pathway	10.2	0.359	4.837	AKT3,BRAF,CHUK,DOCK10,EGFR,EGR1,FGF2,FGF7,FGFR1,FGFR2,FOS,FOXC2,FOXO1,FRS2,GAB1,GRB2,GSK3B,ID2,IL6,IL6R,JAK1,JAK2,JUN,LATS1,LATS2,MAP2K1,MAP2K4,MAP2K5,MAPK1,MAPK14,MAPK3,MAPK8,MAPK9,MMP2,NFKB1,NFKB2,NRAS,PDGFD,PDGFRA,PDGFRB,PIK3C2A,PIK3CA,PIK3R1,PIK3R2,PTPN11,RALB,RAP1B,RAP2A,RAP2B,RELB,RHOA,RRAS2,SHC1,SHC2,SMAD3,SMAD4,SMURF1,SOS2,STAT3,TCF3,TGFB2,TGFBR2,TNFRSF1A,TNFSF13B,VIM,WWTR1,YAP1,ZEB1,ZEB2			Regulation of the Epithelial Mesenchymal Transition by Growth Factors Pathway	5.62	0.229	2.714	AKT1,AKT2,AKT3,DOCK10,EGR1,FGFR1,FGFR2,FGFRL1,FOS,GSK3B,HRAS,JUN,LATS2,MAP2K1,MAP2K2,MAP2K3,MAPK3,MMP2,PDGFA,PDGFD,PDGFRA,PIK3C2A,PIK3R2,PTPN11,RAF1,RALB,RAP1A,RAP1B,RHOA,RRAS,RRAS2,SHC1,SMAD3,SMAD4,TGFB1,TGFB2,TGFB3,TGFBR1,TNFRSF11B,TNFRSF1A,TNFSF12,TNFSF13B,TWIST1,ZEB2				Regulation of the Epithelial Mesenchymal Transition by Growth Factors Pathway	11.2	0.38	-4.608	AKT1,AKT2,AKT3,ARAF,BRAF,CHUK,DOCK10,EGFR,ETS1,FGF2,FGF7,FGFR1,FGFR2,FGFRL1,FOS,FOXC2,FRS2,GAB1,GRB2,GSK3B,IL6R,JAK1,JAK2,KRAS,LATS1,MAP2K1,MAP2K3,MAP2K4,MAP2K5,MAPK1,MAPK14,MAPK8,MMP2,NFKB1,NFKB2,NRAS,PDGFA,PDGFD,PDGFRB,PIK3C2A,PIK3CA,PTPN11,RAC1,RALA,RALB,RAP1A,RAP1B,RAP2A,RAP2B,REL,RELA,RELB,RRAS2,SHC1,SHC2,SMAD3,SMAD4,SMURF1,SOS1,SOS2,STAT3,TCF3,TGFB2,TGFB3,TGFBR2,TNFRSF1A,TNFSF13B,TWIST1,VIM…
39	COPII-mediated vesicle transport	10.2	0.5	4.333	ANKRD28,ANKRD44,CNIH1,CSNK1D,GOLGA2,LMAN1,MCFD2,NAPA,NSF,PPP6C,PPP6R2,PPP6R3,PREB,RAB1B,SCFD1,SEC16A,SEC16B,SEC23A,SEC23B,SEC23IP,SEC24A,SEC24B,SEC24C,SEC24D,SEC31A,STX17,STX5,TBC1D20,TFG,TRAPPC1,TRAPPC10,TRAPPC5,TRAPPC6A,TRAPPC9,USO1,YKT6			COPII-mediated vesicle transport	4.09	0.278	4.025	BET1,CNIH1,CTSZ,GOLGA2,MCFD2,NAPA,PPP6C,RAB1A,RAB1B,SAR1B,SEC22A,SEC23A,SEC24D,TFG,TMED2,TRAPPC2L,TRAPPC3,TRAPPC4,TRAPPC6A,TRAPPC6B				COPII-mediated vesicle transport	11.1	0.528	-3.569	ANKRD28,BET1,CSNK1D,CTSZ,GOLGA2,GOSR2,LMAN1,LMAN2,MCFD2,NSF,PPP6C,PPP6R2,PPP6R3,PREB,RAB1B,SCFD1,SEC13,SEC16A,SEC16B,SEC22B,SEC23A,SEC23IP,SEC24A,SEC24B,SEC24C,SEC24D,SEC31A,STX17,STX5,TBC1D20,TFG,TMED10,TRAPPC1,TRAPPC2L,TRAPPC6A,TRAPPC9,USO1,YKT6
40	Processing of Capped Intron-Containing Pre-mRNA	10.2	0.321	4.17	AQR,CASC3,CCAR1,CCDC12,CDC40,CDC5L,CHERP,CPSF2,CPSF3,CPSF6,CPSF7,CSTF3,CWC25,CWC27,CWF19L2,DDX42,DDX46,DDX5,DHX15,DNAJC8,FAM50A,FYTTD1,GLE1,GPKOW,HNRNPA2B1,HNRNPD,HNRNPF,HNRNPH2,HNRNPK,HNRNPR,HNRNPU,HSPA8,HTATSF1,IK,LSM6,LSM7,LUC7L3,MAGOH,MFAP1,NSRP1,NUP153,NUP98,PABPN1,PAPOLA,PCBP2,PNN,POLDIP3,POLR2A,POLR2D,PPIG,PPIL2,PRPF38A,PRPF40A,PRPF4B,PRPF6,PRPF8,PUF60,RBM17,RBM42,RBM5,RBM8A,RBMX,RNPC3,RNP…			Processing of Capped Intron-Containing Pre-mRNA	11.5	0.258	5.58	BCAS2,CCAR1,CCDC12,CDC40,CDC5L,CPSF6,CWC25,CWF19L2,DDX46,DHX15,EIF4A3,EIF4E,FAM32A,FAM50A,FYTTD1,HNRNPA2B1,HNRNPC,HNRNPD,HNRNPF,HNRNPH1,HNRNPK,HNRNPL,HNRNPR,HNRNPU,HSPA8,IK,LSM2,LSM3,LSM4,LSM5,LSM7,MAGOH,NSRP1,NUDT21,PABPN1,PCBP2,PHF5A,POLR2A,POLR2C,POLR2F,POLR2G,POLR2H,POLR2J,POLR2K,PPIL2,PPIL3,PTBP1,RAE1,RBM17,RBM7,RBM8A,SAP18,SARNP,SEH1L,SF3B6,SMNDC1,SNRNP27,SNRPB,SNRPB2,SNRPD1,SNRPD3,SRSF1,SR…				Processing of Capped Intron-Containing Pre-mRNA	18.8	0.397	-5.432	ACIN1,AQR,C9orf78,CASC3,CDC40,CHERP,CPSF3,CPSF6,CSTF3,CWC25,CWC27,CWF19L2,DDX39B,DDX42,DDX5,DHX15,DNAJC8,EIF4A3,EIF4E,FAM32A,FAM50A,FYTTD1,GLE1,GTF2F1,HNRNPA2B1,HNRNPC,HNRNPD,HNRNPF,HNRNPR,HNRNPU,HTATSF1,IK,LSM3,LSM4,LUC7L3,MAGOH,MAGOHB,MFAP1,MTREX,NCBP2,NKAP,NUDT21,NUP153,NUP98,NXF1,PABPN1,PAPOLA,PCBP1,PCF11,PNN,POLDIP3,POLR2A,POLR2E,POM121/POM121C,PPIE,PPIG,PPIL2,PPIL3,PPIL4,PQBP1,PRPF38A,PRPF4…
41	STAT3 Pathway	10.2	0.4	3.833	BCL2,BMPR1A,BMPR2,CDKN1A,EGFR,FGF2,FGFR1,FGFR2,FLT1,GHR,IFNAR1,IGF1,IGF1R,IL10RB,IL13RA1,IL17RA,IL1R1,IL31RA,IL3RA,IL6R,IL6ST,INSR,JAK2,MAP2K1,MAP2K4,MAPK1,MAPK14,MAPK3,MAPK8,MAPK9,MYC,NDUFA13,NRAS,NTRK2,NTRK3,PDGFRA,PDGFRB,PIM1,PTPN2,RALB,RAP1B,RAP2A,RAP2B,RRAS2,SOCS1,SOCS2,SOCS3,SOCS4,SOCS5,STAT3,TGFB2,TGFBR2,TGFBR3,VEGFA			STAT3 Pathway	3.07	0.207	3.545	BMPR1A,BMPR2,CDKN1A,FGFR1,FGFR2,FLT1,GHR,HRAS,IL11RA,IL13RA1,IL1R1,IL6ST,MAP2K1,MAP2K2,MAP3K20,MAPK3,PDGFRA,RAF1,RALB,RAP1A,RAP1B,RRAS,RRAS2,SOCS2,TGFB1,TGFB2,TGFBR1,TGFBR3				STAT3 Pathway	6.6	0.356	-3.795	BCL2,BMPR1A,BMPR2,CDKN1A,EGFR,FGF2,FGFR1,FGFR2,FLT1,GHR,IFNAR1,IGF1R,IGF2R,IL10RB,IL11RA,IL13RA1,IL17RA,IL1R1,IL31RA,IL3RA,IL6R,IL6ST,INSR,JAK2,KRAS,MAP2K1,MAP2K4,MAP3K20,MAPK1,MAPK14,MAPK8,NRAS,NTRK2,PDGFRB,PTPN2,RAC1,RALA,RALB,RAP1A,RAP1B,RAP2A,RAP2B,RRAS2,SOCS4,SOCS5,STAT3,TGFB2,TGFBR2
42	Glioma Signaling	10	0.408	3.053	ABL1,AKT3,Calm1 (includes others),CAMK1D,CAMK2D,CCND2,CCND3,CDKN1A,CDKN2C,EGFR,GRB2,HDAC1,HDAC3,HDAC5,HDAC7,HDAC8,HDAC9,IDH1,IDH2,IDH3G,IGF1,IGF1R,MAP2K1,MAPK1,MAPK3,NRAS,PA2G4,PDGFD,PDGFRA,PDGFRB,PIK3C2A,PIK3CA,PIK3R1,PIK3R2,PRKCA,PRKCE,PRKCI,PRKD1,PRKD3,RALB,RAP1B,RAP2A,RAP2B,RB1,RBL2,RRAS2,SHC1,SIN3A,SOS2,TFDP1,TP53			Glioma Signaling	7.27	0.288	2.858	ABL1,AKT1,AKT2,AKT3,Calm1 (includes others),CAMK1D,CAMK2D,CCND2,CCND3,CDK4,CDKN1A,CDKN2D,HDAC2,HRAS,IDH1,IDH2,MAP2K1,MAP2K2,MAPK3,PA2G4,PDGFA,PDGFD,PDGFRA,PIK3C2A,PIK3R2,PRKCA,PTEN,RAF1,RALB,RAP1A,RAP1B,RRAS,RRAS2,SHC1,TFDP1,TP53				Glioma Signaling	9.86	0.416	-3.307	ABL1,AKT1,AKT2,AKT3,Calm1 (includes others),CAMK1,CAMK1D,CAMK2D,CCND2,CDK4,CDKN1A,CDKN2C,EGFR,GRB2,HDAC1,HDAC3,HDAC4,HDAC5,HDAC7,HDAC8,IDH2,IDH3B,IDH3G,IGF1R,IGF2R,KRAS,MAP2K1,MAPK1,NRAS,PA2G4,PDGFA,PDGFD,PDGFRB,PIK3C2A,PIK3CA,PRKCA,PRKCE,PRKCI,RALA,RALB,RAP1A,RAP1B,RAP2A,RAP2B,RB1,RBL2,RRAS2,SHC1,SOS1,SOS2,TFDP1,TP53
43	IL-6 Signaling	9.95	0.403	3.96	AKT3,CHUK,COL1A1,CSNK2A1,CSNK2A2,FOS,GRB2,HSPB1,HSPB7,IL1R1,IL1RAP,IL33,IL6,IL6R,IL6ST,JAK2,JUN,LBP,MAP2K1,MAP2K4,MAP3K14,MAP4K4,MAPK1,MAPK14,MAPK3,MAPK8,MAPK9,MAPKAPK2,MCL1,NFKB1,NFKB2,NFKBIA,NFKBIB,NRAS,PIK3C2A,PIK3CA,PIK3R1,PIK3R2,PTPN11,RALB,RAP1B,RAP2A,RAP2B,RELB,RRAS2,SHC1,SOCS1,SOCS3,SOS2,STAT3,TNFRSF1A,VEGFA			IL-6 Signaling	5.92	0.264	2.263	AKT1,AKT2,AKT3,CEBPB,COL1A1,CSNK2A1,CSNK2B,FOS,HRAS,HSPB1,HSPB2,HSPB7,IL1R1,IL33,IL6ST,JUN,LBP,MAP2K1,MAP2K2,MAP2K3,MAPK3,MAPKAPK2,PIK3C2A,PIK3R2,PTPN11,RAF1,RALB,RAP1A,RAP1B,RRAS,RRAS2,SHC1,TNFRSF11B,TNFRSF1A				IL-6 Signaling	7.77	0.38	-3.833	AKT1,AKT2,AKT3,CEBPB,CHUK,COL1A1,CSNK2A1,CSNK2A2,FOS,GRB2,IL1R1,IL1RAP,IL33,IL6R,IL6ST,JAK2,KRAS,LBP,MAP2K1,MAP2K3,MAP2K4,MAP3K14,MAP4K4,MAPK1,MAPK14,MAPK8,MAPKAPK2,MCL1,NFKB1,NFKB2,NRAS,PIK3C2A,PIK3CA,PTPN11,RALA,RALB,RAP1A,RAP1B,RAP2A,RAP2B,REL,RELA,RELB,RRAS2,SHC1,SOS1,SOS2,STAT3,TNFRSF1A
44	ERK/MAPK Signaling	9.9	0.344	3.597	ATF1,BRAF,CREB1,CREB3,CREB3L2,CREB5,CREBBP,CRK,CRKL,DOCK1,EIF4EBP1,ELF1,ELF2,ELF4,ELK3,ESR1,ETS2,FOS,FYN,GRB2,H3-3A/H3-3B,HSPB1,HSPB7,ITGA1,ITGA5,ITGA9,ITGAV,ITGB1,ITGB5,ITGB8,KSR1,MAP2K1,MAPK1,MAPK3,MYC,NFATC1,NRAS,PAK2,PAK3,PIK3C2A,PIK3CA,PIK3R1,PIK3R2,PLA2G12A,PPP1CA,PPP1CB,PPP1R7,PPP2CA,PPP2CB,PPP2R2A,PPP2R3A,PPP2R5A,PPP2R5E,PRKACB,PRKAG1,PRKAG2,PRKCA,PRKCE,PRKCI,PTK2,PXN,RALB,RAP1B,RAP2A,RAP…			ERK/MAPK Signaling	7.74	0.247	3.618	ATF1,ATF2,BAD,CREB3L1,CREB3L2,CREB5,CRK,EIF4E,EIF4EBP1,ELF1,ELK3,ESR1,FOS,H3-3A/H3-3B,HRAS,HSPB1,HSPB2,HSPB7,ITGA8,ITGAV,ITGB1,ITGB5,KSR1,LAMTOR3,MAP2K1,MAP2K2,MAPK3,MKNK2,PAK3,PIK3C2A,PIK3R2,PLA2G12A,PLA2G4A,PPP1CA,PPP1CB,PPP1R10,PPP1R14A,PPP1R14B,PPP2CA,PRKAR1A,PRKCA,PTK2,PXN,RAF1,RALB,RAP1A,RAP1B,RRAS,RRAS2,SHC1,YWHAH,YWHAQ,YWHAZ				ERK/MAPK Signaling	13.6	0.391	-2.967	ARAF,ATF1,ATF2,ATF4,BRAF,CREB1,CREB3,CREB3L1,CREB3L2,CREB5,CREBBP,CRK,CRKL,DOCK1,EIF4E,EIF4EBP1,ELF1,ELF2,ELF4,ELK3,ESR1,ETS1,ETS2,FOS,GRB2,ITGA1,ITGA9,ITGAV,ITGB1,ITGB5,ITGB8,KRAS,KSR1,LAMTOR3,MAP2K1,MAPK1,MKNK2,NFATC1,NRAS,PAK2,PAK3,PIK3C2A,PIK3CA,PPP1CA,PPP1CB,PPP1R10,PPP1R11,PPP1R12A,PPP1R7,PPP2CA,PPP2CB,PPP2R1A,PPP2R2A,PPP2R3A,PPP2R5A,PPP2R5E,PRKACA,PRKACB,PRKAG1,PRKAG2,PRKCA,PRKCE,PRKCI,PTK…
45	PDGF Signaling	9.86	0.46	2.846	ABL1,ABL2,ACP1,CRK,CRKL,CSNK2A1,CSNK2A2,FOS,GRB2,JAK1,JAK2,JUN,MAP2K1,MAP2K4,MAPK1,MAPK3,MAPK8,MYC,NRAS,OCRL,PDGFD,PDGFRA,PDGFRB,PIK3C2A,PIK3CA,PIK3R1,PIK3R2,PRKCA,RALB,RAP1B,RAP2A,RAP2B,RASA1,RRAS2,SHC1,SOS2,SPHK1,STAT3,SYNJ1,SYNJ2			PDGF Signaling	5.24	0.287	2.6	ABL1,CAV1,CRK,CSNK2A1,CSNK2B,FOS,HRAS,JUN,MAP2K1,MAP2K2,MAPK3,PDGFA,PDGFD,PDGFRA,PIK3C2A,PIK3R2,PRKCA,RAF1,RALB,RAP1A,RAP1B,RASA1,RRAS,RRAS2,SHC1				PDGF Signaling	7.52	0.425	-2.466	ABL1,ACP1,CRK,CRKL,CSNK2A1,CSNK2A2,FOS,GRB2,JAK1,JAK2,KRAS,MAP2K1,MAP2K4,MAPK1,MAPK8,NRAS,OCRL,PDGFA,PDGFD,PDGFRB,PIK3C2A,PIK3CA,PRKCA,RALA,RALB,RAP1A,RAP1B,RAP2A,RAP2B,RASA1,RRAS2,SHC1,SOS1,SOS2,SPHK1,STAT3,SYNJ2
46	Role of NFAT in Cardiac Hypertrophy	9.81	0.339	4.481	ADCY5,AKT3,CABIN1,CACNA1A,CACNA1C,Calm1 (includes others),CAMK1D,CAMK2D,CHP1,CSNK1A1,EP300,GNAI2,GNAI3,GNAQ,GNB4,GNG10,GNG11,GNG12,GNG5,GRB2,GSK3B,GUCY1A1,GUCY1B1,HDAC1,HDAC3,HDAC5,HDAC7,HDAC8,HDAC9,IGF1,IGF1R,IL6,IL6R,IL6ST,ITPR2,MAP2K1,MAP2K4,MAPK1,MAPK14,MAPK3,MAPK8,MAPK9,MEF2A,MEF2D,NRAS,PDIA3,PIK3C2A,PIK3CA,PIK3R1,PIK3R2,PLCB1,PLCB4,PLCE1,PLCL1,PPP3CA,PPP3CB,PRKACB,PRKAG1,PRKAG2,PRKCA,PRKCE,…			Role of NFAT in Cardiac Hypertrophy	6.31	0.228	3.13	ADCY7,AKT1,AKT2,AKT3,CACNA1A,CACNA1C,Calm1 (includes others),CAMK1D,CAMK2D,CHP1,CSNK1A1,EP300,GNAS,GNB1,GNB2,GNB4,GNG10,GNG5,GSK3B,GUCY1A1,HDAC2,HRAS,IL6ST,ITPR1,MAP2K1,MAP2K2,MAP2K3,MAPK3,MEF2A,MEF2C,PDIA3,PIK3C2A,PIK3R2,PLCB4,PLCL1,PPP3CB,PPP3R1,PRKAR1A,PRKCA,RAF1,RALB,RAP1A,RAP1B,RCAN2,RRAS,RRAS2,SHC1,TGFB1,TGFB2,TGFB3,TGFBR1				Role of NFAT in Cardiac Hypertrophy	9.35	0.344	-4.158	ADCY7,AKT1,AKT2,AKT3,CABIN1,CACNA1A,CACNA2D1,Calm1 (includes others),CAMK1,CAMK1D,CAMK2D,CSNK1A1,EP300,GNAI1,GNAI2,GNAI3,GNAQ,GNAS,GNB4,GNG11,GNG12,GNG5,GRB2,GSK3B,GUCY1A1,HDAC1,HDAC3,HDAC4,HDAC5,HDAC7,HDAC8,IGF1R,IL6R,IL6ST,ITPR1,ITPR2,KRAS,MAP2K1,MAP2K3,MAP2K4,MAPK1,MAPK14,MAPK8,MEF2A,MEF2C,MEF2D,NRAS,PDIA3,PIK3C2A,PIK3CA,PLCB1,PLCE1,PLCL1,PPP3CA,PPP3CB,PRKACA,PRKACB,PRKAG1,PRKAG2,PRKCA,PRKCE,P…
47	RAF/MAP kinase cascade	9.76	0.324	4.5	ACTB,ACTG1,APBB1IP,BRAF,BRAP,CAMK2D,CUL3,DAB2IP,DLG1,DLG2,DUSP16,EGFR,ERBB4,FGF2,FGF7,FGFR1,FGFR2,FN1,FRS2,FYN,GFRA2,GRB2,IL3RA,IQGAP1,IRS2,JAK1,JAK2,KITLG,KSR1,MAP2K1,MAPK1,MAPK3,MARK3,NCAM1,NF1,NRAS,PDGFRA,PDGFRB,PEBP1,PIK3CA,PIK3R1,PIK3R2,PPP1CB,PPP2CA,PPP2CB,PPP2R5A,PPP2R5E,PSMA6,PSMB4,PSMB7,PSMC1,PSMC3,PSMD1,PSMD11,PSMD12,PSMD13,PSMD2,PSMD3,PSMD4,PSMD7,PSMD8,PSME2,PSME4,PTK2,PTPN3,PTPRA,RANB…			RAF/MAP kinase cascade	10.3	0.256	6.155	ACTG1,APBB1IP,CAMK2D,CSK,CUL3,DAB2IP,FGFR1,FGFR2,FN1,GFRA2,HBEGF,HRAS,KSR1,LAMTOR2,LAMTOR3,MAP2K1,MAP2K2,MAPK3,MARK3,NCAM1,PDGFA,PDGFRA,PEBP1,PIK3R2,PPP1CB,PPP2CA,PPP5C,PSMA1,PSMA2,PSMA3,PSMA5,PSMA6,PSMA7,PSMB1,PSMB2,PSMB3,PSMB4,PSMB5,PSMB6,PSMB7,PSMC1,PSMC2,PSMC4,PSMC5,PSMC6,PSMD12,PSMD13,PSMD3,PSMD4,PSMD6,PSMD7,PSMD8,PSMD9,PSME2,PSME4,PTK2,RAF1,RANBP9,RAP1A,RAP1B,RASA1,RASA3,RPS27A,SHC1,SPTAN1,…				RAF/MAP kinase cascade	10.8	0.344	-5.83	ACTG1,ANGPT1,APBB1IP,ARAF,ARRB1,BRAF,BRAP,CAMK2D,CUL3,DAB2IP,DLG1,DLG2,DLG4,DUSP16,DUSP5,DUSP8,EGFR,FGF2,FGF7,FGFR1,FGFR2,FLT3LG,FRS2,GRB2,HBEGF,IL3RA,IQGAP1,IRS1,IRS2,JAK1,JAK2,KRAS,KSR1,LAMTOR3,MAP2K1,MAPK1,MARK3,NF1,NRAS,PDGFA,PDGFRB,PEA15,PEBP1,PIK3CA,PPP1CB,PPP2CA,PPP2CB,PPP2R1A,PPP2R5A,PPP2R5E,PSMA1,PSMA7,PSMB10,PSMB4,PSMB7,PSMB8,PSMC3,PSMC6,PSMD1,PSMD11,PSMD12,PSMD2,PSMD3,PSMD4,PSMD6,PSMD9…
48	Signaling by NTRK1 (TRKA)	9.72	0.469	3.893	AP2A2,ATF1,BRAF,CLTC,CREB1,CRK,CRKL,DNM1,DNM2,DNM3,DUSP3,FRS2,GRB2,IRS2,KIDINS220,MAP2K1,MAP2K5,MAPK1,MAPK14,MAPK3,MAPKAPK2,MEF2A,NGF,NRAS,NTRK2,PIK3CA,PIK3R1,PIK3R2,PPP2CA,PPP2CB,RALB,RAPGEF1,RHOA,RPS6KA3,SHC1,SHC2,STAT3,YWHAB			Signaling by NTRK1 (TRKA)	4.78	0.284	3.545	AP2A1,AP2S1,ATF1,CLTA,CLTC,CRK,DNM1,DUSP3,HRAS,KIDINS220,MAP2K1,MAP2K2,MAPK3,MAPKAPK2,MEF2A,MEF2C,PIK3R2,PPP2CA,RALB,RAP1A,RHOA,RIT1,SHC1				Signaling by NTRK1 (TRKA)	10.5	0.494	-4.743	AP2A2,AP2M1,ATF1,BRAF,CLTC,CREB1,CRK,CRKL,DNM1L,DNM2,DNM3,DUSP3,FRS2,GRB2,IRS1,IRS2,KIDINS220,KRAS,MAP2K1,MAP2K5,MAPK1,MAPK14,MAPKAPK2,MEF2A,MEF2C,NGF,NRAS,NTRK2,PIK3CA,PPP2CA,PPP2CB,PPP2R1A,RALA,RALB,RAP1A,SHC1,SHC2,SOS1,STAT3,YWHAB
49	NGF Signaling	9.65	0.408	4.824	AKT3,CHUK,CREB1,CREB3,CREB3L2,CREB5,CREBBP,CRK,GAB1,GRB2,MAP2K1,MAP2K4,MAP3K14,MAP3K2,MAP3K3,MAP3K4,MAP3K5,MAP3K6,Map3k7,MAP3K8,MAPK1,MAPK3,MAPK8,MAPK9,NFKB1,NFKB2,NGF,NRAS,PDPK1,PIK3C2A,PIK3CA,PIK3R1,PIK3R2,PTPN11,RALB,RAP1B,RAP2A,RAP2B,RELB,RHOA,ROCK1,ROCK2,RPS6KA3,RPS6KB1,RRAS2,SHC1,SHC2,SOS2,TP53			NGF Signaling	5.26	0.258	4.426	AKT1,AKT2,AKT3,ATF2,BAX,CREB3L1,CREB3L2,CREB5,CRK,HRAS,MAP2K1,MAP2K2,MAP3K2,Map3k7,MAPK3,PIK3C2A,PIK3R2,PTPN11,RAF1,RALB,RAP1A,RAP1B,RHOA,ROCK1,ROCK2,RPS6KB1,RRAS,RRAS2,SHC1,SMPD3,TP53				NGF Signaling	13.1	0.467	-3.286	AKT1,AKT2,AKT3,ATF2,ATF4,CHUK,CREB1,CREB3,CREB3L1,CREB3L2,CREB5,CREBBP,CRK,GAB1,GRB2,KRAS,MAP2K1,MAP2K4,MAP3K14,MAP3K2,MAP3K3,MAP3K4,MAP3K5,MAP3K6,Map3k7,MAPK1,MAPK8,NFKB1,NFKB2,NGF,NRAS,PDPK1,PIK3C2A,PIK3CA,PTPN11,RAC1,RALA,RALB,RAP1A,RAP1B,RAP2A,RAP2B,REL,RELA,RELB,ROCK1,ROCK2,RPS6KB1,RRAS2,SHC1,SHC2,SMPD1,SOS1,SOS2,TP53,TRIO
50	Sertoli Cell-Sertoli Cell Junction Signaling	9.57	0.329	3.578	ACTA2,ACTB,ACTG1,ACTN1,ACTN4,AFDN,AKT3,AXIN1,CDH11,CDH13,CLINT1,CREB1,CREB3,CREB3L2,CREB5,CREBBP,CTNNA1,DLG1,EGFR,EPB41,EPN1,EPN2,GJA1,GRB2,ICAM1,IL1R1,IL1RAP,ITGB1,JUN,KEAP1,LAMA2,LAMA4,LAMB1,LAMB2,LAMC1,LAMC3,MAP2K1,MAP2K4,MAP3K14,MAP3K2,MAP3K3,MAP3K4,MAP3K5,MAP3K6,Map3k7,MAP3K8,MAPK1,MAPK14,MAPK3,MAPK8,MAPK9,NECTIN3,NFKB1,NFKB2,NRAS,PAK2,PAK3,PIK3C2A,PIK3CA,PIK3R1,PIK3R2,PTK2,RAB8B,RALB,RAP1B,…			Sertoli Cell-Sertoli Cell Junction Signaling	6.67	0.226	2.562	ACTA2,ACTG1,ACTN1,ACTN4,AKT1,AKT2,AKT3,AR,ATF2,CLINT1,COL4A3,CREB3L1,CREB3L2,CREB5,CTNNB1,EPN2,HRAS,IL1R1,ITGB1,JAM2,JUN,LAMA2,LAMB1,LAMC1,MAP2K1,MAP2K2,MAP2K3,MAP3K2,MAP3K20,Map3k7,MAPK3,NECTIN3,PAK3,PIK3C2A,PIK3R2,PTK2,RAF1,RALB,RAP1A,RAP1B,RRAS,RRAS2,SPTAN1,SPTBN1,TGFB3,TGFBR1,TIMP1,TNFRSF11B,TNFRSF1A,TUBA1B,TUBA1C,TUBB2A,TUBB2B,TUBB4B,YBX3				Sertoli Cell-Sertoli Cell Junction Signaling	9.07	0.333	-4.111	ACTA2,ACTG1,ACTN1,ACTN4,AKT1,AKT2,AKT3,AR,ATF2,ATF4,CDH11,CLINT1,CREB1,CREB3,CREB3L1,CREB3L2,CREB5,CREBBP,CTNNA1,CTNNB1,DLG1,EGFR,EPN1,GRB2,ICAM1,IL1R1,IL1RAP,ITGB1,JAM2,JAM3,JUP,KEAP1,KRAS,LAMA4,LAMB1,LAMC1,LAMC3,MAP2K1,MAP2K3,MAP2K4,MAP3K14,MAP3K2,MAP3K20,MAP3K3,MAP3K4,MAP3K5,MAP3K6,Map3k7,MAPK1,MAPK14,MAPK8,NECTIN3,NFKB1,NFKB2,NRAS,PAK2,PAK3,PIK3C2A,PIK3CA,PTK2,RAB8B,RAC1,RALA,RALB,RAP1A,RAP1B…
51	Transcriptional regulation by RUNX3	9.48	0.438	2.667	BCL2L11,CBFB,CCN2,CDKN1A,CREBBP,EP300,FOXO3,KAT2B,MAML1,MAML3,MYC,PSMA6,PSMB4,PSMB7,PSMC1,PSMC3,PSMD1,PSMD11,PSMD12,PSMD13,PSMD2,PSMD3,PSMD4,PSMD7,PSMD8,PSME2,RBPJ,RUNX1,SEM1,SMAD3,SMAD4,SMURF1,SMURF2,SNW1,TCF7L1,TCF7L2,TEAD1,TP53,UBC,WWTR1,YAP1,ZFHX3			Transcriptional regulation by RUNX3	14.5	0.427	4.743	CBFB,CCN2,CDKN1A,CTNNB1,EP300,HES1,KAT2B,PSMA1,PSMA2,PSMA3,PSMA5,PSMA6,PSMA7,PSMB1,PSMB2,PSMB3,PSMB4,PSMB5,PSMB6,PSMB7,PSMC1,PSMC2,PSMC4,PSMC5,PSMC6,PSMD12,PSMD13,PSMD3,PSMD4,PSMD6,PSMD7,PSMD8,PSMD9,PSME2,RPS27A,SMAD3,SMAD4,TEAD1,TGFB1,TP53,UBC				Transcriptional regulation by RUNX3	12	0.49	-3.592	BCL2L11,BRD2,CBFB,CCN2,CDKN1A,CREBBP,CTNNB1,EP300,HDAC4,JAG1,KAT2B,KRAS,MAML1,MAML3,PSMA1,PSMA7,PSMB10,PSMB4,PSMB7,PSMB8,PSMC3,PSMC6,PSMD1,PSMD11,PSMD12,PSMD2,PSMD3,PSMD4,PSMD6,PSMD9,PSME1,RBPJ,RUNX1,SEM1,SMAD3,SMAD4,SMURF1,SMURF2,SNW1,TCF7L1,TCF7L2,TEAD1,TP53,UBC,WWTR1,YAP1,ZFHX3
52	14-3-3-mediated Signaling	9.17	0.394	2.967	AKT1S1,AKT3,CDKN1B,FOS,FOXO1,GRB2,GSK3B,JUN,MAP2K1,MAP2K4,MAP3K5,MAPK1,MAPK3,MAPK8,MAPK9,NRAS,PDCD6IP,PDIA3,PIK3C2A,PIK3CA,PIK3R1,PIK3R2,PLCB1,PLCB4,PLCE1,PLCL1,PRKCA,PRKCE,PRKCI,PRKD1,PRKD3,RALB,RAP1B,RAP2A,RAP2B,RRAS2,SRPK2,STK11,TNFRSF1A,TUBA1A,TUBA1B,TUBA1C,TUBB,TUBB2A,TUBB4B,VIM,YAP1,YWHAB,YWHAE,YWHAG			14-3-3-mediated Signaling	7.08	0.283	2.268	AKT1,AKT2,AKT3,BAD,BAX,FOS,GSK3B,HRAS,JUN,MAP2K1,MAP2K2,MAPK3,PDCD6IP,PDIA3,PIK3C2A,PIK3R2,PLCB4,PLCL1,PRKCA,RAF1,RALB,RAP1A,RAP1B,RRAS,RRAS2,SRPK2,TNFRSF1A,TUBA1B,TUBA1C,TUBB2A,TUBB2B,TUBB4B,YWHAE,YWHAH,YWHAQ,YWHAZ				14-3-3-mediated Signaling	6.62	0.362	-2.722	AKT1,AKT1S1,AKT2,AKT3,CBL,CDKN1B,FOS,GRB2,GSK3B,KRAS,MAP2K1,MAP2K4,MAP3K5,MAPK1,MAPK8,NRAS,PDCD6IP,PDIA3,PIK3C2A,PIK3CA,PLCB1,PLCE1,PLCL1,PRKCA,PRKCE,PRKCI,RALA,RALB,RAP1A,RAP1B,RAP2A,RAP2B,RRAS2,SRPK2,STK11,TNFRSF1A,TUBA1C,TUBB2A,TUBB4B,TUBB6,VIM,YAP1,YWHAB,YWHAE,YWHAG,YWHAQ
53	trans-Golgi Network Vesicle Budding	9.13	0.473	3.55	ACBD3,AP1G1,AP1S2,AP3B1,AP3S1,APP,BLOC1S1,CHMP2A,CLINT1,CLTB,CLTC,CPD,DNM2,DTNBP1,FTH1,FTL,GAK,GBF1,GNS,GOLGB1,HSPA8,NAPA,OCRL,PICALM,PIK3C2A,PUM1,RAB5C,SH3D19,SNAP23,SNAPIN,SNX2,SNX9,TBC1D8B,TXNDC5,VAMP2			trans-Golgi Network Vesicle Budding	9.39	0.392	4.271	AP1S1,AP1S2,AP3S1,AP4S1,APP,BLOC1S1,CHMP2A,CLINT1,CLTA,CLTB,CLTC,CTSZ,DTNBP1,FTH1,FTL,GNS,GOLGB1,HSPA8,NAPA,PICALM,PIK3C2A,PUM1,SNAP23,SNAPIN,SNX2,STX4,TXNDC5,VAMP2,VAMP7				trans-Golgi Network Vesicle Budding	9.96	0.5	-3.781	ACBD3,AP1G1,AP1S1,AP3B1,AP4S1,APP,ARF1,ARRB1,BLOC1S1,CLINT1,CLTB,CLTC,CPD,CTSZ,DNM2,FTH1,GBF1,GNS,GOLGB1,IGF2R,M6PR,OCRL,PICALM,PIK3C2A,RAB5C,SH3D19,SNAP23,SNAPIN,SNX2,SNX5,SNX9,STX4,TBC1D8B,TXNDC5,VAMP2,VAMP7,YIPF6
54	Neurotrophin/TRK Signaling	9	0.462	3.182	CREB1,CREB3,CREB3L2,CREB5,CREBBP,FOS,FRS2,GAB1,GRB2,JUN,MAP2K1,MAP2K4,MAP2K5,MAP3K5,MAPK1,MAPK3,MAPK8,NGF,NRAS,NTF3,NTRK2,NTRK3,PDPK1,PIK3C2A,PIK3CA,PIK3R1,PIK3R2,PTPN11,RALB,RAP1B,RAP2A,RAP2B,RRAS2,SHC1,SOS2,SPRY1			Neurotrophin/TRK Signaling	5.63	0.308	3.838	AKT1,ATF2,CREB3L1,CREB3L2,CREB5,FOS,HRAS,JUN,MAP2K1,MAP2K2,MAP2K3,MAPK3,NTF3,PIK3C2A,PIK3R2,PTPN11,RAF1,RALB,RAP1A,RAP1B,RRAS,RRAS2,SHC1,SPRY1				Neurotrophin/TRK Signaling	11.2	0.513	-2.333	AKT1,ATF2,ATF4,CREB1,CREB3,CREB3L1,CREB3L2,CREB5,CREBBP,FOS,FRS2,GAB1,GRB2,KRAS,MAP2K1,MAP2K3,MAP2K4,MAP2K5,MAP3K5,MAPK1,MAPK8,NGF,NRAS,NTRK2,PDPK1,PIK3C2A,PIK3CA,PTPN11,RALA,RALB,RAP1A,RAP1B,RAP2A,RAP2B,RRAS2,SHC1,SOS1,SOS2,SPRY1,SPRY2
55	GNRH Signaling	8.99	0.346	4.276	ADCY5,CACNA1A,CACNA1C,Calm1 (includes others),CAMK2D,CREB1,CREB3,CREB3L2,CREB5,CREBBP,EGFR,EGR1,FOS,GNAI2,GNAI3,GNAQ,GNB4,GNG10,GNG11,GNG12,GNG5,GRB2,GUCY1A1,GUCY1B1,ITPR2,JUN,MAP2K1,MAP2K4,MAP3K14,MAP3K2,MAP3K3,MAP3K4,MAP3K5,MAP3K6,Map3k7,MAP3K8,MAPK1,MAPK14,MAPK3,MAPK8,MAPK9,MMP2,NFKB1,NFKB2,NRAS,PAK2,PAK3,PLCB1,PLCB4,PRKACB,PRKAG1,PRKAG2,PRKCA,PRKCE,PRKCI,PRKD1,PRKD3,PTK2,PXN,RALB,RAP1B,RAP2A,…			GNRH Signaling	4.56	0.215	2.475	ADCY7,ATF2,CACNA1A,CACNA1C,Calm1 (includes others),CAMK2D,CREB3L1,CREB3L2,CREB5,EGR1,FOS,GNAS,GNB1,GNB2,GNB4,GNG10,GNG5,GUCY1A1,HBEGF,HRAS,ITPR1,JUN,MAP2K1,MAP2K2,MAP2K3,MAP3K2,Map3k7,MAPK3,MMP2,PAK3,PLCB4,PRKAR1A,PRKCA,PTK2,PXN,RAF1,RALB,RAP1A,RAP1B,RRAS,RRAS2				GNRH Signaling	11.4	0.382	-4.158	ADCY7,ATF2,ATF4,CACNA1A,CACNA2D1,Calm1 (includes others),CAMK2D,CREB1,CREB3,CREB3L1,CREB3L2,CREB5,CREBBP,EGFR,FOS,GNA11,GNAI1,GNAI2,GNAI3,GNAQ,GNAS,GNB4,GNG11,GNG12,GNG5,GRB2,GUCY1A1,HBEGF,ITPR1,ITPR2,KRAS,MAP2K1,MAP2K3,MAP2K4,MAP3K14,MAP3K2,MAP3K3,MAP3K4,MAP3K5,MAP3K6,Map3k7,MAPK1,MAPK14,MAPK8,MMP2,NFKB1,NFKB2,NRAS,PAK2,PAK3,PLCB1,PRKACA,PRKACB,PRKAG1,PRKAG2,PRKCA,PRKCE,PRKCI,PTK2,PXN,RAC1,RALA,…
56	Insulin Secretion Signaling Pathway	8.97	0.313	4.196	ABCC9,ADCY5,AGO2,AGO3,BET1L,CACNA1A,CACNA1C,CAMK2D,CLCN3,CREB1,CREB3,CREB3L2,CREB5,CREBBP,DLAT,DLD,EIF2A,EIF2S1,EIF2S2,EIF2S3,EIF4A1,EIF4A2,EIF4E3,EIF4EBP1,EIF4EBP2,EIF4G1,EIF4G3,FURIN,FYN,GHR,GNAQ,GUCY1A1,GUCY1B1,INSR,ITPR2,JAK1,JAK2,KLF11,MAPK1,MAPK14,MAPK3,NALCN,NAPA,NSF,PABPC1,PDHA1,PDIA3,PIK3C2A,PIK3CA,PIK3R1,PIK3R2,PLCB1,PLCB4,PLCE1,PLCL1,PRKACB,PRKAG1,PRKAG2,PRKCA,PRKCE,PRKCI,PRKD1,PRKD3,R…			Insulin Secretion Signaling Pathway	4.31	0.193	4.714	ABCC9,ADCY7,AGO2,ATF2,CACNA1A,CACNA1C,CAMK2D,CREB3L1,CREB3L2,CREB5,DLD,EIF2S1,EIF4A1,EIF4A2,EIF4A3,EIF4E,EIF4EBP1,EIF4EBP2,EIF4G1,EIF4G2,FURIN,GHR,GNAS,GPAA1,GUCY1A1,ITPR1,KCNJ8,MAPK3,NALCN,NAPA,PABPC1,PAIP1,PDHA1,PDIA3,PIK3C2A,PIK3R2,PLCB4,PLCL1,PRKAR1A,PRKCA,RAP1A,RAP1B,RPS6KB1,SEC61G,SPCS1,SRP72,SRP9,SSR1,SSR2,SSR3,SSR4,STAT6,VAMP2				Insulin Secretion Signaling Pathway	8.78	0.32	-6.111	ADCY7,AGO2,AGO3,ATF2,ATF4,BET1L,CACNA1A,CACNA2D1,CAMK2D,CREB1,CREB3,CREB3L1,CREB3L2,CREB5,CREBBP,DLAT,DLD,EIF2A,EIF2AK3,EIF2S1,EIF2S2,EIF2S3,EIF4A1,EIF4A2,EIF4A3,EIF4E,EIF4E3,EIF4EBP1,EIF4EBP2,EIF4G1,EIF4G2,EIF4G3,ELP5,GHR,GNA11,GNAQ,GNAS,GOSR2,GUCY1A1,INSR,ITPR1,ITPR2,JAK1,JAK2,KCNJ8,KLF11,MAPK1,MAPK14,NALCN,NSF,PABPC1,PDIA3,PIK3C2A,PIK3CA,PLCB1,PLCE1,PLCL1,PRKACA,PRKACB,PRKAG1,PRKAG2,PRKCA,PRKC…
57	Neddylation	8.89	0.321	4.163	ASB3/GPR75-ASB3,BTBD1,BTRC,CDKN1A,COMMD10,COMMD8,COP1,Cops2,COPS3,COPS5,COPS6,CUL1,CUL3,CUL4A,CUL5,DCAF10,DCAF5,DCAF6,DCAF8,DCUN1D3,DDA1,DDB1,ELOC,FBXL20,FBXL3,FBXL5,FBXL7,FBXO11,FBXO22,FBXO30,FBXO32,FBXO6,FBXW11,FBXW2,FBXW7,FBXW8,FEM1B,HIF1A,KEAP1,KLHL21,KLHL5,KLHL9,NEDD8,NFE2L2,NUB1,PSMA6,PSMB4,PSMB7,PSMC1,PSMC3,PSMD1,PSMD11,PSMD12,PSMD13,PSMD2,PSMD3,PSMD4,PSMD7,PSMD8,PSME2,PSME4,PUM2,RBBP7,RNF…			Neddylation	16.4	0.309	7.571	ASB3/GPR75-ASB3,BTBD1,CDKN1A,COMMD1,COMMD10,COMMD2,COMMD3,COMMD4,COMMD8,COP1,Cops2,CUL3,CUL4B,CUL5,DCAF6,DCUN1D1,DCUN1D5,DDA1,ELOC,FBXL3,FBXL5,FBXO11,FBXO31,FBXO4,FBXO6,FBXO9,FBXW2,GPS1,HIF1A,NAE1,NEDD8,PSMA1,PSMA2,PSMA3,PSMA5,PSMA6,PSMA7,PSMB1,PSMB2,PSMB3,PSMB4,PSMB5,PSMB6,PSMB7,PSMC1,PSMC2,PSMC4,PSMC5,PSMC6,PSMD12,PSMD13,PSMD3,PSMD4,PSMD6,PSMD7,PSMD8,PSMD9,PSME2,PSME4,RBBP7,RNF7,RPS27A,SOCS2,SP…				Neddylation	11.2	0.354	-5.468	BTBD1,BTRC,CDKN1A,COMMD1,COMMD10,COMMD2,COMMD7,COMMD8,COP1,Cops2,COPS3,COPS4,COPS5,COPS6,COPS7A,COPS8,CUL1,CUL3,CUL4A,CUL4B,DCAF10,DCAF5,DCAF6,DCAF7,DCAF8,DCUN1D3,DDB1,FBXL20,FBXL7,FBXO11,FBXO22,FBXO30,FBXO4,FBXO6,FBXW11,FBXW2,FBXW7,FBXW8,FEM1B,FEM1C,GPS1,HIF1A,KEAP1,KLHL13,KLHL21,KLHL5,KLHL9,LRRC41,NFE2L2,NUB1,PSMA1,PSMA7,PSMB10,PSMB4,PSMB7,PSMB8,PSMC3,PSMC6,PSMD1,PSMD11,PSMD12,PSMD2,PSMD3,PSMD4…
58	RAB GEFs exchange GTP for GDP on RABs	8.88	0.438	4.003	AKT3,ANKRD27,CCZ1/CCZ1B,DENND1A,DENND1B,DENND2A,DENND4A,DENND4C,DENND5A,DENND6A,GAPVD1,GDI2,RAB10,RAB12,RAB13,RAB14,RAB18,RAB1B,RAB21,RAB31,RAB35,RAB3GAP1,RAB3GAP2,RAB5A,RAB5B,RAB5C,RAB6B,RAB7A,RAB8B,RAB9A,RABGEF1,RIN2,SBF2,TRAPPC1,TRAPPC10,TRAPPC5,TRAPPC6A,TRAPPC9,YWHAE			RAB GEFs exchange GTP for GDP on RABs	4.55	0.27	3.266	AKT1,AKT2,AKT3,DENND4A,GDI2,RAB12,RAB13,RAB18,RAB1A,RAB1B,RAB21,RAB3A,RAB5A,RAB6A,RAB7A,RAB9A,RIN2,SBF2,TRAPPC2L,TRAPPC3,TRAPPC4,TRAPPC6A,TRAPPC6B,YWHAE				RAB GEFs exchange GTP for GDP on RABs	8.93	0.449	-3.162	AKT1,AKT2,AKT3,CCZ1/CCZ1B,CHM,DENND1A,DENND1B,DENND2A,DENND4C,DENND5A,DENND5B,DENND6A,GAPVD1,GDI1,GDI2,RAB10,RAB13,RAB14,RAB18,RAB1B,RAB21,RAB31,RAB3GAP1,RAB3GAP2,RAB3IL1,RAB5A,RAB5B,RAB5C,RAB7A,RAB8A,RAB8B,RAB9A,RABGEF1,RIN2,SBF2,TRAPPC1,TRAPPC2L,TRAPPC6A,TRAPPC9,YWHAE
59	RAC Signaling	8.84	0.38	4.824	ABI2,ACTR3,ARPC1B,ARPC2,ARPC5,CFL2,CYFIP1,ELK4,IQGAP1,ITGA1,ITGA5,ITGA9,ITGAV,ITGB1,ITGB5,ITGB8,JUN,MAP2K1,MAP2K4,MAPK1,MAPK3,MAPK8,NCKAP1,NFKB1,NFKB2,NOX4,NRAS,PAK2,PAK3,PARD3,PI4KA,PIK3C2A,PIK3CA,PIK3R1,PIK3R2,PIKFYVE,PIP4K2A,PIP4K2C,PIP5K1A,PLD1,PRKCI,PTK2,RALB,RAP1B,RAP2A,RAP2B,RELB,RHOA,RPS6KB1,RRAS2,SH3RF1,TIAM1			RAC Signaling	6.67	0.27	5.488	ACTR2,ACTR3,ARFIP2,ARPC1B,ARPC2,ARPC3,ARPC4,ARPC5,ARPC5L,BAIAP2,BRK1,CFL1,CFL2,ELK4,HRAS,ITGA8,ITGAV,ITGB1,ITGB5,JUN,MAP2K1,MAP2K2,MAPK3,NCKAP1,NOX4,PAK3,PIK3C2A,PIK3R2,PTK2,RAF1,RALB,RAP1A,RAP1B,RHOA,RPS6KB1,RRAS,RRAS2				RAC Signaling	7.71	0.372	-3.086	ABI2,ACTR3,ARFIP2,ARPC1B,ARPC2,ARPC4,ARPC5,CD44,CFL1,ELK4,IQGAP1,ITGA1,ITGA9,ITGAV,ITGB1,ITGB5,ITGB8,KRAS,MAP2K1,MAP2K4,MAPK1,MAPK8,NFKB1,NFKB2,NRAS,PAK2,PAK3,PARD3,PI4KA,PIK3C2A,PIK3CA,PIKFYVE,PIP4K2A,PIP4K2C,PIP5K1A,PRKCI,PTK2,RAC1,RALA,RALB,RAP1A,RAP1B,RAP2A,RAP2B,REL,RELA,RELB,RPS6KB1,RRAS2,SH3RF1,TIAM1
60	SUMOylation of transcription cofactors	8.82	0.568	3	CASP8AP2,CBX4,CREBBP,DDX17,DDX5,EP300,HIPK2,ING2,MBD1,MRTFA,NCOA1,NCOA2,NPM1,PARK7,PHC2,PHC3,PIAS1,PIAS2,RNF2,SCMH1,SIN3A,SUMO1,SUMO2,SUMO3,UHRF2			SUMOylation of transcription cofactors	2.12	0.25	3.317	CTBP1,EP300,MBD1,NPM1,RNF2,SCMH1,SUMO1,SUMO2,SUMO3,UBE2I,ZNF131				SUMOylation of transcription cofactors	8.43	0.568	-4.2	CASP8AP2,CBX4,CREBBP,CTBP1,DDX17,DDX5,EP300,HIPK2,ING2,MRTFA,NCOA1,NCOA2,NCOR2,PARK7,PHC2,PHC3,PIAS2,RNF2,SCMH1,SUMO3,TOPORS,TRIM28,UBE2I,UHRF2,ZNF131
61	IL-3 Signaling	8.81	0.456	3.667	AKT3,CHP1,CRKL,FOS,FOXO1,GAB2,GRB2,IL3RA,JAK1,JAK2,JUN,MAP2K1,MAPK1,MAPK3,NRAS,PIK3C2A,PIK3CA,PIK3R1,PIK3R2,PPP3CA,PPP3CB,PRKCA,PRKCE,PRKCI,PRKD1,PRKD3,RALB,RAP1B,RAP2A,RAP2B,RAPGEF1,RRAS2,SHC1,STAT3,STAT5B,STAT6			IL-3 Signaling	6.09	0.316	3	AKT1,AKT2,AKT3,BAD,CHP1,FOS,GAB2,HRAS,JUN,MAP2K1,MAP2K2,MAPK3,PIK3C2A,PIK3R2,PPP3CB,PPP3R1,PRKCA,RAF1,RALB,RAP1A,RAP1B,RRAS,RRAS2,SHC1,STAT6				IL-3 Signaling	7.12	0.43	-3.773	AKT1,AKT2,AKT3,CRKL,FOS,GAB2,GRB2,IL3RA,JAK1,JAK2,KRAS,MAP2K1,MAPK1,NRAS,PIK3C2A,PIK3CA,PPP3CA,PPP3CB,PRKCA,PRKCE,PRKCI,RAC1,RALA,RALB,RAP1A,RAP1B,RAP2A,RAP2B,RRAS2,SHC1,SOS1,STAT3,STAT5B,STAT6
62	Signaling by MET	8.81	0.456	3.667	COL1A1,COL3A1,COL5A2,CRK,CRKL,DOCK7,FN1,GAB1,GRB2,ITGB1,LAMA2,LAMA4,LAMB1,LAMB2,LAMC1,LAMC3,LRIG1,NRAS,PIK3CA,PIK3R1,PTK2,PTPN1,PTPN11,PTPN2,PTPRJ,RANBP9,RAP1B,RAPGEF1,SH3GL1,SHC1,STAM,STAM2,STAT3,TNS3,UBC,USP8			Signaling by MET	5.52	0.304	2.449	COL1A1,COL1A2,COL3A1,CRK,DOCK7,FN1,HRAS,ITGB1,LAMA2,LAMB1,LAMC1,PTK2,PTPN11,RAB4B,RANBP9,RAP1A,RAP1B,RPS27A,SH3GL1,SHC1,SPINT2,TNS3,UBC,USP8				Signaling by MET	8.93	0.468	-3.124	CBL,COL1A1,COL1A2,COL3A1,COL5A1,CRK,CRKL,DOCK7,GAB1,GRB2,ITGB1,KRAS,LAMA4,LAMB1,LAMC1,LAMC3,LRIG1,NRAS,PIK3CA,PTK2,PTPN1,PTPN11,PTPN2,RAC1,RANBP9,RAP1A,RAP1B,SH3GL1,SH3KBP1,SHC1,SOS1,STAM,STAM2,STAT3,TNS3,UBC,USP8
63	Cholecystokinin/Gastrin-mediated Signaling	8.71	0.395	3.539	Cdc42,CREM,EGFR,FNBP1,FOS,GNA12,GNAQ,GRB2,IL33,ITPR2,JUN,MAP2K1,MAP2K4,MAP2K5,MAPK1,MAPK14,MAPK3,MAPK8,MAPK9,MEF2A,MEF2D,NRAS,PLCB1,PLCB4,PRKCA,PRKCE,PRKCI,PRKD1,PRKD3,PTGS2,PTK2,PXN,RALB,RAP1B,RAP2A,RAP2B,RHOA,RHOB,RHOC,RHOJ,RHOQ,RHOT1,ROCK1,ROCK2,RRAS2,SHC1,SOS2			Cholecystokinin/Gastrin-mediated Signaling	6.31	0.277	2.828	ATF2,CREM,FOS,GNA13,HRAS,IL33,ITPR1,JUN,MAP2K1,MAP2K2,MAP2K3,MAPK3,MEF2A,MEF2C,PLCB4,PRKCA,PTK2,PXN,RAF1,RALB,RAP1A,RAP1B,RHOA,RHOBTB1,RHOC,RHOJ,RHOQ,RND3,ROCK1,ROCK2,RRAS,RRAS2,SHC1				Cholecystokinin/Gastrin-mediated Signaling	9.15	0.412	-4.33	ATF2,CREM,EGFR,FNBP1,FOS,GNA12,GNA13,GNAQ,GRB2,IL33,ITPR1,ITPR2,KRAS,MAP2K1,MAP2K3,MAP2K4,MAP2K5,MAPK1,MAPK14,MAPK8,MEF2A,MEF2C,MEF2D,NRAS,PLCB1,PRKCA,PRKCE,PRKCI,PTK2,PXN,RAC1,RALA,RALB,RAP1A,RAP1B,RAP2A,RAP2B,RHOB,RHOJ,RHOQ,RHOT1,RHOU,RND3,ROCK1,ROCK2,RRAS2,SHC1,SOS1,SOS2
64	Cardiac Hypertrophy Signaling	8.69	0.314	4.243	ADCY5,CACNA1A,CACNA1C,Calm1 (includes others),Cdc42,CHP1,CREB1,CREBBP,EP300,FNBP1,GNA12,GNAI2,GNAI3,GNAO1,GNAQ,GNB4,GNG10,GNG11,GNG12,GNG5,GRB2,GSK3B,GUCY1A1,GUCY1B1,HAND2,HSPB1,IGF1,IGF1R,IL6,IL6R,JUN,MAP2K1,MAP2K4,MAP3K14,MAP3K2,MAP3K3,MAP3K4,MAP3K5,MAP3K6,Map3k7,MAP3K8,MAPK1,MAPK14,MAPK3,MAPK8,MAPK9,MAPKAPK2,MEF2A,MEF2D,MYL6,MYL9,NRAS,PDIA3,PIK3C2A,PIK3CA,PIK3R1,PIK3R2,PLCB1,PLCB4,PLCE1,PLCL1,…			Cardiac Hypertrophy Signaling	8.26	0.238	3.91	ADCY7,AKT1,ATF2,CACNA1A,CACNA1C,Calm1 (includes others),CHP1,EIF4E,EP300,GNA13,GNAS,GNB1,GNB2,GNB4,GNG10,GNG5,GSK3B,GUCY1A1,HAND2,HRAS,HSPB1,JUN,MAP2K1,MAP2K2,MAP2K3,MAP3K2,Map3k7,MAPK3,MAPKAPK2,MEF2A,MEF2C,MYL12A,MYL12B,MYL6,MYL9,PDIA3,PIK3C2A,PIK3R2,PLCB4,PLCL1,PPP3CB,PPP3R1,PRKAR1A,RAF1,RALB,RAP1A,RAP1B,RHOA,RHOBTB1,RHOC,RHOJ,RHOQ,RND3,ROCK1,ROCK2,RPS6KB1,RRAS,RRAS2,TGFB1,TGFB2,TGFB3,TGFBR1				Cardiac Hypertrophy Signaling	8.55	0.322	-4.65	ADCY7,AKT1,ATF2,CACNA1A,CACNA2D1,Calm1 (includes others),CREB1,CREBBP,EIF4E,EP300,FNBP1,GNA11,GNA12,GNA13,GNAI1,GNAI2,GNAI3,GNAO1,GNAQ,GNAS,GNB4,GNG11,GNG12,GNG5,GRB2,GSK3B,GUCY1A1,HAND2,IGF1R,IL6R,IRS1,KRAS,MAP2K1,MAP2K3,MAP2K4,MAP3K14,MAP3K2,MAP3K3,MAP3K4,MAP3K5,MAP3K6,Map3k7,MAPK1,MAPK14,MAPK8,MAPKAPK2,MEF2A,MEF2C,MEF2D,MYL9,NRAS,PDIA3,PIK3C2A,PIK3CA,PLCB1,PLCE1,PLCL1,PPP3CA,PPP3CB,PRKACA,PRKA…
65	KEAP1-NFE2L2 pathway	8.54	0.429	2.722	AKT3,BACH1,BTRC,CDKN1A,CREBBP,CSNK2A1,CSNK2A2,CUL1,CUL3,EP300,FBXL17,GSK3B,KEAP1,MAFG,MAP1LC3B,NFE2L2,PSMA6,PSMB4,PSMB7,PSMC1,PSMC3,PSMD1,PSMD11,PSMD12,PSMD13,PSMD2,PSMD3,PSMD4,PSMD7,PSMD8,PSME2,PSME4,SEM1,SESN1,SQSTM1,UBC,UBXN7,UFD1,VCP			KEAP1-NFE2L2 pathway	16.4	0.462	4.629	AKT1,AKT2,AKT3,CDKN1A,CSNK2A1,CSNK2B,CUL3,EP300,FBXL17,GSK3B,MAP1LC3B,PSMA1,PSMA2,PSMA3,PSMA5,PSMA6,PSMA7,PSMB1,PSMB2,PSMB3,PSMB4,PSMB5,PSMB6,PSMB7,PSMC1,PSMC2,PSMC4,PSMC5,PSMC6,PSMD12,PSMD13,PSMD3,PSMD4,PSMD6,PSMD7,PSMD8,PSMD9,PSME2,PSME4,RPS27A,UBC,UFD1				KEAP1-NFE2L2 pathway	8.58	0.44	-3.479	AKT1,AKT2,AKT3,BACH1,BTRC,CDKN1A,CREBBP,CSNK2A1,CSNK2A2,CUL1,CUL3,EP300,FBXL17,GSK3B,KEAP1,MAFG,NFE2L2,PSMA1,PSMA7,PSMB10,PSMB4,PSMB7,PSMB8,PSMC3,PSMC6,PSMD1,PSMD11,PSMD12,PSMD2,PSMD3,PSMD4,PSMD6,PSMD9,PSME1,PSME4,SEM1,SQSTM1,UBC,UBXN7,VCP
66	RAR Activation	8.5	0.277	3.025	ACTB,ACVR2A,ADAM10,ADAM17,ADCY5,ADH1C,AKT3,ALDH1A1,ARID2,BMPR2,BRD7,CAMK2D,CARM1,CCNH,Cdc42,CDK7,CDKN1A,CDKN1B,CITED2,COL1A1,COL3A1,CREB1,CREB3,CREB3L2,CREB5,CREBBP,CSNK2A1,CSNK2A2,DHRS3,Eda,EP300,FNBP1,FOS,GDE1,GNAQ,GTF2H1,GUCY1A1,GUCY1B1,HIF1A,HOXA3,HOXB4,IL17D,IL33,IL3RA,IL6,JAK2,JUN,KAT2B,KLF2,LAMB1,MAP2K1,MAP2K4,MAPK1,MAPK14,MAPK3,MAPK8,MAPK9,MEIS2,MMP2,MMP3,MNAT1,NCOA1,NCOR1,NFATC1,NFKB1,NF…			RAR Activation	4.78	0.179	3.533	ACVR1,ADCY7,AKT1,AKT2,AKT3,ALDH1A1,ARID2,ATF2,BMPR2,CAMK2D,CCNH,CDKN1A,COL1A1,COL1A2,COL3A1,CREB3L1,CREB3L2,CREB5,CSK,CSNK2A1,CSNK2B,DHRS3,EP300,FABP5,FOS,GATA6,GDE1,GNB1,GTF2H5,GUCY1A1,HIF1A,HOXA3,IL33,JUN,KAT2B,KLF2,LAMB1,MAP2K1,MAPK3,MEIS2,MMP2,NR2F6,PBRM1,PDE1A,PDE5A,PDE6D,PHF10,PIK3C2A,PIK3R2,PRKAR1A,PRMT1,PSMC5,PTEN,RARG,RBP1,RBP4,RHOA,RHOBTB1,RHOC,RHOJ,RHOQ,RND3,RPL7A,SCAND1,SMAD3,SMAD4,SM…				RAR Activation	7.43	0.277	-3.575	ACVR1,ACVR2A,ADAM10,ADAM17,ADCY7,AKT1,AKT2,AKT3,ALDH1A1,ARID1A,ARID2,ATF2,ATF4,BMPR2,CAMK2D,CARM1,CCNH,CDKN1A,CDKN1B,CITED2,COL1A1,COL1A2,COL3A1,CREB1,CREB3,CREB3L1,CREB3L2,CREB5,CREBBP,CSNK2A1,CSNK2A2,DHRS3,Eda,EP300,FABP5,FNBP1,FOS,GATA6,GNA11,GNAQ,GTF2H1,GUCY1A1,HIF1A,HOXA3,IL33,IL3RA,JAK2,KAT2B,LAMB1,MAP2K1,MAP2K4,MAPK1,MAPK14,MAPK8,MED1,MEIS2,MMP2,MMP3,MNAT1,NCOA1,NCOR1,NCOR2,NFATC1,NFKB1,NF…
67	Thrombin Signaling	8.48	0.324	4.989	ADCY5,AKT3,ARHGEF1,ARHGEF10,ARHGEF11,ARHGEF12,ARHGEF25,ARHGEF28,ARHGEF6,CAMK1D,CAMK2D,Cdc42,CREB1,EGFR,FNBP1,GNA12,GNAI2,GNAI3,GNAO1,GNAQ,GNB4,GNG10,GNG11,GNG12,GNG5,GRB2,GUCY1A1,GUCY1B1,ITPR2,MAP2K1,MAPK1,MAPK14,MAPK3,MPRIP,MYL6,MYL9,NFKB1,NFKB2,NRAS,PDIA3,PDPK1,PIK3C2A,PIK3CA,PIK3R1,PIK3R2,PLCB1,PLCB4,PLCE1,PLCL1,PPP1CB,Ppp1r12b,PRKCA,PRKCE,PRKCI,PRKD1,PRKD3,PTK2,RALB,RAP1B,RAP2A,RAP2B,RELB,RHO…			Thrombin Signaling	5.87	0.222	2.795	ADCY7,AKT1,AKT2,AKT3,ARHGEF12,CAMK1D,CAMK2D,F2R,GATA6,GNA13,GNAS,GNB1,GNB2,GNB4,GNG10,GNG5,GUCY1A1,HRAS,ITPR1,MAP2K1,MAP2K2,MAPK3,MYL12A,MYL12B,MYL6,MYL9,PDIA3,PIK3C2A,PIK3R2,PLCB4,PLCL1,PPP1CB,PRKCA,PTK2,RAF1,RALB,RAP1A,RAP1B,RHOA,RHOBTB1,RHOC,RHOJ,RHOQ,RND3,ROCK1,ROCK2,RPS6KB1,RRAS,RRAS2,SHC1				Thrombin Signaling	11.8	0.369	-4.75	ADCY7,AKT1,AKT2,AKT3,ARHGEF1,ARHGEF10,ARHGEF11,ARHGEF12,ARHGEF2,ARHGEF25,ARHGEF28,ARHGEF40,ARHGEF6,CAMK1,CAMK1D,CAMK2D,CREB1,EGFR,F2R,FNBP1,GATA6,GNA11,GNA12,GNA13,GNAI1,GNAI2,GNAI3,GNAO1,GNAQ,GNAS,GNB4,GNG11,GNG12,GNG5,GRB2,GUCY1A1,ITPR1,ITPR2,KRAS,MAP2K1,MAPK1,MAPK14,MPRIP,MYL9,NFKB1,NFKB2,NRAS,PDIA3,PDPK1,PIK3C2A,PIK3CA,PLCB1,PLCE1,PLCL1,PPP1CB,PPP1R12A,Ppp1r12b,PRKCA,PRKCE,PRKCI,PTK2,RAC1,RAL…
68	ERK5 Signaling	8.48	0.459	2.959	CREB1,CREB3,CREB3L2,CREB5,CREBBP,EGFR,ELK4,FOS,FOXO3,GAB1,GNA12,GNAQ,IL6ST,MAP2K5,MAP3K2,MAP3K3,MAP3K8,MEF2A,MEF2D,MYC,NGF,NRAS,PTPN11,RALB,RAP1B,RAP2A,RAP2B,RPS6KA3,RPS6KB1,RRAS2,WNK1,YWHAB,YWHAE,YWHAG			ERK5 Signaling	6.7	0.338	3.128	AKT1,ATF2,BAD,CREB3L1,CREB3L2,CREB5,ELK4,FOS,GNA13,HRAS,IL6ST,MAP3K2,MEF2A,MEF2C,PTPN11,RALB,RAP1A,RAP1B,RPS6KB1,RRAS,RRAS2,YWHAE,YWHAH,YWHAQ,YWHAZ				ERK5 Signaling	12.1	0.541	-3.893	AKT1,ATF2,ATF4,CREB1,CREB3,CREB3L1,CREB3L2,CREB5,CREBBP,EGFR,ELK4,FOS,GAB1,GNA12,GNA13,GNAQ,IL6ST,KRAS,MAP2K5,MAP3K2,MAP3K3,MEF2A,MEF2C,MEF2D,NGF,NRAS,PTPN11,RALA,RALB,RAP1A,RAP1B,RAP2A,RAP2B,RPS6KB1,RRAS2,WNK1,YWHAB,YWHAE,YWHAG,YWHAQ
69	Prolactin Signaling	8.47	0.421	3	ABCC9,CREBBP,EP300,FOS,FYN,GRB2,JAK2,JUN,MAP2K1,MAPK1,MAPK3,MYC,NR3C1,NRAS,PDPK1,PIK3C2A,PIK3CA,PIK3R1,PIK3R2,PRKCA,PRKCE,PRKCI,PRKD1,PRKD3,PTPN11,RALB,RAP1B,RAP2A,RAP2B,RRAS2,SHC1,SOCS1,SOCS2,SOCS3,SOCS4,SOCS5,SOS2,SP1,STAT3,STAT5B			Prolactin Signaling	3.61	0.242	2.828	ABCC9,CEBPB,EP300,FOS,HRAS,JUN,KCNJ8,MAP2K1,MAP2K2,MAPK3,NR3C1,PIK3C2A,PIK3R2,PRKCA,PTPN11,RAF1,RALB,RAP1A,RAP1B,RRAS,RRAS2,SHC1,SOCS2				Prolactin Signaling	5.86	0.379	-2.556	CEBPB,CREBBP,EP300,FOS,GRB2,IRS1,JAK2,KCNJ8,KRAS,MAP2K1,MAPK1,NMI,NR3C1,NRAS,PDPK1,PIK3C2A,PIK3CA,PRKCA,PRKCE,PRKCI,PTPN11,RALA,RALB,RAP1A,RAP1B,RAP2A,RAP2B,RRAS2,SHC1,SOCS4,SOCS5,SOS1,SOS2,SP1,STAT3,STAT5B
70	Neuregulin Signaling	8.47	0.393	2.959	ADAM17,AKT3,CDKN1B,CRK,CRKL,DCN,EGFR,ERBB4,ERBIN,ERRFI1,GRB2,HSP90AA1,HSP90AB1,HSP90B1,ITGA1,ITGA5,ITGA9,ITGAV,ITGB1,ITGB5,ITGB8,MAP2K1,MAPK1,MAPK3,MYC,NRAS,PDPK1,PIK3R1,PIK3R2,PRKCA,PRKCE,PRKCI,PRKD1,PRKD3,PTPN11,RALB,RAP1B,RAP2A,RAP2B,RPS6,RPS6KB1,RRAS2,SHC1,SOS2,STAT5B,TMEFF2			Neuregulin Signaling	7.01	0.291	2.2	AKT1,AKT2,AKT3,BAD,CRK,DCN,ERBIN,ERRFI1,HBEGF,HRAS,HSP90AA1,HSP90AB1,HSP90B1,ITGA8,ITGAV,ITGB1,ITGB5,MAP2K1,MAP2K2,MAPK3,PIK3R2,PRKCA,PTEN,PTPN11,RAF1,RALB,RAP1A,RAP1B,RPS6,RPS6KB1,RRAS,RRAS2,SHC1,TMEFF2				Neuregulin Signaling	7.87	0.393	-3.43	ADAM17,AKT1,AKT2,AKT3,CDKN1B,CRK,CRKL,DCN,DLG4,EGFR,ERBIN,ERRFI1,GRB2,HBEGF,HSP90AA1,HSP90AB1,HSP90B1,ITGA1,ITGA9,ITGAV,ITGB1,ITGB5,ITGB8,KRAS,MAP2K1,MAPK1,NRAS,PDPK1,PRKCA,PRKCE,PRKCI,PSEN1,PTPN11,RALA,RALB,RAP1A,RAP1B,RAP2A,RAP2B,RPS6,RPS6KB1,RRAS2,SHC1,SOS1,SOS2,STAT5B
71	Insulin Receptor Signaling	8.45	0.371	2.661	AKT3,CRK,CRKL,EIF4EBP1,FOXO1,FOXO3,FYN,GAB1,GRB10,GRB2,GSK3B,INSR,IRS2,JAK1,JAK2,MAP2K1,MAPK1,MAPK3,MAPK8,NCK1,NRAS,OCRL,PDE3B,PDPK1,PIK3C2A,PIK3CA,PIK3R1,PIK3R2,PPP1CA,PPP1CB,Ppp1cc,PPP1R7,PRKACB,PRKAG1,PRKAG2,PRKCI,PTPN1,PTPN11,RALB,RAP1B,RAP2A,RAP2B,RAPGEF1,RHOQ,RPS6KB1,RRAS2,SHC1,SOCS3,SOS2,SYNJ1,SYNJ2,VAMP2			Insulin Receptor Signaling	5.95	0.257	3.307	AKT1,AKT2,AKT3,BAD,CRK,EIF4E,EIF4EBP1,GSK3B,HRAS,MAP2K1,MAP2K2,MAPK3,NCK1,PIK3C2A,PIK3R2,PPP1CA,PPP1CB,Ppp1cc,PPP1R10,PPP1R14A,PPP1R14B,PRKAR1A,PTEN,PTPN11,RAF1,RALB,RAP1A,RAP1B,RHOQ,RPS6KB1,RRAS,RRAS2,SHC1,STX4,TRIP10,VAMP2				Insulin Receptor Signaling	10.8	0.414	-2.94	ACLY,AKT1,AKT2,AKT3,CBL,CRK,CRKL,EIF4E,EIF4EBP1,GAB1,GRB10,GRB2,GSK3B,INSR,IRS1,IRS2,JAK1,JAK2,KRAS,MAP2K1,MAPK1,MAPK8,NCK1,NRAS,OCRL,PDE3B,PDPK1,PIK3C2A,PIK3CA,PPP1CA,PPP1CB,Ppp1cc,PPP1R10,PPP1R11,PPP1R12A,PPP1R7,PRKACA,PRKACB,PRKAG1,PRKAG2,PRKCI,PTPN1,PTPN11,RALA,RALB,RAP1A,RAP1B,RAP2A,RAP2B,RHOQ,RPS6KB1,RRAS2,SHC1,SOS1,SOS2,STX4,SYNJ2,VAMP2
72	Microautophagy Signaling Pathway	8.41	0.356	4.025	BAG6,CHMP2A,CHMP3,COL12A1,COL15A1,COL16A1,COL1A1,COL3A1,COL4A2,COL4A5,COL5A2,COL6A1,COL6A2,COL6A3,COL8A1,HSPA8,LAMP2,MAP1LC3B,PRKAG1,PRKAG2,PSMA6,PSMB4,PSMB7,PSMC1,PSMC3,PSMD1,PSMD11,PSMD12,PSMD13,PSMD2,PSMD3,PSMD4,PSMD7,PSMD8,PSME2,PSME4,RAB7A,RHOT1,SEC23A,SEC23B,SEC24A,SEC24B,SEC24C,SEC24D,SEC31A,SIDT2,SNF8,SQSTM1,STAM,STAM2,STX17,TP53,VPS36,VPS37A,VPS41,VPS4A,VPS4B			Microautophagy Signaling Pathway	16.2	0.362	6.03	BAG6,CHMP2A,CHMP4B,CHMP5,COL12A1,COL15A1,COL1A1,COL1A2,COL3A1,COL4A1,COL4A2,COL4A3,COL4A4,COL4A5,COL6A1,COL6A2,COL6A6,HSPA8,LAMP2,MAP1LC3A,MAP1LC3B,PSMA1,PSMA2,PSMA3,PSMA5,PSMA6,PSMA7,PSMB1,PSMB2,PSMB3,PSMB4,PSMB5,PSMB6,PSMB7,PSMC1,PSMC2,PSMC4,PSMC5,PSMC6,PSMD12,PSMD13,PSMD3,PSMD4,PSMD6,PSMD7,PSMD8,PSMD9,PSME2,PSME4,RAB7A,SEC23A,SEC24D,SNF8,TOMM20,TP53,TSG101,VPS28,VTA1				Microautophagy Signaling Pathway	6.48	0.338	-3.429	BAG6,CHMP3,COL1A1,COL1A2,COL3A1,COL4A5,COL4A6,COL5A1,COL6A1,COL6A2,COL8A1,DNM1L,MAP1LC3A,PRKAB2,PRKAG1,PRKAG2,PSMA1,PSMA7,PSMB10,PSMB4,PSMB7,PSMB8,PSMC3,PSMC6,PSMD1,PSMD11,PSMD12,PSMD2,PSMD3,PSMD4,PSMD6,PSMD9,PSME1,PSME4,RAB7A,RHOT1,SEC13,SEC23A,SEC24A,SEC24B,SEC24C,SEC24D,SEC31A,SIDT2,SQSTM1,STAM,STAM2,STX17,TP53,VPS28,VPS36,VPS41,VPS4B,VTA1
73	Interleukin-1 family signaling	8.38	0.38	3.857	BTRC,CHUK,CUL1,FBXW11,IL1R1,IL1RAP,IL33,IRAK1,IRAK3,MAP2K1,MAP2K4,MAP3K3,MAP3K8,MAPK8,MYD88,NFKB1,NFKBIA,NOD1,PELI1,PELI2,PSMA6,PSMB4,PSMB7,PSMC1,PSMC3,PSMD1,PSMD11,PSMD12,PSMD13,PSMD2,PSMD3,PSMD4,PSMD7,PSMD8,PSME2,PSME4,PTPN11,PTPN12,PTPN14,PTPN2,PTPN9,RIPK2,SEM1,SMAD3,SQSTM1,STAT3,TAB2,TBK1,UBC			Interleukin-1 family signaling	8.48	0.302	4.964	IL1R1,IL33,IRAK1,MAP2K1,PSMA1,PSMA2,PSMA3,PSMA5,PSMA6,PSMA7,PSMB1,PSMB2,PSMB3,PSMB4,PSMB5,PSMB6,PSMB7,PSMC1,PSMC2,PSMC4,PSMC5,PSMC6,PSMD12,PSMD13,PSMD3,PSMD4,PSMD6,PSMD7,PSMD8,PSMD9,PSME2,PSME4,PTPN11,PTPN12,RPS27A,SMAD3,UBC,UBE2N,UBE2V1				Interleukin-1 family signaling	7.77	0.38	-4.429	BTRC,CHUK,CUL1,FBXW11,IL1R1,IL1RAP,IL33,IRAK1,IRAK3,MAP2K1,MAP2K4,MAP3K3,MAPK8,NFKB1,NOD1,PSMA1,PSMA7,PSMB10,PSMB4,PSMB7,PSMB8,PSMC3,PSMC6,PSMD1,PSMD11,PSMD12,PSMD2,PSMD3,PSMD4,PSMD6,PSMD9,PSME1,PSME4,PTPN11,PTPN12,PTPN14,PTPN2,PTPN9,RELA,RIPK2,SEM1,SMAD3,SQSTM1,STAT3,TAB2,TBK1,UBC,UBE2N,UBE2V1
74	Signaling by PDGF	8.38	0.5	2.043	COL3A1,COL4A2,COL4A5,COL5A2,COL6A1,COL6A2,COL6A3,CRK,CRKL,FURIN,GRB2,NCK1,NRAS,PDGFD,PDGFRA,PDGFRB,PIK3CA,PIK3R1,PIK3R2,PTPN11,PTPN12,RAPGEF1,RASA1,STAT3,STAT5B,STAT6,THBS1,THBS2,THBS3			Signaling by PDGF	8.45	0.414	2.041	COL3A1,COL4A1,COL4A2,COL4A3,COL4A4,COL4A5,COL6A1,COL6A2,COL6A6,CRK,FURIN,HRAS,NCK1,PDGFA,PDGFD,PDGFRA,PIK3R2,PLAT,PTPN11,PTPN12,RASA1,STAT6,THBS2,THBS3				Signaling by PDGF	5.42	0.431	-3	COL3A1,COL4A5,COL5A1,COL6A1,COL6A2,CRK,CRKL,GRB2,KRAS,NCK1,NRAS,PDGFA,PDGFD,PDGFRB,PIK3CA,PTPN11,PTPN12,RASA1,SOS1,STAT3,STAT5B,STAT6,THBS1,THBS2,THBS3
75	Clathrin-mediated endocytosis	8.25	0.377	4.714	AAK1,ACTB,ACTG1,ACTR3,AGFG1,AP2A2,Ap2b1,ARFGAP1,ARPC2,ARPC5,CLTB,CLTC,CTTN,DNM1,DNM2,DNM3,EGFR,EPN1,EPN2,EPS15L1,FCHO2,FNBP1,FZD4,GAK,GAPVD1,GRB2,HIP1,HSPA8,ITSN1,ITSN2,NECAP2,OCRL,PACSIN2,PICALM,PIK3C2A,RAB5A,RAB5B,RAB5C,SGIP1,SH3GL1,SNX9,STAM,STAM2,STON1,SYNJ1,SYNJ2,SYT11,UBC,VAMP2			Clathrin-mediated endocytosis	5.83	0.262	4.116	ACTG1,ACTR2,ACTR3,AGFG1,AP2A1,AP2S1,ARPC2,ARPC3,ARPC4,ARPC5,CLTA,CLTB,CLTC,DNM1,EPN2,FCHO2,FZD4,HBEGF,HIP1,HSPA8,NECAP2,PICALM,PIK3C2A,RAB5A,RPS27A,SCARB2,SH3GL1,SNX18,TRIP10,UBC,VAMP2,VAMP4,VAMP7,WNT5A				Clathrin-mediated endocytosis	13.1	0.454	-4.557	AAK1,ACTG1,ACTR3,AGFG1,AP2A2,Ap2b1,AP2M1,ARPC2,ARPC4,ARPC5,ARRB1,BIN1,CBL,CLTB,CLTC,CTTN,DAB2,DNM2,DNM3,EGFR,EPN1,EPS15L1,FCHO2,FNBP1,FZD4,GAPVD1,GRB2,HBEGF,HIP1,IGF2R,ITSN1,ITSN2,M6PR,NECAP2,OCRL,PACSIN2,PICALM,PIK3C2A,RAB5A,RAB5B,RAB5C,REPS1,SGIP1,SH3GL1,SH3KBP1,SNX18,SNX9,STAM,STAM2,STON1,STON2,SYNJ2,SYT11,TF,UBC,VAMP2,VAMP4,VAMP7,WNT5A
76	Signaling by ROBO receptors	8.09	0.388	3.13	ABL1,ABL2,CAP1,CLASP1,CLASP2,COL4A5,CXCL12,DAG1,ELOC,LDB1,MYO9B,NCK1,NRP1,PAK2,PAK3,PFN1,PPP3CB,PRKACB,PRKCA,PSMA6,PSMB4,PSMB7,PSMC1,PSMC3,PSMD1,PSMD11,PSMD12,PSMD13,PSMD2,PSMD3,PSMD4,PSMD7,PSMD8,PSME2,PSME4,RHOA,ROBO1,SEM1,SLIT2,SLIT3,SOS2,SRGAP2,UBC,USP33,ZSWIM8			Signaling by ROBO receptors	14	0.388	5.814	ABL1,CLASP2,COL4A5,ELOC,NCK1,NRP1,NTN1,PAK3,PFN1,PFN2,PPP3CB,PRKCA,PSMA1,PSMA2,PSMA3,PSMA5,PSMA6,PSMA7,PSMB1,PSMB2,PSMB3,PSMB4,PSMB5,PSMB6,PSMB7,PSMC1,PSMC2,PSMC4,PSMC5,PSMC6,PSMD12,PSMD13,PSMD3,PSMD4,PSMD6,PSMD7,PSMD8,PSMD9,PSME2,PSME4,RHOA,RPS27A,SLIT3,UBC,VASP				Signaling by ROBO receptors	9.61	0.422	-3.857	ABL1,CAP1,CLASP1,CLASP2,COL4A5,CXCL12,DAG1,LDB1,MYO9B,NCK1,NRP1,PAK2,PAK3,PFN1,PFN2,PPP3CB,PRKACA,PRKACB,PRKCA,PSMA1,PSMA7,PSMB10,PSMB4,PSMB7,PSMB8,PSMC3,PSMC6,PSMD1,PSMD11,PSMD12,PSMD2,PSMD3,PSMD4,PSMD6,PSMD9,PSME1,PSME4,RAC1,ROBO1,SEM1,SLIT2,SLIT3,SOS1,SOS2,SRGAP2,UBC,USP33,VASP,ZSWIM8
77	Non-Small Cell Lung Cancer Signaling	8.06	0.415	2.449	ABL1,AKT3,CCND2,CCND3,EGFR,FHIT,FOXO3,GRB2,HDAC1,HDAC3,HDAC5,HDAC7,HDAC8,HDAC9,ITPR2,MAP2K1,MAPK1,MAPK3,NRAS,PA2G4,PDPK1,PIK3C2A,PIK3CA,PIK3R1,PIK3R2,PRKCA,RALB,RAP1B,RAP2A,RAP2B,RASSF1,RB1,RBL2,RRAS2,RXRA,SIN3A,SOS2,TFDP1,TP53			Non-Small Cell Lung Cancer Signaling	5.6	0.287	2.236	ABL1,AKT1,AKT2,AKT3,BAD,CCND2,CCND3,CDK4,HDAC2,HRAS,ITPR1,MAP2K1,MAP2K2,MAPK3,PA2G4,PIK3C2A,PIK3R2,PRKCA,RAF1,RALB,RAP1A,RAP1B,RASSF1,RRAS,RRAS2,TFDP1,TP53				Non-Small Cell Lung Cancer Signaling	8.65	0.436	-2.117	ABL1,AKT1,AKT2,AKT3,CCND2,CDK4,EGFR,FHIT,GRB2,HDAC1,HDAC3,HDAC4,HDAC5,HDAC7,HDAC8,ITPR1,ITPR2,KRAS,MAP2K1,MAPK1,NRAS,PA2G4,PDPK1,PIK3C2A,PIK3CA,PRKCA,RALA,RALB,RAP1A,RAP1B,RAP2A,RAP2B,RASSF1,RB1,RBL2,RRAS2,RXRA,SOS1,SOS2,TFDP1,TP53
78	DNA Methylation and Transcriptional Repression Signaling	8	0.408	3.528	ARID4B,CDK11A,CDK12,CDK13,CDK14,CDK16,CDK17,CDK19,CDK7,CDK8,CHD3,CHD4,DNMT3A,GADD45G,GATAD2A,GATAD2B,HDAC1,MBD1,MBD2,MECP2,MTA3,MYC,RB1,RBBP7,RBL2,SIN3A,SP1,TCF12,TCF20,TCF21,TCF25,TCF3,TCF4,TEAD1,TET2,TET3,TFAM,TFE3,TP53,ZEB1			DNA Methylation and Transcriptional Repression Signaling	3.4	0.235	4.359	ARID4B,CDK11A,CDK16,CDK4,CDK8,CDK9,CEBPB,CHD3,GADD45B,GADD45G,HDAC2,MBD1,MBD2,MBD3,MTA1,RBBP4,RBBP7,SAP18,SUDS3,TCF21,TCF4,TEAD1,TP53				DNA Methylation and Transcriptional Repression Signaling	8.01	0.418	-4.017	ARID4B,CDK11A,CDK12,CDK13,CDK14,CDK16,CDK17,CDK4,CDK8,CEBPB,CHD3,CHD4,DNMT3A,GADD45A,GADD45B,GADD45G,GATAD2A,GATAD2B,HDAC1,MBD2,MECP2,MTA3,RB1,RBBP7,RBL2,RELA,SAP18,SP1,SUDS3,TCF12,TCF20,TCF25,TCF3,TCF4,TEAD1,TET2,TET3,TFAM,TFE3,TP53,ZEB1
79	Acute Myeloid Leukemia Signaling	7.96	0.418	3.286	AKT3,BRAF,EIF4EBP1,GRB2,IDH1,IDH2,IDH3G,KITLG,MAP2K1,MAP2K4,MAP2K5,MAPK1,MAPK3,MYC,NFKB1,NFKB2,NRAS,PIK3C2A,PIK3CA,PIK3R1,PIK3R2,PIM1,RALB,RAP1B,RAP2A,RAP2B,RARA,RELB,RPS6KB1,RRAS2,RUNX1,SOS2,STAT3,STAT5B,TCF3,TCF4,TCF7L1,TCF7L2			Acute Myeloid Leukemia Signaling	3.47	0.242	2.524	AKT1,AKT2,AKT3,BAD,EIF4EBP1,HRAS,IDH1,IDH2,MAP2K1,MAP2K2,MAP2K3,MAPK3,PIK3C2A,PIK3R2,RAF1,RALB,RAP1A,RAP1B,RPS6KB1,RRAS,RRAS2,TCF4				Acute Myeloid Leukemia Signaling	11.1	0.484	-3.55	AKT1,AKT2,AKT3,ARAF,BRAF,EIF4EBP1,FLT3LG,GRB2,IDH2,IDH3B,IDH3G,JUP,KRAS,MAP2K1,MAP2K3,MAP2K4,MAP2K5,MAPK1,NFKB1,NFKB2,NRAS,PIK3C2A,PIK3CA,RALA,RALB,RAP1A,RAP1B,RAP2A,RAP2B,RARA,REL,RELA,RELB,RPS6KB1,RRAS2,RUNX1,SOS1,SOS2,STAT3,STAT5B,TCF3,TCF4,TCF7L1,TCF7L2
80	Protein ubiquitination	7.93	0.633	2.065	OTULIN,UBA1,UBA6,UBC,UBE2A,UBE2B,UBE2D1,UBE2G1,UBE2G2,UBE2H,UBE2K,UBE2L3,UBE2Q2,UBE2R2,UBE2S,UBE2W,UBE2Z,USP7,USP9X			Protein ubiquitination	6.83	0.5	2.84	RPS27A,UBA1,UBC,UBE2A,UBE2B,UBE2D2,UBE2E1,UBE2E3,UBE2G1,UBE2K,UBE2Q2,UBE2S,UBE2W,USP7,USP9X				Protein ubiquitination	7.62	0.633	-2.982	OTULIN,UBA1,UBC,UBE2B,UBE2D1,UBE2D2,UBE2E3,UBE2G1,UBE2H,UBE2K,UBE2L3,UBE2Q2,UBE2R2,UBE2S,UBE2W,UBE2Z,UCHL3,USP7,USP9X
81	P2Y Purinergic Receptor Signaling Pathway	7.87	0.368	2.469	ADCY5,AKT3,CREB1,CREB3,CREB3L2,CREB5,CREBBP,FOS,GNAI2,GNAI3,GNAQ,GNB4,GNG10,GNG11,GNG12,GNG5,GUCY1A1,GUCY1B1,JUN,MAP2K1,MAPK1,MAPK3,MYC,NFKB1,NFKB2,NRAS,PDIA3,PIK3C2A,PIK3CA,PIK3R1,PIK3R2,PLCB1,PLCB4,PLCE1,PLCL1,PRKACB,PRKAG1,PRKAG2,PRKCA,PRKCE,PRKCI,PRKD1,PRKD3,RALB,RAP1B,RAP2A,RAP2B,RELB,RRAS2			P2Y Purinergic Receptor Signaling Pathway	5.15	0.248	2.502	ADCY7,AKT1,AKT2,AKT3,ATF2,CREB3L1,CREB3L2,CREB5,FOS,GNB1,GNB2,GNB4,GNG10,GNG5,GUCY1A1,HRAS,JUN,MAP2K1,MAP2K2,MAPK3,PDIA3,PIK3C2A,PIK3R2,PLCB4,PLCL1,PRKAR1A,PRKCA,RAF1,RALB,RAP1A,RAP1B,RRAS,RRAS2				P2Y Purinergic Receptor Signaling Pathway	8.22	0.383	-3.015	ADCY7,AKT1,AKT2,AKT3,ATF2,ATF4,CREB1,CREB3,CREB3L1,CREB3L2,CREB5,CREBBP,FOS,GNAI1,GNAI2,GNAI3,GNAQ,GNB4,GNG11,GNG12,GNG5,GUCY1A1,KRAS,MAP2K1,MAPK1,NFKB1,NFKB2,NRAS,PDIA3,PIK3C2A,PIK3CA,PLCB1,PLCE1,PLCL1,PRKACA,PRKACB,PRKAG1,PRKAG2,PRKCA,PRKCE,PRKCI,RALA,RALB,RAP1A,RAP1B,RAP2A,RAP2B,REL,RELA,RELB,RRAS2
82	RNA Polymerase II Transcription	7.85	0.356	3.159	AFF4,CASC3,CCNH,CCNT1,CCNT2,CDC40,CDC73,CDK7,CPSF2,CPSF3,CPSF6,CPSF7,CSTF3,CTR9,ELOA,ELOC,FYTTD1,GTF2A1,GTF2H1,IWS1,MAGOH,MLLT3,MNAT1,PABPN1,PAF1,PAPOLA,POLDIP3,POLR2A,POLR2D,RBM8A,RNGTT,RNPS1,RTF1,SLU7,SRSF1,SRSF11,SRSF2,SRSF7,SSRP1,SUPT5H,SUPT6H,TAF1,TAF13,TAF15,TAF3,TAF7,TCEA1,THOC1,THOC2,THOC7,U2AF2,UPF3B,WDR33			RNA Polymerase II Transcription	5.7	0.248	3.781	AFF4,CCNH,CCNT2,CDC40,CDK9,CPSF6,EIF4A3,ELOC,FYTTD1,GTF2A2,GTF2B,GTF2H5,MAGOH,NUDT21,PABPN1,POLR2A,POLR2C,POLR2F,POLR2G,POLR2H,POLR2J,POLR2K,RBM8A,RTF1,SARNP,SNRPB,SNRPD3,SRSF1,SRSF11,SRSF2,SRSF3,SRSF9,SUPT4H1,TAF10,TAF11,TAF13,THOC1				RNA Polymerase II Transcription	13.9	0.443	-5.416	AFF4,CASC3,CCNH,CCNT1,CCNT2,CDC40,CDC73,CPSF3,CPSF6,CSTF3,CTR9,DDX39B,EIF4A3,ELOA,FYTTD1,GTF2A1,GTF2B,GTF2F1,GTF2H1,IWS1,MAGOH,MAGOHB,MLLT3,MNAT1,NCBP2,NELFB,NELFE,NUDT21,PABPN1,PAF1,PAPOLA,PCF11,POLDIP3,POLR2A,POLR2E,RNGTT,RNPS1,RTF1,SARNP,SLBP,SLU7,SNRPB,SRSF1,SRSF11,SRSF2,SRSF3,SRSF4,SRSF6,SRSF7,SRSF9,SSRP1,SUPT16H,SUPT5H,SUPT6H,TAF1,TAF10,TAF11,TAF12,TAF13,TAF15,TAF3,TAF4B,TAF7,THOC7,U2AF2,WD…
83	Paxillin Signaling	7.77	0.393	3.124	ACTA2,ACTB,ACTG1,ACTN1,ACTN4,ARHGEF6,CRK,DOCK1,GIT2,GRB2,ITGA1,ITGA5,ITGA9,ITGAV,ITGB1,ITGB5,ITGB8,MAP2K4,MAPK1,MAPK14,MAPK8,MAPK9,NCK1,NRAS,PAK2,PAK3,PARVA,PIK3C2A,PIK3CA,PIK3R1,PIK3R2,PTK2,PTPN12,PXN,RALB,RAP1B,RAP2A,RAP2B,RRAS2,SOS2,TLN1,TLN2			Paxillin Signaling	3.22	0.224	2.4	ACTA2,ACTG1,ACTN1,ACTN4,ARFIP2,CRK,CSK,HRAS,ITGA8,ITGAV,ITGB1,ITGB5,NCK1,PAK3,PIK3C2A,PIK3R2,PTK2,PTPN12,PXN,RALB,RAP1A,RAP1B,RRAS,RRAS2				Paxillin Signaling	8.81	0.421	-3.162	ACTA2,ACTG1,ACTN1,ACTN4,ARF1,ARFIP2,ARHGEF6,CRK,DOCK1,GIT2,GRB2,ITGA1,ITGA9,ITGAV,ITGB1,ITGB5,ITGB8,KRAS,MAP2K4,MAPK1,MAPK14,MAPK8,NCK1,NRAS,PAK2,PAK3,PARVA,PIK3C2A,PIK3CA,PTK2,PTPN12,PXN,RAC1,RALA,RALB,RAP1A,RAP1B,RAP2A,RAP2B,RRAS2,SOS1,SOS2,TLN1,TLN2,VCL
84	Ovarian Cancer Signaling	7.74	0.348	2.646	ABL1,AKT3,APC,AXIN1,BCL2,BRAF,EDNRA,EGFR,FZD1,FZD2,FZD4,GJA1,GSK3B,HDAC1,HDAC3,HDAC5,HDAC7,HDAC8,HDAC9,MAP2K1,MAPK1,MAPK3,MMP2,NRAS,PA2G4,PIK3C2A,PIK3CA,PIK3R1,PIK3R2,PRKACB,PRKAG1,PRKAG2,PTGS1,PTGS2,RALB,RAP1B,RAP2A,RAP2B,RB1,RBL2,RPS6KB1,RRAS2,SIN3A,SMO,TCF3,TCF4,TCF7L1,TCF7L2,TFDP1,TP53,VEGFA,VEGFB,VEGFC,VEGFD,WNT9A			Ovarian Cancer Signaling	4.28	0.222	3.273	ABL1,AKT1,AKT2,AKT3,APC,CDK4,CTNNB1,FZD2,FZD4,GSK3B,HDAC2,HRAS,MAP2K1,MAP2K2,MAPK3,MMP2,PA2G4,PIK3C2A,PIK3R2,PRKAR1A,PTEN,PTGS1,RAF1,RALB,RAP1A,RAP1B,RPS6KB1,RRAS,RRAS2,TCF4,TFDP1,TP53,VEGFB,VEGFD,WNT5A				Ovarian Cancer Signaling	7.52	0.354	-3.286	ABL1,AKT1,AKT2,AKT3,APC,ARRB1,BCL2,BRAF,CD44,CDK4,CTNNB1,EGFR,FZD2,FZD4,FZD7,GSK3B,HDAC1,HDAC3,HDAC4,HDAC5,HDAC7,HDAC8,KRAS,MAP2K1,MAPK1,MMP2,NRAS,PA2G4,PIK3C2A,PIK3CA,PRKACA,PRKACB,PRKAG1,PRKAG2,RALA,RALB,RAP1A,RAP1B,RAP2A,RAP2B,RB1,RBL2,RPS6KB1,RRAS2,SMO,TCF3,TCF4,TCF7L1,TCF7L2,TFDP1,TP53,VEGFB,VEGFC,VEGFD,WNT5A,WNT9A
85	Glioblastoma Multiforme Signaling	7.66	0.339	2.496	AKT3,APC,AXIN1,CCND2,CCND3,Cdc42,CDKN1A,CDKN1B,EGFR,FNBP1,FOXO1,FZD1,FZD2,FZD4,GRB2,GSK3B,IGF1,IGF1R,ITPR2,MAP2K1,MAPK1,MAPK3,MYC,NF1,NF2,NRAS,PDGFD,PDGFRA,PDGFRB,PDIA3,PIK3C2A,PIK3CA,PIK3R1,PIK3R2,PLCB1,PLCB4,PLCE1,PLCL1,RALB,RAP1B,RAP2A,RAP2B,RB1,RHOA,RHOB,RHOC,RHOJ,RHOQ,RHOT1,RPS6KB1,RRAS2,SHC1,SHC2,SMO,SOS2,TCF3,TP53,WNT9A			Glioblastoma Multiforme Signaling	6.24	0.246	2.137	AKT1,AKT2,AKT3,APC,CCND2,CCND3,CDK4,CDKN1A,CTNNB1,FZD2,FZD4,GSK3B,HRAS,ITPR1,MAP2K1,MAP2K2,MAPK3,PDGFA,PDGFD,PDGFRA,PDIA3,PIK3C2A,PIK3R2,PLCB4,PLCL1,PTEN,RAF1,RALB,RAP1A,RAP1B,RHOA,RHOBTB1,RHOC,RHOJ,RHOQ,RND3,RPS6KB1,RRAS,RRAS2,SHC1,TP53,WNT5A				Glioblastoma Multiforme Signaling	7.4	0.345	-3.101	AKT1,AKT2,AKT3,APC,CCND2,CDK4,CDKN1A,CDKN1B,CTNNB1,EGFR,FNBP1,FZD2,FZD4,FZD7,GRB2,GSK3B,IGF1R,ITPR1,ITPR2,KRAS,MAP2K1,MAPK1,NF1,NF2,NRAS,PDGFA,PDGFD,PDGFRB,PDIA3,PIK3C2A,PIK3CA,PLCB1,PLCE1,PLCL1,RAC1,RALA,RALB,RAP1A,RAP1B,RAP2A,RAP2B,RB1,RHOB,RHOJ,RHOQ,RHOT1,RHOU,RND3,RPS6KB1,RRAS2,SHC1,SHC2,SMO,SOS1,SOS2,TCF3,TP53,WNT5A,WNT9A
86	TGF-Œ≤ Signaling	7.6	0.402	2.401	ACVR2A,BCL2,BMP4,BMPR1A,BMPR2,CREBBP,EP300,FOS,GRB2,HDAC1,INHBA,JUN,MAP2K1,MAP2K4,MAPK1,MAPK14,MAPK3,MAPK8,MAPK9,NRAS,PMEPA1,RALB,RAP1B,RAP2A,RAP2B,RNF111,RRAS2,SERPINE1,SMAD1,SMAD3,SMAD4,SMAD5,SMAD7,SMURF1,SMURF2,SOS2,TFE3,TGFB2,TGFBR2			TGF-Œ≤ Signaling	4.82	0.268	2.6	ACVR1,BMPR1A,BMPR2,EP300,FOS,HRAS,JUN,MAP2K1,MAP2K2,MAP2K3,MAPK3,PMEPA1,RAF1,RALB,RAP1A,RAP1B,RRAS,RRAS2,SERPINE1,SMAD3,SMAD4,SMAD7,TGFB1,TGFB2,TGFB3,TGFBR1				TGF-Œ≤ Signaling	11.2	0.474	-3.683	ACVR1,ACVR2A,BCL2,BMP4,BMPR1A,BMPR2,CREBBP,EP300,FOS,GRB2,HDAC1,INHBA,KRAS,MAP2K1,MAP2K3,MAP2K4,MAPK1,MAPK14,MAPK8,NRAS,RALA,RALB,RAP1A,RAP1B,RAP2A,RAP2B,RNF111,RRAS2,SERPINE1,SKI,SMAD1,SMAD3,SMAD4,SMAD5,SMAD7,SMURF1,SMURF2,SOS1,SOS2,TFE3,TGFB2,TGFB3,TGFBR2,TGIF1,ZFYVE9,ZNF423
87	Cytoprotection by HMOX1	7.54	0.468	2.414	ABCC1,BACH1,BLVRB,CARM1,CHD9,COX16,COX4I1,COX5A,COX6B1,COX7A2L,COX8A,CREBBP,CYCS,HDAC3,HM13,HMOX1,HMOX2,NCOA1,NCOA2,NCOR1,NDUFA4,NFE2L2,RXRA,SIN3A,SIN3B,STAT3,TBL1X,TBL1XR1,TXNIP			Cytoprotection by HMOX1	2.55	0.242	2.84	BLVRA,BLVRB,COX16,COX19,COX20,COX4I1,COX5A,COX7A2L,COX8A,CYCS,HM13,HMOX2,SIN3B,SURF1,TBL1XR1				Cytoprotection by HMOX1	7.13	0.468	-3.528	BACH1,BLVRB,CARM1,CHD9,COX16,COX20,COX6B1,COX7A2L,COX7B,COX8A,CREBBP,HDAC3,HELZ2,HM13,HMOX1,HMOX2,MED1,NCOA1,NCOA2,NCOR1,NCOR2,NDUFA4,NFE2L2,RXRA,STAT3,TBL1X,TBL1XR1,TGS1,TXNIP
88	Transcriptional Regulatory Network in Embryonic Stem Cells	7.53	0.341	3.474	ACVR2A,AKT3,BMP4,BMPR1A,BMPR2,CDYL,FGF2,FGFR1,FGFR2,FOXC1,FZD1,FZD2,FZD4,GSK3B,IGF1,IGF1R,IL6ST,INHBA,JAK1,JAK2,KAT6A,KLF4,LIFR,MAP2K1,MAPK1,MAPK3,MYC,NRAS,PIK3C2A,PIK3CA,PIK3R1,PIK3R2,RALB,RAP1B,RAP2A,RAP2B,REST,RIF1,RRAS2,SET,SMAD1,SMAD3,SMAD4,SMAD5,SMARCAD1,SMO,STAT3,TCF3,TCF7L1,TGFB2,TGFBR2,TGFBR3,TP53,TRIM24,WNT9A,ZFHX3			Transcriptional Regulatory Network in Embryonic Stem Cells	5.47	0.238	3.042	ACVR1,AKT1,AKT2,AKT3,BMPR1A,BMPR2,CTNNB1,FGFR1,FGFR2,FGFRL1,FOXC1,FZD2,FZD4,GATA6,GSK3B,HRAS,IL6ST,KLF4,MAP2K1,MAP2K2,MAPK3,PIK3C2A,PIK3R2,RALB,RAP1A,RAP1B,RRAS,RRAS2,SET,SKIL,SMAD3,SMAD4,TGFB1,TGFB2,TGFB3,TGFBR1,TGFBR3,TP53,WNT5A				Transcriptional Regulatory Network in Embryonic Stem Cells	9.54	0.378	-3.556	ACVR1,ACVR2A,AKT1,AKT2,AKT3,BMP4,BMPR1A,BMPR2,CDYL,CTNNB1,FGF2,FGFR1,FGFR2,FGFRL1,FZD2,FZD4,FZD7,GATA6,GSK3B,IGF1R,IGF2R,IL6ST,INHBA,JAK1,JAK2,KAT6A,KLF4,KRAS,LIFR,MAP2K1,MAPK1,NRAS,PIK3C2A,PIK3CA,RALA,RALB,RAP1A,RAP1B,RAP2A,RAP2B,REST,RIF1,RRAS2,SET,SKIL,SMAD1,SMAD3,SMAD4,SMAD5,SMARCAD1,SMO,STAT3,TCF3,TCF7L1,TGFB2,TGFB3,TGFBR2,TP53,TRIM24,WNT5A,WNT9A,ZFHX3
89	Renin-Angiotensin Signaling	7.43	0.372	4.427	ACE,ADCY5,FOS,GNAQ,GRB2,GUCY1A1,GUCY1B1,ITPR2,JAK2,JUN,MAP2K1,MAP2K4,MAPK1,MAPK14,MAPK3,MAPK8,MAPK9,NFKB1,NFKB2,NRAS,PAK2,PAK3,PIK3C2A,PIK3CA,PIK3R1,PIK3R2,PRKACB,PRKAG1,PRKAG2,PRKCA,PRKCE,PRKCI,PRKD1,PRKD3,PTK2,RALB,RAP1B,RAP2A,RAP2B,RELB,RRAS2,SHC1,SHC2,SOS2,STAT3			Renin-Angiotensin Signaling	2.14	0.19	3.273	ADCY7,ATF2,FOS,GUCY1A1,HRAS,ITPR1,JUN,MAP2K1,MAP2K2,MAPK3,PAK3,PIK3C2A,PIK3R2,PRKAR1A,PRKCA,PTK2,RAF1,RALB,RAP1A,RAP1B,RRAS,RRAS2,SHC1				Renin-Angiotensin Signaling	7.35	0.38	-3.904	ADCY7,ATF2,FOS,GNAQ,GRB2,GUCY1A1,ITPR1,ITPR2,JAK2,KRAS,MAP2K1,MAP2K4,MAPK1,MAPK14,MAPK8,NFKB1,NFKB2,NRAS,PAK2,PAK3,PIK3C2A,PIK3CA,PRKACA,PRKACB,PRKAG1,PRKAG2,PRKCA,PRKCE,PRKCI,PTK2,RAC1,RALA,RALB,RAP1A,RAP1B,RAP2A,RAP2B,REL,RELA,RELB,RRAS2,SHC1,SHC2,SOS1,SOS2,STAT3
90	Adrenomedullin signaling pathway	7.37	0.322	4.131	ADCY5,ADM,AKT3,ARNT,BCL2,BRAF,C3,Calm1 (includes others),CFH,FOS,GNAQ,GRB2,GSK3B,GUCY1A1,GUCY1A2,GUCY1B1,HIF1A,IL33,ITPR2,MAP2K1,MAP2K4,MAP2K5,MAPK1,MAPK14,MAPK3,MAPK6,MAPK8,MAPK9,MAX,MMP2,NFKB1,NFKB2,NPR1,NPR2,NPR3,NRAS,NT5C,PDIA3,PIK3C2A,PIK3CA,PIK3R1,PIK3R2,PLCB1,PLCB4,PLCE1,PLCL1,PRKACB,PRKAG1,PRKAG2,PRKG1,PTK2,RALB,RAMP2,RAP1B,RAP2A,RAP2B,RELB,RRAS2,RXRA,SHC1,SHC2,SLC39A7,SMARCC2,SOS2			Adrenomedullin signaling pathway	4.47	0.211	2.846	ADCY7,ADM,AKT1,AKT2,AKT3,BAD,BAX,Calm1 (includes others),CEBPB,CFH,CSK,FOS,GNAS,GSK3B,GUCY1A1,HIF1A,HRAS,IL33,ITPR1,MAP2K1,MAP2K2,MAP2K3,MAPK3,MAX,MMP2,NPR2,NT5C,PDIA3,PIK3C2A,PIK3R2,PLCB4,PLCL1,PRKAR1A,PTK2,RAF1,RALB,RAP1A,RAP1B,RRAS,RRAS2,SHC1,SLC39A7				Adrenomedullin signaling pathway	8.22	0.342	-4	ADCY7,ADM,AKT1,AKT2,AKT3,ARAF,ARNT,BCL2,BRAF,C3,Calm1 (includes others),CEBPB,CFH,FOS,GNA11,GNAQ,GNAS,GRB2,GSK3B,GUCY1A1,GUCY1A2,HIF1A,IL33,ITPR1,ITPR2,KRAS,MAP2K1,MAP2K3,MAP2K4,MAP2K5,MAPK1,MAPK14,MAPK6,MAPK8,MMP2,NFKB1,NFKB2,NPR2,NRAS,PDIA3,PIK3C2A,PIK3CA,PLCB1,PLCE1,PLCL1,PRKACA,PRKACB,PRKAG1,PRKAG2,PRKG1,PTK2,RALA,RALB,RAP1A,RAP1B,RAP2A,RAP2B,REL,RELA,RELB,RRAS2,RXRA,SHC1,SHC2,SLC39A7,SMARCC2…
91	TCF dependent signaling in response to WNT	7.37	0.322	2.75	APC,AXIN1,BTRC,CDC73,CHD8,CREBBP,CSNK1A1,CSNK1E,CSNK2A1,CSNK2A2,CUL3,EP300,FZD1,FZD2,FZD4,GSK3B,HDAC1,LGR4,LRP5,LRP6,MYC,PPP2CA,PPP2CB,PPP2R5A,PPP2R5E,PSMA6,PSMB4,PSMB7,PSMC1,PSMC3,PSMD1,PSMD11,PSMD12,PSMD13,PSMD2,PSMD3,PSMD4,PSMD7,PSMD8,PSME2,PSME4,RNF146,RSPO3,RYK,SEM1,SFRP1,SFRP2,SMARCA4,SMURF2,SOST,SOX4,SOX9,TCF4,TCF7L1,TCF7L2,TLE1,TNKS,TNKS2,UBC,USP34,USP8,WNT9A,XIAP,ZNRF3			TCF dependent signaling in response to WNT	13.1	0.307	6.018	AKT1,AKT2,APC,CAV1,CSNK1A1,CSNK1E,CSNK2A1,CSNK2B,CTBP1,CTNNB1,CUL3,DACT1,EP300,FZD2,FZD4,GSK3B,PPP2CA,PSMA1,PSMA2,PSMA3,PSMA5,PSMA6,PSMA7,PSMB1,PSMB2,PSMB3,PSMB4,PSMB5,PSMB6,PSMB7,PSMC1,PSMC2,PSMC4,PSMC5,PSMC6,PSMD12,PSMD13,PSMD3,PSMD4,PSMD6,PSMD7,PSMD8,PSMD9,PSME2,PSME4,RNF146,RPS27A,RYK,SFRP2,SOST,TCF4,TLE1,TLE3,TLE5,TNKS,UBC,USP34,USP8,WNT5A,XIAP,YWHAZ				TCF dependent signaling in response to WNT	10.4	0.367	-5.735	AKT1,AKT2,APC,BCL9L,BTRC,CBY1,CDC73,CHD8,CREBBP,CSNK1A1,CSNK1E,CSNK1G2,CSNK2A1,CSNK2A2,CTBP1,CTNNB1,CUL3,DACT1,EP300,FZD2,FZD4,GSK3B,HDAC1,KMT2D,LRP6,PPP2CA,PPP2CB,PPP2R1A,PPP2R5A,PPP2R5E,PSMA1,PSMA7,PSMB10,PSMB4,PSMB7,PSMB8,PSMC3,PSMC6,PSMD1,PSMD11,PSMD12,PSMD2,PSMD3,PSMD4,PSMD6,PSMD9,PSME1,PSME4,RNF146,RUVBL1,RYK,SEM1,SFRP1,SFRP2,SMARCA4,SMURF2,SOX4,SOX6,SOX9,TCF4,TCF7L1,TCF7L2,TNKS,TNKS2,TRRAP…
92	Thrombopoietin Signaling	7.35	0.46	2.414	FOS,GAB2,GRB2,IRS2,JAK2,JUN,MAP2K1,MAPK1,MAPK3,MYC,NRAS,PIK3C2A,PIK3CA,PIK3R1,PIK3R2,PRKCA,PRKCE,PRKCI,PRKD1,PRKD3,PTPN11,RALB,RAP1B,RAP2A,RAP2B,RRAS2,SHC1,STAT3,STAT5B			Thrombopoietin Signaling	3.91	0.286	3.3	FOS,GAB2,HRAS,JUN,MAP2K1,MAP2K2,MAPK3,PIK3C2A,PIK3R2,PRKCA,PTPN11,RAF1,RALB,RAP1A,RAP1B,RRAS,RRAS2,SHC1				Thrombopoietin Signaling	5.19	0.413	-3.53	FOS,GAB2,GRB2,IRS2,JAK2,KRAS,MAP2K1,MAPK1,NRAS,PIK3C2A,PIK3CA,PRKCA,PRKCE,PRKCI,PTPN11,RALA,RALB,RAP1A,RAP1B,RAP2A,RAP2B,RRAS2,SHC1,SOS1,STAT3,STAT5B
93	Synaptogenesis Signaling Pathway	7.24	0.286	5.674	ACTR3,ADCY5,AFDN,AKT3,AP2A2,Ap2b1,ARPC1B,ARPC2,ARPC5,BET1L,BRAF,Calm1 (includes others),CAMK2D,CDH11,CDH13,CLASP2,COMP,CREB1,CREB3,CREB3L2,CREB5,CREBBP,CRK,CRKL,CTNND1,DNAJC5,EFNA5,EIF4EBP1,EIF4EBP2,EPHA3,FARP1,FYN,GRB2,GRIA4,GSK3B,GUCY1A1,GUCY1B1,HSPA8,ITSN1,ITSN2,KALRN,LRP1,MAPK1,MAPK14,MAPK3,NAP1L1,NAPA,NECTIN3,NLGN2,NRAS,NSF,NTRK2,PAFAH1B1,PIK3C2A,PIK3CA,PIK3R1,PIK3R2,PRKACB,PRKAG1,PRKAG2,PRK…			Synaptogenesis Signaling Pathway	5.54	0.2	4.557	ACTR2,ACTR3,ADCY7,AKT1,AKT2,AKT3,AP2A1,AP2S1,APOE,ARPC1B,ARPC2,ARPC3,ARPC4,ARPC5,ARPC5L,ATF2,BAD,Calm1 (includes others),CAMK2D,CFL1,CLASP2,COMP,CREB3L1,CREB3L2,CREB5,CRK,CTNNB1,CTNND1,EIF4EBP1,EIF4EBP2,GPAA1,GRIA4,GRINA,GSK3B,GUCY1A1,HRAS,HSPA8,ITPR1,LRP1,MAPK3,NAPA,NECTIN3,PIK3C2A,PIK3R2,PRKAR1A,RAB3A,RAB5A,RAF1,RALB,RAP1A,RAP1B,RASGRP2,RHOA,RPS6KB1,RRAS,RRAS2,SGTA,SHC1,STXBP3,SYN3,THBS2,THBS3,…				Synaptogenesis Signaling Pathway	8.96	0.311	-5.618	ACTR3,ADCY7,AKT1,AKT2,AKT3,AP2A2,Ap2b1,AP2M1,APOE,ARPC1B,ARPC2,ARPC4,ARPC5,ATF2,ATF4,BET1L,BRAF,CACNA2D1,Calm1 (includes others),CAMK2D,CDH11,CFL1,CLASP2,CREB1,CREB3,CREB3L1,CREB3L2,CREB5,CREBBP,CRK,CRKL,CTNNB1,CTNND1,DLG4,DNAJC5,EFNA5,EIF4EBP1,EIF4EBP2,EPHA7,FARP1,GOSR2,GRB2,GRIA3,GRIA4,GSK3B,GUCY1A1,ITPR1,ITSN1,ITSN2,KALRN,KRAS,MAPK1,MAPK14,NAP1L1,NAP1L4,NECTIN3,NLGN2,NRAS,NSF,NTRK2,PAFAH1B1,PI…
94	Regulation of lipid metabolism by PPARalpha	7.2	0.37	3.452	ABCA1,ACOX1,ALAS1,ANGPTL4,ARNT,CARM1,CDK19,CDK8,CHD9,CPT1A,CREBBP,EP300,FADS1,FAM120B,GPS2,HDAC3,HMGCS2,ME1,MED13,MED13L,MED14,MED15,MED31,MED6,NCOA1,NCOA2,NCOA3,NCOR1,NFYB,NFYC,NPAS2,NR1D1,NRF1,RGL1,RORA,RXRA,SIN3A,SIN3B,SP1,TBL1X,TBL1XR1,THRAP3,TIAM2,TXNRD1			Regulation of lipid metabolism by PPARalpha	2.23	0.193	2.985	ANGPTL4,CCNC,CDK8,EP300,G0S2,HMGCS2,ME1,MED10,MED13,MED13L,MED14,MED21,MED25,MED30,MED31,MED6,NPAS2,NR1D1,NR1H2,SIN3B,TBL1XR1,THRAP3,TXNRD1				Regulation of lipid metabolism by PPARalpha	9.15	0.412	-2.897	ABCA1,ACOX1,ALAS1,ANGPTL4,ARNT,CARM1,CCNC,CDK8,CHD9,CPT1A,CREBBP,EP300,FADS1,FAM120B,GPS2,HDAC3,HELZ2,HMGCS1,HMGCS2,ME1,MED1,MED10,MED13,MED14,MED6,MED8,NCOA1,NCOA2,NCOA3,NCOR1,NCOR2,NFYB,NFYC,NPAS2,NR1D1,NR1H2,NRF1,PLIN2,RGL1,RORA,RXRA,SLC27A1,SP1,TBL1X,TBL1XR1,TGS1,THRAP3,TIAM2,TXNRD1
95	Endocannabinoid Developing Neuron Pathway	7.18	0.362	2.466	ADCY5,AKT1S1,AKT3,BRAF,CDKN1B,CREB1,CREB3,CREB3L2,CREB5,CREBBP,GNAI2,GNAI3,GNAO1,GNB4,GNG10,GNG11,GNG12,GNG5,GSK3B,GUCY1A1,GUCY1B1,MAP2K1,MAP2K4,MAP2K5,MAPK1,MAPK14,MAPK3,MAPK6,MAPK8,MAPK9,MGLL,NRAS,PIK3C2A,PIK3CA,PIK3R1,PIK3R2,PRKACB,PRKAG1,PRKAG2,RALB,RAP1B,RAP2A,RAP2B,RHOA,RRAS2,STAT3			Endocannabinoid Developing Neuron Pathway	4.72	0.244	2.449	ADCY7,AKT1,AKT2,AKT3,ATF2,CREB3L1,CREB3L2,CREB5,CTNNB1,GNB1,GNB2,GNB4,GNG10,GNG5,GSK3B,GUCY1A1,HRAS,MAP2K1,MAP2K2,MAP2K3,MAPK3,PIK3C2A,PIK3R2,PRKAR1A,RAF1,RALB,RAP1A,RAP1B,RHOA,RRAS,RRAS2				Endocannabinoid Developing Neuron Pathway	10.1	0.417	-2.111	ADCY7,AKT1,AKT1S1,AKT2,AKT3,ARAF,ATF2,ATF4,BRAF,CDKN1B,CREB1,CREB3,CREB3L1,CREB3L2,CREB5,CREBBP,CTNNB1,GNAI1,GNAI2,GNAI3,GNAO1,GNB4,GNG11,GNG12,GNG5,GSK3B,GUCY1A1,KRAS,MAP2K1,MAP2K3,MAP2K4,MAP2K5,MAPK1,MAPK14,MAPK6,MAPK8,MGLL,NRAS,PIK3C2A,PIK3CA,PRKACA,PRKACB,PRKAG1,PRKAG2,RAC1,RALA,RALB,RAP1A,RAP1B,RAP2A,RAP2B,RRAS2,STAT3
96	fMLP Signaling in Neutrophils	7.17	0.359	3.479	ACTR3,ARPC1B,ARPC2,ARPC5,Calm1 (includes others),CHP1,GNA12,GNAI2,GNAI3,GNAO1,GNAQ,GNB4,GNG10,GNG11,GNG12,GNG5,ITPR2,MAP2K1,MAPK1,MAPK3,NFAT5,NFATC1,NFKB1,NFKB2,NFKBIA,NFKBIB,NOX4,NRAS,PIK3C2A,PIK3CA,PIK3R1,PIK3R2,PLCB1,PLCB4,PPP3CA,PPP3CB,PRKCA,PRKCE,PRKCI,PRKD1,PRKD3,RALB,RAP1B,RAP2A,RAP2B,RELB,RRAS2			fMLP Signaling in Neutrophils	7.21	0.282	4.004	ACTR2,ACTR3,ARPC1B,ARPC2,ARPC3,ARPC4,ARPC5,ARPC5L,Calm1 (includes others),CHP1,GNA13,GNAS,GNB1,GNB2,GNB4,GNG10,GNG5,HRAS,ITPR1,MAP2K1,MAP2K2,MAPK3,NFAT5,NFATC3,NOX4,PIK3C2A,PIK3R2,PLCB4,PPP3CB,PPP3R1,PRKCA,RAF1,RALB,RAP1A,RAP1B,RRAS,RRAS2				fMLP Signaling in Neutrophils	7.05	0.366	-3.683	ACTR3,ARPC1B,ARPC2,ARPC4,ARPC5,Calm1 (includes others),GNA11,GNA12,GNA13,GNAI1,GNAI2,GNAI3,GNAO1,GNAQ,GNAS,GNB4,GNG11,GNG12,GNG5,ITPR1,ITPR2,KRAS,MAP2K1,MAPK1,NFAT5,NFATC1,NFKB1,NFKB2,NRAS,PIK3C2A,PIK3CA,PLCB1,PPP3CA,PPP3CB,PRKCA,PRKCE,PRKCI,RAC1,RALA,RALB,RAP1A,RAP1B,RAP2A,RAP2B,REL,RELA,RELB,RRAS2
97	Eicosanoid Signaling	7.16	0.293	3.488	ABCC1,ABCC9,ADCY5,AKT3,AP1G1,AP1S2,BRAF,CREB1,CREB3,CREB3L2,CREB5,CREBBP,DPEP1,EGFR,EGR1,GNAI2,GNAI3,GNAO1,GNAQ,GNB4,GNG10,GNG11,GNG12,GNG5,GUCY1A1,GUCY1B1,HSPB1,HSPB7,ITGB1,KLF4,LTA4H,MAP2K1,MAPK1,MAPK14,MAPK3,MAPKAP1,MAPKAPK2,MMP2,MYC,NFATC1,NFKB1,NFKB2,NRAS,PDIA3,PIK3C2A,PIK3CA,PIK3R1,PIK3R2,PLA2G12A,PLCB1,PLCB4,PLCE1,PLCL1,PNPLA8,PRDX6,PRKACB,PRKAG1,PRKAG2,PRKCA,PRKCE,PRKCI,PRKD1,PRKD3,PTGER4…			Eicosanoid Signaling	5.99	0.211	3.151	ABCC9,ADCY7,AKT1,AKT2,AKT3,AP1S1,AP1S2,ATF2,BAD,CREB3L1,CREB3L2,CREB5,CTNNB1,DPEP1,EGR1,GNAS,GNB1,GNB2,GNB4,GNG10,GNG5,GUCY1A1,HRAS,HSPB1,HSPB2,HSPB7,ITGB1,KCNJ8,KLF4,MAP2K1,MAP2K2,MAPK3,MAPKAPK2,MMP2,PDIA3,PIK3C2A,PIK3R2,PLA2G12A,PLA2G4A,PLCB4,PLCL1,PNPLA2,PNPLA8,PRDX6,PRKAR1A,PRKCA,PTGFR,PTGIS,PTGS1,RAF1,RALB,RAP1A,RAP1B,RHOA,RRAS,RRAS2,TCF4,VEGFB,VEGFD				Eicosanoid Signaling	5.47	0.282	-6.268	ADCY7,AKT1,AKT2,AKT3,AP1G1,AP1S1,ARAF,ARRB1,ATF2,ATF4,ATP2A2,BRAF,CREB1,CREB3,CREB3L1,CREB3L2,CREB5,CREBBP,CTNNB1,EGFR,ETS1,GNA11,GNAI1,GNAI2,GNAI3,GNAO1,GNAQ,GNAS,GNB4,GNG11,GNG12,GNG5,GUCY1A1,ITGB1,KCNJ8,KLF4,KRAS,LTA4H,MAP2K1,MAPK1,MAPK14,MAPKAP1,MAPKAPK2,MMP2,NFATC1,NFKB1,NFKB2,NRAS,PDIA3,PIK3C2A,PIK3CA,PLAAT3,PLCB1,PLCE1,PLCL1,PNPLA8,PRDX6,PRKACA,PRKACB,PRKAG1,PRKAG2,PRKCA,PRKCE,PRKCI,RALA,R…
98	Signaling by Rho Family GTPases	7.13	0.296	4.464	ACTA2,ACTB,ACTG1,ACTR3,ARHGEF1,ARHGEF10,ARHGEF11,ARHGEF12,ARHGEF6,ARPC1B,ARPC2,ARPC5,Cdc42,CDH11,CDH13,CFL2,CLIP1,CYFIP1,FNBP1,FOS,GNA12,GNAI2,GNAI3,GNAO1,GNAQ,GNB4,GNG10,GNG11,GNG12,GNG5,IQGAP1,ITGA1,ITGA5,ITGA9,ITGAV,ITGB1,ITGB5,ITGB8,JUN,MAP2K1,MAP2K4,MAPK1,MAPK3,MAPK8,MAPK9,MYL6,MYL9,NFKB1,NFKB2,NOX4,PAK2,PAK3,PARD3,PI4KA,PIK3C2A,PIK3CA,PIK3R1,PIK3R2,PIKFYVE,PIP4K2A,PIP4K2C,PIP5K1A,PKN1,PLD1,…			Signaling by Rho Family GTPases	5.32	0.206	3.086	ACTA2,ACTG1,ACTR2,ACTR3,ARFIP2,ARHGEF12,ARPC1B,ARPC2,ARPC3,ARPC4,ARPC5,ARPC5L,BAIAP2,CDC42EP2,CDC42EP3,CDC42EP5,CFL1,CFL2,CLIP1,FOS,GNA13,GNAS,GNB1,GNB2,GNB4,GNG10,GNG5,ITGA8,ITGAV,ITGB1,ITGB5,JUN,MAP2K1,MAP2K2,MAP3K20,MAPK3,MYL12A,MYL12B,MYL6,MYL9,NOX4,PAK3,PIK3C2A,PIK3R2,PPP1R12C,PTK2,RAF1,RHOA,RHOBTB1,RHOC,RHOJ,RHOQ,RND3,ROCK1,ROCK2				Signaling by Rho Family GTPases	6.35	0.296	-2.673	ACTA2,ACTG1,ACTR3,ARFIP2,ARHGEF1,ARHGEF10,ARHGEF11,ARHGEF12,ARHGEF2,ARHGEF6,ARPC1B,ARPC2,ARPC4,ARPC5,CDC42EP3,CDC42EP5,CDH11,CFL1,CLIP1,FNBP1,FOS,GNA11,GNA12,GNA13,GNAI1,GNAI2,GNAI3,GNAO1,GNAQ,GNAS,GNB4,GNG11,GNG12,GNG5,IQGAP1,ITGA1,ITGA9,ITGAV,ITGB1,ITGB5,ITGB8,MAP2K1,MAP2K4,MAP3K20,MAPK1,MAPK8,MYL9,NFKB1,NFKB2,PAK2,PAK3,PARD3,PI4KA,PIK3C2A,PIK3CA,PIKFYVE,PIP4K2A,PIP4K2C,PIP5K1A,PKN1,PPP1R12A,PP…
99	Tumor Microenvironment Pathway	6.87	0.324	3.474	AKT3,BCL2,BRAF,CFLAR,COL1A1,COL3A1,CSF1,CXCL12,FGF2,FGF7,FN1,FOS,FOXO1,FOXO3,HIF1A,HLA-A,HLA-E,HLA-G,ICAM1,IGF1,IL6,IL6R,ITGA5,JAK2,JUN,MAP2K1,MAP3K14,MAPK1,MAPK3,MMP14,MMP19,MMP2,MMP23B,MMP3,MYC,NFKB1,NFKB2,NRAS,PDGFD,PIK3C2A,PIK3CA,PIK3R1,PIK3R2,PTGS2,RALB,RAP1B,RAP2A,RAP2B,RELB,RRAS2,STAT3,TGFB2,TIAM1,TNFRSF1A,VEGFA,VEGFB,VEGFC,VEGFD			Tumor Microenvironment Pathway	3.83	0.207	2.333	AKT1,AKT2,AKT3,BAD,CFLAR,COL1A1,COL1A2,COL3A1,CSF1,FN1,FOS,HIF1A,HLA-A,HLA-E,HRAS,JUN,MAP2K1,MAP2K2,MAPK3,MMP2,MMP23B,PDGFA,PDGFD,PIK3C2A,PIK3R2,RAF1,RALB,RAP1A,RAP1B,RRAS,RRAS2,TGFB1,TGFB2,TGFB3,TNFRSF1A,VEGFB,VEGFD				Tumor Microenvironment Pathway	6.61	0.33	-4.009	AKT1,AKT2,AKT3,ARAF,BCL2,BRAF,CD44,CFLAR,COL1A1,COL1A2,COL3A1,CSF1,CXCL12,FAS,FGF2,FGF7,FOS,HIF1A,HLA-A,HLA-G,ICAM1,IL6R,JAK2,KRAS,MAP2K1,MAP3K14,MAPK1,MMP14,MMP16,MMP19,MMP2,MMP23B,MMP3,NFKB1,NFKB2,NRAS,PDGFA,PDGFD,PIK3C2A,PIK3CA,RAC1,RALA,RALB,RAP1A,RAP1B,RAP2A,RAP2B,REL,RELA,RELB,RRAS2,STAT3,TGFB2,TGFB3,TIAM1,TNFRSF1A,VEGFB,VEGFC,VEGFD
100	Mitotic Metaphase and Anaphase	6.87	0.302	2.492	AHCTF1,ANAPC1,ANAPC10,ANAPC11,ANAPC16,ANAPC4,ANAPC5,ANKLE2,CDC27,CENPC,CHMP2A,CHMP3,CLASP1,CLASP2,CLIP1,DYNC1H1,DYNC1LI2,DYNLL1,EMD,HDAC8,IST1,KPNB1,NDEL1,NUP98,PAFAH1B1,PDS5A,PDS5B,PPP2CA,PPP2CB,PPP2R2A,PPP2R5A,PPP2R5E,PSMA6,PSMB4,PSMB7,PSMC1,PSMC3,PSMD1,PSMD11,PSMD12,PSMD13,PSMD2,PSMD3,PSMD4,PSMD7,PSMD8,PSME2,PSME4,PTTG1,RAD21,RAN,SEH1L,SEM1,SIRT2,SMC3,STAG1,STAG2,SUMO1,TAOK1,TMPO,TNPO1,TUBA1A,…			Mitotic Metaphase and Anaphase	10.7	0.268	6.425	ANAPC11,ANAPC16,ANAPC5,BUB3,CDC16,CDC26,CHMP2A,CHMP2B,CHMP4B,CLASP2,CLIP1,DYNC1H1,EMD,KIF2A,LMNA,MAPRE1,PPP2CA,PSMA1,PSMA2,PSMA3,PSMA5,PSMA6,PSMA7,PSMB1,PSMB2,PSMB3,PSMB4,PSMB5,PSMB6,PSMB7,PSMC1,PSMC2,PSMC4,PSMC5,PSMC6,PSMD12,PSMD13,PSMD3,PSMD4,PSMD6,PSMD7,PSMD8,PSMD9,PSME2,PSME4,PTTG1,RAN,RPS27A,SEH1L,SMC1A,SUMO1,TAOK1,TMPO,TNPO1,TUBA1B,TUBA1C,TUBB2A,TUBB2B,TUBB4B,UBC,UBE2E1,UBE2I,UBE2S				Mitotic Metaphase and Anaphase	8.28	0.328	-5.584	AHCTF1,ANAPC1,ANAPC10,ANAPC11,ANAPC4,ANAPC5,ANKLE2,BANF1,BUB3,CDC26,CENPC,CHMP3,CKAP5,CLASP1,CLASP2,CLIP1,DYNC1LI2,DYNLL1,DYNLL2,EMD,HDAC8,IST1,KIF2A,KPNB1,MAPRE1,NDEL1,NUDC,NUP98,PAFAH1B1,PDS5A,PDS5B,POM121/POM121C,PPP2CA,PPP2CB,PPP2R1A,PPP2R2A,PPP2R5A,PPP2R5E,PSMA1,PSMA7,PSMB10,PSMB4,PSMB7,PSMB8,PSMC3,PSMC6,PSMD1,PSMD11,PSMD12,PSMD2,PSMD3,PSMD4,PSMD6,PSMD9,PSME1,PSME4,RAD21,SEC13,SEM1,SIRT2,SMC…
101	Glycosaminoglycan metabolism	6.85	0.412	4.004	B3GNT2,B4GALT1,B4GALT5,B4GAT1,BGN,CHP1,CHSY3,CSGALNACT2,DCN,DSE,DSEL,EXT1,EXT2,FMOD,GLCE,GPC3,GPC4,GPC6,HGSNAT,HSPG2,LUM,NDST1,OGN,OMD,PAPSS2,PRELP,SDC4,SLC35B2,SLC9A1,ST3GAL1,ST3GAL2,UST,VCAN			Glycosaminoglycan metabolism	2.57	0.225	3.3	B3GAT3,B3GNT2,B4GALT1,BGN,CHP1,CSGALNACT2,DCN,FMOD,GPC3,GPC4,NDST1,OGN,OMD,PAPSS1,PAPSS2,PRELP,SDC4,UST				Glycosaminoglycan metabolism	3.57	0.338	-4.811	B3GAT3,B3GNT2,B4GALT1,B4GALT5,CD44,CHSY1,DCN,DSE,EXT1,EXT2,FMOD,GLCE,GPC3,GPC4,GPC6,NDST1,OGN,PAPSS1,PRELP,SDC2,SDC3,SLC35B2,SLC9A1,ST3GAL1,ST3GAL2,ST3GAL4,UST
102	Role of MAPK Signaling in Promoting the Pathogenesis of Influenza	6.85	0.368	2.214	ATP6AP2,ATP6V0A1,ATP6V0B,ATP6V0C,ATP6V0D1,ATP6V0E1,ATP6V1A,ATP6V1B2,ATP6V1D,ATP6V1E1,ATP6V1F,ATP6V1H,BCL2,BECN1,BRAF,JUN,MAP2K1,MAP2K4,MAP3K5,MAPK1,MAPK14,MAPK3,MAPK8,MAPK9,NFKB1,NFKB2,NFKBIA,NFKBIB,NRAS,NUP153,PLA2G12A,PNPLA8,PRDX6,PRKCA,PTGS2,RABGEF1,RALB,RAP1B,RAP2A,RAP2B,RPS6KA3,RRAS2			Role of MAPK Signaling in Promoting the Pathogenesis of Influenza	4.38	0.246	4.6	ATF2,ATP6AP2,ATP6V0E1,ATP6V1A,ATP6V1C1,ATP6V1D,ATP6V1F,ATP6V1G1,ATP6V1H,BAX,HRAS,JUN,MAP2K1,MAP2K2,MAP2K3,MAPK3,PLA2G12A,PLA2G4A,PNPLA2,PNPLA8,PRDX6,PRKCA,RAF1,RALB,RAP1A,RAP1B,RRAS,RRAS2				Role of MAPK Signaling in Promoting the Pathogenesis of Influenza	3.87	0.316	-3.087	ARAF,ATF2,ATP6AP2,ATP6V0D1,ATP6V0E1,ATP6V1A,ATP6V1B2,ATP6V1E1,ATP6V1H,BCL2,BECN1,BRAF,KRAS,MAP2K1,MAP2K3,MAP2K4,MAP3K5,MAPK1,MAPK14,MAPK8,NFKB1,NFKB2,NRAS,NUP153,PLAAT3,PNPLA8,PRDX6,PRKCA,RABGEF1,RALA,RALB,RAP1A,RAP1B,RAP2A,RAP2B,RRAS2
103	Xenobiotic Metabolism General Signaling Pathway	6.73	0.343	3.571	AKT3,ARNT,CREBBP,CUL3,EP300,FTL,GCLC,GSTM1,GSTM3,GSTM5,GSTP1,HMOX1,KEAP1,MAF,MAP2K1,MAP2K4,MAP2K5,MAP3K14,MAP3K2,MAP3K3,MAP3K4,MAP3K5,MAP3K6,Map3k7,MAP3K8,MAPK1,MAPK14,MAPK3,MAPK8,MAPK9,MGST1,NFE2L2,NQO2,NRAS,PIK3C2A,PIK3CA,PIK3R1,PIK3R2,PRKCA,PRKCE,PRKCI,PRKD1,PRKD3,RALB,RAP1B,RAP2A,RAP2B,RRAS2,RXRA			Xenobiotic Metabolism General Signaling Pathway	3	0.203	3.78	AKT1,AKT2,AKT3,CUL3,EP300,FTL,GSTM3,GSTP1,GSTT2/GSTT2B,HRAS,MAF,MAP2K1,MAP2K2,MAP2K3,MAP3K2,Map3k7,MAPK3,MGST1,MGST3,NR1H2,PIK3C2A,PIK3R2,PRKCA,RAF1,RALB,RAP1A,RAP1B,RRAS,RRAS2				Xenobiotic Metabolism General Signaling Pathway	5.37	0.329	-3.539	AKT1,AKT2,AKT3,ARNT,CREBBP,CUL3,EIF2AK3,EP300,GSTA3,GSTM1,GSTM3,GSTP1,HMOX1,KEAP1,KRAS,MAF,MAP2K1,MAP2K3,MAP2K4,MAP2K5,MAP3K14,MAP3K2,MAP3K3,MAP3K4,MAP3K5,MAP3K6,Map3k7,MAPK1,MAPK14,MAPK8,NFE2L2,NQO2,NR1H2,NRAS,PIK3C2A,PIK3CA,PRKCA,PRKCE,PRKCI,RALA,RALB,RAP1A,RAP1B,RAP2A,RAP2B,RRAS2,RXRA
104	Signaling by NOTCH1	6.6	0.41	3.536	ADAM10,ADAM17,APH1A,CDK8,CREBBP,CUL1,DTX4,EP300,FBXW7,HDAC1,HDAC3,HDAC5,HDAC7,HDAC8,HDAC9,HIF1A,ITCH,KAT2B,MAML1,MAML3,MIB1,MYC,NBEA,NCOR1,NCSTN,PSEN2,RBPJ,SNW1,TBL1X,TBL1XR1,TLE1,UBC			Signaling by NOTCH1	3.12	0.244	2.982	APH1A,CCNC,CDK8,DTX4,EP300,HDAC2,HES1,HIF1A,KAT2B,MIB1,NBEA,NCSTN,PSENEN,RPS27A,TBL1XR1,TLE1,TLE3,TLE5,UBC				Signaling by NOTCH1	8.49	0.462	-3.667	ADAM10,ADAM17,APH1A,ARRB1,CCNC,CDK8,CREBBP,CUL1,DTX4,EP300,FBXW7,HDAC1,HDAC3,HDAC4,HDAC5,HDAC7,HDAC8,HEYL,HIF1A,ITCH,JAG1,KAT2B,MAML1,MAML3,NBEA,NCOR1,NCOR2,NUMB,PSEN1,PSEN2,PSENEN,RBPJ,SNW1,TBL1X,TBL1XR1,UBC
105	ERBB Signaling	6.58	0.387	3.667	EGFR,ERBB4,FOS,FOXO1,GRB2,GSK3B,JUN,MAP2K1,MAP2K4,MAPK1,MAPK14,MAPK3,MAPK8,MAPK9,NCK1,NRAS,PAK2,PAK3,PDPK1,PIK3C2A,PIK3CA,PIK3R1,PIK3R2,PRKCA,PRKCE,PRKCI,PRKD1,PRKD3,RALB,RAP1B,RAP2A,RAP2B,RPS6KB1,RRAS2,SHC1,SOS2			ERBB Signaling	3.76	0.247	3.128	AKT1,FOS,GSK3B,HBEGF,HRAS,JUN,MAP2K1,MAP2K2,MAP2K3,MAPK3,NCK1,PAK3,PIK3C2A,PIK3R2,PRKCA,RAF1,RALB,RAP1A,RAP1B,RPS6KB1,RRAS,RRAS2,SHC1				ERBB Signaling	5.17	0.366	-2.401	AKT1,EGFR,FOS,GRB2,GSK3B,HBEGF,KRAS,MAP2K1,MAP2K3,MAP2K4,MAPK1,MAPK14,MAPK8,NCK1,NRAS,PAK2,PAK3,PDPK1,PIK3C2A,PIK3CA,PRKCA,PRKCE,PRKCI,RALA,RALB,RAP1A,RAP1B,RAP2A,RAP2B,RPS6KB1,RRAS2,SHC1,SOS1,SOS2
106	Elastic fibre formation	6.51	0.5	2.985	BMP4,ELN,EMILIN2,FBLN1,FBLN2,FBLN5,FBN1,FN1,FURIN,ITGA5,ITGAV,ITGB1,ITGB5,ITGB8,LOX,LOXL1,LOXL3,LTBP2,LTBP4,MFAP2,MFAP4,TGFB2			Elastic fibre formation	12.6	0.568	3	EFEMP1,EFEMP2,EMILIN2,FBLN1,FBLN2,FBLN5,FBN1,FN1,FURIN,ITGA8,ITGAV,ITGB1,ITGB5,LOX,LOXL3,LTBP1,LTBP2,LTBP3,LTBP4,MFAP2,MFAP4,MFAP5,TGFB1,TGFB2,TGFB3				Elastic fibre formation	6.89	0.523	-3.545	BMP4,EFEMP2,EMILIN1,EMILIN2,FBLN1,FBLN2,FBLN5,FBN1,ITGAV,ITGB1,ITGB5,ITGB8,LOX,LOXL1,LOXL2,LOXL3,LTBP2,LTBP4,MFAP2,MFAP4,MFAP5,TGFB2,TGFB3
107	Renal Cell Carcinoma Signaling	6.45	0.405	2.858	AKT3,ARNT,CREBBP,CRK,ELOC,EP300,FOS,GAB1,GRB2,HIF1A,JUN,MAP2K1,MAPK1,MAPK3,NRAS,PAK2,PAK3,PIK3C2A,PIK3CA,PIK3R1,PIK3R2,PTPN11,RALB,RAP1B,RAP2A,RAP2B,RAPGEF1,RRAS2,SOS2,Ubb,UBC,VEGFA			Renal Cell Carcinoma Signaling	7.3	0.342	2.683	AKT1,AKT2,AKT3,CRK,ELOC,EP300,FOS,HIF1A,HRAS,JUN,MAP2K1,MAP2K2,MAPK3,PAK3,PIK3C2A,PIK3R2,PTPN11,RAF1,RALB,RAP1A,RAP1B,RPS27A,RRAS,RRAS2,TGFB1,Ubb,UBC				Renal Cell Carcinoma Signaling	6.56	0.418	-2.887	AKT1,AKT2,AKT3,ARNT,CREBBP,CRK,EP300,ETS1,FH,FOS,GAB1,GRB2,HIF1A,KRAS,MAP2K1,MAPK1,NRAS,PAK2,PAK3,PIK3C2A,PIK3CA,PTPN11,RAC1,RALA,RALB,RAP1A,RAP1B,RAP2A,RAP2B,RRAS2,SOS1,SOS2,UBC
108	Post-translational protein phosphorylation	6.27	0.364	4.003	ADAM10,AHSG,APLP2,APP,BMP4,C3,C4A/C4B,CALU,CHRDL1,CKAP4,CP,CSF1,DNAJC3,FAM20A,FBN1,FN1,GAS6,GPC3,HSP90B1,IGFBP5,IL6,ITIH2,LAMB1,LAMB2,LAMC1,LGALS1,MBTPS1,MFGE8,MGAT4A,MIA3,NUCB1,P4HB,PDIA6,PENK,PRSS23,SPARCL1,STC2,TIMP1,VCAN			Post-translational protein phosphorylation	5.9	0.28	2.191	APLP2,APOE,APP,C4A/C4B,CCN1,CHRDL1,CSF1,CST3,FBN1,FN1,FSTL3,GAS6,GPC3,HSP90B1,IGFBP4,IGFBP5,IGFBP7,ITIH2,LAMB1,LAMC1,LGALS1,LTBP1,MFGE8,MXRA8,PDIA6,PNPLA2,PRSS23,QSOX1,SHISA5,TIMP1				Post-translational protein phosphorylation	3.39	0.308	-3.656	ADAM10,APLP2,APOE,APP,BMP4,C3,C4A/C4B,CALU,CHRDL1,CKAP4,CSF1,CST3,DNAJC3,FAM20A,FAM20C,FBN1,GAS6,GPC3,HSP90B1,IGFBP5,IGFBP7,LAMB1,LAMC1,MBTPS1,MGAT4A,MIA3,P4HB,PDIA6,PRSS23,QSOX1,RCN1,SDC2,TF
109	Netrin Signaling	6.25	0.318	4.989	ABLIM1,ACTR3,AKT3,ARPC1B,ARPC2,ARPC5,BET1L,CACNA1A,CACNA1C,CAMK2D,CHP1,DOCK1,DPYSL2,DPYSL3,FMO1,FMO2,FMO3,FMO5,FYN,ITPR2,MAP2K1,MAPK1,MAPK3,MAPK8,NAPA,NCK1,NFAT5,NFATC1,NFKB1,NFKB2,NSF,PIK3C2A,PIK3CA,PIK3R1,PIK3R2,PPP3CA,PPP3CB,PRKACB,PRKAG1,PRKAG2,PRKCA,PRKCE,PRKCI,PRKD1,PRKD3,PRKG1,PTK2,RHOA,STX16,TIAM1,UNC5B,UNC5C,VAMP2,VTI1A,YKT6			Netrin Signaling	6.09	0.243	4.012	ACTR2,ACTR3,AKT1,AKT2,AKT3,ARPC1B,ARPC2,ARPC3,ARPC4,ARPC5,ARPC5L,CACNA1A,CACNA1C,CAMK2D,CHP1,DPYSL2,DPYSL3,FMO1,FMO2,FMO3,FMO5,GPAA1,ITPR1,MAP2K1,MAP2K2,MAPK3,NAPA,NCK1,NFAT5,NFATC3,NTN1,PGK1,PIK3C2A,PIK3R2,PPP3CB,PPP3R1,PRKAR1A,PRKCA,PTK2,RHOA,VAMP2,VASP				Netrin Signaling	5.3	0.312	-3.81	ABLIM1,ACTR3,AKT1,AKT2,AKT3,ARPC1B,ARPC2,ARPC4,ARPC5,BET1L,CACNA1A,CACNA2D1,CAMK2D,DOCK1,DPYSL2,DPYSL3,FMO2,FMO5,GOSR2,ITPR1,ITPR2,MAP2K1,MAPK1,MAPK8,NCK1,NEO1,NFAT5,NFATC1,NFKB1,NFKB2,NSF,PIK3C2A,PIK3CA,PPP3CA,PPP3CB,PRKACA,PRKACB,PRKAG1,PRKAG2,PRKCA,PRKCE,PRKCI,PRKG1,PTK2,RAC1,STX16,TIAM1,TRIO,UNC5B,UNC5C,VAMP2,VASP,VTI1A,YKT6
110	Pancreatic Secretion Signaling Pathway	6.22	0.29	4.391	ABHD11,ADCY5,AHCYL1,AKT1S1,AKT3,AMY2A,AQP1,ARHGDIA,ARHGEF1,ARHGEF10,ARHGEF11,ARHGEF12,ARHGEF6,ATP2B1,ATP2B4,BET1L,DAGLB,DIAPH1,EGFR,EIF4EBP1,GNA12,GNAQ,GUCY1A1,GUCY1B1,IRF2,ITPR2,LIPA,MAPK1,MAPK3,MCU,NAPA,NSF,PAK2,PDIA3,PIK3C2A,PIK3CA,PIK3R1,PIK3R2,PLCB1,PLCB4,PLCE1,PLCL1,PPP1CA,PPP1CB,Ppp1cc,PPP1R7,PRKACB,PRKAG1,PRKAG2,PRKCA,PRKCE,PRKCI,PRKD1,PRKD3,RAP1B,RHOA,ROCK1,ROCK2,RPS6KB1,SLC4A4,SLC4A7,SL…			Pancreatic Secretion Signaling Pathway	2.65	0.173	2.777	ABHD11,ADCY7,AHCYL1,AKT1,AKT2,AKT3,AQP1,ARHGDIA,ARHGEF12,ATP2B1,EIF4EBP1,GNA13,GNAS,GPAA1,GUCY1A1,ITPR1,LPL,MAPK3,MCU,NAPA,PDIA3,PIK3C2A,PIK3R2,PLCB4,PLCL1,PPP1CA,PPP1CB,Ppp1cc,PPP1R10,PPP1R14A,PPP1R14B,PRKAR1A,PRKCA,RAP1A,RAP1B,RHOA,ROCK1,ROCK2,RPS6KB1,SLC6A6,STK39,STXBP3,VAMP2				Pancreatic Secretion Signaling Pathway	6.48	0.302	-4.882	ABHD11,ADCY7,AHCYL1,AKT1,AKT1S1,AKT2,AKT3,ARHGDIA,ARHGDIB,ARHGEF1,ARHGEF10,ARHGEF11,ARHGEF12,ARHGEF2,ARHGEF6,ATP2A2,ATP2B1,ATP2B4,BET1L,DIAPH1,EGFR,EIF4EBP1,GNA12,GNA13,GNAQ,GNAS,GOSR2,GUCY1A1,ITPR1,ITPR2,LIPA,LPL,MAPK1,MCU,NSF,PAK2,PDIA3,PIK3C2A,PIK3CA,PLCB1,PLCE1,PLCL1,PPP1CA,PPP1CB,Ppp1cc,PPP1R10,PPP1R11,PPP1R12A,PPP1R7,PRKACA,PRKACB,PRKAG1,PRKAG2,PRKCA,PRKCE,PRKCI,RAC1,RAP1A,RAP1B,ROCK1,ROCK2…
111	Regulation of TP53 Activity through Acetylation	6.16	0.567	3.153	AKT3,BRD1,BRD7,CHD3,CHD4,EP300,GATAD2A,GATAD2B,HDAC1,ING2,ING5,KAT6A,PIP4K2A,PIP4K2C,PIP4P1,RBBP7,TP53			Regulation of TP53 Activity through Acetylation	5.12	0.433	2.496	AKT1,AKT2,AKT3,BRD1,CHD3,EP300,HDAC2,MBD3,PIN1,PIP4P1,RBBP4,RBBP7,TP53				Regulation of TP53 Activity through Acetylation	8.56	0.667	-4.025	AKT1,AKT2,AKT3,BRD1,CHD3,CHD4,EP300,GATAD2A,GATAD2B,HDAC1,ING2,ING5,KAT6A,MEAF6,PIN1,PIP4K2A,PIP4K2C,PIP4P1,RBBP7,TP53
112	Regulation of Insulin-like Growth Factor (IGF) transport and uptake by IGFBPs	6.15	0.347	4.117	ADAM10,AHSG,APLP2,APP,BMP4,C3,C4A/C4B,CALU,CHRDL1,CKAP4,CP,CSF1,DNAJC3,FAM20A,FBN1,FN1,GAS6,GPC3,HSP90B1,IGF1,IGFBP5,IGFBP6,IL6,ITIH2,LAMB1,LAMB2,LAMC1,LGALS1,MBTPS1,MFGE8,MGAT4A,MIA3,MMP2,NUCB1,P4HB,PAPPA,PDIA6,PENK,PRSS23,SPARCL1,STC2,TIMP1,VCAN			Regulation of Insulin-like Growth Factor (IGF) transport and uptake by IGFBPs	5.4	0.258	2.121	APLP2,APOE,APP,C4A/C4B,CCN1,CHRDL1,CSF1,CST3,FBN1,FN1,FSTL3,GAS6,GPC3,HSP90B1,IGFBP4,IGFBP5,IGFBP6,IGFBP7,ITIH2,LAMB1,LAMC1,LGALS1,LTBP1,MFGE8,MMP2,MXRA8,PDIA6,PNPLA2,PRSS23,QSOX1,SHISA5,TIMP1				Regulation of Insulin-like Growth Factor (IGF) transport and uptake by IGFBPs	2.78	0.282	-3.888	ADAM10,APLP2,APOE,APP,BMP4,C3,C4A/C4B,CALU,CHRDL1,CKAP4,CSF1,CST3,DNAJC3,FAM20A,FAM20C,FBN1,GAS6,GPC3,HSP90B1,IGFBP5,IGFBP7,LAMB1,LAMC1,MBTPS1,MGAT4A,MIA3,MMP2,P4HB,PAPPA,PDIA6,PRSS23,QSOX1,RCN1,SDC2,TF
113	Factors Promoting Cardiogenesis in Vertebrates	6.14	0.327	3.833	ACVR2A,APC,AXIN1,BMP4,BMPR1A,BMPR2,CAMK2D,CREB1,CREB3,CREB3L2,CREB5,CREBBP,FZD1,FZD2,FZD4,GSK3B,LRP1,LRP5,LRP6,MAP2K4,MAPK14,MAPK8,MAPK9,MYC,NOX4,PDIA3,PLCB1,PLCB4,PLCE1,PLCL1,PRKCA,PRKCE,PRKCI,PRKD1,PRKD3,RHOA,ROCK1,ROCK2,SMAD1,SMAD4,SMAD5,SMO,TCF3,TCF4,TCF7L1,TCF7L2,TGFB2,TGFBR2,TGFBR3,WNT9A			Factors Promoting Cardiogenesis in Vertebrates	3.49	0.209	2.414	ACVR1,APC,ATF2,BMP1,BMPR1A,BMPR2,CAMK2D,CREB3L1,CREB3L2,CREB5,CTNNB1,FZD2,FZD4,GSK3B,LRP1,MEF2C,NOX4,PDIA3,PLCB4,PLCL1,PRKCA,RHOA,ROCK1,ROCK2,SMAD4,TCF4,TGFB1,TGFB2,TGFB3,TGFBR1,TGFBR3,WNT5A				Factors Promoting Cardiogenesis in Vertebrates	4.85	0.314	-5.126	ACVR1,ACVR2A,ACVRL1,APC,ATF2,ATF4,BMP4,BMPR1A,BMPR2,CAMK2D,CREB1,CREB3,CREB3L1,CREB3L2,CREB5,CREBBP,CTNNB1,FZD2,FZD4,FZD7,GSK3B,LRP6,MAP2K4,MAPK14,MAPK8,MEF2C,PDIA3,PLCB1,PLCE1,PLCL1,PRKCA,PRKCE,PRKCI,ROCK1,ROCK2,SMAD1,SMAD4,SMAD5,SMO,TCF3,TCF4,TCF7L1,TCF7L2,TGFB2,TGFB3,TGFBR2,WNT5A,WNT9A
114	FLT3 Signaling in Hematopoietic Progenitor Cells	6.02	0.39	3.772	AKT3,CREB1,CREB3,CREB3L2,CREB5,CREBBP,EIF4EBP1,GAB2,GRB2,MAP2K1,MAPK1,MAPK14,MAPK3,NRAS,PDPK1,PIK3C2A,PIK3CA,PIK3R1,PIK3R2,PTPN11,RALB,RAP1B,RAP2A,RAP2B,RPS6KA3,RPS6KB1,RRAS2,SHC1,SOS2,STAT3,STAT5B,STAT6			FLT3 Signaling in Hematopoietic Progenitor Cells	6.92	0.329	3.4	AKT1,AKT2,AKT3,ATF2,BAD,CREB3L1,CREB3L2,CREB5,EIF4E,EIF4EBP1,GAB2,HRAS,MAP2K1,MAP2K2,MAPK3,PIK3C2A,PIK3R2,PTPN11,RAF1,RALB,RAP1A,RAP1B,RPS6KB1,RRAS,RRAS2,SHC1,STAT6				FLT3 Signaling in Hematopoietic Progenitor Cells	11	0.5	-4.323	AKT1,AKT2,AKT3,ATF2,ATF4,CBL,CREB1,CREB3,CREB3L1,CREB3L2,CREB5,CREBBP,EIF4E,EIF4EBP1,FLT3LG,GAB2,GRB2,KRAS,MAP2K1,MAPK1,MAPK14,NRAS,PDPK1,PIK3C2A,PIK3CA,PTPN11,RALA,RALB,RAP1A,RAP1B,RAP2A,RAP2B,RPS6KB1,RRAS2,SHC1,SOS1,SOS2,STAT2,STAT3,STAT5B,STAT6
115	Estrogen-Dependent Breast Cancer Signaling	6.02	0.39	2.502	AKR1B10,AKT3,CREB1,CREB3,CREB3L2,CREB5,CREBBP,EGFR,ESR1,FOS,HSD17B11,HSD17B4,IGF1,IGF1R,JUN,MAPK1,MAPK3,NFKB1,NFKB2,NRAS,PIK3C2A,PIK3CA,PIK3R1,PIK3R2,RALB,RAP1B,RAP2A,RAP2B,RELB,RRAS2,SP1,STAT5B			Estrogen-Dependent Breast Cancer Signaling	3.71	0.256	2.183	AKR1B10,AKT1,AKT2,AKT3,ATF2,CREB3L1,CREB3L2,CREB5,ESR1,FOS,HRAS,HSD17B10,JUN,MAPK3,PIK3C2A,PIK3R2,RALB,RAP1A,RAP1B,RRAS,RRAS2				Estrogen-Dependent Breast Cancer Signaling	8.37	0.451	-2.191	AKR1B10,AKT1,AKT2,AKT3,ATF2,ATF4,CREB1,CREB3,CREB3L1,CREB3L2,CREB5,CREBBP,EGFR,ESR1,FOS,HSD17B11,HSD17B4,IGF1R,KRAS,MAPK1,NFKB1,NFKB2,NRAS,PIK3C2A,PIK3CA,RALA,RALB,RAP1A,RAP1B,RAP2A,RAP2B,REL,RELA,RELB,RRAS2,SP1,STAT5B
116	Translocation of SLC2A4 (GLUT4) to the plasma membrane	5.99	0.408	2.043	ACTB,ACTG1,EXOC2,EXOC3,EXOC4,EXOC5,EXOC7,KIFAP3,LNPEP,MYH9,MYO1C,MYO5A,PRKAG1,PRKAG2,RAB10,RAB13,RAB14,RALGAPB,RHOQ,SNAP23,TUBA1A,TUBA1B,TUBA1C,TUBB2A,TUBB4B,VAMP2,YWHAB,YWHAE,YWHAG			Translocation of SLC2A4 (GLUT4) to the plasma membrane	6.46	0.338	3.266	ACTG1,AKT1,AKT2,ASPSCR1,EXOC5,LNPEP,MYH9,MYO1C,RAB11A,RAB13,RHOQ,SNAP23,STX4,STXBP3,TUBA1B,TUBA1C,TUBB2A,TUBB2B,TUBB4B,VAMP2,YWHAE,YWHAH,YWHAQ,YWHAZ				Translocation of SLC2A4 (GLUT4) to the plasma membrane	9.93	0.507	-3.333	ACTG1,AKT1,AKT2,ASPSCR1,EXOC2,EXOC3,EXOC4,EXOC5,EXOC7,KIFAP3,MYH9,MYO1C,MYO5A,PRKAB2,PRKAG1,PRKAG2,RAB10,RAB11A,RAB13,RAB14,RAB8A,RAC1,RALA,RALGAPB,RHOQ,SNAP23,STX4,TUBA1C,TUBB2A,TUBB4B,TUBB6,VAMP2,YWHAB,YWHAE,YWHAG,YWHAQ
117	EPH-Ephrin signaling	5.95	0.372	3.55	ACTB,ACTG1,ACTR3,ADAM10,AP2A2,Ap2b1,APH1A,ARHGEF28,ARPC1B,ARPC2,ARPC5,CLTB,CLTC,DNM1,EFNA5,EPHA3,FYN,ITSN1,KALRN,MMP2,MYH11,MYH9,MYL6,MYL9,NCSTN,PAK2,PAK3,PSEN2,PTK2,RASA1,RHOA,ROCK1,ROCK2,TIAM1,YES1			EPH-Ephrin signaling	9.12	0.351	4.352	ACTG1,ACTR2,ACTR3,AP2A1,AP2S1,APH1A,ARPC1B,ARPC2,ARPC3,ARPC4,ARPC5,CFL1,CLTA,CLTB,CLTC,DNM1,HRAS,MMP2,MYH11,MYH9,MYL12A,MYL12B,MYL6,MYL9,NCSTN,PAK3,PSENEN,PTK2,RASA1,RHOA,ROCK1,ROCK2,SDCBP				EPH-Ephrin signaling	7	0.404	-3.244	ACTG1,ACTR3,ADAM10,AP2A2,Ap2b1,AP2M1,APH1A,ARHGEF28,ARPC1B,ARPC2,ARPC4,ARPC5,CFL1,CLTB,CLTC,EFNA5,EPHA7,ITSN1,KALRN,MMP2,MYH10,MYH11,MYH9,MYL9,PAK2,PAK3,PSEN1,PSEN2,PSENEN,PTK2,RAC1,RASA1,ROCK1,ROCK2,SDC2,TIAM1,VAV3,YES1
118	TNF signaling	5.94	0.439	3	ADAM17,BIRC2,BIRC3,CFLAR,CHUK,CLIP3,CYLD,MAPKAPK2,NSMAF,OPTN,OTUD7B,OTULIN,RACK1,SPPL2A,TAB2,TAX1BP1,TBK1,TNFAIP3,TNFRSF1A,UBC,UBE2D1,UBE2D3,UBE2L3,USP4,XIAP			TNF signaling	2.48	0.246	2.673	BIRC2,CFLAR,MAPKAPK2,OTUD7B,RPS27A,SMPD3,SPPL2A,STUB1,TAX1BP1,TNFRSF1A,UBC,UBE2D2,UBE2D3,XIAP				TNF signaling	5.02	0.421	-3.674	ADAM17,CFLAR,CHUK,CLIP3,CYLD,MAPKAPK2,NSMAF,OPTN,OTULIN,RACK1,RBCK1,SPPL2A,STUB1,TAB2,TAX1BP1,TBK1,TNFRSF1A,UBC,UBE2D1,UBE2D2,UBE2D3,UBE2L3,USP4,XIAP
119	Virus Entry via Endocytic Pathways	5.92	0.347	3.124	ABL1,ACTA2,ACTB,ACTG1,AP1G1,AP1S2,AP2A2,Ap2b1,AP3B1,AP3D1,AP3S1,CLTB,CLTC,DNM1,DNM2,FLNB,FYN,HLA-A,HLA-E,HLA-G,ITGA5,ITGB1,ITGB5,ITGB8,ITSN1,MR1,NRAS,PIK3C2A,PIK3CA,PIK3R1,PIK3R2,PRKCA,PRKCE,PRKCI,PRKD1,PRKD3,RALB,RAP1B,RAP2A,RAP2B,RRAS2			Virus Entry via Endocytic Pathways	4.52	0.246	4.2	ABL1,ACTA2,ACTG1,AP1S1,AP1S2,AP2A1,AP2S1,AP3S1,AP4S1,B2M,CAV1,CLTA,CLTB,CLTC,DNM1,HLA-A,HLA-E,HRAS,ITGB1,ITGB5,MR1,PIK3C2A,PIK3R2,PRKCA,RALB,RAP1A,RAP1B,RRAS,RRAS2				Virus Entry via Endocytic Pathways	4.25	0.322	-2.874	ABL1,ACTA2,ACTG1,AP1G1,AP1S1,AP2A2,Ap2b1,AP2M1,AP3B1,AP3D1,AP4S1,CD55,CLTB,CLTC,DNM2,FLNB,HLA-A,HLA-G,ITGB1,ITGB5,ITGB8,ITSN1,KRAS,MR1,NRAS,PIK3C2A,PIK3CA,PRKCA,PRKCE,PRKCI,RAC1,RALA,RALB,RAP1A,RAP1B,RAP2A,RAP2B,RRAS2
120	ERBB4 Signaling	5.89	0.412	2.858	ADAM17,APH1A,ERBB4,GRB2,MAP2K1,MAPK1,MAPK3,NCSTN,NRAS,PDPK1,PIK3C2A,PIK3CA,PIK3R1,PIK3R2,PRKCA,PRKCE,PRKCI,PRKD1,PRKD3,PSEN2,RALB,RAP1B,RAP2A,RAP2B,RRAS2,SHC1,SOS2,YAP1			ERBB4 Signaling	3.45	0.265	3.873	AKT1,APH1A,HRAS,MAP2K1,MAP2K2,MAPK3,NCSTN,PIK3C2A,PIK3R2,PRKCA,PSENEN,RAF1,RALB,RAP1A,RAP1B,RRAS,RRAS2,SHC1				ERBB4 Signaling	5.52	0.412	-2.711	ADAM17,AKT1,APH1A,GRB2,KRAS,MAP2K1,MAPK1,NRAS,PDPK1,PIK3C2A,PIK3CA,PRKCA,PRKCE,PRKCI,PSEN1,PSEN2,PSENEN,RALA,RALB,RAP1A,RAP1B,RAP2A,RAP2B,RRAS2,SHC1,SOS1,SOS2,YAP1
121	Signaling by NOTCH4	5.88	0.386	2.121	ACTA2,ADAM10,APH1A,CREBBP,CUL1,EP300,FBXW7,KAT2B,MAML1,MAML3,NCSTN,PSEN2,PSMA6,PSMB4,PSMB7,PSMC1,PSMC3,PSMD1,PSMD11,PSMD12,PSMD13,PSMD2,PSMD3,PSMD4,PSMD7,PSMD8,PSME2,RBPJ,SEM1,SMAD3,SNW1,UBC			Signaling by NOTCH4	15.6	0.47	4.964	ACTA2,AKT1,APH1A,EP300,HES1,KAT2B,NCSTN,PSENEN,PSMA1,PSMA2,PSMA3,PSMA5,PSMA6,PSMA7,PSMB1,PSMB2,PSMB3,PSMB4,PSMB5,PSMB6,PSMB7,PSMC1,PSMC2,PSMC4,PSMC5,PSMC6,PSMD12,PSMD13,PSMD3,PSMD4,PSMD6,PSMD7,PSMD8,PSMD9,PSME2,RPS27A,SMAD3,UBC,YWHAZ				Signaling by NOTCH4	8.8	0.458	-2.596	ACTA2,ADAM10,AKT1,APH1A,CREBBP,CUL1,EP300,FBXW7,JAG1,KAT2B,MAML1,MAML3,NOTCH2,PSEN1,PSEN2,PSENEN,PSMA1,PSMA7,PSMB10,PSMB4,PSMB7,PSMB8,PSMC3,PSMC6,PSMD1,PSMD11,PSMD12,PSMD2,PSMD3,PSMD4,PSMD6,PSMD9,PSME1,RBPJ,SEM1,SMAD3,SNW1,UBC
122	Mitotic G1 phase and G1/S transition	5.85	0.336	2.137	ABL1,AKT3,CABLES1,CCND2,CCND3,CCNH,CDK7,CDKN1A,CDKN1B,CDKN2C,CUL1,DYRK1A,HDAC1,JAK2,LIN52,MAX,MNAT1,MYC,ORC2,PCNA,PPP2CA,PPP2CB,PPP2R2A,PSMA6,PSMB4,PSMB7,PSMC1,PSMC3,PSMD1,PSMD11,PSMD12,PSMD13,PSMD2,PSMD3,PSMD4,PSMD7,PSMD8,PSME2,RB1,RBL2,SEM1,TFDP1,TFDP2,UBC			Mitotic G1 phase and G1/S transition	13.1	0.359	4.529	ABL1,AKT1,AKT2,AKT3,CCND2,CCND3,CCNH,CDK4,CDKN1A,CDKN2D,CKS1B,MAX,ORC4,PCNA,PPP2CA,PSMA1,PSMA2,PSMA3,PSMA5,PSMA6,PSMA7,PSMB1,PSMB2,PSMB3,PSMB4,PSMB5,PSMB6,PSMB7,PSMC1,PSMC2,PSMC4,PSMC5,PSMC6,PSMD12,PSMD13,PSMD3,PSMD4,PSMD6,PSMD7,PSMD8,PSMD9,PSME2,RBBP4,RPS27A,TFDP1,TFDP2,UBC				Mitotic G1 phase and G1/S transition	6.61	0.359	-2.846	ABL1,AKT1,AKT2,AKT3,CABLES1,CCND2,CCNH,CDK4,CDKN1A,CDKN1B,CDKN2C,CUL1,DYRK1A,HDAC1,JAK2,LIN52,MNAT1,ORC2,ORC4,ORC6,PCNA,PPP2CA,PPP2CB,PPP2R1A,PPP2R2A,PSMA1,PSMA7,PSMB10,PSMB4,PSMB7,PSMB8,PSMC3,PSMC6,PSMD1,PSMD11,PSMD12,PSMD2,PSMD3,PSMD4,PSMD6,PSMD9,PSME1,RB1,RBL2,SEM1,TFDP1,UBC
123	BMP signaling pathway	5.84	0.374	3.536	ACVR2A,BMP4,BMPR1A,BMPR2,CREB1,CREBBP,FST,GRB2,JUN,MAP2K1,MAP2K4,MAPK1,MAPK14,MAPK3,MAPK8,MAPK9,NFKB1,NFKB2,NRAS,PRKACB,PRKAG1,PRKAG2,RALB,RAP1B,RAP2A,RAP2B,RELB,RRAS2,SMAD1,SMAD4,SMAD5,SMAD7,SMURF1,XIAP			BMP signaling pathway	3.06	0.231	3.13	ACVR1,ATF2,BMP1,BMPR1A,BMPR2,FST,HRAS,JUN,MAP2K1,MAP2K2,MAPK3,PRKAR1A,RAF1,RALB,RAP1A,RAP1B,RRAS,RRAS2,SMAD4,SMAD7,XIAP				BMP signaling pathway	10.4	0.473	-4	ACVR1,ACVR2A,ACVRL1,ATF2,BMP4,BMPR1A,BMPR2,CREB1,CREBBP,FST,GRB2,KRAS,MAGED1,MAP2K1,MAP2K4,MAPK1,MAPK14,MAPK8,NFKB1,NFKB2,NRAS,PRKACA,PRKACB,PRKAG1,PRKAG2,RALA,RALB,RAP1A,RAP1B,RAP2A,RAP2B,REL,RELA,RELB,RRAS2,SMAD1,SMAD4,SMAD5,SMAD7,SMURF1,SOS1,XIAP,ZNF423
124	Pyridoxal 5'-phosphate Salvage Pathway	5.79	0.415	3.53	ACVR2A,BRAF,CDK7,CDK8,CSNK1A1,CSNK1D,DAPK1,DMPK,DYRK1A,GRK5,HIPK1,IRAK1,MAP2K1,MAP2K4,MAP3K6,MAP3K8,MAPK1,MAPK3,MAPK6,MAPK8,MAPK9,PAK2,PAK3,PIM1,PKN1,PRKCE,PRPF4B			Pyridoxal 5'-phosphate Salvage Pathway	1.59	0.2	2.496	AKT2,CDK4,CDK8,CSNK1A1,DAPK1,HIPK1,IRAK1,MAP2K1,MAP2K2,MAP2K3,MAPK3,PAK3,PDXK				Pyridoxal 5'-phosphate Salvage Pathway	3.91	0.369	-2.041	ACVR2A,AKT2,ARAF,BRAF,CDK4,CDK8,CSNK1A1,CSNK1D,DYRK1A,GRK5,IRAK1,MAP2K1,MAP2K3,MAP2K4,MAP3K6,MAPK1,MAPK6,MAPK8,PAK2,PAK3,PDXK,PKN1,PRKCE,PRKX
125	UVC-Induced MAPK Signaling	5.77	0.451	2.294	BRAF,EGFR,FOS,JUN,MAP2K1,MAP2K4,MAPK1,MAPK14,MAPK3,MAPK8,MAPK9,NRAS,PRKCA,PRKCE,PRKCI,PRKD1,PRKD3,RALB,RAP1B,RAP2A,RAP2B,RRAS2,TP53			UVC-Induced MAPK Signaling	3.5	0.294	2.84	FOS,HRAS,JUN,MAP2K1,MAP2K2,MAPK3,PRKCA,RAF1,RALB,RAP1A,RAP1B,RRAS,RRAS2,SMPD3,TP53				UVC-Induced MAPK Signaling	5.44	0.451	-2.294	ARAF,BRAF,EGFR,FOS,KRAS,MAP2K1,MAP2K4,MAPK1,MAPK14,MAPK8,NRAS,PRKCA,PRKCE,PRKCI,RALA,RALB,RAP1A,RAP1B,RAP2A,RAP2B,RRAS2,SMPD1,TP53
126	Serotonin Receptor Signaling	5.72	0.249	5.27	ACAT1,ADCY5,AKT3,APP,ARFGEF1,ARFGEF2,BCL2,BRAF,CACNA1A,CACNA1C,Calm1 (includes others),CAMK2D,Cdc42,COPS5,CREB1,CREB3,CREB3L2,CREB5,CREBBP,EIF4EBP1,FNBP1,FOXO1,FOXO3,FYN,GCH1,GNA12,GNAI2,GNAI3,GNAO1,GNAQ,GNB4,GNG10,GNG11,GNG12,GNG5,GSK3B,GUCY1A1,GUCY1B1,H3-3A/H3-3B,HIF1A,HMOX1,IL33,IL6,ITGB1,JAK2,JUN,KALRN,MAP1LC3B,MAP2K1,MAP2K4,MAP2K5,MAP3K5,MAPK1,MAPK14,MAPK3,MMP2,MPDZ,MPRIP,MYC,NFKB1,NFKB2,NFK…			Serotonin Receptor Signaling	3.48	0.164	3.989	ACAT1,ADCY7,AKT1,AKT2,AKT3,APP,ATF2,CACNA1A,CACNA1C,Calm1 (includes others),CAMK2D,CAV1,CAV2,CREB3L1,CREB3L2,CREB5,EIF4EBP1,GNA13,GNAS,GNB1,GNB2,GNB4,GNG10,GNG5,GSK3B,GUCY1A1,H3-3A/H3-3B,HIF1A,HRAS,IL33,ITGB1,JUN,MAP1LC3B,MAP2K1,MAP2K2,MAP2K3,MAPK3,MMP2,PAK3,PDIA3,PIK3C2A,PIK3R2,PLA2G12A,PLA2G4A,PLCB4,PLCL1,PNPLA2,PNPLA8,PPP1CB,PRDX6,PRKAR1A,PRKCA,PTGS1,QDPR,RAB3A,RAB4B,RAF1,RALB,RAP1A,RAP1B,RHOA…				Serotonin Receptor Signaling	4.62	0.247	-6.871	ACAT1,ADCY7,AKT1,AKT2,AKT3,APP,ARAF,ARFGEF1,ARFGEF2,ARRB1,ATF2,ATF4,BCL2,BRAF,CACNA1A,CACNA2D1,Calm1 (includes others),CAMK2D,CD44,COPS5,CREB1,CREB3,CREB3L1,CREB3L2,CREB5,CREBBP,EIF4EBP1,FNBP1,GCH1,GNA11,GNA12,GNA13,GNAI1,GNAI2,GNAI3,GNAO1,GNAQ,GNAS,GNB4,GNG11,GNG12,GNG5,GSK3B,GUCY1A1,HIF1A,HMOX1,IL33,ITGB1,JAK2,KALRN,KRAS,MAOB,MAP2K1,MAP2K3,MAP2K4,MAP2K5,MAP3K5,MAPK1,MAPK14,MMP2,MPDZ,MPRIP,NFKB1…
127	IL-2 Signaling	5.7	0.419	2.985	AKT3,CSNK2A1,CSNK2A2,FOS,GRB2,JAK1,JUN,MAP2K1,MAPK1,MAPK3,MAPK8,NRAS,PIK3C2A,PIK3CA,PIK3R1,PIK3R2,PTPN11,RALB,RAP1B,RAP2A,RAP2B,RRAS2,SHC1,SOCS1,SOS2,STAT5B			IL-2 Signaling	5.75	0.339	2.828	AKT1,AKT2,AKT3,CSNK2A1,CSNK2B,FOS,HRAS,JUN,MAP2K1,MAP2K2,MAPK3,PIK3C2A,PIK3R2,PTPN11,RAF1,RALB,RAP1A,RAP1B,RRAS,RRAS2,SHC1				IL-2 Signaling	5.91	0.435	-2.858	AKT1,AKT2,AKT3,CSNK2A1,CSNK2A2,FOS,GRB2,JAK1,KRAS,MAP2K1,MAPK1,MAPK8,NRAS,PIK3C2A,PIK3CA,PTPN11,RALA,RALB,RAP1A,RAP1B,RAP2A,RAP2B,RRAS2,SHC1,SOS1,SOS2,STAT5B
128	HMGB1 Signaling	5.64	0.311	3.429	AKT3,Cdc42,Eda,FNBP1,FOS,ICAM1,IFNGR1,IFNGR2,IL17D,IL1R1,IL33,IL6,JUN,KAT2B,KAT6A,Kat6b,KAT7,MAP2K1,MAP2K4,MAP2K5,MAPK1,MAPK14,MAPK3,MAPK8,MAPK9,NFKB1,NFKB2,NRAS,PIK3C2A,PIK3CA,PIK3R1,PIK3R2,RALB,RAP1B,RAP2A,RAP2B,RBBP7,RELB,RHOA,RHOB,RHOC,RHOJ,RHOQ,RHOT1,RRAS2,SERPINE1,SP1,TGFB2,TLR4,TNFRSF1A,TNFSF13B,VCAM1			HMGB1 Signaling	4.87	0.228	3.182	AKT1,AKT2,AKT3,FOS,HRAS,IFNGR2,IL1R1,IL33,JUN,KAT2B,MAP2K1,MAP2K2,MAP2K3,MAPK3,PIK3C2A,PIK3R2,PLAT,RALB,RAP1A,RAP1B,RBBP7,RHOA,RHOBTB1,RHOC,RHOJ,RHOQ,RND3,RRAS,RRAS2,SERPINE1,TGFB1,TGFB2,TGFB3,TLR4,TNFRSF11B,TNFRSF1A,TNFSF12,TNFSF13B				HMGB1 Signaling	5.45	0.317	-2.949	AKT1,AKT2,AKT3,Eda,FNBP1,FOS,ICAM1,IFNGR2,IL1R1,IL33,KAT2B,KAT6A,Kat6b,KAT7,KRAS,MAP2K1,MAP2K3,MAP2K4,MAP2K5,MAPK1,MAPK14,MAPK8,NFKB1,NFKB2,NRAS,PIK3C2A,PIK3CA,RAC1,RALA,RALB,RAP1A,RAP1B,RAP2A,RAP2B,RBBP7,REL,RELA,RELB,RHOB,RHOJ,RHOQ,RHOT1,RHOU,RND3,RRAS2,SERPINE1,SP1,TGFB2,TGFB3,TLR4,TNFRSF1A,TNFSF13B,VCAM1
129	Wound Healing Signaling Pathway	5.62	0.282	2.73	ACTA2,ACVR2A,BMPR2,CHUK,COL12A1,COL15A1,COL16A1,COL1A1,COL3A1,COL4A2,COL4A5,COL5A2,COL6A1,COL6A2,COL6A3,COL8A1,Eda,EGFR,FGF2,FGF7,FGFR2,FN1,FOS,GRB2,IFNGR1,IFNGR2,IL17D,IL1R1,IL1RAP,IL33,IL6,ITGB1,JAK1,JAK2,JUN,LAMA2,LAMB1,LAMC1,MAP2K1,MAP2K4,MAP2K5,MAP3K14,MAPK1,MAPK3,MAPK8,MAPK9,NFKB1,NFKB2,NFKBIA,NFKBIB,NRAS,PDGFD,PRKCA,RALB,RAP1B,RAP2A,RAP2B,RRAS2,SHC1,SHC2,SOS2,TGFB2,TGFBR2,TGFBR3,TNFRSF1A,T…			Wound Healing Signaling Pathway	6.13	0.218	2.832	ACTA2,ACVR1,BMPR2,CEBPB,COL12A1,COL15A1,COL1A1,COL1A2,COL3A1,COL4A1,COL4A2,COL4A3,COL4A4,COL4A5,COL6A1,COL6A2,COL6A6,FGFR2,FN1,FOS,HBEGF,HRAS,IFNGR2,IL1R1,IL33,ITGB1,JUN,LAMA2,LAMB1,LAMC1,MAP2K1,MAP2K2,MAP2K3,MAPK3,PDGFA,PDGFD,PRKCA,RAF1,RALB,RAP1A,RAP1B,RRAS,RRAS2,SHC1,TGFB1,TGFB2,TGFB3,TGFBR1,TGFBR3,TNFRSF11B,TNFRSF1A,TNFSF12,TNFSF13B,VEGFB,VEGFD				Wound Healing Signaling Pathway	3.88	0.266	-5.009	ACTA2,ACVR1,ACVR2A,BMPR2,CEBPB,CHUK,COL1A1,COL1A2,COL3A1,COL4A5,COL4A6,COL5A1,COL6A1,COL6A2,COL8A1,Eda,EGFR,FGF2,FGF7,FGFR2,FOS,GRB2,HBEGF,IFNGR2,IL1R1,IL1RAP,IL33,ITGB1,JAK1,JAK2,KRAS,LAMB1,LAMC1,MAP2K1,MAP2K3,MAP2K4,MAP2K5,MAP3K14,MAPK1,MAPK8,NFKB1,NFKB2,NRAS,PDGFA,PDGFD,PRKCA,RAC1,RALA,RALB,RAP1A,RAP1B,RAP2A,RAP2B,RRAS2,SHC1,SHC2,SOS1,SOS2,TGFB2,TGFB3,TGFBR2,TNFRSF1A,TNFSF13B,VEGFB,VEGFC,VEGFD…
130	Opioid Signaling Pathway	5.6	0.275	3.201	ADCY5,AKT3,AP2A2,Ap2b1,BRAF,CACNA1A,CACNA1C,Calm1 (includes others),CAMK1D,CAMK2D,CDKN1B,CLTB,CLTC,CREB1,CREB3,CREB3L2,CREB5,CREBBP,EP300,FOS,FOSB,FYN,GNA12,GNAI2,GNAI3,GNAO1,GNAQ,GNB4,GNG10,GNG11,GNG12,GNG5,GRK5,GSK3B,GUCY1A1,GUCY1B1,ITPR2,MAP2K1,MAP2K4,MAP2K5,MAPK1,MAPK3,MAPK6,MYC,NFKB1,NFKB2,NFKBIA,NRAS,PDE1A,PENK,PLCB1,PPP3CA,PPP3CB,PRKACB,PRKAG1,PRKAG2,PRKCA,PRKCE,PRKCI,PRKD1,PRKD3,RALB,RAP1…			Opioid Signaling Pathway	4.39	0.193	2.714	ADCY7,AKT1,AKT2,AKT3,AP2A1,AP2S1,ATF2,BAD,CACNA1A,CACNA1C,Calm1 (includes others),CAMK1D,CAMK2D,CLTA,CLTB,CLTC,CREB3L1,CREB3L2,CREB5,CTNNB1,EP300,FOS,FOSB,GNA13,GNAS,GNB1,GNB2,GNB4,GNG10,GNG5,GRINA,GSK3B,GUCY1A1,HRAS,ITPR1,MAP2K1,MAP2K2,MAP2K3,MAPK3,PDE1A,PPP3CB,PPP3R1,PRKAR1A,PRKCA,RAF1,RALB,RAP1A,RAP1B,RPS6KB1,RRAS,RRAS2,SCN7A,SIGMAR1,TCF4				Opioid Signaling Pathway	7.66	0.307	-3.973	ADCY7,AKT1,AKT2,AKT3,AP2A2,Ap2b1,AP2M1,ARRB1,ATF2,ATF4,BRAF,CACNA1A,CACNA2D1,Calm1 (includes others),CAMK1,CAMK1D,CAMK2D,CDKN1B,CLTB,CLTC,CREB1,CREB3,CREB3L1,CREB3L2,CREB5,CREBBP,CTNNB1,EP300,FOS,FOSB,GNA11,GNA12,GNA13,GNAI1,GNAI2,GNAI3,GNAO1,GNAQ,GNAS,GNB4,GNG11,GNG12,GNG5,GRK5,GSK3B,GUCY1A1,ITPR1,ITPR2,KRAS,MAP2K1,MAP2K3,MAP2K4,MAP2K5,MAPK1,MAPK6,NFKB1,NFKB2,NRAS,PDE1A,PLCB1,PPP3CA,PPP3CB,PRKAC…
131	GM-CSF Signaling	5.59	0.4	3.8	AKT3,BCL2L1,CAMK2D,GRB2,JAK2,MAP2K1,MAPK1,MAPK3,NRAS,PIK3C2A,PIK3CA,PIK3R1,PIK3R2,PIM1,PPP3CA,PPP3CB,PTPN11,RACK1,RALB,RAP1B,RAP2A,RAP2B,RRAS2,RUNX1,SHC1,SOS2,STAT3,STAT5B			GM-CSF Signaling	4.81	0.3	3.441	AKT1,AKT2,AKT3,BCL2L1,CAMK2D,HRAS,MAP2K1,MAP2K2,MAPK3,PIK3C2A,PIK3R2,PPP3CB,PPP3R1,PTPN11,RAF1,RALB,RAP1A,RAP1B,RRAS,RRAS2,SHC1				GM-CSF Signaling	6.31	0.429	-3.402	AKT1,AKT2,AKT3,CAMK2D,ETS1,GRB2,JAK2,KRAS,MAP2K1,MAPK1,NRAS,PIK3C2A,PIK3CA,PPP3CA,PPP3CB,PTPN11,RACK1,RALA,RALB,RAP1A,RAP1B,RAP2A,RAP2B,RRAS2,RUNX1,SHC1,SOS1,SOS2,STAT3,STAT5B
132	PAK Signaling	5.59	0.342	3.656	ARHGAP10,ARHGEF6,CFL2,EPHA3,GRB2,ITGA1,ITGA5,ITGA9,ITGAV,ITGB1,ITGB5,ITGB8,MAP2K1,MAP2K4,MAPK1,MAPK3,MAPK8,MAPK9,MYL6,MYL9,NCK1,NRAS,PAK2,PAK3,PDGFD,PDGFRA,PDGFRB,PIK3C2A,PIK3CA,PIK3R1,PIK3R2,PTK2,PXN,RALB,RAP1B,RAP2A,RAP2B,RRAS2,SHC1,SOS2			PAK Signaling	5.04	0.256	4.2	CFL1,CFL2,HRAS,ITGA8,ITGAV,ITGB1,ITGB5,MAP2K1,MAP2K2,MAPK3,MYL12A,MYL12B,MYL6,MYL9,NCK1,PAK3,PDGFA,PDGFD,PDGFRA,PIK3C2A,PIK3R2,PTK2,PXN,RAF1,RALB,RAP1A,RAP1B,RRAS,RRAS2,SHC1				PAK Signaling	4.73	0.333	-2.475	ARHGAP10,ARHGEF6,CFL1,GRB2,ITGA1,ITGA9,ITGAV,ITGB1,ITGB5,ITGB8,KRAS,MAP2K1,MAP2K4,MAPK1,MAPK8,MYL9,NCK1,NRAS,PAK1IP1,PAK2,PAK3,PDGFA,PDGFD,PDGFRB,PIK3C2A,PIK3CA,PTK2,PXN,RAC1,RALA,RALB,RAP1A,RAP1B,RAP2A,RAP2B,RRAS2,SHC1,SOS1,SOS2
133	MHC class II antigen presentation	5.52	0.333	2.777	ACTR10,ACTR1B,AP1G1,AP1S2,AP2A2,CANX,CAPZA1,CAPZA2,CAPZB,CLTC,CTSA,CTSB,CTSD,CTSF,CTSH,CTSK,CTSO,CTSV,DCTN2,DCTN4,DNM1,DNM2,DNM3,DYNC1H1,DYNC1LI2,DYNLL1,KIFAP3,KLC1,LGMN,OSBPL1A,RAB7A,SEC23A,SEC24A,SEC24B,SEC24C,SEC24D,SEC31A,TUBA1A,TUBA1B,TUBA1C,TUBB2A,TUBB4B			MHC class II antigen presentation	7.7	0.294	4.439	ACTR10,ACTR1A,AP1S1,AP1S2,AP2A1,AP2S1,CAPZA1,CAPZA2,CLTA,CLTC,CTSA,CTSB,CTSD,CTSF,CTSH,CTSK,CTSO,CTSV,DCTN1,DCTN2,DCTN3,DCTN6,DNM1,DYNC1H1,KIF2A,KIF5B,LGMN,OSBPL1A,RAB7A,SAR1B,SEC23A,SEC24D,TUBA1B,TUBA1C,TUBB2A,TUBB2B,TUBB4B				MHC class II antigen presentation	5.04	0.333	-2.16	ACTR10,AP1G1,AP1S1,AP2A2,AP2M1,ARF1,CANX,CAPZA1,CAPZB,CLTC,CTSA,CTSF,CTSH,CTSK,CTSO,DCTN2,DCTN4,DCTN6,DNM1L,DNM2,DNM3,DYNC1LI2,DYNLL1,DYNLL2,KIF2A,KIF5B,KIFAP3,KLC1,LGMN,OSBPL1A,RAB7A,SEC13,SEC23A,SEC24A,SEC24B,SEC24C,SEC24D,SEC31A,TUBA1C,TUBB2A,TUBB4B,TUBB6
134	Melanocyte Development and Pigmentation Signaling	5.46	0.357	3.536	ADCY5,BCL2,CREB1,CREB3,CREB3L2,CREB5,CREBBP,CRK,EP300,GRB2,GUCY1A1,GUCY1B1,KITLG,MAP2K1,MAPK1,MAPK3,MITF,NRAS,PIK3C2A,PIK3CA,PIK3R1,PIK3R2,PRKACB,PRKAG1,PRKAG2,PTPN11,RALB,RAP1B,RAP2A,RAP2B,RPS6KA3,RPS6KB1,RRAS2,SHC1,SOS2			Melanocyte Development and Pigmentation Signaling	4.27	0.255	4.264	ADCY7,ATF2,CREB3L1,CREB3L2,CREB5,CRK,EP300,GNAS,GUCY1A1,HRAS,MAP2K1,MAP2K2,MAPK3,PIK3C2A,PIK3R2,PRKAR1A,PTPN11,RAF1,RALB,RAP1A,RAP1B,RPS6KB1,RRAS,RRAS2,SHC1				Melanocyte Development and Pigmentation Signaling	6.44	0.388	-4.564	ADCY7,ATF2,ATF4,BCL2,CREB1,CREB3,CREB3L1,CREB3L2,CREB5,CREBBP,CRK,EP300,GNAS,GRB2,GUCY1A1,KRAS,MAP2K1,MAPK1,MITF,NRAS,PIK3C2A,PIK3CA,PRKACA,PRKACB,PRKAG1,PRKAG2,PTPN11,RALA,RALB,RAP1A,RAP1B,RAP2A,RAP2B,RPS6KB1,RRAS2,SHC1,SOS1,SOS2
135	UVA-Induced MAPK Signaling	5.46	0.357	2.683	BCL2L1,CYCS,EGFR,FOS,JUN,MAP2K4,MAPK1,MAPK14,MAPK3,MAPK8,MAPK9,NRAS,PARP3,PARP4,PARP8,PDIA3,PIK3C2A,PIK3CA,PIK3R1,PIK3R2,PLCB1,PLCB4,PLCE1,PLCL1,PRKCA,RALB,RAP1B,RAP2A,RAP2B,RPS6KA3,RPS6KB1,RRAS2,TNKS,TNKS2,TP53			UVA-Induced MAPK Signaling	2.63	0.214	2.496	BCL2L1,CYCS,FOS,HRAS,JUN,MAPK3,PDIA3,PIK3C2A,PIK3R2,PLCB4,PLCL1,PRKCA,RALB,RAP1A,RAP1B,RPS6KB1,RRAS,RRAS2,SMPD3,TNKS,TP53				UVA-Induced MAPK Signaling	3.81	0.327	-2.357	EGFR,FOS,KRAS,MAP2K4,MAPK1,MAPK14,MAPK8,NRAS,PARP14,PARP3,PARP4,PARP8,PDIA3,PIK3C2A,PIK3CA,PLCB1,PLCE1,PLCL1,PRKCA,RALA,RALB,RAP1A,RAP1B,RAP2A,RAP2B,RPS6KB1,RRAS2,SMPD1,TIPARP,TNKS,TNKS2,TP53
136	HEY1 Signaling Pathway	5.42	0.311	4.808	ACVR2A,AKT3,APH1A,ARNT,BMP4,BMPR1A,BMPR2,CDKN1A,EGFR,ERBB4,GAB1,GRB2,HDAC1,HIF1A,IL6,MMP14,MMP19,MMP2,MMP23B,MMP3,MYH11,NCOR1,NCSTN,NFATC1,NR2F2,NTRK3,PIK3C2A,PIK3CA,PIK3R1,PIK3R2,PINK1,PRKAG1,PRKAG2,PSEN2,RBPJ,SIN3A,SIRT1,SMAD1,SMAD3,SMAD4,SMAD5,SMAD7,TGFB2,TGFBR2,TGFBR3,TP53,VEGFA,VEGFB,VEGFC,VEGFD			HEY1 Signaling Pathway	3.41	0.205	4.004	ACVR1,AKT1,AKT2,AKT3,APH1A,AR,BAX,BMP1,BMPR1A,BMPR2,CDKN1A,GATA6,HIF1A,MEF2C,MFAP5,MMP2,MMP23B,MYH11,NCSTN,PIK3C2A,PIK3R2,PSENEN,SMAD3,SMAD4,SMAD7,TGFB1,TGFB2,TGFB3,TGFBR1,TGFBR3,TP53,VEGFB,VEGFD				HEY1 Signaling Pathway	7.62	0.354	-4.106	ACVR1,ACVR2A,ACVRL1,AKT1,AKT2,AKT3,APH1A,AR,ARNT,BMP4,BMPR1A,BMPR2,CDKN1A,EGFR,GAB1,GATA6,GRB2,HDAC1,HIF1A,JAG1,MEF2C,MFAP5,MMP14,MMP16,MMP19,MMP2,MMP23B,MMP3,MYH11,NCOR1,NCOR2,NELFB,NFATC1,NOTCH2,PIK3C2A,PIK3CA,PINK1,PRKAB2,PRKAG1,PRKAG2,PSEN1,PSEN2,PSENEN,RBPJ,SIRT1,SMAD1,SMAD3,SMAD4,SMAD5,SMAD7,TGFB2,TGFB3,TGFBR2,TP53,VEGFB,VEGFC,VEGFD
137	GŒ±q Signaling	5.39	0.306	2.967	AKT3,ARHGEF25,Calm1 (includes others),Cdc42,CHP1,CHUK,FNBP1,GNA12,GNAI2,GNAI3,GNAO1,GNAQ,GNB4,GNG10,GNG11,GNG12,GNG5,GSK3B,HMOX1,ITPR2,MAP2K1,MAPK1,MAPK3,NFATC1,NFKB1,NFKB2,NFKBIA,NFKBIB,PIK3C2A,PIK3CA,PIK3R1,PIK3R2,PLCB1,PLCB4,PLD1,PLD3,PPP3CA,PPP3CB,PRKCA,PRKCE,PRKCI,PRKD1,PRKD3,RELB,RHOA,RHOB,RHOC,RHOJ,RHOQ,RHOT1,ROCK1,ROCK2			GŒ±q Signaling	3.29	0.2	2.043	AKT1,AKT2,AKT3,Calm1 (includes others),CHP1,CSK,GNA13,GNAS,GNB1,GNB2,GNB4,GNG10,GNG5,GSK3B,ITPR1,MAP2K1,MAP2K2,MAPK3,NFATC3,PIK3C2A,PIK3R2,PLCB4,PPP3CB,PPP3R1,PRKCA,RAF1,RHOA,RHOBTB1,RHOC,RHOJ,RHOQ,RND3,ROCK1,ROCK2				GŒ±q Signaling	3.89	0.288	-4.218	AKT1,AKT2,AKT3,ARHGEF25,Calm1 (includes others),CHUK,FNBP1,GNA11,GNA12,GNA13,GNAI1,GNAI2,GNAI3,GNAO1,GNAQ,GNAS,GNB4,GNG11,GNG12,GNG5,GSK3B,HMOX1,ITPR1,ITPR2,MAP2K1,MAPK1,NFATC1,NFKB1,NFKB2,PIK3C2A,PIK3CA,PLCB1,PPP3CA,PPP3CB,PRKCA,PRKCE,PRKCI,RAC1,REL,RELA,RELB,RHOB,RHOJ,RHOQ,RHOT1,RHOU,RND3,ROCK1,ROCK2
138	GDNF Family Ligand-Receptor Interactions	5.28	0.382	2.353	CREB1,FOS,FRS2,GAB1,GFRA2,GRB2,IRS2,ITPR2,JUN,MAP2K1,MAP2K4,MAPK1,MAPK3,MAPK8,MAPK9,NCK1,NRAS,PIK3C2A,PIK3CA,PIK3R1,PIK3R2,RALB,RAP1B,RAP2A,RAP2B,RASA1,RRAS2,SHC1,SOS2			GDNF Family Ligand-Receptor Interactions	3.73	0.263	2.668	FOS,GFRA2,HRAS,ITPR1,JUN,MAP2K1,MAP2K2,MAPK3,NCK1,PDLIM7,PIK3C2A,PIK3R2,RAF1,RALB,RAP1A,RAP1B,RASA1,RRAS,RRAS2,SHC1				GDNF Family Ligand-Receptor Interactions	5.93	0.408	-2.746	CREB1,FOS,FRS2,GAB1,GRB2,IRS1,IRS2,ITPR1,ITPR2,KRAS,MAP2K1,MAP2K4,MAPK1,MAPK8,NCK1,NRAS,PDLIM7,PIK3C2A,PIK3CA,RAC1,RALA,RALB,RAP1A,RAP1B,RAP2A,RAP2B,RASA1,RRAS2,SHC1,SOS1,SOS2
139	Transcriptional regulation of white adipocyte differentiation	5.25	0.369	3.053	ANGPTL4,CARM1,CCND3,CDK19,CDK8,CEBPD,CHD9,CREBBP,EBF1,EP300,FABP4,FAM120B,HDAC3,KLF4,MED13,MED13L,MED14,MED15,MED31,MED6,NCOA1,NCOA2,NCOA3,NCOR1,NFKB1,NR2F2,RXRA,TBL1X,TBL1XR1,THRAP3,ZNF638			Transcriptional regulation of white adipocyte differentiation	4.01	0.262	2.985	ANGPTL4,CCNC,CCND3,CDK4,CDK8,CEBPB,EP300,FABP4,KLF4,LPL,MED10,MED13,MED13L,MED14,MED21,MED25,MED30,MED31,MED6,TBL1XR1,TGFB1,THRAP3				Transcriptional regulation of white adipocyte differentiation	6.89	0.417	-4.226	ANGPTL4,CARM1,CCNC,CDK4,CDK8,CEBPB,CEBPD,CHD9,CREBBP,EBF1,EP300,FAM120B,HDAC3,HELZ2,KLF4,LPL,MED1,MED10,MED13,MED14,MED6,MED8,NCOA1,NCOA2,NCOA3,NCOR1,NCOR2,NFKB1,RELA,RXRA,TBL1X,TBL1XR1,TGS1,THRAP3,ZNF638
140	Endothelin-1 Signaling	5.24	0.294	3.983	ADCY5,BRAF,CASP4,ECE1,EDNRA,FOS,GAB1,GNA12,GNAI2,GNAI3,GNAO1,GNAQ,GRB2,GUCY1A1,GUCY1A2,GUCY1B1,HMOX1,ITPR2,JUN,MAPK1,MAPK14,MAPK3,MAPK6,MAPK8,MAPK9,MYC,NPR1,NPR2,NRAS,PDIA3,PIK3C2A,PIK3CA,PIK3R1,PIK3R2,PLA2G12A,PLCB1,PLCB4,PLCE1,PLCL1,PLD1,PLD3,PNPLA8,PRDX6,PRKCA,PRKCE,PRKCI,PRKD1,PRKD3,PTGS1,PTGS2,RALB,RAP1B,RAP2A,RAP2B,RRAS2,SHC1,SHC2			Endothelin-1 Signaling	1.4	0.155	2.502	ADCY7,CASP4,FOS,GNA13,GNAS,GUCY1A1,HRAS,ITPR1,JUN,MAPK3,NPR2,PDIA3,PIK3C2A,PIK3R2,PLA2G12A,PLA2G4A,PLCB4,PLCL1,PNPLA2,PNPLA8,PRDX6,PRKCA,PTGS1,RAF1,RALB,RAP1A,RAP1B,RRAS,RRAS2,SHC1				Endothelin-1 Signaling	2.74	0.258	-4.23	ADCY7,ARAF,BRAF,ECE1,FOS,GAB1,GNA11,GNA12,GNA13,GNAI1,GNAI2,GNAI3,GNAO1,GNAQ,GNAS,GRB2,GUCY1A1,GUCY1A2,HMOX1,ITPR1,ITPR2,KRAS,MAPK1,MAPK14,MAPK6,MAPK8,NPR2,NRAS,PDIA3,PIK3C2A,PIK3CA,PLAAT3,PLCB1,PLCE1,PLCL1,PNPLA8,PRDX6,PRKCA,PRKCE,PRKCI,RALA,RALB,RAP1A,RAP1B,RAP2A,RAP2B,RRAS2,SHC1,SHC2,SOS1
141	L1CAM interactions	5.2	0.328	2.03	ACTB,ACTG1,ALCAM,Ank2,AP2A2,CLTC,CNTN6,CSNK2A1,CSNK2A2,DLG1,DNM1,DNM2,DNM3,DPYSL2,EGFR,FGFR1,HSPA8,ITGA1,ITGA5,ITGA9,ITGAV,ITGB1,LAMB1,LAMC1,MAP2K1,MAPK1,MAPK3,NCAM1,NRP1,RANBP9,RDX,RPS6KA3,SCN1B,SCN7A,SPTAN1,SPTBN1,TUBA1A,TUBA1B,TUBA1C,TUBB2A,TUBB4B			L1CAM interactions	4.87	0.248	2.694	ACTG1,AP2A1,AP2S1,CLTA,CLTC,CSNK2A1,CSNK2B,DNM1,DPYSL2,FGFR1,HSPA8,ITGAV,ITGB1,LAMB1,LAMC1,MAP2K1,MAP2K2,MAPK3,NCAM1,NRP1,RANBP9,SCN1B,SCN7A,SDCBP,SPTAN1,SPTBN1,TUBA1B,TUBA1C,TUBB2A,TUBB2B,TUBB4B				L1CAM interactions	3.02	0.288	-3.333	ACTG1,ALCAM,Ank2,AP2A2,AP2M1,CLTC,CNTN6,CSNK2A1,CSNK2A2,DLG1,DLG4,DNM1L,DNM2,DNM3,DPYSL2,EGFR,FGFR1,ITGA1,ITGA9,ITGAV,ITGB1,LAMB1,LAMC1,MAP2K1,MAPK1,NRP1,NUMB,RAC1,RANBP9,SCN1B,SCN7A,SPTAN1,TUBA1C,TUBB2A,TUBB4B,TUBB6
142	CCR3 Signaling in Eosinophils	5.15	0.321	3.266	Calm1 (includes others),CFL2,GNA12,GNAI2,GNAI3,GNAO1,GNAQ,GNB4,GNG10,GNG11,GNG12,GNG5,ITPR2,MAP2K1,MAPK1,MAPK14,MAPK3,MPRIP,NRAS,PAK2,PAK3,PIK3C2A,PIK3CA,PIK3R1,PIK3R2,PLA2G12A,PLCB1,PLCB4,PPP1CB,Ppp1r12b,PRKCA,PRKCE,PRKCI,PRKD1,PRKD3,RALB,RAP1B,RAP2A,RAP2B,RHOA,ROCK1,ROCK2,RRAS2			CCR3 Signaling in Eosinophils	4.65	0.239	3.3	Calm1 (includes others),CFL1,CFL2,GNA13,GNAS,GNB1,GNB2,GNB4,GNG10,GNG5,HRAS,ITPR1,MAP2K1,MAP2K2,MAPK3,PAK3,PIK3C2A,PIK3R2,PLA2G12A,PLA2G4A,PLCB4,PPP1CB,PRKCA,RAF1,RALB,RAP1A,RAP1B,RHOA,ROCK1,ROCK2,RRAS,RRAS2				CCR3 Signaling in Eosinophils	5.06	0.328	-2.985	Calm1 (includes others),CFL1,GNA11,GNA12,GNA13,GNAI1,GNAI2,GNAI3,GNAO1,GNAQ,GNAS,GNB4,GNG11,GNG12,GNG5,ITPR1,ITPR2,KRAS,MAP2K1,MAPK1,MAPK14,MPRIP,NRAS,PAK2,PAK3,PIK3C2A,PIK3CA,PLCB1,PPP1CB,PPP1R12A,Ppp1r12b,PRKCA,PRKCE,PRKCI,RAC1,RALA,RALB,RAP1A,RAP1B,RAP2A,RAP2B,ROCK1,ROCK2,RRAS2
143	3-phosphoinositide Biosynthesis	5.13	0.287	4.901	ACP1,ATP1A1,CILP,DOT1L,DUSP16,EYA4,IGBP1,MTMR2,MTMR6,NT5C,OCRL,PAWR,PI4K2A,PI4K2B,PI4KA,PIK3C2A,PIK3CA,PIK3R1,PIK3R2,PIKFYVE,PIP4K2A,PIP4K2C,PIP5K1A,PPFIA1,PPFIBP2,PPP1CA,PPP1CB,Ppp1cc,PPP1R12C,PPP1R7,PPP2CA,PPP2CB,PPP2R2A,PPP2R3A,PPP2R5A,PPP2R5E,PPP3CA,PPP3CB,PPTC7,PTPN1,PTPN11,PTPN12,PTPN2,PTPRJ,PTPRM,RASA1,RNGTT,SACM1L,SET,SGPP1,SIRPA,SOCS3,SSH1,SSH2,STYX,SYNJ1,SYNJ2,TNS3,UBLCP1,WBP11			3-phosphoinositide Biosynthesis	0.896	0.139	4.491	ATP1A1,CILP,ILKAP,MDP1,MTMR6,NT5C,NUDT3,NUDT9,PIK3C2A,PIK3R2,PPP1CA,PPP1CB,Ppp1cc,PPP1R10,PPP1R12C,PPP1R14A,PPP1R14B,PPP2CA,PPP3CB,PPP3R1,PPP4C,PPP5C,PTEN,PTPN11,PTPN12,RASA1,SET,SIRPA,TNS3				3-phosphoinositide Biosynthesis	5.18	0.297	-4.714	ACP1,ATP1A2,CILP,DOT1L,DUSP11,DUSP16,DUSP5,DUSP8,EYA4,IGBP1,MTMR2,OCRL,PAWR,PI4K2A,PI4K2B,PI4KA,PIK3C2A,PIK3CA,PIKFYVE,PIP4K2A,PIP4K2C,PIP5K1A,PPFIA1,PPFIBP2,PPP1CA,PPP1CB,Ppp1cc,PPP1R10,PPP1R11,PPP1R12A,PPP1R12C,PPP1R7,PPP2CA,PPP2CB,PPP2R1A,PPP2R2A,PPP2R3A,Ppp2r3d,PPP2R5A,PPP2R5E,PPP3CA,PPP3CB,PPTC7,PTPA,PTPN1,PTPN11,PTPN12,PTPN2,PTPRM,RASA1,RNGTT,SACM1L,SET,SGPP1,SIRPA,SSH1,SSH2,STYX,SYNJ2,TNS3…
144	ABC-family proteins mediated transport	5.13	0.347	3.212	ABCA6,ABCA8,ABCA9,ABCB7,ABCC1,ABCC5,ABCC9,ABCD3,ABCF1,EIF2S1,EIF2S2,EIF2S3,ERLEC1,OS9,PEX3,PSMA6,PSMB4,PSMB7,PSMC1,PSMC3,PSMD1,PSMD11,PSMD12,PSMD13,PSMD2,PSMD3,PSMD4,PSMD7,PSMD8,PSME2,PSME4,SEL1L,SEM1,UBC,VCP			ABC-family proteins mediated transport	12.9	0.396	6.008	ABCA6,ABCA8,ABCA9,ABCC5,ABCC9,ABCF1,DERL2,EIF2S1,ERLEC1,PEX19,PSMA1,PSMA2,PSMA3,PSMA5,PSMA6,PSMA7,PSMB1,PSMB2,PSMB3,PSMB4,PSMB5,PSMB6,PSMB7,PSMC1,PSMC2,PSMC4,PSMC5,PSMC6,PSMD12,PSMD13,PSMD3,PSMD4,PSMD6,PSMD7,PSMD8,PSMD9,PSME2,PSME4,RPS27A,UBC				ABC-family proteins mediated transport	4.3	0.337	-3.43	ABCA6,ABCA8,ABCA9,ABCB7,ABCC5,ABCD3,EIF2S1,EIF2S2,EIF2S3,ERLEC1,OS9,PEX3,PSMA1,PSMA7,PSMB10,PSMB4,PSMB7,PSMB8,PSMC3,PSMC6,PSMD1,PSMD11,PSMD12,PSMD2,PSMD3,PSMD4,PSMD6,PSMD9,PSME1,PSME4,SEL1L,SEM1,UBC,VCP
145	Superpathway of Inositol Phosphate Compounds	5.09	0.278	5.515	ACP1,ATP1A1,CILP,DOT1L,DUSP16,EYA4,IGBP1,IP6K1,MTMR2,MTMR6,NT5C,OCRL,PAWR,PI4K2A,PI4K2B,PI4KA,PIK3C2A,PIK3CA,PIK3R1,PIK3R2,PIKFYVE,PIP4K2A,PIP4K2C,PIP4P1,PIP4P2,PIP5K1A,PLCB1,PLCB4,PLCE1,PPFIA1,PPFIBP2,PPP1CA,PPP1CB,Ppp1cc,PPP1R12C,PPP1R7,PPP2CA,PPP2CB,PPP2R2A,PPP2R3A,PPP2R5A,PPP2R5E,PPP3CA,PPP3CB,PPTC7,PTPN1,PTPN11,PTPN12,PTPN2,PTPRJ,PTPRM,RASA1,RNGTT,SACM1L,SET,SGPP1,SIRPA,SOCS3,SSH1,SSH2,STYX,…			Superpathway of Inositol Phosphate Compounds	0.834	0.135	4.426	ATP1A1,CILP,ILKAP,MDP1,MTMR6,NT5C,NUDT3,NUDT9,PIK3C2A,PIK3R2,PIP4P1,PIP4P2,PLCB4,PPP1CA,PPP1CB,Ppp1cc,PPP1R10,PPP1R12C,PPP1R14A,PPP1R14B,PPP2CA,PPP3CB,PPP3R1,PPP4C,PPP5C,PTEN,PTPN11,PTPN12,RASA1,SET,SIRPA,TNS3				Superpathway of Inositol Phosphate Compounds	5.07	0.287	-5.345	ACP1,ATP1A2,CILP,DOT1L,DUSP11,DUSP16,DUSP5,DUSP8,EYA4,IGBP1,IP6K1,ITPKB,MTMR2,OCRL,PAWR,PI4K2A,PI4K2B,PI4KA,PIK3C2A,PIK3CA,PIKFYVE,PIP4K2A,PIP4K2C,PIP4P1,PIP4P2,PIP5K1A,PLCB1,PLCE1,PPFIA1,PPFIBP2,PPP1CA,PPP1CB,Ppp1cc,PPP1R10,PPP1R11,PPP1R12A,PPP1R12C,PPP1R7,PPP2CA,PPP2CB,PPP2R1A,PPP2R2A,PPP2R3A,Ppp2r3d,PPP2R5A,PPP2R5E,PPP3CA,PPP3CB,PPTC7,PTPA,PTPN1,PTPN11,PTPN12,PTPN2,PTPRM,RASA1,RNGTT,SACM1L,SET…
146	Deadenylation-dependent mRNA decay	5.09	0.418	2.294	CNOT1,CNOT2,CNOT3,CNOT4,CNOT6,CNOT6L,CNOT7,DDX6,EIF4A1,EIF4A2,EIF4B,EIF4G1,EXOSC1,EXOSC5,HBS1L,LSM6,LSM7,PABPC1,PAN3,TNKS1BP1,TUT4,TUT7,XRN1			Deadenylation-dependent mRNA decay	7.48	0.4	2.985	CNOT2,CNOT4,CNOT6L,CNOT7,EIF4A1,EIF4A2,EIF4A3,EIF4E,EIF4G1,EXOSC4,EXOSC5,EXOSC8,LSM1,LSM2,LSM3,LSM4,LSM5,LSM7,NT5C3B,PABPC1,PAIP1,TUT7				Deadenylation-dependent mRNA decay	5.34	0.436	-2.858	CNOT1,CNOT10,CNOT4,CNOT6,CNOT6L,DDX6,EIF4A1,EIF4A2,EIF4A3,EIF4B,EIF4E,EIF4G1,EXOSC5,EXOSC7,EXOSC8,HBS1L,LSM3,LSM4,PABPC1,PAN3,TNKS1BP1,TUT4,TUT7,XRN1
147	Orexin Signaling Pathway	5.02	0.277	3.939	ADCY5,AKT1S1,AKT3,ATP6AP2,ATP6V0A1,ATP6V0B,ATP6V0C,ATP6V0D1,ATP6V0E1,ATP6V1A,ATP6V1B2,ATP6V1D,ATP6V1E1,ATP6V1F,ATP6V1H,BMPR1A,CACNA1A,CACNA1C,Calm1 (includes others),FOXO1,GNAQ,GNB4,GNG10,GNG11,GNG12,GNG5,GUCY1A1,GUCY1B1,HIF1A,IL6,ITPR2,MAPK1,MAPK14,MAPK3,NFKB1,NFKB2,PDIA3,PI4KA,PIK3C2A,PIK3CA,PIK3R1,PIK3R2,PIKFYVE,PIP4K2A,PIP4K2C,PIP5K1A,PLA2G12A,PLCB1,PLCB4,PLCE1,PLCL1,PLD1,PRKACB,PRKAG1,PRKAG2…			Orexin Signaling Pathway	1.63	0.155	2.795	ADCY7,AKT1,AKT2,AKT3,ATP6AP2,ATP6V0E1,ATP6V1A,ATP6V1C1,ATP6V1D,ATP6V1F,ATP6V1G1,ATP6V1H,BMPR1A,CACNA1A,CACNA1C,Calm1 (includes others),GNAS,GNB1,GNB2,GNB4,GNG10,GNG5,GUCY1A1,HIF1A,ITPR1,MAPK3,PDIA3,PIK3C2A,PIK3R2,PLA2G12A,PLA2G4A,PLCB4,PLCL1,PRKAR1A,PRKCA,PTPN11,SMAD4				Orexin Signaling Pathway	1.9	0.231	-4.18	ADCY7,AKT1,AKT1S1,AKT2,AKT3,ATP6AP2,ATP6V0D1,ATP6V0E1,ATP6V1A,ATP6V1B2,ATP6V1E1,ATP6V1H,BMPR1A,CACNA1A,CACNA2D1,Calm1 (includes others),GNAQ,GNAS,GNB4,GNG11,GNG12,GNG5,GUCY1A1,HIF1A,ITPR1,ITPR2,MAPK1,MAPK14,NFKB1,NFKB2,PDIA3,PI4KA,PIK3C2A,PIK3CA,PIKFYVE,PIP4K2A,PIP4K2C,PIP5K1A,PLCB1,PLCE1,PLCL1,PRKAB2,PRKACA,PRKACB,PRKAG1,PRKAG2,PRKCA,PRKCE,PRKCI,PTPN11,SLC8A1,SMAD1,SMAD4,SMAD5,TRPC1
148	FcŒ≥ Receptor-mediated Phagocytosis in Macrophages and Monocytes	5.01	0.351	3.656	ACTA2,ACTB,ACTG1,ACTR3,AKT3,ARPC1B,ARPC2,ARPC5,CRK,DOCK1,FYN,GAB2,HMOX1,MAPK1,MAPK3,MYO5A,NCK1,PIK3R1,PIK3R2,PIP5K1A,PLD1,PLD3,PRKCA,PRKCE,PRKCI,PRKD1,PRKD3,PXN,RAB11B,RPS6KB1,TLN1,TLN2,YES1			FcŒ≥ Receptor-mediated Phagocytosis in Macrophages and Monocytes	4.13	0.255	3.266	ACTA2,ACTG1,ACTR2,ACTR3,AKT1,AKT2,AKT3,ARPC1B,ARPC2,ARPC3,ARPC4,ARPC5,ARPC5L,CRK,GAB2,MAPK3,NCK1,PIK3R2,PRKCA,PTEN,PXN,RAB11A,RPS6KB1,VASP				FcŒ≥ Receptor-mediated Phagocytosis in Macrophages and Monocytes	4.2	0.34	-3.889	ACTA2,ACTG1,ACTR3,AKT1,AKT2,AKT3,ARPC1B,ARPC2,ARPC4,ARPC5,CBL,CRK,DOCK1,GAB2,HMOX1,MAPK1,MYO5A,NCK1,PIP5K1A,PRKCA,PRKCE,PRKCI,PXN,RAB11A,RAB11B,RAC1,RPS6KB1,TLN1,TLN2,VASP,VAV3,YES1
149	Oxidative Stress Induced Senescence	5.01	0.36	2.887	AGO3,CBX4,CBX6,CDKN2C,EZH2,FOS,JUN,MAP2K4,MAP3K5,MAP4K4,MAPK1,MAPK14,MAPK3,MAPK8,MAPK9,MAPKAPK2,MDM4,PHC2,PHC3,RBBP7,RNF2,SCMH1,SUZ12,TFDP1,TFDP2,TNRC6A,TNRC6B,TNRC6C,TP53,TXN,UBC			Oxidative Stress Induced Senescence	3.4	0.244	3.13	CBX6,CDK4,CDKN2D,FOS,JUN,KDM6B,MAP2K3,MAPK3,MAPKAPK2,RBBP4,RBBP7,RNF2,RPS27A,SCMH1,SUZ12,TFDP1,TFDP2,TNRC6C,TP53,TXN,UBC				Oxidative Stress Induced Senescence	3.78	0.337	-3.138	AGO3,CBX4,CBX6,CDK4,CDKN2C,EZH2,FOS,KDM6B,MAP2K3,MAP2K4,MAP3K5,MAP4K4,MAPK1,MAPK14,MAPK8,MAPKAPK2,MDM4,PHC2,PHC3,RBBP7,RNF2,SCMH1,SUZ12,TFDP1,TNRC6B,TNRC6C,TP53,TXN,UBC
150	NLR signaling pathways	4.93	0.411	2.711	APP,BCL2,BCL2L1,BIRC2,BIRC3,CASP4,CHUK,CYLD,HMOX1,HSP90AB1,IRAK1,ITCH,MAPK14,NFKB1,NFKB2,NOD1,RIPK2,SUGT1,TAB2,TNFAIP3,TXN,TXNIP,UBC			NLR signaling pathways	1.72	0.214	2.309	APP,BCL2L1,BIRC2,CASP4,HSP90AB1,IRAK1,RPS27A,SUGT1,TXN,UBC,UBE2N,UBE2V1				NLR signaling pathways	4.1	0.393	-2.985	APP,BCL2,CHUK,CYLD,HMOX1,HSP90AB1,IRAK1,ITCH,MAPK14,NFKB1,NFKB2,NOD1,PYCARD,RELA,RIPK2,SUGT1,TAB2,TXN,TXNIP,UBC,UBE2N,UBE2V1
151	TP53 Regulates Transcription of Cell Cycle Genes	4.9	0.429	2.837	BTG2,CARM1,CDKN1A,CDKN1B,CNOT1,CNOT2,CNOT3,CNOT4,CNOT6,CNOT6L,CNOT7,EP300,NPM1,PCBP4,PCNA,RBL2,TFDP1,TFDP2,TNKS1BP1,TP53,ZNF385A			TP53 Regulates Transcription of Cell Cycle Genes	4.31	0.327	2.5	BAX,BTG2,CDKN1A,CNOT2,CNOT4,CNOT6L,CNOT7,EP300,NPM1,PCBP4,PCNA,PLK2,PRMT1,TFDP1,TFDP2,TP53				TP53 Regulates Transcription of Cell Cycle Genes	3.53	0.388	-3.441	BTG2,CARM1,CDKN1A,CDKN1B,CNOT1,CNOT10,CNOT4,CNOT6,CNOT6L,EP300,GADD45A,PCBP4,PCNA,PLK2,PLK3,RBL2,TFDP1,TNKS1BP1,TP53
152	D-myo-inositol-5-phosphate Metabolism	4.88	0.286	4.619	ACP1,ATP1A1,CILP,DOT1L,DUSP16,EYA4,IGBP1,MTMR2,MTMR6,NT5C,OCRL,PAWR,PIKFYVE,PIP4K2A,PIP4K2C,PIP4P1,PIP4P2,PLCB1,PLCB4,PLCE1,PPFIA1,PPFIBP2,PPP1CA,PPP1CB,Ppp1cc,PPP1R12C,PPP1R7,PPP2CA,PPP2CB,PPP2R2A,PPP2R3A,PPP2R5A,PPP2R5E,PPP3CA,PPP3CB,PPTC7,PTPN1,PTPN11,PTPN12,PTPN2,PTPRJ,PTPRM,RASA1,RNGTT,SACM1L,SET,SGPP1,SIRPA,SOCS3,SSH1,SSH2,STYX,SYNJ1,SYNJ2,TNS3,UBLCP1,WBP11			D-myo-inositol-5-phosphate Metabolism	1.27	0.151	4.2	ATP1A1,CILP,ILKAP,MDP1,MTMR6,NT5C,NUDT3,NUDT9,PIP4P1,PIP4P2,PLCB4,PPP1CA,PPP1CB,Ppp1cc,PPP1R10,PPP1R12C,PPP1R14A,PPP1R14B,PPP2CA,PPP3CB,PPP3R1,PPP4C,PPP5C,PTEN,PTPN11,PTPN12,RASA1,SET,SIRPA,TNS3				D-myo-inositol-5-phosphate Metabolism	5.28	0.302	-5.105	ACP1,ATP1A2,CILP,DOT1L,DUSP11,DUSP16,DUSP5,DUSP8,EYA4,IGBP1,MTMR2,OCRL,PAWR,PIKFYVE,PIP4K2A,PIP4K2C,PIP4P1,PIP4P2,PLCB1,PLCE1,PPFIA1,PPFIBP2,PPP1CA,PPP1CB,Ppp1cc,PPP1R10,PPP1R11,PPP1R12A,PPP1R12C,PPP1R7,PPP2CA,PPP2CB,PPP2R1A,PPP2R2A,PPP2R3A,Ppp2r3d,PPP2R5A,PPP2R5E,PPP3CA,PPP3CB,PPTC7,PTPA,PTPN1,PTPN11,PTPN12,PTPN2,PTPRM,RASA1,RNGTT,SACM1L,SET,SGPP1,SIRPA,SSH1,SSH2,STYX,SYNJ2,TNS3,UBLCP1,WBP11
153	Ephrin B Signaling	4.8	0.375	2.837	ABI1,ACP1,AXIN1,CAP1,CFL2,CXCL12,GNA12,GNAI2,GNAI3,GNAO1,GNAQ,GNB4,GNG10,GNG11,GNG12,GNG5,HNRNPK,ITSN1,ITSN2,KALRN,MAPK1,MAPK3,PTK2,PXN,RHOA,ROCK1,ROCK2			Ephrin B Signaling	3.13	0.25	2.111	CFL1,CFL2,CTNNB1,GNA13,GNAS,GNB1,GNB2,GNB4,GNG10,GNG5,HNRNPK,HRAS,MAPK3,PTK2,PXN,RHOA,ROCK1,ROCK2				Ephrin B Signaling	6	0.417	-2.858	ABI1,ACP1,CAP1,CBL,CFL1,CTNNB1,CXCL12,GNA11,GNA12,GNA13,GNAI1,GNAI2,GNAI3,GNAO1,GNAQ,GNAS,GNB4,GNG11,GNG12,GNG5,ITSN1,ITSN2,KALRN,MAPK1,PTK2,PXN,RAC1,ROCK1,ROCK2,VAV3
154	Macropinocytosis Signaling	4.79	0.368	2.683	ABI1,ACTN4,ANKFY1,CSF1,ITGA5,ITGB1,ITGB5,ITGB8,NGF,NRAS,PDGFD,PIK3C2A,PIK3CA,PIK3R1,PIK3R2,PRKCA,PRKCE,PRKCI,PRKD1,PRKD3,RAB34,RAB5A,RALB,RAP1B,RAP2A,RAP2B,RHOA,RRAS2			Macropinocytosis Signaling	2.84	0.237	3.317	ACTN4,CSF1,HRAS,ITGB1,ITGB5,PDGFA,PDGFD,PIK3C2A,PIK3R2,PRKCA,RAB34,RAB5A,RALB,RAP1A,RAP1B,RHOA,RRAS,RRAS2				Macropinocytosis Signaling	3.99	0.355	-2.524	ABI1,ACTN4,ANKFY1,CSF1,ITGB1,ITGB5,ITGB8,KRAS,NGF,NRAS,PDGFA,PDGFD,PIK3C2A,PIK3CA,PRKCA,PRKCE,PRKCI,RAB34,RAB5A,RAC1,RALA,RALB,RAP1A,RAP1B,RAP2A,RAP2B,RRAS2
155	CNTF Signaling	4.78	0.404	3.128	CNTFR,GRB2,IL6ST,JAK1,JAK2,LIFR,MAP2K1,MAPK1,MAPK3,NRAS,PIK3C2A,PIK3CA,PIK3R1,PIK3R2,PTPN11,RALB,RAP1B,RAP2A,RAP2B,RPS6KA3,RPS6KB1,RRAS2,STAT3			CNTF Signaling	3.44	0.281	3.5	AKT1,HRAS,IL6ST,MAP2K1,MAP2K2,MAPK3,PIK3C2A,PIK3R2,PTPN11,RAF1,RALB,RAP1A,RAP1B,RPS6KB1,RRAS,RRAS2				CNTF Signaling	4.48	0.404	-3.128	AKT1,GRB2,IL6ST,JAK1,JAK2,KRAS,LIFR,MAP2K1,MAPK1,NRAS,PIK3C2A,PIK3CA,PTPN11,RALA,RALB,RAP1A,RAP1B,RAP2A,RAP2B,RPS6KB1,RRAS2,SOS1,STAT3
156	VEGF Family Ligand-Receptor Interactions	4.78	0.357	2.785	AKT3,FLT1,FOS,GRB2,MAP2K1,MAPK1,MAPK3,NRAS,NRP1,PIK3C2A,PIK3CA,PIK3R1,PIK3R2,PLA2G12A,PRKCA,PRKCE,PRKCI,PRKD1,PRKD3,RALB,RAP1B,RAP2A,RAP2B,RRAS2,SHC1,SOS2,VEGFA,VEGFB,VEGFC,VEGFD			VEGF Family Ligand-Receptor Interactions	5.01	0.286	3.545	AKT1,AKT2,AKT3,FLT1,FOS,HRAS,MAP2K1,MAP2K2,MAPK3,NRP1,PIK3C2A,PIK3R2,PLA2G12A,PLA2G4A,PRKCA,RAF1,RALB,RAP1A,RAP1B,RRAS,RRAS2,SHC1,VEGFB,VEGFD				VEGF Family Ligand-Receptor Interactions	3.98	0.345	-3.402	AKT1,AKT2,AKT3,FLT1,FOS,GRB2,KRAS,MAP2K1,MAPK1,NRAS,NRP1,PIK3C2A,PIK3CA,PRKCA,PRKCE,PRKCI,RALA,RALB,RAP1A,RAP1B,RAP2A,RAP2B,RRAS2,SHC1,SOS1,SOS2,VEGFB,VEGFC,VEGFD
157	RHO GTPases Activate WASPs and WAVEs	4.74	0.472	2.668	ABI1,ABI2,ABL1,ACTB,ACTG1,ACTR3,ARPC1B,ARPC2,ARPC5,CYFIP1,GRB2,MAPK1,MAPK3,NCK1,NCKAP1,PTK2,WASF2			RHO GTPases Activate WASPs and WAVEs	5.56	0.417	3.357	ABL1,ACTG1,ACTR2,ACTR3,ARPC1B,ARPC2,ARPC3,ARPC4,ARPC5,BAIAP2,BRK1,MAPK3,NCK1,NCKAP1,PTK2				RHO GTPases Activate WASPs and WAVEs	3.87	0.444	-2	ABI1,ABI2,ABL1,ACTG1,ACTR3,ARPC1B,ARPC2,ARPC4,ARPC5,GRB2,MAPK1,NCK1,PTK2,RAC1,WASF2,WIPF1
158	RAB geranylgeranylation	4.71	0.385	3.4	PTP4A2,RAB10,RAB11B,RAB12,RAB13,RAB14,RAB18,RAB1B,RAB21,RAB22A,RAB2B,RAB30,RAB31,RAB33B,RAB34,RAB35,RAB3D,RAB43,RAB5A,RAB5B,RAB5C,RAB6B,RAB7A,RAB8B,RAB9A			RAB geranylgeranylation	2.77	0.246	4	RAB11A,RAB12,RAB13,RAB18,RAB1A,RAB1B,RAB21,RAB24,RAB34,RAB3A,RAB4B,RAB5A,RAB6A,RAB7A,RAB9A,RABGGTB				RAB geranylgeranylation	5.43	0.415	-3.657	CHM,PTP4A2,RAB10,RAB11A,RAB11B,RAB13,RAB14,RAB18,RAB1B,RAB21,RAB22A,RAB23,RAB2A,RAB2B,RAB30,RAB31,RAB33B,RAB34,RAB3D,RAB43,RAB5A,RAB5B,RAB5C,RAB7A,RAB8A,RAB8B,RAB9A
159	Oncostatin M Signaling	4.71	0.442	2.982	GRB2,IL6ST,JAK1,JAK2,MAP2K1,MAPK1,MAPK3,MMP3,NRAS,OSMR,RALB,RAP1B,RAP2A,RAP2B,RRAS2,SHC1,STAT3,STAT5B,TIMP3			Oncostatin M Signaling	3.24	0.302	3.051	HRAS,IL6ST,MAP2K1,MAP2K2,MAPK3,OSMR,RAF1,RALB,RAP1A,RAP1B,RRAS,RRAS2,SHC1				Oncostatin M Signaling	5.71	0.488	-3.71	GRB2,IL6ST,JAK1,JAK2,KRAS,MAP2K1,MAPK1,MMP3,NRAS,OSMR,RALA,RALB,RAP1A,RAP1B,RAP2A,RAP2B,RRAS2,SHC1,SOS1,STAT3,STAT5B
160	Actin Nucleation by ARP-WASP Complex	4.67	0.344	2.858	ACTR3,ARPC1B,ARPC2,ARPC5,Cdc42,FNBP1,GNA12,GRB2,ITGA1,ITGA5,ITGA9,ITGAV,ITGB1,ITGB5,ITGB8,NCK1,NRAS,PPP1R12C,RALB,RAP1B,RAP2A,RAP2B,RHOA,RHOB,RHOC,RHOJ,RHOQ,RHOT1,ROCK1,ROCK2,RRAS2,SOS2			Actin Nucleation by ARP-WASP Complex	7.38	0.323	3.8	ACTR2,ACTR3,ARPC1B,ARPC2,ARPC3,ARPC4,ARPC5,ARPC5L,BAIAP2,HRAS,ITGA8,ITGAV,ITGB1,ITGB5,NCK1,PPP1R12C,RALB,RAP1A,RAP1B,RHOA,RHOBTB1,RHOC,RHOJ,RHOQ,RND3,ROCK1,ROCK2,RRAS,RRAS2,VASP				Actin Nucleation by ARP-WASP Complex	7.69	0.419	-3.772	ACTR3,ARPC1B,ARPC2,ARPC4,ARPC5,FNBP1,GNA12,GRB2,ITGA1,ITGA9,ITGAV,ITGB1,ITGB5,ITGB8,KRAS,NCK1,NRAS,PPP1R12A,PPP1R12C,RAC1,RALA,RALB,RAP1A,RAP1B,RAP2A,RAP2B,RHOB,RHOJ,RHOQ,RHOT1,RHOU,RND3,ROCK1,ROCK2,RRAS2,SOS1,SOS2,VASP,WIPF1
161	IL-15 Production	4.6	0.317	4.867	ABL1,ABL2,AXL,CLK1,CLK4,DDR2,DSTYK,DYRK1A,EGFR,EPHA3,ERBB4,FER,FGFR1,FGFR2,FLT1,FYN,IGF1R,IL6,INSR,IRF3,JAK1,JAK2,MAP2K1,MAP2K4,MAP2K5,NFKB1,NFKB2,NTRK2,NTRK3,PDGFRA,PDGFRB,PEAK1,PRKCI,PTK2,RELB,ROR1,RYK,TWF1,YES1			IL-15 Production	0.401	0.122	2.84	ABL1,AXL,CLK3,CSK,FGFR1,FGFR2,FLT1,MAP2K1,MAP2K3,PDGFRA,PEAK1,PTK2,ROR1,RYK,TWF1				IL-15 Production	2.28	0.268	-3.053	ABL1,CLK1,CLK4,DDR2,DSTYK,DYRK1A,EGFR,FER,FGFR1,FGFR2,FLT1,FLT3LG,IGF1R,INSR,JAK1,JAK2,MAP2K1,MAP2K3,MAP2K4,MAP2K5,NFKB1,NFKB2,NTRK2,PDGFRB,PEAK1,PRKCI,PTK2,REL,RELA,RELB,RYK,TWF1,YES1
162	Synaptic Long Term Potentiation	4.57	0.311	3.042	CACNA1C,Calm1 (includes others),CAMK2D,CHP1,CREB1,CREB3,CREB3L2,CREB5,CREBBP,EP300,GNAQ,GRIA4,ITPR2,MAP2K1,MAPK1,MAPK3,NRAS,PDIA3,PLCB1,PLCB4,PLCE1,PLCL1,PPP1CA,PPP1CB,Ppp1cc,PPP1R7,PPP3CA,PPP3CB,PRKACB,PRKAG1,PRKAG2,PRKCA,PRKCE,PRKCI,PRKD1,PRKD3,RALB,RAP1B,RAP2A,RAP2B,RRAS2			Synaptic Long Term Potentiation	6.14	0.265	2.475	ATF2,CACNA1C,Calm1 (includes others),CAMK2D,CHP1,CREB3L1,CREB3L2,CREB5,EP300,GRIA4,GRINA,HRAS,ITPR1,MAP2K1,MAP2K2,MAPK3,PDIA3,PLCB4,PLCL1,PPP1CA,PPP1CB,Ppp1cc,PPP1R10,PPP1R14A,PPP1R14B,PPP3CB,PPP3R1,PRKAR1A,PRKCA,RAF1,RALB,RAP1A,RAP1B,RRAS,RRAS2				Synaptic Long Term Potentiation	6.94	0.364	-4.128	ATF2,ATF4,Calm1 (includes others),CAMK2D,CREB1,CREB3,CREB3L1,CREB3L2,CREB5,CREBBP,EP300,GNA11,GNAQ,GRIA3,GRIA4,ITPR1,ITPR2,KRAS,MAP2K1,MAPK1,NRAS,PDIA3,PLCB1,PLCE1,PLCL1,PPP1CA,PPP1CB,Ppp1cc,PPP1R10,PPP1R11,PPP1R12A,PPP1R7,PPP3CA,PPP3CB,PRKACA,PRKACB,PRKAG1,PRKAG2,PRKCA,PRKCE,PRKCI,RALA,RALB,RAP1A,RAP1B,RAP2A,RAP2B,RRAS2
163	FGF Signaling	4.55	0.349	4.271	AKT3,CREB1,CREB3,CREB3L2,CREB5,CREBBP,CRK,CRKL,FGF2,FGF7,FGFR1,FGFR2,FRS2,GAB1,GRB2,MAP2K1,MAP3K5,MAPK1,MAPK14,MAPK3,MAPK8,MAPKAPK2,PIK3C2A,PIK3CA,PIK3R1,PIK3R2,PRKCA,PTPN11,SOS2,STAT3			FGF Signaling	3.85	0.256	3.13	AKT1,AKT2,AKT3,ATF2,CREB3L1,CREB3L2,CREB5,CRK,FGFR1,FGFR2,FGFRL1,HRAS,ITPR1,MAP2K1,MAP2K3,MAPK3,MAPKAPK2,PIK3C2A,PIK3R2,PRKCA,PTPN11,RAF1				FGF Signaling	7.68	0.43	-3.888	AKT1,AKT2,AKT3,ATF2,ATF4,CREB1,CREB3,CREB3L1,CREB3L2,CREB5,CREBBP,CRK,CRKL,FGF2,FGF7,FGFR1,FGFR2,FGFRL1,FRS2,GAB1,GRB2,ITPR1,MAP2K1,MAP2K3,MAP3K5,MAPK1,MAPK14,MAPK8,MAPKAPK2,PIK3C2A,PIK3CA,PRKCA,PTPN11,RAC1,SOS1,SOS2,STAT3
164	Hedgehog 'on' state	4.55	0.349	2.556	BOC,CDC73,CDON,CSNK1A1,CUL3,GLI3,ITCH,PSMA6,PSMB4,PSMB7,PSMC1,PSMC3,PSMD1,PSMD11,PSMD12,PSMD13,PSMD2,PSMD3,PSMD4,PSMD7,PSMD8,PSME2,PSME4,SEM1,SMO,SMURF1,SMURF2,SPOP,SPOPL,UBC			Hedgehog 'on' state	13.3	0.43	5.425	CSNK1A1,CUL3,EVC,GAS1,HHIP,PSMA1,PSMA2,PSMA3,PSMA5,PSMA6,PSMA7,PSMB1,PSMB2,PSMB3,PSMB4,PSMB5,PSMB6,PSMB7,PSMC1,PSMC2,PSMC4,PSMC5,PSMC6,PSMD12,PSMD13,PSMD3,PSMD4,PSMD6,PSMD7,PSMD8,PSMD9,PSME2,PSME4,PTCH1,RPS27A,SPOP,UBC				Hedgehog 'on' state	6.58	0.407	-3.212	ARRB1,BOC,CDC73,CDON,CSNK1A1,CUL3,EVC,GAS1,GLI3,ITCH,NUMB,PSMA1,PSMA7,PSMB10,PSMB4,PSMB7,PSMB8,PSMC3,PSMC6,PSMD1,PSMD11,PSMD12,PSMD2,PSMD3,PSMD4,PSMD6,PSMD9,PSME1,PSME4,SEM1,SMO,SMURF1,SMURF2,SPOPL,UBC
165	Signaling by PTK6	4.53	0.4	2.132	ARHGAP35,CDKN1B,CRK,DOCK1,EGFR,ELMO1,ELMO2,ERBB4,GPNMB,HIF1A,KHDRBS1,LRRK2,NR3C1,NRAS,PTPN1,PXN,RASA1,RHOA,SFPQ,SOCS3,STAT3,UBC			Signaling by PTK6	3.12	0.273	2.84	AKT1,ARAP1,CDK4,CRK,GPNMB,HBEGF,HIF1A,HRAS,KHDRBS1,NR3C1,PXN,RASA1,RHOA,RPS27A,UBC				Signaling by PTK6	6.57	0.473	-2.746	AKT1,ARAP1,ARHGAP35,CBL,CDK4,CDKN1B,CRK,DOCK1,EGFR,ELMO1,ELMO2,GPNMB,HBEGF,HIF1A,KHDRBS1,KRAS,LRRK2,NR3C1,NRAS,PTPN1,PXN,RAC1,RASA1,SFPQ,STAT3,UBC
166	C-type lectin receptors (CLRs)	4.22	0.297	3.395	AHCYL1,BTRC,CHUK,CREBBP,CUL1,EP300,FBXW11,FYN,ITPR2,MAP3K14,NEDD8,NFATC1,NFKB1,NFKB2,NFKBIA,NRAS,PAK2,PAK3,PDPK1,PPP3CA,PPP3CB,PRKACB,PSMA6,PSMB4,PSMB7,PSMC1,PSMC3,PSMD1,PSMD11,PSMD12,PSMD13,PSMD2,PSMD3,PSMD4,PSMD7,PSMD8,PSME2,PSME4,RELB,SEM1,TAB2,UBC,UBE2D1			C-type lectin receptors (CLRs)	10.1	0.31	6.252	AHCYL1,EP300,HRAS,ITPR1,NEDD8,NFATC3,PAK3,PPP3CB,PPP3R1,PSMA1,PSMA2,PSMA3,PSMA5,PSMA6,PSMA7,PSMB1,PSMB2,PSMB3,PSMB4,PSMB5,PSMB6,PSMB7,PSMC1,PSMC2,PSMC4,PSMC5,PSMC6,PSMD12,PSMD13,PSMD3,PSMD4,PSMD6,PSMD7,PSMD8,PSMD9,PSME2,PSME4,RAF1,RPS27A,UBA3,UBC,UBE2D2,UBE2M,UBE2N,UBE2V1				C-type lectin receptors (CLRs)	6.79	0.352	-4.243	AHCYL1,BCL10,BTRC,CHUK,CREBBP,CUL1,EP300,FBXW11,ITPR1,ITPR2,KRAS,MAP3K14,NFATC1,NFKB1,NFKB2,NRAS,PAK2,PAK3,PDPK1,PPP3CA,PPP3CB,PRKACA,PRKACB,PSMA1,PSMA7,PSMB10,PSMB4,PSMB7,PSMB8,PSMC3,PSMC6,PSMD1,PSMD11,PSMD12,PSMD2,PSMD3,PSMD4,PSMD6,PSMD9,PSME1,PSME4,PYCARD,RELA,RELB,SEM1,TAB2,UBC,UBE2D1,UBE2D2,UBE2N,UBE2V1
167	Hedgehog ligand biogenesis	4.21	0.369	2.041	ADAM17,ERLEC1,OS9,P4HB,PSMA6,PSMB4,PSMB7,PSMC1,PSMC3,PSMD1,PSMD11,PSMD12,PSMD13,PSMD2,PSMD3,PSMD4,PSMD7,PSMD8,PSME2,PSME4,SEL1L,SEM1,UBC,VCP			Hedgehog ligand biogenesis	13.6	0.492	5.303	DERL2,ERLEC1,PSMA1,PSMA2,PSMA3,PSMA5,PSMA6,PSMA7,PSMB1,PSMB2,PSMB3,PSMB4,PSMB5,PSMB6,PSMB7,PSMC1,PSMC2,PSMC4,PSMC5,PSMC6,PSMD12,PSMD13,PSMD3,PSMD4,PSMD6,PSMD7,PSMD8,PSMD9,PSME2,PSME4,RPS27A,UBC				Hedgehog ligand biogenesis	4.9	0.4	-3.138	ADAM17,ERLEC1,OS9,P4HB,PSMA1,PSMA7,PSMB10,PSMB4,PSMB7,PSMB8,PSMC3,PSMC6,PSMD1,PSMD11,PSMD12,PSMD2,PSMD3,PSMD4,PSMD6,PSMD9,PSME1,PSME4,SEL1L,SEM1,UBC,VCP
168	MAP kinase activation	4.19	0.436	3.153	BTRC,CHUK,CUL1,FBXW11,IRAK1,MAP2K1,MAP2K4,MAP3K8,MAPK14,MAPK8,MAPK9,MAPKAPK2,NFKB1,NOD1,RIPK2,TAB2,UBC			MAP kinase activation	1.2	0.205	2.121	IRAK1,MAP2K1,MAP2K3,MAPKAPK2,RPS27A,UBC,UBE2N,UBE2V1				MAP kinase activation	4.56	0.462	-2.357	BTRC,CHUK,CUL1,FBXW11,IRAK1,MAP2K1,MAP2K3,MAP2K4,MAPK14,MAPK8,MAPKAPK2,NFKB1,NOD1,RIPK2,TAB2,UBC,UBE2N,UBE2V1
169	GŒ±12/13 Signaling	4.12	0.301	2.466	AKT3,ARHGEF1,CDH11,CDH13,CHUK,GNA12,JUN,LPAR1,MAP2K1,MAP2K4,MAP3K5,MAPK1,MAPK3,MAPK8,MAPK9,MEF2A,MEF2D,MYL6,MYL9,NFKB1,NFKB2,NFKBIA,NFKBIB,NRAS,PIK3C2A,PIK3CA,PIK3R1,PIK3R2,PTK2,PXN,RALB,RAP1B,RAP2A,RAP2B,RASA1,RELB,RHOA,ROCK1,ROCK2,RRAS2			GŒ±12/13 Signaling	4.72	0.241	3.182	AKT1,AKT2,AKT3,CTNNB1,F2R,GNA13,HRAS,JUN,LPAR1,MAP2K1,MAP2K2,MAPK3,MEF2A,MEF2C,MYL12A,MYL12B,MYL6,MYL9,PIK3C2A,PIK3R2,PTK2,PXN,RAF1,RALB,RAP1A,RAP1B,RASA1,RHOA,ROCK1,ROCK2,RRAS,RRAS2				GŒ±12/13 Signaling	4.4	0.316	-2.53	AKT1,AKT2,AKT3,ARHGEF1,CDH11,CHUK,CTNNB1,F2R,GNA12,GNA13,KRAS,LPAR1,MAP2K1,MAP2K4,MAP3K5,MAPK1,MAPK8,MEF2A,MEF2C,MEF2D,MYL9,NFKB1,NFKB2,NRAS,PIK3C2A,PIK3CA,PTK2,PXN,RALA,RALB,RAP1A,RAP1B,RAP2A,RAP2B,RASA1,REL,RELA,RELB,ROCK1,ROCK2,RRAS2,VAV3
170	PI Metabolism	4.1	0.341	4.158	GDE1,MTMR2,MTMR3,MTMR6,OCRL,PI4K2A,PI4K2B,PI4KA,PIK3C2A,PIK3CA,PIK3R1,PIK3R2,PIKFYVE,PIP4K2A,PIP4K2C,PIP4P1,PIP5K1A,PITPNB,PLEKHA1,PLEKHA2,PLEKHA4,PLEKHA5,RAB14,RAB5A,SACM1L,SBF2,SYNJ1,SYNJ2			PI Metabolism	0.364	0.122	2.53	ARF3,GDE1,MTMR6,PIK3C2A,PIK3R2,PIP4P1,PLEKHA3,PTEN,RAB5A,SBF2				PI Metabolism	2.63	0.305	-2.6	ARF1,ARF3,MTMR1,MTMR2,MTMR3,OCRL,PI4K2A,PI4K2B,PI4KA,PIK3C2A,PIK3CA,PIKFYVE,PIP4K2A,PIP4K2C,PIP4P1,PIP5K1A,PITPNB,PLEKHA4,PLEKHA5,RAB14,RAB5A,RUFY1,SACM1L,SBF2,SYNJ2
171	NF-Œ∫B Activation by Viruses	4.09	0.346	2.746	AKT3,CHUK,ITGAV,ITGB1,MAP3K14,MAPK1,MAPK3,NFKB1,NFKB2,NFKBIA,NFKBIB,NRAS,PIK3C2A,PIK3CA,PIK3R1,PIK3R2,PRKCA,PRKCE,PRKCI,PRKD1,PRKD3,RALB,RAP1B,RAP2A,RAP2B,RELB,RRAS2			NF-Œ∫B Activation by Viruses	1.95	0.205	3	AKT1,AKT2,AKT3,HRAS,ITGAV,ITGB1,MAPK3,PIK3C2A,PIK3R2,PRKCA,RAF1,RALB,RAP1A,RAP1B,RRAS,RRAS2				NF-Œ∫B Activation by Viruses	3.77	0.346	-3	AKT1,AKT2,AKT3,CHUK,ITGAV,ITGB1,KRAS,MAP3K14,MAPK1,NFKB1,NFKB2,NRAS,PIK3C2A,PIK3CA,PRKCA,PRKCE,PRKCI,RALA,RALB,RAP1A,RAP1B,RAP2A,RAP2B,REL,RELA,RELB,RRAS2
172	WNT/Ca+ pathway	4.09	0.364	2.558	AXIN1,CREB1,CREB3,CREB3L2,CREB5,CREBBP,FZD1,FZD2,FZD4,GSK3B,NFAT5,NFATC1,NFKB1,NFKB2,PDIA3,PLCB1,PLCB4,PLCE1,PLCL1,PPP3CA,PRKCA,RELB,ROR1,SMO			WNT/Ca+ pathway	2.69	0.242	2.673	ATF2,CREB3L1,CREB3L2,CREB5,FZD2,FZD4,GSK3B,NFAT5,NFATC3,PDE6D,PDIA3,PLCB4,PLCL1,PRKCA,ROR1,WNT5A				WNT/Ca+ pathway	5.28	0.409	-3.545	ATF2,ATF4,CREB1,CREB3,CREB3L1,CREB3L2,CREB5,CREBBP,FZD2,FZD4,FZD7,GSK3B,NFAT5,NFATC1,NFKB1,NFKB2,PDIA3,PLCB1,PLCE1,PLCL1,PPP3CA,PRKCA,REL,RELA,RELB,SMO,WNT5A
173	Natural Killer Cell Signaling	4.02	0.273	4.258	AKT3,CFL2,COL1A1,COL3A1,FYN,GRB2,HLA-A,HLA-E,HLA-G,HSPA1A/HSPA1B,Hspa1b,HSPA4,HSPA5,HSPA8,HSPA9,ITGB1,JAK2,MAP2K1,MAP3K14,MAP3K2,MAP3K3,MAP3K4,MAP3K5,MAP3K6,Map3k7,MAP3K8,MAPK1,MAPK14,MAPK3,MICB,MYD88,NCK1,NFAT5,NFATC1,NFKB1,NFKB2,NRAS,PAK2,PAK3,PIK3C2A,PIK3CA,PIK3R1,PIK3R2,PTPN11,PXN,RALB,RAP1B,RAP2A,RAP2B,RELB,ROCK1,RRAS2,SOS2,Wasl			Natural Killer Cell Signaling	3.86	0.202	2.53	AKT1,AKT2,AKT3,B2M,CFL1,CFL2,COL1A1,COL1A2,COL3A1,HLA-A,HLA-E,HRAS,HSPA4,HSPA5,HSPA8,HSPA9,ITGB1,MAP2K1,MAP2K2,MAP2K3,MAP3K2,Map3k7,MAPK3,MICB,NCK1,NFAT5,NFATC3,PAK3,PIK3C2A,PIK3R2,PTPN11,PXN,RAF1,RALB,RAP1A,RAP1B,ROCK1,RRAS,RRAS2,Wasl				Natural Killer Cell Signaling	5.03	0.298	-3.046	AKT1,AKT2,AKT3,CFL1,COL1A1,COL1A2,COL3A1,GRB2,HLA-A,HLA-G,HSPA14,HSPA2,HSPA4,HSPA5,HSPA9,ITGB1,JAK2,KRAS,MAP2K1,MAP2K3,MAP3K14,MAP3K2,MAP3K3,MAP3K4,MAP3K5,MAP3K6,Map3k7,MAPK1,MAPK14,MICB,NCK1,NFAT5,NFATC1,NFKB1,NFKB2,NRAS,PAK2,PAK3,PIK3C2A,PIK3CA,PTPN11,PXN,RAC1,RALA,RALB,RAP1A,RAP1B,RAP2A,RAP2B,REL,RELA,RELB,ROCK1,RRAS2,SOS1,SOS2,VAV3,Wasl,WIPF1
174	Sphingolipid metabolism	4.01	0.333	2.785	ACER3,ARSA,ARSB,CERK,CERS4,CERS5,CTSA,ESYT1,ESYT2,GLB1,GM2A,HEXB,KDSR,ORMDL3,OSBP,PRKD1,PRKD3,PSAP,SGMS1,SGPL1,SGPP1,SPHK1,SPTLC1,SPTLC2,SPTSSA,SUMF1,UGCG,VAPA,VAPB			Sphingolipid metabolism	1.83	0.195	3.638	ACER3,ARSK,CERS2,CERS5,CTSA,DEGS1,ESYT2,GM2A,HEXA,KDSR,ORMDL3,PSAP,SMPD3,SPTLC2,SPTSSA,VAPA,VAPB				Sphingolipid metabolism	2.26	0.287	-2.6	ALDH3A2,ARSA,ARSK,CERK,CERS4,CERS5,CSNK1G2,CTSA,ESYT1,GM2A,HEXB,ORMDL2,OSBP,SGMS1,SGMS2,SGPL1,SGPP1,SMPD1,SPHK1,SPTLC1,SPTLC2,SUMF1,UGCG,VAPA,VAPB
175	3-phosphoinositide Degradation	3.98	0.273	4.323	ACP1,ATP1A1,CILP,DOT1L,DUSP16,EYA4,IGBP1,MTMR2,MTMR3,MTMR6,NT5C,OCRL,PAWR,PIKFYVE,PIP4P1,PIP4P2,PPFIA1,PPFIBP2,PPP1CA,PPP1CB,Ppp1cc,PPP1R12C,PPP1R7,PPP2CA,PPP2CB,PPP2R2A,PPP2R3A,PPP2R5A,PPP2R5E,PPP3CA,PPP3CB,PPTC7,PTPN1,PTPN11,PTPN12,PTPN2,PTPRJ,PTPRM,RASA1,RNGTT,SACM1L,SET,SGPP1,SIRPA,SOCS3,SSH1,SSH2,STYX,SYNJ1,SYNJ2,TNS3,UBLCP1,WBP11			3-phosphoinositide Degradation	1.4	0.155	4.6	ATP1A1,CILP,ILKAP,MDP1,MTMR6,NT5C,NUDT3,NUDT9,PIP4P1,PIP4P2,PPP1CA,PPP1CB,Ppp1cc,PPP1R10,PPP1R12C,PPP1R14A,PPP1R14B,PPP2CA,PPP3CB,PPP3R1,PPP4C,PPP5C,PTEN,PTPMT1,PTPN11,PTPN12,RASA1,SET,SIRPA,TNS3				3-phosphoinositide Degradation	5	0.299	-5.013	ACP1,ATP1A2,CILP,DOT1L,DUSP11,DUSP16,DUSP5,DUSP8,EYA4,IGBP1,MTMR1,MTMR2,MTMR3,OCRL,PAWR,PIKFYVE,PIP4P1,PIP4P2,PPFIA1,PPFIBP2,PPP1CA,PPP1CB,Ppp1cc,PPP1R10,PPP1R11,PPP1R12A,PPP1R12C,PPP1R7,PPP2CA,PPP2CB,PPP2R1A,PPP2R2A,PPP2R3A,Ppp2r3d,PPP2R5A,PPP2R5E,PPP3CA,PPP3CB,PPTC7,PTPA,PTPN1,PTPN11,PTPN12,PTPN2,PTPRM,RASA1,RNGTT,SACM1L,SET,SGPP1,SIRPA,SSH1,SSH2,STYX,SYNJ2,TNS3,UBLCP1,WBP11
176	p75 NTR receptor-mediated signalling	3.97	0.32	3.536	ADAM17,AKAP13,APH1A,ARHGDIA,ARHGEF1,ARHGEF10,ARHGEF11,ARHGEF12,ARHGEF6,BCL2L11,FGD4,HDAC1,HDAC3,IRAK1,ITSN1,KALRN,MAPK8,MYD88,NCSTN,NFKB1,NFKBIA,NGF,PRKCI,PSEN2,RHOA,RIPK2,SOS2,SQSTM1,TIAM1,TIAM2,UBC,YWHAE			p75 NTR receptor-mediated signalling	0.843	0.15	3.357	APH1A,ARHGDIA,ARHGEF12,BAD,BEX3,GNA13,HDAC2,IRAK1,NCSTN,PSENEN,RHOA,RPS27A,RTN4,UBC,YWHAE				p75 NTR receptor-mediated signalling	8.25	0.42	-3.395	AATF,ADAM17,APH1A,ARHGDIA,ARHGEF1,ARHGEF10,ARHGEF11,ARHGEF12,ARHGEF2,ARHGEF40,ARHGEF6,BCL2L11,BEX3,FGD4,GNA13,HDAC1,HDAC3,IRAK1,ITSN1,KALRN,MAGED1,MAPK8,NFKB1,NGF,PLEKHG2,PRKCI,PSEN1,PSEN2,PSENEN,RAC1,RELA,RIPK2,RTN4,SOS1,SOS2,SQSTM1,TIAM1,TIAM2,TRIO,UBC,VAV3,YWHAE
177	Molecular Mechanisms of Cancer	3.96	0.214	7.857	ABL1,ACVR2A,ADCY5,ADGRD1,AKT3,APC,APH1A,ARHGEF1,ARHGEF10,ARHGEF11,ARHGEF12,ARHGEF6,AXIN1,BCL2,BCL2L1,BCL2L11,BIRC2,BIRC3,BMP4,BMPR1A,BMPR2,BRAF,CAMK2D,CCND2,CCND3,Cdc42,CDKN1A,CDKN2C,CFLAR,CREBBP,CRK,CTNNA1,CTNND1,CYCS,EDNRA,EP300,FGF2,FNBP1,FOS,FOXO1,FYN,FZD1,FZD2,FZD4,GAB1,GAB2,GABBR1,GHR,GNA12,GNAI2,GNAI3,GNAO1,GNAQ,GNB4,GNG10,GNG11,GNG12,GNG5,GPR107,GPR108,GPR39,GPRC5B,GRB2,GSK3B,GUCY1A1,GUCY…			Molecular Mechanisms of Cancer	1.3	0.13	4.081	ABL1,ACKR3,ACVR1,ADCY7,ADGRD1,ADGRL1,AKT1,AKT2,AKT3,APC,APH1A,ARHGEF12,BAD,BAX,BCL2L1,BIRC2,BMP1,BMPR1A,BMPR2,CAMK2D,CCND2,CCND3,CDK4,CDKN1A,CDKN2D,CFLAR,CRK,CTNNB1,CTNND1,CYCS,DIABLO,EP300,F2R,FOS,FZD2,FZD4,GAB2,GHR,GNA13,GNAS,GNB1,GNB2,GNB4,GNG10,GNG5,GPR39,GSK3B,GUCY1A1,HDAC2,HES1,HIF1A,HRAS,IL11RA,IL13RA1,IL1R1,IL6ST,ITGA8,ITGAV,ITGB1,ITGB5,JUN,LAMTOR3,LPAR1,LRP1,MAP2K1,MAP2K2,MAP2K3,MAPK3,MA…				Molecular Mechanisms of Cancer	3.15	0.215	-6.579	ABL1,ACVR1,ACVR2A,ACVRL1,ADCY7,ADGRA2,ADGRD1,AKT1,AKT2,AKT3,APAF1,APC,APH1A,ARHGEF1,ARHGEF10,ARHGEF11,ARHGEF12,ARHGEF2,ARHGEF6,BCL2,BCL2L11,BMP4,BMPR1A,BMPR2,BRAF,CAMK2D,CBL,CCND2,CDK4,CDKN1A,CDKN2C,CFLAR,CREBBP,CRK,CTNNA1,CTNNB1,CTNND1,DIABLO,EP300,F2R,FAS,FGF2,FNBP1,FOS,FZD2,FZD4,FZD7,GAB1,GAB2,GABBR1,GHR,GNA11,GNA12,GNA13,GNAI1,GNAI2,GNAI3,GNAO1,GNAQ,GNAS,GNB4,GNG11,GNG12,GNG5,GPR107,GPR153,GP…
178	Œ±-Adrenergic Signaling	3.94	0.312	2.4	ADCY5,Calm1 (includes others),GNA12,GNAI2,GNAI3,GNAO1,GNAQ,GNB4,GNG10,GNG11,GNG12,GNG5,GUCY1A1,GUCY1B1,ITPR2,MAP2K1,MAPK1,MAPK3,NRAS,PHKB,PRKACB,PRKAG1,PRKAG2,PRKCA,PRKCE,PRKCI,PRKD1,PRKD3,RALB,RAP1B,RAP2A,RAP2B,RRAS2,SLC8A1			Œ±-Adrenergic Signaling	3.09	0.22	2.324	ADCY7,Calm1 (includes others),GNA13,GNAS,GNB1,GNB2,GNB4,GNG10,GNG5,GUCY1A1,HRAS,ITPR1,MAP2K1,MAP2K2,MAPK3,PHKB,PRKAR1A,PRKCA,RAF1,RALB,RAP1A,RAP1B,RRAS,RRAS2				Œ±-Adrenergic Signaling	5.56	0.358	-4.2	ADCY7,Calm1 (includes others),GNA11,GNA12,GNA13,GNAI1,GNAI2,GNAI3,GNAO1,GNAQ,GNAS,GNB4,GNG11,GNG12,GNG5,GUCY1A1,ITPR1,ITPR2,KRAS,MAP2K1,MAPK1,NRAS,PHKB,PRKACA,PRKACB,PRKAG1,PRKAG2,PRKCA,PRKCE,PRKCI,PYGB,RALA,RALB,RAP1A,RAP1B,RAP2A,RAP2B,RRAS2,SLC8A1
179	TNFR2 non-canonical NF-kB pathway	3.85	0.353	2.041	BIRC2,BIRC3,LTBR,MAP3K14,PSMA6,PSMB4,PSMB7,PSMC1,PSMC3,PSMD1,PSMD11,PSMD12,PSMD13,PSMD2,PSMD3,PSMD4,PSMD7,PSMD8,PSME2,PSME4,SEM1,TNFSF13B,TRAF3,UBC			TNFR2 non-canonical NF-kB pathway	15.6	0.515	5.578	BIRC2,LTBR,PSMA1,PSMA2,PSMA3,PSMA5,PSMA6,PSMA7,PSMB1,PSMB2,PSMB3,PSMB4,PSMB5,PSMB6,PSMB7,PSMC1,PSMC2,PSMC4,PSMC5,PSMC6,PSMD12,PSMD13,PSMD3,PSMD4,PSMD6,PSMD7,PSMD8,PSMD9,PSME2,PSME4,RPS27A,TNFRSF12A,TNFSF12,TNFSF13B,UBC				TNFR2 non-canonical NF-kB pathway	4.01	0.368	-3	LTBR,MAP3K14,PSMA1,PSMA7,PSMB10,PSMB4,PSMB7,PSMB8,PSMC3,PSMC6,PSMD1,PSMD11,PSMD12,PSMD2,PSMD3,PSMD4,PSMD6,PSMD9,PSME1,PSME4,SEM1,TNFRSF12A,TNFSF13B,TRAF3,UBC
180	Calcium Signaling	3.83	0.264	3.307	ACTA2,ASPH,ATP2B1,ATP2B4,ATP2C1,CABIN1,CACNA1A,CACNA1C,Calm1 (includes others),CALR,CAMK1D,CAMK2D,CAMKK2,CHP1,CREB1,CREB3,CREB3L2,CREB5,CREBBP,EP300,GRIA4,GRIK1,HDAC1,HDAC3,HDAC5,HDAC7,HDAC8,HDAC9,ITPR2,MAPK1,MAPK3,MCU,MEF2A,MEF2D,MICU1,MYH11,MYH9,MYL6,MYL9,MYO10,MYO18A,NFAT5,NFATC1,PPP3CA,PPP3CB,PRKACB,PRKAG1,PRKAG2,RAP1B,RAP2A,RAP2B,RCAN2,SLC8A1,SLC8B1,TNNT2,Tpm1,Tpm2,TRPC1			Calcium Signaling	3.46	0.191	3.266	ACTA2,ASPH,ATF2,ATP2B1,ATP2C1,CACNA1A,CACNA1C,Calm1 (includes others),CALR,CAMK1D,CAMK2D,CAMKK2,CHP1,CREB3L1,CREB3L2,CREB5,EP300,GRIA4,GRINA,HDAC2,ITPR1,MAPK3,MCU,MEF2A,MEF2C,MYH11,MYH9,MYL6,MYL9,NFAT5,NFATC3,PPP3CB,PPP3R1,PRKAR1A,RAP1A,RAP1B,RCAN2,SLC8B1,Tpm1,Tpm2,TPM3,Tpm4				Calcium Signaling	4.72	0.286	-4.427	ACTA2,ASPH,ATF2,ATF4,ATP2A2,ATP2B1,ATP2B4,CABIN1,CACNA1A,CACNA2D1,Calm1 (includes others),CALR,CAMK1,CAMK1D,CAMK2D,CAMKK2,CREB1,CREB3,CREB3L1,CREB3L2,CREB5,CREBBP,EP300,GRIA3,GRIA4,GRIK1,HDAC1,HDAC3,HDAC4,HDAC5,HDAC7,HDAC8,ITPR1,ITPR2,MAPK1,MCU,MEF2A,MEF2C,MEF2D,MICU1,MYH10,MYH11,MYH9,MYL9,MYO10,MYO18A,NFAT5,NFATC1,PPP3CA,PPP3CB,PRKACA,PRKACB,PRKAG1,PRKAG2,RAP1A,RAP1B,RAP2A,RAP2B,SLC8A1,SLC8B1,TN…
181	D-myo-inositol (1,4,5,6)-Tetrakisphosphate Biosynthesis	3.8	0.273	3.904	ACP1,ATP1A1,CILP,DOT1L,DUSP16,EYA4,IGBP1,MTMR2,MTMR6,NT5C,OCRL,PAWR,PIKFYVE,PPFIA1,PPFIBP2,PPP1CA,PPP1CB,Ppp1cc,PPP1R12C,PPP1R7,PPP2CA,PPP2CB,PPP2R2A,PPP2R3A,PPP2R5A,PPP2R5E,PPP3CA,PPP3CB,PPTC7,PTPN1,PTPN11,PTPN12,PTPN2,PTPRJ,PTPRM,RASA1,RNGTT,SACM1L,SET,SGPP1,SIRPA,SOCS3,SSH1,SSH2,STYX,SYNJ1,SYNJ2,TNS3,UBLCP1,WBP11			D-myo-inositol (1,4,5,6)-Tetrakisphosphate Biosynthesis	1.1	0.148	4.264	ATP1A1,CILP,ILKAP,MDP1,MTMR6,NT5C,NUDT3,NUDT9,PPP1CA,PPP1CB,Ppp1cc,PPP1R10,PPP1R12C,PPP1R14A,PPP1R14B,PPP2CA,PPP3CB,PPP3R1,PPP4C,PPP5C,PTEN,PTPN11,PTPN12,RASA1,SET,SIRPA,TNS3				D-myo-inositol (1,4,5,6)-Tetrakisphosphate Biosynthesis	4.53	0.295	-4.529	ACP1,ATP1A2,CILP,DOT1L,DUSP11,DUSP16,DUSP5,DUSP8,EYA4,IGBP1,MTMR2,OCRL,PAWR,PIKFYVE,PPFIA1,PPFIBP2,PPP1CA,PPP1CB,Ppp1cc,PPP1R10,PPP1R11,PPP1R12A,PPP1R12C,PPP1R7,PPP2CA,PPP2CB,PPP2R1A,PPP2R2A,PPP2R3A,Ppp2r3d,PPP2R5A,PPP2R5E,PPP3CA,PPP3CB,PPTC7,PTPA,PTPN1,PTPN11,PTPN12,PTPN2,PTPRM,RASA1,RNGTT,SACM1L,SET,SGPP1,SIRPA,SSH1,SSH2,STYX,SYNJ2,TNS3,UBLCP1,WBP11
182	D-myo-inositol (3,4,5,6)-tetrakisphosphate Biosynthesis	3.8	0.273	3.904	ACP1,ATP1A1,CILP,DOT1L,DUSP16,EYA4,IGBP1,MTMR2,MTMR6,NT5C,OCRL,PAWR,PIKFYVE,PPFIA1,PPFIBP2,PPP1CA,PPP1CB,Ppp1cc,PPP1R12C,PPP1R7,PPP2CA,PPP2CB,PPP2R2A,PPP2R3A,PPP2R5A,PPP2R5E,PPP3CA,PPP3CB,PPTC7,PTPN1,PTPN11,PTPN12,PTPN2,PTPRJ,PTPRM,RASA1,RNGTT,SACM1L,SET,SGPP1,SIRPA,SOCS3,SSH1,SSH2,STYX,SYNJ1,SYNJ2,TNS3,UBLCP1,WBP11			D-myo-inositol (3,4,5,6)-tetrakisphosphate Biosynthesis	1.1	0.148	4.264	ATP1A1,CILP,ILKAP,MDP1,MTMR6,NT5C,NUDT3,NUDT9,PPP1CA,PPP1CB,Ppp1cc,PPP1R10,PPP1R12C,PPP1R14A,PPP1R14B,PPP2CA,PPP3CB,PPP3R1,PPP4C,PPP5C,PTEN,PTPN11,PTPN12,RASA1,SET,SIRPA,TNS3				D-myo-inositol (3,4,5,6)-tetrakisphosphate Biosynthesis	4.53	0.295	-4.529	ACP1,ATP1A2,CILP,DOT1L,DUSP11,DUSP16,DUSP5,DUSP8,EYA4,IGBP1,MTMR2,OCRL,PAWR,PIKFYVE,PPFIA1,PPFIBP2,PPP1CA,PPP1CB,Ppp1cc,PPP1R10,PPP1R11,PPP1R12A,PPP1R12C,PPP1R7,PPP2CA,PPP2CB,PPP2R1A,PPP2R2A,PPP2R3A,Ppp2r3d,PPP2R5A,PPP2R5E,PPP3CA,PPP3CB,PPTC7,PTPA,PTPN1,PTPN11,PTPN12,PTPN2,PTPRM,RASA1,RNGTT,SACM1L,SET,SGPP1,SIRPA,SSH1,SSH2,STYX,SYNJ2,TNS3,UBLCP1,WBP11
183	Signaling by FGFR1	3.64	0.38	2.982	BRAF,FGF2,FGFR1,FLRT2,FRS2,GAB1,GRB2,MAPK1,MAPK3,NRAS,PIK3CA,PIK3R1,PPP2CA,PPP2CB,PTPN11,SHC1,SPRED1,SPRED2,UBC			Signaling by FGFR1	1.33	0.2	2.53	FGFR1,FGFRL1,FLRT2,HRAS,MAPK3,PPP2CA,PTPN11,RPS27A,SHC1,UBC				Signaling by FGFR1	5.63	0.46	-3.545	BRAF,CBL,FGF2,FGFR1,FGFRL1,FLRT2,FRS2,GAB1,GRB2,KRAS,MAPK1,NRAS,PIK3CA,PPP2CA,PPP2CB,PPP2R1A,PTPN11,SHC1,SOS1,SPRED1,SPRED2,SPRY2,UBC
184	Cancer Drug Resistance by Drug Efflux	3.62	0.362	2.236	ABCC1,ABCG2,AKT3,BRAF,FOXO1,FOXO3,MAP2K1,MAPK1,MAPK3,NFKB1,NRAS,PIK3CA,PIK3R1,PIK3R2,PTGS2,RALB,RAP1B,RAP2A,RAP2B,RRAS2,TP53			Cancer Drug Resistance by Drug Efflux	3.35	0.276	2.324	AKT1,AKT2,AKT3,HRAS,MAP2K1,MAP2K2,MAPK3,PIK3R2,PTEN,RAF1,RALB,RAP1A,RAP1B,RRAS,RRAS2,TP53				Cancer Drug Resistance by Drug Efflux	2.92	0.345	-2.236	AKT1,AKT2,AKT3,ARAF,BRAF,KRAS,MAP2K1,MAPK1,NFKB1,NRAS,PIK3CA,RALA,RALB,RAP1A,RAP1B,RAP2A,RAP2B,RRAS2,TP53,YBX1
185	Nuclear Cytoskeleton Signaling Pathway	3.57	0.259	3.046	ACTA2,ACTB,ACTG1,ACTR10,AHCTF1,BTRC,CAPZA1,CAPZA2,CAPZB,CDH11,CDH13,CSNK2A1,CSNK2A2,CTDNEP1,CUL1,DCTN2,DCTN4,DYNC1H1,DYNC1LI2,DYNLL1,EGR1,EMD,FN1,FYN,GLE1,ITGA1,ITGA5,ITGA9,ITGAV,ITGB1,ITGB5,ITGB8,KIF13B,KIF16B,KIF1B,KIF1C,KIFAP3,KLC1,MRTFA,NFKB1,NFKB2,NUP153,NUP98,PLEC,RHOA,SEH1L,SUN2,SYNE1,SYNE2,TPR,TUBA1A,TUBA1B,TUBA1C,TUBB2A,TUBB4B,YAP1,YES1			Nuclear Cytoskeleton Signaling Pathway	1.51	0.155	3.087	ACTA2,ACTG1,ACTR10,ACTR1A,CAPZA1,CAPZA2,CSNK2A1,CSNK2B,CTNNB1,DCTN1,DCTN2,DCTN3,DCTN6,DYNC1H1,EGR1,EMD,FN1,ITGA8,ITGAV,ITGB1,ITGB5,KIF1B,KIF1C,KIF2A,KIF5B,LMNA,RAE1,RHOA,SEH1L,TUBA1B,TUBA1C,TUBB2A,TUBB2B,TUBB4B				Nuclear Cytoskeleton Signaling Pathway	2.42	0.245	-3.81	ACTA2,ACTG1,ACTR10,AHCTF1,BTRC,CAPZA1,CAPZB,CDH11,CSNK2A1,CSNK2A2,CTNNB1,CUL1,DCTN2,DCTN4,DCTN6,DYNC1LI2,DYNLL1,DYNLL2,EMD,GLE1,ITGA1,ITGA9,ITGAV,ITGB1,ITGB5,ITGB8,KIF13B,KIF16B,KIF1B,KIF1C,KIF2A,KIF5B,KIFAP3,KLC1,MRTFA,NFKB1,NFKB2,NUP153,NUP98,PLEC,POM121/POM121C,SEC13,SUN1,SUN2,SYNE1,SYNE2,TMX4,TPR,TUBA1C,TUBB2A,TUBB4B,TUBB6,YAP1,YES1
186	Signaling by SCF-KIT	3.56	0.395	2.668	FER,FYN,GAB2,GRB10,GRB2,JAK2,KITLG,NRAS,PIK3CA,PIK3R1,PIK3R2,PRKCA,PTPN11,SOCS1,STAT3,STAT5B,YES1			Signaling by SCF-KIT	0.275	0.116	2.236	GAB2,HRAS,PIK3R2,PRKCA,PTPN11				Signaling by SCF-KIT	2.84	0.372	-2	CBL,FER,GAB2,GRB10,GRB2,JAK2,KRAS,NRAS,PIK3CA,PRKCA,PTPN11,RAC1,SOS1,STAT3,STAT5B,YES1
187	Autism Signaling Pathway	3.56	0.244	2.492	AKT1S1,AKT3,ALDH1A1,ALDH3A1,ALDH6A1,APC,AXIN1,BCKDHB,BRAF,CACNA1A,CACNA1C,CAMK2D,CAMKK2,CHD8,CREBBP,CYFIP1,DLD,Eda,EIF4EBP1,EP300,FMR1,FZD1,FZD2,FZD4,GSK3B,HLA-A,HLA-E,HLA-G,IGF1,IGF1R,IL17D,IL33,IL6,LRP5,LRP6,MAP2K1,MAPK1,MAPK3,MECP2,MR1,MTHFR,NF1,NLGN2,NRAS,NTRK2,PCCA,PIK3C2A,PIK3CA,PIK3R1,PIK3R2,PRKACB,PRKAG1,PRKAG2,RAI1,RALB,RAP1B,RAP2A,RAP2B,RARA,RARG,RPS6,RPS6KB1,RRAS2,RXRA,SLC6A8,SMO,SOS2,…			Autism Signaling Pathway	2.38	0.162	3.464	AKT1,AKT2,AKT3,ALDH1A1,APC,B2M,CACNA1A,CACNA1C,CAMK2D,CAMKK2,CTNNB1,DLD,EIF4E,EIF4EBP1,EP300,FMR1,FZD2,FZD4,GRINA,GSK3B,HLA-A,HLA-E,HRAS,IL33,MAP2K1,MAP2K2,MAPK3,MR1,PIK3C2A,PIK3R2,PRKAR1A,PTCH1,PTEN,RAF1,RALB,RAP1A,RAP1B,RARG,RHEB,RPS6,RPS6KB1,RRAS,RRAS2,TCF4,TGFB1,TGFB2,TGFB3,TNFSF12,TNFSF13B,WNT5A				Autism Signaling Pathway	3.66	0.253	-3.72	AKT1,AKT1S1,AKT2,AKT3,ALDH1A1,ALDH3A2,ALDH6A1,ALDH7A1,APC,BRAF,CACNA1A,CACNA2D1,CAMK2D,CAMKK2,CHD8,CREBBP,CTNNB1,CYP27A1,DLD,Eda,EIF4E,EIF4EBP1,EP300,FMR1,FZD2,FZD4,FZD7,GSK3B,HLA-A,HLA-G,IGF1R,IGF2R,IL33,KRAS,LRP6,MAP2K1,MAPK1,MECP2,MR1,MTHFR,NF1,NLGN2,NRAS,NTRK2,PCCA,PIK3C2A,PIK3CA,PRKACA,PRKACB,PRKAG1,PRKAG2,RAI1,RALA,RALB,RAP1A,RAP1B,RAP2A,RAP2B,RARA,RARG,RPS6,RPS6KB1,RRAS2,RXRA,SLC6A8,SMO,SO…
188	Interleukin-3, Interleukin-5 and GM-CSF signaling	3.51	0.364	3.578	CRK,CRKL,FYN,GAB2,GRB2,IL3RA,JAK1,JAK2,OCRL,PIK3CA,PIK3R1,PIK3R2,PTPN11,RAPGEF1,SHC1,STAT5B,SYNJ1,SYNJ2,UBC,YES1			Interleukin-3, Interleukin-5 and GM-CSF signaling	0.574	0.145	2.121	CRK,GAB2,PIK3R2,PTPN11,RPS27A,SHC1,UBC,YWHAZ				Interleukin-3, Interleukin-5 and GM-CSF signaling	2.4	0.327	-3.771	CBL,CRK,CRKL,GAB2,GRB2,IL3RA,JAK1,JAK2,OCRL,PIK3CA,PRKACA,PTPN11,SHC1,SOS1,STAT5B,SYNJ2,UBC,YES1
189	Salvage Pathways of Pyrimidine Ribonucleotides	3.48	0.309	3.528	ACVR2A,BRAF,CDK7,CDK8,CMPK1,CSNK1A1,CSNK1D,DAPK1,DMPK,DYRK1A,GRK5,HIPK1,IRAK1,MAP2K1,MAP2K4,MAP3K6,MAP3K8,MAPK1,MAPK3,MAPK6,MAPK8,MAPK9,NME2,PAK2,PAK3,PIM1,PKN1,PRKCE,PRPF4B,UPP2			Salvage Pathways of Pyrimidine Ribonucleotides	1.15	0.165	3	AK1,AKT2,CDK4,CDK8,CMPK1,CSNK1A1,DAPK1,HIPK1,IRAK1,MAP2K1,MAP2K2,MAP2K3,MAPK3,NME1,NME2,PAK3				Salvage Pathways of Pyrimidine Ribonucleotides	2.19	0.278	-2.502	ACVR2A,AK1,AKT2,ARAF,BRAF,CDK4,CDK8,CMPK1,CSNK1A1,CSNK1D,DYRK1A,GRK5,IRAK1,MAP2K1,MAP2K3,MAP2K4,MAP3K6,MAPK1,MAPK6,MAPK8,NME2,PAK2,PAK3,PKN1,PRKCE,PRKX,UPP2
190	Nucleotide Excision Repair	3.48	0.309	2.191	AQR,CCNH,CDK7,Cops2,COPS3,COPS5,COPS6,CUL4A,DDB1,EP300,GTF2H1,HMGN1,MNAT1,PCNA,PIAS1,POLD4,POLR2A,POLR2D,RAD23B,RFC1,RNF111,SUMO1,SUMO2,SUMO3,TCEA1,UBC,UBE2V2,USP45,USP7,XPA			Nucleotide Excision Repair	6.92	0.309	3.286	CCNH,CETN2,Cops2,CUL4B,EP300,ERCC1,GPS1,GTF2H5,HMGN1,PCNA,POLD4,POLR2A,POLR2C,POLR2F,POLR2G,POLR2H,POLR2J,POLR2K,RAD23A,RAD23B,RPS27A,SUMO1,SUMO2,SUMO3,UBC,UBE2I,UBE2N,UBE2V2,USP7,XPA				Nucleotide Excision Repair	6.09	0.381	-4.11	AQR,CCNH,CETN2,Cops2,COPS3,COPS4,COPS5,COPS6,COPS7A,COPS8,CUL4A,CUL4B,DDB1,EP300,GPS1,GTF2H1,HMGN1,MNAT1,PCNA,POLD4,POLE3,POLE4,POLR2A,POLR2E,PPIE,RAD23A,RAD23B,RFC1,RNF111,RPA3,SUMO3,UBC,UBE2I,UBE2N,UBE2V2,USP45,USP7
191	DHCR24 Signaling Pathway	3.48	0.285	2.082	AHSG,AKT3,APOD,APP,BACE1,C3,C4A/C4B,ESR1,GSK3B,HMOX1,IGF1,NFKB1,NFKB2,NRAS,PCYOX1,PDGFD,PIK3C2A,PIK3CA,PIK3R1,PIK3R2,PLTP,PON3,PRKCA,PRKCE,PRKCI,PRKD1,PRKD3,RALB,RAP1B,RAP2A,RAP2B,RBP4,REST,RRAS2,RXRA,SOX9,THRB,TP53,VCAM1			DHCR24 Signaling Pathway	2.05	0.182	3	AKT1,AKT2,AKT3,APOE,APP,AR,C4A/C4B,ESR1,GSK3B,HRAS,NR1H2,PCYOX1,PDGFA,PDGFD,PIK3C2A,PIK3R2,PRKCA,RALB,RAP1A,RAP1B,RBP4,RRAS,RRAS2,THRB,TP53				DHCR24 Signaling Pathway	4.07	0.307	-2.777	AKT1,AKT2,AKT3,APOE,APP,AR,BACE1,C3,C4A/C4B,ESR1,GSK3B,HMOX1,KRAS,NFKB1,NFKB2,NR1H2,NRAS,PDGFA,PDGFD,PIK3C2A,PIK3CA,PLTP,PON3,PRKCA,PRKCE,PRKCI,RALA,RALB,RAP1A,RAP1B,RAP2A,RAP2B,RBP4,REST,RRAS2,RXRA,SOX9,TF,THRA,THRB,TP53,VCAM1
192	G Beta Gamma Signaling	3.41	0.287	3.55	AKT3,ARHGEF6,CACNA1A,CACNA1C,DNM2,EGFR,GNA12,GNAI2,GNAI3,GNAO1,GNAQ,GNB4,GNG10,GNG11,GNG12,GNG5,GRB2,ITPR2,MAPK1,MAPK3,NRAS,PDPK1,PRKACB,PRKAG1,PRKAG2,PRKCA,PRKCE,PRKCI,PRKD1,PRKD3,RALB,RAP1B,RAP2A,RAP2B,RRAS2,SHC1,SOS2			G Beta Gamma Signaling	3.04	0.209	2.858	AKT1,AKT2,AKT3,CACNA1A,CACNA1C,CAV1,CAV2,GNA13,GNAS,GNB1,GNB2,GNB4,GNG10,GNG5,HBEGF,HRAS,ITPR1,MAPK3,PRKAR1A,PRKCA,RAF1,RALB,RAP1A,RAP1B,RRAS,RRAS2,SHC1				G Beta Gamma Signaling	6.39	0.357	-3.507	AKT1,AKT2,AKT3,ARHGEF6,CACNA1A,CACNA2D1,DNM2,EGFR,GNA11,GNA12,GNA13,GNAI1,GNAI2,GNAI3,GNAO1,GNAQ,GNAS,GNB4,GNG11,GNG12,GNG5,GRB2,HBEGF,ITPR1,ITPR2,KRAS,MAPK1,NRAS,PDPK1,PRKACA,PRKACB,PRKAG1,PRKAG2,PRKCA,PRKCE,PRKCI,RALA,RALB,RAP1A,RAP1B,RAP2A,RAP2B,RRAS2,SHC1,SOS1,SOS2
193	Oxytocin in Brain Signaling Pathway	3.4	0.261	2.661	AKT3,CACNA1A,CACNA1C,Calm1 (includes others),CAMKK2,CREB1,CREB3,CREB3L2,CREB5,CREBBP,EGFR,EIF2A,GNAI2,GNAI3,GNAO1,GNAQ,GNB4,GNG10,GNG11,GNG12,GNG5,IL6,ITPR2,MAP2K1,MAPK1,MAPK3,MEF2A,MEF2D,NFKB1,NFKB2,NRAS,PIK3C2A,PIK3CA,PIK3R1,PIK3R2,PLA2G12A,PNPLA8,PRDX6,PRKCA,PRKCE,PRKCI,PRKD1,PRKD3,PTGS1,PTGS2,PTPN1,RALB,RAP1B,RAP2A,RAP2B,RRAS2,TLR4			Oxytocin in Brain Signaling Pathway	3.81	0.201	3.452	AKT1,AKT2,AKT3,ATF2,CACNA1A,CACNA1C,Calm1 (includes others),CAMKK2,CREB3L1,CREB3L2,CREB5,DDIT3,GNB1,GNB2,GNB4,GNG10,GNG5,HRAS,ITPR1,MAP2K1,MAP2K2,MAPK3,MEF2A,MEF2C,PIK3C2A,PIK3R2,PLA2G12A,PLA2G4A,PNPLA2,PNPLA8,PRDX6,PRKCA,PTGS1,RAF1,RALB,RAP1A,RAP1B,RRAS,RRAS2,TLR4				Oxytocin in Brain Signaling Pathway	4.33	0.286	-2.832	AKT1,AKT2,AKT3,ATF2,ATF4,CACNA1A,CACNA2D1,Calm1 (includes others),CAMKK2,CREB1,CREB3,CREB3L1,CREB3L2,CREB5,CREBBP,DDIT3,EGFR,EIF2A,GNA11,GNAI1,GNAI2,GNAI3,GNAO1,GNAQ,GNB4,GNG11,GNG12,GNG5,ITPR1,ITPR2,KRAS,MAP2K1,MAPK1,MEF2A,MEF2C,MEF2D,NFKB1,NFKB2,NRAS,PIK3C2A,PIK3CA,PLAAT3,PNPLA8,PRDX6,PRKCA,PRKCE,PRKCI,PTPN1,PYCARD,RALA,RALB,RAP1A,RAP1B,RAP2A,RAP2B,RRAS2,TLR4
194	Role of JAK1 and JAK3 in Œ≥c Cytokine Signaling	3.31	0.333	3.128	GRB2,IRS2,JAK1,JAK2,MAPK1,MAPK3,NRAS,PIK3C2A,PIK3CA,PIK3R1,PIK3R2,PTPN11,RALB,RAP1B,RAP2A,RAP2B,RRAS2,SHC1,SOCS1,SOCS3,STAT3,STAT5B,STAT6			Role of JAK1 and JAK3 in Œ≥c Cytokine Signaling	1.4	0.188	3.606	CRLF2,HRAS,MAPK3,PIK3C2A,PIK3R2,PTPN11,RALB,RAP1A,RAP1B,RRAS,RRAS2,SHC1,STAT6				Role of JAK1 and JAK3 in Œ≥c Cytokine Signaling	2.65	0.319	-3.411	GRB2,IRS1,IRS2,JAK1,JAK2,KRAS,MAPK1,NRAS,PIK3C2A,PIK3CA,PTPN11,RALA,RALB,RAP1A,RAP1B,RAP2A,RAP2B,RRAS2,SHC1,STAT3,STAT5B,STAT6
195	Hedgehog 'off' state	3.26	0.292	2.117	ADCY5,BTRC,CSNK1A1,CUL1,DYNC2H1,GLI3,GSK3B,ITCH,PRKACB,PSMA6,PSMB4,PSMB7,PSMC1,PSMC3,PSMD1,PSMD11,PSMD12,PSMD13,PSMD2,PSMD3,PSMD4,PSMD7,PSMD8,PSME2,PSME4,SEM1,SMO,TUBA1A,TUBA1B,TUBA1C,TUBB2A,TUBB4B,UBC			Hedgehog 'off' state	11.7	0.363	5.488	ADCY7,CSNK1A1,GNAS,GSK3B,PRKAR1A,PSMA1,PSMA2,PSMA3,PSMA5,PSMA6,PSMA7,PSMB1,PSMB2,PSMB3,PSMB4,PSMB5,PSMB6,PSMB7,PSMC1,PSMC2,PSMC4,PSMC5,PSMC6,PSMD12,PSMD13,PSMD3,PSMD4,PSMD6,PSMD7,PSMD8,PSMD9,PSME2,PSME4,PTCH1,RPS27A,TUBA1B,TUBA1C,TUBB2A,TUBB2B,TUBB4B,UBC				Hedgehog 'off' state	5.13	0.345	-3.773	ADCY7,BTRC,CSNK1A1,CUL1,DYNC2H1,GLI3,GNAS,GSK3B,IFT57,ITCH,NUMB,PRKACA,PRKACB,PSMA1,PSMA7,PSMB10,PSMB4,PSMB7,PSMB8,PSMC3,PSMC6,PSMD1,PSMD11,PSMD12,PSMD2,PSMD3,PSMD4,PSMD6,PSMD9,PSME1,PSME4,SEM1,SMO,TUBA1C,TUBB2A,TUBB4B,TUBB6,UBC,WDR35
196	Hepatic Cholestasis	3.16	0.251	2.673	ABCC1,ADCY5,AKT3,Calm1 (includes others),CHP1,CHUK,Eda,ESR1,FOXO1,GUCY1A1,GUCY1B1,HSD3B7,IL17D,IL1R1,IL1RAP,IL33,IL6,IL6R,INSR,IRAK1,IRAK3,IRF3,JUN,LBP,MAP2K1,MAP2K4,MAP3K4,MAPK1,MAPK3,MAPK8,MAPK9,MYD88,NFKB1,NFKB2,NFKBIA,NFKBIB,PPP3CA,PPP3CB,PPRC1,PRKACB,PRKAG1,PRKAG2,PRKCA,PRKCE,PRKCI,PRKD1,PRKD3,RARA,RELB,RXRA,SIRT1,STK11,TGFB2,TLR4,TNFRSF1A,TNFSF13B			Hepatic Cholestasis	0.936	0.139	2.694	ADCY7,AKT1,AKT2,AKT3,Calm1 (includes others),CHP1,ESR1,GUCY1A1,IL1R1,IL33,IRAK1,JUN,LBP,MAP2K1,MAP2K2,MAPK3,NFATC3,NR1H2,PPP3CB,PPP3R1,PRKAR1A,PRKCA,TGFB1,TGFB2,TGFB3,TLR4,TNFRSF11B,TNFRSF12A,TNFRSF1A,TNFSF12,TNFSF13B				Hepatic Cholestasis	2.09	0.238	-3.434	ADCY7,AKT1,AKT2,AKT3,ATP8B1,Calm1 (includes others),CHUK,CYP27A1,Eda,ESR1,GUCY1A1,HSD3B7,IL1R1,IL1RAP,IL33,IL6R,INSR,IRAK1,IRAK3,LBP,MAP2K1,MAP2K4,MAP3K4,MAPK1,MAPK8,NFKB1,NFKB2,NR1H2,PPP3CA,PPP3CB,PPRC1,PRKACA,PRKACB,PRKAG1,PRKAG2,PRKCA,PRKCE,PRKCI,RARA,REL,RELA,RELB,RXRA,SIRT1,SLC4A2,STK11,TGFB2,TGFB3,TJP2,TLR4,TNFRSF12A,TNFRSF1A,TNFSF13B
197	SUMOylation of DNA damage response and repair proteins	3.04	0.316	3.266	CBX4,HDAC7,HERC2,NSMCE2,NUP153,NUP98,PHC2,PHC3,PIAS1,PIAS2,RAD21,RNF2,SCMH1,SEH1L,SMC3,SMC5,SMC6,STAG1,STAG2,SUMO1,SUMO2,SUMO3,TPR,WRN			SUMOylation of DNA damage response and repair proteins	1.4	0.184	2.673	CETN2,HERC2,NSMCE3,NSMCE4A,RAE1,RNF2,SCMH1,SEH1L,SMC1A,SMC6,SUMO1,SUMO2,SUMO3,UBE2I				SUMOylation of DNA damage response and repair proteins	3.16	0.329	-3	CBX4,CETN2,HDAC7,NSMCE1,NSMCE2,NUP153,NUP98,PHC2,PHC3,PIAS2,POM121/POM121C,RAD21,RNF2,SCMH1,SEC13,SMC1A,SMC5,SMC6,STAG1,STAG2,SUMO3,TPR,UBE2I,WRN,XRCC4
198	The citric acid (TCA) cycle and respiratory electron transport	3.04	0.345	2.524	CS,DLAT,DLD,DLST,GLO1,IDH2,IDH3A,IDH3G,ME1,MPC2,OGDH,PDHA1,PDK4,RXRA,SDHA,SDHC,SUCLA2,SUCLG1,SUCLG2			The citric acid (TCA) cycle and respiratory electron transport	3.12	0.273	3.873	CS,DLD,GLO1,HAGH,IDH2,IDH3A,MDH2,ME1,MPC1,MPC2,PDHA1,SDHB,SUCLA2,SUCLG1,VDAC1				The citric acid (TCA) cycle and respiratory electron transport	3.26	0.364	-2.236	BSG,CS,DLAT,DLD,FH,IDH2,IDH3A,IDH3B,IDH3G,LDHB,ME1,MPC2,OGDH,PDK4,RXRA,SDHA,SDHC,SUCLA2,SUCLG1,SUCLG2
199	Cargo recognition for clathrin-mediated endocytosis	3.03	0.29	3.413	AAK1,AGFG1,AP2A2,Ap2b1,CLTB,CLTC,Cops2,COPS3,COPS5,COPS6,EGFR,EPN1,EPN2,EPS15L1,FCHO2,FZD4,GRB2,ITSN1,ITSN2,NECAP2,NEDD8,PICALM,SGIP1,SH3GL1,STAM,STAM2,STON1,SYT11,TOR1B,UBC,VAMP2			Cargo recognition for clathrin-mediated endocytosis	2.84	0.215	3.962	AGFG1,AP2A1,AP2S1,CLTA,CLTB,CLTC,Cops2,EPN2,FCHO2,FZD4,GPS1,HBEGF,NECAP2,NEDD8,PICALM,RPS27A,SCARB2,SH3GL1,UBC,VAMP2,VAMP4,VAMP7,WNT5A				Cargo recognition for clathrin-mediated endocytosis	10.5	0.449	-4.33	AAK1,AGFG1,AP2A2,Ap2b1,AP2M1,ARRB1,CBL,CLTB,CLTC,Cops2,COPS3,COPS4,COPS5,COPS6,COPS7A,COPS8,DAB2,EGFR,EPN1,EPS15L1,FCHO2,FZD4,GPS1,GRB2,HBEGF,IGF2R,ITSN1,ITSN2,M6PR,NECAP2,PICALM,REPS1,SGIP1,SH3GL1,SH3KBP1,STAM,STAM2,STON1,STON2,SYT11,TF,TOR1B,UBC,UBQLN1,VAMP2,VAMP4,VAMP7,WNT5A
200	TCR signaling	2.98	0.278	3.212	BTRC,CHUK,CUL1,FBXW11,NCK1,NFKB1,NFKBIA,PAK2,PAK3,PDPK1,PIK3CA,PIK3R1,PIK3R2,PSMA6,PSMB4,PSMB7,PSMC1,PSMC3,PSMD1,PSMD11,PSMD12,PSMD13,PSMD2,PSMD3,PSMD4,PSMD7,PSMD8,PSME2,PSME4,PTPRJ,RIPK2,SEM1,TAB2,UBC,UBE2D1			TCR signaling	8.8	0.31	5.925	CSK,NCK1,PAK3,PIK3R2,PSMA1,PSMA2,PSMA3,PSMA5,PSMA6,PSMA7,PSMB1,PSMB2,PSMB3,PSMB4,PSMB5,PSMB6,PSMB7,PSMC1,PSMC2,PSMC4,PSMC5,PSMC6,PSMD12,PSMD13,PSMD3,PSMD4,PSMD6,PSMD7,PSMD8,PSMD9,PSME2,PSME4,PTEN,RPS27A,UBC,UBE2D2,UBE2N,UBE2V1,VASP				TCR signaling	3.93	0.31	-3.042	BCL10,BTRC,CHUK,CUL1,FBXW11,NCK1,NFKB1,PAK2,PAK3,PDPK1,PIK3CA,PSMA1,PSMA7,PSMB10,PSMB4,PSMB7,PSMB8,PSMC3,PSMC6,PSMD1,PSMD11,PSMD12,PSMD2,PSMD3,PSMD4,PSMD6,PSMD9,PSME1,PSME4,RELA,RIPK2,SEM1,TAB2,UBC,UBE2D1,UBE2D2,UBE2N,UBE2V1,VASP
201	Opioid Signalling	2.96	0.3	2.353	ADCY5,AHCYL1,CAMK2D,CAMKK2,CREB1,GNAI2,GNAI3,GNAQ,GNB4,GNG10,GNG11,GNG12,GNG5,ITPR2,MAPK1,NBEA,PDE1A,PDE4B,PLCB1,PLCB4,PPP1CA,PPP2CA,PPP2CB,PPP3CA,PPP3CB,PRKACB,PRKCA			Opioid Signalling	3.12	0.233	2.683	ADCY7,AHCYL1,CAMK2D,CAMKK2,GNB1,GNB2,GNB4,GNG10,GNG5,GNG8,ITPR1,NBEA,PDE1A,PLA2G4A,PLCB4,PPP1CA,PPP2CA,PPP3CB,PPP3R1,PRKAR1A,PRKCA				Opioid Signalling	4.19	0.344	-4.271	ADCY7,AHCYL1,CAMK2D,CAMKK2,CREB1,GNA11,GNAI1,GNAI2,GNAI3,GNAQ,GNB4,GNG11,GNG12,GNG5,GNG8,ITPR1,ITPR2,MAPK1,NBEA,PDE1A,PLCB1,PPP1CA,PPP2CA,PPP2CB,PPP2R1A,PPP3CA,PPP3CB,PRKACA,PRKACB,PRKCA,PRKX
202	Synaptic Long Term Depression	2.94	0.253	2.714	CACNA1A,CACNA1C,GNA12,GNAI2,GNAI3,GNAO1,GNAQ,GRIA4,GUCY1A1,GUCY1A2,GUCY1B1,IGF1,IGF1R,ITPR2,MAP2K1,MAPK1,MAPK3,NPR1,NPR2,NPR3,NRAS,NT5C,PDIA3,PLA2G12A,PLCB1,PLCB4,PLCE1,PLCL1,PNPLA8,PPP2CA,PPP2CB,PPP2R2A,PPP2R2D,PPP2R3A,PPP2R5A,PPP2R5E,PRDX6,PRKCA,PRKCE,PRKCI,PRKD1,PRKD3,PRKG1,RALB,RAP1B,RAP2A,RAP2B,RRAS2,SLC39A7,SMARCC2			Synaptic Long Term Depression	1.3	0.152	2.746	CACNA1A,CACNA1C,GNA13,GNAS,GRIA4,GUCY1A1,HRAS,ITPR1,MAP2K1,MAP2K2,MAPK3,NPR2,NT5C,PDIA3,PLA2G12A,PLA2G4A,PLCB4,PLCL1,PNPLA2,PNPLA8,PPP2CA,PRDX6,PRKCA,RAF1,RALB,RAP1A,RAP1B,RRAS,RRAS2,SLC39A7				Synaptic Long Term Depression	3.02	0.263	-3.063	CACNA1A,CACNA2D1,GNA11,GNA12,GNA13,GNAI1,GNAI2,GNAI3,GNAO1,GNAQ,GNAS,GRIA3,GRIA4,GUCY1A1,GUCY1A2,IGF1R,ITPR1,ITPR2,KRAS,MAP2K1,MAPK1,NPR2,NRAS,PDIA3,PLAAT3,PLCB1,PLCE1,PLCL1,PNPLA8,PPP2CA,PPP2CB,PPP2R1A,PPP2R2A,PPP2R2D,PPP2R3A,PPP2R5A,PPP2R5E,PRDX6,PRKCA,PRKCE,PRKCI,PRKG1,PTPA,RALA,RALB,RAP1A,RAP1B,RAP2A,RAP2B,RRAS2,SLC39A7,SMARCC2
203	Necroptosis Signaling Pathway	2.93	0.265	3.28	AXL,BIRC2,BIRC3,CAMK2D,CAPN2,CAPN7,CAPNS1,CFLAR,CHP1,CHUK,CYLD,DAPK1,FKBP1A,GLUD1,GLUL,IFNAR1,IRF3,IRF9,JAK1,PAM16,PELI1,PLA2G12A,PPP3CA,PPP3CB,RB1,RBL2,SLC25A5,TAB2,TIMM23,TIMM44,TIMM9,TLR4,TNFRSF1A,TNIP1,TOMM6,TOMM7,TP53,TRPM7,TSPO,UBC,VDAC2			Necroptosis Signaling Pathway	5.27	0.239	4.11	AXL,BIRC2,CAMK2D,CAPNS1,CFLAR,CHP1,DAPK1,FKBP1A,GLUL,PAM16,PLA2G12A,PLA2G4A,PPP3CB,PPP3R1,SLC25A3,SLC25A4,SLC25A5,TIMM10,TIMM13,TIMM17A,TIMM23,TLR4,TNFRSF11B,TNFRSF1A,TOMM20,TOMM22,TOMM40,Tomm5,TOMM6,TOMM7,TOMM70,TP53,TRPM7,TSPO,UBC,VDAC1,VDAC2				Necroptosis Signaling Pathway	1.65	0.239	-2.795	CAMK2D,CAPN7,CAPNS1,CFLAR,CHUK,CYLD,DNM1L,FAS,GLUD1,GLUL,IFNAR1,JAK1,PPID,PPP3CA,PPP3CB,PYCARD,RB1,RBCK1,RBL2,STAT2,TAB2,TIMM17A,TIMM17B,TIMM22,TIMM23,TIMM50,TIMM9,TLR4,TNFRSF1A,TNIP1,TOMM34,TOMM7,TOMM70,TP53,TSPO,UBC,VDAC3
204	XBP1(S) activates chaperone genes	2.92	0.354	3.638	ACADVL,ADD1,ARFGAP1,ATP6V0D1,CTDSP2,DNAJC3,EXTL3,GFPT1,HDGF,PDIA6,PREB,SEC31A,SHC1,SRPRA,TLN1,TPP1,WIPI1			XBP1(S) activates chaperone genes	3.27	0.292	2.138	ACADVL,CXXC1,DCTN1,DNAJB11,DNAJB9,EDEM1,LMNA,MYDGF,PDIA6,SERP1,SHC1,SRPRB,SSR1,XBP1				XBP1(S) activates chaperone genes	8.14	0.542	-4.707	ACADVL,ADD1,ATP6V0D1,CTDSP2,DNAJB11,DNAJB9,DNAJC3,EXTL3,FKBP14,GFPT1,GOSR2,HYOU1,KDELR3,MYDGF,PDIA6,PREB,SEC31A,SERP1,SHC1,SRPRA,SSR1,TLN1,TPP1,WIPI1,XBP1,YIF1A
205	Signaling by FGFR2	2.92	0.315	2.711	BRAF,FGF2,FGF7,FGFR2,FRS2,GAB1,GRB2,HNRNPF,MAPK1,MAPK3,NRAS,PIK3CA,PIK3R1,POLR2A,POLR2D,PPP2CA,PPP2CB,PTPN11,RBFOX2,SHC1,TIA1,TIAL1,UBC			Signaling by FGFR2	3.51	0.26	2.982	FGFR2,HNRNPF,HNRNPH1,HRAS,MAPK3,POLR2A,POLR2C,POLR2F,POLR2G,POLR2H,POLR2J,POLR2K,PPP2CA,PTBP1,PTPN11,RPS27A,SHC1,TIA1,UBC				Signaling by FGFR2	4.34	0.37	-4.041	BRAF,CBL,FGF2,FGF7,FGFR2,FRS2,GAB1,GRB2,GTF2F1,HNRNPF,KRAS,MAPK1,NCBP2,NRAS,PIK3CA,POLR2A,POLR2E,PPP2CA,PPP2CB,PPP2R1A,PTBP1,PTPN11,RBFOX2,SHC1,SOS1,SPRY2,UBC
206	Fc Epsilon RI Signaling	2.9	0.28	3.307	AKT3,FYN,GAB1,GRB2,MAP2K1,MAP2K4,MAPK1,MAPK14,MAPK3,MAPK8,MAPK9,NRAS,OCRL,PDPK1,PIK3C2A,PIK3CA,PIK3R1,PIK3R2,PLA2G12A,PRKCA,PRKCE,PRKCI,PRKD1,PRKD3,PTPN11,RALB,RAP1B,RAP2A,RAP2B,RRAS2,SOS2,SYNJ1,SYNJ2			Fc Epsilon RI Signaling	1.43	0.169	3.578	AKT1,AKT2,AKT3,HRAS,MAP2K1,MAP2K2,MAP2K3,MAPK3,PIK3C2A,PIK3R2,PLA2G12A,PLA2G4A,PRKCA,PTPN11,RAF1,RALB,RAP1A,RAP1B,RRAS,RRAS2				Fc Epsilon RI Signaling	2.59	0.28	-2.263	AKT1,AKT2,AKT3,GAB1,GRB2,KRAS,MAP2K1,MAP2K3,MAP2K4,MAPK1,MAPK14,MAPK8,NRAS,OCRL,PDPK1,PIK3C2A,PIK3CA,PRKCA,PRKCE,PRKCI,PTPN11,RAC1,RALA,RALB,RAP1A,RAP1B,RAP2A,RAP2B,RRAS2,SOS1,SOS2,SYNJ2,VAV3
207	Glutaminergic Receptor Signaling Pathway (Enhanced)	2.85	0.231	5.196	ADCY5,AKT1S1,AKT3,BET1L,CACNA1A,CACNA1C,Calm1 (includes others),CAMK2D,CHP1,CHUK,CREB1,CREB3,CREB3L2,CREB5,CREBBP,DGKH,FMR1,GABBR1,GABRA3,GLUD1,GLUL,GNAI2,GNAI3,GNAO1,GNAQ,GOT2,GRIA4,GRIK1,GUCY1A1,GUCY1B1,HMOX1,ITPR2,MAPK1,MAPK14,MAPK3,NAPA,NFKB1,NFKB2,NR3C1,NSF,PDIA3,PIK3C2A,PIK3CA,PIK3R1,PIK3R2,PLA2G12A,PLCB1,PLCB4,PLCE1,PLCL1,PLD1,PLD3,PNPLA8,PPP3CA,PPP3CB,PRDX6,PRKACB,PRKAG1,PRKAG2,PRKCA,PRKC…			Glutaminergic Receptor Signaling Pathway (Enhanced)	1.93	0.154	3.96	ADCY7,AKT1,AKT2,AKT3,ATF2,BAD,CACNA1A,CACNA1C,Calm1 (includes others),CAMK2D,CHP1,CREB3L1,CREB3L2,CREB5,EIF4E,FMR1,GLS,GLUL,GNAS,GOT2,GPAA1,GRIA4,GRINA,GUCY1A1,ITPR1,MAPK3,NAPA,NR3C1,PDIA3,PIK3C2A,PIK3R2,PLA2G12A,PLA2G4A,PLCB4,PLCL1,PNPLA2,PNPLA8,PPP3CB,PPP3R1,PRDX6,PRKAR1A,PRKCA,RPS6KB1,SCN1B,SCN7A,SLC38A2,TGFB1,TGFB2,TGFB3,VAMP2				Glutaminergic Receptor Signaling Pathway (Enhanced)	2.92	0.24	-6.567	ADCY7,AKT1,AKT1S1,AKT2,AKT3,ATF2,ATF4,BET1L,CACNA1A,CACNA2D1,Calm1 (includes others),CAMK2D,CHUK,CREB1,CREB3,CREB3L1,CREB3L2,CREB5,CREBBP,DGKH,EIF4E,FMR1,GABBR1,GABRA3,GLS,GLUD1,GLUL,GNAI1,GNAI2,GNAI3,GNAO1,GNAQ,GNAS,GOSR2,GOT2,GRIA3,GRIA4,GRIK1,GUCY1A1,HMOX1,HOMER1,ITPR1,ITPR2,MAPK1,MAPK14,NFKB1,NFKB2,NR3C1,NSF,PDIA3,PIK3C2A,PIK3CA,PLAAT3,PLCB1,PLCE1,PLCL1,PNPLA8,PPP3CA,PPP3CB,PRDX6,PRKACA,PRKAC…
208	Signaling by BMP	2.77	0.423	3.317	ACVR2A,BMPR1A,BMPR2,CHRDL1,SMAD1,SMAD4,SMAD5,SMAD7,SMURF1,SMURF2,ZFYVE16			Signaling by BMP	0.804	0.192	2.236	BMPR1A,BMPR2,CHRDL1,SMAD4,SMAD7				Signaling by BMP	3.88	0.5	-2.496	ACVR2A,ACVRL1,BMPR1A,BMPR2,CHRDL1,SKI,SMAD1,SMAD4,SMAD5,SMAD7,SMURF1,SMURF2,ZFYVE16
209	p38 MAPK Signaling	2.77	0.275	2.414	ATF1,CREB1,CREB3,CREB3L2,CREB5,CREBBP,EEF2K,H3-3A/H3-3B,HMGN1,HSPB1,HSPB7,IL1R1,IL1RAP,IL33,IRAK1,IRAK3,MAP2K4,MAP3K5,MAPK14,MAPKAPK2,MAX,MEF2A,MEF2D,MYC,PLA2G12A,RPS6KA3,RPS6KB1,TAB2,TGFB2,TGFBR2,TIFA,TNFRSF1A,TP53			p38 MAPK Signaling	4.81	0.25	2.353	ATF1,ATF2,CREB3L1,CREB3L2,CREB5,DDIT3,EEF2K,H3-3A/H3-3B,HMGN1,HSPB1,HSPB2,HSPB7,IL1R1,IL33,IRAK1,MAP2K3,MAPKAPK2,MAX,MEF2A,MEF2C,MKNK2,PLA2G12A,PLA2G4A,RPS6KB1,TGFB1,TGFB2,TGFB3,TGFBR1,TNFRSF1A,TP53				p38 MAPK Signaling	3.06	0.292	-3.413	ATF1,ATF2,ATF4,CREB1,CREB3,CREB3L1,CREB3L2,CREB5,CREBBP,DDIT3,EEF2K,FAS,HMGN1,IL1R1,IL1RAP,IL33,IRAK1,IRAK3,MAP2K3,MAP2K4,MAP3K5,MAPK14,MAPKAPK2,MEF2A,MEF2C,MEF2D,MKNK2,RPS6KB1,TAB2,TGFB2,TGFB3,TGFBR2,TIFA,TNFRSF1A,TP53
210	Cell Cycle Checkpoints	2.74	0.235	3.25	AHCTF1,ANAPC1,ANAPC10,ANAPC11,ANAPC16,ANAPC4,ANAPC5,BABAM1,BABAM2,CDC27,CDKN1A,CDKN1B,CENPC,CLASP1,CLASP2,CLIP1,COP1,DYNC1H1,DYNC1LI2,DYNLL1,HERC2,MDM4,NDEL1,NUP98,ORC2,PAFAH1B1,PCBP4,PHF20,PPP2CA,PPP2CB,PPP2R5A,PPP2R5E,PSMA6,PSMB4,PSMB7,PSMC1,PSMC3,PSMD1,PSMD11,PSMD12,PSMD13,PSMD2,PSMD3,PSMD4,PSMD7,PSMD8,PSME2,PSME4,RAD50,RBBP8,SEH1L,SEM1,TAOK1,TP53,UBC,UBE2D1,UBE2S,UBE2V2,UIMC1,WRN,YWHAB,YWHAE,…			Cell Cycle Checkpoints	6.43	0.217	6.9	ANAPC11,ANAPC16,ANAPC5,BUB3,CDC16,CDC26,CDKN1A,CLASP2,CLIP1,COP1,DYNC1H1,HERC2,KIF2A,MAPRE1,ORC4,PCBP4,PPP2CA,PSMA1,PSMA2,PSMA3,PSMA5,PSMA6,PSMA7,PSMB1,PSMB2,PSMB3,PSMB4,PSMB5,PSMB6,PSMB7,PSMC1,PSMC2,PSMC4,PSMC5,PSMC6,PSMD12,PSMD13,PSMD3,PSMD4,PSMD6,PSMD7,PSMD8,PSMD9,PSME2,PSME4,RPS27A,SEH1L,TAOK1,TP53,UBC,UBE2E1,UBE2N,UBE2S,UBE2V2,UIMC1,YWHAE,YWHAH,YWHAQ,YWHAZ				Cell Cycle Checkpoints	5.12	0.279	-6.194	AHCTF1,ANAPC1,ANAPC10,ANAPC11,ANAPC4,ANAPC5,BABAM1,BABAM2,BUB3,CDC26,CDKN1A,CDKN1B,CENPC,CKAP5,CLASP1,CLASP2,CLIP1,COP1,DYNC1LI2,DYNLL1,DYNLL2,KIF2A,MAPRE1,MCM4,MDM4,NDEL1,NUDC,NUP98,ORC2,ORC4,ORC6,PAFAH1B1,PCBP4,PHF20,PPP2CA,PPP2CB,PPP2R1A,PPP2R5A,PPP2R5E,PSMA1,PSMA7,PSMB10,PSMB4,PSMB7,PSMB8,PSMC3,PSMC6,PSMD1,PSMD11,PSMD12,PSMD2,PSMD3,PSMD4,PSMD6,PSMD9,PSME1,PSME4,RAD50,RBBP8,RPA3,SEC13,SEM1,TAO…
211	Peroxisomal protein import	2.66	0.317	2.683	ACOX1,AGPS,CAT,DHRS4,ECH1,ECI2,HSD17B4,IDE,IDH1,LONP2,MPV17,PEX13,PEX2,PEX7,PHYH,SCP2,UBC,UBE2D1,UBE2D3,USP9X			Peroxisomal protein import	2.07	0.222	3.207	ACAA1,DHRS4,ECI2,IDH1,MPV17,NUDT19,PEX13,RPS27A,SCP2,UBC,UBE2D2,UBE2D3,USP9X,ZFAND6				Peroxisomal protein import	3.24	0.349	-3.838	ACAA1,ACOX1,AGPS,CAT,CROT,ECH1,ECI2,HSD17B4,IDE,LONP2,MPV17,PEX13,PEX2,PEX7,PHYH,SCP2,UBC,UBE2D1,UBE2D2,UBE2D3,USP9X,ZFAND6
212	Macrophage Alternative Activation Signaling Pathway	2.61	0.247	3.063	ABCA1,AKT1S1,CREB1,CREB3,CREB3L2,CREB5,CREBBP,CSF1,EIF4EBP1,FOS,GRB2,H3-3A/H3-3B,IL10RB,IL13RA1,IL33,IL6,IRS2,JAK1,JAK2,JUN,KLF4,LAMTOR1,MAF,MAPK1,MAPK14,MAPK3,MYC,NFKB1,NFKB2,NFKBIA,NFKBIB,NR3C1,PIK3C2A,PIK3CA,PIK3R1,PIK3R2,RELB,RPS6KB1,RXRA,SOCS1,SOCS3,STAT3,STAT6,TGFB2,THBS1,TLR4,ZC3H12A			Macrophage Alternative Activation Signaling Pathway	1.5	0.158	2.556	AKT2,ATF2,CEBPB,CREB3L1,CREB3L2,CREB5,CSF1,EIF4EBP1,FOS,H3-3A/H3-3B,IL13RA1,IL33,JUN,KDM6B,KLF4,LAMTOR1,LPL,MAF,MAPK3,NR1H2,NR3C1,PIK3C2A,PIK3R2,RPS6KB1,STAT6,TGFB1,TGFB2,TGFB3,TLR4,TSC22D3				Macrophage Alternative Activation Signaling Pathway	2.7	0.258	-3.286	ABCA1,ACLY,AKT1S1,AKT2,ATF2,ATF4,CEBPB,CREB1,CREB3,CREB3L1,CREB3L2,CREB5,CREBBP,CSF1,EIF4EBP1,FOS,GRB2,IL10RB,IL13RA1,IL33,IRS1,IRS2,JAK1,JAK2,KDM6B,KLF4,LAMTOR1,LPL,MAF,MAPK1,MAPK14,NFKB1,NFKB2,NR1H2,NR3C1,PIK3C2A,PIK3CA,REL,RELA,RELB,RPS6KB1,RXRA,STAT3,STAT6,TGFB2,TGFB3,THBS1,TLR4,TSC22D3
213	SPINK1 General Cancer Pathway	2.51	0.304	2.837	AKT3,EGFR,IL6,IL6R,JAK1,JAK2,MAP2K1,MAPK1,MAPK3,Mt2,NRAS,PIK3C2A,PIK3CA,PIK3R1,PIK3R2,RALB,RAP1B,RAP2A,RAP2B,RRAS2,STAT3			SPINK1 General Cancer Pathway	2.91	0.246	2.183	AKT1,AKT2,AKT3,HRAS,MAP2K1,MAP2K2,MAPK3,Mt1,Mt2,PIK3C2A,PIK3R2,RAF1,RALB,RAP1A,RAP1B,RRAS,RRAS2				SPINK1 General Cancer Pathway	3.04	0.333	-2.711	AKT1,AKT2,AKT3,EGFR,IL6R,JAK1,JAK2,KRAS,MAP2K1,MAPK1,Mt1,Mt2,NRAS,PIK3C2A,PIK3CA,RALA,RALB,RAP1A,RAP1B,RAP2A,RAP2B,RRAS2,STAT3
214	SUMOylation of chromatin organization proteins	2.51	0.321	2.357	CBX4,CBX5,CHD3,HDAC1,NUP153,NUP98,PHC2,PHC3,PIAS1,PIAS2,RNF2,SCMH1,SEH1L,SUMO1,SUMO2,SUMO3,SUZ12,TPR			SUMOylation of chromatin organization proteins	1.37	0.196	3.317	CHD3,HDAC2,RAE1,RNF2,SCMH1,SEH1L,SUMO1,SUMO2,SUMO3,SUZ12,UBE2I				SUMOylation of chromatin organization proteins	2.31	0.321	-2.828	CBX4,CBX5,CHD3,HDAC1,HDAC4,NUP153,NUP98,PHC2,PHC3,PIAS2,POM121/POM121C,RNF2,SCMH1,SEC13,SUMO3,SUZ12,TPR,UBE2I
215	Mitochondrial Fatty Acid Beta-Oxidation	2.5	0.417	2.53	ACAA2,ACADL,ACBD6,ACOT9,DECR1,ECI1,HADH,HADHA,NDUFAB1,PCCA			Mitochondrial Fatty Acid Beta-Oxidation	1.88	0.292	2.646	ACAA2,ACADL,ACBD6,DECR1,ECI1,HADH,NDUFAB1				Mitochondrial Fatty Acid Beta-Oxidation	1.83	0.375	-2.333	ACAA2,ACADL,ACBD6,ACOT9,DECR1,ECI1,HADH,HADHA,PCCA
216	ISG15 antiviral mechanism	2.35	0.296	2.4	ARIH1,EIF4A1,EIF4A2,EIF4E2,EIF4E3,EIF4G1,EIF4G3,FLNB,IRF3,ISG15,JAK1,KPNA3,KPNA4,KPNB1,MAPK3,NUP153,NUP98,PPM1B,SEH1L,TPR,UBC			ISG15 antiviral mechanism	2.77	0.239	3.153	EIF4A1,EIF4A2,EIF4A3,EIF4E,EIF4E2,EIF4G1,EIF4G2,KPNA1,KPNA3,MAPK3,PIN1,RAE1,RPS27A,SEH1L,UBC,UBE2E1,UBE2N				ISG15 antiviral mechanism	3.25	0.338	-4.082	ARIH1,EIF4A1,EIF4A2,EIF4A3,EIF4E,EIF4E2,EIF4E3,EIF4G1,EIF4G2,EIF4G3,FLNB,JAK1,KPNA1,KPNA4,KPNB1,NUP153,NUP98,PIN1,POM121/POM121C,SEC13,TPR,UBC,UBE2L6,UBE2N
217	Cilium Assembly	2.2	0.235	2.771	AHI1,ARF4,ASAP1,BBS9,CC2D2A,CCT2,CCT4,CCT5,CCT6A,CCT8,CEP164,CEP57,CEP83,CLASP1,CSNK1D,CSNK1E,DCTN2,DYNC1H1,DYNC2H1,DYNLL1,EXOC2,EXOC3,EXOC4,EXOC5,EXOC7,GBF1,HSP90AA1,IFT27,IFT43,IFT81,KIFAP3,PAFAH1B1,PCM1,PKD2,SCLT1,SDCCAG8,SMO,TCP1,TNPO1,TRIP11,TUBA1A,TUBA1B,TUBA1C,TUBB,TUBB2A,TUBB4B,YWHAE,YWHAG			Cilium Assembly	1.53	0.157	3.536	ACTR1A,ARF4,ASAP1,CCT2,CCT5,CETN2,CSNK1E,CYS1,DCTN1,DCTN2,DCTN3,DYNC1H1,DYNLRB1,EXOC5,HSP90AA1,IFT20,IFT27,LZTFL1,MAPRE1,PCM1,PDE6D,PKD1,PKD2,RAB11A,SSNA1,TNPO1,TUBA1B,TUBA1C,TUBB2A,TUBB2B,TUBB4B,YWHAE				Cilium Assembly	5.55	0.304	-4.993	AHI1,ARF4,ARL13B,ARL3,ASAP1,BBIP1,CC2D2A,CCT2,CCT3,CCT5,CCT6A,CCT8,CEP164,CEP57,CEP83,CETN2,CKAP5,CLASP1,CSNK1D,CSNK1E,CYS1,DCTN2,DYNC2H1,DYNLL1,DYNLL2,EXOC2,EXOC3,EXOC4,EXOC5,EXOC7,GBF1,HSP90AA1,IFT20,IFT27,IFT43,IFT57,IFT81,KIFAP3,LZTFL1,MAPRE1,PAFAH1B1,PCM1,PKD1,PKD2,PPP2R1A,PRKACA,RAB11A,RAB8A,SCLT1,SDCCAG8,SMO,TCP1,TNPO1,TRIP11,TUBA1C,TUBB2A,TUBB4B,TUBB6,UNC119B,WDR35,YWHAE,YWHAG
218	CGAS-STING Signaling Pathway	2.16	0.25	2.197	ABCC1,ATP6AP2,ATP6V0A1,ATP6V0B,ATP6V0C,ATP6V0D1,ATP6V0E1,ATP6V1A,ATP6V1B2,ATP6V1D,ATP6V1E1,ATP6V1F,ATP6V1H,CDKN1A,CHUK,Eda,EIF2A,GJA1,ICAM1,IL17D,IL33,IL6,IRF3,LRRC8A,MAP1LC3B,NFKB1,NFKB2,NFKBIA,PCDH7,STAT6,SURF4,TBK1,TFAM,TGFB2,TNFSF13B			CGAS-STING Signaling Pathway	1.01	0.15	3.273	ATG5,ATP6AP2,ATP6V0E1,ATP6V1A,ATP6V1C1,ATP6V1D,ATP6V1F,ATP6V1G1,ATP6V1H,BAX,CDKN1A,IL33,LRRC8A,MAP1LC3A,MAP1LC3B,STAT6,TGFB1,TGFB2,TGFB3,TNFSF12,TNFSF13B				CGAS-STING Signaling Pathway	0.779	0.207	-3.157	ATG5,ATP6AP2,ATP6V0D1,ATP6V0E1,ATP6V1A,ATP6V1B2,ATP6V1E1,ATP6V1H,CDKN1A,CHUK,Eda,EIF2A,EIF2AK3,ICAM1,IL33,LRRC8A,MAP1LC3A,NFKB1,NFKB2,PCDH7,PYCARD,RELA,STAT6,SURF4,TBK1,TFAM,TGFB2,TGFB3,TNFSF13B
219	Role of IL-17F in Allergic Inflammatory Airway Diseases	2.15	0.319	2.111	CREB1,CREB3,CREB3L2,CREB5,CREBBP,IGF1,IL17RA,IL6,MAP2K1,MAPK1,MAPK3,NFKB1,NFKB2,RELB,RPS6KA3			Role of IL-17F in Allergic Inflammatory Airway Diseases	0.832	0.17	2.449	ATF2,CREB3L1,CREB3L2,CREB5,MAP2K1,MAP2K2,MAPK3,RAF1				Role of IL-17F in Allergic Inflammatory Airway Diseases	2.38	0.34	-2.111	ATF2,ATF4,CREB1,CREB3,CREB3L1,CREB3L2,CREB5,CREBBP,IL17RA,MAP2K1,MAPK1,NFKB1,NFKB2,REL,RELA,RELB
220	Fc epsilon receptor (FCERI) signaling	2.12	0.233	3.244	AHCYL1,BTRC,CHUK,CUL1,FBXW11,FOS,FYN,GAB2,GRB2,ITPR2,JUN,MAP2K4,MAPK1,MAPK3,MAPK8,MAPK9,NFATC1,NFKB1,NFKBIA,NRAS,PAK2,PDPK1,PIK3CA,PIK3R1,PIK3R2,PPP3CA,PPP3CB,PSMA6,PSMB4,PSMB7,PSMC1,PSMC3,PSMD1,PSMD11,PSMD12,PSMD13,PSMD2,PSMD3,PSMD4,PSMD7,PSMD8,PSME2,PSME4,SEM1,SHC1,TAB2,UBC,UBE2D1			Fc epsilon receptor (FCERI) signaling	5.52	0.223	5.642	AHCYL1,FOS,GAB2,HRAS,ITPR1,JUN,MAPK3,NFATC3,PIK3R2,PPP3CB,PPP3R1,PSMA1,PSMA2,PSMA3,PSMA5,PSMA6,PSMA7,PSMB1,PSMB2,PSMB3,PSMB4,PSMB5,PSMB6,PSMB7,PSMC1,PSMC2,PSMC4,PSMC5,PSMC6,PSMD12,PSMD13,PSMD3,PSMD4,PSMD6,PSMD7,PSMD8,PSMD9,PSME2,PSME4,RASGRP2,RPS27A,SHC1,UBC,UBE2D2,UBE2N,UBE2V1				Fc epsilon receptor (FCERI) signaling	2.85	0.257	-2.828	AHCYL1,BCL10,BTRC,CHUK,CUL1,FBXW11,FOS,GAB2,GRB2,ITPR1,ITPR2,KRAS,MAP2K4,MAPK1,MAPK8,NFATC1,NFKB1,NRAS,PAK2,PDPK1,PIK3CA,PPP3CA,PPP3CB,PSMA1,PSMA7,PSMB10,PSMB4,PSMB7,PSMB8,PSMC3,PSMC6,PSMD1,PSMD11,PSMD12,PSMD2,PSMD3,PSMD4,PSMD6,PSMD9,PSME1,PSME4,RAC1,RELA,SEM1,SHC1,SOS1,TAB2,UBC,UBE2D1,UBE2D2,UBE2N,UBE2V1,VAV3
221	Neutrophil Extracellular Trap Signaling Pathway	2.1	0.212	3.362	AKT3,CASP4,CHP1,COL12A1,COL15A1,COL16A1,COL1A1,COL3A1,COL4A2,COL4A5,COL5A2,COL6A1,COL6A2,COL6A3,COL8A1,DOCK1,FYN,HIF1A,IFNAR1,ITGB1,ITPR2,MAP2K1,MAP2K4,MAP2K5,MAPK1,MAPK14,MAPK3,MAPK8,MAPK9,MCL1,MMP2,NDUFA10,NDUFA13,NDUFA2,NDUFA4,NDUFA5,NDUFA6,NDUFA7,NDUFA9,NDUFAB1,NDUFB11,NDUFS1,NDUFS3,NDUFS4,NDUFS6,NDUFS7,NDUFS8,NDUFV1,NDUFV3,NFKB1,NFKB2,NOX4,PAM16,PDIA3,PIK3C2A,PIK3CA,PIK3R1,PIK3R2,PLA2G12A,PL…			Neutrophil Extracellular Trap Signaling Pathway	9.21	0.217	5.039	AKT1,AKT2,AKT3,CASP4,CHP1,COL12A1,COL15A1,COL1A1,COL1A2,COL3A1,COL4A1,COL4A2,COL4A3,COL4A4,COL4A5,COL6A1,COL6A2,COL6A6,CYC1,HIF1A,ITGB1,ITPR1,MAP2K1,MAP2K2,MAP2K3,MAPK3,MMP2,NDUFA11,NDUFA12,NDUFA2,NDUFA3,NDUFA4L2,NDUFA5,NDUFA7,NDUFA8,NDUFA9,NDUFAB1,NDUFB10,NDUFB11,NDUFB2,NDUFB3,NDUFB5,NDUFB6,NDUFB8,NDUFB9,NDUFS2,NDUFS3,NDUFS4,NDUFS8,NDUFV1,NDUFV2,NDUFV3,NOX4,PAM16,PDIA3,PIK3C2A,PIK3R2,PLA2G12A,PL…				Neutrophil Extracellular Trap Signaling Pathway	0.375	0.177	-2.492	AKT1,AKT2,AKT3,COL1A1,COL1A2,COL3A1,COL4A5,COL4A6,COL5A1,COL6A1,COL6A2,COL8A1,DOCK1,HIF1A,IFNAR1,ITGB1,ITPR1,ITPR2,MAP2K1,MAP2K3,MAP2K4,MAP2K5,MAPK1,MAPK14,MAPK8,MCL1,MMP2,NDUFA4,NDUFA4L2,NDUFA9,NDUFB11,NDUFS1,NDUFS4,NDUFS8,NDUFV1,NFKB1,NFKB2,ORAI3,PDIA3,PIK3C2A,PIK3CA,PLAAT3,PLCB1,PLCE1,PLCL1,PNPLA8,PPID,PPP3CA,PPP3CB,PRDX6,PRKCA,PRKCE,PRKCI,PYCARD,RAC1,SDHA,SDHC,TIMM17A,TIMM17B,TIMM22,TIMM23,TI…
222	Integrin signaling	2.07	0.37	3.162	APBB1IP,CRK,FN1,GRB2,PDPK1,PTK2,PTPN1,RAP1B,SHC1,TLN1			Integrin Signaling	16.3	0.325	4.572	ABL1,ACTA2,ACTG1,ACTN1,ACTN4,ACTR2,ACTR3,AKT1,AKT2,AKT3,ARF3,ARF4,ARF5,ARHGAP5,ARPC1B,ARPC2,ARPC3,ARPC4,ARPC5,ARPC5L,ASAP1,CAPNS1,CAV1,CRK,GSK3B,GSN,HRAS,ILK,ILKAP,ITGA8,ITGAV,ITGB1,ITGB5,MAP2K1,MAP2K2,MAPK3,MYL12A,MYL12B,MYL9,NCK1,PAK3,PFN1,PFN2,PIK3C2A,PIK3R2,PPP1CB,PTEN,PTK2,PXN,RAF1,RALB,RAP1A,RAP1B,RHOA,RHOBTB1,RHOC,RHOJ,RHOQ,RND3,ROCK1,RRAS,RRAS2,SHC1,TSPAN3,TSPAN4,TSPAN6,VASP,Wasl,ZYX				Integrin Signaling	14.5	0.401	-3.623	ABL1,ACTA2,ACTG1,ACTN1,ACTN4,ACTR3,AKT1,AKT2,AKT3,ARF1,Arf2,ARF3,ARF4,ARHGAP5,ARPC1B,ARPC2,ARPC4,ARPC5,ASAP1,BRAF,CAPN7,CAPNS1,CRK,CRKL,CTTN,DOCK1,FNBP1,GRB2,GSK3B,GSN,ITGA1,ITGA9,ITGAV,ITGB1,ITGB5,ITGB8,KRAS,LIMS1,MAP2K1,MAP2K4,MAPK1,MAPK8,MPRIP,MYL9,NCK1,NEDD9,NRAS,PAK2,PAK3,PARVA,PFN1,PFN2,PIK3C2A,PIK3CA,PIKFYVE,PPP1CB,PPP1R12A,Ppp1r12b,PTK2,PXN,RAC1,RALA,RALB,RAP1A,RAP1B,RAP2A,RAP2B,RHOB,RHOJ…
223	O-linked glycosylation	1.89	0.252	4.158	ADAMTS12,ADAMTS2,ADAMTS5,ADAMTS6,ADAMTSL1,ADAMTSL3,B3GLCT,B3GNT2,B3GNT9,B4GALT5,B4GAT1,C1GALT1,DAG1,GALNT1,GALNT11,GALNT15,GALNT16,GALNT17,GALNT2,GALNT7,LARGE1,POFUT2,SEMA5A,ST3GAL1,ST3GAL2,THBS1,THBS2,THSD7A			O-linked glycosylation	0.328	0.117	3.051	ADAMTS1,ADAMTS2,ADAMTS6,ADAMTSL1,ADAMTSL3,ADAMTSL4,B3GNT2,C1GALT1,GALNT15,GALNT16,POFUT2,SPON1,THBS2				O-linked glycosylation	1.91	0.261	-3.9	ADAMTS1,ADAMTS10,ADAMTS12,ADAMTS2,ADAMTS5,ADAMTS6,ADAMTSL1,ADAMTSL2,ADAMTSL3,ADAMTSL5,B3GLCT,B3GNT2,B3GNT9,B4GALT5,DAG1,GALNT1,GALNT11,GALNT17,GALNT2,GALNT7,LARGE1,POFUT2,SPON1,ST3GAL1,ST3GAL2,ST3GAL4,THBS1,THBS2,THSD7A
224	RNA Polymerase I Transcription	1.89	0.3	2.324	CAVIN1,CCNH,CDK7,CHD3,CHD4,EHMT2,GATAD2A,GATAD2B,GTF2H1,HDAC1,KAT2B,MAPK3,MNAT1,MTA3,RBBP7			RNA Polymerase I Transcription	4.19	0.32	2	CAVIN1,CCNH,CHD3,GTF2H5,HDAC2,KAT2B,MAPK3,MBD3,MTA1,POLR1D,POLR2F,POLR2H,POLR2K,RBBP4,RBBP7,TAF1D				RNA Polymerase I Transcription	1.1	0.26	-3.606	CCNH,CHD3,CHD4,GATAD2A,GATAD2B,GTF2H1,HDAC1,KAT2B,MNAT1,MTA3,POLR2E,RBBP7,UBTF
225	Fcgamma receptor (FCGR) dependent phagocytosis	1.83	0.236	4	ABI1,ABI2,ABL1,ACTB,ACTG1,ACTR3,AHCYL1,ARPC1B,ARPC2,ARPC5,CRK,CYFIP1,DOCK1,ELMO1,ELMO2,FYN,GRB2,HSP90AA1,HSP90AB1,ITPR2,MAPK1,MAPK3,MYH9,MYO10,MYO1C,MYO5A,MYO9B,NCK1,NCKAP1,NF2,PIK3CA,PIK3R1,PIK3R2,PRKCE,PTK2,WASF2,YES1			Fcgamma receptor (FCGR) dependent phagocytosis	1.17	0.153	3.128	ABL1,ACTG1,ACTR2,ACTR3,AHCYL1,ARPC1B,ARPC2,ARPC3,ARPC4,ARPC5,BAIAP2,BRK1,CFL1,CRK,HSP90AA1,HSP90AB1,ITPR1,MAPK3,MYH9,MYO1C,NCK1,NCKAP1,PIK3R2,PTK2				Fcgamma receptor (FCGR) dependent phagocytosis	1.38	0.229	-3.773	ABI1,ABI2,ABL1,ACTG1,ACTR3,AHCYL1,ARPC1B,ARPC2,ARPC4,ARPC5,CFL1,CRK,DOCK1,ELMO1,ELMO2,GRB2,HSP90AA1,HSP90AB1,ITPR1,ITPR2,MAPK1,MYH9,MYO10,MYO1C,MYO5A,MYO9B,NCK1,NF2,PIK3CA,PRKCE,PTK2,RAC1,VAV3,WASF2,WIPF1,YES1
226	White Adipose Tissue Browning Pathway	1.78	0.239	3.053	ADCY5,ANGPT2,CACNA1A,CACNA1C,CAMKK2,CREB1,CREB3,CREB3L2,CREB5,CREBBP,DIO2,FGFR1,FGFR2,FOXC2,GUCY1A1,GUCY1A2,GUCY1B1,ITPR2,MAPK1,MAPK14,NPR1,NRF1,PRKACB,PRKAG1,PRKAG2,PRKG1,RARA,RARG,RUNX1T1,RXRA,SIRT1,THRB,VEGFA			White Adipose Tissue Browning Pathway	1.27	0.159	2.524	ADCY7,ANGPT2,ATF2,CACNA1A,CACNA1C,CAMKK2,CEBPB,CREB3L1,CREB3L2,CREB5,CTBP1,FGFR1,FGFR2,FGFRL1,GNAS,GUCY1A1,ITPR1,NDN,PRKAR1A,RARG,RUNX1T1,THRB				White Adipose Tissue Browning Pathway	3.99	0.304	-4.218	ADCY7,ANGPT2,ATF2,ATF4,CACNA1A,CACNA2D1,CAMKK2,CEBPB,CREB1,CREB3,CREB3L1,CREB3L2,CREB5,CREBBP,CTBP1,FGFR1,FGFR2,FGFRL1,FOXC2,GNAS,GUCY1A1,GUCY1A2,ITPR1,ITPR2,LDHB,MAPK1,MAPK14,NDN,NRF1,PRKAB2,PRKACA,PRKACB,PRKAG1,PRKAG2,PRKG1,RARA,RARG,RUNX1T1,RXRA,SIRT1,THRA,THRB
227	Degradation of the extracellular matrix	1.72	0.273	3.771	ADAM10,ADAMTS5,CAPNS1,CTSK,CTSV,DCN,ELN,FBN1,FN1,HSPG2,LAMB1,LAMC1,MMP14,MMP19,MMP2,MMP3,NCSTN,NID1			Degradation of the extracellular matrix	1.89	0.212	2.138	ADAMTS1,BMP1,CAPNS1,CTSK,CTSV,DCN,FBN1,FN1,HTRA1,LAMB1,LAMC1,MMP2,NCSTN,NID1				Degradation of the extracellular matrix	1.55	0.273	-2.357	ADAM10,ADAM15,ADAMTS1,ADAMTS5,BSG,CAPNS1,CD44,CTSK,DCN,FBN1,LAMB1,LAMC1,MMP14,MMP19,MMP2,MMP3,NID1,PSEN1
228	Signaling by the B Cell Receptor (BCR)	1.72	0.229	2.271	AHCYL1,BTRC,CHUK,CUL1,FBXW11,FKBP1A,FYN,GRB2,ITPR2,NCK1,NFATC1,NFKB1,NFKBIA,NFKBIB,NRAS,PIK3R1,PPIA,PPP3CA,PPP3CB,PSMA6,PSMB4,PSMB7,PSMC1,PSMC3,PSMD1,PSMD11,PSMD12,PSMD13,PSMD2,PSMD3,PSMD4,PSMD7,PSMD8,PSME2,PSME4,SEM1,STIM1,TRPC1,UBC			Signaling by the B Cell Receptor (BCR)	5.07	0.229	5.516	AHCYL1,FKBP1A,HRAS,ITPR1,NCK1,NFATC3,PPIA,PPP3CB,PPP3R1,PSMA1,PSMA2,PSMA3,PSMA5,PSMA6,PSMA7,PSMB1,PSMB2,PSMB3,PSMB4,PSMB5,PSMB6,PSMB7,PSMC1,PSMC2,PSMC4,PSMC5,PSMC6,PSMD12,PSMD13,PSMD3,PSMD4,PSMD6,PSMD7,PSMD8,PSMD9,PSME2,PSME4,RPS27A,UBC				Signaling by the B Cell Receptor (BCR)	2.06	0.247	-3.162	AHCYL1,BCL10,BTRC,CHUK,CUL1,FBXW11,GRB2,ITPR1,ITPR2,KRAS,NCK1,NFATC1,NFKB1,NRAS,PPIA,PPP3CA,PPP3CB,PSMA1,PSMA7,PSMB10,PSMB4,PSMB7,PSMB8,PSMC3,PSMC6,PSMD1,PSMD11,PSMD12,PSMD2,PSMD3,PSMD4,PSMD6,PSMD9,PSME1,PSME4,REL,RELA,SEM1,SH3KBP1,SOS1,TRPC1,UBC
229	Plasma lipoprotein assembly, remodeling, and clearance	1.69	0.263	2.683	ABCA1,ANGPTL4,AP2A2,CLTC,FURIN,HDLBP,LIPA,LMF2,MBTPS1,MYLIP,NPC1,NPC2,P4HB,PCSK5,PCSK6,PLTP,PRKACB,UBC,VLDLR,ZDHHC8			Plasma lipoprotein assembly, remodeling, and clearance	2.06	0.211	2	ANGPTL4,AP2A1,AP2S1,APOE,BMP1,CLTA,CLTC,FURIN,LPL,MYLIP,NPC2,NR1H2,RPS27A,SAR1B,UBC,ZDHHC8				Plasma lipoprotein assembly, remodeling, and clearance	1.25	0.25	-3.441	ABCA1,ANGPTL4,AP2A2,AP2M1,APOE,CLTC,HDLBP,LIPA,LMF2,LPL,MBTPS1,MYLIP,NR1H2,P4HB,PLTP,PRKACA,PRKACB,SOAT1,UBC
230	DNA Damage Bypass	1.69	0.292	2.673	CUL4A,DDB1,ISG15,PCNA,POLD4,REV1,REV3L,RFC1,UBC,UBE2B,UFD1,USP1,VCP,WDR48			DNA Damage Bypass	1.09	0.188	2.333	CUL4B,PCNA,POLD4,RCHY1,RPS27A,UBC,UBE2B,UFD1,USP1				DNA Damage Bypass	2.28	0.333	-3	CUL4A,CUL4B,DDB1,PCNA,POLD4,POLE3,POLE4,REV3L,RFC1,RPA3,UBC,UBE2B,UBE2L6,USP1,VCP,WDR48
231	Cohesin Chromatin Regulation Pathway	1.59	0.215	2.61	ANAPC1,ANAPC10,ANAPC11,ANAPC4,ANAPC5,ATRX,CBX5,CDC27,CDK19,CDK8,CTCF,DDX5,ESCO1,ESR1,FAT1,FTO,HDAC8,HP1BP3,MAU2,MECP2,MED13,MED13L,MED14,MED15,MED31,MED6,Meg3,MYC,NIPBL,NUMA1,PCDH19,PCDH7,PCDH9,PDS5A,POLR2A,POLR2D,PPP2CA,PPP2CB,PPP2R2A,PPP2R2D,PPP2R3A,PPP2R5A,PPP2R5E,PTGER4,PTTG1,RAD21,SMARCA5,SMC3,SMC4,STAG1,STAG2,TERF1,WAPL			Cohesin Chromatin Regulation Pathway	0.806	0.134	3.656	ANAPC11,ANAPC13,ANAPC5,ATRX,CBX3,CCNC,CDC16,CDC26,CDK8,ESR1,FAT1,MED10,MED13,MED13L,MED14,MED21,MED25,MED30,MED31,MED6,NCAPH2,POLR2A,POLR2C,POLR2F,POLR2G,POLR2H,POLR2J,POLR2K,PPP2CA,PTTG1,SMARCA5,SMC1A,SRA1				Cohesin Chromatin Regulation Pathway	1.93	0.231	-5.166	ANAPC1,ANAPC10,ANAPC11,ANAPC13,ANAPC4,ANAPC5,ATRX,CBX1,CBX3,CBX5,CCNC,CDC26,CDK8,CTCF,DCHS1,DDX5,ESCO1,ESR1,FAT1,FTO,HDAC8,HP1BP3,MAU2,MECP2,MED1,MED10,MED13,MED14,MED6,MED8,Meg3,NIPBL,NUMA1,PCDH11X,PCDH18,PCDH7,PCDH9,PDS5A,POLR2A,POLR2E,PPP2CA,PPP2CB,PPP2R1A,PPP2R2A,PPP2R2D,PPP2R3A,PPP2R5A,PPP2R5E,PTPA,RAD21,SMARCA5,SMC1A,SMC4,SRA1,STAG1,STAG2,WAPL
235	Integration of energy metabolism	1.55	0.243	3.638	ACSL4,ADCY5,ADIPOR1,ADIPOR2,AHCYL1,CACNA1A,CACNA1C,GNAI2,GNAQ,GNB4,GNG10,GNG11,GNG12,GNG5,IQGAP1,ITPR2,PLCB1,PPP2CA,PPP2CB,PRKACB,PRKAG2,PRKCA,STK11,STXBP1,VAMP2			Integration of energy metabolism	1.45	0.175	2.111	ADCY7,AHCYL1,CACNA1A,CACNA1C,GNAS,GNB1,GNB2,GNB4,GNG10,GNG5,GNG8,ITPR1,PPP2CA,PRKAR1A,PRKCA,RAP1A,TKT,VAMP2				Integration of energy metabolism	4.11	0.33	-3.4	ACLY,ACSL4,ADCY7,ADIPOR2,AHCYL1,CACNA1A,GNA11,GNAI1,GNAI2,GNAQ,GNAS,GNB4,GNG11,GNG12,GNG5,GNG8,IQGAP1,ITPR1,ITPR2,PLCB1,PPP2CA,PPP2CB,PPP2R1A,PRKAB2,PRKACA,PRKACB,PRKAG2,PRKCA,RAP1A,STK11,STXBP1,TALDO1,TKT,VAMP2
233	Mitotic Prophase	1.55	0.243	3	CTDNEP1,EMD,ENSA,GOLGA2,GORASP2,MAPK1,MAPK3,NEK7,NEK9,NUMA1,NUP153,NUP98,PHF8,PPP2CA,PPP2CB,PPP2R2D,PRKCA,RAB1B,RB1,SEH1L,SET,SMC4,TMPO,TPR,USO1			Mitotic Prophase	1.2	0.165	3.638	ARPP19,CNEP1R1,EMD,ENSA,GOLGA2,GORASP2,LMNA,MAPK3,NCAPH2,PPP2CA,PRKCA,RAB1A,RAB1B,RAE1,SEH1L,SET,TMPO				Mitotic Prophase	2.1	0.272	-4.158	BANF1,EMD,ENSA,GOLGA2,GORASP2,MAPK1,NEK7,NEK9,NUMA1,NUP153,NUP98,PHF8,POM121/POM121C,PPP2CA,PPP2CB,PPP2R1A,PPP2R2D,PRKCA,RAB1B,RAB2A,RB1,SEC13,SET,SMC4,TMPO,TPR,USO1,VRK2
234	Ion channel transport	1.44	0.219	3.363	ANO10,ANO6,ASPH,ATP10A,ATP11A,ATP11B,ATP11C,ATP1A1,ATP2B1,ATP2B4,ATP2C1,ATP6V0A1,ATP6V0B,ATP6V0C,ATP6V0D1,ATP6V0E1,ATP6V1A,ATP6V1B2,ATP6V1D,ATP6V1E1,ATP6V1F,ATP6V1H,ATP7A,ATP9B,CAMK2D,CLCN3,CLCN4,CLCN5,FXYD1,FXYD6,NALCN,NEDD4L,OSTM1,TRPC1,TRPC4AP,TRPM3,TRPM7,UBC,WNK1,WWP1			Ion channel transport	0.933	0.142	4.082	ANO6,ASPH,ATP11A,ATP1A1,ATP1B1,ATP1B3,ATP2B1,ATP2C1,ATP6V0E1,ATP6V1A,ATP6V1C1,ATP6V1D,ATP6V1F,ATP6V1G1,ATP6V1H,ATP9A,CAMK2D,FXYD6,NALCN,RAF1,RPS27A,SRI,TRPM7,TSC22D3,UBC,WWP1				Ion channel transport	0.902	0.208	-2.137	ANO10,ANO6,ASPH,ATP10A,ATP11A,ATP11B,ATP11C,ATP1A2,ATP2A2,ATP2B1,ATP2B4,ATP6V0D1,ATP6V0E1,ATP6V1A,ATP6V1B2,ATP6V1E1,ATP6V1H,ATP7A,ATP8B1,ATP9A,ATP9B,CAMK2D,CLCN4,CLCN5,FXYD1,FXYD6,NALCN,NEDD4L,OSTM1,PDZD11,SRI,TPCN1,TRPC1,TRPC4AP,TSC22D3,UBC,WNK1,WWP1
	Neurotransmitter release cycle	1.25	0.275	2.714	APBA1,ARL6IP5,CASK,NAAA,PPFIA1,SLC1A3,SLC38A2,STXBP1,SYN3,UNC13B,VAMP2			Neurotransmitter release cycle	0.819	0.175	2.646	ARL6IP5,GLS,LIN7C,RAB3A,SLC38A2,SYN3,VAMP2				Neurotransmitter release cycle	0.853	0.25	-2.53	APBA1,ARL6IP5,CASK,GLS,NAAA,PPFIA1,SLC1A3,STXBP1,UNC13B,VAMP2
	SNARE Signaling Pathway	1.24	0.221	2.191	ADCY5,BET1L,Calm1 (includes others),CAMK2D,DNAJC5,GUCY1A1,GUCY1B1,HSPA8,MYH11,MYH9,MYL6,MYL9,MYO10,MYO18A,NAPA,NSF,PRKACB,PRKAG1,PRKAG2,RAB22A,RAB7A,SNAP23,STX16,STXBP1,STXBP5,SYN3,SYT11,VAMP2,VTI1A,YKT6			SNARE Signaling Pathway	1.33	0.162	2.132	ADCY7,Calm1 (includes others),CAMK2D,GPAA1,GUCY1A1,HSPA8,MYH11,MYH9,MYL6,MYL9,NAPA,PRKAR1A,RAB11A,RAB1A,RAB3A,RAB6A,RAB7A,SGTA,SNAP23,STXBP3,SYN3,VAMP2				SNARE Signaling Pathway	1.62	0.243	-4.7	ADCY7,BET1L,CACNA2D1,Calm1 (includes others),CAMK2D,DNAJC5,GOSR2,GUCY1A1,MYH10,MYH11,MYH9,MYL9,MYO10,MYO18A,NSF,PRKACA,PRKACB,PRKAG1,PRKAG2,RAB11A,RAB22A,RAB2A,RAB7A,RAB8A,SGTA,SNAP23,STX16,STXBP1,STXBP5,SYT11,VAMP2,VTI1A,YKT6
	DAG and IP3 signaling	1.18	0.268	2.53	ADCY5,AHCYL1,CAMK2D,CAMKK2,CREB1,ITPR2,NBEA,PDE1A,PRKACB,PRKCA,PRKCE			DAG and IP3 signaling	1.47	0.22	2.121	ADCY7,AHCYL1,CAMK2D,CAMKK2,ITPR1,NBEA,PDE1A,PRKAR1A,PRKCA				DAG and IP3 signaling	2.16	0.341	-2.887	ADCY7,AHCYL1,CAMK2D,CAMKK2,CREB1,ITPR1,ITPR2,NBEA,PDE1A,PRKACA,PRKACB,PRKCA,PRKCE,PRKX
	Multiple Sclerosis Signaling Pathway	1.08	0.203	4.323	AEBP2,BRAF,C2,C3,C7,CAPN2,CAPN7,CAPNS1,Eda,EZH2,HLA-A,HLA-E,HLA-G,IFNGR1,IFNGR2,IL17D,IL17RA,IL33,IL6,JARID2,MAPK1,MAPK14,MAPK3,MTF2,NCOA3,NFKB1,NFKB2,P2RX4,PARP3,PARP4,PARP8,RBBP7,RNF213,SLC8A1,SLC8B1,STK38,SUZ12,TGFB2,TLR4,TNFRSF1A,TNFSF13B,TNKS,TNKS2,UBR2,YY1			Multiple Sclerosis Signaling Pathway	0.371	0.117	3.922	BAX,C2,C7,CAPNS1,GAS5,GRINA,HLA-A,HLA-E,IFNGR2,IL33,MAPK3,P2RX4,RBBP4,RBBP7,SLC8B1,STK38,SUZ12,TGFB1,TGFB2,TGFB3,TLR4,TNFRSF1A,TNFSF12,TNFSF13B,TNKS,YY1				Multiple Sclerosis Signaling Pathway	0.548	0.189	-4.32	AEBP2,BRAF,C2,C3,C7,CAPN7,CAPNS1,Eda,EZH2,FAS,HLA-A,HLA-G,IFNGR2,IL17RA,IL33,JARID2,MAPK1,MAPK14,NCOA3,NFKB1,NFKB2,P2RX4,PARP14,PARP3,PARP4,PARP8,PYCARD,RBBP7,RNF213,SLC8A1,SLC8B1,SUZ12,TGFB2,TGFB3,TIPARP,TLR4,TNFRSF1A,TNFSF13B,TNKS,TNKS2,UBR2,YY1
	Glycerophospholipid biosynthesis	1.06	0.222	3.838	ABHD4,AGPAT3,AGPAT4,AGPAT5,CDS2,CHPT1,CPNE1,CSNK2A1,CSNK2A2,DGAT1,ETNK1,GPAT4,GPCPD1,HADHA,LPGAT1,MGLL,PITPNB,PLA2G12A,PLD1,PLD3,SLC44A1,SLC44A2			Glycerophospholipid biosynthesis	1.09	0.162	3	AGPAT3,AGPAT4,CDS2,CEPT1,CHKA,CHKB,CHPT1,CPNE1,CSNK2A1,CSNK2B,GPCPD1,OSBPL8,PLA2G12A,PLA2G4A,PNPLA2,SLC44A2				Glycerophospholipid biosynthesis	1.31	0.242	-3.266	ABHD4,AGPAT3,AGPAT4,AGPAT5,CDS2,CHKA,CHKB,CHPT1,CPNE1,CPNE3,CSNK2A1,CSNK2A2,DGAT1,ETNK1,GPAT4,GPCPD1,HADHA,LPGAT1,MGLL,OSBPL8,PITPNB,PLAAT3,SLC44A1,SLC44A2
	DNA Double Strand Break Response	1	0.237	2.673	ABL1,BABAM1,BABAM2,BAZ1B,EYA4,HERC2,MAPK8,RAD50,SMARCA5,SUMO1,TP53,UBC,UBE2V2,UIMC1			DNA Double Strand Break Response	1.93	0.22	3.051	ABL1,HERC2,PPP5C,RPS27A,SMARCA5,SUMO1,TP53,UBC,UBE2I,UBE2N,UBE2V2,UBXN1,UIMC1				DNA Double Strand Break Response	0.89	0.237	-2.673	ABL1,BABAM1,BABAM2,BAZ1B,EYA4,MAPK8,RAD50,SMARCA5,TP53,UBC,UBE2I,UBE2N,UBE2V2,UIMC1
	Glutamate binding, activation of AMPA receptors and synaptic plasticity	0.831	0.25	2.828	AP2A2,Ap2b1,CAMK2D,DLG1,GRIA4,MYO6,NSF,PRKCA			Glutamate binding, activation of AMPA receptors and synaptic plasticity	0.55	0.156	2.236	AP2A1,AP2S1,CAMK2D,GRIA4,PRKCA				Glutamate binding, activation of AMPA receptors and synaptic plasticity	1.82	0.344	-2.714	AP2A2,Ap2b1,AP2M1,CAMK2D,DLG1,DLG4,GRIA3,GRIA4,MYO6,NSF,PRKCA
	CDP-diacylglycerol Biosynthesis I	0.771	0.25	2.646	ABHD5,AGPAT3,AGPAT4,AGPAT5,CDS2,GPAT4,LPGAT1			CDP-diacylglycerol Biosynthesis I	0.419	0.143	2	ABHD5,AGPAT3,AGPAT4,CDS2				CDP-diacylglycerol Biosynthesis I	0.704	0.25	-2.646	ABHD5,AGPAT3,AGPAT4,AGPAT5,CDS2,GPAT4,LPGAT1
	TP53 Regulates Transcription of Cell Death Genes	0.74	0.227	2.53	BCL6,BNIP3L,CRADD,CREBBP,NDRG1,PRELID1,STEAP3,TMEM219,TP53,TP53INP1			TP53 Regulates Transcription of Cell Death Genes	1.68	0.227	2.53	BAX,BCL6,BNIP3L,NDRG1,PRELID1,RABGGTB,STEAP3,TMEM219,TP53,TP53INP1				TP53 Regulates Transcription of Cell Death Genes	0.901	0.25	-2.111	APAF1,BCL6,CHM,CREBBP,FAS,NDRG1,PRELID1,STEAP3,TMEM219,TP53,TP53BP2
	Cell Cycle Control of Chromosomal Replication	0.683	0.214	2.887	CDK11A,CDK12,CDK13,CDK14,CDK16,CDK17,CDK19,CDK7,CDK8,ORC2,PCNA,TOP2B			Cell Cycle Control of Chromosomal Replication	0.548	0.143	2.828	CDK11A,CDK16,CDK4,CDK8,CDK9,ORC4,PCNA,TOP2B				Cell Cycle Control of Chromosomal Replication	1.31	0.268	-2.84	CDK11A,CDK12,CDK13,CDK14,CDK16,CDK17,CDK4,CDK8,MCM4,ORC2,ORC4,ORC6,PCNA,RPA3,TOP2B
	Triacylglycerol Biosynthesis	0.683	0.214	2.333	ABHD5,AGPAT3,AGPAT4,AGPAT5,DGAT1,GPAT4,LPGAT1,OSGEP,PLPP3,PLPP5,SIRT1,SIRT2			Triacylglycerol Biosynthesis	0	0.107	2.236	ABHD5,AGPAT3,AGPAT4,ELOVL1,OSGEP,PLPP3				Triacylglycerol Biosynthesis	1.04	0.25	-2.714	ABHD5,AGPAT3,AGPAT4,AGPAT5,DGAT1,ELOVL1,GPAT4,LPGAT1,OSGEP,Plpp1,PLPP3,PLPP5,SIRT1,SIRT2
	Th1 Pathway	0.682	0.197	4.491	APH1A,GRB2,HLA-A,ICAM1,IFNAR1,IFNGR1,IFNGR2,IL10RB,IL6,IL6R,JAK1,JAK2,NCSTN,NFATC1,NFIL3,NFKB1,PIK3C2A,PIK3CA,PIK3R1,PIK3R2,PSEN2,SOCS1,SOCS3,STAT3			Th1 Pathway	0	0.0656	2.828	APH1A,HLA-A,IFNGR2,NCSTN,NFATC3,PIK3C2A,PIK3R2,PSENEN				Th1 Pathway	0	0.164	-2.683	APH1A,GRB2,HLA-A,ICAM1,IFNAR1,IFNGR2,IL10RB,IL6R,JAK1,JAK2,NFATC1,NFIL3,NFKB1,NOTCH2,PIK3C2A,PIK3CA,PSEN1,PSEN2,PSENEN,STAT3
	Phosphatidylglycerol Biosynthesis II (Non-plastidic)	0.66	0.233	2.646	ABHD5,AGPAT3,AGPAT4,AGPAT5,CDS2,GPAT4,LPGAT1			Phosphatidylglycerol Biosynthesis II (Non-plastidic)	0.624	0.167	2.236	ABHD5,AGPAT3,AGPAT4,CDS2,PTPMT1				Phosphatidylglycerol Biosynthesis II (Non-plastidic)	0.598	0.233	-2.646	ABHD5,AGPAT3,AGPAT4,AGPAT5,CDS2,GPAT4,LPGAT1
	G-Protein Coupled Receptor Signaling	0.635	0.176	5.5	ADCY5,ADGRD1,AKT3,BRAF,Calm1 (includes others),CAMK2D,CHP1,CHUK,CREB1,CREB3,CREB3L2,CREB5,CREBBP,CRK,EDNRA,FOS,FOXO1,FOXO3,FYN,FZD1,FZD2,FZD4,GABBR1,GDE1,GNA12,GNAI2,GNAI3,GNAO1,GNAQ,GNB4,GNG10,GNG11,GNG12,GNG5,GPR107,GPR108,GPR39,GPRC5B,GRB2,GRK5,GSK3B,GUCY1A1,GUCY1B1,JUN,LATS1,LATS2,LGR4,LPAR1,MAP2K1,MAP2K4,MAP2K5,MAP3K14,MAP3K2,MAP3K3,MAP3K4,MAP3K5,MAP3K6,Map3k7,MAP3K8,MAPK1,MAPK14,MAPK3,MAPK8…			G-Protein Coupled Receptor Signaling	0	0.107	3.862	ACKR3,ADCY7,ADGRD1,ADGRL1,AKT1,AKT2,AKT3,ATF2,Calm1 (includes others),CAMK2D,CHP1,CREB3L1,CREB3L2,CREB5,CRK,CTNNB1,F2R,FOS,FZD2,FZD4,GDE1,GNA13,GNAS,GNB1,GNB2,GNB4,GNG10,GNG5,GPR39,GSK3B,GUCY1A1,HRAS,JUN,LATS2,LPAR1,MAP2K1,MAP2K2,MAP2K3,MAP3K2,Map3k7,MAPK3,MEF2A,MEF2C,MYL12A,MYL12B,MYL6,MYL9,NFAT5,NFATC3,PAK3,PDE1A,PDE5A,PDE6D,PIK3C2A,PIK3R2,PLCB4,PPP3CB,PPP3R1,PREX2,PRKAR1A,PRKCA,PTGFR,PTK2,PXN,…				G-Protein Coupled Receptor Signaling	0.425	0.178	-4.599	ADCY7,ADGRA2,ADGRD1,AKT1,AKT2,AKT3,ARRB1,ATF2,ATF4,BRAF,Calm1 (includes others),CAMK2D,CHUK,CREB1,CREB3,CREB3L1,CREB3L2,CREB5,CREBBP,CRK,CTNNB1,F2R,FOS,FZD2,FZD4,FZD7,GABBR1,GNA11,GNA12,GNA13,GNAI1,GNAI2,GNAI3,GNAO1,GNAQ,GNAS,GNB4,GNG11,GNG12,GNG5,GPR107,GPR153,GPR180,GPR39,GPRC5B,GRB2,GRK5,GSK3B,GUCY1A1,KRAS,LATS1,LPAR1,MAP2K1,MAP2K3,MAP2K4,MAP2K5,MAP3K14,MAP3K2,MAP3K3,MAP3K4,MAP3K5,MAP3K6,Map3k…
	Cardiac conduction	0.625	0.192	2.132	ABCC9,AHCYL1,ASPH,ATP1A1,ATP2B1,ATP2B4,CACNA1C,CAMK2D,CES1,DMPK,FXYD1,FXYD6,HIPK1,HIPK2,ITPR2,KAT2B,KCNE4,NPR1,NPR2,SCN1B,SCN7A,SLC8A1,STIM1,TRPC1,WWTR1			Cardiac conduction	0.705	0.138	3.357	ABCC9,AHCYL1,ASPH,ATP1A1,ATP1B1,ATP1B3,ATP2B1,CACNA1C,CAMK2D,FXYD6,HIPK1,ITPR1,KAT2B,KCNE4,NPR2,SCN1B,SCN7A,SRI				Cardiac conduction	0	0.169	-2.524	AHCYL1,ASPH,ATP1A2,ATP2A2,ATP2B1,ATP2B4,CAMK2D,FXYD1,FXYD6,HIPK2,ITPR1,ITPR2,KAT2B,KCNE4,NPR2,PRKACA,SCN1B,SCN7A,SLC8A1,SRI,TRPC1,WWTR1
	ERCC6 (CSB) and EHMT2 (G9a) positively regulate rRNA expression	0.582	0.216	2.121	CHD3,CHD4,EHMT2,GATAD2A,GATAD2B,HDAC1,MTA3,RBBP7			ERCC6 (CSB) and EHMT2 (G9a) positively regulate rRNA expression	0.953	0.189	2.646	CBX3,CHD3,HDAC2,MBD3,MTA1,RBBP4,RBBP7				ERCC6 (CSB) and EHMT2 (G9a) positively regulate rRNA expression	0.519	0.216	-2.828	CBX3,CHD3,CHD4,GATAD2A,GATAD2B,HDAC1,MTA3,RBBP7
	cAMP-mediated signaling	0.569	0.182	3.087	ADCY5,AKAP10,AKAP11,AKAP12,AKAP13,AKAP7,AKAP8,BRAF,Calm1 (includes others),CAMK1D,CAMK2D,CREB1,CREB3,CREB3L2,CREB5,CREBBP,CREM,GABBR1,GDE1,GNAI2,GNAI3,GNAO1,GUCY1A1,GUCY1B1,LPAR1,MAP2K1,MAPK1,MAPK3,NPR3,PDE1A,PDE3A,PDE3B,PDE4B,PDE5A,PDE7A,PKIA,PPP3CA,PPP3CB,PRKACB,PTGER4,SMPDL3A,STAT3,TDP2			cAMP-mediated signaling	0.499	0.123	2.449	ADCY7,AKAP11,ATF2,Calm1 (includes others),CAMK1D,CAMK2D,CREB3L1,CREB3L2,CREB5,CREM,GDE1,GNAS,GUCY1A1,LAMTOR3,LPAR1,MAP2K1,MAP2K2,MAPK3,PDE1A,PDE5A,PDE6D,PKIA,PKIG,PPP3CB,PPP3R1,PRKAR1A,RAF1,RAP1A,SMPDL3A				cAMP-mediated signaling	0.793	0.199	-4.003	ADCY7,AKAP10,AKAP11,AKAP12,AKAP7,ATF2,ATF4,BRAF,Calm1 (includes others),CAMK1,CAMK1D,CAMK2D,CREB1,CREB3,CREB3L1,CREB3L2,CREB5,CREBBP,CREM,GABBR1,GNAI1,GNAI2,GNAI3,GNAO1,GNAS,GUCY1A1,LAMTOR3,LPAR1,MAP2K1,MAPK1,PDE12,PDE1A,PDE3A,PDE3B,PDE5A,PDE7A,PDE7B,PKIA,PKIG,PPP3CA,PPP3CB,PRKACA,PRKACB,RAP1A,SMPDL3A,STAT3,TDP2
	NoRC negatively regulates rRNA expression	0.542	0.211	2.121	ARID4B,BAZ2A,HDAC1,MBD2,SAP30L,SIN3A,SIN3B,SMARCA5			NoRC negatively regulates rRNA expression	1.26	0.211	2.828	ARID4B,HDAC2,MBD2,SAP18,SAP30L,SIN3B,SMARCA5,SUDS3				NoRC negatively regulates rRNA expression	0.308	0.184	-2.646	ARID4B,BAZ2A,HDAC1,MBD2,SAP18,SMARCA5,SUDS3
	Methionine Degradation I (to Homocysteine)	0.437	0.208	2.236	AHCYL1,AHCYL2,EHMT1,MAT2B,MGMT			Methionine Degradation I (to Homocysteine)	0.559	0.167	2	AHCYL1,EHMT1,MAT2B,PRMT1				Methionine Degradation I (to Homocysteine)	0.396	0.208	-2.236	AHCYL1,EEF1AKMT1,EHMT1,MAT2A,MGMT
	S100 Family Signaling Pathway	0.405	0.17	5.679	ABCC1,ADAM10,ADGRD1,AHNAK,AKT3,ANXA1,ANXA2,APP,ARNT,BCL2,BCL3,BRAF,CACNA1A,CACNA1C,CACYBP,Calm1 (includes others),CAMK2D,CDKN1A,CHUK,COPS5,CREB1,CREB3,CREB3L2,CREB5,CREBBP,CTSD,DLC1,EDNRA,EGFR,ESR1,FGFR1,FGFR2,FOS,FZD1,FZD2,FZD4,GABBR1,GPR107,GPR108,GPR39,GPRC5B,GSK3B,HIF1A,IL10RB,IL6,IQGAP1,IRAK1,IRAK3,IRF3,ITPR2,JAK1,JUN,LGR4,LPAR1,MAP2K1,MAP2K4,MAP2K5,MAP3K8,MAPK1,MAPK14,MAPK3,MAPK6,MAPK8,MAPK…			S100 Family Signaling Pathway	0	0.109	3.273	ACKR3,ADGRD1,ADGRL1,AKT1,AKT2,AKT3,ANXA1,ANXA2,APP,ATF2,CACNA1A,CACNA1C,Calm1 (includes others),CAMK2D,CDKN1A,CREB3L1,CREB3L2,CREB5,CTNNB1,CTSD,DLC1,ESR1,F2R,FGFR1,FGFR2,FGFRL1,FOS,FZD2,FZD4,GPR39,GSK3B,HBEGF,HIF1A,ILK,IRAK1,ITPR1,JUN,LPAR1,MAP2K1,MAP2K2,MAP2K3,MAPK3,MMP2,MMP23B,MYH9,NOX4,NR3C1,NTF3,PDIA3,PIK3C2A,PIK3R2,PLA2G12A,PLA2G4A,PLAT,PLCB4,PLCL1,PRKAR1A,PRKCA,PTGFR,RAF1,RHOA,ROCK1,ROCK2,S…				S100 Family Signaling Pathway	0	0.166	-5.834	ADAM10,ADGRA2,ADGRD1,AHNAK,AKT1,AKT2,AKT3,ANXA1,APP,ARAF,ARNT,ATF2,ATF4,ATP2A2,BCL2,BCL3,BRAF,BSG,CACNA1A,CACNA2D1,CACYBP,Calm1 (includes others),CAMK2D,CDKN1A,CHUK,COPS5,CREB1,CREB3,CREB3L1,CREB3L2,CREB5,CREBBP,CTNNB1,DLC1,EGFR,ESR1,F2R,FGFR1,FGFR2,FGFRL1,FOS,FZD2,FZD4,FZD7,GABBR1,GNA11,GPR107,GPR153,GPR180,GPR39,GPRC5B,GSK3B,HBEGF,HIF1A,IL10RB,IQGAP1,IRAK1,IRAK3,ITPR1,ITPR2,JAK1,LPAR1,MAP2K1,MA…
	Cysteine Biosynthesis III (mammalia)	0.361	0.192	2.236	AHCYL1,AHCYL2,EHMT1,MAT2B,MGMT			Cysteine Biosynthesis III (mammalia)	0.484	0.154	2	AHCYL1,EHMT1,MAT2B,PRMT1				Cysteine Biosynthesis III (mammalia)	0.323	0.192	-2.236	AHCYL1,EEF1AKMT1,EHMT1,MAT2A,MGMT
	Breast Cancer Regulation by Stathmin1	0.31	0.167	3.128	ADGRD1,ANKHD1/ANKHD1-EIF4EBP3,ARHGEF1,ARHGEF10,ARHGEF11,ARHGEF12,ARHGEF6,CAMK1D,CAMK2D,CCND2,CCND3,CDKN1B,CREB1,CREB3,CREB3L2,CREB5,CREBBP,EDNRA,FGF2,FZD1,FZD2,FZD4,GABBR1,GNAQ,GNB4,GNG10,GNG11,GNG12,GNG5,GPR107,GPR108,GPR39,GPRC5B,GRB2,HIF1A,IGF1,JUN,LGR4,LPAR1,MAP2K1,MAPK1,MAPK3,MMP2,NFKB1,NFKB2,NRAS,PIK3C2A,PIK3CA,PIK3R1,PIK3R2,PLCB1,PLCB4,PPP1CA,PPP1CB,PPP1R7,PPP2CA,PPP2CB,PPP2R2A,PPP2R3A,PPP…			Breast Cancer Regulation by Stathmin1	0	0.109	3.939	ACKR3,ADGRD1,ADGRL1,ARHGEF12,ATF2,CAMK1D,CAMK2D,CCND2,CCND3,CDK4,CREB3L1,CREB3L2,CREB5,F2R,FZD2,FZD4,GNA13,GNB1,GNB2,GNB4,GNG10,GNG5,GPR39,HIF1A,HRAS,JUN,LPAR1,MAP2K1,MAP2K2,MAPK3,MMP2,PIK3C2A,PIK3R2,PLCB4,PPP1CA,PPP1CB,PPP1R10,PPP1R14A,PPP1R14B,PPP2CA,PPP4C,PRKAR1A,PRKCA,PTGFR,RAF1,RALB,RAP1A,RAP1B,RB1CC1,RHOA,RPS6KB1,RRAS,RRAS2,SHC1,TGFB1,TGFB2,TP53,TSG101,TUBA1B,TUBA1C,TUBB2A,TUBB2B,TUBB4B,VEG…				Breast Cancer Regulation by Stathmin1	0	0.172	-4.082	ADGRA2,ADGRD1,ANKHD1/ANKHD1-EIF4EBP3,ARHGEF1,ARHGEF10,ARHGEF11,ARHGEF12,ARHGEF2,ARHGEF6,ATF2,ATF4,CAMK1,CAMK1D,CAMK2D,CCND2,CDK4,CDKN1B,CREB1,CREB3,CREB3L1,CREB3L2,CREB5,CREBBP,F2R,FGF2,FZD2,FZD4,FZD7,GABBR1,GNA13,GNAQ,GNB4,GNG11,GNG12,GNG5,GPR107,GPR153,GPR180,GPR39,GPRC5B,GRB2,HIF1A,KRAS,LPAR1,MAP2K1,MAPK1,MMP2,NFKB1,NFKB2,NRAS,PIK3C2A,PIK3CA,PLCB1,PPP1CA,PPP1CB,PPP1R10,PPP1R11,PPP1R12A,PPP1R7,…
	HDR through Homologous Recombination (HRR) or Single Strand Annealing (SSA)	0.306	0.17	2.524	ABL1,BABAM1,BABAM2,HERC2,PCNA,POLD4,PPP4R2,RAD50,RAD51B,RBBP8,RFC1,RNF4,SEM1,SPIDR,SUMO2,UBC,UBE2V2,UIMC1,WRN			HDR through Homologous Recombination (HRR) or Single Strand Annealing (SSA)	0.578	0.134	3.357	ABL1,ERCC1,HERC2,PCNA,POLD4,PPP4C,PPP4R2,RPS27A,SUMO2,TIPIN,UBC,UBE2I,UBE2N,UBE2V2,UIMC1				HDR through Homologous Recombination (HRR) or Single Strand Annealing (SSA)	0.539	0.196	-2.985	ABL1,BABAM1,BABAM2,PCNA,POLD4,POLE3,POLE4,PPP4R2,RAD50,RAD51B,RBBP8,RFC1,RNF4,RPA3,SEM1,SPIDR,UBC,UBE2I,UBE2N,UBE2V2,UIMC1,WRN
	Transport of bile salts and organic acids, metal ions and amine compounds	0.287	0.169	3.207	CP,RUNX1,SLC10A6,SLC16A7,SLC2A13,SLC30A5,SLC31A1,SLC39A14,SLC39A7,SLC41A2,SLC44A1,SLC44A2,SLC5A3,SLC6A6			Transport of bile salts and organic acids, metal ions and amine compounds	0	0.0723	2.449	SLC10A6,SLC31A1,SLC39A7,SLC44A2,SLC5A3,SLC6A6				Transport of bile salts and organic acids, metal ions and amine compounds	0.329	0.181	-2.84	BSG,RUNX1,SLC10A6,SLC16A7,SLC30A5,SLC31A1,SLC39A1,SLC39A10,SLC39A14,SLC39A7,SLC41A1,SLC41A2,SLC44A1,SLC44A2,SLC5A3
	Phagosome Formation	0	0.148	6.799	ACTR3,ADGRD1,AKT3,AP1G1,AP1S2,APBB1IP,ARPC1B,ARPC2,ARPC5,C3,CFL2,CLIP1,COLEC12,CRKL,DIAPH1,DOCK1,EDNRA,ELMO1,ELMO2,FN1,FYN,FZD1,FZD2,FZD4,GAB2,GABBR1,GPR107,GPR108,GPR39,GPRC5B,GRB2,HMOX1,ITGA1,ITGA5,ITGA9,ITGAV,ITGB1,ITGB5,ITGB8,ITPR2,LBP,LGR4,LPAR1,MAP2K1,MAP2K4,MAP2K5,MAPK1,MAPK3,MAPK6,MYD88,MYH11,MYH9,MYL6,MYL9,MYO10,MYO18A,NRAS,OCRL,PAK2,PAK3,PI4KA,PIK3C2A,PIK3CA,PIK3R1,PIK3R2,PIKFYVE,PIP4K2…			Phagosome Formation	0	0.101	6.621	ACKR3,ACTR2,ACTR3,ADGRD1,ADGRL1,AKT1,AKT2,AKT3,AP1S1,AP1S2,APBB1IP,ARFIP2,ARPC1B,ARPC2,ARPC3,ARPC4,ARPC5,ARPC5L,CFL1,CFL2,CLIP1,F2R,FN1,FZD2,FZD4,GAB2,GPR39,HRAS,ITGA8,ITGAV,ITGB1,ITGB5,ITPR1,LBP,LPAR1,MAP2K1,MAP2K2,MAP2K3,MAPK3,MYH11,MYH9,MYL12A,MYL12B,MYL6,MYL9,PAK3,PIK3C2A,PIK3R2,PLA2G12A,PLA2G4A,PNPLA2,PNPLA8,PRDX6,PRKCA,PTGFR,PTK2,RAF1,RALB,RAP1A,RAP1B,RHOA,ROCK1,ROCK2,RPS6KB1,RRAS,RRAS2,SCA…				Phagosome Formation	0	0.149	-5.883	ACTR3,ADGRA2,ADGRD1,AKT1,AKT2,AKT3,AP1G1,AP1S1,APBB1IP,ARFIP2,ARPC1B,ARPC2,ARPC4,ARPC5,BCL10,C3,CFL1,CLIP1,COLEC12,CRKL,DIAPH1,DOCK1,ELMO1,ELMO2,F2R,FZD2,FZD4,FZD7,GAB2,GABBR1,GPR107,GPR153,GPR180,GPR39,GPRC5B,GRB2,HMOX1,ITGA1,ITGA9,ITGAV,ITGB1,ITGB5,ITGB8,ITPR1,ITPR2,KRAS,LBP,LPAR1,MAP2K1,MAP2K3,MAP2K4,MAP2K5,MAPK1,MAPK6,MRC2,MYH10,MYH11,MYH9,MYL9,MYO10,MYO18A,NRAS,OCRL,PAK2,PAK3,PI4KA,PIK3C2A,P…
	FAK Signaling	0	0.118	5.975	ACTR3,ACVR2A,ADGRD1,AGO2,AKT3,APC,ARHGAP35,ARHGEF6,ARPC1B,ARPC2,ARPC5,ASAP1,BMPR2,CAPN2,CAPN7,CAPNS1,COL1A1,CRK,CRKL,DOCK1,EDNRA,EFNA5,EGFR,ELF1,ELF2,ELF4,ELK3,ETS2,FLT1,FOS,FYN,FZD1,FZD2,FZD4,GABBR1,GHR,GIT2,GPR107,GPR108,GPR39,GPRC5B,GRB2,GSK3B,IFNAR1,IGF1R,IL10RB,IL13RA1,IL17RA,IL1R1,IL31RA,IL33,IL3RA,IL6R,IL6ST,ITGA1,ITGA5,ITGA9,ITGAV,ITGB1,ITGB5,ITGB8,JUN,LGR4,LPAR1,MAP2K1,MAP2K4,MAP2K5,MAPK…			FAK Signaling	0	0.0803	3.842	ACKR3,ACTR2,ACTR3,ACVR1,ADGRD1,ADGRL1,AGO2,AKT1,AKT2,AKT3,APC,ARPC1B,ARPC2,ARPC3,ARPC4,ARPC5,ARPC5L,ASAP1,BAD,BMPR2,CAPNS1,COL1A1,COL1A2,CRK,CSK,CTNNB1,ECM1,ELF1,ELK3,F2R,FLT1,FOS,FZD2,FZD4,GHR,GPR39,GSK3B,HRAS,IL11RA,IL13RA1,IL1R1,IL33,IL6ST,ITGA8,ITGAV,ITGB1,ITGB5,JUN,LPAR1,MAP2K1,MAP2K2,MAPK3,MMP2,NCK1,PAK3,PDGFRA,PIK3C2A,PIK3R2,PTEN,PTGFR,PTK2,PTPN12,PXN,RAF1,RALB,RAP1A,RAP1B,RASA1,RB1CC1,RHO…				FAK Signaling	0	0.12	-6.466	ACTR3,ACVR1,ACVR2A,ADGRA2,ADGRD1,AGO2,AKT1,AKT2,AKT3,APC,ARHGAP35,ARHGEF6,ARPC1B,ARPC2,ARPC4,ARPC5,ASAP1,BMPR2,CAPN7,CAPNS1,COL1A1,COL1A2,CRK,CRKL,CTNNB1,DOCK1,ECM1,ECM2,EFNA5,EGFR,ELF1,ELF2,ELF4,ELK3,ETS1,ETS2,F2R,FLT1,FOS,FZD2,FZD4,FZD7,GABBR1,GHR,GIT2,GPR107,GPR153,GPR180,GPR39,GPRC5B,GRB2,GSK3B,IFNAR1,IGF1R,IL10RB,IL11RA,IL13RA1,IL17RA,IL1R1,IL31RA,IL33,IL3RA,IL6R,IL6ST,ITGA1,ITGA9,ITGAV,ITGB…
	Generic Transcription Pathway	0	0.112	5.196	CDK8,CREBBP,ESR1,ESRRG,HDAC1,HDAC3,HDAC5,HDAC7,HDAC8,HDAC9,KAT2B,MAML1,MAML3,MED13,MED14,MED15,MED31,MED6,NCOR1,NR1D1,NR1D2,NR2C2,NR3C1,NR3C2,NR4A1,NR4A2,NR6A1,NRBF2,NRBP1,RARA,RARG,RBPJ,RORA,RXRA,SNW1,TBL1X,TBL1XR1,THRB,ZKSCAN1,ZNF25,ZNF266,ZNF354C,ZNF442,ZNF445,ZNF655,ZNF664,ZNF703,ZNF704			Generic Transcription Pathway	0	0.0607	4.315	AR,CCNC,CDK8,ESR1,HDAC2,KAT2B,MED10,MED13,MED14,MED25,MED30,MED31,MED6,NR1D1,NR1D2,NR1H2,NR2F6,NR3C1,NR4A1,RARG,TBL1XR1,THRB,ZNF560,ZNF664,ZNF706,ZNF771				Generic Transcription Pathway	0	0.129	-5.528	AR,CCNC,CDK8,CREBBP,ESR1,ESRRG,HDAC1,HDAC3,HDAC4,HDAC5,HDAC7,HDAC8,KAT2B,MAML1,MAML3,MED1,MED10,MED13,MED14,MED6,MED8,NCOR1,NCOR2,NOTCH2,NR1D1,NR1D2,NR1H2,NR2C2,NR3C1,NR3C2,NR4A2,NR4A3,NR6A1,NRBP1,RARA,RARG,RBPJ,RORA,RXRA,SNW1,TBL1X,TBL1XR1,THRA,THRB,TRIM28,ZKSCAN1,ZKSCAN3,ZNF25,ZNF266,ZNF354C,ZNF445,ZNF655,ZNF664,ZNF703,ZNF704
	CREB Signaling in Neurons	0	0.153	5.128	ADCY5,ADGRD1,AKT3,BMPR1A,BMPR2,CACNA1A,CACNA1C,Calm1 (includes others),CAMK2D,CREB1,CREB3,CREB3L2,CREB5,CREBBP,EDNRA,EGFR,EP300,FGF2,FGFR1,FGFR2,FLT1,FZD1,FZD2,FZD4,GABBR1,GHR,GNA12,GNAI2,GNAI3,GNAO1,GNAQ,GNB4,GNG10,GNG11,GNG12,GNG5,GPR107,GPR108,GPR39,GPRC5B,GRB2,GRIA4,GRIK1,GUCY1A1,GUCY1B1,IGF1,IGF1R,INSR,ITPR2,LGR4,LPAR1,MAP2K1,MAPK1,MAPK3,NRAS,NTRK2,NTRK3,PDGFRA,PDGFRB,PDIA3,PIK3C2A,PIK3CA,PI…			CREB Signaling in Neurons	0.346	0.114	4.901	ACKR3,ADCY7,ADGRD1,ADGRL1,AKT1,AKT2,AKT3,ATF2,BMPR1A,BMPR2,CACNA1A,CACNA1C,Calm1 (includes others),CAMK2D,CREB3L1,CREB3L2,CREB5,EP300,F2R,FGFR1,FGFR2,FLT1,FZD2,FZD4,GHR,GNA13,GNAS,GNB1,GNB2,GNB4,GNG10,GNG5,GPR39,GRIA4,GTF2B,GUCY1A1,HRAS,ITPR1,LPAR1,MAP2K1,MAP2K2,MAPK3,PDGFRA,PDIA3,PIK3C2A,PIK3R2,PLCB4,PLCL1,POLR2A,POLR2C,POLR2F,POLR2G,POLR2H,POLR2J,POLR2K,PRKAR1A,PRKCA,PTGFR,RAF1,RALB,RAP1A,RAP1B…				CREB Signaling in Neurons	0	0.161	-5.738	ADCY7,ADGRA2,ADGRD1,AKT1,AKT2,AKT3,ATF2,ATF4,BMPR1A,BMPR2,CACNA1A,CACNA2D1,Calm1 (includes others),CAMK2D,CREB1,CREB3,CREB3L1,CREB3L2,CREB5,CREBBP,EGFR,EP300,F2R,FGF2,FGFR1,FGFR2,FLT1,FZD2,FZD4,FZD7,GABBR1,GHR,GNA11,GNA12,GNA13,GNAI1,GNAI2,GNAI3,GNAO1,GNAQ,GNAS,GNB4,GNG11,GNG12,GNG5,GPR107,GPR153,GPR180,GPR39,GPRC5B,GRB2,GRIA3,GRIA4,GRIK1,GTF2B,GUCY1A1,IGF1R,IGF2R,INSR,ITPR1,ITPR2,KRAS,LPAR1,MAP2…
	B Cell Receptor Signaling	0	0.104	4.826	ABL1,AKT3,APBB1IP,BCL2L1,BCL6,Calm1 (includes others),CAMK2D,CFL2,CHUK,CREB1,CREB3,CREB3L2,CREB5,CREBBP,EBF1,EGR1,FOXO1,GAB1,GAB2,GRB2,GSK3B,JUN,MAP2K1,MAP2K4,MAP3K14,MAP3K2,MAP3K3,MAP3K4,MAP3K5,MAP3K6,Map3k7,MAP3K8,MAPK1,MAPK14,MAPK3,MAPK8,MAPK9,NFAT5,NFATC1,NFKB1,NFKB2,NFKBIA,NFKBIB,NRAS,OCRL,PDPK1,PIK3C2A,PIK3CA,PIK3R1,PIK3R2,PPP3CA,PPP3CB,PTK2,PTPN11,RALB,RAP1B,RAP2A,RAP2B,RELB,RPS6KB1,RRAS2,…			B Cell Receptor Signaling	0	0.0726	3.618	ABL1,AKT1,AKT2,AKT3,APBB1IP,ATF2,BAD,BCL2L1,BCL6,Calm1 (includes others),CAMK2D,CFL1,CFL2,CREB3L1,CREB3L2,CREB5,CSK,EGR1,GAB2,GSK3B,HRAS,JUN,MAP2K1,MAP2K2,MAP2K3,MAP3K2,Map3k7,MAPK3,MEF2C,NFAT5,NFATC3,PIK3C2A,PIK3R2,PPP3CB,PPP3R1,PTEN,PTK2,PTPN11,RAF1,RALB,RAP1A,RAP1B,RPS6KB1,RRAS,RRAS2,SHC1				B Cell Receptor Signaling	0	0.112	-3.349	ABL1,AKT1,AKT2,AKT3,APBB1IP,ATF2,ATF4,BCL10,BCL6,Calm1 (includes others),CAMK2D,CFL1,CHUK,CREB1,CREB3,CREB3L1,CREB3L2,CREB5,CREBBP,EBF1,ETS1,GAB1,GAB2,GRB2,GSK3B,KRAS,MAP2K1,MAP2K3,MAP2K4,MAP3K14,MAP3K2,MAP3K3,MAP3K4,MAP3K5,MAP3K6,Map3k7,MAPK1,MAPK14,MAPK8,MEF2C,NFAT5,NFATC1,NFKB1,NFKB2,NRAS,OCRL,PDPK1,PIK3C2A,PIK3CA,PPP3CA,PPP3CB,PTK2,PTPN11,RAC1,RALA,RALB,RAP1A,RAP1B,RAP2A,RAP2B,REL,RELA,RELB,R…
	PKCŒ∏ Signaling in T Lymphocytes	0	0.0789	4.323	CACNA1A,CACNA1C,CAMK2D,CHP1,CHUK,FOS,FYN,GRB2,HLA-A,ITPR2,JUN,MAP2K4,MAP3K14,MAP3K2,MAP3K3,MAP3K4,MAP3K5,MAP3K6,Map3k7,MAP3K8,MAPK1,MAPK3,MAPK8,NFAT5,NFATC1,NFKB1,NFKB2,NFKBIA,NFKBIB,NRAS,PIK3C2A,PIK3CA,PIK3R1,PIK3R2,POU2F1,PPP3CA,PPP3CB,RALB,RAP1B,RAP2A,RAP2B,RELB,RRAS2,SOS2			PKCŒ∏ Signaling in T Lymphocytes	0	0.0412	3.578	CACNA1A,CACNA1C,CAMK2D,CHP1,FOS,HLA-A,HRAS,ITPR1,JUN,MAP3K2,Map3k7,MAPK3,NFAT5,NFATC3,PIK3C2A,PIK3R2,PPP3CB,PPP3R1,RALB,RAP1A,RAP1B,RRAS,RRAS2				PKCŒ∏ Signaling in T Lymphocytes	0	0.0806	-2.92	BCL10,CACNA1A,CACNA2D1,CAMK2D,CHUK,FOS,GRB2,HLA-A,ITPR1,ITPR2,KRAS,MAP2K4,MAP3K14,MAP3K2,MAP3K3,MAP3K4,MAP3K5,MAP3K6,Map3k7,MAPK1,MAPK8,NFAT5,NFATC1,NFKB1,NFKB2,NRAS,PIK3C2A,PIK3CA,POU2F1,PPP3CA,PPP3CB,RAC1,RALA,RALB,RAP1A,RAP1B,RAP2A,RAP2B,REL,RELA,RELB,RRAS2,SOS1,SOS2,VAV3
	Role of NFAT in Regulation of the Immune Response	0	0.058	4.128	AKT3,CABIN1,Calm1 (includes others),CHP1,CHUK,CSNK1A1,CSNK1D,CSNK1E,CSNK1G1,CSNK1G3,FOS,FYN,GNA12,GNAI2,GNAI3,GNAO1,GNAQ,GNB4,GNG10,GNG11,GNG12,GNG5,GRB2,GSK3B,HLA-A,IPO5,ITPR2,JUN,KPNA3,KPNA4,KPNB1,MAP2K1,MAPK1,MAPK3,MEF2A,MEF2D,NFAT5,NFATC1,NFKB1,NFKB2,NFKBIA,NFKBIB,NRAS,PIK3C2A,PIK3CA,PIK3R1,PIK3R2,PLCB1,PLCB4,PPP3CA,PPP3CB,RALB,RAP1B,RAP2A,RAP2B,RCAN2,RELB,RRAS2,SOS2,TNPO1			Role of NFAT in Regulation of the Immune Response	0	0.0426	2.744	AKT1,AKT2,AKT3,ATF2,Calm1 (includes others),CHP1,CSNK1A1,CSNK1E,FOS,GNA13,GNAS,GNB1,GNB2,GNB4,GNG10,GNG5,GSK3B,HLA-A,HRAS,IPO5,ITPR1,JUN,KPNA1,KPNA3,MAP2K1,MAP2K2,MAPK3,MEF2A,MEF2C,NFAT5,NFATC3,PIK3C2A,PIK3R2,PLCB4,PPP3CB,PPP3R1,RAF1,RALB,RAP1A,RAP1B,RCAN2,RRAS,RRAS2,TNPO1				Role of NFAT in Regulation of the Immune Response	0	0.0638	-4.16	AKT1,AKT2,AKT3,ATF2,CABIN1,Calm1 (includes others),CHUK,CSNK1A1,CSNK1D,CSNK1E,CSNK1G1,CSNK1G2,CSNK1G3,FOS,GNA11,GNA12,GNA13,GNAI1,GNAI2,GNAI3,GNAO1,GNAQ,GNAS,GNB4,GNG11,GNG12,GNG5,GRB2,GSK3B,HLA-A,IPO5,ITPR1,ITPR2,KPNA1,KPNA4,KPNB1,KRAS,MAP2K1,MAPK1,MEF2A,MEF2C,MEF2D,NFAT5,NFATC1,NFKB1,NFKB2,NRAS,PIK3C2A,PIK3CA,PLCB1,PPP3CA,PPP3CB,RALA,RALB,RAP1A,RAP1B,RAP2A,RAP2B,REL,RELA,RELB,RRAS2,SOS1,SOS2,TN…
	Phospholipase C Signaling	0	0.0768	4.032	ADCY5,AHNAK,ARHGEF1,ARHGEF10,ARHGEF11,ARHGEF12,ARHGEF6,Calm1 (includes others),Cdc42,CHP1,CREB1,CREB3,CREB3L2,CREB5,CREBBP,EP300,FNBP1,FYN,GNAQ,GNB4,GNG10,GNG11,GNG12,GNG5,GRB2,GUCY1A1,GUCY1B1,HDAC1,HDAC3,HDAC5,HDAC7,HDAC8,HDAC9,HMOX1,ITGA1,ITGA5,ITGA9,ITGAV,ITGB1,ITGB5,ITGB8,ITPR2,MAP2K1,MAPK1,MAPK3,MEF2A,MEF2D,MPRIP,MYL6,MYL9,NFAT5,NFATC1,NFKB1,NFKB2,NRAS,PEBP1,PLA2G12A,PLCB1,PLCB4,PLCE1,PLD1,P…			Phospholipase C Signaling	0	0.0509	4.117	ADCY7,ARHGEF12,ATF2,Calm1 (includes others),CHP1,CREB3L1,CREB3L2,CREB5,EP300,GNA13,GNAS,GNB1,GNB2,GNB4,GNG10,GNG5,GUCY1A1,HDAC2,HRAS,ITGA8,ITGAV,ITGB1,ITGB5,ITPR1,MAP2K1,MAP2K2,MAPK3,MEF2A,MEF2C,MYL12A,MYL12B,MYL6,MYL9,NFAT5,NFATC3,PEBP1,PLA2G12A,PLA2G4A,PLCB4,PPP1CB,PPP1R14A,PPP3CB,PPP3R1,PRKCA,RAF1,RALB,RAP1A,RAP1B,RHOA,RHOBTB1,RHOC,RHOJ,RHOQ,RND3,RRAS,RRAS2,SHC1				Phospholipase C Signaling	0	0.0786	-4.064	ADCY7,AHNAK,ARHGEF1,ARHGEF10,ARHGEF11,ARHGEF12,ARHGEF2,ARHGEF6,ATF2,ATF4,Calm1 (includes others),CREB1,CREB3,CREB3L1,CREB3L2,CREB5,CREBBP,EP300,FNBP1,GNA13,GNAQ,GNAS,GNB4,GNG11,GNG12,GNG5,GRB2,GUCY1A1,HDAC1,HDAC3,HDAC4,HDAC5,HDAC7,HDAC8,HMOX1,ITGA1,ITGA9,ITGAV,ITGB1,ITGB5,ITGB8,ITPR1,ITPR2,KRAS,MAP2K1,MAPK1,MEF2A,MEF2C,MEF2D,MPRIP,MYL9,NFAT5,NFATC1,NFKB1,NFKB2,NRAS,PEBP1,PLCB1,PLCE1,PPP1CB,PPP1R1…
	NF-Œ∫B Signaling	0	0.116	4	AKT3,AZI2,BMP4,BMPR1A,BMPR2,BRAF,BTRC,CHUK,CREBBP,CSNK2A1,CSNK2A2,EGFR,EP300,FGFR1,FGFR2,FLT1,GHR,GSK3B,HDAC1,IGF1R,IL1R1,IL33,INSR,IRAK1,IRAK3,LTBR,MAP3K14,MAP3K3,MAP3K8,MAP4K4,MAPK8,MYD88,NFKB1,NFKB2,NFKBIA,NFKBIB,NGF,NRAS,NTRK2,NTRK3,PDGFRA,PDGFRB,PELI1,PIK3C2A,PIK3CA,PIK3R1,PIK3R2,PRKACB,RALB,RAP1B,RAP2A,RAP2B,RELB,RRAS2,TAB2,TANK,TBK1,TDP2,TGFBR2,TGFBR3,TLR4,TNFAIP3,TNFRSF1A,TNFSF13B,TNIP1,T…			NF-Œ∫B Signaling	0	0.0665	3.893	AKT1,AKT2,AKT3,AZI2,BMPR1A,BMPR2,CSNK2A1,CSNK2B,EP300,FGFR1,FGFR2,FLT1,GHR,GSK3B,HDAC2,HRAS,IL1R1,IL33,IRAK1,LTBR,PDGFRA,PIK3C2A,PIK3R2,RAF1,RALB,RAP1A,RAP1B,RRAS,RRAS2,TGFBR1,TGFBR3,TLR4,TNFRSF11B,TNFRSF1A,TNFSF13B,TRAF5,UBE2N,UBE2V1				NF-Œ∫B Signaling	0	0.116	-4.5	AKT1,AKT2,AKT3,ARAF,BCL10,BMP4,BMPR1A,BMPR2,BRAF,BTRC,CHUK,CREBBP,CSNK2A1,CSNK2A2,EGFR,EP300,FGFR1,FGFR2,FLT1,GHR,GSK3B,HDAC1,IGF1R,IGF2R,IL1R1,IL33,INSR,IRAK1,IRAK3,KRAS,LTBR,MAP3K14,MAP3K3,MAP4K4,MAPK8,NFKB1,NFKB2,NGF,NRAS,NTRK2,PDGFRB,PIK3C2A,PIK3CA,PRKACA,PRKACB,RALA,RALB,RAP1A,RAP1B,RAP2A,RAP2B,RELA,RELB,RRAS2,TAB2,TANK,TBK1,TDP2,TGFBR2,TLR4,TNFRSF1A,TNFSF13B,TNIP1,TRAF3,UBE2N,UBE2V1
	Transport of inorganic cations/anions and amino acids/oligopeptides	0	0.154	4	AHCYL2,SLC12A6,SLC1A3,SLC1A5,SLC20A2,SLC36A4,SLC38A2,SLC3A2,SLC4A4,SLC4A7,SLC6A6,SLC7A2,SLC7A6,SLC8A1,SLC8B1,SLC9A1			Transport of inorganic cations/anions and amino acids/oligopeptides	0	0.0865	2.333	SLC12A4,SLC24A3,SLC36A4,SLC38A2,SLC6A6,SLC7A2,SLC7A6,SLC8B1,SRI				Transport of inorganic cations/anions and amino acids/oligopeptides	0	0.163	-2.668	SLC12A2,SLC12A6,SLC16A10,SLC1A3,SLC1A5,SLC20A2,SLC24A3,SLC3A2,SLC4A2,SLC4A4,SLC4A7,SLC7A1,SLC7A2,SLC8A1,SLC8B1,SLC9A1,SRI
	Cell surface interactions at the vascular wall	0	0.133	3.78	ANGPT2,CD47,CD99L2,COL1A1,FN1,FYN,GAS6,GLG1,GRB14,GRB2,ITGA5,ITGAV,ITGB1,NRAS,PIK3CA,PIK3R1,PIK3R2,PPIA,PPIL2,PROS1,PTPN11,SDC4,SHC1,SIRPA,SLC3A2,SLC7A6,THBD,YES1			Cell surface interactions at the vascular wall	0.309	0.114	3.674	ANGPT2,ATP1B1,ATP1B3,CAV1,CD47,COL1A1,COL1A2,FN1,GAS6,HRAS,ITGAV,ITGB1,JAM2,MIF,PIK3R2,PPIA,PPIL2,PROS1,PTPN11,SDC4,SHC1,SIRPA,SLC7A6,TGFB1				Cell surface interactions at the vascular wall	0	0.142	-3.286	ANGPT1,ANGPT2,BSG,CD44,CD99L2,COL1A1,COL1A2,GAS6,GLG1,GRB14,GRB2,ITGAV,ITGB1,JAM2,JAM3,KRAS,NRAS,PIK3CA,PPIA,PPIL2,PROS1,PTPN11,SDC2,SDC3,SHC1,SIRPA,SLC3A2,SOS1,THBD,YES1
	Systemic Lupus Erythematosus in B Cell Signaling Pathway	0	0.107	3.671	AKT3,BCL2,BCL2L1,BCL2L11,Calm1 (includes others),CCND2,CCND3,CHP1,Eda,FOS,FOXO1,FOXO3,FYN,GAB1,GRB2,GSK3B,IFIT2,IFNAR1,IFNGR1,IFNGR2,IL17D,IL33,IL6,IL6R,IL6ST,IRAK1,IRF3,IRF9,ISG15,ISG20,JAK1,JAK2,JUN,MAP2K1,MAP3K14,MAP4K4,MAPK1,MAPK3,MCL1,MYC,MYD88,NFAT5,NFATC1,NFKB1,NFKB2,NRAS,OCRL,PDPK1,PIK3C2A,PIK3CA,PIK3R1,PIK3R2,PPP3CA,PPP3CB,PRKCA,PRKCE,PRKCI,PRKD1,PRKD3,PTPN11,RALB,RAP1B,RAP2A,RAP2B,RELB,…			Systemic Lupus Erythematosus in B Cell Signaling Pathway	0	0.0622	2.534	AKT1,AKT2,AKT3,BAD,BCL2L1,Calm1 (includes others),CCND2,CCND3,CHP1,CSK,CTNNB1,FOS,GSK3B,HRAS,IFNAR2,IFNGR2,IL33,IL6ST,IRAK1,JUN,MAP2K1,MAP2K2,MAPK3,NFAT5,NFATC3,PIK3C2A,PIK3R2,PPP3CB,PPP3R1,PRKCA,PTPN11,RAF1,RALB,RAP1A,RAP1B,RASGRP2,RRAS,RRAS2,SHC1,TGFB1,TGFB2,TGFB3,TNFSF12,TNFSF13B,TRAF5				Systemic Lupus Erythematosus in B Cell Signaling Pathway	0	0.0982	-4.214	AKT1,AKT2,AKT3,BCL10,BCL2,BCL2L11,Calm1 (includes others),CBL,CCND2,CTNNB1,Eda,FOS,GAB1,GRB2,GSK3B,IFIT2,IFNAR1,IFNAR2,IFNGR2,IL33,IL6R,IL6ST,IRAK1,ISG20,JAK1,JAK2,KRAS,MAP2K1,MAP3K14,MAP4K4,MAPK1,MCL1,NFAT5,NFATC1,NFKB1,NFKB2,NRAS,OCRL,PDPK1,PIK3C2A,PIK3CA,PPP3CA,PPP3CB,PRKCA,PRKCE,PRKCI,PTPN11,RAC1,RALA,RALB,RAP1A,RAP1B,RAP2A,RAP2B,REL,RELA,RELB,RRAS2,SHC1,SHC2,SOS1,SOS2,STAT2,STAT3,SYNJ2,TBK1,…
	PI3K Signaling in B Lymphocytes	0	0.0866	3.317	ABL1,AKT3,ATF1,ATF3,ATF6,ATF7,C3,Calm1 (includes others),CAMK2D,CD81,CHP1,CHUK,CREB1,FOS,FOXO3,FYN,IRS2,ITPR2,JUN,MAP2K1,MAPK1,MAPK3,NFAT5,NFATC1,NFKB1,NFKB2,NFKBIA,NFKBIB,NRAS,PDIA3,PDPK1,PIK3CA,PIK3R1,PIK3R2,PLCB1,PLCB4,PLCE1,PLCL1,PLEKHA1,PLEKHA2,PLEKHA4,PPP3CA,PPP3CB,PRKCI,RALB,RAP1B,RAP2A,RAP2B,RELB,RRAS2,TLR4			PI3K Signaling in B Lymphocytes	0	0.0628	2.197	ABL1,AKT1,AKT2,AKT3,ATF1,ATF2,ATF3,ATF5,ATF6,Calm1 (includes others),CAMK2D,CD81,CHP1,FOS,HRAS,ITPR1,JUN,MAP2K1,MAP2K2,MAPK3,NFAT5,NFATC3,PDIA3,PIK3R2,PLCB4,PLCL1,PLEKHA3,PPP3CB,PPP3R1,PTEN,RAF1,RALB,RAP1A,RAP1B,RRAS,RRAS2,TLR4				PI3K Signaling in B Lymphocytes	0	0.09	-3.464	ABL1,AKT1,AKT2,AKT3,ATF1,ATF2,ATF4,ATF5,ATF6,ATF7,BCL10,C3,Calm1 (includes others),CAMK2D,CBL,CHUK,CREB1,FOS,IRS1,IRS2,ITPR1,ITPR2,KRAS,MAP2K1,MAPK1,NFAT5,NFATC1,NFKB1,NFKB2,NRAS,PDIA3,PDPK1,PIK3CA,PLCB1,PLCE1,PLCL1,PLEKHA4,PPP3CA,PPP3CB,PRKCI,RAC1,RALA,RALB,RAP1A,RAP1B,RAP2A,RAP2B,REL,RELA,RELB,RRAS2,TLR4,VAV3
	p70S6K Signaling	0	0.0846	3.317	AKT3,BCAP31,EEF2,EEF2K,EGFR,GNAI2,GNAI3,GNAQ,GRB2,JAK1,MAP2K1,MAPK1,MAPK3,NRAS,PDIA3,PDPK1,PIK3C2A,PIK3CA,PIK3R1,PIK3R2,PLCB1,PLCB4,PLCE1,PLCL1,PLD1,PPP2CA,PPP2CB,PPP2R2A,PPP2R2D,PPP2R3A,PPP2R5A,PPP2R5E,PRKCA,PRKCE,PRKCI,PRKD1,PRKD3,RALB,RAP1B,RAP2A,RAP2B,RPS6,RPS6KB1,RRAS2,SHC1,SOS2,YWHAB,YWHAE,YWHAG			p70S6K Signaling	0	0.0518	2.353	AKT1,AKT2,AKT3,BAD,EEF2K,F2R,HRAS,MAP2K1,MAP2K2,MAPK3,PDIA3,PIK3C2A,PIK3R2,PLCB4,PLCL1,PPP2CA,PRKCA,RAF1,RALB,RAP1A,RAP1B,RPS6,RPS6KB1,RRAS,RRAS2,SHC1,YWHAE,YWHAH,YWHAQ,YWHAZ				p70S6K Signaling	0	0.0915	-2.771	AKT1,AKT2,AKT3,EEF2,EEF2K,EGFR,F2R,GNAI1,GNAI2,GNAI3,GNAQ,GRB2,IRS1,JAK1,KRAS,MAP2K1,MAPK1,NRAS,PDIA3,PDPK1,PIK3C2A,PIK3CA,PLCB1,PLCE1,PLCL1,PPP2CA,PPP2CB,PPP2R1A,PPP2R2A,PPP2R2D,PPP2R3A,PPP2R5A,PPP2R5E,PRKCA,PRKCE,PRKCI,PTPA,RALA,RALB,RAP1A,RAP1B,RAP2A,RAP2B,RPS6,RPS6KB1,RRAS2,SHC1,SOS1,SOS2,YWHAB,YWHAE,YWHAG,YWHAQ
	SAPK/JNK Signaling	0	0.0717	3.307	CRK,CRKL,GAB1,GNA12,GNB4,GNG10,GNG11,GNG12,GNG5,GRB2,HNRNPK,JUN,MAP2K4,MAP3K2,MAP3K3,MAP3K4,MAP3K5,MAP4K3,MAP4K4,MAP4K5,MAPK8,MAPK9,NFATC1,NRAS,PIK3C2A,PIK3CA,PIK3R1,PIK3R2,RALB,RAP1B,RAP2A,RAP2B,RRAS2,SHC1,SOS2,TP53			SAPK/JNK Signaling	0	0.0478	2.4	ATF2,CRK,GNA13,GNB1,GNB2,GNB4,GNG10,GNG5,HNRNPK,HRAS,JUN,MAP3K2,MAP3K20,MAP4K5,NFATC3,PIK3C2A,PIK3R2,RALB,RAP1A,RAP1B,RRAS,RRAS2,SHC1,TP53				SAPK/JNK Signaling	0	0.0837	-3.042	ATF2,CRK,CRKL,DUSP8,GAB1,GADD45A,GNA12,GNA13,GNB4,GNG11,GNG12,GNG5,GRB2,IRS1,KRAS,MAP2K4,MAP3K2,MAP3K20,MAP3K3,MAP3K4,MAP3K5,MAP4K3,MAP4K4,MAP4K5,MAPK8,MAPK8IP3,NFATC1,NRAS,PIK3C2A,PIK3CA,RAC1,RALA,RALB,RAP1A,RAP1B,RAP2A,RAP2B,RRAS2,SHC1,SOS1,SOS2,TP53
	IL-15 Signaling	0	0.0532	3.272	AKT1S1,AKT3,BCL2L1,JAK1,JAK2,MAP2K1,MAPK1,MAPK14,MAPK3,MYC,NFKB1,NFKB2,NRAS,PIK3C2A,PIK3CA,PIK3R1,PIK3R2,RALB,RAP1B,RAP2A,RAP2B,RELB,RPS6KB1,RRAS2,SHC1,STAT3,STAT5B,STAT6			IL-15 Signaling	0	0.0361	3.441	AKT1,AKT2,AKT3,BCL2L1,HRAS,MAP2K1,MAP2K2,MAPK3,PIK3C2A,PIK3R2,RAF1,RALB,RAP1A,RAP1B,RPS6KB1,RRAS,RRAS2,SHC1,STAT6				IL-15 Signaling	0	0.057	-3.402	AKT1,AKT1S1,AKT2,AKT3,JAK1,JAK2,KRAS,MAP2K1,MAPK1,MAPK14,NFKB1,NFKB2,NRAS,PIK3C2A,PIK3CA,RALA,RALB,RAP1A,RAP1B,RAP2A,RAP2B,REL,RELA,RELB,RPS6KB1,RRAS2,SHC1,STAT3,STAT5B,STAT6
	BBSome Signaling Pathway	0	0.104	3.175	ADGRD1,ASXL1,ASXL2,ATF6,BBS9,CCT2,CCT4,CCT5,CCT6A,CCT8,CUL3,CXCL12,EDNRA,ERN1,EZH2,FZD1,FZD2,FZD4,GABBR1,GLI3,GPR107,GPR108,GPR39,GPRC5B,IFT27,IFT43,IFT81,IGF1R,INSR,INVS,LGR4,LPAR1,MAP2K4,MAPK1,MAPK14,NTRK2,PCM1,PJA2,PRKACB,PRKAG1,PRKAG2,PTGER4,RAB5A,RAB5B,RAB5C,RHOA,RNF2,S1PR2,SMO,STAT3,TCP1			BBSome Signaling Pathway	0	0.0552	2.353	ACKR3,ADGRD1,ADGRL1,ATF6,CCT2,CCT5,CUL3,F2R,FZD2,FZD4,GLIS2,GPR39,IFT20,IFT27,LPAR1,LZTFL1,PCM1,PHF1,PJA2,PKD1,PRKAR1A,PTCH1,PTGFR,RAB5A,RHOA,RNF2,XBP1				BBSome Signaling Pathway	0	0.121	-3.742	ADGRA2,ADGRD1,ASXL1,ASXL2,ATF6,BBIP1,CCT2,CCT3,CCT5,CCT6A,CCT8,CUL3,CXCL12,DNM1L,ERN1,EZH2,F2R,FZD2,FZD4,FZD7,GABBR1,GLI3,GPR107,GPR153,GPR180,GPR39,GPRC5B,IFT20,IFT27,IFT43,IFT57,IFT81,IGF1R,INSR,INVS,LPAR1,LZTFL1,MAP2K4,MAPK1,MAPK14,NTRK2,PCM1,PJA2,PKD1,PRKACA,PRKACB,PRKAG1,PRKAG2,RAB5A,RAB5B,RAB5C,RAB8A,RNF2,S1PR2,SMO,STAT3,TCP1,WDR35,XBP1
	T Cell Receptor Signaling	0	0.0844	3	AKT1S1,AKT3,Calm1 (includes others),CDKN1B,CHP1,CHUK,FOS,FOXO3,FYN,GRB2,GSK3B,H2-T22,HLA-A,HLA-E,HLA-G,ICAM1,ITGB1,JUN,MAP2K1,MAP2K4,MAPK1,MAPK14,MAPK3,MAPK8,MR1,NCK1,NFAT5,NFATC1,NFKB1,NFKB2,NFKBIA,NFKBIB,NRAS,PIK3C2A,PIK3CA,PIK3R1,PIK3R2,PPP3CA,PPP3CB,PTPN11,RALB,RAP1B,RAP2A,RAP2B,RASA1,RELB,RRAS2,SOS2,TCF3,TCF4,TCF7L1,TCF7L2			T Cell Receptor Signaling	0	0.0617	2.667	AKT1,AKT2,AKT3,ATF2,B2M,Calm1 (includes others),CHP1,CSK,CTNNB1,FOS,GSK3B,H2-T22,HLA-A,HLA-E,HRAS,ITGB1,JUN,MAP2K1,MAP2K2,MAP2K3,MAPK3,MR1,NCK1,NFAT5,NFATC3,PIK3C2A,PIK3R2,PPP3CB,PPP3R1,PTPN11,RAF1,RALB,RAP1A,RAP1B,RASA1,RRAS,RRAS2,TCF4				T Cell Receptor Signaling	0	0.0942	-3.101	AKT1,AKT1S1,AKT2,AKT3,ATF2,BCL10,Calm1 (includes others),CBL,CDKN1B,CHUK,CTNNB1,DUSP5,FOS,GRB2,GSK3B,H2-T22,HLA-A,HLA-G,ICAM1,ITGB1,KRAS,MAP2K1,MAP2K3,MAP2K4,MAPK1,MAPK14,MAPK8,MR1,NCK1,NFAT5,NFATC1,NFKB1,NFKB2,NRAS,PIK3C2A,PIK3CA,PPP3CA,PPP3CB,PTPN11,RAC1,RALA,RALB,RAP1A,RAP1B,RAP2A,RAP2B,RASA1,REL,RELA,RELB,RRAS2,SOS1,SOS2,TCF3,TCF4,TCF7L1,TCF7L2,VAV3
	Atherosclerosis Signaling	0	0.158	2.982	APOD,COL1A1,COL3A1,CSF1,CXCL12,F3,GLG1,ICAM1,IL33,IL6,MMP3,NFKB1,NFKB2,PCYOX1,PDGFD,PLA2G12A,PNPLA8,PRDX6,RBP4,RELB,VCAM1			Atherosclerosis Signaling	0.993	0.15	2.357	APOE,COL1A1,COL1A2,COL3A1,CSF1,F3,IL33,LPL,PCYOX1,PDGFA,PDGFD,PLA2G12A,PLA2G4A,PNPLA2,PNPLA8,PRDX6,RBP4,TGFB1,TNFRSF12A,TNFSF12				Atherosclerosis Signaling	0.449	0.188	-3.545	APOE,COL1A1,COL1A2,COL3A1,CSF1,CXCL12,F3,GLG1,ICAM1,IL33,LPL,MMP3,NFKB1,NFKB2,PDGFA,PDGFD,PLAAT3,PNPLA8,PRDX6,RBP4,REL,RELA,RELB,TNFRSF12A,VCAM1
	Dermatan Sulfate Biosynthesis	0	0.127	2.828	CHST12,CHSY3,CSGALNACT2,DSE,DSEL,HS2ST1,NDST1,UST			Dermatan Sulfate Biosynthesis	0	0.0635	2	B3GAT3,CSGALNACT2,NDST1,UST				Dermatan Sulfate Biosynthesis	0	0.111	-2.646	B3GAT3,CHST12,CHSY1,DSE,HS2ST1,NDST1,UST
	Nonhomologous End-Joining (NHEJ)	0	0.163	2.828	BABAM1,BABAM2,HERC2,RAD50,RIF1,TDP2,UBE2V2,UIMC1			Nonhomologous End-Joining (NHEJ)	0	0.0816	2	HERC2,UBE2N,UBE2V2,UIMC1				Nonhomologous End-Joining (NHEJ)	0.32	0.184	-2.333	BABAM1,BABAM2,RAD50,RIF1,TDP2,UBE2N,UBE2V2,UIMC1,XRCC4
	Heparan Sulfate Biosynthesis	0	0.11	2.53	CHST12,EXT1,EXT2,EXTL3,GLCE,HS2ST1,NDST1,PPME1,PRDX6,UST			Heparan Sulfate Biosynthesis	0	0.0659	2.449	AARSD1,B3GAT3,NDST1,PPME1,PRDX6,UST				Heparan Sulfate Biosynthesis	0	0.132	-2.309	AARSD1,B3GAT3,CHST12,EXT1,EXT2,EXTL3,GLCE,HS2ST1,NDST1,PPME1,PRDX6,UST
	Heparan Sulfate Biosynthesis (Late Stages)	0	0.119	2.53	CHST12,EXT1,EXT2,EXTL3,GLCE,HS2ST1,NDST1,PPME1,PRDX6,UST			Heparan Sulfate Biosynthesis (Late Stages)	0	0.0595	2.236	AARSD1,NDST1,PPME1,PRDX6,UST				Heparan Sulfate Biosynthesis (Late Stages)	0	0.131	-2.111	AARSD1,CHST12,EXT1,EXT2,EXTL3,GLCE,HS2ST1,NDST1,PPME1,PRDX6,UST
	Chondroitin Sulfate Biosynthesis	0	0.0984	2.449	CHST12,CHSY3,CSGALNACT2,HS2ST1,NDST1,UST			Chondroitin Sulfate Biosynthesis	0	0.0656	2	B3GAT3,CSGALNACT2,NDST1,UST				Chondroitin Sulfate Biosynthesis	0	0.0984	-2.449	B3GAT3,CHST12,CHSY1,HS2ST1,NDST1,UST
	Pathways decreased by D and reversed by APOC3 ASO
235	PTEN Signaling	12.7	0.417	-4.45	AKT3,BCL2,BCL2L1,BCL2L11,BMPR1A,BMPR2,CDKN1A,CDKN1B,CHUK,CSNK2A1,CSNK2A2,EGFR,FGFR1,FGFR2,FLT1,FOXO1,FOXO3,GHR,GRB2,GSK3B,IGF1R,INSR,ITGA1,ITGA5,ITGA9,ITGAV,ITGB1,ITGB5,ITGB8,MAGI1,MAGI2,MAGI3,MAP2K1,MAPK1,MAPK3,MAST2,NFKB1,NFKB2,NRAS,NTRK2,NTRK3,OCRL,PDGFRA,PDGFRB,PDPK1,PIK3CA,PIK3R1,PIK3R2,PREX2,PTK2,RALB,RAP1B,RAP2A,RAP2B,RELB,RPS6KB1,RRAS2,SHC1,SOS2,SYNJ1,SYNJ2,TGFBR2,TGFBR3			PTEN Signaling	7.38	0.272	-3.781	AKT1,AKT2,AKT3,BAD,BCL2L1,BMPR1A,BMPR2,CDKN1A,CSNK2A1,CSNK2B,FGFR1,FGFR2,FLT1,GHR,GSK3B,HRAS,ILK,ITGA8,ITGAV,ITGB1,ITGB5,MAGI2,MAP2K1,MAP2K2,MAPK3,PDGFRA,PIK3R2,PREX2,PTEN,PTK2,RAF1,RALB,RAP1A,RAP1B,RPS6KB1,RRAS,RRAS2,SHC1,TGFBR1,TGFBR3,YWHAH				PTEN Signaling	11.3	0.411	3.266	AKT1,AKT2,AKT3,BCL2,BCL2L11,BMPR1A,BMPR2,CBL,CDKN1A,CDKN1B,CHUK,CSNK2A1,CSNK2A2,EGFR,FGFR1,FGFR2,FLT1,GHR,GRB2,GSK3B,IGF1R,IGF2R,INSR,ITGA1,ITGA9,ITGAV,ITGB1,ITGB5,ITGB8,KRAS,MAGI1,MAGI2,MAGI3,MAP2K1,MAPK1,MAST2,NFKB1,NFKB2,NRAS,NTRK2,OCRL,PDGFRB,PDPK1,PIK3CA,PTK2,RAC1,RALA,RALB,RAP1A,RAP1B,RAP2A,RAP2B,REL,RELA,RELB,RPS6KB1,RRAS2,SHC1,SOS1,SOS2,SYNJ2,TGFBR2
	Pathways increased by D but not reversed by APOC3 ASO
236	Sertoli Cell-Germ Cell Junction Signaling Pathway (Enhanced)	13	0.364	2.588	ACTA2,ACTB,ACTG1,ACTR3,AFDN,AKT3,ARPC1B,ARPC2,ARPC5,AXIN1,CD2AP,CTNNA1,CTNND1,EPS8,FOS,FOSB,FOSL2,GJA1,GSK3B,GUCY1A1,GUCY1A2,GUCY1B1,ICAM1,IL1R1,IL1RAP,IQGAP1,ITGB1,JUN,LAMA2,LAMA4,LAMB1,LAMB2,LAMC1,LAMC3,MAP2K1,MAP2K4,MAP3K14,MAP3K2,MAP3K3,MAP3K4,MAP3K5,MAP3K6,Map3k7,MAP3K8,MAPK1,MAPK14,MAPK3,MAPK8,MAPK9,MMP2,MTMR2,NECTIN3,NFKB1,NFKB2,NRAS,PDPK1,PIK3C2A,PIK3CA,PIK3R1,PIK3R2,PPP2CA,PPP2CB,PPP2R2A…			Sertoli Cell-Germ Cell Junction Signaling Pathway (Enhanced)	7.52	0.237	2.673	ACTA2,ACTG1,ACTR2,ACTR3,AKT1,AKT2,AKT3,ARPC1B,ARPC2,ARPC3,ARPC4,ARPC5,ARPC5L,CTNNB1,CTNND1,FOS,FOSB,GSK3B,GUCY1A1,HRAS,IL1R1,ILK,ITGB1,JAM2,JUN,LAMA2,LAMB1,LAMC1,MAP2K1,MAP2K2,MAP2K3,MAP3K2,Map3k7,MAPK3,MMP2,NECTIN3,PIK3C2A,PIK3R2,PPP2CA,PRKAR1A,PTK2,RALB,RAP1A,RAP1B,RRAS,RRAS2,SMAD3,SP3,TGFB1,TGFB2,TGFB3,TGFBR1,TNFRSF11B,TNFRSF1A,UBE2J1,ZYX				Sertoli Cell-Germ Cell Junction Signaling Pathway (Enhanced)	13.3	0.377	-1.802	ACTA2,ACTG1,ACTR3,AKT1,AKT2,AKT3,ARPC1B,ARPC2,ARPC4,ARPC5,CD2AP,CTNNA1,CTNNB1,CTNND1,EPS8,FOS,FOSB,GSK3B,GUCY1A1,GUCY1A2,ICAM1,IL1R1,IL1RAP,IQGAP1,ITGB1,JAM2,JAM3,JUP,KRAS,LAMA4,LAMB1,LAMC1,LAMC3,MAP2K1,MAP2K3,MAP2K4,MAP3K14,MAP3K2,MAP3K3,MAP3K4,MAP3K5,MAP3K6,Map3k7,MAPK1,MAPK14,MAPK8,MMP2,MTMR2,NECTIN3,NFKB1,NFKB2,NRAS,PDPK1,PIK3C2A,PIK3CA,PPP2CA,PPP2CB,PPP2R1A,PPP2R2A,PPP2R2D,PPP2R3A,PPP2R5A,PP…
237	LPS-stimulated MAPK Signaling	7.77	0.424	2.611	ATF1,CHUK,CREB1,FOS,JUN,LBP,MAP2K1,MAP2K4,MAP3K14,MAP3K5,MAPK1,MAPK14,MAPK3,MAPK8,MAPK9,NFKB1,NFKB2,NFKBIA,NFKBIB,NRAS,PIK3C2A,PIK3CA,PIK3R1,PIK3R2,PRKCA,PRKCE,PRKCI,PRKD1,PRKD3,RALB,RAP1B,RAP2A,RAP2B,RELB,RRAS2,TLR4			LPS-stimulated MAPK Signaling	3.05	0.235	3.441	ATF1,ATF2,FOS,HRAS,JUN,LBP,MAP2K1,MAP2K2,MAP2K3,MAPK3,PIK3C2A,PIK3R2,PRKCA,RAF1,RALB,RAP1A,RAP1B,RRAS,RRAS2,TLR4				LPS-stimulated MAPK Signaling	6.73	0.412	-1.976	ATF1,ATF2,CHUK,CREB1,FOS,KRAS,LBP,MAP2K1,MAP2K3,MAP2K4,MAP3K14,MAP3K5,MAPK1,MAPK14,MAPK8,NFKB1,NFKB2,NRAS,PIK3C2A,PIK3CA,PRKCA,PRKCE,PRKCI,RAC1,RALA,RALB,RAP1A,RAP1B,RAP2A,RAP2B,REL,RELA,RELB,RRAS2,TLR4
238	Remodeling of Epithelial Adherens Junctions	7.07	0.441	3.317	ACTA2,ACTB,ACTG1,ACTN1,ACTN4,ACTR3,APC,ARPC1B,ARPC2,ARPC5,CLIP1,CTNNA1,CTNND1,DNM1,DNM2,DNM3,EXOC2,IQGAP1,Mapre2,RAB5A,RAB5B,RAB5C,RAB7A,TUBA1A,TUBA1B,TUBA1C,TUBB,TUBB2A,TUBB4B,ZYX			Remodeling of Epithelial Adherens Junctions	8.94	0.397	3.606	ACTA2,ACTG1,ACTN1,ACTN4,ACTR2,ACTR3,APC,ARPC1B,ARPC2,ARPC3,ARPC4,ARPC5,ARPC5L,CLIP1,CTNNB1,CTNND1,DNM1,MAPRE1,NME1,RAB5A,RAB7A,TUBA1B,TUBA1C,TUBB2A,TUBB2B,TUBB4B,ZYX				Remodeling of Epithelial Adherens Junctions	7.88	0.471	-1.941	ACTA2,ACTG1,ACTN1,ACTN4,ACTR3,APC,ARPC1B,ARPC2,ARPC4,ARPC5,CLIP1,CTNNA1,CTNNB1,CTNND1,DNM1L,DNM2,DNM3,EXOC2,IQGAP1,MAPRE1,Mapre2,MAPRE3,RAB5A,RAB5B,RAB5C,RAB7A,RALA,TUBA1C,TUBB2A,TUBB4B,TUBB6,VCL
239	ERB2-ERBB3 Signaling	4.71	0.385	3.128	CDKN1B,FOXO1,GRB2,GSK3B,JUN,MAP2K1,MAPK1,MAPK3,MYC,NRAS,PDPK1,PIK3C2A,PIK3CA,PIK3R1,PIK3R2,RALB,RAP1B,RAP2A,RAP2B,RRAS2,SHC1,SOS2,SP1,STAT3,STAT5B			ERB2-ERBB3 Signaling	3.72	0.277	2.668	AKT1,BAD,GSK3B,HRAS,JUN,MAP2K1,MAP2K2,MAPK3,PIK3C2A,PIK3R2,PTEN,RAF1,RALB,RAP1A,RAP1B,RRAS,RRAS2,SHC1				ERB2-ERBB3 Signaling	3.91	0.369	-1.877	AKT1,CDKN1B,GRB2,GSK3B,KRAS,MAP2K1,MAPK1,NRAS,PDPK1,PIK3C2A,PIK3CA,RALA,RALB,RAP1A,RAP1B,RAP2A,RAP2B,RRAS2,SHC1,SOS1,SOS2,SP1,STAT3,STAT5B
240	Regulation of Cellular Mechanics by Calpain Protease	4.56	0.344	2.524	ACTN1,ACTN4,CAPN2,CAPN7,CAPNS1,CAST,CCND2,CCND3,CDKN1B,EGFR,GRB2,ITGA1,ITGA5,ITGA9,ITGAV,ITGB1,ITGB5,ITGB8,MAPK1,MAPK3,NRAS,PTK2,PXN,RALB,RAP1B,RAP2A,RAP2B,RB1,RRAS2,TLN1,TLN2			Regulation of Cellular Mechanics by Calpain Protease	2.73	0.222	2.714	ACTN1,ACTN4,CAPNS1,CAST,CCND2,CCND3,CDK4,HRAS,ITGA8,ITGAV,ITGB1,ITGB5,MAPK3,PTK2,PXN,RALB,RAP1A,RAP1B,RRAS,RRAS2				Regulation of Cellular Mechanics by Calpain Protease	4.62	0.356	-1.606	ACTN1,ACTN4,CAPN7,CAPNS1,CAST,CCND2,CDK4,CDKN1B,EGFR,GRB2,ITGA1,ITGA9,ITGAV,ITGB1,ITGB5,ITGB8,KRAS,MAPK1,NRAS,PTK2,PXN,RALA,RALB,RAP1A,RAP1B,RAP2A,RAP2B,RB1,RRAS2,TLN1,TLN2,VCL
241	E3 ubiquitin ligases ubiquitinate target proteins	4.53	0.4	2.985	CDC73,CTR9,HLA-A,PAF1,PCNA,PEX13,PEX2,RNF144A,RNF181,RNF20,RTF1,SHPRH,UBC,UBE2A,UBE2B,UBE2D1,UBE2D3,UBE2J2,UBE2L3,UBE2V2,VCP,WAC			E3 ubiquitin ligases ubiquitinate target proteins	6.07	0.364	2.683	HLA-A,PCNA,PEX13,RNF144A,RNF181,RNF20,RPS27A,RRAGA,RTF1,SELENOS,UBC,UBE2A,UBE2B,UBE2D2,UBE2D3,UBE2E1,UBE2J2,UBE2N,UBE2V2,WAC				E3 ubiquitin ligases ubiquitinate target proteins	3.73	0.382	-1.528	BCL10,CDC73,CTR9,HLA-A,PAF1,PCNA,PEX13,PEX2,RNF144A,RNF20,RTF1,UBC,UBE2B,UBE2D1,UBE2D2,UBE2D3,UBE2L3,UBE2N,UBE2V2,VCP,WAC
242	Reelin Signaling in Neurons	4.08	0.297	4.644	ACTR3,AFDN,AKT3,APP,ARHGEF1,ARHGEF10,ARHGEF11,ARHGEF12,ARHGEF25,ARHGEF28,ARHGEF6,ARPC1B,ARPC2,ARPC5,CAMK2D,CRK,CRKL,FYN,GSK3B,ITGA5,ITGB1,MAP2K1,MAP2K4,MAP2K5,MAPK1,MAPK3,MAPK8,MAPK9,NDEL1,NECTIN3,PAFAH1B1,PDK4,PIK3C2A,PIK3CA,PIK3R1,PIK3R2,RAP1B,RAPGEF1,RHOA,VLDLR,YES1			Reelin Signaling in Neurons	3.99	0.225	3.9	ACTR2,ACTR3,AKT1,AKT2,AKT3,APOE,APP,ARHGEF12,ARPC1B,ARPC2,ARPC3,ARPC4,ARPC5,ARPC5L,CAMK2D,CFL1,CRK,GRINA,GSK3B,ITGB1,MAP2K1,MAP2K2,MAP2K3,MAPK3,NECTIN3,PAFAH1B2,PIK3C2A,PIK3R2,RAP1A,RAP1B,RHOA				Reelin Signaling in Neurons	3.99	0.304	-1.622	ACTR3,AKT1,AKT2,AKT3,APOE,APP,ARHGEF1,ARHGEF10,ARHGEF11,ARHGEF12,ARHGEF2,ARHGEF25,ARHGEF28,ARHGEF40,ARHGEF6,ARPC1B,ARPC2,ARPC4,ARPC5,CAMK2D,CFL1,CRK,CRKL,GSK3B,ITGB1,MAP2K1,MAP2K3,MAP2K4,MAP2K5,MAPK1,MAPK8,MAPK8IP3,NDEL1,NECTIN3,PAFAH1B1,PDK4,PIK3C2A,PIK3CA,RAC1,RAP1A,RAP1B,YES1
243	Macroautophagy	3.74	0.354	3.545	AMBRA1,ATG10,ATG12,ATG13,ATG3,BECN1,CHMP2A,CHMP3,DYNLL1,GABARAP,GABARAPL1,LAMTOR1,MAP1LC3B,PRKAG1,PRKAG2,RB1CC1,RRAGC,SLC38A9,UVRAG,WDR45,WDR45B,WIPI1,WIPI2			Macroautophagy	4.79	0.308	3.578	ATG12,ATG3,ATG5,CHMP2A,CHMP2B,CHMP4B,GABARAP,GABARAPL2,LAMTOR1,LAMTOR2,LAMTOR3,LAMTOR4,LAMTOR5,MAP1LC3A,MAP1LC3B,RB1CC1,RHEB,RRAGA,RRAGC,UVRAG				Macroautophagy	4.9	0.4	-1.569	AMBRA1,ATG10,ATG12,ATG13,ATG3,ATG4B,ATG5,BECN1,CHMP3,DYNLL1,DYNLL2,GABARAPL1,LAMTOR1,LAMTOR3,LAMTOR4,MAP1LC3A,PRKAB2,PRKAG1,PRKAG2,RB1CC1,RRAGC,SLC38A9,UVRAG,WDR45B,WIPI1,WIPI2
244	Netrin-1 signaling	3.64	0.38	2.982	ABLIM1,DOCK1,FYN,MAPK14,MAPK8,MYO10,NCK1,PITPNA,PTK2,PTPN11,RGMA,ROBO1,SIAH1,SIAH2,SLIT2,SLIT3,TRPC1,UNC5B,UNC5C			Netrin-1 signaling	0.725	0.16	2.828	NCK1,NTN1,NTN4,PITPNA,PTK2,PTPN11,SIAH1,SLIT3				Netrin-1 signaling	4.45	0.42	-1.964	ABLIM1,DOCK1,MAPK14,MAPK8,MYO10,NCK1,NEO1,PITPNA,PTK2,PTPN11,RAC1,RGMA,ROBO1,SIAH1,SIAH2,SLIT2,SLIT3,TRIO,TRPC1,UNC5B,UNC5C
245	Factors involved in megakaryocyte development and platelet production	3.63	0.319	4.642	ABL1,ACTB,AK3,AKAP10,CABLES1,CAPZA1,CAPZA2,CAPZB,CARMIL1,DOCK1,DOCK10,DOCK4,DOCK7,DOCK9,HDAC1,HMG20B,IRF2,JAK2,KDM1A,MAFG,MFN1,PHF21A,PRKACB,RAB5A,RAD51B,RCOR1,SIN3A,TP53,ZFPM2			Factors involved in megakaryocyte development and platelet production	1.65	0.187	3.153	ABL1,AK3,CAPZA1,CAPZA2,DOCK10,DOCK4,DOCK6,DOCK7,DOCK9,EHD1,GATA6,HDAC2,HMG20B,PRKAR1A,RAB5A,TP53,ZFPM2				Factors involved in megakaryocyte development and platelet production	3.69	0.33	-1.826	ABL1,AK3,AKAP10,CABLES1,CAPZA1,CAPZB,CARMIL1,DOCK1,DOCK10,DOCK4,DOCK7,DOCK9,GATA6,HDAC1,HMG20B,JAK2,KDM1A,MAFG,MFN1,MFN2,MICAL1,PHF21A,PRKACA,PRKACB,RAB5A,RAC1,RAD51B,RCOR1,TP53,ZFPM2
246	Signaling by NTRK2 (TRKB)	3.59	0.48	2.887	FRS2,FYN,GAB1,GRB2,NRAS,NTF3,NTRK2,PIK3CA,PIK3R1,PTPN11,SHC1,TIAM1			Signaling by NTRK2 (TRKB)	0.52	0.16	2	HRAS,NTF3,PTPN11,SHC1				Signaling by NTRK2 (TRKB)	3.41	0.48	-1.732	FRS2,GAB1,GRB2,KRAS,NRAS,NTRK2,PIK3CA,PTPN11,RAC1,SHC1,SOS1,TIAM1
247	YAP1- and WWTR1 (TAZ)-stimulated gene expression	2.2	0.467	2.646	CCN2,HIPK1,HIPK2,KAT2B,TEAD1,WWTR1,YAP1			YAP1- and WWTR1 (TAZ)-stimulated gene expression	1.11	0.267	2	CCN2,HIPK1,KAT2B,TEAD1				YAP1- and WWTR1 (TAZ)-stimulated gene expression	1.49	0.4	-1.633	CCN2,HIPK2,KAT2B,TEAD1,WWTR1,YAP1
	RNA polymerase II transcribes snRNA genes	0.689	0.205	2.668	CCNT1,CCNT2,CDK7,ELL2,GTF2A1,INTS13,INTS6,POLR2A,POLR2D,POU2F1,RPRD1A,RPRD1B,RPRD2,SNAPC3,SP1,SUPT5H,TAF13			RNA polymerase II transcribes snRNA genes	3.19	0.241	2.236	CCNT2,CDK9,GTF2A2,GTF2B,INTS6,NABP2,PHAX,POLR2A,POLR2C,POLR2F,POLR2G,POLR2H,POLR2J,POLR2K,RPRD1A,SNAPC5,SSU72,SUPT4H1,TAF11,TAF13				RNA polymerase II transcribes snRNA genes	2.91	0.313	-1.961	CCNT1,CCNT2,ELL2,GTF2A1,GTF2B,GTF2F1,INTS13,INTS6,NABP1,NCBP2,PCF11,POLR2A,POLR2E,POU2F1,RPRD1A,RPRD1B,RPRD2,SNAPC1,SNAPC3,SNAPC5,SP1,SRRT,SSU72,SUPT5H,TAF11,TAF13
	Class I peroxisomal membrane protein import	0.644	0.25	2.236	ABCD3,ACBD5,PEX13,PEX2,PEX3			Class I peroxisomal membrane protein import	1.73	0.3	2.449	ACBD5,ATAD1,FIS1,PEX13,PEX19,SLC25A17				Class I peroxisomal membrane protein import	0.933	0.3	-1.633	ABCD3,ACBD5,ALDH3A2,PEX13,PEX2,PEX3
	Rap1 signalling	0.574	0.25	2	PRKACB,PRKG1,RAP1B,YWHAB			Rap1 signalling	1.58	0.312	2.236	RAF1,RAP1A,RAP1B,RASGRP2,YWHAZ				Rap1 signalling	1.35	0.375	-1.633	PRKACA,PRKACB,PRKG1,RAP1A,RAP1B,YWHAB
	Regulation of IL-2 Expression in Activated and Anergic T Lymphocytes	0	0.0736	2.058	Calm1 (includes others),CHP1,CHUK,FOS,FYN,GRB2,JUN,MAP2K1,MAP2K4,MAPK1,MAPK3,MAPK8,MAPK9,NFAT5,NFATC1,NFKB1,NFKB2,NFKBIA,NFKBIB,NRAS,PABPC4,PPP3CA,PPP3CB,RALB,RAP1B,RAP2A,RAP2B,RELB,RRAS2,SMAD3,SMAD4,SOS2,TGFB2,TGFBR2			Regulation of IL-2 Expression in Activated and Anergic T Lymphocytes	0	0.0519	2.041	Calm1 (includes others),CHP1,FOS,HRAS,JUN,MAP2K1,MAP2K2,MAPK3,NFAT5,NFATC3,PPP3CB,PPP3R1,RAF1,RALB,RAP1A,RAP1B,RRAS,RRAS2,SMAD3,SMAD4,TGFB1,TGFB2,TGFB3,TGFBR1				Regulation of IL-2 Expression in Activated and Anergic T Lymphocytes	0	0.0823	-1.947	BCL10,Calm1 (includes others),CHUK,FOS,GRB2,KRAS,MAP2K1,MAP2K4,MAPK1,MAPK8,NFAT5,NFATC1,NFKB1,NFKB2,NRAS,PABPC4,PPP3CA,PPP3CB,RAC1,RALA,RALB,RAP1A,RAP1B,RAP2A,RAP2B,REL,RELA,RELB,RRAS2,SMAD3,SMAD4,SOS1,SOS2,TGFB2,TGFB3,TGFBR2,TOB1,VAV3
	G alpha (q) signalling events	0	0.115	2.683	ANXA1,APP,ARHGEF25,EDNRA,GNAQ,GNB4,GNG10,GNG11,GNG12,GNG5,GPR39,GRK5,KALRN,LPAR1,PIK3CA,PIK3R1,PIK3R2,PLCB1,PLCB4,RGS5			G alpha (q) signalling events	0	0.0805	2.138	ANXA1,APP,F2R,GNB1,GNB2,GNB4,GNG10,GNG5,GNG8,GPR39,LPAR1,PIK3R2,PLCB4,PTGFR				G alpha (q) signalling events	0	0.103	-1.886	ANXA1,APP,ARHGEF25,F2R,GNA11,GNAQ,GNB4,GNG11,GNG12,GNG5,GNG8,GPR39,GRK5,KALRN,LPAR1,PIK3CA,PLCB1,TRIO
	Th17 Activation Pathway	0	0.0455	3.578	HIF1A,HSP90AA1,HSP90AB1,HSP90B1,IL1R1,IL6,IL6R,IRAK1,IRAK3,JAK1,JAK2,MYD88,NFAT5,NFATC1,NFKB1,NFKB2,PTGER4,RELB,RORA,RUNX1,SOCS3,STAT3			Th17 Activation Pathway	0	0.0165	2.121	HIF1A,HSP90AA1,HSP90AB1,HSP90B1,IL1R1,IRAK1,NFAT5,NFATC3				Th17 Activation Pathway	0	0.0413	-1.698	HIF1A,HSP90AA1,HSP90AB1,HSP90B1,IL1R1,IL6R,IRAK1,IRAK3,JAK1,JAK2,NFAT5,NFATC1,NFKB1,NFKB2,REL,RELA,RELB,RORA,RUNX1,STAT3
	Complement cascade	0	0.0889	2.887	C1R,C1S,C2,C3,C4A/C4B,C7,CD81,CFB,CFH,COLEC11,PROS1,SERPING1			Complement cascade	0	0.0741	3.162	C1S,C2,C4A/C4B,C7,CD81,CFB,CFH,COLEC11,PROS1,SERPING1				Complement cascade	0	0.0815	-1.508	C1R,C2,C3,C4A/C4B,C7,CD55,CFB,CFH,COLEC11,PROS1,SERPING1

## Sheet: Fibro_Upstream_reg
This analyis was not carried out

## Sheet: SMC_IPA
	NDvsD_LCMV							NDvsD_STZ								cASOvsAPOC3_LCMV
	Ingenuity Canonical Pathways	-log(p-value)	Ratio	z-score	Molecules			Ingenuity Canonical Pathways	-log(p-value)	Ratio	z-score	Molecules				Ingenuity Canonical Pathways	-log(p-value)	Ratio	z-score	Molecules
Number of signficant pathways	Pathways increased by D and reversed by APOC3 ASO
1	Autophagy	41.4	0.724	4.639	AKT1,AKT1S1,AKT2,AKT3,AMBRA1,ARL8B,ARNT,ATF2,ATF4,ATG10,ATG101,ATG12,ATG13,ATG14,ATG16L1,ATG2A,ATG2B,ATG3,ATG4B,ATG5,ATG7,ATG9A,ATM,ATR,BAD,BCL2,BECN1,BIRC6,BNIP3,Calm1 (includes others),CAMKK2,CDKN1B,CHP1,CREB1,CREB3,CREB3L1,CREB3L2,CREB5,CREBBP,DAPK2,DAPK3,DDIT3,DRAM1,EIF2A,EIF2AK3,EPG5,ERN1,FGF2,FOS,FOXO1,FOXO3,FUNDC1,GABARAP,GABARAPL1,GABARAPL2,GNAI3,GORASP2,GSK3A,GSK3B,HIF1A,INSR,IRS1,IRS2,J…			Autophagy	15	0.442	3.669	AKT1,AKT1S1,AKT2,AMBRA1,ARNT,ATF2,ATF4,ATG10,ATG101,ATG16L1,ATG3,BAD,BCL2,BIRC6,BNIP3,Calm1 (includes others),CAMKK2,CREB1,CREB3,CREB3L1,CREB3L2,CREBBP,DAPK2,DAPK3,DDIT3,EIF2A,ERN1,FGF2,FOS,FOXO1,GABARAP,GABARAPL1,GABARAPL2,GNAI3,GORASP2,GSK3A,HIF1A,INSR,IRS1,IRS2,JUN,LAMP1,LAMP2,MAP1LC3A,MAP1LC3B,MAP2K1,MAP2K2,MAP2K4,MAP2K7,MAPK3,MAPK8,MAPK9,MTOR,NRBF2,OPTN,PI4K2A,PIK3C2A,PIK3CB,PIK3R1,PIK3R3,PP…				Autophagy	35	0.687	-2.76	AKT1,AKT1S1,AKT2,AKT3,AMBRA1,ARL8B,ARNT,ATF2,ATF4,ATG10,ATG101,ATG12,ATG13,ATG14,ATG16L1,ATG2A,ATG2B,ATG4B,ATG5,ATG7,ATG9A,ATM,ATR,BCL2,BECN1,BIRC6,Calm1 (includes others),CAMKK2,CDKN1B,CHP1,CREB1,CREB3L1,CREB3L2,CREB5,CREBBP,DAPK3,DDIT3,EIF2A,EIF2AK3,EPG5,ERN1,FOS,FOXO1,FOXO3,GABARAP,GABARAPL1,GABARAPL2,GNAI3,GORASP2,GSK3A,GSK3B,HIF1A,INSR,IRS1,IRS2,JUN,KAT5,LAMP1,LAMP2,MAP1LC3B,MAP2K1,MAP2K2,MA…
2	Protein Ubiquitination Pathway	41.3	0.674	4.385	AMFR,ANAPC1,ANAPC11,ANAPC2,ANAPC4,ANAPC5,BAG1,BAP1,BIRC2,BIRC3,BIRC6,BTRC,CBL,CDC23,CDC34,CRYAB,CUL1,CUL2,DNAJA1,DNAJB1,DNAJB11,DNAJB12,DNAJB14,DNAJB2,DNAJB4,DNAJB6,DNAJB9,DNAJC1,DNAJC10,DNAJC11,DNAJC13,DNAJC14,DNAJC17,DNAJC18,DNAJC19,DNAJC2,DNAJC21,DNAJC24,DNAJC25,DNAJC27,DNAJC3,DNAJC30,DNAJC4,DNAJC5,DNAJC7,DNAJC8,DNAJC9,ELOC,FBXW7,FZR1,HLA-A,HLA-E,HSP90AA1,HSP90AB1,HSP90B1,HSPA13,HSPA14,HSPA1A/…			Protein Ubiquitination Pathway	32.8	0.531	5.167	ANAPC10,ANAPC11,ANAPC2,ANAPC4,ANAPC5,B2M,BAG1,BIRC2,BIRC6,CDC34,CRYAB,CUL2,DNAJA1,DNAJB1,DNAJB11,DNAJB12,DNAJB14,DNAJB2,DNAJB4,DNAJB5,DNAJB6,DNAJB9,DNAJC1,DNAJC10,DNAJC13,DNAJC14,DNAJC15,DNAJC17,DNAJC19,DNAJC2,DNAJC21,DNAJC24,DNAJC25,DNAJC3,DNAJC30,DNAJC4,DNAJC7,DNAJC8,ELOC,HLA-A,HSP90AA1,HSP90AB1,HSP90B1,HSPA14,HSPA1A/HSPA1B,HSPA2,HSPA4,HSPA4L,HSPA5,HSPA8,HSPA9,HSPB1,HSPB2,HSPB7,HSPB8,HSPD1,HSPE…				Protein Ubiquitination Pathway	30.4	0.615	-3.436	AMFR,ANAPC1,ANAPC10,ANAPC2,ANAPC4,ANAPC5,BAP1,BIRC2,BIRC3,BIRC6,BTRC,CBL,CDC23,CDC34,CRYAB,CUL1,CUL2,DNAJB1,DNAJB11,DNAJB12,DNAJB14,DNAJB2,DNAJB4,DNAJB5,DNAJB6,DNAJB9,DNAJC1,DNAJC11,DNAJC13,DNAJC14,DNAJC15,DNAJC17,DNAJC18,DNAJC19,DNAJC2,DNAJC21,DNAJC24,DNAJC25,DNAJC27,DNAJC30,DNAJC4,DNAJC5,DNAJC7,DNAJC8,DNAJC9,ELOC,FBXW7,FZR1,HSCB,HSP90AA1,HSP90AB1,HSP90B1,HSPA13,HSPA14,HSPA1A/HSPA1B,HSPA2,HSPA4,…
3	Class I MHC mediated antigen processing and presentation	38.7	0.603	6.253	ANAPC1,ANAPC11,ANAPC13,ANAPC2,ANAPC4,ANAPC5,ANAPC7,ARIH2,ASB13,ASB2,ASB3/GPR75-ASB3,ASB7,ASB8,ATG14,ATG7,BCAP31,BECN1,BTBD1,BTBD6,BTRC,CALR,CBLB,CDC16,CDC23,CDC27,CDC34,CHUK,CTSV,CUL1,CUL2,CUL3,CUL5,CYBA,DCAF1,ELOC,ERAP1,FBXL14,FBXL15,FBXL20,FBXL3,FBXL4,FBXL5,FBXL7,FBXO10,FBXO11,FBXO2,FBXO21,FBXO22,FBXO30,FBXO31,FBXO32,FBXO40,FBXO9,FBXW11,FBXW2,FBXW4,FBXW5,FBXW7,FBXW8,FZR1,GAN,HACE1,HECTD1,HECTD2…			Class I MHC mediated antigen processing and presentation	26	0.445	6.113	ANAPC10,ANAPC11,ANAPC13,ANAPC2,ANAPC4,ANAPC5,ANAPC7,ASB13,ASB2,ASB3/GPR75-ASB3,ASB8,B2M,BCAP31,BLMH,BTBD1,BTBD6,CALR,CANX,CBLB,CDC26,CDC27,CDC34,CHUK,CTSV,CUL2,CUL3,CUL5,CYBA,ELOC,FBXL3,FBXL5,FBXL7,FBXO2,FBXO31,FBXO32,FBXO4,FBXO40,FBXO6,FBXO9,FBXW2,FBXW8,HECTD1,HERC3,HERC4,HLA-A,HSPA5,HUWE1,IKBKB,KLHL21,KLHL5,KLHL9,LNPEP,MEX3C,MGRN1,MKRN1,MRC2,MYLIP,PDIA3,PJA1,PJA2,PSMA1,PSMA2,PSMA3,PSMA5,PSMA6,P…				Class I MHC mediated antigen processing and presentation	34.6	0.584	-5.609	ANAPC1,ANAPC10,ANAPC2,ANAPC4,ANAPC5,ANAPC7,ARIH2,ASB13,ASB2,ASB3/GPR75-ASB3,ASB7,ASB8,ATG14,ATG7,BCAP31,BECN1,BLMH,BTBD1,BTBD6,BTRC,CALR,CANX,CBLB,CDC16,CDC23,CDC26,CDC27,CDC34,CHUK,CTSV,CUL1,CUL2,CUL3,CUL5,CYBA,DCAF1,DZIP3,ELOC,ERAP1,FBXL14,FBXL15,FBXL20,FBXL3,FBXL4,FBXL5,FBXL7,FBXO10,FBXO11,FBXO2,FBXO21,FBXO22,FBXO30,FBXO31,FBXO32,FBXO9,FBXW11,FBXW2,FBXW4,FBXW5,FBXW7,FBXW8,FZR1,GAN,HACE1,HECTD1…
4	Estrogen Receptor Signaling	30.7	0.553	4.831	ADCY3,ADCY5,ADCY6,ADCY9,AKT1,AKT2,AKT3,ATF2,ATF4,BAD,BCL2,CACNA1C,CACNA1D,CACNA2D1,CACNB2,CACNB3,CARM1,CCNC,CDK8,CDKN1A,CFL1,CFL2,CREB1,CREB3,CREB3L1,CREB3L2,CREB5,CREBBP,CTBP2,DDX5,DLG4,EGFR,EIF2B1,EIF2B2,EIF2B3,EIF2B4,EIF2B5,EP300,FBXO32,FOS,FOXO1,FOXO3,FOXO4,GNA11,GNA12,GNA13,GNAI2,GNAI3,GNAQ,GNAS,GNB1,GNB2,GNB5,GNG10,GNG11,GNG12,GNG5,GPS2,GRB2,GSK3A,GSK3B,GUCY1A1,HDAC3,HES1,HIF1A,HNRNPD,HSP90…			Estrogen Receptor Signaling	32.5	0.465	3.116	ADCY3,ADCY6,ADCY9,AKT1,AKT2,ATF2,ATF4,BAD,BCL2,CACNA1C,CACNA2D1,CACNA2D3,CACNB2,CACNB3,CAV1,CCNC,CDK8,CDKN1A,CFL1,CFL2,CREB1,CREB3,CREB3L1,CREB3L2,CREBBP,CTBP1,CTBP2,CYC1,DDX5,EGFR,EIF2B1,EIF2B2,EIF2B4,EIF4E,EIF4EBP1,EP300,FBXO32,FOS,FOXO1,GNA11,GNA13,GNAI1,GNAI3,GNAO1,GNAQ,GNAS,GNB1,GNB2,GNB4,GNG10,GNG11,GNG12,GNG5,GPS2,GSK3A,GUCY1A1,GUCY1B1,HDAC3,HES1,HIF1A,HNRNPD,HRAS,HSP90AA1,HSP90AB1,HSP90B1…				Estrogen Receptor Signaling	33.3	0.565	-5.367	ADCY3,ADCY5,ADCY6,ADCY7,ADCY9,AKT1,AKT2,AKT3,ATF2,ATF4,BCL2,CACNA1C,CACNA1D,CACNA2D1,CACNA2D3,CACNB2,CACNB3,CARM1,CAV1,CCNC,CDK8,CDKN1A,CFL1,CFL2,CREB1,CREB3L1,CREB3L2,CREB5,CREBBP,CTBP1,CTBP2,DDX5,DLG4,EGFR,EIF2B2,EIF2B3,EIF2B4,EIF2B5,EIF4E,EP300,FBXO32,FOS,FOXO1,FOXO3,FOXO4,GNA11,GNA12,GNA13,GNAI1,GNAI2,GNAI3,GNAO1,GNAQ,GNAS,GNB1,GNB2,GNB4,GNB5,GNG10,GNG11,GNG12,GNG5,GPS2,GRB2,GSK3A,GSK3B,GUCY1…
5	Deubiquitination	30.1	0.62	5.718	ABRAXAS2,ACTB,ACTL6A,ACTR8,ADRM1,APC,ASXL1,ASXL2,ATXN3,ATXN7,AXIN1,BABAM1,BABAM2,BAP1,BECN1,BIRC2,BIRC3,BRCC3,CYLD,EP300,FOXK1,FOXK2,FOXO4,HCFC1,HGS,HIF1A,IDE,IKBKG,INO80,INO80B,INO80C,INO80D,KAT2B,KEAP1,MAT2B,MAVS,MBD5,MBD6,MCRS1,MDM2,MDM4,MUL1,MYC,MYSM1,NEDD8,NFKBIA,NFRKB,OGT,OTUD7B,POLB,PRKN,PSMA1,PSMA2,PSMA3,PSMA5,PSMA6,PSMA7,PSMB1,PSMB2,PSMB3,PSMB6,PSMB7,PSMC1,PSMC2,PSMC3,PSMC4,PSMC5,PSMC6,P…			Deubiquitination	15	0.418	7.246	ACTB,ACTL6A,ACTR8,ADRM1,AR,AXIN1,BABAM2,BIRC2,EP300,FKBP8,FOXK2,HIF1A,INO80,INO80B,INO80E,JOSD2,KAT2B,MAT2B,MCRS1,MDM2,MUL1,MYSM1,NEDD8,NFKBIA,OGT,PSMA1,PSMA2,PSMA3,PSMA5,PSMA6,PSMA7,PSMB1,PSMB2,PSMB3,PSMB4,PSMB5,PSMB6,PSMB7,PSMC1,PSMC2,PSMC4,PSMC5,PSMC6,PSMD1,PSMD10,PSMD11,PSMD12,PSMD13,PSMD14,PSMD3,PSMD4,PSMD5,PSMD6,PSMD7,PSMD8,PSMD9,PSME1,PSME2,PSME4,PSMF1,PTRH2,RAD23A,RAD23B,RCE1,RHOA,RIPK2,R…				Deubiquitination	24.1	0.582	-3.476	ABRAXAS2,ACTB,ACTL6A,ACTR8,APC,AR,ASXL1,ASXL2,ATXN3,ATXN7,AXIN1,BABAM1,BABAM2,BAP1,BECN1,BIRC2,BIRC3,BRCC3,CYLD,EP300,FKBP8,FOXK1,FOXK2,FOXO4,HCFC1,HGS,HIF1A,IDE,IKBKG,INO80,INO80C,INO80D,INO80E,KAT2B,KEAP1,MAVS,MBD5,MBD6,MCRS1,MDM2,MDM4,MUL1,MYC,MYSM1,NEDD8,NFKBIA,NFRKB,OGT,OTUD7B,POLB,PRKN,PSMA1,PSMA2,PSMA3,PSMA5,PSMB1,PSMB10,PSMB2,PSMB3,PSMB6,PSMB7,PSMC1,PSMC2,PSMC4,PSMD1,PSMD10,PSMD11,PSMD12,…
6	mTOR Signaling	29.5	0.654	2.619	AKT1,AKT1S1,AKT2,AKT3,ATG13,DDIT4,EIF3A,EIF3B,EIF3C,EIF3D,EIF3E,EIF3H,EIF3J,EIF3K,EIF3L,EIF3M,EIF4A1,EIF4A2,EIF4A3,EIF4B,EIF4EBP2,EIF4G1,EIF4G2,EIF4G3,FAU,FKBP1A,FNBP1,HIF1A,HMOX1,INSR,IRS1,KRAS,MAPK1,MAPK3,MAPKAP1,MRAS,MTOR,NAPEPLD,NRAS,PDGFC,PDPK1,PIK3C2A,PIK3C2B,PIK3C3,PIK3CA,PIK3CB,PIK3R1,PIK3R2,PIK3R3,PIK3R4,PLD1,PPP2CA,PPP2CB,PPP2R1A,PPP2R1B,PPP2R2A,PPP2R2D,PPP2R3A,PPP2R5A,PPP2R5B,PPP2R5D,P…			mTOR Signaling	21.7	0.5	2.673	AKT1,AKT1S1,AKT2,Cdc42,DDIT4,EIF3A,EIF3B,EIF3C,EIF3E,EIF3F,EIF3H,EIF3I,EIF3J,EIF3K,EIF3M,EIF4A1,EIF4A2,EIF4A3,EIF4E,EIF4EBP1,EIF4EBP2,EIF4G2,EIF4G3,FAU,FKBP1A,FNBP1,HIF1A,HRAS,INSR,IRS1,KRAS,MAPK3,MAPKAP1,MRAS,MTOR,NAPEPLD,NRAS,PDGFC,PIK3C2A,PIK3CB,PIK3R1,PIK3R3,PLD1,PPP2CA,PPP2R1A,PPP2R2D,PPP2R3A,PPP2R5A,PRKAA1,PRKAA2,PRKAB2,PRKAG1,PRKCA,PRKCD,PRKCE,PRKD1,RAC3,RALA,RALB,RAP1A,RAP1B,RHEB,RHOA,RHO…				mTOR Signaling	26.1	0.631	-2.683	AKT1,AKT1S1,AKT2,AKT3,ATG13,DDIT4,EIF3A,EIF3B,EIF3C,EIF3D,EIF3F,EIF3G,EIF3H,EIF3K,EIF3L,EIF3M,EIF4A1,EIF4A2,EIF4A3,EIF4B,EIF4E,EIF4EBP2,EIF4G1,EIF4G2,EIF4G3,FAU,FKBP1A,FNBP1,HIF1A,HMOX1,INSR,IRS1,KRAS,MAPK1,MAPK3,MAPKAP1,MRAS,MTOR,NAPEPLD,NRAS,PDGFC,PDPK1,PIK3C2A,PIK3C2B,PIK3C3,PIK3CA,PIK3CB,PIK3R1,PIK3R2,PIK3R3,PIK3R4,PLD1,PPP2CA,PPP2CB,PPP2R1A,PPP2R1B,PPP2R2A,PPP2R2D,PPP2R3A,PPP2R5A,PPP2R5B,PPP…
7	Regulation of eIF4 and p70S6K Signaling	29.5	0.685	2.429	AGO1,AGO2,AGO3,AKT1,AKT2,AKT3,EIF1AX,EIF1AY,EIF2A,EIF2B1,EIF2B2,EIF2B3,EIF2B4,EIF2B5,EIF2S1,EIF2S2,EIF2S3,EIF3A,EIF3B,EIF3C,EIF3D,EIF3E,EIF3H,EIF3J,EIF3K,EIF3L,EIF3M,EIF4A1,EIF4A2,EIF4A3,EIF4E3,EIF4EBP2,EIF4G1,EIF4G2,EIF4G3,ELP5,FAU,GRB2,IRS1,ITGA1,ITGA3,ITGA5,ITGA7,ITGA8,ITGA9,ITGAV,ITGB1,ITGB3,ITGB5,ITGB8,KRAS,MAP2K1,MAP2K2,MAPK1,MAPK14,MAPK3,MRAS,MTOR,NRAS,PABPC1,PAIP1,PAIP2,PDPK1,PIK3C2A,PIK3…			Regulation of eIF4 and p70S6K Signaling	21.2	0.522	4.017	AKT1,AKT2,EIF1AY,EIF2A,EIF2B1,EIF2B2,EIF2B4,EIF2S1,EIF2S2,EIF2S3,EIF3A,EIF3B,EIF3C,EIF3E,EIF3F,EIF3H,EIF3I,EIF3J,EIF3K,EIF3M,EIF4A1,EIF4A2,EIF4A3,EIF4E,EIF4E3,EIF4EBP1,EIF4EBP2,EIF4G2,EIF4G3,FAU,HRAS,IRS1,ITGA1,ITGA5,ITGA7,ITGA9,ITGAV,ITGB1,ITGB3,ITGB5,KRAS,MAP2K1,MAP2K2,MAPK14,MAPK3,MRAS,MTOR,NRAS,PABPC1,PAIP1,PAIP2,PIK3C2A,PIK3CB,PIK3R1,PIK3R3,PPP2CA,PPP2R1A,PPP2R2D,PPP2R3A,PPP2R5A,RAF1,RALA,RA…				Regulation of eIF4 and p70S6K Signaling	27.3	0.668	-2.021	AGO1,AGO2,AGO3,AKT1,AKT2,AKT3,EIF1AX,EIF1AY,EIF2A,EIF2B2,EIF2B3,EIF2B4,EIF2B5,EIF2S1,EIF2S2,EIF2S3,EIF3A,EIF3B,EIF3C,EIF3D,EIF3F,EIF3G,EIF3H,EIF3K,EIF3L,EIF3M,EIF4A1,EIF4A2,EIF4A3,EIF4E,EIF4E3,EIF4EBP2,EIF4G1,EIF4G2,EIF4G3,ELP5,FAU,GRB2,IRS1,ITGA1,ITGA3,ITGA5,ITGA7,ITGA8,ITGA9,ITGAV,ITGB1,ITGB3,ITGB5,ITGB8,KRAS,MAP2K1,MAP2K2,MAPK1,MAPK14,MAPK3,MRAS,MTOR,NRAS,PABPC1,PAIP1,PDPK1,PIK3C2A,PIK3C2B,PIK…
8	HER-2 Signaling in Breast Cancer	25.6	0.617	4.636	AHCTF1,AKT1,AKT1S1,AKT2,AKT3,ARAF,ARF1,Arf2,ARF3,ARF4,ARF5,ARF6,BAD,BCL2L11,BRAF,CASP3,CDK4,CDKN1A,CDKN1B,CHUK,COX11,COX17,COX5A,COX6A1,COX6B1,Cox6c,COX7A2,COX7A2L,COX7B,COX8A,CYB5A,EGFR,ELF1,ELF2,ELF4,ELK1,ELK3,ETS1,ETS2,FOS,FOXO1,FOXO3,FRK,GLE1,GRB2,GSK3A,GSK3B,HBEGF,IKBKB,IKBKG,ITGB1,ITGB3,ITGB5,ITGB8,JUN,KPNB1,KRAS,MAP2K1,MAP2K2,MAPK1,MAPK3,MDM2,MRAS,MTOR,MYC,NFKB1,NFKB2,NFKBIA,NFKBIB,NRAS,NU…			HER-2 Signaling in Breast Cancer	10.8	0.396	2.111	AHCTF1,AKT1,AKT1S1,AKT2,ARAF,ARF1,Arf2,ARF3,ARF4,ARF5,ARF6,BAD,CDK4,CDKN1A,CHUK,COX11,COX17,COX4I1,COX4I2,COX5A,COX6A1,COX6B1,Cox6c,COX7A2,COX7A2L,COX7B,COX8A,EGFR,ELF1,ELK3,ETS2,FOS,FOXO1,GSK3A,HBEGF,HRAS,IKBKB,ITGB1,ITGB3,ITGB5,JUN,KRAS,MAP2K1,MAP2K2,MAPK3,MDM2,MRAS,MTOR,NFKBIA,NFKBIB,NRAS,NUP153,NUP54,NUP88,NUP93,PARD3,PARD6A,PIK3C2A,PIK3CB,PIK3R1,PIK3R3,PRKCA,PRKCD,PRKCE,PRKD1,RAE1,RAF1,RALA,…				HER-2 Signaling in Breast Cancer	22	0.59	-4.61	AHCTF1,AKT1,AKT1S1,AKT2,AKT3,ARAF,Arf2,ARF3,ARF4,ARF6,BCL2L11,BRAF,CASP3,CDK4,CDKN1A,CDKN1B,CHUK,COX11,COX17,COX5A,COX6B1,Cox6c,COX7A2,COX7A2L,COX7B,COX8A,CYB5A,EGFR,ELF1,ELF2,ELF4,ELK1,ELK3,ETS1,ETS2,FOS,FOXO1,FOXO3,FRK,GLE1,GRB2,GSK3A,GSK3B,HBEGF,IKBKB,IKBKG,ITGB1,ITGB3,ITGB5,ITGB8,JUN,KPNB1,KRAS,MAP2K1,MAP2K2,MAPK1,MAPK3,MDM2,MRAS,MTOR,MYC,NFKB1,NFKB2,NFKBIA,NFKBIB,NRAS,NUP153,NUP155,NUP160,NU…
9	Senescence Pathway	25.1	0.569	6.872	ACVR1,ACVR1B,ACVR2A,AKT1,AKT2,AKT3,ANAPC1,ANAPC11,ANAPC13,ANAPC2,ANAPC4,ANAPC5,ANAPC7,ARAF,ASXL1,ASXL2,ATF3,ATM,ATR,BHLHE40,BMPR2,BRAF,CACNA1C,CACNA1D,CACNA2D1,CACNB2,CACNB3,Calm1 (includes others),CAPN1,CAPN2,CAPN7,CAT,CBX7,CCND2,CCND3,CDC16,CDC23,CDC27,CDK4,CDK6,CDKN1A,CDKN1B,CEBPB,CHP1,CHUK,CREBBP,DLAT,DLD,DMTF1,E2F3,E2F5,E2F6,EED,ELF1,ELF2,ELF4,ELK3,EP300,EP400,ETS1,ETS2,EZH2,FOXO3,FOXO4,FZR1…			Senescence Pathway	9.56	0.358	3.545	ACVR1,AKT1,AKT2,ANAPC10,ANAPC11,ANAPC13,ANAPC2,ANAPC4,ANAPC5,ANAPC7,ARAF,BMPR2,CACNA1C,CACNA2D1,CACNA2D3,CACNB2,CACNB3,Calm1 (includes others),CAPN2,CAPNS1,CBX7,CCND2,CDC26,CDC27,CDK4,CDK6,CDKN1A,CEBPB,CHUK,CREBBP,DLD,E2F4,E2F5,E2F6,EED,EIF4E,EIF4EBP1,ELF1,ELK3,EP300,EP400,ETS2,GADD45A,GADD45B,HBP1,HIPK2,HRAS,IKBKB,ING1,ITSN2,JUN,KAT2B,KRAS,MAP2K1,MAP2K2,MAP2K3,MAP2K4,MAP2K7,MAPK14,MAPK3,MAPK6,MA…				Senescence Pathway	27.3	0.582	-4.804	ACVR1,ACVR1B,ACVR2A,AKT1,AKT2,AKT3,ANAPC1,ANAPC10,ANAPC2,ANAPC4,ANAPC5,ANAPC7,ARAF,ASXL1,ASXL2,ATF3,ATM,ATR,BHLHE40,BMPR2,BRAF,CACNA1C,CACNA1D,CACNA2D1,CACNA2D3,CACNB2,CACNB3,Calm1 (includes others),CAPN1,CAPN2,CAPN7,CAPNS1,CAT,CBX7,CCND2,CCND3,CDC16,CDC23,CDC26,CDC27,CDK4,CDK6,CDKN1A,CDKN1B,CEBPB,CHP1,CHUK,CREBBP,DLAT,DLD,DMTF1,E2F3,E2F5,E2F6,EED,EIF4E,ELF1,ELF2,ELF4,ELK3,EP300,EP400,ETS1,ETS2,E…
10	Protein Sorting Signaling Pathway	25	0.657	4.16	ADCY3,ADCY5,ADCY6,ADCY9,AP1B1,AP1G1,AP1M1,AP1S2,AP3B1,AP3D1,AP3M1,AP3S1,AP3S2,AP4E1,AP4S1,ARCN1,ARF1,ARFGAP1,ARFGEF1,ARFGEF2,CLINT1,CLTA,CLTB,CLTC,COPA,COPB1,COPB2,COPE,COPG1,COPG2,COPZ1,COPZ2,DNM2,FRK,GCC1,GGA2,GNAQ,GNAS,GOLGA1,GOLGA4,GUCY1A1,HMOX1,IGF2R,KDELR1,KDELR2,LMAN1,M6PR,MIA3,NAPEPLD,PI4K2A,PI4KB,PLD1,PREB,PRKACA,PRKACB,PRKAG1,PRKAG2,PRKAR1A,PRKAR2A,PRKD1,RAB11A,RAB11B,RER1,SACM1L,SAR1A,…			Protein Sorting Signaling Pathway	13.6	0.455	2.333	ADCY3,ADCY6,ADCY9,AP1M1,AP1S1,AP1S2,AP3B1,AP3D1,AP3M1,AP3S1,AP4S1,ARF1,CLINT1,CLTA,CLTB,CLTC,COPA,COPB1,COPE,CTBP1,DNM2,GGA2,GNAQ,GNAS,GUCY1A1,GUCY1B1,KDELR2,KDELR3,LMAN1,M6PR,MIA3,NAPEPLD,PI4K2A,PLD1,PLPP2,PLPP3,PRKACB,PRKAG1,PRKAR1A,PRKAR2A,PRKD1,RAB11A,RER1,SACM1L,SAR1A,SCARB2,SEC13,SEC23A,SEC24A,SEC24C,SEC24D,SEC31A,SERPINH1,SNX10,SNX13,SNX17,SNX18,SNX2,SNX24,SNX3,SNX32,SNX4,SNX6,SNX7,SORT1,S…				Protein Sorting Signaling Pathway	19.1	0.607	-5.581	ADCY3,ADCY5,ADCY6,ADCY7,ADCY9,AP1B1,AP1G1,AP1M1,AP1S1,AP3B1,AP3D1,AP3M1,AP3S2,AP4E1,AP4S1,ARCN1,ARFGAP1,ARFGEF1,ARFGEF2,CLINT1,CLTA,CLTC,COPA,COPB1,COPB2,COPG1,COPG2,COPZ1,CTBP1,DNM2,FRK,GCC1,GGA1,GGA2,GNAQ,GNAS,GOLGA1,GOLGA4,GUCY1A1,GUCY1B1,HMOX1,IGF2R,KDELR2,KDELR3,LMAN1,M6PR,MIA3,NAPEPLD,PI4K2A,PI4KB,PLD1,PREB,PRKACA,PRKACB,PRKAG1,PRKAG2,PRKAR2A,RAB11B,RER1,SACM1L,SAR1A,SEC13,SEC23A,SEC23B,SEC…
11	Integrin Signaling	24.7	0.623	4.345	ABL1,ACTA2,ACTB,ACTG1,ACTG2,ACTN1,ACTN2,ACTN4,ACTR2,ACTR3,AKT1,AKT2,AKT3,ARF1,Arf2,ARF3,ARF4,ARF5,ARF6,ARHGAP5,ARHGEF7,ARPC1B,ARPC2,ARPC3,ARPC4,ARPC5,ARPC5L,ASAP1,BCAR1,BRAF,CAPN1,CAPN2,CAPN7,CRK,CRKL,CTTN,DOCK1,FNBP1,GIT1,GRB2,GSK3B,ILK,ITGA1,ITGA3,ITGA5,ITGA7,ITGA8,ITGA9,ITGAV,ITGB1,ITGB3,ITGB5,ITGB8,KRAS,LIMS1,MAP2K1,MAP2K2,MAP2K4,MAPK1,MAPK3,MAPK8,MPRIP,MRAS,MYL12A,MYL12B,MYL9,MYLK,NCK1,NEDD9…			Integrin Signaling	19.7	0.486	2.65	ACTA2,ACTB,ACTG1,ACTG2,ACTN1,ACTN2,ACTN4,ACTR2,ACTR3,AKT1,AKT2,ARF1,Arf2,ARF3,ARF4,ARF5,ARF6,ARHGAP5,ARHGEF7,ARPC1A,ARPC3,ARPC4,ARPC5L,ASAP1,CAPN2,CAPNS1,CAV1,Cdc42,CRK,DOCK1,FNBP1,GSN,HRAS,ILK,ILKAP,ITGA1,ITGA5,ITGA7,ITGA9,ITGAV,ITGB1,ITGB3,ITGB5,KRAS,LIMS1,MAP2K1,MAP2K2,MAP2K4,MAPK3,MAPK8,MPRIP,MRAS,MYL12A,MYL12B,MYL9,NCK1,NRAS,PAK2,PARVA,PFN1,PFN2,PIK3C2A,PIK3CB,PIK3R1,PIK3R3,PIKFYVE,PPP1CB,PP…				Integrin Signaling	21.1	0.594	-4.87	ABL1,ACTA2,ACTB,ACTG1,ACTG2,ACTN1,ACTN2,ACTN4,ACTR3,AKT1,AKT2,AKT3,Arf2,ARF3,ARF4,ARF6,ARHGAP5,ARHGEF7,ARPC1A,ARPC2,ARPC3,ARPC4,ARPC5,ASAP1,BCAR1,BCAR3,BRAF,CAPN1,CAPN2,CAPN7,CAPNS1,CAV1,CRK,CRKL,CTTN,DOCK1,FNBP1,GIT1,GRB2,GSK3B,ILK,ITGA1,ITGA3,ITGA5,ITGA7,ITGA8,ITGA9,ITGAV,ITGB1,ITGB3,ITGB5,ITGB8,KRAS,LIMS1,MAP2K1,MAP2K2,MAP2K4,MAPK1,MAPK3,MAPK8,MPRIP,MRAS,MYL12A,MYL12B,MYL9,MYLK,NCK1,NCK2,NEDD9…
12	Hepatic Fibrosis Signaling Pathway	24.3	0.518	5.573	ACTA2,ACVR1,ACVR1B,ACVR2A,AKT1,AKT2,AKT3,APC,ARAF,ATF2,ATF4,AXIN1,BAMBI,BCL2,BMPR2,BRAF,CACNA1C,CACNA1D,CACNA2D1,CACNB2,CACNB3,Calm1 (includes others),CASP3,CCDC88A,CCN2,CDKN1B,CEBPB,CHUK,COL1A1,COL1A2,COL3A1,CREB1,CREB3,CREB3L1,CREB3L2,CREB5,CREBBP,CSNK1A1,CSNK1D,CSNK1E,CSNK1G1,CSNK1G3,CTNNB1,DVL3,ELK1,EZH2,FGF2,FGFR1,FLT1,FNBP1,FOS,FOXO1,FOXO4,FTH1,FZD2,FZD5,FZD6,FZD7,FZD8,GLI2,GLI3,GLIS2,GNAI2…			Hepatic Fibrosis Signaling Pathway	15.6	0.374	2.688	ACTA2,ACVR1,AKT1,AKT2,ARAF,ATF2,ATF4,AXIN1,BAMBI,BCL2,BMPR2,CACNA1C,CACNA2D1,CACNA2D3,CACNB2,CACNB3,Calm1 (includes others),CCN2,Cdc42,CEBPB,CHUK,COL1A1,COL1A2,COL3A1,CREB1,CREB3,CREB3L1,CREB3L2,CREBBP,CSNK1A1,CSNK1D,CSNK1E,CSNK1G3,CTNNB1,DVL1,DVL3,FGF2,FGFR1,FLT1,FNBP1,FOS,FOXO1,FTH1,FTL,FZD1,FZD2,FZD7,FZD8,GLI3,GLIS2,GNAI1,GNAI3,HIF1A,HRAS,IKBKB,IRAK1,IRAK2,IRS2,ITGA1,ITGA5,ITGA7,ITGA9,ITGAV,IT…				Hepatic Fibrosis Signaling Pathway	22.1	0.506	-5.068	ACTA2,ACVR1,ACVR1B,ACVR2A,AKT1,AKT2,AKT3,APC,ARAF,ATF2,ATF4,AXIN1,BAMBI,BCL2,BMPR2,BRAF,CACNA1C,CACNA1D,CACNA2D1,CACNA2D3,CACNB2,CACNB3,Calm1 (includes others),CASP3,CCDC88A,CCN2,CDKN1B,CEBPB,CHUK,COL1A1,COL1A2,COL3A1,CREB1,CREB3L1,CREB3L2,CREB5,CREBBP,CSNK1A1,CSNK1D,CSNK1E,CSNK1G1,CSNK1G2,CSNK1G3,CTNNB1,DVL1,DVL3,ELK1,EZH2,FGFR1,FLT1,FNBP1,FOS,FOXO1,FOXO4,FTH1,FTL,FZD1,FZD2,FZD5,FZD6,FZD7,FZD8,G…
13	Intra-Golgi and retrograde Golgi-to-ER traffic	23.5	0.621	4.811	ACTR1A,AGPAT3,ARCN1,ARF1,ARF3,ARF4,ARF5,ARFGAP1,ARFGAP2,ARFGAP3,ARFIP2,ARFRP1,BET1L,BICD1,BICD2,CAPZA1,CAPZA2,CAPZB,COG2,COG3,COG4,COG5,COG6,COG7,COPA,COPB1,COPB2,COPE,COPG1,COPG2,COPZ1,COPZ2,CYTH1,CYTH2,CYTH3,DCTN1,DCTN2,DCTN3,DCTN4,DCTN5,DYNC1H1,DYNC1LI1,DYNC1LI2,DYNLL1,DYNLL2,GALNT1,GALNT2,GBF1,GCC1,GCC2,GOLGA1,GOLGA4,GOLGA5,GOLIM4,GOSR1,GOSR2,IGF2R,KDELR1,KDELR2,KIF13B,KIF16B,KIF1A,KIF1B,KIF1…			Intra-Golgi and retrograde Golgi-to-ER traffic	10.9	0.409	2.744	ACTR10,ARF1,ARF3,ARF4,ARF5,ARFGAP2,ARFGAP3,ARFIP2,ARFRP1,ARL1,BET1L,CAPZA2,CAPZB,COG5,COG6,COG8,COPA,COPB1,COPE,CYTH2,DCTN1,DCTN2,DCTN3,DCTN6,DYNC1H1,DYNC1LI1,DYNC1LI2,DYNLL1,GALNT2,GBF1,GCC2,GOLGA5,GOLIM4,KDELR2,KDELR3,KIF13B,KIF16B,KIF1A,KIF1C,KIF26B,KIF2A,KIF3A,KIF5B,KIFAP3,KLC3,M6PR,MAN1A2,MAN2A1,NAA30,NAA38,NAPA,NBAS,PAFAH1B2,PLA2G4A,RAB18,RAB1A,RAB43,RAB6A,RAB6B,RAB9A,RABEPK,RHOBTB3,RIC1,SC…				Intra-Golgi and retrograde Golgi-to-ER traffic	19.3	0.586	-5.592	ACTR1A,AGPAT3,ARCN1,ARF3,ARF4,ARFGAP1,ARFGAP2,ARFGAP3,ARFIP2,ARL1,BET1L,BICD2,CAPZA1,CAPZA2,COG2,COG3,COG4,COG5,COG6,COG7,COG8,COPA,COPB1,COPB2,COPG1,COPG2,COPZ1,CYTH1,CYTH2,DCTN1,DCTN2,DCTN5,DYNC1H1,DYNC1LI2,DYNLL1,DYNLL2,GALNT1,GALNT2,GBF1,GCC1,GCC2,GOLGA1,GOLGA4,GOLGA5,GOLIM4,GOSR1,GOSR2,IGF2R,KDELR2,KDELR3,KIF13B,KIF16B,KIF1A,KIF1B,KIF1C,KIF26B,KIF2A,KIF3A,KIF3C,KIF5B,KIFAP3,KLC1,KLC2,KLC3,M6…
14	Insulin Receptor Signaling	21.2	0.671	2.741	ACLY,AKT1,AKT2,AKT3,BAD,CBL,CRK,CRKL,EIF2B1,EIF2B2,EIF2B3,EIF2B4,EIF2B5,EPM2A,FOXO1,FOXO3,FOXO4,GAB1,GRB10,GRB2,GSK3A,GSK3B,INPP5B,INPP5F,INPP5K,INPPL1,INSR,IRS1,IRS2,JAK1,JAK2,KRAS,MAP2K1,MAP2K2,MAPK1,MAPK3,MAPK8,MRAS,MTOR,NCK1,NRAS,OCRL,PDPK1,PIK3C2A,PIK3C2B,PIK3C3,PIK3CA,PIK3CB,PIK3R1,PIK3R2,PIK3R3,PIK3R4,PPP1CB,Ppp1cc,PPP1R10,PPP1R11,PPP1R12A,PPP1R14A,PPP1R14C,PPP1R7,PRKACA,PRKACB,PRKAG1,PRKA…			Insulin Receptor Signaling	12.1	0.471	3.302	AKT1,AKT2,BAD,CRK,EIF2B1,EIF2B2,EIF2B4,EIF4E,EIF4EBP1,FOXO1,GAB1,GRB10,GSK3A,HRAS,INPP5K,INSR,IRS1,IRS2,JAK1,JAK2,KRAS,MAP2K1,MAP2K2,MAPK3,MAPK8,MRAS,MTOR,NCK1,NRAS,PIK3C2A,PIK3CB,PIK3R1,PIK3R3,PPP1CB,Ppp1cc,PPP1R10,PPP1R11,PPP1R12A,PPP1R14A,PPP1R14B,PPP1R14C,PPP1R3C,PPP1R7,PRKACB,PRKAG1,PRKAR1A,PRKAR2A,PTPN1,RAF1,RALA,RALB,RAP1A,RAP1B,RHOQ,RPS6KB1,RPS6KB2,RPTOR,RRAS,SGK1,SLC2A4,SOCS3,SOS2,STX4,T…				Insulin Receptor Signaling	21.2	0.671	-2.985	ACLY,AKT1,AKT2,AKT3,CBL,CRK,CRKL,EIF2B2,EIF2B3,EIF2B4,EIF2B5,EIF4E,EPM2A,FOXO1,FOXO3,FOXO4,GAB1,GRB10,GRB2,GSK3A,GSK3B,INPP5B,INPP5F,INPP5K,INPPL1,INSR,IRS1,IRS2,JAK1,JAK2,KRAS,MAP2K1,MAP2K2,MAPK1,MAPK3,MAPK8,MRAS,MTOR,NCK1,NRAS,OCRL,PDPK1,PIK3C2A,PIK3C2B,PIK3C3,PIK3CA,PIK3CB,PIK3R1,PIK3R2,PIK3R3,PIK3R4,PPP1CA,PPP1CB,Ppp1cc,PPP1R10,PPP1R12A,PPP1R14A,PPP1R14B,PPP1R14C,PPP1R7,PRKACA,PRKACB,PRKAG1,P…
15	Neddylation	20.9	0.569	5.24	AMER1,ANKRD9,ASB13,ASB2,ASB3/GPR75-ASB3,ASB7,ASB8,BTBD1,BTBD6,BTRC,CAND1,CDKN1A,COMMD10,COMMD4,COMMD7,COMMD9,COP1,Cops2,COPS3,COPS5,CUL1,CUL2,CUL3,CUL4A,CUL4B,CUL5,CUL9,DCAF10,DCAF11,DCAF13,DCAF5,DCAF6,DCAF7,DCAF8,DCUN1D2,DCUN1D3,DCUN1D4,DDA1,DDB1,DPP3,ELOC,FBXL14,FBXL15,FBXL20,FBXL3,FBXL4,FBXL5,FBXL7,FBXO10,FBXO11,FBXO2,FBXO21,FBXO22,FBXO30,FBXO31,FBXO32,FBXO40,FBXO9,FBXW11,FBXW2,FBXW4,FBXW5,FBX…			Neddylation	20.2	0.467	7.74	ANKRD9,ASB13,ASB2,ASB3/GPR75-ASB3,ASB8,BTBD1,BTBD6,CDKN1A,COMMD1,COMMD2,COMMD3,COMMD4,COMMD8,COMMD9,COP1,Cops2,COPS7A,COPS8,CUL2,CUL3,CUL4A,CUL4B,CUL5,DCAF10,DCAF13,DCAF6,DCAF7,DCUN1D1,DCUN1D3,DCUN1D5,DDA1,DPP3,ELOC,EPAS1,FBXL3,FBXL5,FBXL7,FBXO2,FBXO31,FBXO32,FBXO4,FBXO40,FBXO6,FBXO9,FBXW2,FBXW8,FEM1B,GPS1,HIF1A,KLHL21,KLHL5,KLHL9,MUL1,NAE1,NEDD8,NEURL2,NPLOC4,PSMA1,PSMA2,PSMA3,PSMA5,PSMA6,PSMA7,…				Neddylation	21.4	0.573	-2.611	AMER1,ANKRD9,ASB13,ASB2,ASB3/GPR75-ASB3,ASB7,ASB8,BTBD1,BTBD6,BTRC,CAND1,CDKN1A,COMMD1,COMMD10,COMMD4,COMMD7,COMMD8,COMMD9,COP1,COPS3,COPS4,COPS5,COPS7A,COPS8,CUL1,CUL2,CUL3,CUL4A,CUL4B,CUL5,CUL9,DCAF10,DCAF11,DCAF13,DCAF5,DCAF6,DCAF7,DCAF8,DCUN1D1,DCUN1D2,DCUN1D3,DCUN1D4,DCUN1D5,DDB1,DPP3,ELOC,FBXL14,FBXL15,FBXL20,FBXL3,FBXL4,FBXL5,FBXL7,FBXO10,FBXO11,FBXO2,FBXO21,FBXO22,FBXO30,FBXO31,FBXO32,FBX…
16	Prostate Cancer Signaling	20.8	0.711	3.13	ABL1,AKT1,AKT2,AKT3,ATF2,ATF4,BAD,BCL2,CDKN1A,CDKN1B,CHUK,CREB1,CREB3,CREB3L1,CREB3L2,CREB5,CREBBP,CTNNB1,E2F3,E2F5,E2F6,FOXO1,GRB2,GSK3B,HDAC1,HDAC11,HDAC2,HDAC3,HDAC4,HDAC5,HDAC6,HDAC7,HDAC8,HDAC9,HSP90AA1,HSP90AB1,HSP90B1,KRAS,MAP2K1,MAP2K2,MAPK1,MAPK3,MDM2,MRAS,MTOR,NFKB1,NFKB2,NFKBIA,NFKBIB,NRAS,PA2G4,PDPK1,PIK3C2A,PIK3C2B,PIK3C3,PIK3CA,PIK3CB,PIK3R1,PIK3R2,PIK3R3,PIK3R4,PTEN,RAF1,RALA,RALB,…			Prostate Cancer Signaling	12.5	0.509	2.626	AKT1,AKT2,AR,ATF2,ATF4,BAD,BCL2,CDKN1A,CHUK,CREB1,CREB3,CREB3L1,CREB3L2,CREBBP,CTNNB1,E2F4,E2F5,E2F6,FOXO1,GSTP1,HDAC2,HDAC3,HDAC4,HDAC5,HDAC7,HDAC8,HDAC9,HRAS,HSP90AA1,HSP90AB1,HSP90B1,KRAS,MAP2K1,MAP2K2,MAPK3,MDM2,MRAS,MTOR,NFKBIA,NFKBIB,NRAS,PA2G4,PIK3C2A,PIK3CB,PIK3R1,PIK3R3,RAF1,RALA,RALB,RAP1A,RAP1B,RBL2,RELB,RRAS,SIN3A,SOS2,TFDP1,TP53				Prostate Cancer Signaling	20	0.702	-2.588	ABL1,AKT1,AKT2,AKT3,AR,ATF2,ATF4,BCL2,CDKN1A,CDKN1B,CHUK,CREB1,CREB3L1,CREB3L2,CREB5,CREBBP,CTNNB1,E2F3,E2F5,E2F6,FOXO1,GRB2,GSK3B,GSTP1,HDAC1,HDAC11,HDAC2,HDAC3,HDAC4,HDAC5,HDAC6,HDAC7,HDAC8,HDAC9,HSP90AA1,HSP90AB1,HSP90B1,KRAS,MAP2K1,MAP2K2,MAPK1,MAPK3,MDM2,MRAS,MTOR,NFKB1,NFKB2,NFKBIA,NFKBIB,NRAS,PA2G4,PDPK1,PIK3C2A,PIK3C2B,PIK3C3,PIK3CA,PIK3CB,PIK3R1,PIK3R2,PIK3R3,PIK3R4,PTEN,RAF1,RALA,RALB,R…
17	Pulmonary Fibrosis Idiopathic Signaling Pathway	20.6	0.528	6.732	ACTA2,ACTB,ACTG1,ACTG2,ACVR1,ACVR1B,ACVR2A,ADAM10,AEBP2,AKT1,AKT2,AKT3,ARAF,ATF2,AXL,BAX,BBC3,BCL2,BMPR2,BRAF,CCN2,COL15A1,COL18A1,COL19A1,COL1A1,COL1A2,COL3A1,COL4A1,COL4A2,COL4A3,COL4A5,COL4A6,COL5A1,COL5A2,COL6A1,COL6A2,COL6A3,CREBBP,CTNNB1,CXCL12,EED,EFNB2,EGFR,EGR1,EIF4EBP2,EP300,EZH1,EZH2,F2R,FGF2,FGFR1,FGFR2,FGFRL1,FN1,FOS,FOXO1,FOXO3,FOXO4,FZD2,FZD5,FZD6,FZD7,FZD8,GLI2,GNA12,GNA13,GRB2,GS…			Pulmonary Fibrosis Idiopathic Signaling Pathway	13.5	0.383	3.469	ACTA2,ACTB,ACTG1,ACTG2,ACVR1,ADAM10,ADAMTS1,AKT1,AKT2,ARAF,ATF2,BAX,BCL2,BMPR2,CAV1,CCN2,COL15A1,COL18A1,COL19A1,COL1A1,COL1A2,COL3A1,COL4A1,COL4A2,COL4A4,COL4A5,COL4A6,COL5A1,COL5A2,COL6A2,COL6A3,CREBBP,CTNNB1,EED,EGFR,EGR1,EIF4EBP1,EIF4EBP2,EP300,EZH1,F2R,FGF2,FGFR1,FGFRL1,FN1,FOS,FOXO1,FZD1,FZD2,FZD7,FZD8,GNA13,HES1,HRAS,IL11RA,IL6ST,ILK,ITGAV,ITGB1,JAG1,JAK2,JARID2,JUN,KRAS,LATS1,LATS2,MAP2K1…				Pulmonary Fibrosis Idiopathic Signaling Pathway	20.6	0.528	-7.351	ACTA2,ACTB,ACTG1,ACTG2,ACVR1,ACVR1B,ACVR2A,ADAM10,ADAMTS1,AEBP2,AKT1,AKT2,AKT3,ARAF,ATF2,AXL,BAX,BBC3,BCL2,BMPR2,BRAF,CAV1,CCN2,COL15A1,COL18A1,COL19A1,COL1A1,COL1A2,COL3A1,COL4A1,COL4A2,COL4A3,COL4A5,COL4A6,COL5A1,COL5A2,COL6A1,COL6A2,COL6A3,CREBBP,CTNNB1,CXCL12,EED,EFNB2,EGFR,EGR1,EIF4EBP2,EP300,EZH1,EZH2,F2R,FGFR1,FGFR2,FGFRL1,FN1,FOS,FOXO1,FOXO3,FOXO4,FZD1,FZD2,FZD5,FZD6,FZD7,FZD8,GLI2,GNA12,…
18	NGF Signaling	20.1	0.692	5.506	AKT1,AKT2,AKT3,ATF2,ATF4,BAX,CHUK,CREB1,CREB3,CREB3L1,CREB3L2,CREB5,CREBBP,CRK,ELK1,GAB1,GRB2,IKBKB,IKBKG,KRAS,MAP2K1,MAP2K2,MAP2K4,MAP3K1,MAP3K10,MAP3K14,MAP3K2,MAP3K3,MAP3K4,MAP3K5,MAP3K6,Map3k7,MAP3K8,MAPK1,MAPK3,MAPK8,MAPK9,MRAS,NFKB1,NFKB2,NRAS,PDPK1,PIK3C2A,PIK3C2B,PIK3C3,PIK3CA,PIK3CB,PIK3R1,PIK3R2,PIK3R3,PIK3R4,PLCG1,PRKCD,PTPN11,RAC1,RAF1,RALA,RALB,RAP1A,RAP1B,RAP2A,RASD1,REL,RELA,RELB,R…			NGF Signaling	9.1	0.45	4.714	AKT1,AKT2,ATF2,ATF4,BAX,CHUK,CREB1,CREB3,CREB3L1,CREB3L2,CREBBP,CRK,GAB1,HRAS,IKBKB,KRAS,MAP2K1,MAP2K2,MAP2K4,MAP3K1,MAP3K10,MAP3K2,MAP3K3,Map3k7,MAP3K8,MAPK3,MAPK8,MAPK9,MRAS,NRAS,PIK3C2A,PIK3CB,PIK3R1,PIK3R3,PRKCD,RAF1,RALA,RALB,RAP1A,RAP1B,RELB,RHOA,RHOG,ROCK1,ROCK2,RPS6KA3,RPS6KB1,RPS6KB2,RRAS,SMPD1,SMPD2,SOS2,TP53,TRIO				NGF Signaling	17.9	0.667	-4.882	AKT1,AKT2,AKT3,ATF2,ATF4,BAX,CHUK,CREB1,CREB3L1,CREB3L2,CREB5,CREBBP,CRK,ELK1,GAB1,GRB2,IKBKB,IKBKG,KRAS,MAP2K1,MAP2K2,MAP2K4,MAP3K1,MAP3K10,MAP3K14,MAP3K2,MAP3K3,MAP3K4,MAP3K5,MAP3K6,Map3k7,MAP3K8,MAPK1,MAPK3,MAPK8,MAPK9,MRAS,NFKB1,NFKB2,NRAS,PDPK1,PIK3C2A,PIK3C2B,PIK3C3,PIK3CA,PIK3CB,PIK3R1,PIK3R2,PIK3R3,PIK3R4,PLCG1,PTPN11,RAC1,RAF1,RALA,RALB,RAP1B,RAP2A,RASD1,REL,RELA,RELB,RHOA,RHOG,ROCK1,RPS…
19	Mitotic Metaphase and Anaphase	20.1	0.57	3.455	AHCTF1,ANAPC1,ANAPC11,ANAPC16,ANAPC2,ANAPC4,ANAPC5,ANAPC7,ANKLE2,B9D2,BANF1,BUB3,CC2D1B,CDC16,CDC23,CDC27,CENPC,CHMP3,CHMP4B,CHMP4C,CHMP6,CHMP7,CKAP5,CLASP1,CLASP2,CLIP1,DYNC1H1,DYNC1LI1,DYNC1LI2,DYNLL1,DYNLL2,EMD,HDAC8,IST1,ITGB3BP,KIF2A,KPNB1,LBR,LEMD3,LMNA,MAPRE1,MIS12,NDE1,NDEL1,NUDC,NUP155,NUP160,NUP188,NUP205,NUP54,NUP62,NUP93,NUP98,PAFAH1B1,PDS5A,PDS5B,POM121/POM121C,PPP2CA,PPP2CB,PPP2R1A,…			Mitotic Metaphase and Anaphase	14.7	0.43	4.677	AHCTF1,ANAPC10,ANAPC11,ANAPC16,ANAPC2,ANAPC4,ANAPC5,ANAPC7,B9D2,BANF1,BUB3,CC2D1B,CDC26,CDC27,CHMP2A,CHMP2B,CHMP3,CHMP4B,CHMP4C,CHMP7,CKAP5,CLASP1,CLASP2,CLIP1,DYNC1H1,DYNC1LI1,DYNC1LI2,DYNLL1,EMD,HDAC8,IST1,KIF2A,LEMD2,LMNA,MAPRE1,NUP54,NUP93,PPP2CA,PPP2R1A,PPP2R5A,PSMA1,PSMA2,PSMA3,PSMA5,PSMA6,PSMA7,PSMB1,PSMB2,PSMB3,PSMB4,PSMB5,PSMB6,PSMB7,PSMC1,PSMC2,PSMC4,PSMC5,PSMC6,PSMD1,PSMD10,PSMD11,PSMD…				Mitotic Metaphase and Anaphase	18	0.553	-3.333	AHCTF1,ANAPC1,ANAPC10,ANAPC16,ANAPC2,ANAPC4,ANAPC5,ANAPC7,ANKLE2,B9D2,CC2D1B,CDC16,CDC23,CDC26,CDC27,CENPC,CHMP2A,CHMP2B,CHMP3,CHMP4C,CHMP6,CHMP7,CKAP5,CLASP1,CLASP2,CLIP1,DYNC1H1,DYNC1LI2,DYNLL1,DYNLL2,EMD,HDAC8,IST1,ITGB3BP,KIF2A,KPNB1,LBR,LEMD2,LEMD3,LMNA,MAPRE1,MIS12,NDE1,NDEL1,NUDC,NUP155,NUP160,NUP188,NUP205,NUP35,NUP54,NUP62,NUP85,NUP93,NUP98,PAFAH1B1,PDS5A,PDS5B,POM121/POM121C,PPP2CA,PPP2…
20	AMPK Signaling	20.1	0.566	2.772	ACACA,ACTB,AK1,AK2,AK3,AK6,AKT1,AKT1S1,AKT2,AKT3,ARID1A,ARID2,ATF2,ATF4,BRD7,CAB39,CAMKK2,CDKN1A,CPT1A,CPT1C,CREB1,CREB3,CREB3L1,CREB3L2,CREB5,CREBBP,CRTC2,EEF2,EEF2K,ELAVL1,EP300,EPM2A,FASN,FOXO1,FOXO3,FOXO4,GNA11,GNA12,GNA13,GNAI2,GNAI3,GNAQ,GNAS,GNB1,GNB2,GNB5,GNG10,GNG11,GNG12,GNG5,HLTF,HMGCR,INSR,IRS1,IRS2,KAT2B,MAP2K3,MAPK1,MAPK14,MLYCD,MRAS,MTOR,ORAI1,PBRM1,PCK2,PFKFB3,PFKL,PFKM,PFKP,PHF10…			AMPK Signaling	11.5	0.397	2.213	ACTB,AK1,AK2,AK3,AK6,AKT1,AKT1S1,AKT2,ARID1A,ARID2,ATF2,ATF4,BRD7,CAMKK2,CDKN1A,CPT1A,CREB1,CREB3,CREB3L1,CREB3L2,CREBBP,EEF2,EEF2K,EIF4EBP1,ELAVL1,EP300,FASN,FOXO1,GNA11,GNA13,GNAI1,GNAI3,GNAO1,GNAQ,GNAS,GNB1,GNB2,GNB4,GNG10,GNG11,GNG12,GNG5,ILKAP,INSR,IRS1,IRS2,KAT2B,MAP2K3,MAPK14,MLYCD,MRAS,MTOR,ORAI1,PBRM1,PFKFB3,PFKL,PFKP,PHF10,PIK3C2A,PIK3CB,PIK3R1,PIK3R3,PPM1A,PPM1D,PPM1K,PPM1M,PPP2CA,PPP2…				AMPK Signaling	19.1	0.558	-2.837	ACACA,ACTB,AK1,AK2,AK6,AKT1,AKT1S1,AKT2,AKT3,ARID1A,ARID2,ATF2,ATF4,BRD7,CAB39,CAMKK2,CDKN1A,CPT1A,CPT1C,CREB1,CREB3L1,CREB3L2,CREB5,CREBBP,CRTC2,EEF2,ELAVL1,EP300,EPM2A,FASN,FOXO1,FOXO3,FOXO4,GNA11,GNA12,GNA13,GNAI1,GNAI2,GNAI3,GNAO1,GNAQ,GNAS,GNB1,GNB2,GNB4,GNB5,GNG10,GNG11,GNG12,GNG5,HLTF,HMGCR,INSR,IRS1,IRS2,KAT2B,MAP2K3,MAPK1,MAPK14,MLYCD,MRAS,MTOR,ORAI1,PBRM1,PCK2,PFKFB3,PFKL,PFKM,PFKP,PHF1…
21	ILK Signaling	19.8	0.592	2.335	ACTA2,ACTB,ACTG1,ACTG2,ACTN1,ACTN2,ACTN4,AKT1,AKT2,AKT3,ARHGEF6,ATF2,ATF4,BMP2,CASP3,CFL1,CFL2,CREB1,CREB3,CREB3L1,CREB3L2,CREB5,CREBBP,CTNNB1,DOCK1,DSP,FBLIM1,FERMT2,FLNA,FLNB,FLNC,FN1,FNBP1,FOS,GSK3A,GSK3B,HIF1A,ILK,IRS1,IRS2,ITGB1,ITGB3,ITGB5,ITGB8,JUN,KRT18,LIMS1,LIMS2,MAP2K4,MAPK1,MAPK3,MAPK8,MAPK9,MTOR,MYC,MYH11,MYH9,MYL6,MYL9,MYO10,MYO18A,MYO18B,NACA,NFKB1,NFKB2,PARVA,PDGFC,PDPK1,PIK3C2A,P…			ILK Signaling	15.6	0.458	2.092	ACTA2,ACTB,ACTG1,ACTG2,ACTN1,ACTN2,ACTN4,AKT1,AKT2,ATF2,ATF4,BMP2,Cdc42,CFL1,CFL2,CREB1,CREB3,CREB3L1,CREB3L2,CREBBP,CTNNB1,DOCK1,DSP,FBLIM1,FERMT2,FLNA,FLNB,FLNC,FN1,FNBP1,FOS,GSK3A,HIF1A,ILK,ILKAP,IRS1,IRS2,ITGB1,ITGB3,ITGB5,JUN,KRT18,LIMS1,LIMS2,MAP2K4,MAPK3,MAPK8,MAPK9,MTOR,MYH10,MYH11,MYH9,MYL4,MYL6,MYL9,MYO10,MYO18A,MYO18B,NACA,PARVA,PDGFC,PIK3C2A,PIK3CB,PIK3R1,PIK3R3,PPP1R12A,PPP1R14B,PPP2…				ILK Signaling	20.3	0.597	-3.518	ACTA2,ACTB,ACTG1,ACTG2,ACTN1,ACTN2,ACTN4,AKT1,AKT2,AKT3,ARHGEF6,ATF2,ATF4,BMP2,CASP3,CFL1,CFL2,CREB1,CREB3L1,CREB3L2,CREB5,CREBBP,CTNNB1,DOCK1,DSP,FBLIM1,FERMT2,FLNA,FLNB,FLNC,FN1,FNBP1,FOS,GSK3A,GSK3B,HIF1A,ILK,IRS1,IRS2,ITGB1,ITGB3,ITGB5,ITGB8,JUN,KRT18,LIMS1,LIMS2,MAP2K4,MAPK1,MAPK3,MAPK8,MAPK9,MTOR,MYC,MYH10,MYH11,MYH9,MYL4,MYL9,MYO10,MYO18A,MYO18B,NACA,NCK2,NFKB1,NFKB2,PARVA,PDGFC,PDPK1,PIK3…
22	PDGF Signaling	19.6	0.759	4.093	ABL1,ABL2,ACP1,CAV3,CRK,CRKL,CSNK2A1,CSNK2A2,CSNK2B,EIF2AK2,ELK1,FOS,GRB2,INPP5B,INPP5F,INPP5K,INPPL1,JAK1,JAK2,JUN,KRAS,MAP2K1,MAP2K2,MAP2K4,MAP3K1,MAPK1,MAPK3,MAPK8,MRAS,MYC,NRAS,OCRL,PDGFA,PDGFC,PDGFD,PDGFRB,PIK3C2A,PIK3C2B,PIK3C3,PIK3CA,PIK3CB,PIK3R1,PIK3R2,PIK3R3,PIK3R4,PLCG1,PRKCA,RAF1,RALA,RALB,RAP1A,RAP1B,RAP2A,RASA1,RASD1,RRAS,RRAS2,SHC1,SOS1,SOS2,SPHK2,SRC,SRF,STAT3,SYNJ1,SYNJ2			PDGF Signaling	7.78	0.471	2.03	CAV1,CAV3,CRK,CSNK2A1,CSNK2A2,CSNK2B,FOS,HRAS,INPP5K,JAK1,JAK2,JUN,KRAS,MAP2K1,MAP2K2,MAP2K4,MAP3K1,MAPK3,MAPK8,MRAS,NRAS,PDGFA,PDGFC,PDGFD,PDGFRB,PIK3C2A,PIK3CB,PIK3R1,PIK3R3,PRKCA,RAF1,RALA,RALB,RAP1A,RAP1B,RASA1,RRAS,SOS2,SPHK2,SRC,STAT3				PDGF Signaling	19.6	0.759	-3.349	ABL1,ABL2,ACP1,CAV1,CAV3,CRK,CRKL,CSNK2A1,CSNK2A2,CSNK2B,EIF2AK2,ELK1,FOS,GRB2,INPP5B,INPP5F,INPP5K,INPPL1,JAK1,JAK2,JUN,KRAS,MAP2K1,MAP2K2,MAP2K4,MAP3K1,MAPK1,MAPK3,MAPK8,MRAS,MYC,NRAS,OCRL,PDGFA,PDGFC,PDGFD,PDGFRB,PIK3C2A,PIK3C2B,PIK3C3,PIK3CA,PIK3CB,PIK3R1,PIK3R2,PIK3R3,PIK3R4,PLCG1,PRKCA,RAF1,RALA,RALB,RAP1B,RAP2A,RASA1,RASD1,RRAS,RRAS2,SHC1,SOS1,SOS2,SPHK2,SRC,SRF,STAT3,SYNJ1,SYNJ2
23	ERK/MAPK Signaling	19.2	0.577	3.611	ARAF,ATF1,ATF2,ATF4,BAD,BCAR1,BRAF,CREB1,CREB3,CREB3L1,CREB3L2,CREB5,CREBBP,CRK,CRKL,DOCK1,DUSP1,DUSP6,ELF1,ELF2,ELF4,ELK1,ELK3,ETS1,ETS2,FOS,GRB2,H3-3A/H3-3B,HSPB1,HSPB2,HSPB7,ITGA1,ITGA3,ITGA5,ITGA7,ITGA8,ITGA9,ITGAV,ITGB1,ITGB3,ITGB5,ITGB8,KRAS,KSR1,LAMTOR3,MAP2K1,MAP2K2,MAPK1,MAPK3,MKNK2,MRAS,MYC,NFATC1,NRAS,PAK2,PAK3,PIK3C2A,PIK3C2B,PIK3C3,PIK3CA,PIK3CB,PIK3R1,PIK3R2,PIK3R3,PIK3R4,PLA2G12A,P…			ERK/MAPK Signaling	8.98	0.381	2.528	ARAF,ATF1,ATF2,ATF4,BAD,CREB1,CREB3,CREB3L1,CREB3L2,CREBBP,CRK,DOCK1,DUSP1,EIF4E,EIF4EBP1,ELF1,ELK3,ETS2,FOS,H3-3A/H3-3B,HRAS,HSPB1,HSPB2,HSPB7,ITGA1,ITGA5,ITGA7,ITGA9,ITGAV,ITGB1,ITGB3,ITGB5,KRAS,LAMTOR3,MAP2K1,MAP2K2,MAPK3,MKNK2,MRAS,NRAS,PAK2,PIK3C2A,PIK3CB,PIK3R1,PIK3R3,PLA2G12A,PLA2G4A,PPP1CB,PPP1R10,PPP1R11,PPP1R12A,PPP1R14A,PPP1R14B,PPP1R14C,PPP1R3C,PPP1R7,PPP2CA,PPP2R1A,PPP2R3A,PPP2R5A,PR…				ERK/MAPK Signaling	14.1	0.53	-2.513	ARAF,ATF1,ATF2,ATF4,BCAR1,BRAF,CREB1,CREB3L1,CREB3L2,CREB5,CREBBP,CRK,CRKL,DOCK1,DUSP1,DUSP6,EIF4E,ELF1,ELF2,ELF4,ELK1,ELK3,ETS1,ETS2,FOS,GRB2,HSPB1,HSPB2,ITGA1,ITGA3,ITGA5,ITGA7,ITGA8,ITGA9,ITGAV,ITGB1,ITGB3,ITGB5,ITGB8,KRAS,KSR1,MAP2K1,MAP2K2,MAPK1,MAPK3,MKNK2,MRAS,MYC,NFATC1,NRAS,PAK2,PAK3,PIK3C2A,PIK3C2B,PIK3C3,PIK3CA,PIK3CB,PIK3R1,PIK3R2,PIK3R3,PIK3R4,PLA2G12A,PLCG1,PPP1CA,PPP1CB,PPP1R10,PPP…
24	Glioma Signaling	19.1	0.672	3.883	ABL1,AKT1,AKT2,AKT3,Calm1 (includes others),CAMK1D,CAMK2D,CAMK2G,CCND2,CCND3,CDK4,CDK6,CDKN1A,CDKN2D,E2F3,E2F5,E2F6,EGFR,GRB2,HDAC1,HDAC11,HDAC2,HDAC3,HDAC4,HDAC5,HDAC6,HDAC7,HDAC8,HDAC9,IDH1,IDH2,IDH3B,IDH3G,IGF1R,IGF2R,KRAS,MAP2K1,MAP2K2,MAPK1,MAPK3,MDM2,MRAS,MTOR,NRAS,PA2G4,PDGFA,PDGFC,PDGFD,PDGFRB,PIK3C2A,PIK3C2B,PIK3C3,PIK3CA,PIK3CB,PIK3R1,PIK3R2,PIK3R3,PIK3R4,PLCG1,PRKCA,PRKCD,PRKCE,PRKCG,P…			Glioma Signaling	10.4	0.464	2.401	AKT1,AKT2,Calm1 (includes others),CAMK1D,CAMK2G,CCND2,CDK4,CDK6,CDKN1A,CDKN2D,E2F4,E2F5,E2F6,EGFR,HDAC2,HDAC3,HDAC4,HDAC5,HDAC7,HDAC8,HDAC9,HRAS,IDH1,IDH3B,IDH3G,IGF1R,KRAS,MAP2K1,MAP2K2,MAPK3,MDM2,MRAS,MTOR,NRAS,PA2G4,PDGFA,PDGFC,PDGFD,PDGFRB,PIK3C2A,PIK3CB,PIK3R1,PIK3R3,PRKCA,PRKCD,PRKCE,PRKD1,RAF1,RALA,RALB,RAP1A,RAP1B,RBL2,RRAS,SIN3A,SOS2,TFDP1,TP53				Glioma Signaling	16.3	0.64	-3.96	ABL1,AKT1,AKT2,AKT3,Calm1 (includes others),CAMK1,CAMK1D,CAMK2D,CAMK2G,CCND2,CCND3,CDK4,CDK6,CDKN1A,E2F3,E2F5,E2F6,EGFR,GRB2,HDAC1,HDAC11,HDAC2,HDAC3,HDAC4,HDAC5,HDAC6,HDAC7,HDAC8,HDAC9,IDH1,IDH2,IDH3G,IGF1R,IGF2R,KRAS,MAP2K1,MAP2K2,MAPK1,MAPK3,MDM2,MRAS,MTOR,NRAS,PA2G4,PDGFA,PDGFC,PDGFD,PDGFRB,PIK3C2A,PIK3C2B,PIK3C3,PIK3CA,PIK3CB,PIK3R1,PIK3R2,PIK3R3,PIK3R4,PLCG1,PRKCA,PRKCE,PRKCG,PRKCI,PRKD3,PT…
25	TCF dependent signaling in response to WNT	19.1	0.588	3.606	AKT1,AKT2,AMER1,APC,ASH2L,AXIN1,BCL9,BCL9L,BTRC,CBY1,CCDC88C,CDC73,CHD8,CREBBP,CSNK1A1,CSNK1E,CSNK2A1,CSNK2A2,CSNK2B,CTNNB1,CTNNBIP1,CUL3,DACT1,DVL3,EP300,FRAT2,FZD2,FZD5,FZD6,FZD8,GSK3B,HDAC1,KAT5,KLHL12,KMT2D,KREMEN1,LEO1,LGR4,LGR6,LRP5,LRP6,MYC,PIP5K1B,PPP2CA,PPP2CB,PPP2R1A,PPP2R1B,PPP2R5A,PPP2R5B,PPP2R5D,PPP2R5E,PSMA1,PSMA2,PSMA3,PSMA5,PSMA6,PSMA7,PSMB1,PSMB2,PSMB3,PSMB6,PSMB7,PSMC1,PSMC2,PSM…			TCF dependent signaling in response to WNT	15.4	0.457	4.298	AKT1,AKT2,AXIN1,BCL9L,CAV1,CBY1,CDC73,CHD8,CREBBP,CSNK1A1,CSNK1E,CSNK2A1,CSNK2A2,CSNK2B,CTBP1,CTNNB1,CTNNBIP1,CUL3,DVL1,DVL3,EP300,FZD1,FZD2,FZD8,KMT2D,LEO1,LGR4,LGR6,PIP5K1B,PPP2CA,PPP2R1A,PPP2R5A,PSMA1,PSMA2,PSMA3,PSMA5,PSMA6,PSMA7,PSMB1,PSMB2,PSMB3,PSMB4,PSMB5,PSMB6,PSMB7,PSMC1,PSMC2,PSMC4,PSMC5,PSMC6,PSMD1,PSMD10,PSMD11,PSMD12,PSMD13,PSMD14,PSMD3,PSMD4,PSMD5,PSMD6,PSMD7,PSMD8,PSMD9,PSME1,PSME…				TCF dependent signaling in response to WNT	16.9	0.568	-3.857	AKT1,AKT2,AMER1,APC,ASH2L,AXIN1,BCL9,BCL9L,BTRC,CAV1,CBY1,CCDC88C,CDC73,CHD8,CREBBP,CSNK1A1,CSNK1E,CSNK1G2,CSNK2A1,CSNK2A2,CSNK2B,CTBP1,CTNNB1,CTNNBIP1,CUL3,DACT1,DVL1,DVL3,EP300,FRAT2,FZD1,FZD2,FZD5,FZD6,FZD8,GSK3B,HDAC1,KAT5,KLHL12,KMT2D,KREMEN1,LEO1,LGR4,LGR6,LRP5,LRP6,MYC,PIP5K1B,PPP2CA,PPP2CB,PPP2R1A,PPP2R1B,PPP2R5A,PPP2R5B,PPP2R5D,PPP2R5E,PSMA1,PSMA2,PSMA3,PSMA5,PSMB1,PSMB10,PSMB2,PSMB3,PSM…
26	14-3-3-mediated Signaling	18.4	0.661	3.881	AKT1,AKT1S1,AKT2,AKT3,BAD,BAX,CBL,CDKN1B,ELK1,FOS,FOXO1,GRB2,GSK3A,GSK3B,JUN,KRAS,MAP2K1,MAP2K2,MAP2K4,MAP3K5,MAPK1,MAPK3,MAPK8,MAPK9,MRAS,NRAS,PDCD6IP,PDIA3,PIK3C2A,PIK3C2B,PIK3C3,PIK3CA,PIK3CB,PIK3R1,PIK3R2,PIK3R3,PIK3R4,PLCB3,PLCB4,PLCD1,PLCD3,PLCE1,PLCG1,PLCL1,PRKCA,PRKCD,PRKCE,PRKCG,PRKCI,PRKD1,PRKD3,RAF1,RALA,RALB,RAP1A,RAP1B,RAP2A,RASD1,RRAS,RRAS2,SRC,SRPK2,STK11,STRADA,TNFRSF1A,TRAF2,TSC1…			14-3-3-mediated Signaling	8.51	0.433	2.714	AKT1,AKT1S1,AKT2,BAD,BAX,FOS,FOXO1,GSK3A,HRAS,JUN,KRAS,MAP2K1,MAP2K2,MAP2K4,MAPK3,MAPK8,MAPK9,MRAS,NRAS,PDIA3,PIK3C2A,PIK3CB,PIK3R1,PIK3R3,PLCB1,PLCB3,PLCB4,PLCD1,PLCE1,PRKCA,PRKCD,PRKCE,PRKD1,RAF1,RALA,RALB,RAP1A,RAP1B,RRAS,SRC,SRPK2,STRADA,TNFRSF1A,TSC2,TUBA1A,TUBA1B,TUBA1C,TUBB2A,TUBB6,TUBG1,VIM,YWHAE,YWHAH,YWHAQ,YWHAZ				14-3-3-mediated Signaling	15.1	0.622	-3.81	AKT1,AKT1S1,AKT2,AKT3,BAX,CBL,CDKN1B,ELK1,FOS,FOXO1,GRB2,GSK3A,GSK3B,JUN,KRAS,MAP2K1,MAP2K2,MAP2K4,MAP3K5,MAPK1,MAPK3,MAPK8,MAPK9,MRAS,NRAS,PDCD6IP,PDIA3,PIK3C2A,PIK3C2B,PIK3C3,PIK3CA,PIK3CB,PIK3R1,PIK3R2,PIK3R3,PIK3R4,PLCB1,PLCB3,PLCB4,PLCD1,PLCD3,PLCE1,PLCG1,PLCL1,PRKCA,PRKCE,PRKCG,PRKCI,PRKD3,RAF1,RALA,RALB,RAP1B,RAP2A,RASD1,RRAS,RRAS2,SRC,SRPK2,STK11,STRADA,TNFRSF1A,TRAF2,TSC1,TSC2,TUBA1A,TUB…
27	Sertoli Cell-Germ Cell Junction Signaling Pathway (Enhanced)	18.3	0.555	3.407	ACTA2,ACTB,ACTG1,ACTG2,ACTR2,ACTR3,AFDN,AKT1,AKT2,AKT3,ARPC1B,ARPC2,ARPC3,ARPC4,ARPC5,ARPC5L,AXIN1,BCAR1,CD2AP,CLDN22,CLDN3,CTNNA1,CTNNB1,CTNND1,F11R,FOS,FOSB,FOSL1,FOSL2,GSK3A,GSK3B,GUCY1A1,GUCY1A2,IL1R1,ILK,IQGAP1,ITGA3,ITGB1,JAM3,JUN,JUP,KRAS,LAMA2,LAMA4,LAMA5,LAMB2,LAMC1,LAMC3,MAP2K1,MAP2K2,MAP2K3,MAP2K4,MAP2K7,MAP3K1,MAP3K10,MAP3K14,MAP3K2,MAP3K3,MAP3K4,MAP3K5,MAP3K6,Map3k7,MAP3K8,MAPK1,MAPK…			Sertoli Cell-Germ Cell Junction Signaling Pathway (Enhanced)	9.39	0.377	2.862	ACTA2,ACTB,ACTG1,ACTG2,ACTR2,ACTR3,AFDN,AKT1,AKT2,ARPC1A,ARPC3,ARPC4,ARPC5L,AXIN1,CLDN22,CTNNA1,CTNNB1,CTNND1,FOS,FOSB,FOSL2,GJA1,GSK3A,GUCY1A1,GUCY1B1,HRAS,ILK,ITGB1,JAM3,JUN,JUP,KRAS,LAMA2,LAMA4,LAMA5,LAMB2,LAMC3,MAP2K1,MAP2K2,MAP2K3,MAP2K4,MAP2K7,MAP3K1,MAP3K10,MAP3K2,MAP3K3,Map3k7,MAP3K8,MAPK14,MAPK3,MAPK8,MAPK9,MRAS,MTMR2,NECTIN3,NRAS,PIK3C2A,PIK3CB,PIK3R1,PIK3R3,PPP2CA,PPP2R1A,PPP2R2D,PPP2R…				Sertoli Cell-Germ Cell Junction Signaling Pathway (Enhanced)	16.8	0.542	-2.298	ACTA2,ACTB,ACTG1,ACTG2,ACTR3,AFDN,AKT1,AKT2,AKT3,ARPC1A,ARPC2,ARPC3,ARPC4,ARPC5,AXIN1,BCAR1,CD2AP,CLDN22,CLDN3,CTNNA1,CTNNB1,CTNND1,F11R,FOS,FOSB,FOSL1,FOSL2,GJA1,GSK3A,GSK3B,GUCY1A1,GUCY1A2,GUCY1B1,IL1R1,ILK,IQGAP1,ITGA3,ITGB1,JAM3,JUN,JUP,KRAS,LAMA2,LAMA4,LAMA5,LAMB2,LAMC1,MAP2K1,MAP2K2,MAP2K3,MAP2K4,MAP2K7,MAP3K1,MAP3K10,MAP3K14,MAP3K2,MAP3K3,MAP3K4,MAP3K5,MAP3K6,Map3k7,MAP3K8,MAPK1,MAPK14,MAP…
28	Non-Small Cell Lung Cancer Signaling	18.3	0.723	2.655	ABL1,AKT1,AKT2,AKT3,BAD,CCND2,CCND3,CDK4,CDK6,E2F3,E2F5,E2F6,EGFR,FHIT,FOXO3,GRB2,HDAC1,HDAC11,HDAC2,HDAC3,HDAC4,HDAC5,HDAC6,HDAC7,HDAC8,HDAC9,ITPR1,KRAS,MAP2K1,MAP2K2,MAPK1,MAPK3,MRAS,NRAS,PA2G4,PDPK1,PIK3C2A,PIK3C2B,PIK3C3,PIK3CA,PIK3CB,PIK3R1,PIK3R2,PIK3R3,PIK3R4,PLCG1,PRKCA,RAF1,RALA,RALB,RAP1A,RAP1B,RAP2A,RARB,RASD1,RASSF1,RB1,RBL2,RRAS,RRAS2,RXRA,RXRB,SIN3A,SOS1,SOS2,STK4,TFDP1,TP53			Non-Small Cell Lung Cancer Signaling	8.75	0.479	2.353	AKT1,AKT2,BAD,CCND2,CDK4,CDK6,E2F4,E2F5,E2F6,EGFR,HDAC2,HDAC3,HDAC4,HDAC5,HDAC7,HDAC8,HDAC9,HRAS,ITPR1,KRAS,MAP2K1,MAP2K2,MAPK3,MRAS,NRAS,PA2G4,PIK3C2A,PIK3CB,PIK3R1,PIK3R3,PRKCA,RAF1,RALA,RALB,RAP1A,RAP1B,RASSF1,RBL2,RRAS,RXRA,RXRB,SIN3A,SOS2,TFDP1,TP53				Non-Small Cell Lung Cancer Signaling	16.7	0.702	-2.082	ABL1,AKT1,AKT2,AKT3,CCND2,CCND3,CDK4,CDK6,E2F3,E2F5,E2F6,EGFR,FHIT,FOXO3,GRB2,HDAC1,HDAC11,HDAC2,HDAC3,HDAC4,HDAC5,HDAC6,HDAC7,HDAC8,HDAC9,ITPR1,KRAS,MAP2K1,MAP2K2,MAPK1,MAPK3,MRAS,NRAS,PA2G4,PDPK1,PIK3C2A,PIK3C2B,PIK3C3,PIK3CA,PIK3CB,PIK3R1,PIK3R2,PIK3R3,PIK3R4,PLCG1,PRKCA,RAF1,RALA,RALB,RAP1B,RAP2A,RARB,RASD1,RASSF1,RB1,RBL2,RRAS,RRAS2,RXRA,RXRB,SIN3A,SOS1,SOS2,STK4,TFDP1,TP53
29	Thrombin Signaling	18.1	0.56	5.157	ADCY3,ADCY5,ADCY6,ADCY9,AKT1,AKT2,AKT3,ARHGEF1,ARHGEF10,ARHGEF10L,ARHGEF11,ARHGEF12,ARHGEF17,ARHGEF18,ARHGEF2,ARHGEF25,ARHGEF3,ARHGEF40,ARHGEF5,ARHGEF6,ARHGEF7,ARHGEF9,CAMK1D,CAMK2D,CAMK2G,CREB1,EGFR,ELK1,F2R,FNBP1,GATA6,GNA11,GNA12,GNA13,GNAI2,GNAI3,GNAQ,GNAS,GNB1,GNB2,GNB5,GNG10,GNG11,GNG12,GNG5,GRB2,GUCY1A1,IKBKB,ITPR1,KRAS,MAP2K1,MAP2K2,MAPK1,MAPK14,MAPK3,MPRIP,MRAS,MYL12A,MYL12B,MYL6,MYL9,MY…			Thrombin Signaling	13.8	0.427	2.853	ADCY3,ADCY6,ADCY9,AKT1,AKT2,ARHGEF1,ARHGEF10L,ARHGEF11,ARHGEF12,ARHGEF17,ARHGEF18,ARHGEF2,ARHGEF25,ARHGEF40,ARHGEF5,ARHGEF7,CAMK1D,CAMK2G,Cdc42,CREB1,EGFR,F2R,FNBP1,GATA6,GNA11,GNA13,GNAI1,GNAI3,GNAO1,GNAQ,GNAS,GNB1,GNB2,GNB4,GNG10,GNG11,GNG12,GNG5,GUCY1A1,GUCY1B1,HRAS,IKBKB,ITPR1,KRAS,MAP2K1,MAP2K2,MAPK14,MAPK3,MPRIP,MRAS,MYL12A,MYL12B,MYL4,MYL6,MYL9,NRAS,PDIA3,PIK3C2A,PIK3CB,PIK3R1,PIK3R3,PLCB1…				Thrombin Signaling	18	0.56	-5.421	ADCY3,ADCY5,ADCY6,ADCY7,ADCY9,AKT1,AKT2,AKT3,ARHGEF1,ARHGEF10,ARHGEF10L,ARHGEF11,ARHGEF12,ARHGEF17,ARHGEF18,ARHGEF2,ARHGEF25,ARHGEF3,ARHGEF40,ARHGEF5,ARHGEF6,ARHGEF7,ARHGEF9,CAMK1,CAMK1D,CAMK2D,CAMK2G,CREB1,EGFR,ELK1,F2R,FNBP1,GATA6,GNA11,GNA12,GNA13,GNAI1,GNAI2,GNAI3,GNAO1,GNAQ,GNAS,GNB1,GNB2,GNB4,GNB5,GNG10,GNG11,GNG12,GNG5,GRB2,GUCY1A1,GUCY1B1,IKBKB,ITPR1,KRAS,MAP2K1,MAP2K2,MAPK1,MAPK14,MAPK3,…
30	VEGF Signaling	17.9	0.707	2.994	ACTA2,ACTB,ACTG1,ACTG2,ACTN1,ACTN2,ACTN4,AKT1,AKT2,AKT3,ARNT,BAD,BCL2,BCL2L1,EIF1AX,EIF1AY,EIF2B1,EIF2B2,EIF2B3,EIF2B4,EIF2B5,EIF2S1,EIF2S2,EIF2S3,ELAVL1,FLT1,FOXO1,FOXO3,GRB2,HIF1A,KRAS,MAP2K1,MAP2K2,MAPK1,MAPK3,MRAS,NRAS,PDGFC,PIK3C2A,PIK3C2B,PIK3C3,PIK3CA,PIK3CB,PIK3R1,PIK3R2,PIK3R3,PIK3R4,PLCG1,PRKCA,PTK2,PTPN11,PXN,RAF1,RALA,RALB,RAP1A,RAP1B,RAP2A,RASD1,ROCK1,ROCK2,RRAS,RRAS2,SHC1,SOS1,SOS2,…			VEGF Signaling	11.3	0.515	3.479	ACTA2,ACTB,ACTG1,ACTG2,ACTN1,ACTN2,ACTN4,AKT1,AKT2,ARNT,BAD,BCL2,BCL2L1,EIF1AY,EIF2B1,EIF2B2,EIF2B4,EIF2S1,EIF2S2,EIF2S3,ELAVL1,FLT1,FOXO1,HIF1A,HRAS,KRAS,MAP2K1,MAP2K2,MAPK3,MRAS,NRAS,PDGFC,PIK3C2A,PIK3CB,PIK3R1,PIK3R3,PRKCA,PTK2,RAF1,RALA,RALB,RAP1A,RAP1B,ROCK1,ROCK2,RRAS,SOS2,SRC,VCL,VEGFB,YWHAE				VEGF Signaling	16.3	0.687	-2.61	ACTA2,ACTB,ACTG1,ACTG2,ACTN1,ACTN2,ACTN4,AKT1,AKT2,AKT3,ARNT,BCL2,BCL2L1,EIF1AX,EIF1AY,EIF2B2,EIF2B3,EIF2B4,EIF2B5,EIF2S1,EIF2S2,EIF2S3,ELAVL1,FLT1,FOXO1,FOXO3,GRB2,HIF1A,KRAS,MAP2K1,MAP2K2,MAPK1,MAPK3,MRAS,NRAS,PDGFC,PIK3C2A,PIK3C2B,PIK3C3,PIK3CA,PIK3CB,PIK3R1,PIK3R2,PIK3R3,PIK3R4,PLCG1,PRKCA,PTK2,PTPN11,PXN,RAF1,RALA,RALB,RAP1B,RAP2A,RASD1,ROCK1,RRAS,RRAS2,SHC1,SOS1,SOS2,SRC,VCL,VEGFA,VEGFB,VEG…
31	Role of Tissue Factor in Cancer	17.8	0.57	5.155	ACVR1,ACVR1B,ACVR2A,AKT1,AKT2,AKT3,ARAF,BCL2,BCL2L1,BMPR2,BRAF,CASP3,CCN1,CCN2,CFL1,CFL2,CHUK,CSF1,EGFR,EGR1,ELK1,F2R,F3,FLNC,FLT1,FOS,FRK,GNA11,GNA12,GNA13,GNAQ,HBEGF,IKBKB,IKBKG,ITGA3,ITGAV,ITGB1,ITGB3,JAK2,JUN,KRAS,MAP2K1,MAP2K2,MAP2K3,MAP2K4,MAP2K5,MAP2K7,MAPK1,MAPK14,MAPK3,MAPK6,MAPK8,MAPK9,MRAS,MTOR,NFKB1,NFKB2,NRAS,P4HB,PDIA6,PIK3C2A,PIK3C2B,PIK3C3,PIK3CA,PIK3CB,PIK3R1,PIK3R2,PIK3R3,PIK3R4…			Role of Tissue Factor in Cancer	9.5	0.391	3	ACVR1,AKT1,AKT2,ARAF,BCL2,BCL2L1,BMPR2,CCN1,CCN2,CFL1,CFL2,CHUK,CSF1,EGFR,EGR1,EIF4E,F2R,FLNC,FLT1,FOS,GNA11,GNA13,GNAQ,HBEGF,HRAS,IKBKB,ITGAV,ITGB1,ITGB3,JAK2,JUN,KRAS,MAP2K1,MAP2K2,MAP2K3,MAP2K4,MAP2K7,MAPK14,MAPK3,MAPK6,MAPK8,MAPK9,MRAS,MTOR,NRAS,P4HB,PDIA6,PIK3C2A,PIK3CB,PIK3R1,PIK3R3,PLAUR,PLCB1,PPP2CA,PPP2R1A,PPP2R2D,PPP2R3A,Ppp2r3d,PPP2R5A,PRKCA,PTK2,RAF1,RALA,RALB,RAP1A,RAP1B,RBL2,RPS6KA3…				Role of Tissue Factor in Cancer	18.3	0.575	-3.942	ACVR1,ACVR1B,ACVR2A,AKT1,AKT2,AKT3,ARAF,BCL2,BCL2L1,BMPR2,BRAF,CASP3,CCN2,CFL1,CFL2,CHUK,CSF1,EGFR,EGR1,EIF4E,ELK1,F2R,F3,FLNC,FLT1,FOS,FRK,GNA11,GNA12,GNA13,GNAQ,HBEGF,IKBKB,IKBKG,ITGA3,ITGAV,ITGB1,ITGB3,JAK2,JUN,KRAS,MAP2K1,MAP2K2,MAP2K3,MAP2K4,MAP2K5,MAP2K7,MAPK1,MAPK14,MAPK3,MAPK6,MAPK8,MAPK9,MRAS,MTOR,NFKB1,NFKB2,NRAS,P4HB,PDIA6,PIK3C2A,PIK3C2B,PIK3C3,PIK3CA,PIK3CB,PIK3R1,PIK3R2,PIK3R3,PIK3R…
32	HGF Signaling	17.5	0.644	5.658	AKT1,AKT2,AKT3,ATF2,CDKN1A,CRKL,DOCK1,ELF1,ELF2,ELF4,ELK1,ELK3,ETS1,ETS2,FOS,GAB1,GRB2,ITGA1,ITGA3,ITGA5,ITGA7,ITGA8,ITGA9,ITGAV,ITGB1,ITGB3,ITGB5,ITGB8,JUN,KRAS,MAP2K1,MAP2K2,MAP2K4,MAP2K7,MAP3K1,MAP3K10,MAP3K14,MAP3K2,MAP3K3,MAP3K4,MAP3K5,MAP3K6,Map3k7,MAP3K8,MAPK1,MAPK3,MAPK8,MAPK9,MRAS,NRAS,PIK3C2A,PIK3C2B,PIK3C3,PIK3CA,PIK3CB,PIK3R1,PIK3R2,PIK3R3,PIK3R4,PLCG1,PRKCA,PRKCD,PRKCE,PRKCG,PRKCI,PR…			HGF Signaling	6.89	0.402	3.015	AKT1,AKT2,ATF2,CDKN1A,DOCK1,ELF1,ELK3,ETS2,FOS,GAB1,HRAS,ITGA1,ITGA5,ITGA7,ITGA9,ITGAV,ITGB1,ITGB3,ITGB5,JUN,KRAS,MAP2K1,MAP2K2,MAP2K4,MAP2K7,MAP3K1,MAP3K10,MAP3K2,MAP3K3,Map3k7,MAP3K8,MAPK3,MAPK8,MAPK9,MRAS,NRAS,PIK3C2A,PIK3CB,PIK3R1,PIK3R3,PRKCA,PRKCD,PRKCE,PRKD1,PTK2,RAF1,RALA,RALB,RAP1A,RAP1B,RRAS,SOS2,STAT3				HGF Signaling	14.9	0.614	-4.677	AKT1,AKT2,AKT3,ATF2,CDKN1A,CRKL,DOCK1,ELF1,ELF2,ELF4,ELK1,ELK3,ETS1,ETS2,FOS,GAB1,GRB2,ITGA1,ITGA3,ITGA5,ITGA7,ITGA8,ITGA9,ITGAV,ITGB1,ITGB3,ITGB5,ITGB8,JUN,KRAS,MAP2K1,MAP2K2,MAP2K4,MAP2K7,MAP3K1,MAP3K10,MAP3K14,MAP3K2,MAP3K3,MAP3K4,MAP3K5,MAP3K6,Map3k7,MAP3K8,MAPK1,MAPK3,MAPK8,MAPK9,MRAS,NRAS,PIK3C2A,PIK3C2B,PIK3C3,PIK3CA,PIK3CB,PIK3R1,PIK3R2,PIK3R3,PIK3R4,PLCG1,PRKCA,PRKCE,PRKCG,PRKCI,PRKD3,PT…
33	Neutrophil degranulation	17.3	0.464	3.027	ACAA1,ACLY,ACTR1B,ACTR2,ADAM10,ADGRE5,AGL,AGPAT2,ALDOA,ANO6,ANXA2,AP1M1,AP2A2,APEH,APRT,ARL8A,ARMC8,ARPC5,ARSB,ASAH1,ATG7,ATP11A,ATP11B,ATP6AP2,ATP6V0A1,ATP6V0C,ATP6V1D,ATP8A1,B4GALT1,BRI3,C6orf120,CAB39,CAND1,CANT1,CAP1,CAPN1,CAT,CCT2,CCT8,CD44,CD47,CD63,CDK13,CEP290,CKAP4,CMTM6,CNN2,COMMD9,COPB1,CPNE1,CPNE3,CPPED1,CRISPLD2,CSNK2B,CST3,CSTB,CTSB,CTSD,CTSZ,CYBA,CYFIP1,DBNL,DDOST,DDX3X,DEGS1,DGAT1…			Neutrophil degranulation	17.6	0.374	4.647	ACAA1,ACTR10,ACTR1B,ACTR2,ADAM10,AGA,ALAD,ALDOA,ANO6,ANXA2,AP1M1,AP2A2,APEH,APRT,ARL8A,ASAH1,ATP6AP2,ATP6V0A1,ATP6V0C,ATP6V1D,ATP8A1,B2M,BRI3,C1orf35,C6orf120,CCT8,CD44,CD47,CD63,CKAP4,CNN2,COMMD3,COMMD9,COPB1,CPNE1,CREG1,CRISPLD2,CSNK2B,CST3,CSTB,CTSA,CTSB,CTSC,CTSD,CTSH,CYBA,CYFIP1,DDX3X,DEGS1,DIAPH1,DNAJC13,DNAJC3,DSP,DYNC1H1,DYNC1LI1,DYNLL1,EEF1A1,EEF2,ERP44,FABP5,FGL2,FTH1,FTL,FUCA1,GAA,GDI2…				Neutrophil degranulation	11.2	0.424	-5.207	ACAA1,ACLY,ACTR1B,ADAM10,ADGRE5,AGL,AGPAT2,ALDOA,ANO6,AP1M1,AP2A2,APEH,ARMC8,ARPC5,ARSA,ARSB,ASAH1,ATG7,ATP11A,ATP11B,ATP6V0A1,ATP6V0C,ATP6V1D,ATP8A1,B4GALT1,BRI3,C1orf35,C6orf120,CAB39,CAND1,CANT1,CAP1,CAPN1,CAT,CCT2,CD44,CDK13,CEP290,CKAP4,CMTM6,CNN2,COMMD9,COPB1,CPNE1,CPNE3,CPPED1,CREG1,CRISPLD2,CSNK2B,CST3,CSTB,CTSA,CTSB,CTSC,CTSZ,CYBA,CYFIP1,DBNL,DDX3X,DGAT1,DIAPH1,DNAJC13,DNAJC5,DPP7,DSP,DY…
34	MSP-RON Signaling in Cancer Cells Pathway	16.5	0.621	5	ACTA2,AKT1,AKT2,AKT3,ARAF,ARNT,ATF2,ATF4,BRAF,CREB1,CREB3,CREB3L1,CREB3L2,CREB5,CREBBP,CTNNB1,EGFR,ELF1,ELF2,ELF4,ELK3,ETS1,ETS2,FLNA,FOS,GRB2,GSK3B,HIF1A,ITGB1,JUN,KRAS,MAP2K1,MAP2K2,MAPK1,MAPK3,MRAS,MTOR,MYC,NFKB1,NFKB2,NFKBIA,NRAS,PDGFC,PIK3C2A,PIK3C2B,PIK3C3,PIK3CA,PIK3CB,PIK3R1,PIK3R2,PIK3R3,PIK3R4,PLAUR,PTK2,RAF1,RALA,RALB,RAP1A,RAP1B,RAP2A,RASD1,REL,RELA,RELB,RPS6KA3,RRAS,RRAS2,SMAD2,SOS1,…			MSP-RON Signaling in Cancer Cells Pathway	9	0.429	3.742	ACTA2,AKT1,AKT2,ARAF,ARNT,ATF2,ATF4,CREB1,CREB3,CREB3L1,CREB3L2,CREBBP,CTNNB1,EGFR,ELF1,ELK3,ETS2,FLNA,FOS,HIF1A,HRAS,ITGB1,JUN,KRAS,MAP2K1,MAP2K2,MAPK3,MRAS,MTOR,NFKBIA,NRAS,PDGFC,PIK3C2A,PIK3CB,PIK3R1,PIK3R3,PLAUR,PTK2,RAF1,RALA,RALB,RAP1A,RAP1B,RELB,RPS6KA3,RRAS,SMAD2,SOS2,SRC,STAT3,TCF4,TCF7L1,TCF7L2,TRIM24,VEGFB,VIM,YWHAE,YWHAH,YWHAQ,YWHAZ				MSP-RON Signaling in Cancer Cells Pathway	13.5	0.586	-5.277	ACTA2,AKT1,AKT2,AKT3,ARAF,ARNT,ATF2,ATF4,BRAF,CREB1,CREB3L1,CREB3L2,CREB5,CREBBP,CTNNB1,EGFR,ELF1,ELF2,ELF4,ELK3,ETS1,ETS2,FLNA,FOS,GRB2,GSK3B,HIF1A,ITGB1,JUN,KRAS,MAP2K1,MAP2K2,MAPK1,MAPK3,MRAS,MTOR,MYC,NFKB1,NFKB2,NFKBIA,NRAS,PDGFC,PIK3C2A,PIK3C2B,PIK3C3,PIK3CA,PIK3CB,PIK3R1,PIK3R2,PIK3R3,PIK3R4,PLAUR,PTK2,RAF1,RALA,RALB,RAP1B,RAP2A,RASD1,REL,RELA,RELB,RPS6KA3,RRAS,RRAS2,SMAD2,SOS1,SOS2,SP1,SRC…
35	Insulin Secretion Signaling Pathway	16.5	0.52	4.596	ABCC9,ADCY3,ADCY5,ADCY6,ADCY9,AGO1,AGO2,AGO3,ATF2,ATF4,BET1L,CACNA1C,CACNA1D,CACNA2D1,CACNB2,CACNB3,CAMK2D,CAMK2G,CLCN3,CPE,CREB1,CREB3,CREB3L1,CREB3L2,CREB5,CREBBP,CRTC2,DLAT,DLD,EIF2A,EIF2AK3,EIF2B1,EIF2B2,EIF2B3,EIF2B4,EIF2B5,EIF2S1,EIF2S2,EIF2S3,EIF4A1,EIF4A2,EIF4A3,EIF4E3,EIF4EBP2,EIF4G1,EIF4G2,EIF4G3,ELP5,FURIN,GHR,GNA11,GNAQ,GNAS,GOSR1,GOSR2,GPAA1,GUCY1A1,INSR,ITPR1,JAK1,JAK2,KCNJ8,KLF11,M…			Insulin Secretion Signaling Pathway	10.9	0.378	2.178	ABCC9,ADCY3,ADCY6,ADCY9,ATF2,ATF4,BET1L,CACNA1C,CACNA2D1,CACNA2D3,CACNB2,CACNB3,CAMK2G,CLCN3,CPE,CREB1,CREB3,CREB3L1,CREB3L2,CREBBP,DLD,EIF2A,EIF2B1,EIF2B2,EIF2B4,EIF2S1,EIF2S2,EIF2S3,EIF4A1,EIF4A2,EIF4A3,EIF4E,EIF4E3,EIF4EBP1,EIF4EBP2,EIF4G2,EIF4G3,FURIN,GNA11,GNAQ,GNAS,GPAA1,GUCY1A1,GUCY1B1,INSR,ITPR1,JAK1,JAK2,KCNJ8,MAPK14,MAPK3,MTOR,NALCN,NAPA,PABPC1,PAIP1,PDHA1,PDHB,PDIA3,PIK3C2A,PIK3CB,PIK3…				Insulin Secretion Signaling Pathway	15.6	0.513	-4.138	ABCC9,ADCY3,ADCY5,ADCY6,ADCY7,ADCY9,AGO1,AGO2,AGO3,ATF2,ATF4,BET1L,CACNA1C,CACNA1D,CACNA2D1,CACNA2D3,CACNB2,CACNB3,CAMK2D,CAMK2G,CLCN3,CREB1,CREB3L1,CREB3L2,CREB5,CREBBP,CRTC2,DLAT,DLD,EIF2A,EIF2AK3,EIF2B2,EIF2B3,EIF2B4,EIF2B5,EIF2S1,EIF2S2,EIF2S3,EIF4A1,EIF4A2,EIF4A3,EIF4E,EIF4E3,EIF4EBP2,EIF4G1,EIF4G2,EIF4G3,ELP5,FURIN,GHR,GNA11,GNAQ,GNAS,GOSR1,GOSR2,GPAA1,GUCY1A1,GUCY1B1,INSR,ITPR1,JAK1,JAK2,K…
36	IL-8 Signaling	16.1	0.552	4.876	AKT1,AKT2,AKT3,ANGPT2,ARAF,BAX,BCL2,BCL2L1,BRAF,CCND2,CCND3,CHUK,CSTB,EGFR,ELP1,FLT1,FNBP1,FOS,GNA11,GNA12,GNA13,GNAI2,GNAI3,GNAQ,GNAS,GNB1,GNB2,GNB5,GNG10,GNG11,GNG12,GNG5,HBEGF,HMOX1,IKBKB,IKBKG,IQGAP1,IRAK1,IRAK2,ITGAV,ITGB3,JUN,KRAS,LASP1,MAP2K1,MAP2K2,MAP2K4,MAP4K4,MAPK1,MAPK3,MAPK8,MAPK9,MRAS,MTOR,MYL12B,MYL9,NAPEPLD,NFKB1,NFKBIA,NFKBIB,NOX4,NRAS,PAK2,PDGFC,PIK3C2A,PIK3C2B,PIK3C3,PIK3CA,PIK…			IL-8 Signaling	13.6	0.433	2.363	AKT1,AKT2,ARAF,BAX,BCL2,BCL2L1,CCND2,Cdc42,CHUK,CSTB,EGFR,EIF4EBP1,FLT1,FNBP1,FOS,GNA11,GNA13,GNAI1,GNAI3,GNAO1,GNAQ,GNAS,GNB1,GNB2,GNB4,GNG10,GNG11,GNG12,GNG5,HBEGF,HRAS,IKBKB,IRAK1,IRAK2,ITGAV,ITGB3,JUN,KRAS,LASP1,MAP2K1,MAP2K2,MAP2K4,MAP4K4,MAPK3,MAPK8,MAPK9,MRAS,MTOR,MYL12B,MYL9,NAPEPLD,NFKBIA,NFKBIB,NOX4,NRAS,PAK2,PDGFC,PIK3C2A,PIK3CB,PIK3R1,PIK3R3,PLD1,PRKCA,PRKCD,PRKCE,PRKD1,PTK2,RAC3,RAF1…				IL-8 Signaling	14.1	0.533	-4.207	AKT1,AKT2,AKT3,ANGPT2,ARAF,BAX,BCL2,BCL2L1,BRAF,CCND2,CCND3,CHUK,CSTB,EGFR,ELP1,FLT1,FNBP1,FOS,GNA11,GNA12,GNA13,GNAI1,GNAI2,GNAI3,GNAO1,GNAQ,GNAS,GNB1,GNB2,GNB4,GNB5,GNG10,GNG11,GNG12,GNG5,HBEGF,HMOX1,IKBKB,IKBKG,IQGAP1,IRAK1,IRAK2,ITGAV,ITGB3,JUN,KRAS,LASP1,MAP2K1,MAP2K2,MAP2K4,MAP4K4,MAPK1,MAPK3,MAPK8,MAPK9,MRAS,MTOR,MYL12B,MYL9,NAPEPLD,NFKB1,NFKBIA,NFKBIB,NOX4,NRAS,PAK2,PDGFC,PIK3C2A,PIK3C2B,…
37	RAC Signaling	16.1	0.62	4.628	ABI2,ACTR2,ACTR3,ARFIP2,ARPC1B,ARPC2,ARPC3,ARPC4,ARPC5,ARPC5L,BRK1,CD44,CFL1,CFL2,CYFIP1,ELK1,ELK4,IQGAP1,ITGA1,ITGA3,ITGA5,ITGA7,ITGA8,ITGA9,ITGAV,ITGB1,ITGB3,ITGB5,ITGB8,JUN,KRAS,MAP2K1,MAP2K2,MAP2K4,MAP2K7,MAP3K1,MAPK1,MAPK3,MAPK8,MRAS,NCKAP1,NFKB1,NFKB2,NOX4,NRAS,PAK2,PAK3,PARD3,PARD6A,PI4KA,PIK3C2A,PIK3C2B,PIK3C3,PIK3CA,PIK3CB,PIK3R1,PIK3R2,PIK3R3,PIK3R4,PIKFYVE,PIP4K2A,PIP4K2C,PIP5K1A,PIP5K…			RAC Signaling	8.96	0.431	4.808	ABI2,ACTR2,ACTR3,ARFIP2,ARPC1A,ARPC3,ARPC4,ARPC5L,BRK1,CD44,CFL1,CFL2,CYFIP1,ELK4,HRAS,ITGA1,ITGA5,ITGA7,ITGA9,ITGAV,ITGB1,ITGB3,ITGB5,JUN,KRAS,MAP2K1,MAP2K2,MAP2K4,MAP2K7,MAP3K1,MAPK3,MAPK8,MRAS,NOX4,NRAS,PAK2,PARD3,PARD6A,PIK3C2A,PIK3CB,PIK3R1,PIK3R3,PIKFYVE,PIP4K2A,PIP4K2C,PIP5K1B,PIP5K1C,PLD1,PTK2,RAC3,RAF1,RALA,RALB,RAP1A,RAP1B,RELB,RHOA,RPS6KB1,RRAS				RAC Signaling	13.1	0.584	-3.543	ABI2,ACTR3,ARFIP2,ARPC1A,ARPC2,ARPC3,ARPC4,ARPC5,CD44,CFL1,CFL2,CYFIP1,ELK1,ELK4,IQGAP1,ITGA1,ITGA3,ITGA5,ITGA7,ITGA8,ITGA9,ITGAV,ITGB1,ITGB3,ITGB5,ITGB8,JUN,KRAS,MAP2K1,MAP2K2,MAP2K4,MAP2K7,MAP3K1,MAPK1,MAPK3,MAPK8,MRAS,NCKAP1,NFKB1,NFKB2,NOX4,NRAS,PAK2,PAK3,PARD3,PARD6A,PI4KA,PIK3C2A,PIK3C2B,PIK3C3,PIK3CA,PIK3CB,PIK3R1,PIK3R2,PIK3R3,PIK3R4,PIKFYVE,PIP4K2A,PIP4K2C,PIP5K1A,PIP5K1B,PIP5K1C,PLD1,PR…
38	Cardiac Hypertrophy Signaling	15.9	0.521	4.017	ADCY3,ADCY5,ADCY6,ADCY9,AKT1,ATF2,CACNA1C,CACNA1D,CACNA2D1,CACNB2,CACNB3,Calm1 (includes others),CHP1,CREB1,CREBBP,EIF2B1,EIF2B2,EIF2B3,EIF2B4,EIF2B5,ELK1,EP300,FNBP1,GNA11,GNA12,GNA13,GNAI2,GNAI3,GNAQ,GNAS,GNB1,GNB2,GNB5,GNG10,GNG11,GNG12,GNG5,GRB2,GSK3B,GUCY1A1,HSPB1,IGF1R,IRS1,JUN,KRAS,MAP2K1,MAP2K2,MAP2K3,MAP2K4,MAP2K7,MAP3K1,MAP3K10,MAP3K14,MAP3K2,MAP3K3,MAP3K4,MAP3K5,MAP3K6,Map3k7,MAP3K8,MA…			Cardiac Hypertrophy Signaling	15.3	0.421	2.8	ADCY3,ADCY6,ADCY9,AKT1,ATF2,CACNA1C,CACNA2D1,CACNA2D3,CACNB2,CACNB3,Calm1 (includes others),Cdc42,CREB1,CREBBP,EIF2B1,EIF2B2,EIF2B4,EIF4E,EP300,FNBP1,GNA11,GNA13,GNAI1,GNAI3,GNAO1,GNAQ,GNAS,GNB1,GNB2,GNB4,GNG10,GNG11,GNG12,GNG5,GUCY1A1,GUCY1B1,HAND2,HRAS,HSPB1,IGF1R,IRS1,JUN,KRAS,MAP2K1,MAP2K2,MAP2K3,MAP2K4,MAP2K7,MAP3K1,MAP3K10,MAP3K2,MAP3K3,Map3k7,MAP3K8,MAPK14,MAPK3,MAPK8,MAPK9,MAPKAPK2,MEF2A,…				Cardiac Hypertrophy Signaling	16.8	0.529	-4.971	ADCY3,ADCY5,ADCY6,ADCY7,ADCY9,AKT1,ATF2,CACNA1C,CACNA1D,CACNA2D1,CACNA2D3,CACNB2,CACNB3,Calm1 (includes others),CHP1,CREB1,CREBBP,EIF2B2,EIF2B3,EIF2B4,EIF2B5,EIF4E,ELK1,EP300,FNBP1,GNA11,GNA12,GNA13,GNAI1,GNAI2,GNAI3,GNAO1,GNAQ,GNAS,GNB1,GNB2,GNB4,GNB5,GNG10,GNG11,GNG12,GNG5,GRB2,GSK3B,GUCY1A1,GUCY1B1,HAND2,HSPB1,IGF1R,IRS1,JUN,KRAS,MAP2K1,MAP2K2,MAP2K3,MAP2K4,MAP2K7,MAP3K1,MAP3K10,MAP3K14,MAP3K2…
39	ERK5 Signaling	15.8	0.743	3.328	AKT1,ATF2,ATF4,BAD,CREB1,CREB3,CREB3L1,CREB3L2,CREB5,CREBBP,EGFR,ELK4,FOS,FOSL1,FOXO3,GAB1,GNA12,GNA13,GNAQ,IL6ST,KRAS,MAP2K5,MAP3K2,MAP3K3,MAP3K8,MEF2A,MEF2B,MEF2C,MEF2D,MRAS,MYC,NRAS,PTPN11,RALA,RALB,RAP1A,RAP1B,RAP2A,RASD1,RPS6KA3,RPS6KA5,RPS6KB1,RPS6KB2,RPS6KC1,RRAS,RRAS2,SGK1,SRC,WNK1,YWHAB,YWHAE,YWHAG,YWHAH,YWHAQ,YWHAZ			ERK5 Signaling	10.6	0.554	2.722	AKT1,ATF2,ATF4,BAD,CREB1,CREB3,CREB3L1,CREB3L2,CREBBP,EGFR,ELK4,FOS,GAB1,GNA13,GNAQ,HRAS,IL6ST,KRAS,MAP3K2,MAP3K3,MAP3K8,MEF2A,MEF2C,MEF2D,MRAS,NRAS,RALA,RALB,RAP1A,RAP1B,RPS6KA3,RPS6KB1,RPS6KB2,RRAS,SGK1,SRC,WNK1,YWHAE,YWHAH,YWHAQ,YWHAZ				ERK5 Signaling	11.8	0.676	-4.522	AKT1,ATF2,ATF4,CREB1,CREB3L1,CREB3L2,CREB5,CREBBP,CTF1,EGFR,ELK4,FOS,FOSL1,FOXO3,GAB1,GNA12,GNA13,GNAQ,IL6ST,KRAS,MAP2K5,MAP3K2,MAP3K3,MAP3K8,MEF2A,MEF2B,MEF2C,MEF2D,MRAS,MYC,NRAS,PTPN11,RALA,RALB,RAP1B,RAP2A,RASD1,RPS6KA3,RPS6KA5,RPS6KB1,RPS6KB2,RPS6KC1,RRAS,RRAS2,SGK1,SRC,WNK1,YWHAE,YWHAG,YWHAZ
40	Ephrin Receptor Signaling	15.7	0.554	3.019	ABI1,ABL1,ACP1,ACTR2,ACTR3,ADAM10,AKT1,AKT2,AKT3,ARPC1B,ARPC2,ARPC3,ARPC4,ARPC5,ARPC5L,ATF2,ATF4,AXIN1,BCAR1,CFL1,CFL2,CREB1,CREB3,CREB3L1,CREB3L2,CREB5,CREBBP,CRK,CRKL,CXCL12,DOK1,EFNA5,EFNB2,EPHA3,EPHA4,FGF1,GNA11,GNA12,GNA13,GNAI2,GNAI3,GNAQ,GNAS,GNB1,GNB2,GNB5,GNG10,GNG11,GNG12,GNG5,GRB2,GRINA,ITGA1,ITGA3,ITGA5,ITGA7,ITGA8,ITGA9,ITGAV,ITGB1,ITGB3,ITGB5,ITGB8,ITSN1,JAK2,KALRN,KRAS,MAP2K1,MAP2K…			Ephrin Receptor Signaling	11	0.411	3.845	ACTR2,ACTR3,ADAM10,AKT1,AKT2,ARPC1A,ARPC3,ARPC4,ARPC5L,ATF2,ATF4,AXIN1,CFL1,CFL2,CREB1,CREB3,CREB3L1,CREB3L2,CREBBP,CRK,DOK1,EFNA5,FGF1,GNA11,GNA13,GNAI1,GNAI3,GNAO1,GNAQ,GNAS,GNB1,GNB2,GNB4,GNG10,GNG11,GNG12,GNG5,GRINA,HRAS,ITGA1,ITGA5,ITGA7,ITGA9,ITGAV,ITGB1,ITGB3,ITGB5,ITSN1,JAK2,KALRN,KRAS,MAP2K1,MAP2K2,MAP4K4,MAPK3,MRAS,NCK1,NGEF,NRAS,PAK2,PDGFA,PDGFC,PDGFD,PTK2,RAC3,RAF1,RALA,RALB,RAP1A,RAP…				Ephrin Receptor Signaling	15.2	0.55	-4.583	ABI1,ABL1,ACP1,ACTR3,ADAM10,AKT1,AKT2,AKT3,ARPC1A,ARPC2,ARPC3,ARPC4,ARPC5,ATF2,ATF4,AXIN1,BCAR1,CFL1,CFL2,CREB1,CREB3L1,CREB3L2,CREB5,CREBBP,CRK,CRKL,CXCL12,EFNA5,EFNB2,EPHA3,EPHA4,FGF1,GNA11,GNA12,GNA13,GNAI1,GNAI2,GNAI3,GNAO1,GNAQ,GNAS,GNB1,GNB2,GNB4,GNB5,GNG10,GNG11,GNG12,GNG5,GRB2,ITGA1,ITGA3,ITGA5,ITGA7,ITGA8,ITGA9,ITGAV,ITGB1,ITGB3,ITGB5,ITGB8,ITSN1,JAK2,KALRN,KRAS,MAP2K1,MAP2K2,MAP3K14,MAP…
41	Apelin Endothelial Signaling Pathway	15.6	0.61	3.064	ADCY3,ADCY5,ADCY6,ADCY9,AKT1,AKT2,AKT3,ARNT,Calm1 (includes others),FOS,GNA11,GNA12,GNA13,GNAI2,GNAI3,GNAQ,GNAS,GNB1,GNB2,GNB5,GNG10,GNG11,GNG12,GNG5,GUCY1A1,HDAC4,HDAC5,HIF1A,JUN,KLF2,KRAS,MAP2K1,MAP2K2,MAP2K4,MAPK1,MAPK3,MAPK8,MAPK9,MEF2A,MEF2B,MEF2C,MEF2D,MRAS,MTOR,NFKB1,NFKB2,NRAS,PIK3C2A,PIK3C2B,PIK3C3,PIK3CA,PIK3CB,PIK3R1,PIK3R2,PIK3R3,PIK3R4,PLCB3,PLCB4,PRKAA1,PRKAA2,PRKAB2,PRKAG1,PRKAG2,P…			Apelin Endothelial Signaling Pathway	13	0.482	3.474	ADCY3,ADCY6,ADCY9,AKT1,AKT2,ARNT,Calm1 (includes others),FOS,GNA11,GNA13,GNAI1,GNAI3,GNAO1,GNAQ,GNAS,GNB1,GNB2,GNB4,GNG10,GNG11,GNG12,GNG5,GUCY1A1,GUCY1B1,HDAC4,HDAC5,HIF1A,HRAS,JUN,KLF2,KRAS,MAP2K1,MAP2K2,MAP2K4,MAPK3,MAPK8,MAPK9,MEF2A,MEF2C,MEF2D,MRAS,MTOR,NRAS,PIK3C2A,PIK3CB,PIK3R1,PIK3R3,PLCB1,PLCB3,PLCB4,PRKAA1,PRKAA2,PRKAB2,PRKAG1,PRKCA,PRKCD,PRKCE,PRKD1,RAF1,RALA,RALB,RAP1A,RAP1B,RELB,RPS6…				Apelin Endothelial Signaling Pathway	17.5	0.631	-4.331	ADCY3,ADCY5,ADCY6,ADCY7,ADCY9,AKT1,AKT2,AKT3,ARNT,Calm1 (includes others),FOS,GNA11,GNA12,GNA13,GNAI1,GNAI2,GNAI3,GNAO1,GNAQ,GNAS,GNB1,GNB2,GNB4,GNB5,GNG10,GNG11,GNG12,GNG5,GUCY1A1,GUCY1B1,HDAC4,HDAC5,HIF1A,JUN,KLF2,KRAS,MAP2K1,MAP2K2,MAP2K4,MAPK1,MAPK3,MAPK8,MAPK9,MEF2A,MEF2B,MEF2C,MEF2D,MRAS,MTOR,NFKB1,NFKB2,NRAS,PIK3C2A,PIK3C2B,PIK3C3,PIK3CA,PIK3CB,PIK3R1,PIK3R2,PIK3R3,PIK3R4,PLCB1,PLCB3,PLCB4…
42	RANK Signaling in Osteoclasts	15.5	0.692	6.303	AKT1,AKT2,AKT3,BIRC2,BIRC3,Calm1 (includes others),CBL,CHP1,CHUK,ELK1,ELP1,FOS,IKBKB,IKBKG,JUN,MAP2K1,MAP2K2,MAP2K4,MAP2K7,MAP3K1,MAP3K10,MAP3K14,MAP3K2,MAP3K3,MAP3K4,MAP3K5,MAP3K6,Map3k7,MAP3K8,MAPK1,MAPK14,MAPK3,MAPK8,MAPK9,MITF,NFATC1,NFKB1,NFKB2,NFKBIA,NFKBIB,PIK3C2A,PIK3C2B,PIK3C3,PIK3CA,PIK3CB,PIK3R1,PIK3R2,PIK3R3,PIK3R4,PPP3CA,PPP3CB,PPP3CC,PPP3R1,RAF1,REL,RELA,RELB,SRC,TAB2,TNFRSF11A,TRAF…			RANK Signaling in Osteoclasts	6.09	0.429	2.333	AKT1,AKT2,BIRC2,Calm1 (includes others),CHUK,FOS,GSN,IKBKB,JUN,MAP2K1,MAP2K2,MAP2K4,MAP2K7,MAP3K1,MAP3K10,MAP3K2,MAP3K3,Map3k7,MAP3K8,MAPK14,MAPK3,MAPK8,MAPK9,MITF,NFKBIA,NFKBIB,PIK3C2A,PIK3CB,PIK3R1,PIK3R3,PPP3CB,PPP3R1,RAF1,RELB,SRC,TAB2,TNFRSF11A,TRAF5,XIAP				RANK Signaling in Osteoclasts	16.2	0.703	-4.557	AKT1,AKT2,AKT3,BIRC2,BIRC3,Calm1 (includes others),CBL,CHP1,CHUK,ELK1,ELP1,FOS,IKBKB,IKBKG,JUN,MAP2K1,MAP2K2,MAP2K4,MAP2K7,MAP3K1,MAP3K10,MAP3K14,MAP3K2,MAP3K3,MAP3K4,MAP3K5,MAP3K6,Map3k7,MAP3K8,MAPK1,MAPK14,MAPK3,MAPK8,MAPK9,MITF,NFATC1,NFKB1,NFKB2,NFKBIA,NFKBIB,PIK3C2A,PIK3C2B,PIK3C3,PIK3CA,PIK3CB,PIK3R1,PIK3R2,PIK3R3,PIK3R4,PPP3CA,PPP3CB,PPP3CC,PPP3R1,RAF1,REL,RELA,RELB,SRC,TAB2,TNFRSF11A,TRAF…
43	IL-3 Signaling	15.3	0.722	4.811	AKT1,AKT2,AKT3,BAD,CHP1,CRKL,ELK1,FOS,FOXO1,GAB2,GRB2,JAK1,JAK2,JUN,KRAS,MAP2K1,MAP2K2,MAPK1,MAPK3,MRAS,NRAS,PIK3C2A,PIK3C2B,PIK3C3,PIK3CA,PIK3CB,PIK3R1,PIK3R2,PIK3R3,PIK3R4,PPP3CA,PPP3CB,PPP3CC,PPP3R1,PRKCA,PRKCD,PRKCE,PRKCG,PRKCI,PRKD1,PRKD3,RAC1,RAF1,RALA,RALB,RAP1A,RAP1B,RAP2A,RAPGEF1,RASD1,RRAS,RRAS2,SHC1,SOS1,STAT3,STAT5B,STAT6			IL-3 Signaling	5.45	0.43	2.401	AKT1,AKT2,BAD,FOS,FOXO1,GAB2,HRAS,JAK1,JAK2,JUN,KRAS,MAP2K1,MAP2K2,MAPK3,MRAS,NRAS,PIK3C2A,PIK3CB,PIK3R1,PIK3R3,PPP3CB,PPP3R1,PRKCA,PRKCD,PRKCE,PRKD1,RAF1,RALA,RALB,RAP1A,RAP1B,RRAS,STAT3,STAT5B				IL-3 Signaling	12.2	0.671	-4.16	AKT1,AKT2,AKT3,CHP1,CRKL,ELK1,FOS,FOXO1,GAB2,GRB2,JAK1,JAK2,JUN,KRAS,MAP2K1,MAP2K2,MAPK1,MAPK3,MRAS,NRAS,PIK3C2A,PIK3C2B,PIK3C3,PIK3CA,PIK3CB,PIK3R1,PIK3R2,PIK3R3,PIK3R4,PPP3CA,PPP3CB,PPP3CC,PPP3R1,PRKCA,PRKCE,PRKCG,PRKCI,PRKD3,RAC1,RAF1,RALA,RALB,RAP1B,RAP2A,RAPGEF1,RASD1,RRAS,RRAS2,SHC1,SOS1,STAT3,STAT5B,STAT6
44	CXCR4 Signaling	15.2	0.577	3.534	ADCY3,ADCY5,ADCY6,ADCY9,AKT1,AKT2,AKT3,ARHGEF11,BCAR1,CRK,CXCL12,DOCK1,EGR1,ELK1,ELMO1,ELMO2,FNBP1,FOS,GNA11,GNA12,GNA13,GNAI2,GNAI3,GNAQ,GNAS,GNB1,GNB2,GNB5,GNG10,GNG11,GNG12,GNG5,GUCY1A1,ITPR1,JUN,KRAS,MAP2K1,MAP2K2,MAP2K4,MAPK1,MAPK3,MAPK8,MAPK9,MRAS,MYL12A,MYL12B,MYL6,MYL9,NRAS,PAK2,PAK3,PIK3C2A,PIK3C2B,PIK3C3,PIK3CA,PIK3CB,PIK3R1,PIK3R2,PIK3R3,PIK3R4,PLCB3,PLCB4,PRKCA,PRKCD,PRKCE,PRKCG,PRKCI…			CXCR4 Signaling	14.3	0.47	2.605	ADCY3,ADCY6,ADCY9,AKT1,AKT2,ARHGEF11,Cdc42,CRK,DOCK1,EGR1,ELMO1,FNBP1,FOS,GNA11,GNA13,GNAI1,GNAI3,GNAO1,GNAQ,GNAS,GNB1,GNB2,GNB4,GNG10,GNG11,GNG12,GNG5,GUCY1A1,GUCY1B1,HRAS,ITPR1,JUN,KRAS,MAP2K1,MAP2K2,MAP2K4,MAPK3,MAPK8,MAPK9,MRAS,MYL12A,MYL12B,MYL4,MYL6,MYL9,NRAS,PAK2,PIK3C2A,PIK3CB,PIK3R1,PIK3R3,PLCB1,PLCB3,PLCB4,PRKCA,PRKCD,PRKCE,PRKD1,PTK2,RAC3,RAF1,RALA,RALB,RAP1A,RAP1B,RHOA,RHOB,RHOBTB1,RH…				CXCR4 Signaling	14.7	0.571	-3.488	ADCY3,ADCY5,ADCY6,ADCY7,ADCY9,AKT1,AKT2,AKT3,ARHGEF11,BCAR1,CRK,CXCL12,DOCK1,EGR1,ELK1,ELMO1,ELMO2,FNBP1,FOS,GNA11,GNA12,GNA13,GNAI1,GNAI2,GNAI3,GNAO1,GNAQ,GNAS,GNB1,GNB2,GNB4,GNB5,GNG10,GNG11,GNG12,GNG5,GUCY1A1,GUCY1B1,ITPR1,JUN,KRAS,MAP2K1,MAP2K2,MAP2K4,MAPK1,MAPK3,MAPK8,MAPK9,MRAS,MYL12A,MYL12B,MYL4,MYL9,NRAS,PAK2,PAK3,PIK3C2A,PIK3C2B,PIK3C3,PIK3CA,PIK3CB,PIK3R1,PIK3R2,PIK3R3,PIK3R4,PLCB1,PLCB…
45	Glioblastoma Multiforme Signaling	15.1	0.573	3.71	AKT1,AKT2,AKT3,APC,AXIN1,CCND2,CCND3,CDK4,CDK6,CDKN1A,CDKN1B,CTNNB1,E2F3,E2F5,E2F6,EGFR,FNBP1,FOXO1,FZD2,FZD5,FZD6,FZD7,FZD8,GRB2,GSK3B,IGF1R,ITPR1,KRAS,MAP2K1,MAP2K2,MAPK1,MAPK3,MDM2,MRAS,MTOR,MYC,NF1,NF2,NRAS,PDGFA,PDGFC,PDGFD,PDGFRB,PDIA3,PIK3C2A,PIK3C2B,PIK3C3,PIK3CA,PIK3CB,PIK3R1,PIK3R2,PIK3R3,PIK3R4,PLCB3,PLCB4,PLCD1,PLCD3,PLCE1,PLCG1,PLCL1,PRKCD,PTEN,RAC1,RAC3,RAF1,RALA,RALB,RAP1A,RAP1B,RA…			Glioblastoma Multiforme Signaling	9.76	0.415	3.098	AKT1,AKT2,AXIN1,CCND2,Cdc42,CDK4,CDK6,CDKN1A,CTNNB1,E2F4,E2F5,E2F6,EGFR,FNBP1,FOXO1,FZD1,FZD2,FZD7,FZD8,HRAS,IGF1R,ITPR1,KRAS,MAP2K1,MAP2K2,MAPK3,MDM2,MRAS,MTOR,NF1,NF2,NRAS,PDGFA,PDGFC,PDGFD,PDGFRB,PDIA3,PIK3C2A,PIK3CB,PIK3R1,PIK3R3,PLCB1,PLCB3,PLCB4,PLCD1,PLCE1,PRKCD,RAC3,RAF1,RALA,RALB,RAP1A,RAP1B,RHOA,RHOB,RHOBTB1,RHOC,RHOD,RHOG,RHOJ,RHOQ,RND2,RND3,RPS6KB1,RRAS,SMO,SOS2,SRC,TP53,TSC2,WNT16				Glioblastoma Multiforme Signaling	13.5	0.556	-4.417	AKT1,AKT2,AKT3,APC,AXIN1,CCND2,CCND3,CDK4,CDK6,CDKN1A,CDKN1B,CTNNB1,E2F3,E2F5,E2F6,EGFR,FNBP1,FOXO1,FZD1,FZD2,FZD5,FZD6,FZD7,FZD8,GRB2,GSK3B,IGF1R,ITPR1,KRAS,MAP2K1,MAP2K2,MAPK1,MAPK3,MDM2,MRAS,MTOR,MYC,NF1,NF2,NRAS,PDGFA,PDGFC,PDGFD,PDGFRB,PDIA3,PIK3C2A,PIK3C2B,PIK3C3,PIK3CA,PIK3CB,PIK3R1,PIK3R2,PIK3R3,PIK3R4,PLCB1,PLCB3,PLCB4,PLCD1,PLCD3,PLCE1,PLCG1,PLCL1,PTEN,RAC1,RAF1,RALA,RALB,RAP1B,RAP2A,RA…
46	Human Embryonic Stem Cell Pluripotency	14.9	0.547	5.911	ACVR1,ACVR2A,ACVRL1,AKT1,AKT2,AKT3,APC,ARAF,AXIN1,BDNF,BMP1,BMP2,BMP3,BMPR1B,BMPR2,BRAF,CTNNB1,ELK1,FGF2,FGFR1,FGFR2,FGFRL1,FOXO1,FZD2,FZD5,FZD6,FZD7,FZD8,GRB2,GSK3B,HSP90AA1,HSP90AB1,HSP90B1,ID1,ID2,ID3,ID4,INHBA,JAK1,JAK2,KLF2,KLF4,KRAS,LIFR,MAP2K1,MAP2K2,MAP2K3,MAP2K4,MAP2K5,MAP2K7,MAPK1,MRAS,MYC,NFYA,NFYB,NFYC,NRAS,NTF3,NTRK3,PDGFA,PDGFC,PDGFD,PDGFRB,PDPK1,PIK3C2A,PIK3C2B,PIK3C3,PIK3CA,PIK3CB…			Human Embryonic Stem Cell Pluripotency	7.79	0.373	2.425	ACVR1,AKT1,AKT2,ARAF,AXIN1,BMP1,BMP2,BMP3,BMPR2,CTNNB1,DVL1,FGF2,FGFR1,FGFRL1,FOXO1,FZD1,FZD2,FZD7,FZD8,HRAS,HSP90AA1,HSP90AB1,HSP90B1,ID2,ID3,ID4,INHBA,JAK1,JAK2,KLF2,KLF4,KRAS,MAP2K1,MAP2K2,MAP2K3,MAP2K4,MAP2K7,MRAS,NFYB,NRAS,NTF3,NTRK3,PDGFA,PDGFC,PDGFD,PDGFRB,PIK3C2A,PIK3CB,PIK3R1,PIK3R3,PRKCA,PRKCD,PRKCE,PRKD1,RAF1,RALA,RALB,RAP1A,RAP1B,REST,RIF1,RRAS,SMAD1,SMAD2,SMAD5,SMAD6,SMAD7,SMO,SOS2,S…				Human Embryonic Stem Cell Pluripotency	12	0.517	-5.491	ACVR1,ACVR2A,ACVRL1,AKT1,AKT2,AKT3,APC,ARAF,AXIN1,BMP1,BMP2,BMP3,BMPR1A,BMPR1B,BMPR2,BRAF,CTNNB1,DVL1,ELK1,FGFR1,FGFR2,FGFRL1,FOXO1,FZD1,FZD2,FZD5,FZD6,FZD7,FZD8,GRB2,GSK3B,HSP90AA1,HSP90AB1,HSP90B1,ID3,ID4,INHBA,JAK1,JAK2,KLF2,KLF4,KRAS,LIFR,MAP2K1,MAP2K2,MAP2K3,MAP2K4,MAP2K5,MAP2K7,MAPK1,MRAS,MYC,NFYA,NFYB,NFYC,NRAS,NTRK3,PDGFA,PDGFC,PDGFD,PDGFRB,PDPK1,PIK3C2A,PIK3C2B,PIK3C3,PIK3CA,PIK3CB,PIK3R…
47	Neurotrophin/TRK Signaling	14.9	0.718	4.341	AKT1,ATF2,ATF4,BDNF,CREB1,CREB3,CREB3L1,CREB3L2,CREB5,CREBBP,FOS,FRS2,GAB1,GRB2,JUN,KRAS,MAP2K1,MAP2K2,MAP2K3,MAP2K4,MAP2K5,MAP2K7,MAP3K5,MAPK1,MAPK3,MAPK8,MRAS,NRAS,NTF3,NTRK3,PDPK1,PIK3C2A,PIK3C2B,PIK3C3,PIK3CA,PIK3CB,PIK3R1,PIK3R2,PIK3R3,PIK3R4,PLCG1,PTPN11,RAF1,RALA,RALB,RAP1A,RAP1B,RAP2A,RASD1,RRAS,RRAS2,SHC1,SOS1,SOS2,SPRY1,SPRY2			Neurotrophin/TRK Signaling	6.63	0.462	3.889	AKT1,ATF2,ATF4,CREB1,CREB3,CREB3L1,CREB3L2,CREBBP,FOS,FRS2,GAB1,HRAS,JUN,KRAS,MAP2K1,MAP2K2,MAP2K3,MAP2K4,MAP2K7,MAPK3,MAPK8,MRAS,NRAS,NTF3,NTRK3,PIK3C2A,PIK3CB,PIK3R1,PIK3R3,RAF1,RALA,RALB,RAP1A,RAP1B,RRAS,SOS2				Neurotrophin/TRK Signaling	11.9	0.667	-3.355	AKT1,ATF2,ATF4,CREB1,CREB3L1,CREB3L2,CREB5,CREBBP,FOS,FRS2,GAB1,GRB2,JUN,KRAS,MAP2K1,MAP2K2,MAP2K3,MAP2K4,MAP2K5,MAP2K7,MAP3K5,MAPK1,MAPK3,MAPK8,MRAS,NRAS,NTRK3,PDPK1,PIK3C2A,PIK3C2B,PIK3C3,PIK3CA,PIK3CB,PIK3R1,PIK3R2,PIK3R3,PIK3R4,PLCG1,PTPN11,RAF1,RALA,RALB,RAP1B,RAP2A,RASD1,RRAS,RRAS2,SHC1,SOS1,SOS2,SPRY1,SPRY2
48	Acute Myeloid Leukemia Signaling	14.7	0.681	4.061	AKT1,AKT2,AKT3,ARAF,BAD,BRAF,GRB2,IDH1,IDH2,IDH3B,IDH3G,JUP,KITLG,KRAS,MAP2K1,MAP2K2,MAP2K3,MAP2K4,MAP2K5,MAP2K7,MAPK1,MAPK3,MRAS,MTOR,MYC,NFKB1,NFKB2,NRAS,PIK3C2A,PIK3C2B,PIK3C3,PIK3CA,PIK3CB,PIK3R1,PIK3R2,PIK3R3,PIK3R4,PIM1,RAF1,RALA,RALB,RAP1A,RAP1B,RAP2A,RARA,RASD1,REL,RELA,RELB,RPS6KB1,RPS6KB2,RRAS,RRAS2,RUNX1,SOS1,SOS2,STAT3,STAT5B,TCF3,TCF4,TCF7L1,TCF7L2			Acute Myeloid Leukemia Signaling	7.1	0.451	2.744	AKT1,AKT2,ARAF,BAD,EIF4EBP1,HRAS,IDH1,IDH3B,IDH3G,JUP,KITLG,KRAS,MAP2K1,MAP2K2,MAP2K3,MAP2K4,MAP2K7,MAPK3,MRAS,MTOR,NRAS,PIK3C2A,PIK3CB,PIK3R1,PIK3R3,PIM1,RAF1,RALA,RALB,RAP1A,RAP1B,RELB,RPS6KB1,RPS6KB2,RRAS,SOS2,STAT3,STAT5B,TCF4,TCF7L1,TCF7L2				Acute Myeloid Leukemia Signaling	11.2	0.626	-3.938	AKT1,AKT2,AKT3,ARAF,BRAF,GRB2,IDH1,IDH2,IDH3G,JUP,KRAS,MAP2K1,MAP2K2,MAP2K3,MAP2K4,MAP2K5,MAP2K7,MAPK1,MAPK3,MRAS,MTOR,MYC,NFKB1,NFKB2,NRAS,PIK3C2A,PIK3C2B,PIK3C3,PIK3CA,PIK3CB,PIK3R1,PIK3R2,PIK3R3,PIK3R4,PIM1,RAF1,RALA,RALB,RAP1B,RAP2A,RARA,RASD1,REL,RELA,RELB,RPS6KB1,RPS6KB2,RRAS,RRAS2,RUNX1,SOS1,SOS2,STAT3,STAT5B,TCF3,TCF7L1,TCF7L2
49	Neuregulin Signaling	14.7	0.632	3.207	ADAM17,AKT1,AKT2,AKT3,BAD,CDKN1B,CRK,CRKL,DCN,DLG4,EGFR,ELK1,ERBB4,ERBIN,EREG,ERRFI1,GRB2,HBEGF,HSP90AA1,HSP90AB1,HSP90B1,ITGA1,ITGA3,ITGA5,ITGA7,ITGA8,ITGA9,ITGAV,ITGB1,ITGB3,ITGB5,ITGB8,KRAS,MAP2K1,MAP2K2,MAPK1,MAPK3,MRAS,MTOR,MYC,NRAS,PDPK1,PIK3R1,PIK3R2,PIK3R3,PLCG1,PRKCA,PRKCD,PRKCE,PRKCG,PRKCI,PRKD1,PRKD3,PSEN1,PTEN,PTPN11,RAF1,RALA,RALB,RAP1A,RAP1B,RAP2A,RASD1,RNF41,RPS6,RPS6KB1,RPS6KB2,RR…			Neuregulin Signaling	7.1	0.419	2	ADAM17,AKT1,AKT2,BAD,CRK,DCN,EGFR,ERBIN,ERRFI1,HBEGF,HRAS,HSP90AA1,HSP90AB1,HSP90B1,ITGA1,ITGA5,ITGA7,ITGA9,ITGAV,ITGB1,ITGB3,ITGB5,KRAS,MAP2K1,MAP2K2,MAPK3,MRAS,MTOR,NRAS,PIK3R1,PIK3R3,PRKCA,PRKCD,PRKCE,PRKD1,PSEN1,RAF1,RALA,RALB,RAP1A,RAP1B,RNF41,RPS6,RPS6KB1,RPS6KB2,RRAS,SOS2,SRC,STAT5B				Neuregulin Signaling	10.5	0.573	-3.286	ADAM17,AKT1,AKT2,AKT3,CDKN1B,CRK,CRKL,DCN,DLG4,EGFR,ELK1,ERBIN,GRB2,HBEGF,HSP90AA1,HSP90AB1,HSP90B1,ITGA1,ITGA3,ITGA5,ITGA7,ITGA8,ITGA9,ITGAV,ITGB1,ITGB3,ITGB5,ITGB8,KRAS,MAP2K1,MAP2K2,MAPK1,MAPK3,MRAS,MTOR,MYC,NRAS,PDPK1,PIK3R1,PIK3R2,PIK3R3,PLCG1,PRKCA,PRKCE,PRKCG,PRKCI,PRKD3,PSEN1,PTEN,PTPN11,RAF1,RALA,RALB,RAP1B,RAP2A,RASD1,RNF41,RPS6,RPS6KB1,RPS6KB2,RRAS,RRAS2,SHC1,SOS1,SOS2,SRC,STAT5B
50	Polyamine Regulation in Colon Cancer	14.7	0.78	2.064	AKT1,AKT1S1,AKT2,AKT3,APC,ARAF,AZIN1,BCL2L11,BRAF,CSNK2A1,CSNK2A2,CSNK2B,CTNNB1,DHPS,DOHH,EIF5A,EIF5A2,FOS,GSK3B,JUN,KRAS,MAP2K1,MAP2K2,MAP2K3,MAP2K4,MAP2K5,MAP2K7,MAPK1,MAPK3,MTA1,MTOR,MXD1,MYC,OAZ1,ODC1,RAF1,RHOA,RPTOR,SAT1,SLC3A2,SMS,STIM1,TCF4,TCF7L2,TP53,TRPC1			Polyamine Regulation in Colon Cancer	11	0.61	2	AKT1,AKT1S1,AKT2,ARAF,AZIN1,CSNK2A1,CSNK2A2,CSNK2B,CTNNB1,DHPS,DOHH,EIF5A,FOS,JUN,KRAS,MAP2K1,MAP2K2,MAP2K3,MAP2K4,MAP2K7,MAPK3,MTA1,MTOR,MXD1,OAZ1,ODC1,RAF1,RHOA,RPTOR,SAT1,SLC3A2,SMS,SRM,TCF4,TCF7L2,TP53				Polyamine Regulation in Colon Cancer	12	0.729	-2.287	AKT1,AKT1S1,AKT2,AKT3,APC,ARAF,AZIN1,BCL2L11,BRAF,CSNK2A1,CSNK2A2,CSNK2B,CTNNB1,DHPS,FOS,GSK3B,JUN,KRAS,MAP2K1,MAP2K2,MAP2K3,MAP2K4,MAP2K5,MAP2K7,MAPK1,MAPK3,MTA1,MTOR,MXD1,MYC,OAZ1,ODC1,RAF1,RHOA,RPTOR,SAT1,SLC3A2,SMS,SRM,STIM1,TCF7L2,TP53,TRPC1
51	LPS-stimulated MAPK Signaling	14.6	0.694	4.355	ATF1,ATF2,CHUK,CREB1,ELK1,ELP1,FOS,IKBKB,IKBKG,JUN,KRAS,MAP2K1,MAP2K2,MAP2K3,MAP2K4,MAP3K14,MAP3K5,MAPK1,MAPK14,MAPK3,MAPK8,MAPK9,MRAS,NFKB1,NFKB2,NFKBIA,NFKBIB,NRAS,PIK3C2A,PIK3C2B,PIK3C3,PIK3CA,PIK3CB,PIK3R1,PIK3R2,PIK3R3,PIK3R4,PRKCA,PRKCD,PRKCE,PRKCG,PRKCI,PRKD1,PRKD3,RAC1,RAF1,RALA,RALB,RAP1A,RAP1B,RAP2A,RASD1,REL,RELA,RELB,RRAS,RRAS2,SRF,TLR4			LPS-stimulated MAPK Signaling	6.02	0.435	3.667	ATF1,ATF2,CHUK,CREB1,FOS,HRAS,IKBKB,JUN,KRAS,MAP2K1,MAP2K2,MAP2K3,MAP2K4,MAPK14,MAPK3,MAPK8,MAPK9,MRAS,NFKBIA,NFKBIB,NRAS,PIK3C2A,PIK3CB,PIK3R1,PIK3R3,PRKCA,PRKCD,PRKCE,PRKD1,RAF1,RALA,RALB,RAP1A,RAP1B,RELB,RRAS,TLR4				LPS-stimulated MAPK Signaling	12.4	0.659	-3.221	ATF1,ATF2,CHUK,CREB1,ELK1,ELP1,FOS,IKBKB,IKBKG,JUN,KRAS,MAP2K1,MAP2K2,MAP2K3,MAP2K4,MAP3K14,MAP3K5,MAPK1,MAPK14,MAPK3,MAPK8,MAPK9,MRAS,NFKB1,NFKB2,NFKBIA,NFKBIB,NRAS,PIK3C2A,PIK3C2B,PIK3C3,PIK3CA,PIK3CB,PIK3R1,PIK3R2,PIK3R3,PIK3R4,PRKCA,PRKCE,PRKCG,PRKCI,PRKD3,RAC1,RAF1,RALA,RALB,RAP1B,RAP2A,RASD1,REL,RELA,RELB,RRAS,RRAS2,SRF,TLR4
52	Actin Cytoskeleton Signaling	14.4	0.516	2.66	ABI2,ACTA2,ACTB,ACTG1,ACTG2,ACTN1,ACTN2,ACTN4,ACTR2,ACTR3,APC,ARHGAP24,ARHGAP35,ARHGEF1,ARHGEF12,ARHGEF6,ARHGEF7,ARPC1B,ARPC2,ARPC3,ARPC4,ARPC5,ARPC5L,BCAR1,BRK1,CFL1,CFL2,CRK,CRKL,CYFIP1,DIAPH1,DOCK1,F2R,FGD1,FGF1,FGF13,FGF2,FLNA,FN1,GIT1,GNA12,GNA13,GNG12,GRB2,IQGAP1,ITGA1,ITGA3,ITGA5,ITGA7,ITGA8,ITGA9,ITGAV,ITGB1,ITGB3,ITGB5,ITGB8,KRAS,MAP2K1,MAP2K2,MAPK1,MAPK3,MPRIP,MRAS,MSN,MYH11,MYH9,MYL12A…			Actin Cytoskeleton Signaling	10.5	0.385	2.393	ABI2,ACTA2,ACTB,ACTG1,ACTG2,ACTN1,ACTN2,ACTN4,ACTR2,ACTR3,ARHGAP24,ARHGEF1,ARHGEF12,ARHGEF7,ARPC1A,ARPC3,ARPC4,ARPC5L,BRK1,CFL1,CFL2,CRK,CYFIP1,DIAPH1,DOCK1,F2R,FGF1,FGF2,FLNA,FN1,GNA13,GNG12,GSN,HRAS,ITGA1,ITGA5,ITGA7,ITGA9,ITGAV,ITGB1,ITGB3,ITGB5,KRAS,MAP2K1,MAP2K2,MAPK3,MPRIP,MRAS,MSN,MYH10,MYH11,MYH9,MYL12A,MYL12B,MYL4,MYL6,MYL9,MYO10,MYO18A,MYO18B,NRAS,PAK2,PDGFA,PDGFC,PDGFD,PFN1,PFN2,PIK3C2…				Actin Cytoskeleton Signaling	12.2	0.496	-2.915	ABI2,ACTA2,ACTB,ACTG1,ACTG2,ACTN1,ACTN2,ACTN4,ACTR3,APC,ARHGAP24,ARHGAP35,ARHGEF1,ARHGEF12,ARHGEF6,ARHGEF7,ARPC1A,ARPC2,ARPC3,ARPC4,ARPC5,BCAR1,CFL1,CFL2,CRK,CRKL,CSK,CYFIP1,DIAPH1,DOCK1,F2R,FGD1,FGF1,FGF13,FLNA,FN1,GIT1,GNA12,GNA13,GNG12,GRB2,IQGAP1,ITGA1,ITGA3,ITGA5,ITGA7,ITGA8,ITGA9,ITGAV,ITGB1,ITGB3,ITGB5,ITGB8,KRAS,MAP2K1,MAP2K2,MAPK1,MAPK3,MPRIP,MRAS,MSN,MYH10,MYH11,MYH9,MYL12A,MYL12B,MYL4,…
53	Endocannabinoid Developing Neuron Pathway	14.4	0.614	2.25	ADCY3,ADCY5,ADCY6,ADCY9,AKT1,AKT1S1,AKT2,AKT3,ARAF,ATF2,ATF4,BRAF,CDKN1B,CREB1,CREB3,CREB3L1,CREB3L2,CREB5,CREBBP,CTNNB1,GNAI2,GNAI3,GNB1,GNB2,GNB5,GNG10,GNG11,GNG12,GNG5,GSK3B,GUCY1A1,KRAS,MAP2K1,MAP2K2,MAP2K3,MAP2K4,MAP2K5,MAP2K7,MAPK1,MAPK14,MAPK3,MAPK6,MAPK8,MAPK9,MGLL,MRAS,MTOR,NRAS,PIK3C2A,PIK3C2B,PIK3C3,PIK3CA,PIK3CB,PIK3R1,PIK3R2,PIK3R3,PIK3R4,PRKACA,PRKACB,PRKAG1,PRKAG2,PRKAR1A,PRKAR2A,R…			Endocannabinoid Developing Neuron Pathway	12.3	0.488	3.394	ADCY3,ADCY6,ADCY9,AKT1,AKT1S1,AKT2,ARAF,ATF2,ATF4,CREB1,CREB3,CREB3L1,CREB3L2,CREBBP,CTNNB1,GNAI1,GNAI3,GNAO1,GNB1,GNB2,GNB4,GNG10,GNG11,GNG12,GNG5,GUCY1A1,GUCY1B1,HRAS,KRAS,MAP2K1,MAP2K2,MAP2K3,MAP2K4,MAP2K7,MAPK14,MAPK3,MAPK6,MAPK8,MAPK9,MGLL,MRAS,MTOR,NRAS,PIK3C2A,PIK3CB,PIK3R1,PIK3R3,PRKACB,PRKAG1,PRKAR1A,PRKAR2A,RAC3,RAF1,RALA,RALB,RAP1A,RAP1B,RHOA,RPTOR,RRAS,SRC,STAT3				Endocannabinoid Developing Neuron Pathway	15.1	0.622	-3	ADCY3,ADCY5,ADCY6,ADCY7,ADCY9,AKT1,AKT1S1,AKT2,AKT3,ARAF,ATF2,ATF4,BRAF,CDKN1B,CREB1,CREB3L1,CREB3L2,CREB5,CREBBP,CTNNB1,GNAI1,GNAI2,GNAI3,GNAO1,GNB1,GNB2,GNB4,GNB5,GNG10,GNG11,GNG12,GNG5,GSK3B,GUCY1A1,GUCY1B1,KRAS,MAP2K1,MAP2K2,MAP2K3,MAP2K4,MAP2K5,MAP2K7,MAPK1,MAPK14,MAPK3,MAPK6,MAPK8,MAPK9,MGLL,MRAS,MTOR,NRAS,PIK3C2A,PIK3C2B,PIK3C3,PIK3CA,PIK3CB,PIK3R1,PIK3R2,PIK3R3,PIK3R4,PRKACA,PRKACB,PRKAG1…
54	HIF1Œ± Signaling	14.3	0.536	3.927	ADM,AKT1,AKT2,AKT3,APEX1,ARAF,ARNT,BRAF,CAMK1D,CAMK2D,CAMK2G,CCNG2,CDKN1A,CHP1,COPS5,CREBBP,CUL2,EGLN1,EGLN2,ELOC,EP300,FGF2,FLT1,GPI,HIF1A,HIF1AN,HK1,HK2,HMOX1,HSP90AA1,HSPA14,HSPA1A/HSPA1B,Hspa1b,HSPA2,HSPA4,HSPA8,HSPA9,JUN,KDM1A,KRAS,LDHA,LDHB,MAP2K1,MAP2K2,MAP2K3,MAP2K4,MAP2K5,MAP2K7,MAPK1,MAPK3,MDM2,MKNK2,MMP14,MMP16,MMP17,MMP23B,MRAS,MTOR,NCOA1,NOX4,NRAS,P4HTM,PDGFC,PIK3C2A,PIK3C2B,PIK3C3,P…			HIF1Œ± Signaling	13.3	0.431	2.132	ADM,AKT1,AKT2,APEX1,ARAF,ARNT,CAMK1D,CAMK2G,CDKN1A,CREBBP,CUL2,EGLN2,EIF4E,EIF4EBP1,ELOC,EP300,FGF2,FLT1,HIF1A,HK2,HRAS,HSP90AA1,HSPA14,HSPA1A/HSPA1B,Hspa1b,HSPA2,HSPA4,HSPA5,HSPA8,HSPA9,JUN,KDM1A,KRAS,LDHA,LDHB,MAP2K1,MAP2K2,MAP2K3,MAP2K4,MAP2K7,MAPK3,MDM2,MKNK2,MMP14,MMP16,MMP17,MMP23B,MRAS,MTOR,NAA10,NCOA1,NOX4,NRAS,P4HTM,PDGFC,PIK3C2A,PIK3CB,PIK3R1,PIK3R3,PKM,PPP3CB,PPP3R1,PRKCA,PRKCD,PRKCE,P…				HIF1Œ± Signaling	13.3	0.526	-3.657	ADM,AKT1,AKT2,AKT3,APEX1,ARAF,ARNT,BRAF,CAMK1,CAMK1D,CAMK2D,CAMK2G,CDKN1A,CHP1,COPS5,CREBBP,CUL2,EGLN1,EGLN2,EIF4E,ELOC,EP300,FLT1,GPI,HIF1A,HIF1AN,HK1,HK2,HMOX1,HSP90AA1,HSPA14,HSPA1A/HSPA1B,Hspa1b,HSPA2,HSPA4,HSPA5,HSPA8,HSPA9,JUN,KDM1A,KRAS,MAP2K1,MAP2K2,MAP2K3,MAP2K4,MAP2K5,MAP2K7,MAPK1,MAPK3,MDM2,MKNK2,MMP14,MMP16,MMP17,MMP23B,MRAS,MTOR,NAA10,NCOA1,NOX4,NRAS,P4HTM,PDGFC,PIK3C2A,PIK3C2B,PIK3C…
55	Mitotic G2-G2/M phases	14.3	0.543	2.694	ACTR1A,ALMS1,BTRC,CCNH,CDK11A,CDK5RAP2,CDK7,CDKN1A,CEP164,CEP250,CEP290,CEP57,CEP63,CKAP5,CLASP1,CNTRL,CSNK1D,CSNK1E,CUL1,DCTN1,DCTN2,DCTN3,DYNC1H1,DYNLL1,E2F3,EP300,FBXL7,FBXW11,HAUS2,HAUS8,HSP90AA1,HSP90AB1,LCMT1,LIN52,MAPRE1,MNAT1,MZT1,NDE1,NEDD1,ODF2,OPTN,PAFAH1B1,PCM1,PPME1,PPP1CB,PPP1R12A,PPP2CA,PPP2CB,PPP2R1A,PPP2R1B,PPP2R2A,PRKACA,PSMA1,PSMA2,PSMA3,PSMA5,PSMA6,PSMA7,PSMB1,PSMB2,PSMB3,PSMB…			Mitotic G2-G2/M phases	11.4	0.417	5.159	CCNH,CDK7,CDKN1A,CEP164,CETN2,CKAP5,CLASP1,CSNK1D,CSNK1E,DCTN1,DCTN2,DCTN3,DYNC1H1,DYNLL1,EP300,FBXL7,HAUS8,HSP90AA1,HSP90AB1,LCMT1,LIN37,MAPRE1,MNAT1,MZT1,MZT2A,OPTN,PCM1,PHLDA1,PPME1,PPP1CB,PPP1R12A,PPP2CA,PPP2R1A,PSMA1,PSMA2,PSMA3,PSMA5,PSMA6,PSMA7,PSMB1,PSMB2,PSMB3,PSMB4,PSMB5,PSMB6,PSMB7,PSMC1,PSMC2,PSMC4,PSMC5,PSMC6,PSMD1,PSMD10,PSMD11,PSMD12,PSMD13,PSMD14,PSMD3,PSMD4,PSMD5,PSMD6,PSMD7,PSMD…				Mitotic G2-G2/M phases	12.4	0.523	-2.157	ACTR1A,ALMS1,BTRC,CCNH,CDK11A,CDK5RAP2,CDK7,CDKN1A,CEP164,CEP250,CEP290,CEP57,CEP63,CKAP5,CLASP1,CNTRL,CSNK1D,CSNK1E,CUL1,DCTN1,DCTN2,DYNC1H1,DYNLL1,E2F3,EP300,FBXL7,FBXW11,HAUS1,HAUS2,HAUS8,HSP90AA1,HSP90AB1,LCMT1,LIN37,LIN52,MAPRE1,MNAT1,MZT1,MZT2A,NDE1,NEDD1,ODF2,OPTN,PAFAH1B1,PCM1,PHLDA1,PPME1,PPP1CB,PPP1R12A,PPP2CA,PPP2CB,PPP2R1A,PPP2R1B,PPP2R2A,PRKACA,PSMA1,PSMA2,PSMA3,PSMA5,PSMB1,PSMB10,PS…
56	Cardiac Hypertrophy Signaling (Enhanced)	14.1	0.434	8.093	ACE,ACVR1,ACVR1B,ACVR2A,ADCY3,ADCY5,ADCY6,ADCY9,AKAP13,AKT1,AKT2,AKT3,APEX1,ATF2,ATF6,ATP2A2,ATP2A3,BMPR2,CACNA1C,CACNA1D,CACNA2D1,CACNB2,CACNB3,Calm1 (includes others),CAMK2D,CAMK2G,CHP1,CHUK,CTNNB1,DIAPH1,Diaph2,DLG1,DVL3,Eda,EIF2B1,EIF2B2,EIF2B3,EIF2B4,EIF2B5,ELK1,ENPP1,EP300,FGF1,FGF13,FGF2,FGFR1,FGFR2,FGFRL1,FZD2,FZD5,FZD6,FZD7,FZD8,GDE1,GHR,GNA11,GNA12,GNA13,GNAI2,GNAI3,GNAQ,GNAS,GNB1,GNB2,…			Cardiac Hypertrophy Signaling (Enhanced)	9.34	0.314	4.246	ACE,ACVR1,ADCY3,ADCY6,ADCY9,AKAP13,AKT1,AKT2,APEX1,ATF2,ATP2A2,ATP2A3,BMPR2,CACNA1C,CACNA2D1,CACNA2D3,CACNB2,CACNB3,Calm1 (includes others),CAMK2G,CHUK,CTNNB1,DIAPH1,DLG1,DVL1,DVL3,EIF2B1,EIF2B2,EIF2B4,EIF4E,EIF4EBP1,ENPP1,EP300,FGF1,FGF2,FGFR1,FGFRL1,FZD1,FZD2,FZD7,FZD8,GDE1,GNA11,GNA13,GNAI1,GNAI3,GNAQ,GNAS,GNB1,GNB2,GNB4,GNG10,GNG11,GNG12,GNG5,GSK3A,GUCY1A1,GUCY1B1,HAND2,HDAC2,HDAC3,HDAC4,HDAC…				Cardiac Hypertrophy Signaling (Enhanced)	15.7	0.443	-7.28	ACE,ACVR1,ACVR1B,ACVR2A,ADCY3,ADCY5,ADCY6,ADCY7,ADCY9,AKAP13,AKT1,AKT2,AKT3,APEX1,ATF2,ATF6,ATP2A2,BMPR2,CACNA1C,CACNA1D,CACNA2D1,CACNA2D3,CACNB2,CACNB3,Calm1 (includes others),CAMK2D,CAMK2G,CHP1,CHUK,CTF1,CTNNB1,DIAPH1,Diaph2,DLG1,DVL1,DVL3,Eda,EIF2B2,EIF2B3,EIF2B4,EIF2B5,EIF4E,ELK1,ENPP1,EP300,FGF1,FGF13,FGFR1,FGFR2,FGFRL1,FZD1,FZD2,FZD5,FZD6,FZD7,FZD8,GDE1,GHR,GNA11,GNA12,GNA13,GNAI1,GNAI2,GNA…
57	Transcriptional activity of SMAD2/SMAD3:SMAD4 heterotrimer	14.1	0.816	4.11	CCNC,CCNK,CCNT1,CCNT2,CDK8,CDK9,COL1A2,E2F5,EP300,FURIN,HDAC1,JUNB,MAPK1,MAPK3,MYC,NCOR1,NCOR2,NEDD4L,PARP1,PPM1A,RNF111,RPS27A,SERPINE1,SKI,SKIL,SMAD2,SMAD3,SMAD4,SMAD7,SMURF2,SNW1,SP1,TFDP1,TFDP2,TGIF1,TRIM33,UBC,USP9X,WWTR1,YBX1			Transcriptional activity of SMAD2/SMAD3:SMAD4 heterotrimer	7.82	0.571	2.117	CCNC,CCNT1,CCNT2,CDK8,CDK9,COL1A2,E2F4,E2F5,EP300,FURIN,JUNB,MAPK3,NCOR1,NCOR2,PPM1A,RNF111,RPS27A,SERPINE1,SKI,SKIL,SMAD2,SMAD7,SMURF2,TFDP1,TFDP2,TRIM33,UBC,YBX1				Transcriptional activity of SMAD2/SMAD3:SMAD4 heterotrimer	12.1	0.776	-3.212	CCNC,CCNK,CCNT1,CCNT2,CDK8,CDK9,COL1A2,E2F5,EP300,FURIN,HDAC1,JUNB,MAPK1,MAPK3,MYC,NCOR1,NCOR2,NEDD4L,PARP1,PPM1A,RNF111,RPS27A,SERPINE1,SKI,SKIL,SMAD2,SMAD3,SMAD4,SMAD7,SMURF2,SNW1,SP1,TFDP1,TGIF1,TRIM33,UBC,USP9X,WWTR1
58	RAB GEFs exchange GTP for GDP on RABs	13.9	0.674	3.873	AKT1,AKT2,AKT3,ANKRD27,CCZ1/CCZ1B,CHM,DENND1A,DENND1B,DENND4A,DENND4C,DENND5A,DENND5B,DENND6A,GAPVD1,GDI1,GDI2,MON1A,RAB10,RAB12,RAB13,RAB14,RAB18,RAB1B,RAB21,RAB27A,RAB27B,RAB31,RAB35,RAB3GAP1,RAB3GAP2,RAB3IP,RAB5A,RAB5B,RAB5C,RAB6A,RAB7A,RAB8A,RAB8B,RAB9A,RABGEF1,RIC1,RIN2,RIN3,SBF1,SBF2,TRAPPC1,TRAPPC10,TRAPPC11,TRAPPC12,TRAPPC13,TRAPPC2,TRAPPC2L,TRAPPC3,TRAPPC4,TRAPPC5,TRAPPC6A,TRAPPC8,TRAPPC…			RAB GEFs exchange GTP for GDP on RABs	6.9	0.449	2.846	AKT1,AKT2,CHM,DENND1A,DENND1B,DENND4A,DENND4C,DENND5A,GAPVD1,GDI2,HPS4,RAB10,RAB12,RAB13,RAB18,RAB1A,RAB21,RAB31,RAB3A,RAB3IP,RAB5A,RAB5C,RAB6A,RAB6B,RAB9A,RIC1,RIN2,SBF2,TRAPPC1,TRAPPC13,TRAPPC2,TRAPPC2L,TRAPPC3,TRAPPC4,TRAPPC5,TRAPPC6A,TRAPPC6B,TRAPPC8,TRAPPC9,YWHAE				RAB GEFs exchange GTP for GDP on RABs	9.92	0.607	-3.266	AKT1,AKT2,AKT3,ANKRD27,CCZ1/CCZ1B,CHM,DENND1A,DENND1B,DENND4A,DENND4C,DENND5A,DENND5B,DENND6A,GAPVD1,GDI1,HPS4,MON1A,RAB13,RAB14,RAB1A,RAB1B,RAB27A,RAB27B,RAB31,RAB35,RAB3GAP1,RAB3GAP2,RAB3IP,RAB5A,RAB5B,RAB5C,RAB6A,RAB7A,RAB8A,RAB8B,RABGEF1,RIC1,RIN2,SBF1,SBF2,TRAPPC1,TRAPPC10,TRAPPC11,TRAPPC12,TRAPPC13,TRAPPC2,TRAPPC2L,TRAPPC3,TRAPPC5,TRAPPC6B,TRAPPC8,TRAPPC9,ULK1,YWHAE
59	Cachexia Signaling Pathway	13.6	0.465	3.288	ACVR1,ACVR1B,ACVR2A,ADCY3,ADCY5,ADCY6,ADCY9,AGO1,AGO2,AGO3,AKT1,AKT2,AKT3,BCL2,BECN1,BMPR2,CAPN1,CAPN2,CAPN7,CASP3,CASP4,CASP8,CASQ1,CEBPB,CEBPD,CHUK,DDIT4,Eda,EIF2A,EIF2AK2,EIF2AK3,EIF2B1,EIF2B2,EIF2B3,EIF2B4,EIF2B5,EIF2S1,EIF2S2,EIF2S3,EP300,ERN1,FBXO21,FBXO30,FBXO32,FOXO1,FOXO3,FOXO4,GABARAPL1,GNAS,GSK3A,GSK3B,GUCY1A1,HSP90AA1,HSP90AB1,HSP90B1,HSPA14,HSPA1A/HSPA1B,Hspa1b,HSPA2,HSPA4,HSPA8,HSPA…			Cachexia Signaling Pathway	11.4	0.356	4.456	ACVR1,ADCY3,ADCY6,ADCY9,AKT1,AKT2,BCL2,BMPR2,CAPN2,CAPNS1,CASP4,CASP8,CASQ1,CEBPB,CEBPD,CHUK,DDIT4,EIF2A,EIF2B1,EIF2B2,EIF2B4,EIF2S1,EIF2S2,EIF2S3,EP300,ERN1,FBXO32,FOXO1,GABARAPL1,GNAS,GSK3A,GUCY1A1,GUCY1B1,HSP90AA1,HSP90AB1,HSP90B1,HSPA14,HSPA1A/HSPA1B,Hspa1b,HSPA2,HSPA4,HSPA5,HSPA8,HSPA9,IFNGR2,IGF1R,IKBKB,IL17B,INHBA,INSR,IRS1,KLF15,LPL,MALAT1,MAP1LC3B,MAP2K4,MAPK14,MAPK3,MAPK8,MAPK9,MEF2C,MT…				Cachexia Signaling Pathway	12.5	0.457	-2.623	ACVR1,ACVR1B,ACVR2A,ADCY3,ADCY5,ADCY6,ADCY7,ADCY9,AGO1,AGO2,AGO3,AKT1,AKT2,AKT3,BCL2,BECN1,BMPR2,CAPN1,CAPN2,CAPN7,CAPNS1,CASP3,CASP4,CASP8,CASQ1,CEBPB,CEBPD,CHUK,DDIT4,Eda,EIF2A,EIF2AK2,EIF2AK3,EIF2B2,EIF2B3,EIF2B4,EIF2B5,EIF2S1,EIF2S2,EIF2S3,EP300,ERN1,FBXO21,FBXO30,FBXO32,FOXO1,FOXO3,FOXO4,GABARAPL1,GDF15,GNAS,GSK3A,GSK3B,GUCY1A1,GUCY1B1,HSP90AA1,HSP90AB1,HSP90B1,HSPA14,HSPA1A/HSPA1B,Hspa1b,HS…
60	Cholecystokinin/Gastrin-mediated Signaling	13.5	0.613	4.608	ATF2,BCAR1,CREM,EGFR,ELK1,EPHA4,FNBP1,FOS,GNA12,GNA13,GNAQ,GRB2,ITPR1,JUN,KRAS,MAP2K1,MAP2K2,MAP2K3,MAP2K4,MAP2K5,MAPK1,MAPK14,MAPK3,MAPK8,MAPK9,MEF2A,MEF2B,MEF2C,MEF2D,MRAS,NRAS,PLCB3,PLCB4,PRKCA,PRKCD,PRKCE,PRKCG,PRKCI,PRKD1,PRKD3,PTGS2,PTK2,PXN,RAC1,RAC3,RAF1,RALA,RALB,RAP1A,RAP1B,RAP2A,RASD1,RHOA,RHOB,RHOBTB1,RHOC,RHOD,RHOG,RHOJ,RHOQ,RHOT1,RHOU,RND1,RND3,ROCK1,ROCK2,RRAS,RRAS2,SHC1,SOS1,SOS2,…			Cholecystokinin/Gastrin-mediated Signaling	9.26	0.454	2.941	ATF2,Cdc42,CREM,EGFR,FNBP1,FOS,GNA13,GNAQ,HRAS,ITPR1,JUN,KRAS,MAP2K1,MAP2K2,MAP2K3,MAP2K4,MAPK14,MAPK3,MAPK8,MAPK9,MEF2A,MEF2C,MEF2D,MRAS,NRAS,PLCB1,PLCB3,PLCB4,PRKCA,PRKCD,PRKCE,PRKD1,PTK2,RAC3,RAF1,RALA,RALB,RAP1A,RAP1B,RHOA,RHOB,RHOBTB1,RHOC,RHOD,RHOG,RHOJ,RHOQ,RND2,RND3,ROCK1,ROCK2,RRAS,SOS2,SRC				Cholecystokinin/Gastrin-mediated Signaling	9.55	0.555	-4.826	ATF2,BCAR1,CREM,EGFR,ELK1,EPHA4,FNBP1,FOS,GNA12,GNA13,GNAQ,GRB2,ITPR1,JUN,KRAS,MAP2K1,MAP2K2,MAP2K3,MAP2K4,MAP2K5,MAPK1,MAPK14,MAPK3,MAPK8,MAPK9,MEF2A,MEF2B,MEF2C,MEF2D,MRAS,NRAS,PLCB1,PLCB3,PLCB4,PRKCA,PRKCE,PRKCG,PRKCI,PRKD3,PTK2,PXN,RAC1,RAF1,RALA,RALB,RAP1B,RAP2A,RASD1,RHOA,RHOB,RHOBTB1,RHOG,RHOJ,RHOQ,RHOT1,RND1,RND2,RND3,ROCK1,RRAS,RRAS2,SHC1,SOS1,SOS2,SRC,SRF
[truncated: 145 more rows]

## Sheet: SMC_Upstream_reg
	SMC_NDvsD (LCMV)									SMC_NDvsD (STZ)									SMC_cASOvsAPOC3 (LCMV)
	Upstream Regulator	Expr Log Ratio	Molecule Type	Predicted Activation State	Activation z-score	p-value of overlap	B-H corrected p-value	Target Molecules in Dataset		Upstream Regulator	Expr Log Ratio	Molecule Type	Predicted Activation State	Activation z-score	p-value of overlap	B-H corrected p-value	Target Molecules in Dataset		Upstream Regulator	Expr Log Ratio	Molecule Type	Predicted Activation State	Activation z-score	p-value of overlap	B-H corrected p-value	Target Molecules in Dataset
Number of signficant pathways	Upstream regulators activated by D and reversed by APOC3 ASO
[truncated: 73 more rows]
